# Supplementary material for: Angiogenic Transformation in Human Brain Micro Endothelial Cells: Whole Genome DNA Methylation and Transcriptomic Analysis
Source: Front Physiol. 2019 Dec 11;10:1502. doi: 10.3389/fphys.2019.01502 (PMC6917667; doi:10.3389/fphys.2019.01502)
Supplement: TABLE S2 — Enlists the upregulated and downregulated genes (>twofold; p < 0.05) as a result of capillary tube formation of HBMECs. [file Table_2.XLSX]

## Sheet: Protein-Coding
Supplemental Table S2: Enlists the upregulated and downregulated genes (>2-fold; P<0.05) as a result of capillary tube formation of HBMECs.
Systematic	PrimaryAccession	GeneSymbol	UniGeneID	EntrezGene	Cytoband	GO	Control	Control2	Control3	Control4	Control5	Control6	TF	TF8	TF9	TF10	TF11	TF12	CTRL	TF14	TF/CTRL	P-value	Ctrl TF	GeneName	Description	Sequence
A_23_P114903	NM_002155	HSPA6	Hs.654614	3310	hs|1q23.3	GO:0005524(ATP binding)|GO:0005737(cytoplasm)|GO:0005814(centriole)|GO:0005829(cytosol)|GO:0006200(ATP catabolic process)|GO:0006986(response to unfolded protein)|GO:0008180(signalosome)|GO:0019899(enzyme binding)|GO:0031072(heat shock protein binding)|GO:0034605(cellular response to heat)|GO:0042026(protein refolding)|GO:0042623(ATPase activity, coupled)|GO:0051082(unfolded protein binding)|GO:0…	0.053005	0.0263262	0.0228272	0.0366385	0.028374	0.0240301	5.38561	5.84405	6.59635	7.81799	5.75685	7.52076	0	6	211	1.8e-09		heat shock 70kDa protein 6 (HSP70B')	Homo sapiens heat shock 70kDa protein 6 (HSP70B') (HSPA6), mRNA [NM_002155]	CAAAATGCAAGACAAGTGTCGGGAAGTCCTTGCCTGGCTGGAGCACAACCAGCTGGCAGA
A_23_P28598	NM_004405	DLX2	Hs.419	1746	hs|2q31.1	GO:0000122(negative regulation of transcription from RNA polymerase II promoter)|GO:0000976(transcription regulatory region sequence-specific DNA binding)|GO:0003682(chromatin binding)|GO:0003700(sequence-specific DNA binding transcription factor activity)|GO:0003727(single-stranded RNA binding)|GO:0005634(nucleus)|GO:0007420(brain development)|GO:0009954(proximal/distal pattern formation)|GO:002…	0.0339563	0.0281441	0.0240561	0.0162069	0.0248853	0.0262889	3.79736	3.94002	3.87016	3.97824	3.27662	3.48721	0	6	148.7	5.78e-09		distal-less homeobox 2	Homo sapiens distal-less homeobox 2 (DLX2), mRNA [NM_004405]	CAGACTTTTTTGTAAACCCCCAGTTGTGAAAACTGCAGTTTAGCAGTGACCTCAGCAACC
A_24_P363408	NM_012259	HEY2	Hs.144287	23493	hs|6q22.31	GO:0000122(negative regulation of transcription from RNA polymerase II promoter)|GO:0000983(RNA polymerase II core promoter sequence-specific DNA binding transcription factor activity)|GO:0000988(protein binding transcription factor activity)|GO:0001102(RNA polymerase II activating transcription factor binding)|GO:0001570(vasculogenesis)|GO:0003150(muscular septum morphogenesis)|GO:0003151(outflo…	0.0885985	0.0287573	0.0308501	0.0824681	0.0403526	0.0761475	6.15334	7.58913	6.86808	8.3484	6.70327	6.28102	0	6	133.5	1.19e-06		hes-related family bHLH transcription factor with YRPW motif 2	Homo sapiens hes-related family bHLH transcription factor with YRPW motif 2 (HEY2), mRNA [NM_012259]	AAGCTCTTTGTCAAGTTAGTGATTGCATTTGATCCCAAAACAAGATGAATGTATGCAATG
A_23_P429998	NM_006732	FOSB	Hs.590958	2354	hs|19q13.32	GO:0000122(negative regulation of transcription from RNA polymerase II promoter)|GO:0003677(DNA binding)|GO:0003690(double-stranded DNA binding)|GO:0003700(sequence-specific DNA binding transcription factor activity)|GO:0005634(nucleus)|GO:0006366(transcription from RNA polymerase II promoter)|GO:0007565(female pregnancy)|GO:0008134(transcription factor binding)|GO:0009612(response to mechanical …	0.299586	0.0714423	0.13861	0.171464	0.176183	0.234729	15.6511	16.7097	16.0048	16.6551	14.3165	18.8952	5	6	98.19	1.73e-06		FBJ murine osteosarcoma viral oncogene homolog B	Homo sapiens FBJ murine osteosarcoma viral oncogene homolog B (FOSB), transcript variant 1, mRNA [NM_006732]	TTTTTACAATCTGTATCTTTGACAATTCTGGGTGCGAGTGTGAGAGTGTGAGCAGGGCTT
A_23_P97112	NM_000450	SELE	Hs.82848	6401	hs|1q24.2	GO:0002092(positive regulation of receptor internalization)|GO:0002523(leukocyte migration involved in inflammatory response)|GO:0002687(positive regulation of leukocyte migration)|GO:0004888(transmembrane signaling receptor activity)|GO:0005515(protein binding)|GO:0005615(extracellular space)|GO:0005886(plasma membrane)|GO:0005901(caveola)|GO:0005905(coated pit)|GO:0006954(inflammatory response)…	0.255233	0.125586	0.229117	0.237499	0.134834	0.152369	10.8695	13.5785	7.03866	13.3451	11.2132	11.6241	6	6	60.78	6.37e-10		selectin E	Homo sapiens selectin E (SELE), mRNA [NM_000450]	GATGTGATAAGGATCAGAACAGCAGAGGTTCTTTTAAAGGGGCAGAAAAACTCTGGGAAA
A_33_P3243887	NM_000641	IL11	Hs.467304	3589	hs|19q13.42	GO:0005125(cytokine activity)|GO:0005142(interleukin-11 receptor binding)|GO:0005576(extracellular region)|GO:0005615(extracellular space)|GO:0005737(cytoplasm)|GO:0007267(cell-cell signaling)|GO:0008083(growth factor activity)|GO:0008284(positive regulation of cell proliferation)|GO:0030183(B cell differentiation)|GO:0030219(megakaryocyte differentiation)|GO:0033138(positive regulation of peptid…	0.0405367	0.0469285	0.0518744	0.0372016	0.0220817	0.0444291	2.34434	2.87294	2.5417	2.09717	2.02839	1.91386	0	6	58.16	6.4e-09		interleukin 11	Homo sapiens interleukin 11 (IL11), transcript variant 1, mRNA [NM_000641]	GTGTATGATTGTCTGTATTTTACAGAATTTCTGCCATGACTGTGTATTTTGCATGACACA
A_23_P143143	NM_002166	ID2	Hs.180919	3398	hs|2p25.1	GO:0000122(negative regulation of transcription from RNA polymerase II promoter)|GO:0000785(chromatin)|GO:0001656(metanephros development)|GO:0001779(natural killer cell differentiation)|GO:0003149(membranous septum morphogenesis)|GO:0003166(bundle of His development)|GO:0005515(protein binding)|GO:0005634(nucleus)|GO:0005730(nucleolus)|GO:0005737(cytoplasm)|GO:0005813(centrosome)|GO:0005829(cyto…	0.115556	0.240799	0.221668	0.326981	0.344229	0.249292	15.602	16.3225	13.7599	13.5763	13.1963	9.4472	5	6	56.99	4.99e-08		inhibitor of DNA binding 2, dominant negative helix-loop-helix protein	Homo sapiens inhibitor of DNA binding 2, dominant negative helix-loop-helix protein (ID2), mRNA [NM_002166]	AGGCTTCTGAATTCCCTTCTGAGTTAATGTCAAATGACAGCAAAGCACTGTGTGGCTGAA
A_24_P250922	NM_000963	PTGS2	Hs.196384	5743	hs|1q31.1	GO:0001516(prostaglandin biosynthetic process)|GO:0001525(angiogenesis)|GO:0004601(peroxidase activity)|GO:0004666(prostaglandin-endoperoxide synthase activity)|GO:0005634(nucleus)|GO:0005737(cytoplasm)|GO:0005789(endoplasmic reticulum membrane)|GO:0006693(prostaglandin metabolic process)|GO:0006928(cellular component movement)|GO:0006954(inflammatory response)|GO:0006979(response to oxidative st…	0.711336	1.45838	1.64049	1.52576	1.25955	1.31503	67.039	75.9911	56.2327	67.4199	60.2155	62.348	6	6	50.64	6.02e-08		prostaglandin-endoperoxide synthase 2 (prostaglandin G/H synthase and cyclooxygenase)	Homo sapiens prostaglandin-endoperoxide synthase 2 (prostaglandin G/H synthase and cyclooxygenase) (PTGS2), mRNA [NM_000963]	TGAGATATTTAAGGTTGAATGTTTGTCCTTAGGATAGGCCTATGTGCTAGCCCACAAAGA
A_32_P83845	NM_001040708	HEY1	Hs.234434	23462	hs|8q21.13	GO:0000122(negative regulation of transcription from RNA polymerase II promoter)|GO:0000983(RNA polymerase II core promoter sequence-specific DNA binding transcription factor activity)|GO:0000988(protein binding transcription factor activity)|GO:0001525(angiogenesis)|GO:0001570(vasculogenesis)|GO:0002076(osteoblast development)|GO:0003184(pulmonary valve morphogenesis)|GO:0003190(atrioventricular…	0.590676	0.477631	0.463259	0.250281	0.37468	0.441994	19.8089	24.4929	19.0766	19.6804	19.4117	22.8427	6	6	49.61	4.72e-08		hes-related family bHLH transcription factor with YRPW motif 1	Homo sapiens hes-related family bHLH transcription factor with YRPW motif 1 (HEY1), transcript variant 2, mRNA [NM_001040708]	GGGCTATAAAATATCATTTTTCAGGTTTATTCTTTTAGCAGGTGTAGTTAAACGACCTCC
A_23_P142878	NM_032827	ATOH8	Hs.135569	84913	hs|2p11.2	GO:0003677(DNA binding)|GO:0005634(nucleus)|GO:0006351(transcription, DNA-dependent)|GO:0006355(regulation of transcription, DNA-dependent)|GO:0007399(nervous system development)|GO:0030154(cell differentiation)|GO:0046983(protein dimerization activity)	0.611635	0.365869	0.417635	0.331373	0.395824	0.358908	17.724	17.2044	19.521	21.2538	17.7594	22.288	6	6	47.43	9.9e-10		atonal homolog 8 (Drosophila)	Homo sapiens atonal homolog 8 (Drosophila) (ATOH8), mRNA [NM_032827]	GGGCAGGCCCTGCCATGGACAGAAAAAGAGTTTTTCTCTTGTTCAGCCTGCACGTGGCCT
A_23_P398566	NM_173200	NR4A3	Hs.279522	8013	hs|9q31.1	GO:0001077(RNA polymerase II core promoter proximal region sequence-specific DNA binding transcription factor activity involved in positive regulation of transcription)|GO:0001707(mesoderm formation)|GO:0003677(DNA binding)|GO:0003707(steroid hormone receptor activity)|GO:0004887(thyroid hormone receptor activity)|GO:0005634(nucleus)|GO:0005654(nucleoplasm)|GO:0005667(transcription factor complex…	0.142343	0.0920079	0.0752063	0.101881	0.116292	0.104206	3.05885	3.40001	3.22997	3.32832	3.03379	3.75888	4	6	31.87	1.24e-08		nuclear receptor subfamily 4, group A, member 3	Homo sapiens nuclear receptor subfamily 4, group A, member 3 (NR4A3), transcript variant 3, mRNA [NM_173200]	GAAATCAGGAAGCCACCAGCTGTTAATGGAGAGTGCCTTGCTTTTATTTCAGACAGCAGA
A_23_P55518	NM_005904	SMAD7	Hs.465087	4092	hs|18q21.1	GO:0000122(negative regulation of transcription from RNA polymerase II promoter)|GO:0001657(ureteric bud development)|GO:0003700(sequence-specific DNA binding transcription factor activity)|GO:0005515(protein binding)|GO:0005518(collagen binding)|GO:0005634(nucleus)|GO:0005654(nucleoplasm)|GO:0005667(transcription factor complex)|GO:0005737(cytoplasm)|GO:0005829(cytosol)|GO:0005886(plasma membran…	0.250374	0.51477	0.387666	0.551383	0.523779	0.52352	13.9585	16.2178	14.5263	16.4274	12.9337	11.0046	6	6	31.72	2.72e-08		SMAD family member 7	Homo sapiens SMAD family member 7 (SMAD7), transcript variant 1, mRNA [NM_005904]	ATCCTGTGTGTTAAGCTCTGCTATTAGGCCAGCAAGCGGGGATGTCCCTGGGAGGGACAT
A_23_P430658	NM_014571	HEYL	Hs.472566	26508	hs|1p34.3	GO:0000122(negative regulation of transcription from RNA polymerase II promoter)|GO:0000979(RNA polymerase II core promoter sequence-specific DNA binding)|GO:0000983(RNA polymerase II core promoter sequence-specific DNA binding transcription factor activity)|GO:0000988(protein binding transcription factor activity)|GO:0001077(RNA polymerase II core promoter proximal region sequence-specific DNA b…	0.0750112	0.0429908	0.0366203	0.018042	0.0256571	0.100486	1.16719	1.14371	1.47736	1.37409	1.20337	1.23367	0	6	30.02	3.75e-05		hes-related family bHLH transcription factor with YRPW motif-like	Homo sapiens hes-related family bHLH transcription factor with YRPW motif-like (HEYL), mRNA [NM_014571]	TGGTGTCTCCAACTCCTACCCCATTGCATGGGTTGTTGCGGACATCCAATAAAGATTTTT
A_33_P3246505	ENST00000375322	MAP3K8		1326	hs|10p11.23	GO:0000165(MAPK cascade)|GO:0000186(activation of MAPKK activity)|GO:0000287(magnesium ion binding)|GO:0004674(protein serine/threonine kinase activity)|GO:0004709(MAP kinase kinase kinase activity)|GO:0005515(protein binding)|GO:0005524(ATP binding)|GO:0005737(cytoplasm)|GO:0005829(cytosol)|GO:0006468(protein phosphorylation)|GO:0007049(cell cycle)|GO:0031295(T cell costimulation)	0.0471474	0.0326774	0.0241369	0.0878143	0.0756658	0.0610994	1.5918	1.76596	1.03001	1.58596	1.3791	1.54459	1	6	29.42	2.52e-06		mitogen-activated protein kinase kinase kinase 8	mitogen-activated protein kinase kinase kinase 8 [Source:HGNC Symbol;Acc:6860] [ENST00000375322]	GGCTGGCAGGCATGATTTTAAAAAATGTAATCATCAGTAAGAAGTACTTCCATGTTAAAG
A_23_P155848	NM_014421	DKK2	Hs.211869	27123	hs|4q25	GO:0005615(extracellular space)|GO:0007275(multicellular organismal development)|GO:0016055(Wnt receptor signaling pathway)|GO:0090090(negative regulation of canonical Wnt receptor signaling pathway)|GO:0090263(positive regulation of canonical Wnt receptor signaling pathway)	0.0398793	0.0258855	0.0356643	0.0472406	0.0273072	0.0255133	0.950846	0.960499	0.830887	0.949492	0.916417	0.847004	0	6	27.8	1.83e-07		dickkopf WNT signaling pathway inhibitor 2	Homo sapiens dickkopf WNT signaling pathway inhibitor 2 (DKK2), mRNA [NM_014421]	CAGCATCTGCTTTATTGCCAAAGGGCTAGTTTCGGTTTTCTGCAGCCATTGCGGTTAAAA
A_23_P53370	NM_014470	RND1	Hs.124940	27289	hs|12q13.12	GO:0003924(GTPase activity)|GO:0005102(receptor binding)|GO:0005515(protein binding)|GO:0005525(GTP binding)|GO:0005829(cytosol)|GO:0005856(cytoskeleton)|GO:0005886(plasma membrane)|GO:0005912(adherens junction)|GO:0006184(GTP catabolic process)|GO:0007015(actin filament organization)|GO:0007162(negative regulation of cell adhesion)|GO:0007264(small GTPase mediated signal transduction)|GO:0007411…	0.290289	0.299314	0.372665	0.311921	0.264923	0.343395	14.4429	3.20495	11.4009	5.89766	15.9619	7.74278	6	6	27.35	2.75e-05		Rho family GTPase 1	Homo sapiens Rho family GTPase 1 (RND1), mRNA [NM_014470]	CAGTCGCTCTGAACTCATCTCTTCTACCTTCAAGAAGGAAAAGGCCAAAAGCTGTTCCAT
A_23_P304897	NM_000623	BDKRB2	Hs.726620	624	hs|14q32.2	GO:0002020(protease binding)|GO:0004435(phosphatidylinositol phospholipase C activity)|GO:0004947(bradykinin receptor activity)|GO:0005515(protein binding)|GO:0005768(endosome)|GO:0005886(plasma membrane)|GO:0005887(integral to plasma membrane)|GO:0006939(smooth muscle contraction)|GO:0006954(inflammatory response)|GO:0007166(cell surface receptor signaling pathway)|GO:0007169(transmembrane recep…	0.0295637	0.0180222	0.0186347	0.013661	0.0220666	0.0582081	0.530327	0.630582	0.51945	0.66179	0.543455	0.788347	0	6	25.62	5.8e-06		bradykinin receptor B2	Homo sapiens bradykinin receptor B2 (BDKRB2), mRNA [NM_000623]	GCCCTATGCATGGTGTAGATGCCCTGATAAAGAACATCTGTCCTGTGAAAGACTCAATGA
A_23_P134854	NM_194284	CLDN23	Hs.183617	137075	hs|8p23.1	GO:0005198(structural molecule activity)|GO:0005886(plasma membrane)|GO:0005923(tight junction)|GO:0016021(integral to membrane)|GO:0016338(calcium-independent cell-cell adhesion)|GO:0034329(cell junction assembly)|GO:0042802(identical protein binding)|GO:0045216(cell-cell junction organization)|GO:0070830(tight junction assembly)	0.0282404	0.0481957	0.0347081	0.0853783	0.0213636	0.0207019	0.916786	0.959426	1.00013	1.01592	0.661048	0.849224	1	6	25.6	9.56e-06		claudin 23	Homo sapiens claudin 23 (CLDN23), mRNA [NM_194284]	GCATGCAAGAGTTTCTCTTCCAGAAGCCAAGAGGAGAACAAAGGTCCTAATGCTGTACTA
A_33_P3226832	NM_001993	F3	Hs.62192	2152	hs|1p21.3	GO:0001938(positive regulation of endothelial cell proliferation)|GO:0002020(protease binding)|GO:0002541(activation of plasma proteins involved in acute inflammatory response)|GO:0002543(activation of blood coagulation via clotting cascade)|GO:0005515(protein binding)|GO:0005543(phospholipid binding)|GO:0005615(extracellular space)|GO:0005886(plasma membrane)|GO:0006919(activation of cysteine-ty…	0.0661795	0.0765329	0.0583327	0.114172	0.192702	0.0256399	1.69715	2.3829	2.10547	1.44065	1.75734	2.13272	2	6	25.51	3.91e-05		coagulation factor III (thromboplastin, tissue factor)	Homo sapiens coagulation factor III (thromboplastin, tissue factor) (F3), transcript variant 1, mRNA [NM_001993]	CCTAATATGCTTTACAATCTGCACTTTAACTGACTTAAGTGGCATTAAACATTTGAGAGC
A_24_P355944	NM_004093	EFNB2	Hs.149239	1948	hs|13q33.3	GO:0001945(lymph vessel development)|GO:0002042(cell migration involved in sprouting angiogenesis)|GO:0005515(protein binding)|GO:0005886(plasma membrane)|GO:0005887(integral to plasma membrane)|GO:0007155(cell adhesion)|GO:0007267(cell-cell signaling)|GO:0007411(axon guidance)|GO:0009653(anatomical structure morphogenesis)|GO:0009887(organ morphogenesis)|GO:0010839(negative regulation of keratin…	1.20951	1.94058	1.77607	1.93297	1.93567	1.62245	42.0873	45.535	36.7094	37.2701	42.2596	43.0193	6	6	23.94	2.01e-09		ephrin-B2	Homo sapiens ephrin-B2 (EFNB2), mRNA [NM_004093]	TGCGTCTGTTTTGTGTCTGGTGCAGAATATGACAATCTACCAACTGTCCCTTTGTTTGAA
A_23_P25566	NM_004951	GPR183	Hs.784	1880	hs|13q32.3	GO:0002313(mature B cell differentiation involved in immune response)|GO:0004930(G-protein coupled receptor activity)|GO:0005886(plasma membrane)|GO:0005887(integral to plasma membrane)|GO:0006955(immune response)|GO:0006959(humoral immune response)|GO:0007186(G-protein coupled receptor signaling pathway)|GO:0008142(oxysterol binding)|GO:0030890(positive regulation of B cell proliferation)|GO:007…	0.0345224	0.0246822	0.0247669	0.0170642	0.0242219	0.0241259	0.528644	0.548407	0.728538	0.551609	0.541379	0.393614	0	6	22.15	2.53e-10		G protein-coupled receptor 183	Homo sapiens G protein-coupled receptor 183 (GPR183), mRNA [NM_004951]	CTGAAACGGCAAGTCAGTGTATCGATTTCTAGTGCTGTGAAGTCAGCCCCTGAAGAAAAT
A_33_P3299066	NM_006186	NR4A2	Hs.563344	4929	hs|2q24.1	GO:0001666(response to hypoxia)|GO:0001764(neuron migration)|GO:0001975(response to amphetamine)|GO:0003707(steroid hormone receptor activity)|GO:0004879(ligand-activated sequence-specific DNA binding RNA polymerase II transcription factor activity)|GO:0005515(protein binding)|GO:0005634(nucleus)|GO:0005654(nucleoplasm)|GO:0005737(cytoplasm)|GO:0006351(transcription, DNA-dependent)|GO:0006367(tra…	0.0981578	0.110328	0.108774	0.121809	0.08487	0.0721045	2.00281	2.2249	2.1455	2.35701	2.49532	1.81578	2	6	22.09	5.2e-10		nuclear receptor subfamily 4, group A, member 2	Homo sapiens nuclear receptor subfamily 4, group A, member 2 (NR4A2), mRNA [NM_006186]	GACTTGGTGCCACCGCCAGCAATAATTGACAAACTTTTCCTGGACACTTTACCTTTCTAA
A_23_P209449	NM_003507	FZD7	Hs.173859	8324	hs|2q33.1	GO:0001944(vasculature development)|GO:0004930(G-protein coupled receptor activity)|GO:0005109(frizzled binding)|GO:0005515(protein binding)|GO:0005737(cytoplasm)|GO:0005886(plasma membrane)|GO:0006355(regulation of transcription, DNA-dependent)|GO:0007199(G-protein coupled receptor signaling pathway coupled to cGMP nucleotide second messenger)|GO:0007223(Wnt receptor signaling pathway, calcium m…	0.136058	0.0245344	0.040505	0.0396118	0.029778	0.0249602	0.77249	0.780916	0.805292	1.07428	0.824545	0.975984	0	6	21.74	4.93e-05		frizzled class receptor 7	Homo sapiens frizzled class receptor 7 (FZD7), mRNA [NM_003507]	TTTTAAAACTCCAACACAGGTTTTGGCATCTTTTGTGCTGTATCTTTTAAGTGCATGTGA
A_24_P245379	NM_002575	SERPINB2	Hs.594481	5055	hs|18q21.33	GO:0004867(serine-type endopeptidase inhibitor activity)|GO:0005576(extracellular region)|GO:0005615(extracellular space)|GO:0005737(cytoplasm)|GO:0005886(plasma membrane)|GO:0007596(blood coagulation)|GO:0010951(negative regulation of endopeptidase activity)|GO:0030162(regulation of proteolysis)|GO:0042730(fibrinolysis)|GO:0043066(negative regulation of apoptotic process)	0.0274522	0.185884	0.205797	0.213684	0.170494	0.108857	2.66304	2.30384	3.16738	2.94242	2.88183	2.12263	5	6	20.93	0.000164		serpin peptidase inhibitor, clade B (ovalbumin), member 2	Homo sapiens serpin peptidase inhibitor, clade B (ovalbumin), member 2 (SERPINB2), transcript variant 2, mRNA [NM_002575]	AAGTTGAGGTATACATACCCCAGTTCAAATTAGAAGAGCATTATGAACTCAGATCCATTC
A_33_P3839897	DW419002	RNU4ATAC	Hs.689638	100151683	hs|2q14.2		0.063707	0.0469743	0.0326742	0.0379662	0.0441623	0.260449	1.25458	1.15451	1.13495	0.891437	1.23451	1.28722	1	6	19.47	0.000163		RNA, U4atac small nuclear (U12-dependent splicing)	HHAGE001732 Human liver regeneration after partial hepatectomy Homo sapiens cDNA, mRNA sequence [DW419002]	TGTAACTTCCTTATGCTGAGTCGGCCCAGTAGTCTAGGTCAAGTTTCAATAGGAGACGAA
A_23_P106194	NM_005252	FOS	Hs.25647	2353	hs|14q24.3	GO:0001661(conditioned taste aversion)|GO:0002224(toll-like receptor signaling pathway)|GO:0002755(MyD88-dependent toll-like receptor signaling pathway)|GO:0002756(MyD88-independent toll-like receptor signaling pathway)|GO:0003690(double-stranded DNA binding)|GO:0003700(sequence-specific DNA binding transcription factor activity)|GO:0005515(protein binding)|GO:0005634(nucleus)|GO:0005654(nucleopl…	0.0583695	0.128219	0.121692	0.144175	0.0456262	0.106854	1.59235	1.58155	1.97728	1.73668	1.67901	1.73083	3	6	18.44	1.57e-05		FBJ murine osteosarcoma viral oncogene homolog	Homo sapiens FBJ murine osteosarcoma viral oncogene homolog (FOS), mRNA [NM_005252]	AGAGGGTTCCTGTAGACCTAGGGAGGACCTTATCTGTGCGTGAAACACACCAGGCTGTGG
A_33_P3391796	NM_005450	NOG	Hs.248201	9241	hs|17q22	GO:0000122(negative regulation of transcription from RNA polymerase II promoter)|GO:0001501(skeletal system development)|GO:0001649(osteoblast differentiation)|GO:0001701(in utero embryonic development)|GO:0001706(endoderm formation)|GO:0001707(mesoderm formation)|GO:0001837(epithelial to mesenchymal transition)|GO:0001839(neural plate morphogenesis)|GO:0001843(neural tube closure)|GO:0005515(pro…	0.499545	0.258798	0.245811	0.140584	0.241776	0.329128	5.55887	4.02794	4.63003	3.24082	6.56961	4.48539	6	6	17.41	4.37e-07		noggin	Homo sapiens noggin (NOG), mRNA [NM_005450]	GCACTGTTTAACTGTGTAGGAATGTATATGTGTGTGTATATACGGTCCCAGTTTTAATTT
A_23_P209625	NM_000104	CYP1B1	Hs.154654	1545	hs|2p22.2	GO:0001525(angiogenesis)|GO:0002930(trabecular meshwork development)|GO:0004497(monooxygenase activity)|GO:0005506(iron ion binding)|GO:0005739(mitochondrion)|GO:0005789(endoplasmic reticulum membrane)|GO:0006725(cellular aromatic compound metabolic process)|GO:0006805(xenobiotic metabolic process)|GO:0006809(nitric oxide biosynthetic process)|GO:0007155(cell adhesion)|GO:0007601(visual perceptio…	0.0366484	0.104449	0.0482063	0.023673	0.0269493	0.0908714	0.867691	0.982715	0.710106	0.850341	0.755362	0.724799	0	6	17.25	6.45e-05		cytochrome P450, family 1, subfamily B, polypeptide 1	Homo sapiens cytochrome P450, family 1, subfamily B, polypeptide 1 (CYP1B1), mRNA [NM_000104]	CTGTGTTTATATGGAAGAAAGTAAGGTGCTTGGAGTTTACCTGGCTTATTTAATATGCTT
A_23_P46936	NM_000399	EGR2	Hs.1395	1959	hs|10q21.3	GO:0001102(RNA polymerase II activating transcription factor binding)|GO:0003682(chromatin binding)|GO:0003700(sequence-specific DNA binding transcription factor activity)|GO:0005515(protein binding)|GO:0005634(nucleus)|GO:0005737(cytoplasm)|GO:0006366(transcription from RNA polymerase II promoter)|GO:0006611(protein export from nucleus)|GO:0007420(brain development)|GO:0007422(peripheral nervous…	0.0553725	0.019075	0.0309345	0.0526058	0.0242022	0.0249278	0.453596	0.543056	0.563028	0.510719	0.58044	0.545886	0	6	16.69	1.11e-05		early growth response 2	Homo sapiens early growth response 2 (EGR2), transcript variant 1, mRNA [NM_000399]	AAGAATGTACATAATGTTACCGGAGCTGATTTGTTTGGTCATTAGCTCTTAATAGTTGTG
A_23_P52336	NM_170744	UNC5B	Hs.522997	219699	hs|10q22.1	GO:0005515(protein binding)|GO:0006915(apoptotic process)|GO:0007165(signal transduction)|GO:0007411(axon guidance)|GO:0014068(positive regulation of phosphatidylinositol 3-kinase cascade)|GO:0016021(integral to membrane)|GO:0033564(anterior/posterior axon guidance)|GO:0042981(regulation of apoptotic process)|GO:0043065(positive regulation of apoptotic process)|GO:0043524(negative regulation of n…	0.111866	0.101161	0.0997511	0.100435	0.0936187	0.108832	1.57509	1.86258	1.77765	1.67909	1.76185	1.35401	3	6	16.2	2.96e-11		unc-5 homolog B (C. elegans)	Homo sapiens unc-5 homolog B (C. elegans) (UNC5B), transcript variant 1, mRNA [NM_170744]	AAACCACAAGGGAAAAGAAAAACCCAGTTTCTTAGGAAACGCAAACGATTTATTATCCAG
A_33_P3390013	NM_006988	ADAMTS1	Hs.643357	9510	hs|21q21.3	GO:0001542(ovulation from ovarian follicle)|GO:0001822(kidney development)|GO:0004222(metalloendopeptidase activity)|GO:0005604(basement membrane)|GO:0005737(cytoplasm)|GO:0006508(proteolysis)|GO:0007229(integrin-mediated signaling pathway)|GO:0008201(heparin binding)|GO:0008237(metallopeptidase activity)|GO:0008270(zinc ion binding)|GO:0008285(negative regulation of cell proliferation)|GO:003141…	0.109998	0.151399	0.159464	0.198868	0.145927	0.215763	2.53816	2.85943	2.84025	2.81224	2.48514	2.03145	4	6	16.13	1.15e-08		ADAM metallopeptidase with thrombospondin type 1 motif, 1	Homo sapiens ADAM metallopeptidase with thrombospondin type 1 motif, 1 (ADAMTS1), mRNA [NM_006988]	GTGATCCTTTAAAGAAACCTAAACATTTCATAGACTTTTGCACAATGGCAGAATGCAGTT
A_24_P227927	NM_181078	IL21R	Hs.210546	50615	hs|16p12.1	GO:0001532(interleukin-21 receptor activity)|GO:0016021(integral to membrane)|GO:0030101(natural killer cell activation)|GO:0038114(interleukin-21-mediated signaling pathway)	0.0379619	0.0249048	0.0266483	0.0206714	0.0332883	0.0467979	0.477074	0.367204	0.385067	0.640191	0.513875	0.605062	0	6	15.96	1.44e-08		interleukin 21 receptor	Homo sapiens interleukin 21 receptor (IL21R), transcript variant 2, mRNA [NM_181078]	GGAAATTGGCGATGTCACCCGTGTACGGTACGCAGCCCAGAGCAGACCCTCAATAAACGT
A_24_P122137	NM_002309	LIF	Hs.2250	3976	hs|22q12.2	GO:0001135(RNA polymerase II transcription factor recruiting transcription factor activity)|GO:0001974(blood vessel remodeling)|GO:0005102(receptor binding)|GO:0005125(cytokine activity)|GO:0005146(leukemia inhibitory factor receptor binding)|GO:0005615(extracellular space)|GO:0005737(cytoplasm)|GO:0006366(transcription from RNA polymerase II promoter)|GO:0006955(immune response)|GO:0007275(multi…	0.0679923	0.0754204	0.0798533	0.0811204	0.0630654	0.0390595	0.869425	0.955	1.06759	1.17616	1.01339	1.14428	0	6	15.66	1.42e-07		leukemia inhibitory factor	Homo sapiens leukemia inhibitory factor (LIF), transcript variant 1, mRNA [NM_002309]	CATTTCCCTGCAGATGGTACAGATGTTCCTGCCTTAGAGTCATCTCTAGTTCCCCACCTC
A_24_P269779	NM_004273	CHST3	Hs.158304	9469	hs|10q22.1	GO:0000139(Golgi membrane)|GO:0005975(carbohydrate metabolic process)|GO:0006790(sulfur compound metabolic process)|GO:0008146(sulfotransferase activity)|GO:0008459(chondroitin 6-sulfotransferase activity)|GO:0016021(integral to membrane)|GO:0030203(glycosaminoglycan metabolic process)|GO:0030204(chondroitin sulfate metabolic process)|GO:0030206(chondroitin sulfate biosynthetic process)|GO:004302…	0.234516	0.25537	0.153831	0.609663	0.288361	0.383254	4.06724	4.47633	4.85859	4.89211	3.96959	4.10046	5	6	14.99	1.97e-05		carbohydrate (chondroitin 6) sulfotransferase 3	Homo sapiens carbohydrate (chondroitin 6) sulfotransferase 3 (CHST3), mRNA [NM_004273]	GTGGAAGCTGCTCTTTACCTCAAAAGCACAAAGCAGAATTGGCAACTTCACATGTCTCGA
A_23_P301942	NM_024409	NPPC	Hs.627236	4880	hs|2q37.1	GO:0001503(ossification)|GO:0001666(response to hypoxia)|GO:0003418(growth plate cartilage chondrocyte differentiation)|GO:0003419(growth plate cartilage chondrocyte proliferation)|GO:0005102(receptor binding)|GO:0005179(hormone activity)|GO:0005615(extracellular space)|GO:0006182(cGMP biosynthetic process)|GO:0007168(receptor guanylyl cyclase signaling pathway)|GO:0008285(negative regulation of …	0.0317064	0.0201831	0.02185	0.0153672	0.0255847	0.0258644	0.355108	0.33427	0.252472	0.313424	0.396986	0.274294	0	6	13.89	7.23e-09		natriuretic peptide C	Homo sapiens natriuretic peptide C (NPPC), mRNA [NM_024409]	TGCAAGAGCACCCCAACGCGCGCAAATACAAAGGAGCCAACAAGAAGGGCTTGTCCAAGG
A_23_P65518	NM_016651	DACT1	Hs.48950	51339	hs|14q23.1	GO:0000122(negative regulation of transcription from RNA polymerase II promoter)|GO:0001702(gastrulation with mouth forming second)|GO:0005080(protein kinase C binding)|GO:0005515(protein binding)|GO:0005634(nucleus)|GO:0005730(nucleolus)|GO:0005737(cytoplasm)|GO:0008013(beta-catenin binding)|GO:0016055(Wnt receptor signaling pathway)|GO:0030054(cell junction)|GO:0030177(positive regulation of Wn…	0.123625	0.071279	0.0297212	0.0207998	0.0376557	0.0953898	0.573609	0.724522	0.713195	0.790049	0.755915	0.611179	0	6	13.3	0.00022		dishevelled-binding antagonist of beta-catenin 1	Homo sapiens dishevelled-binding antagonist of beta-catenin 1 (DACT1), transcript variant 1, mRNA [NM_016651]	ACCGAAGCGTTGACCTGAACATATTAGTGCAATCCAGTCCAGATTGGACCTTTGATCCTA
A_33_P3324206	NM_005144	HR	Hs.272367	55806	hs|8p21.3	GO:0003677(DNA binding)|GO:0003700(sequence-specific DNA binding transcription factor activity)|GO:0003714(transcription corepressor activity)|GO:0005634(nucleus)|GO:0006351(transcription, DNA-dependent)|GO:0006355(regulation of transcription, DNA-dependent)|GO:0016491(oxidoreductase activity)|GO:0016604(nuclear body)|GO:0045892(negative regulation of transcription, DNA-dependent)|GO:0046872(meta…	0.112121	0.0870725	0.0790526	0.0286523	0.0469549	0.090544	0.830915	0.815234	0.81901	0.897504	0.797097	0.955526	0	6	12.62	5.41e-05		hair growth associated	Homo sapiens hair growth associated (HR), transcript variant 1, mRNA [NM_005144]	GAAAAACACTCCCACTCTTGTCATACCTAATTGTTCCTGCTGTGGTTTGGGGAATTTTTT
A_23_P56328	NM_031310	PLVAP	Hs.107125	83483	hs|19p13.11	GO:0000165(MAPK cascade)|GO:0002693(positive regulation of cellular extravasation)|GO:0005515(protein binding)|GO:0005901(caveola)|GO:0009986(cell surface)|GO:0016021(integral to membrane)|GO:0033209(tumor necrosis factor-mediated signaling pathway)|GO:0042803(protein homodimerization activity)|GO:0048471(perinuclear region of cytoplasm)|GO:0070528(protein kinase C signaling cascade)	0.508319	0.222616	0.242659	0.175852	0.236608	0.361294	4.4353	1.71724	4.05329	3.21991	5.09409	3.30065	6	6	12.62	4.5e-07		plasmalemma vesicle associated protein	Homo sapiens plasmalemma vesicle associated protein (PLVAP), mRNA [NM_031310]	CACAGTGACAACACACACCATGACAACGACACCTATAGATATGGCACCAACATCACATGC
A_21_P0000024	NM_001160031	FLT1	Hs.594454	2321	hs|13q12.3	GO:0001569(patterning of blood vessels)|GO:0002040(sprouting angiogenesis)|GO:0002548(monocyte chemotaxis)|GO:0004714(transmembrane receptor protein tyrosine kinase activity)|GO:0005021(vascular endothelial growth factor-activated receptor activity)|GO:0005515(protein binding)|GO:0005524(ATP binding)|GO:0005615(extracellular space)|GO:0005768(endosome)|GO:0005886(plasma membrane)|GO:0005887(integ…	0.467752	0.677521	0.699593	0.790613	0.707017	0.693755	7.58537	7.37456	8.84434	8.88691	8.21644	7.67803	6	6	12.16	1.09e-08		fms-related tyrosine kinase 1	Homo sapiens fms-related tyrosine kinase 1 (FLT1), transcript variant 4, mRNA [NM_001160031]	TGACAGCAACATGGGAAACAGAATTGAGAGCATCACTCAGCGCATGGCAATAATAGAAGG
A_23_P209246	NM_005270	GLI2	Hs.111867	2736	hs|2q14.2	GO:0000122(negative regulation of transcription from RNA polymerase II promoter)|GO:0001501(skeletal system development)|GO:0001649(osteoblast differentiation)|GO:0001701(in utero embryonic development)|GO:0001822(kidney development)|GO:0002062(chondrocyte differentiation)|GO:0002076(osteoblast development)|GO:0003682(chromatin binding)|GO:0003700(sequence-specific DNA binding transcription facto…	0.0454641	0.0402884	0.0510517	0.0166925	0.0288985	0.0236803	0.254394	0.356011	0.412488	0.488901	0.355451	0.447881	0	6	11.82	2.35e-06		GLI family zinc finger 2	Homo sapiens GLI family zinc finger 2 (GLI2), mRNA [NM_005270]	ACTCAGAGTGTGACTCTGACTGTGACCTTGGCCTTAATGAGGAACTTCTTAGGAGAGTTT
A_24_P655849	NM_001127217	SMAD9	Hs.123119	4093	hs|13q13.3	GO:0001657(ureteric bud development)|GO:0001666(response to hypoxia)|GO:0001880(Mullerian duct regression)|GO:0003677(DNA binding)|GO:0003700(sequence-specific DNA binding transcription factor activity)|GO:0005515(protein binding)|GO:0005622(intracellular)|GO:0005634(nucleus)|GO:0005654(nucleoplasm)|GO:0005667(transcription factor complex)|GO:0005829(cytosol)|GO:0006351(transcription, DNA-depende…	0.0356748	0.205529	0.162565	0.282232	0.0793391	0.133133	1.79768	1.24056	1.67653	1.86077	1.40388	0.860384	4	6	11.54	0.000196		SMAD family member 9	Homo sapiens SMAD family member 9 (SMAD9), transcript variant a, mRNA [NM_001127217]	GCTAGATGATATTTTAATAGCTGCGAGTGCTTTGGAACTATAAAGATGTCACTACTTAAC
A_23_P321223	NM_002674	PMCH	Hs.707990	5367	hs|12q23.2	GO:0005576(extracellular region)|GO:0005634(nucleus)|GO:0007218(neuropeptide signaling pathway)|GO:0007268(synaptic transmission)|GO:0007275(multicellular organismal development)|GO:0007283(spermatogenesis)|GO:0007631(feeding behavior)|GO:0030154(cell differentiation)|GO:0030354(melanin-concentrating hormone activity)	0.368084	0.332798	0.292127	0.218547	0.310333	0.308495	3.46288	3.75738	2.94099	3.98909	3.05412	3.55093	6	6	11.41	7.27e-10		pro-melanin-concentrating hormone	Homo sapiens pro-melanin-concentrating hormone (PMCH), mRNA [NM_002674]	AGAAAATAAAAGCATTTAATTGCCAATGGGAGGAGAAGCCCATACTGCTACTATAACTTG
A_33_P3371727	ENST00000379253	SAT1	Hs.28491	6303	hs|Xp22.11	GO:0001525(angiogenesis)|GO:0004145(diamine N-acetyltransferase activity)|GO:0005515(protein binding)|GO:0005622(intracellular)|GO:0005829(cytosol)|GO:0006595(polyamine metabolic process)|GO:0006596(polyamine biosynthetic process)|GO:0009447(putrescine catabolic process)|GO:0019809(spermidine binding)|GO:0032918(spermidine acetylation)|GO:0034641(cellular nitrogen compound metabolic process)|GO:0…	0.138679	0.466065	0.553248	0.754777	0.434684	0.319531	4.93951	3.92884	5.14651	4.85453	5.16589	3.29542	5	6	11.41	6.99e-05		spermidine/spermine N1-acetyltransferase 1	spermidine/spermine N1-acetyltransferase 1 [Source:HGNC Symbol;Acc:10540] [ENST00000379253]	GCTGTGGAGACCCGGAAGAGTTAGATATAATGTCATTTGTTGTAATTCAGTTTCATAAAA
A_24_P262127	NM_004165	RRAD	Hs.1027	6236	hs|16q22.1	GO:0003924(GTPase activity)|GO:0005515(protein binding)|GO:0005516(calmodulin binding)|GO:0005525(GTP binding)|GO:0005886(plasma membrane)|GO:0006184(GTP catabolic process)|GO:0007264(small GTPase mediated signal transduction)	0.105254	0.032422	0.0270435	0.0400873	0.0451689	0.031262	0.43388	0.338117	0.549858	0.433959	0.70277	0.385627	0	6	11.05	7.7e-06		Ras-related associated with diabetes	Homo sapiens Ras-related associated with diabetes (RRAD), transcript variant 2, mRNA [NM_004165]	CTTTGACTGCAAGTTCATTGAGACATCAGCGGCATTGCACCACAATGTCCAGGCGCTGTT
A_24_P152188	NM_198859	PRICKLE2	Hs.148105	166336	hs|3p14.1	GO:0005737(cytoplasm)|GO:0008270(zinc ion binding)|GO:0016327(apicolateral plasma membrane)|GO:0016328(lateral plasma membrane)|GO:0031175(neuron projection development)|GO:0031965(nuclear membrane)|GO:0045197(establishment or maintenance of epithelial cell apical/basal polarity)	0.484337	0.411154	0.573178	0.739908	0.669636	0.657842	5.7926	6.01718	5.48756	5.77429	5.79399	6.87016	6	6	10.28	2.27e-07		prickle homolog 2 (Drosophila)	Homo sapiens prickle homolog 2 (Drosophila) (PRICKLE2), mRNA [NM_198859]	ACCAGTAAGGTCTGTTCTTAAACCTACCTAGTTGATTTTCATATCTTTCCATAAAGTGTC
A_23_P83298	NM_016307	PRRX2	Hs.660115	51450	hs|9q34.11	GO:0002053(positive regulation of mesenchymal cell proliferation)|GO:0003700(sequence-specific DNA binding transcription factor activity)|GO:0005634(nucleus)|GO:0006355(regulation of transcription, DNA-dependent)|GO:0030326(embryonic limb morphogenesis)|GO:0042472(inner ear morphogenesis)|GO:0042474(middle ear morphogenesis)|GO:0043565(sequence-specific DNA binding)|GO:0045880(positive regulation…	0.0329682	0.0217221	0.0231802	0.0180477	0.0235545	0.0224413	0.238055	0.281481	0.194944	0.262099	0.241437	0.210211	0	4	10.16	2.26e-09		paired related homeobox 2	Homo sapiens paired related homeobox 2 (PRRX2), mRNA [NM_016307]	CAAGGACCTCATTTAGTTTGTGTATTAAAACCAAAAAGCTTTTGTCTTTAAGAAATAAAA
A_23_P35414	NM_005398	PPP1R3C	Hs.303090	5507	hs|10q23.32	GO:0004722(protein serine/threonine phosphatase activity)|GO:0005515(protein binding)|GO:0005829(cytosol)|GO:0005975(carbohydrate metabolic process)|GO:0005978(glycogen biosynthetic process)|GO:0006006(glucose metabolic process)|GO:0016311(dephosphorylation)|GO:0019903(protein phosphatase binding)|GO:0044281(small molecule metabolic process)	0.498488	0.269154	0.192051	0.200386	0.253443	0.313714	2.34807	2.8547	2.35477	2.77565	2.52522	2.76958	6	6	9.524	8.27e-06		protein phosphatase 1, regulatory subunit 3C	Homo sapiens protein phosphatase 1, regulatory subunit 3C (PPP1R3C), mRNA [NM_005398]	AGCATCCATACTTTTCTACTGTAAATATTTCACTCTCCTCTAGCTATCCTTGATGAGCTT
A_33_P3220470	NM_005585	SMAD6	Hs.153863	4091	hs|15q22.31	GO:0001657(ureteric bud development)|GO:0003682(chromatin binding)|GO:0003700(sequence-specific DNA binding transcription factor activity)|GO:0005515(protein binding)|GO:0005634(nucleus)|GO:0005667(transcription factor complex)|GO:0005737(cytoplasm)|GO:0005829(cytosol)|GO:0006351(transcription, DNA-dependent)|GO:0006955(immune response)|GO:0007179(transforming growth factor beta receptor signalin…	7.78747	5.31759	3.44566	4.26557	4.70832	5.1726	52.7134	55.42	49.1773	37.8912	39.1352	48.2823	6	6	9.409	1.15e-07		SMAD family member 6	Homo sapiens SMAD family member 6 (SMAD6), transcript variant 1, mRNA [NM_005585]	GAGATATTAATGCCCAGACAAAAAGCTAATACCAGTCACTCGATAATAAAGTATTCGCAT
A_23_P133408	NM_000758	CSF2	Hs.1349	1437	hs|5q31.1	GO:0001892(embryonic placenta development)|GO:0005125(cytokine activity)|GO:0005129(granulocyte macrophage colony-stimulating factor receptor binding)|GO:0005515(protein binding)|GO:0005576(extracellular region)|GO:0005615(extracellular space)|GO:0006955(immune response)|GO:0008083(growth factor activity)|GO:0008284(positive regulation of cell proliferation)|GO:0010628(positive regulation of gene…	0.0702683	0.104281	0.0625875	0.080891	0.0841862	0.096071	0.714119	0.543111	0.963031	1.0331	0.678249	0.768543	0	6	9.355	1.05e-08		colony stimulating factor 2 (granulocyte-macrophage)	Homo sapiens colony stimulating factor 2 (granulocyte-macrophage) (CSF2), mRNA [NM_000758]	AACCCAGATTATCACCTTTGAAAGTTTCAAAGAGAACCTGAAGGACTTTCTGCTTGTCAT
A_23_P166400	NM_006477	RASL10A	Hs.73088	10633	hs|22q12.2	GO:0003924(GTPase activity)|GO:0005525(GTP binding)|GO:0005730(nucleolus)|GO:0005886(plasma membrane)|GO:0006184(GTP catabolic process)|GO:0007264(small GTPase mediated signal transduction)	0.632299	0.441181	0.325451	0.357324	0.431243	0.401333	3.91142	4.27566	4.2968	4.16631	3.6126	3.47169	6	6	9.351	2.2e-07		RAS-like, family 10, member A	Homo sapiens RAS-like, family 10, member A (RASL10A), mRNA [NM_006477]	AAAGGACTTGGCTATGAACTTGACTGGAAACACGCAGCCTGCTCCTGGAGCTTCACTGGA
A_24_P125469	NM_006033	LIPG	Hs.465102	9388	hs|18q21.1	GO:0004465(lipoprotein lipase activity)|GO:0004620(phospholipase activity)|GO:0005615(extracellular space)|GO:0006629(lipid metabolic process)|GO:0007584(response to nutrient)|GO:0008201(heparin binding)|GO:0008283(cell proliferation)|GO:0008970(phosphatidylcholine 1-acylhydrolase activity)|GO:0009395(phospholipid catabolic process)|GO:0010983(positive regulation of high-density lipoprotein parti…	0.911784	1.59131	1.53137	1.44747	1.22656	1.07397	11.7009	11.9986	12.0914	12.6931	10.7326	11.1633	6	6	9.208	5.83e-07		lipase, endothelial	Homo sapiens lipase, endothelial (LIPG), mRNA [NM_006033]	TATAGAGCCATCCATAAAATCCTAAGCCCTTTTATTAATGTATAACCAGGAGAACATCTG
A_19_P00315506	NM_001162893	KIAA0040	Hs.518138	9674	hs|1q25.1		0.380274	0.256942	0.336688	0.218878	0.242034	0.285083	2.28071	2.39222	2.72369	2.82127	2.37773	3.0313	6	6	9.205	2.21e-08		KIAA0040	Homo sapiens KIAA0040 (KIAA0040), transcript variant 1, mRNA [NM_001162893]	CAATGGATTCCATGTTTCTTTTTCTTGGGGGGAGCAGGGAGGGAGAAAGGTAGAAAAATG
A_33_P3401826	NM_207315	CMPK2	Hs.7155	129607	hs|2p25.2	GO:0004127(cytidylate kinase activity)|GO:0004550(nucleoside diphosphate kinase activity)|GO:0004798(thymidylate kinase activity)|GO:0005524(ATP binding)|GO:0005634(nucleus)|GO:0005730(nucleolus)|GO:0005739(mitochondrion)|GO:0006165(nucleoside diphosphate phosphorylation)|GO:0006227(dUDP biosynthetic process)|GO:0006233(dTDP biosynthetic process)|GO:0009142(nucleoside triphosphate biosynthetic pr…	0.10519	0.0682534	0.0737944	0.0425423	0.0976049	0.0467404	0.594124	0.707918	0.601329	0.652887	0.600146	0.592242	0	6	9.108	1.73e-05		cytidine monophosphate (UMP-CMP) kinase 2, mitochondrial	Homo sapiens cytidine monophosphate (UMP-CMP) kinase 2, mitochondrial (CMPK2), transcript variant 1, mRNA [NM_207315]	GGCAGCCTAGAAAAACAAACAATTAATGTATCTTTATGTCCCTGGCACATGAATAAACTT
A_23_P10206	NM_005328	HAS2	Hs.159226	3037	hs|8q24.13	GO:0001570(vasculogenesis)|GO:0001822(kidney development)|GO:0005887(integral to plasma membrane)|GO:0008284(positive regulation of cell proliferation)|GO:0030213(hyaluronan biosynthetic process)|GO:0030335(positive regulation of cell migration)|GO:0035810(positive regulation of urine volume)|GO:0036120(cellular response to platelet-derived growth factor stimulus)|GO:0045226(extracellular polysac…	0.0578739	0.0330235	0.0444612	0.030903	0.0373661	0.0397567	0.308029	0.345386	0.346917	0.37508	0.372595	0.414256	0	6	9.045	1.3e-07		hyaluronan synthase 2	Homo sapiens hyaluronan synthase 2 (HAS2), mRNA [NM_005328]	ATTTCTATGAAAATGGGATGAATTCTTTGTTTATGCACTTTTTCCTTACTGTGCATCCGC
A_23_P152002	NM_004049	BCL2A1	Hs.227817	597	hs|15q25.1	GO:0005515(protein binding)|GO:0005741(mitochondrial outer membrane)|GO:0008630(DNA damage response, signal transduction resulting in induction of apoptosis)|GO:0042803(protein homodimerization activity)|GO:0043066(negative regulation of apoptotic process)|GO:0046982(protein heterodimerization activity)|GO:0051400(BH domain binding)|GO:0097192(extrinsic apoptotic signaling pathway in absence of l…	0.107721	0.151912	0.136944	0.284837	0.262917	0.30366	1.15063	1.45678	1.88908	2.84734	1.55616	1.95556	5	6	9.02	3.61e-06		BCL2-related protein A1	Homo sapiens BCL2-related protein A1 (BCL2A1), transcript variant 1, mRNA [NM_004049]	TGTAACCATATTTGCATTTGAAGGTATTCTCATCAAGAAACTTCTACGACAGCAAATTGC
A_32_P456318	NM_080743	SRSF12	Hs.254414	135295	hs|6q15	GO:0000166(nucleotide binding)|GO:0000244(assembly of spliceosomal tri-snRNP)|GO:0000381(regulation of alternative nuclear mRNA splicing, via spliceosome)|GO:0000395(nuclear mRNA 5'-splice site recognition)|GO:0003723(RNA binding)|GO:0005654(nucleoplasm)|GO:0016482(cytoplasmic transport)|GO:0048025(negative regulation of nuclear mRNA splicing, via spliceosome)|GO:0050733(RS domain binding)|GO:005…	0.0400731	0.0536078	0.0320919	0.0196796	0.0281567	0.0272831	0.268212	0.212375	0.313026	0.309841	0.401425	0.213291	0	5	8.766	4.99e-07		serine/arginine-rich splicing factor 12	Homo sapiens serine/arginine-rich splicing factor 12 (SRSF12), mRNA [NM_080743]	ATTGTCTTCTGGGAATATCTATATTCCAGGGTTCACTTTTGTCATAGAATTGTTTCTTGG
A_23_P257043	NM_005261	GEM	Hs.654463	2669	hs|8q22.1	GO:0000287(magnesium ion binding)|GO:0003924(GTPase activity)|GO:0005515(protein binding)|GO:0005516(calmodulin binding)|GO:0005525(GTP binding)|GO:0005634(nucleus)|GO:0006184(GTP catabolic process)|GO:0006955(immune response)|GO:0007067(mitosis)|GO:0007165(signal transduction)|GO:0007166(cell surface receptor signaling pathway)|GO:0007264(small GTPase mediated signal transduction)|GO:0009898(int…	0.374223	0.446769	0.361913	0.571049	0.44941	0.417206	3.19314	3.33688	3.93154	4.18389	3.88203	4.30532	6	6	8.761	5.84e-10		GTP binding protein overexpressed in skeletal muscle	Homo sapiens GTP binding protein overexpressed in skeletal muscle (GEM), transcript variant 1, mRNA [NM_005261]	GGACCTTGCTGGAAACAAAGGCTTAGCAAACAATTTTTGTTCAATGCCCACCAAGACATA
A_24_P376129	ENST00000374057	DFNB31	Hs.93836	25861	hs|9q32	GO:0001895(retina homeostasis)|GO:0002142(stereocilia ankle link complex)|GO:0005515(protein binding)|GO:0005737(cytoplasm)|GO:0005884(actin filament)|GO:0005929(cilium)|GO:0007605(sensory perception of sound)|GO:0030426(growth cone)|GO:0032420(stereocilium)|GO:0050953(sensory perception of light stimulus)|GO:0060122(inner ear receptor stereocilium organization)	0.0348742	0.0216588	0.0231161	0.0162669	0.0232926	0.0757613	0.312964	0.248786	0.304157	0.268658	0.130782	0.266785	0	5	8.731	2.74e-05		deafness, autosomal recessive 31	deafness, autosomal recessive 31 [Source:HGNC Symbol;Acc:16361] [ENST00000374057]	TGTGTAGTGTATGTTATAATACAGGCTAAGCTGCCACAATAAAAGAGCTTAAATACTGTG
A_23_P32233	NM_004235	KLF4	Hs.376206	9314	hs|9q31.2	GO:0000122(negative regulation of transcription from RNA polymerase II promoter)|GO:0000790(nuclear chromatin)|GO:0000987(core promoter proximal region sequence-specific DNA binding)|GO:0001010(sequence-specific DNA binding transcription factor recruiting transcription factor activity)|GO:0001077(RNA polymerase II core promoter proximal region sequence-specific DNA binding transcription factor ac…	0.0430646	0.188929	0.179506	0.245964	0.331441	0.267295	1.41836	1.7692	1.7815	2.02031	1.28623	1.17717	5	6	8.687	0.000494		Kruppel-like factor 4 (gut)	Homo sapiens Kruppel-like factor 4 (gut) (KLF4), mRNA [NM_004235]	CGTTCCAGTGCCAAAAATGCGACCGAGCATTTTCCAGGTCGGACCACCTCGCCTTACACA
A_24_P225616	NM_001034	RRM2	Hs.226390	6241	hs|2p25.1	GO:0000082(G1/S transition of mitotic cell cycle)|GO:0000083(regulation of transcription involved in G1/S phase of mitotic cell cycle)|GO:0000278(mitotic cell cycle)|GO:0004748(ribonucleoside-diphosphate reductase activity, thioredoxin disulfide as acceptor)|GO:0005515(protein binding)|GO:0005634(nucleus)|GO:0005654(nucleoplasm)|GO:0005737(cytoplasm)|GO:0005829(cytosol)|GO:0006260(DNA replication…	0.12068	0.621741	0.629666	0.678511	0.596955	0.480528	3.40428	3.66945	4.43352	3.66193	5.21861	3.64148	5	6	8.651	0.000343		ribonucleotide reductase M2	Homo sapiens ribonucleotide reductase M2 (RRM2), transcript variant 2, mRNA [NM_001034]	GGTTCCTACAAGTTGTTCATTCTAGTTTTGTTTGGTGTAAGTAGGTTGTGTGAGTTAATT
A_33_P3215392	NM_138568	EXOC3L2	Hs.337557	90332	hs|19q13.32	GO:0000145(exocyst)|GO:0003674(molecular_function)|GO:0005575(cellular_component)|GO:0006887(exocytosis)|GO:0008150(biological_process)	0.0546322	0.0725662	0.0750634	0.0586269	0.0982754	0.0940677	0.652084	0.531432	0.77432	0.618224	0.548429	0.72339	0	6	8.612	3.89e-08		exocyst complex component 3-like 2	Homo sapiens exocyst complex component 3-like 2 (EXOC3L2), mRNA [NM_138568]	ACCCCTGGGATAGAAAGACCCTTAGATGTCTTCTCACGCAACCCCAAACTCCCTGTACAG
A_33_P3368358	NM_182966	NEDD9	Hs.37982	4739	hs|6p24.2	GO:0000922(spindle pole)|GO:0005515(protein binding)|GO:0005634(nucleus)|GO:0005737(cytoplasm)|GO:0005794(Golgi apparatus)|GO:0005819(spindle)|GO:0005925(focal adhesion)|GO:0005938(cell cortex)|GO:0007010(cytoskeleton organization)|GO:0007067(mitosis)|GO:0007155(cell adhesion)|GO:0007165(signal transduction)|GO:0007229(integrin-mediated signaling pathway)|GO:0030027(lamellipodium)|GO:0040008(regu…	0.917457	0.650954	0.758133	0.472533	0.688121	0.75425	5.33777	6.56512	6.89466	5.82815	5.36778	5.83954	6	6	8.575	9.57e-08		neural precursor cell expressed, developmentally down-regulated 9	Homo sapiens neural precursor cell expressed, developmentally down-regulated 9 (NEDD9), transcript variant 2, mRNA [NM_182966]	CAGAGAGATGGGCAAGTGTCCTATTTCTTAGTGAGAGCCTCTAAACAAACCAGCTTGTGA
A_23_P419641	NM_019074	DLL4	Hs.511076	54567	hs|15q15.1	GO:0000122(negative regulation of transcription from RNA polymerase II promoter)|GO:0001525(angiogenesis)|GO:0001569(patterning of blood vessels)|GO:0001974(blood vessel remodeling)|GO:0003208(cardiac ventricle morphogenesis)|GO:0003209(cardiac atrium morphogenesis)|GO:0003222(ventricular trabecula myocardium morphogenesis)|GO:0003344(pericardium morphogenesis)|GO:0005112(Notch binding)|GO:000550…	0.131453	0.142222	0.197188	0.225034	0.165212	0.178116	1.7195	1.32155	1.60298	1.40533	1.47423	1.21615	5	6	8.495	9.39e-09		delta-like 4 (Drosophila)	Homo sapiens delta-like 4 (Drosophila) (DLL4), mRNA [NM_019074]	CAGGGACTCCATGTACCAGTCTGTGTGTTTGATATCAGAGGAGAGGAATGAATGTGTCAT
A_23_P2271	NM_198965	PTHLH	Hs.591159	5744	hs|12p11.22	GO:0001501(skeletal system development)|GO:0001958(endochondral ossification)|GO:0002076(osteoblast development)|GO:0005179(hormone activity)|GO:0005576(extracellular region)|GO:0005615(extracellular space)|GO:0005634(nucleus)|GO:0005730(nucleolus)|GO:0005737(cytoplasm)|GO:0005794(Golgi apparatus)|GO:0007189(adenylate cyclase-activating G-protein coupled receptor signaling pathway)|GO:0007267(cel…	2.34138	2.97108	3.20616	3.14643	2.60741	2.62106	19.7234	20.447	29.4455	25.6324	24.9561	23.2763	6	6	8.468	2.02e-10		parathyroid hormone-like hormone	Homo sapiens parathyroid hormone-like hormone (PTHLH), transcript variant 1, mRNA [NM_198965]	AGCAGGAAAAGAAAAAACGGCGAACTCGCTCTGCCTGGTTAGACTCTGGAGTGACTGGGA
A_33_P3237150	NM_001200	BMP2	Hs.73853	650	hs|20p12.3	GO:0000122(negative regulation of transcription from RNA polymerase II promoter)|GO:0000187(activation of MAPK activity)|GO:0001501(skeletal system development)|GO:0001649(osteoblast differentiation)|GO:0001658(branching involved in ureteric bud morphogenesis)|GO:0001666(response to hypoxia)|GO:0001701(in utero embryonic development)|GO:0001837(epithelial to mesenchymal transition)|GO:0001934(pos…	1.82767	1.34336	1.7254	1.50778	1.35251	1.66736	11.1942	15.1867	11.4563	13.9339	11.9867	13.7549	6	6	8.23	5.98e-11		bone morphogenetic protein 2	Homo sapiens bone morphogenetic protein 2 (BMP2), mRNA [NM_001200]	GCTTTTCTTTCCAAGGTTGTGTGTTTGAACACATTTCTCCAAATGTTAAACCTATTTCAG
A_23_P151529	NM_001282463	C14orf132	Hs.6434	56967	hs|14q32.2	GO:0016021(integral to membrane)	0.187918	0.129021	0.189137	0.151478	0.126438	0.115779	1.16124	1.37373	1.33184	1.27505	1.15695	1.00389	4	6	8.224	3.4e-08		chromosome 14 open reading frame 132	Homo sapiens chromosome 14 open reading frame 132 (C14orf132), transcript variant 1, mRNA [NM_001282463]	ATCTTTTGCAGAAACCTTACTATTATAACTTGCTACTCTCCAGATACCAATTCTTCATGC
A_23_P146146	NM_152565	ATP6V0D2	Hs.436360	245972	hs|8q21.3	GO:0005515(protein binding)|GO:0005769(early endosome)|GO:0006879(cellular iron ion homeostasis)|GO:0008286(insulin receptor signaling pathway)|GO:0010008(endosome membrane)|GO:0015078(hydrogen ion transmembrane transporter activity)|GO:0015991(ATP hydrolysis coupled proton transport)|GO:0016020(membrane)|GO:0016324(apical plasma membrane)|GO:0016471(vacuolar proton-transporting V-type ATPase com…	0.0407192	0.0226641	0.0250382	0.0209931	0.0325318	0.0301135	0.173948	0.171647	0.225337	0.127632	0.771454	0.214408	0	4	8.177	0.000179		ATPase, H+ transporting, lysosomal 38kDa, V0 subunit d2	Homo sapiens ATPase, H+ transporting, lysosomal 38kDa, V0 subunit d2 (ATP6V0D2), mRNA [NM_152565]	AGTAAGCCACACTATATCTTCATGAGTTGCAAATCCATGGAAACACAGTAAACCAGCCCT
A_23_P31073	NM_005375	MYB	Hs.606320	4602	hs|6q23.3	GO:0000082(G1/S transition of mitotic cell cycle)|GO:0000122(negative regulation of transcription from RNA polymerase II promoter)|GO:0000978(RNA polymerase II core promoter proximal region sequence-specific DNA binding)|GO:0001701(in utero embryonic development)|GO:0003682(chromatin binding)|GO:0003700(sequence-specific DNA binding transcription factor activity)|GO:0005515(protein binding)|GO:00…	0.0393396	0.0539942	0.0288722	0.025436	0.0691033	0.0288059	0.41973	0.317994	0.244208	0.318716	0.276998	0.304499	0	6	8.099	7.8e-06		v-myb avian myeloblastosis viral oncogene homolog	Homo sapiens v-myb avian myeloblastosis viral oncogene homolog (MYB), transcript variant 2, mRNA [NM_005375]	ATGCAAGATGGCCAGCACTGAACTTTTGAGATATGACGGTGTACTTACTGCCTTGTAGCA
A_23_P214080	NM_001964	EGR1	Hs.326035	1958	hs|5q31.2	GO:0000122(negative regulation of transcription from RNA polymerase II promoter)|GO:0000976(transcription regulatory region sequence-specific DNA binding)|GO:0000979(RNA polymerase II core promoter sequence-specific DNA binding)|GO:0001077(RNA polymerase II core promoter proximal region sequence-specific DNA binding transcription factor activity involved in positive regulation of transcription)|G…	0.804623	0.283881	0.279427	0.250223	0.308013	0.373779	2.44393	2.86638	2.8939	3.14729	2.55822	3.09142	6	6	8.061	4.2e-05		early growth response 1	Homo sapiens early growth response 1 (EGR1), mRNA [NM_001964]	AAACAAAGTGACTGTTTGGCTTATAAACACATTGAATGCGCTTTATTGCCCATGGGATAT
A_23_P137381	NM_002167	ID3	Hs.76884	3399	hs|1p36.12	GO:0000122(negative regulation of transcription from RNA polymerase II promoter)|GO:0001656(metanephros development)|GO:0003700(sequence-specific DNA binding transcription factor activity)|GO:0003714(transcription corepressor activity)|GO:0005634(nucleus)|GO:0005730(nucleolus)|GO:0005737(cytoplasm)|GO:0006275(regulation of DNA replication)|GO:0006351(transcription, DNA-dependent)|GO:0007275(multi…	8.55636	32.5964	28.2961	31.1379	28.1046	24.8125	189.129	181.961	209.619	209.622	196.644	150.526	6	6	7.995	9.94e-05		inhibitor of DNA binding 3, dominant negative helix-loop-helix protein	Homo sapiens inhibitor of DNA binding 3, dominant negative helix-loop-helix protein (ID3), mRNA [NM_002167]	AGCCAGGTGGAAATCCTACAGCGCGTCATCGACTACATTCTCGACCTGCAGGTAGTCCTG
A_23_P118392	NM_016084	RASD1	Hs.25829	51655	hs|17p11.2	GO:0003924(GTPase activity)|GO:0005525(GTP binding)|GO:0005634(nucleus)|GO:0005886(plasma membrane)|GO:0006184(GTP catabolic process)|GO:0007165(signal transduction)|GO:0007186(G-protein coupled receptor signaling pathway)|GO:0007263(nitric oxide mediated signal transduction)|GO:0007264(small GTPase mediated signal transduction)|GO:0045892(negative regulation of transcription, DNA-dependent)|GO:0…	0.264089	0.199518	0.173556	0.149091	0.183421	0.193629	1.32625	1.39592	1.81354	1.49197	1.35383	1.58703	6	6	7.783	8.67e-09		RAS, dexamethasone-induced 1	Homo sapiens RAS, dexamethasone-induced 1 (RASD1), transcript variant 1, mRNA [NM_016084]	CTTACCCAGGTGTTTATACTGTGTGTGTGTGAGGTCTTTAAAGTTATTGCTTTATTTGGT
A_23_P3532	NM_004862	LITAF	Hs.459940	9516	hs|16p13.13	GO:0001817(regulation of cytokine production)|GO:0004871(signal transducer activity)|GO:0005515(protein binding)|GO:0005634(nucleus)|GO:0005730(nucleolus)|GO:0005737(cytoplasm)|GO:0005765(lysosomal membrane)|GO:0005794(Golgi apparatus)|GO:0005886(plasma membrane)|GO:0006351(transcription, DNA-dependent)|GO:0006357(regulation of transcription from RNA polymerase II promoter)|GO:0006915(apoptotic p…	0.0528234	0.106482	0.137867	0.13661	0.0527792	0.0791871	0.695974	0.704116	0.499957	0.676634	0.651231	0.843241	1	6	7.683	2.53e-05		lipopolysaccharide-induced TNF factor	Homo sapiens lipopolysaccharide-induced TNF factor (LITAF), transcript variant 1, mRNA [NM_004862]	GACATATCCACAAGGTCGTAAATGCATGCTAGAAAAATAGGGCTGGATCTTATCACTGCC
A_24_P104407	NM_145728	SYNM	Hs.207106	23336	hs|15q26.3	GO:0005200(structural constituent of cytoskeleton)|GO:0005515(protein binding)|GO:0005882(intermediate filament)|GO:0005912(adherens junction)|GO:0008307(structural constituent of muscle)|GO:0016020(membrane)|GO:0017166(vinculin binding)|GO:0019215(intermediate filament binding)|GO:0043034(costamere)|GO:0045104(intermediate filament cytoskeleton organization)|GO:0060053(neurofilament cytoskeleton)	0.375499	0.304569	0.39978	0.547057	0.36296	0.259989	2.50601	3.32043	3.02185	2.06091	2.47213	3.47507	6	6	7.573	5.03e-08		synemin, intermediate filament protein	Homo sapiens synemin, intermediate filament protein (SYNM), transcript variant A, mRNA [NM_145728]	ATCATCTGCAAGTTTCAAGAAGTATTCTGCCAAAAGTATTTACAAGTATGGACTCATGAG
A_33_P3269110	NM_001130687	GUCY1A3	Hs.24258	2982	hs|4q32.1	GO:0004383(guanylate cyclase activity)|GO:0004872(receptor activity)|GO:0005525(GTP binding)|GO:0006182(cGMP biosynthetic process)|GO:0007263(nitric oxide mediated signal transduction)|GO:0007596(blood coagulation)|GO:0008015(blood circulation)|GO:0008074(guanylate cyclase complex, soluble)|GO:0008217(regulation of blood pressure)|GO:0020037(heme binding)|GO:0030828(positive regulation of cGMP bi…	0.0455916	0.0382433	0.275249	0.0219549	0.0342085	0.0467683	0.425095	0.501794	0.267226	0.316225	0.372718	0.45666	1	6	7.528	0.00182		guanylate cyclase 1, soluble, alpha 3	Homo sapiens guanylate cyclase 1, soluble, alpha 3 (GUCY1A3), transcript variant 7, mRNA [NM_001130687]	CAACCAGACGTTTAGCGGGATCATGACTATGTTGAATATGCAGTTTGTTGTACGAGTGAG
A_23_P209320	NM_022817	PER2	Hs.58756	8864	hs|2q37.3	GO:0000122(negative regulation of transcription from RNA polymerase II promoter)|GO:0000976(transcription regulatory region sequence-specific DNA binding)|GO:0000989(transcription factor binding transcription factor activity)|GO:0002931(response to ischemia)|GO:0003713(transcription coactivator activity)|GO:0004871(signal transducer activity)|GO:0005515(protein binding)|GO:0005634(nucleus)|GO:000…	0.243152	0.286421	0.263455	0.289437	0.247557	0.26444	1.54293	2.05411	2.08132	1.74211	2.0345	2.35675	6	6	7.356	9.25e-09		period circadian clock 2	Homo sapiens period circadian clock 2 (PER2), mRNA [NM_022817]	ATTCCCGAAGAGATATGTAAATAAGCTCTCAGAGTTTCTGTGATGATTTGTTGAGCCTTG
A_32_P32413	NM_015559	SETBP1	Hs.435458	26040	hs|18q12.3	GO:0003677(DNA binding)|GO:0005634(nucleus)	0.25921	0.22134	0.268302	0.199046	0.206444	0.225329	1.38967	1.75377	1.66118	1.91263	1.49193	1.93977	6	6	7.347	1.29e-10		SET binding protein 1	Homo sapiens SET binding protein 1 (SETBP1), transcript variant 1, mRNA [NM_015559]	TGGACTTGCTGTTATTTGAGGCGTAGATACATCTAGCATGCTTACTGTCATGCTCCTCCA
A_21_P0006066	ENST00000435444		Hs.610516		hs|9p24.1		0.0388213	0.0413197	0.0560289	0.0269524	0.0299471	0.0264988	0.298024	0.400534	0.272691	0.121991	0.270475	0.279767	0	5	7.339	3.29e-06			603076822F1 NIH_MGC_119 Homo sapiens cDNA clone IMAGE:5168765 5', mRNA sequence [BI825881]	GCATACAATTGATTCCAATCCATCCATCACTTAAACTACTGTCTAGGACATCAGGAGGCC
A_23_P58009	NM_024616	C3orf52	Hs.434247	79669	hs|3q13.2	GO:0005789(endoplasmic reticulum membrane)|GO:0016021(integral to membrane)	0.563704	0.397328	0.342746	0.418836	0.325207	0.468869	2.34033	2.81539	2.95576	3.7088	3.09145	2.96631	6	6	7.163	1.06e-08		chromosome 3 open reading frame 52	Homo sapiens chromosome 3 open reading frame 52 (C3orf52), transcript variant 2, mRNA [NM_024616]	ACCAGGAGAAAGAGTTTTGTGCTGTATTGTGAGAGATCTCGCCTCTCAGTTAAATGAGCC
A_23_P14193	NM_002915	RFC3	Hs.115474	5983	hs|13q13.2	GO:0000166(nucleotide binding)|GO:0000278(mitotic cell cycle)|GO:0000722(telomere maintenance via recombination)|GO:0000723(telomere maintenance)|GO:0000731(DNA synthesis involved in DNA repair)|GO:0003677(DNA binding)|GO:0003689(DNA clamp loader activity)|GO:0005515(protein binding)|GO:0005654(nucleoplasm)|GO:0005663(DNA replication factor C complex)|GO:0006200(ATP catabolic process)|GO:0006260(…	0.0792792	0.515662	0.380108	0.441687	0.325547	0.285897	2.10694	2.45334	2.06553	2.1944	2.23866	1.62747	5	6	7.15	0.000658		replication factor C (activator 1) 3, 38kDa	Homo sapiens replication factor C (activator 1) 3, 38kDa (RFC3), transcript variant 1, mRNA [NM_002915]	ATTCAAGTATTCATTGTTGATCCTCCTATTCTCTTCCGTCTAATCTCTCACCTGCTAAAG
A_23_P126075	NM_002245	KCNK1	Hs.208544	3775	hs|1q42.2	GO:0005242(inward rectifier potassium channel activity)|GO:0005768(endosome)|GO:0005886(plasma membrane)|GO:0006813(potassium ion transport)|GO:0007268(synaptic transmission)|GO:0008076(voltage-gated potassium channel complex)|GO:0016324(apical plasma membrane)|GO:0031526(brush border membrane)|GO:0034765(regulation of ion transmembrane transport)|GO:0035094(response to nicotine)|GO:0071805(potas…	0.15127	0.161631	0.118543	0.222341	0.180776	0.113221	0.911027	1.16366	1.19621	1.15142	0.990466	1.17312	6	6	7.105	6.8e-07		potassium channel, subfamily K, member 1	Homo sapiens potassium channel, subfamily K, member 1 (KCNK1), mRNA [NM_002245]	AGTATGCTGCTGTGGTTAGAAGCAGATTTTATACTTTTAACTGGAAACTTTGGGGTTTGC
A_23_P150018	NM_004419	DUSP5	Hs.2128	1847	hs|10q25.2	GO:0000188(inactivation of MAPK activity)|GO:0001706(endoderm formation)|GO:0004725(protein tyrosine phosphatase activity)|GO:0005515(protein binding)|GO:0005634(nucleus)|GO:0006470(protein dephosphorylation)|GO:0008138(protein tyrosine/serine/threonine phosphatase activity)|GO:0017017(MAP kinase tyrosine/serine/threonine phosphatase activity)|GO:0035335(peptidyl-tyrosine dephosphorylation)	1.99671	1.42497	1.30639	1.37481	1.54338	1.5677	9.51713	11.0691	9.8661	12.384	9.66234	11.2593	6	6	6.956	1.01e-09		dual specificity phosphatase 5	Homo sapiens dual specificity phosphatase 5 (DUSP5), mRNA [NM_004419]	TGGGAAAAGAGTTCTTCAGATCATAGACCAAAAAAGTCATACCTTCGAGGTGGTAGCAGT
A_23_P257365	NM_005263	GFI1	Hs.73172	2672	hs|1p22.1	GO:0000083(regulation of transcription involved in G1/S phase of mitotic cell cycle)|GO:0000122(negative regulation of transcription from RNA polymerase II promoter)|GO:0001078(RNA polymerase II core promoter proximal region sequence-specific DNA binding transcription factor activity involved in negative regulation of transcription)|GO:0005515(protein binding)|GO:0005634(nucleus)|GO:0006351(trans…	0.0440281	0.0293367	0.0499046	0.0839019	0.050444	0.0302373	0.274555	0.319554	0.239557	0.488423	0.23745	0.353653	0	4	6.863	3.81e-06		growth factor independent 1 transcription repressor	Homo sapiens growth factor independent 1 transcription repressor (GFI1), transcript variant 1, mRNA [NM_005263]	CTGTGGACAAGATGTCATTCATTCACTCAGCAAATGTTCATGGATCACCGGCTACCAAGT
A_23_P51126	NM_016232	IL1RL1	Hs.66	9173	hs|2q12.1	GO:0002113(interleukin-33 binding)|GO:0002114(interleukin-33 receptor activity)|GO:0002826(negative regulation of T-helper 1 type immune response)|GO:0004896(cytokine receptor activity)|GO:0004908(interleukin-1 receptor activity)|GO:0005057(receptor signaling protein activity)|GO:0005515(protein binding)|GO:0005576(extracellular region)|GO:0006955(immune response)|GO:0007165(signal transduction)|…	1.30427	1.54167	1.37551	1.77711	1.42922	1.67444	8.91126	8.9419	12.5586	12.2106	8.74387	11.4022	6	6	6.853	3.46e-09		interleukin 1 receptor-like 1	Homo sapiens interleukin 1 receptor-like 1 (IL1RL1), transcript variant 1, mRNA [NM_016232]	TGGTTTTAAGAATAGCTGACGTGAAGGAAGAGGATTTATTGCTGCAGTACGACTGTCTGG
A_24_P322354	NM_001039535	SKA1	Hs.134726	220134	hs|18q21.1	GO:0000278(mitotic cell cycle)|GO:0000940(condensed chromosome outer kinetochore)|GO:0005515(protein binding)|GO:0005829(cytosol)|GO:0005876(spindle microtubule)|GO:0007059(chromosome segregation)|GO:0007067(mitosis)|GO:0008017(microtubule binding)|GO:0015630(microtubule cytoskeleton)|GO:0031110(regulation of microtubule polymerization or depolymerization)|GO:0051301(cell division)	0.299611	0.483602	0.548662	0.547716	0.532553	0.564535	2.68891	3.59655	3.29579	3.9996	3.27737	3.22714	6	6	6.847	2.09e-07		spindle and kinetochore associated complex subunit 1	Homo sapiens spindle and kinetochore associated complex subunit 1 (SKA1), transcript variant 1, mRNA [NM_001039535]	ACCTGAAATGCATTTAGTGTACACCAGTCTGTAAACTTCAACCTGTAATGAAAGTGTAAT
A_24_P244699	NM_018283	NUDT15	Hs.144407	55270	hs|13q14.2	GO:0005829(cytosol)|GO:0006184(GTP catabolic process)|GO:0006203(dGTP catabolic process)|GO:0008413(8-oxo-7,8-dihydroguanosine triphosphate pyrophosphatase activity)|GO:0034656(nucleobase-containing small molecule catabolic process)|GO:0035539(8-oxo-7,8-dihydrodeoxyguanosine triphosphate pyrophosphatase activity)|GO:0044281(small molecule metabolic process)|GO:0046872(metal ion binding)|GO:005508…	0.28595	0.425393	0.646048	0.546836	0.566723	0.4987	2.7884	3.23239	3.91283	3.37281	3.41071	2.81471	6	6	6.743	1.77e-06		nudix (nucleoside diphosphate linked moiety X)-type motif 15	Homo sapiens nudix (nucleoside diphosphate linked moiety X)-type motif 15 (NUDT15), mRNA [NM_018283]	ACCATCTAATATCTGTATCATGCTATTAATAGGCTGTGATGTTGAGTTTCTCACTTACTC
A_23_P66948	NM_022751	GAREM	Hs.444314	64762	hs|18q12.1	GO:0005515(protein binding)|GO:0005886(plasma membrane)|GO:0007173(epidermal growth factor receptor signaling pathway)|GO:0008284(positive regulation of cell proliferation)|GO:0051781(positive regulation of cell division)|GO:0070064(proline-rich region binding)|GO:0070374(positive regulation of ERK1 and ERK2 cascade)|GO:0071364(cellular response to epidermal growth factor stimulus)	0.234738	0.124077	0.0979943	0.144642	0.161877	0.113996	0.953896	0.9662	0.900299	0.847815	0.979607	0.933003	4	6	6.623	1.61e-05		GRB2 associated, regulator of MAPK1	Homo sapiens GRB2 associated, regulator of MAPK1 (GAREM), transcript variant 2, mRNA [NM_022751]	AACACTTGGAGGTGTGCCTTGTACGTCACTCAACAAACACTCAGCAGCTGCTAAAAGAAA
A_23_P34915	NM_001040619	ATF3	Hs.460	467	hs|1q32.3	GO:0000977(RNA polymerase II regulatory region sequence-specific DNA binding)|GO:0003700(sequence-specific DNA binding transcription factor activity)|GO:0003714(transcription corepressor activity)|GO:0005515(protein binding)|GO:0005634(nucleus)|GO:0005654(nucleoplasm)|GO:0005730(nucleolus)|GO:0006094(gluconeogenesis)|GO:0006351(transcription, DNA-dependent)|GO:0006987(activation of signaling prot…	1.23541	0.704665	0.731052	0.623829	0.806971	0.754296	4.58191	5.69761	4.88225	6.05451	4.77672	5.45089	6	6	6.606	3.82e-07		activating transcription factor 3	Homo sapiens activating transcription factor 3 (ATF3), transcript variant 4, mRNA [NM_001040619]	GATGTCAATAGCATTGTTTTTGTCATGTAGCTGTTTTAAGAAATCTGGCCCAGGGTGTTT
A_33_P3216008	NM_145061	SKA3	Hs.88523	221150	hs|13q12.11	GO:0000940(condensed chromosome outer kinetochore)|GO:0005515(protein binding)|GO:0005737(cytoplasm)|GO:0005876(spindle microtubule)|GO:0007059(chromosome segregation)|GO:0007067(mitosis)|GO:0031110(regulation of microtubule polymerization or depolymerization)	0.0295208	0.0395143	0.0176346	0.0388787	0.126251	0.020933	0.258483	0.300124	0.0953082	0.344299	0.245019	0.238272	1	5	6.425	0.000461		spindle and kinetochore associated complex subunit 3	Homo sapiens spindle and kinetochore associated complex subunit 3 (SKA3), transcript variant 1, mRNA [NM_145061]	GGAGAGTGATGATTCTGTGAATATTGCTGAGAATTCAAATAAAAAGAGGACTGAGAACTG
A_23_P215634	NM_001013398	IGFBP3	Hs.450230	3486	hs|7p12.3	GO:0001558(regulation of cell growth)|GO:0001933(negative regulation of protein phosphorylation)|GO:0001968(fibronectin binding)|GO:0005515(protein binding)|GO:0005520(insulin-like growth factor binding)|GO:0005576(extracellular region)|GO:0005615(extracellular space)|GO:0005634(nucleus)|GO:0006468(protein phosphorylation)|GO:0006915(apoptotic process)|GO:0008160(protein tyrosine phosphatase acti…	0.0456772	0.0524996	0.0526736	0.0982672	0.0702288	0.0439723	0.306292	0.353428	0.401757	0.388746	0.352745	0.384721	1	6	6.254	8.02e-06		insulin-like growth factor binding protein 3	Homo sapiens insulin-like growth factor binding protein 3 (IGFBP3), transcript variant 1, mRNA [NM_001013398]	AGCCTCCACATTCAGAGGCATCACAAGTAATGGCACAATTCTTCGGATGACTGCAGAAAA
A_23_P142075	NM_001611	ACP5	Hs.1211	54	hs|19p13.2	GO:0003993(acid phosphatase activity)|GO:0005764(lysosome)|GO:0005829(cytosol)|GO:0006766(vitamin metabolic process)|GO:0006767(water-soluble vitamin metabolic process)|GO:0006771(riboflavin metabolic process)|GO:0008198(ferrous iron binding)|GO:0008199(ferric iron binding)|GO:0016021(integral to membrane)|GO:0016311(dephosphorylation)|GO:0032496(response to lipopolysaccharide)|GO:0032691(negativ…	0.388434	0.278938	0.200521	0.14718	0.271437	0.270975	1.75247	1.62545	1.55841	1.64398	1.16137	1.65313	6	6	6.249	5.77e-06		acid phosphatase 5, tartrate resistant	Homo sapiens acid phosphatase 5, tartrate resistant (ACP5), transcript variant 4, mRNA [NM_001611]	TTTGCTGAGTTCCGGGGTGCAATGGGGGAGGGAGGGAGGGAAAGCTTCCTCCTAAATCAA
A_33_P3224819	NM_001286646	SLC45A4	Hs.372492	57210	hs|8q24.3	GO:0006810(transport)|GO:0016021(integral to membrane)	0.738406	0.475598	0.55001	0.529616	0.478039	0.515263	2.94084	3.40438	3.68991	3.60833	3.18381	3.50966	6	6	6.241	1.78e-08		solute carrier family 45, member 4	Homo sapiens solute carrier family 45, member 4 (SLC45A4), transcript variant 1, mRNA [NM_001286646]	TTTAGAACTAAGCCTATTTGAAACGGTCGGTGTAGGCTTACTGAGATCAGGAGACAGGGA
A_23_P131846	NM_005985	SNAI1	Hs.48029	6615	hs|20q13.13	GO:0000122(negative regulation of transcription from RNA polymerase II promoter)|GO:0001078(RNA polymerase II core promoter proximal region sequence-specific DNA binding transcription factor activity involved in negative regulation of transcription)|GO:0001649(osteoblast differentiation)|GO:0001707(mesoderm formation)|GO:0001837(epithelial to mesenchymal transition)|GO:0005515(protein binding)|GO…	5.44939	8.25913	7.20093	7.541	7.77117	6.73523	38.7713	40.3484	51.8734	48.9353	42.5076	42.0377	6	6	6.176	9.01e-10		snail family zinc finger 1	Homo sapiens snail family zinc finger 1 (SNAI1), mRNA [NM_005985]	AACAATGTCTGAAAAGGGACTGTGAGTAATGGCTGTCACTTGTCGGGGGCCCAAGTGGGG
A_23_P380318	NM_001965	EGR4	Hs.3052	1961	hs|2p13.1	GO:0003677(DNA binding)|GO:0003700(sequence-specific DNA binding transcription factor activity)|GO:0005634(nucleus)|GO:0005737(cytoplasm)|GO:0006351(transcription, DNA-dependent)|GO:0006355(regulation of transcription, DNA-dependent)|GO:0008284(positive regulation of cell proliferation)|GO:0043066(negative regulation of apoptotic process)|GO:0046872(metal ion binding)|GO:0071320(cellular response…	0.0702173	0.0253142	0.0261004	0.0243039	0.0329586	0.227219	0.18056	0.179534	0.367456	0.227131	0.474657	0.35941	1	6	6.16	0.00255		early growth response 4	Homo sapiens early growth response 4 (EGR4), mRNA [NM_001965]	GACTTTGTACAGCAGTGTCTTATCCAGCAGCCGATTGGATGTAACGTTTTGCTTTGGGTT
A_23_P500501	NM_000142	FGFR3	Hs.1420	2261	hs|4p16.3	GO:0000122(negative regulation of transcription from RNA polymerase II promoter)|GO:0000165(MAPK cascade)|GO:0001501(skeletal system development)|GO:0001938(positive regulation of endothelial cell proliferation)|GO:0001958(endochondral ossification)|GO:0002009(morphogenesis of an epithelium)|GO:0002062(chondrocyte differentiation)|GO:0002089(lens morphogenesis in camera-type eye)|GO:0003416(endoc…	0.443635	0.1914	0.201658	0.203245	0.259727	0.194297	1.37878	1.3729	1.51071	1.68832	1.16976	1.69859	6	6	6.16	6.02e-06		fibroblast growth factor receptor 3	Homo sapiens fibroblast growth factor receptor 3 (FGFR3), transcript variant 1, mRNA [NM_000142]	TGCTACCTTTCAAAGCTTGGAGGGAAGCCGTGAATTCAGTTGGTTCGTTCTGTACTGTTA
A_33_P3599591	NM_002581	PAPPA	Hs.643599	5069	hs|9q33.1	GO:0004175(endopeptidase activity)|GO:0005576(extracellular region)|GO:0005615(extracellular space)|GO:0006508(proteolysis)|GO:0007565(female pregnancy)|GO:0008237(metallopeptidase activity)|GO:0008270(zinc ion binding)|GO:0016020(membrane)|GO:0030154(cell differentiation)|GO:0032354(response to follicle-stimulating hormone stimulus)|GO:0044267(cellular protein metabolic process)|GO:0051384(respo…	0.938904	0.565404	0.729376	0.687928	0.640464	0.634395	4.52866	4.78991	3.90219	4.14777	4.01393	4.11123	6	6	6.139	7.24e-08		pregnancy-associated plasma protein A, pappalysin 1	Homo sapiens pregnancy-associated plasma protein A, pappalysin 1 (PAPPA), mRNA [NM_002581]	GGTATTTCTAATTAATATGATGTTGAAACCTGTTTGGCACCTTCTGGAAGCTACCAAAAA
A_23_P302634	NM_173591	OTOGL	Hs.723594	283310	hs|12q21.31	GO:0005576(extracellular region)|GO:0046373(L-arabinose metabolic process)|GO:0046556(alpha-N-arabinofuranosidase activity)	0.0314514	0.0482383	0.0294311	0.0758806	0.0607925	0.0304199	0.230041	0.296287	0.25799	0.214372	0.247066	0.359111	0	6	6.136	2.07e-05		otogelin-like	Homo sapiens otogelin-like (OTOGL), mRNA [NM_173591]	TGCAAAGTCTGCTATAGCTATCCAAATTAAGGTACCCTTTAATATGTACTCCTTAATCTG
A_33_P3326210	NM_001017420	ESCO2	Hs.99480	157570	hs|8p21.1	GO:0000278(mitotic cell cycle)|GO:0000785(chromatin)|GO:0005634(nucleus)|GO:0005654(nucleoplasm)|GO:0005794(Golgi apparatus)|GO:0006275(regulation of DNA replication)|GO:0016746(transferase activity, transferring acyl groups)|GO:0034421(post-translational protein acetylation)|GO:0046872(metal ion binding)	0.0291638	0.0190683	0.081202	0.123447	0.0952275	0.0346979	0.307164	0.394789	0.335283	0.29532	0.269706	0.289248	1	6	6.087	0.00174		establishment of sister chromatid cohesion N-acetyltransferase 2	Homo sapiens establishment of sister chromatid cohesion N-acetyltransferase 2 (ESCO2), mRNA [NM_001017420]	TTCATGTTTGGCTGTTTTCTCAGCACTGATGAAATAGCATTTTCTGACCCAACACCAGAT
A_33_P3372426	NM_007038	ADAMTS5	Hs.58324	11096	hs|21q21.3	GO:0004222(metalloendopeptidase activity)|GO:0005178(integrin binding)|GO:0005515(protein binding)|GO:0005576(extracellular region)|GO:0005578(proteinaceous extracellular matrix)|GO:0006508(proteolysis)|GO:0008237(metallopeptidase activity)|GO:0008270(zinc ion binding)|GO:0022617(extracellular matrix disassembly)|GO:0030198(extracellular matrix organization)	0.0927832	0.0316423	0.063945	0.0208172	0.0259741	0.0795514	0.261141	0.348378	0.270669	0.278698	0.222105	0.264355	0	5	6.068	0.000688		ADAM metallopeptidase with thrombospondin type 1 motif, 5	Homo sapiens ADAM metallopeptidase with thrombospondin type 1 motif, 5 (ADAMTS5), mRNA [NM_007038]	CTATGTGTGACTTTAAACTGTAAAATTAAACACTGCTTTTGTGGGTTCAGTGGGCATAAT
A_23_P391396	NM_001005463	EBF3	Hs.591374	253738	hs|10q26.3	GO:0003677(DNA binding)|GO:0005634(nucleus)|GO:0006351(transcription, DNA-dependent)|GO:0007275(multicellular organismal development)|GO:0045893(positive regulation of transcription, DNA-dependent)|GO:0046872(metal ion binding)|GO:0046983(protein dimerization activity)	0.060551	0.0190492	0.0376365	0.0953653	0.0238826	0.0640124	0.249429	0.320984	0.301149	0.20997	0.205827	0.294407	1	6	6.038	0.000532		early B-cell factor 3	Homo sapiens early B-cell factor 3 (EBF3), mRNA [NM_001005463]	AAATTGCCTCCATTTTATTTTGTACGAGTAAGGGTTTGATCTACAAAAGAGCTCACATGG
A_23_P500892	NM_003320	TUB	Hs.568986	7275	hs|11p15.4	GO:0005576(extracellular region)|GO:0005634(nucleus)|GO:0005737(cytoplasm)|GO:0005829(cytosol)|GO:0005886(plasma membrane)|GO:0006909(phagocytosis)|GO:0007602(phototransduction)|GO:0007605(sensory perception of sound)|GO:0008020(G-protein coupled photoreceptor activity)|GO:0009584(detection of visible light)|GO:0009725(response to hormone stimulus)|GO:0032403(protein complex binding)|GO:0044259(m…	0.0697838	0.0930836	0.0525306	0.0805254	0.0593323	0.0267744	0.368687	0.283072	0.354935	0.401101	0.324263	0.42987	0	6	6.017	6.97e-05		tubby bipartite transcription factor	Homo sapiens tubby bipartite transcription factor (TUB), transcript variant 1, mRNA [NM_003320]	CTCTAGGTCCATTTTCCTAACCACAAGATAAAGATGTTACATTGTCAAAGCTTGCCGTAG
A_23_P201808	NM_003713	PPAP2B	Hs.405156	8613	hs|1p32.2	GO:0001568(blood vessel development)|GO:0001702(gastrulation with mouth forming second)|GO:0001933(negative regulation of protein phosphorylation)|GO:0004721(phosphoprotein phosphatase activity)|GO:0005178(integrin binding)|GO:0005515(protein binding)|GO:0005794(Golgi apparatus)|GO:0005886(plasma membrane)|GO:0005912(adherens junction)|GO:0006629(lipid metabolic process)|GO:0006644(phospholipid m…	7.51417	17.9537	16.8607	19.5911	17.7944	13.6523	89.0596	86.4459	102.341	101.633	82.6831	77.2777	6	6	6.013	2.29e-05		phosphatidic acid phosphatase type 2B	Homo sapiens phosphatidic acid phosphatase type 2B (PPAP2B), mRNA [NM_003713]	TATGGATCAACCACATGCACATCCTTACTACAGAATCCGTCCTTTCATTTCAACTTATAG
A_23_P138507	NM_001786	CDK1	Hs.732435	983	hs|10q21.2	GO:0000082(G1/S transition of mitotic cell cycle)|GO:0000083(regulation of transcription involved in G1/S phase of mitotic cell cycle)|GO:0000086(G2/M transition of mitotic cell cycle)|GO:0000165(MAPK cascade)|GO:0000186(activation of MAPKK activity)|GO:0000187(activation of MAPK activity)|GO:0000226(microtubule cytoskeleton organization)|GO:0000278(mitotic cell cycle)|GO:0002224(toll-like recept…	0.743545	2.07057	1.8667	2.15389	2.01854	1.59606	9.07963	10.1457	11.3656	11.1277	9.65671	8.17057	6	6	5.988	4.95e-05		cyclin-dependent kinase 1	Homo sapiens cyclin-dependent kinase 1 (CDK1), transcript variant 1, mRNA [NM_001786]	CCCATGTCAAAAACTTGGATGAAAATGGCTTGGATTTGCTCTCGAAAATGTTAATCTATG
A_33_P3287959	NM_006989	RASA4	Hs.530089	10156	hs|7q22.1	GO:0005096(GTPase activator activity)|GO:0005099(Ras GTPase activator activity)|GO:0005737(cytoplasm)|GO:0005829(cytosol)|GO:0031235(intrinsic to internal side of plasma membrane)|GO:0032320(positive regulation of Ras GTPase activity)|GO:0035556(intracellular signal transduction)|GO:0046580(negative regulation of Ras protein signal transduction)|GO:0046872(metal ion binding)	1.00138	0.686715	0.752164	0.617458	0.719796	0.670696	4.7414	4.65765	4.02801	4.73208	3.64897	4.5925	6	6	5.98	7.8e-09		RAS p21 protein activator 4	Homo sapiens RAS p21 protein activator 4 (RASA4), transcript variant 1, mRNA [NM_006989]	TAGGATAAATGATATAGGCATTTGGGATTTGCTGCAAAATGACCCAGAGGCAGGGGTCAG
A_23_P146066	NM_003114	SPAG1	Hs.591866	6674	hs|8q22.2	GO:0005525(GTP binding)|GO:0005634(nucleus)|GO:0005730(nucleolus)|GO:0005737(cytoplasm)|GO:0007338(single fertilization)|GO:0008152(metabolic process)|GO:0015630(microtubule cytoskeleton)|GO:0016787(hydrolase activity)|GO:0070286(axonemal dynein complex assembly)	0.0382491	0.22061	0.189089	0.244775	0.0827359	0.0941495	0.669651	0.756626	0.817832	0.571604	0.884253	0.656156	3	6	5.968	0.0014		sperm associated antigen 1	Homo sapiens sperm associated antigen 1 (SPAG1), transcript variant 1, mRNA [NM_003114]	TTTATACCTGAGTAAAGCAGAAAGGTTTAAGATGATGTTGACACTAATTAGCAAGGGCCA
A_24_P38276	NM_003505	FZD1	Hs.94234	8321	hs|7q21.13	GO:0001934(positive regulation of protein phosphorylation)|GO:0001944(vasculature development)|GO:0003149(membranous septum morphogenesis)|GO:0003150(muscular septum morphogenesis)|GO:0003151(outflow tract morphogenesis)|GO:0004930(G-protein coupled receptor activity)|GO:0005102(receptor binding)|GO:0005109(frizzled binding)|GO:0005515(protein binding)|GO:0005737(cytoplasm)|GO:0005886(plasma memb…	0.806093	0.607138	0.589108	0.585088	0.559171	0.564371	3.79762	2.01353	4.44547	4.88313	3.5484	4.07282	6	6	5.965	5e-06		frizzled class receptor 1	Homo sapiens frizzled class receptor 1 (FZD1), mRNA [NM_003505]	AAATGCCGGTACTTAGGACCTAAATTTATCTATGTCTGTCATACGCTAAAATGATATTGG
A_24_P335620	NM_003486	SLC7A5	Hs.513797	8140	hs|16q24.2	GO:0005634(nucleus)|GO:0005730(nucleolus)|GO:0005829(cytosol)|GO:0005886(plasma membrane)|GO:0006520(cellular amino acid metabolic process)|GO:0006810(transport)|GO:0006811(ion transport)|GO:0006865(amino acid transport)|GO:0007399(nervous system development)|GO:0007596(blood coagulation)|GO:0015171(amino acid transmembrane transporter activity)|GO:0015175(neutral amino acid transmembrane transpo…	1.0211	0.814236	0.987493	1.19676	1.02719	1.20842	4.87653	6.35042	8.05174	5.70817	5.62264	6.6237	6	6	5.93	4.1e-09		solute carrier family 7 (amino acid transporter light chain, L system), member 5	Homo sapiens solute carrier family 7 (amino acid transporter light chain, L system), member 5 (SLC7A5), mRNA [NM_003486]	TTTCAGTCGTTGTGCTTTTTTGTTTTGTGCTAACGTCTTACTAATTTAAAGATGCTGTCG
A_23_P65068	NM_001008394	EID3	Hs.659857	493861	hs|12q23.3	GO:0000781(chromosome, telomeric region)|GO:0005515(protein binding)|GO:0005634(nucleus)|GO:0005737(cytoplasm)|GO:0006281(DNA repair)|GO:0006310(DNA recombination)|GO:0006351(transcription, DNA-dependent)|GO:0006355(regulation of transcription, DNA-dependent)|GO:0030915(Smc5-Smc6 complex)|GO:0042802(identical protein binding)	0.0365095	0.213685	0.172657	0.123982	0.209942	0.133439	0.637013	0.763319	0.701148	0.911106	0.714959	0.882598	5	6	5.893	0.000964		EP300 interacting inhibitor of differentiation 3	Homo sapiens EP300 interacting inhibitor of differentiation 3 (EID3), mRNA [NM_001008394]	AATGATTCCAGTTGCCATGGCAGGAAACAGGGAGTTATATCTTTGACTTTACAGGAGTGG
A_23_P210763	NM_000214	JAG1	Hs.626544	182	hs|20p12.2	GO:0001525(angiogenesis)|GO:0001709(cell fate determination)|GO:0002011(morphogenesis of an epithelial sheet)|GO:0002456(T cell mediated immunity)|GO:0003184(pulmonary valve morphogenesis)|GO:0003215(cardiac right ventricle morphogenesis)|GO:0005112(Notch binding)|GO:0005198(structural molecule activity)|GO:0005509(calcium ion binding)|GO:0005515(protein binding)|GO:0005576(extracellular region)|…	1.93306	1.70036	1.74605	1.89921	1.91007	1.71695	8.16459	11.6503	9.99801	12.9769	10.5667	11.2522	6	6	5.873	1.12e-07		jagged 1	Homo sapiens jagged 1 (JAG1), mRNA [NM_000214]	AGTAAGGGAACAAGTTGAGCTATGACTTAACATAGCCAAAATGTGAGTGGTTGAATATGA
A_24_P319613	NM_002497	NEK2	Hs.153704	4751	hs|1q32.3	GO:0000070(mitotic sister chromatid segregation)|GO:0000086(G2/M transition of mitotic cell cycle)|GO:0000278(mitotic cell cycle)|GO:0000776(kinetochore)|GO:0000777(condensed chromosome kinetochore)|GO:0000794(condensed nuclear chromosome)|GO:0000922(spindle pole)|GO:0001824(blastocyst development)|GO:0004672(protein kinase activity)|GO:0004674(protein serine/threonine kinase activity)|GO:0005515…	0.032301	0.13331	0.132977	0.222676	0.153973	0.147605	0.536844	0.616583	0.685906	0.925048	0.763175	0.735861	5	6	5.865	0.000901		NIMA-related kinase 2	Homo sapiens NIMA-related kinase 2 (NEK2), transcript variant 1, mRNA [NM_002497]	ATTCTTGAGAACCCTTTAATAGCAGATTTGGTTGCAGACGAGCAAAGAAGAAATCTTGAG
A_33_P3283833	NM_004118	FOXS1	Hs.516971	2307	hs|20q11.21	GO:0000122(negative regulation of transcription from RNA polymerase II promoter)|GO:0001503(ossification)|GO:0001568(blood vessel development)|GO:0001569(patterning of blood vessels)|GO:0001656(metanephros development)|GO:0001657(ureteric bud development)|GO:0001756(somitogenesis)|GO:0001946(lymphangiogenesis)|GO:0001974(blood vessel remodeling)|GO:0003677(DNA binding)|GO:0003690(double-stranded …	0.820123	0.485089	0.348992	0.38592	0.336411	0.425111	2.52968	2.75011	2.656	2.96142	2.28217	2.48362	6	6	5.86	2.02e-05		forkhead box S1	Homo sapiens forkhead box S1 (FOXS1), mRNA [NM_004118]	AGGGCCTCTTGGGATTTACTCTGTGGCTCTCAGGGCCAATAAAGCCATGTGATGATGAGG
A_33_P3252394	NM_006705	GADD45G	Hs.9701	10912	hs|9q22.2	GO:0000185(activation of MAPKKK activity)|GO:0000186(activation of MAPKK activity)|GO:0005515(protein binding)|GO:0005634(nucleus)|GO:0005737(cytoplasm)|GO:0006469(negative regulation of protein kinase activity)|GO:0006915(apoptotic process)|GO:0006950(response to stress)|GO:0007275(multicellular organismal development)|GO:0030154(cell differentiation)|GO:0043065(positive regulation of apoptotic …	0.849474	0.416118	0.396247	0.386038	0.522399	0.39135	2.4657	2.74257	2.94285	3.07718	2.64012	2.73059	6	6	5.846	1.61e-05		growth arrest and DNA-damage-inducible, gamma	Homo sapiens growth arrest and DNA-damage-inducible, gamma (GADD45G), mRNA [NM_006705]	GGCAATGCTTCGTTTTCTAAAGGATGCTGCTGTTGAAGCTTTGAATTTTACAATAAACTT
A_33_P3248794	NM_005967	NAB2	Hs.159223	4665	hs|12q13.3	GO:0001958(endochondral ossification)|GO:0003714(transcription corepressor activity)|GO:0005634(nucleus)|GO:0006351(transcription, DNA-dependent)|GO:0007399(nervous system development)|GO:0008134(transcription factor binding)|GO:0008283(cell proliferation)|GO:0014037(Schwann cell differentiation)|GO:0016480(negative regulation of transcription from RNA polymerase III promoter)|GO:0042552(myelinat…	8.64742	4.19778	3.91653	3.85891	4.89292	5.30454	23.036	26.9141	33.7661	31.6094	27.9668	27.9248	6	6	5.754	4.54e-06		NGFI-A binding protein 2 (EGR1 binding protein 2)	Homo sapiens NGFI-A binding protein 2 (EGR1 binding protein 2) (NAB2), mRNA [NM_005967]	CACCTATCTGAGCAGTTAGAGCGTCTTTCTTTTCAGATTGTGTACAGTAGATTATTTATT
A_23_P30913	NM_033554	HLA-DPA1	Hs.347270	3113	hs|6p21.32	GO:0000139(Golgi membrane)|GO:0005765(lysosomal membrane)|GO:0005886(plasma membrane)|GO:0005887(integral to plasma membrane)|GO:0006955(immune response)|GO:0009986(cell surface)|GO:0010008(endosome membrane)|GO:0012507(ER to Golgi transport vesicle membrane)|GO:0019221(cytokine-mediated signaling pathway)|GO:0019886(antigen processing and presentation of exogenous peptide antigen via MHC class I…	0.194657	0.163669	0.111183	0.11541	0.185472	0.174727	0.736777	0.949445	0.845378	0.937934	0.82344	1.0334	4	6	5.736	6.74e-07		major histocompatibility complex, class II, DP alpha 1	Homo sapiens major histocompatibility complex, class II, DP alpha 1 (HLA-DPA1), transcript variant 1, mRNA [NM_033554]	CTAATATGGAGATTATCCTTTCATTGAGCCTTTTATCCTCTGTTCTCCTTTGAAGAACCC
A_33_P3316078	NM_001039938	INTS6	Hs.439440	26512	hs|13q14.3	GO:0004888(transmembrane signaling receptor activity)|GO:0005515(protein binding)|GO:0005634(nucleus)|GO:0005730(nucleolus)|GO:0007165(signal transduction)|GO:0015629(actin cytoskeleton)|GO:0016180(snRNA processing)|GO:0032039(integrator complex)	0.0308226	0.0196671	0.0688521	0.0248719	0.122667	0.0640118	0.271019	0.234474	0.172802	0.285462	0.319467	0.256313	1	6	5.619	0.00129		integrator complex subunit 6	Homo sapiens integrator complex subunit 6 (INTS6), transcript variant 3, mRNA [NM_001039938]	CATCACATTTCATAAGTGGTCAAGGCATTTGGACATATTCACCTCCTATTACCTATTAAA
A_24_P376422	XM_006716222	LOC102724229	Hs.729231	102724229	hs|7q22.1		0.617628	0.431618	0.437464	0.284525	0.334976	0.404038	2.03603	2.25065	2.3794	2.60645	2.15189	2.23595	6	6	5.588	4.93e-06		uncharacterized LOC102724229	PREDICTED: Homo sapiens uncharacterized LOC102724229 (LOC102724229), mRNA [XM_006716222]	GAGCCAAGTTTGCATTTTCACACGCATCTCACACTCCTCTGCACTCTCAACTTGGAGAGC
A_23_P368886	NM_175856	CHSY3	Hs.213137	337876	hs|5q23.3	GO:0000139(Golgi membrane)|GO:0005975(carbohydrate metabolic process)|GO:0016021(integral to membrane)|GO:0030203(glycosaminoglycan metabolic process)|GO:0030204(chondroitin sulfate metabolic process)|GO:0030206(chondroitin sulfate biosynthetic process)|GO:0032580(Golgi cisterna membrane)|GO:0044281(small molecule metabolic process)|GO:0046872(metal ion binding)|GO:0047238(glucuronosyl-N-acetylga…	0.0739516	0.352455	0.297711	0.459275	0.395639	0.185242	1.5033	1.29233	1.67657	1.89172	1.17434	1.08701	5	6	5.578	0.00105		chondroitin sulfate synthase 3	Homo sapiens chondroitin sulfate synthase 3 (CHSY3), mRNA [NM_175856]	CAAGAAGTAGGAGTGGTGCATATTTTCCATCCAGTTCATTGTGATCCTAACTTGGACCCT
A_32_P62997	NM_018492	PBK	Hs.104741	55872	hs|8p21.1	GO:0004674(protein serine/threonine kinase activity)|GO:0005515(protein binding)|GO:0005524(ATP binding)|GO:0005575(cellular_component)|GO:0006468(protein phosphorylation)|GO:0007067(mitosis)	0.867735	2.53604	2.24701	2.89677	2.44566	2.46997	10.5227	12.9517	11.5126	13.4365	11.8299	10.0964	6	6	5.546	0.000131		PDZ binding kinase	Homo sapiens PDZ binding kinase (PBK), transcript variant 1, mRNA [NM_018492]	AGCTCTGGAAACAGATGTCTAGTGATCATCTCAGCTGAAGTGTGGCTTGCGTAAATAACT
A_23_P76529	NM_000889	ITGB7	Hs.654470	3695	hs|12q13.13	GO:0001618(viral receptor activity)|GO:0005515(protein binding)|GO:0005886(plasma membrane)|GO:0007155(cell adhesion)|GO:0007160(cell-matrix adhesion)|GO:0007229(integrin-mediated signaling pathway)|GO:0007275(multicellular organismal development)|GO:0008305(integrin complex)|GO:0009615(response to virus)|GO:0030198(extracellular matrix organization)|GO:0043235(receptor complex)|GO:0046872(metal …	0.173892	0.109481	0.124399	0.121212	0.0745409	0.0945008	0.634263	0.591519	0.646852	0.591546	0.526733	0.765616	4	6	5.531	3.52e-06		integrin, beta 7	Homo sapiens integrin, beta 7 (ITGB7), transcript variant 1, mRNA [NM_000889]	CACCCTACTTCATTTTCAGAGTGACACCCAAGAGGGCTGCTTCCCATGCCTGCAACCTTG
A_33_P3356462	NM_207322	C2CD4A	Hs.202656	145741	hs|15q22.2	GO:0005634(nucleus)	0.0924066	0.0512462	0.0351064	0.0501305	0.0247946	0.0504542	0.235495	0.235665	0.316042	0.195853	0.245422	0.305226	0	4	5.396	7.39e-05		C2 calcium-dependent domain containing 4A	Homo sapiens C2 calcium-dependent domain containing 4A (C2CD4A), mRNA [NM_207322]	GTCAATATTTCCTTGGCCCTCAAGCCAACATTCATTTTTTATGTATAACCTTCTTCATGA
A_23_P58266	NM_005980	S100P	Hs.2962	6286	hs|4p16.1	GO:0000287(magnesium ion binding)|GO:0005509(calcium ion binding)|GO:0005515(protein binding)|GO:0005634(nucleus)|GO:0005737(cytoplasm)|GO:0010033(response to organic substance)|GO:0031528(microvillus membrane)|GO:0043542(endothelial cell migration)|GO:0048306(calcium-dependent protein binding)|GO:0050786(RAGE receptor binding)|GO:0070062(extracellular vesicular exosome)	0.119394	0.0975154	0.0580136	0.0470205	0.0788546	0.0633461	0.312174	0.529167	0.457158	0.392531	0.347871	0.358989	0	5	5.346	7.45e-06		S100 calcium binding protein P	Homo sapiens S100 calcium binding protein P (S100P), mRNA [NM_005980]	CCAAAAGTGTTTGTTGGCAATTATTCCCCTAGGCTGAGCCTGCTCATGTACCTCTGATTA
A_23_P153964	NM_002193	INHBB	Hs.1735	3625	hs|2q14.2	GO:0001541(ovarian follicle development)|GO:0005125(cytokine activity)|GO:0005179(hormone activity)|GO:0005515(protein binding)|GO:0005576(extracellular region)|GO:0006952(defense response)|GO:0008083(growth factor activity)|GO:0009267(cellular response to starvation)|GO:0009612(response to mechanical stimulus)|GO:0030154(cell differentiation)|GO:0032869(cellular response to insulin stimulus)|GO:…	0.0955464	0.117136	0.102842	0.0258319	0.0522124	0.0646707	0.33499	0.354285	0.403799	0.368824	0.306333	0.430318	1	6	5.341	0.000582		inhibin, beta B	Homo sapiens inhibin, beta B (INHBB), mRNA [NM_002193]	GTGAACTATGCAATTTAAAGGGTTGACCCACACTAGACGAAACTGGACTCGTACGACTCT
A_23_P128698	NM_005842	SPRY2	Hs.18676	10253	hs|13q31.1	GO:0005515(protein binding)|GO:0005829(cytosol)|GO:0005874(microtubule)|GO:0005886(plasma membrane)|GO:0007173(epidermal growth factor receptor signaling pathway)|GO:0007605(sensory perception of sound)|GO:0008285(negative regulation of cell proliferation)|GO:0008543(fibroblast growth factor receptor signaling pathway)|GO:0010628(positive regulation of gene expression)|GO:0010801(negative regulat…	1.30758	2.96967	3.16515	3.57115	3.20131	2.80669	13.8859	15.4144	15.352	15.9553	13.7533	12.3248	6	6	5.315	5.19e-05		sprouty homolog 2 (Drosophila)	Homo sapiens sprouty homolog 2 (Drosophila) (SPRY2), mRNA [NM_005842]	AGAACTTGGTGACCCATGTATTGCATAAGCTAAAGCAACACAGACACTCCTAGGCAAAGT
A_24_P282416	NM_007313	ABL1	Hs.431048	25	hs|9q34.12	GO:0000287(magnesium ion binding)|GO:0003677(DNA binding)|GO:0003785(actin monomer binding)|GO:0004515(nicotinate-nucleotide adenylyltransferase activity)|GO:0004713(protein tyrosine kinase activity)|GO:0004715(non-membrane spanning protein tyrosine kinase activity)|GO:0005515(protein binding)|GO:0005524(ATP binding)|GO:0005634(nucleus)|GO:0005730(nucleolus)|GO:0005737(cytoplasm)|GO:0005739(mitoc…	0.0625536	0.117214	0.0636098	0.129049	0.0973684	0.0990252	0.356595	0.489514	0.539989	0.706631	0.370665	0.525521	2	6	5.308	1.6e-06		c-abl oncogene 1, non-receptor tyrosine kinase	Homo sapiens c-abl oncogene 1, non-receptor tyrosine kinase (ABL1), transcript variant b, mRNA [NM_007313]	TCAATTGCTGACTTGTGGAGATGCAGCGAATGTGAAATCCCACGTATATGCCATTTCCCT
A_23_P51085	NM_020675	SPC25	Hs.421956	57405	hs|2q31.1	GO:0000278(mitotic cell cycle)|GO:0000777(condensed chromosome kinetochore)|GO:0005515(protein binding)|GO:0005634(nucleus)|GO:0005829(cytosol)|GO:0007052(mitotic spindle organization)|GO:0007059(chromosome segregation)|GO:0007067(mitosis)|GO:0031262(Ndc80 complex)	0.870661	0.673845	0.830356	1.02519	0.935628	1.11143	3.25928	3.75879	5.28569	7.12367	4.82846	5.18793	6	6	5.303	9.35e-07		SPC25, NDC80 kinetochore complex component	Homo sapiens SPC25, NDC80 kinetochore complex component (SPC25), mRNA [NM_020675]	GTAAGGAAGACCAACAATTTTTCAGCTTTTCTTGCCAATGTTCGGAAAGCTTTTACTGCC
A_33_P3389394	NR_002312	RPPH1	Hs.613102	85495	hs|14q11.2		1.00879	0.334839	0.436817	0.366938	0.440694	0.46829	2.65526	3.32126	2.26357	1.94357	2.3026	2.77668	6	6	5.301	2.76e-05		ribonuclease P RNA component H1	Homo sapiens ribonuclease P RNA component H1 (RPPH1), RNase P RNA [NR_002312]	AATGGCTGAGGTGAGGTACCCCGCAGGGGACCTCATAACCCAATTCAGACTACTCTCCTC
A_33_P3242649	NM_031217	KIF18A	Hs.301052	81930	hs|11p14.1	GO:0000278(mitotic cell cycle)|GO:0001726(ruffle)|GO:0003779(actin binding)|GO:0005515(protein binding)|GO:0005524(ATP binding)|GO:0005634(nucleus)|GO:0005737(cytoplasm)|GO:0005815(microtubule organizing center)|GO:0005828(kinetochore microtubule)|GO:0005829(cytosol)|GO:0005871(kinesin complex)|GO:0005901(caveola)|GO:0006200(ATP catabolic process)|GO:0007018(microtubule-based movement)|GO:0007019…	0.247797	0.192744	0.130248	0.15019	0.219256	0.276226	1.01867	1.35917	1.04969	0.827331	1.00377	1.03906	5	6	5.3	2.35e-06		kinesin family member 18A	Homo sapiens kinesin family member 18A (KIF18A), mRNA [NM_031217]	GCTTAGTTTTACTATGCCACAACAAGTTGACTAGGACATTTTAGTAAATGGTAGTGAGTT
A_24_P407235	NM_004075	CRY1	Hs.151573	1407	hs|12q23.3	GO:0000122(negative regulation of transcription from RNA polymerase II promoter)|GO:0000166(nucleotide binding)|GO:0000989(transcription factor binding transcription factor activity)|GO:0001047(core promoter binding)|GO:0003677(DNA binding)|GO:0003690(double-stranded DNA binding)|GO:0003904(deoxyribodipyrimidine photo-lyase activity)|GO:0003914(DNA (6-4) photolyase activity)|GO:0005515(protein bi…	0.206666	0.36602	0.398979	0.530196	0.335246	0.3659	1.61587	2.16092	1.48487	2.44766	1.64165	2.03932	6	6	5.279	2.27e-06		cryptochrome circadian clock 1	Homo sapiens cryptochrome circadian clock 1 (CRY1), mRNA [NM_004075]	ATTAGTATAGACCCATCGATATATTTTTGATAATTTTTCATGTATGGTAAAGTTAAAATG
A_24_P269062	NM_030964	SPRY4	Hs.323308	81848	hs|5q31.3	GO:0005515(protein binding)|GO:0005737(cytoplasm)|GO:0005794(Golgi apparatus)|GO:0007275(multicellular organismal development)|GO:0032587(ruffle membrane)|GO:0043407(negative regulation of MAP kinase activity)	1.43987	1.54618	1.56609	1.72168	1.5727	1.51151	7.43605	7.64341	8.72315	8.70214	7.97442	8.76695	6	6	5.258	2.96e-12		sprouty homolog 4 (Drosophila)	Homo sapiens sprouty homolog 4 (Drosophila) (SPRY4), transcript variant 1, mRNA [NM_030964]	TCGCCATCATACCTCGAGTGAGGCCCAGCTAGATAATGACTTGTCCAAGATGGCACACGT
A_23_P155969	NM_014264	PLK4	Hs.172052	10733	hs|4q28.2	GO:0000086(G2/M transition of mitotic cell cycle)|GO:0000278(mitotic cell cycle)|GO:0004674(protein serine/threonine kinase activity)|GO:0004713(protein tyrosine kinase activity)|GO:0005515(protein binding)|GO:0005524(ATP binding)|GO:0005730(nucleolus)|GO:0005813(centrosome)|GO:0005814(centriole)|GO:0005829(cytosol)|GO:0006468(protein phosphorylation)|GO:0007099(centriole replication)|GO:0018108(…	0.105146	0.164308	0.190095	0.345468	0.185253	0.162911	0.794264	1.09159	0.991542	0.819381	0.899526	1.09541	5	6	5.222	4.46e-05		polo-like kinase 4	Homo sapiens polo-like kinase 4 (PLK4), transcript variant 1, mRNA [NM_014264]	TTGTCTTCCTAAATCAGCACAACTTTTGAAATCTGTTTTTGTGAAAAATGTTGGTTGGGC
A_24_P226970	NM_014951	ZNF365	Hs.22653	22891	hs|10q21.2	GO:0005515(protein binding)|GO:0005737(cytoplasm)|GO:0005815(microtubule organizing center)	0.19336	0.043723	0.100361	0.122256	0.0915506	0.151875	0.409016	0.779924	0.579876	0.512999	0.433378	0.679752	4	6	5.183	0.00017		zinc finger protein 365	Homo sapiens zinc finger protein 365 (ZNF365), transcript variant A, mRNA [NM_014951]	GCTTTTTTGAAGAAATCACCAAAGTTTCTGGGAAACTATGTTCAAGGTTGAAATGGAGAG
A_24_P214231	NM_001048166	STIL	Hs.525198	6491	hs|1p33	GO:0000578(embryonic axis specification)|GO:0001701(in utero embryonic development)|GO:0001843(neural tube closure)|GO:0001947(heart looping)|GO:0005515(protein binding)|GO:0005813(centrosome)|GO:0005829(cytosol)|GO:0007224(smoothened signaling pathway)|GO:0007368(determination of left/right symmetry)|GO:0008283(cell proliferation)|GO:0021915(neural tube development)|GO:0030900(forebrain developm…	0.0365823	0.0847798	0.185386	0.123866	0.158728	0.0711598	0.544064	0.540073	0.615389	0.478457	0.506862	0.347204	2	6	5.162	0.000664		SCL/TAL1 interrupting locus	Homo sapiens SCL/TAL1 interrupting locus (STIL), transcript variant 1, mRNA [NM_001048166]	CTTAGATGTAAAACGTCTCAGACAGTTACCAAAATTATTTTAACCTTTTAACTCCCTGCC
A_23_P126212	NM_022111	CLSPN	Hs.175613	63967	hs|1p34.3	GO:0000077(DNA damage checkpoint)|GO:0003677(DNA binding)|GO:0005515(protein binding)|GO:0005654(nucleoplasm)|GO:0006260(DNA replication)|GO:0006281(DNA repair)|GO:0006915(apoptotic process)|GO:0006921(cellular component disassembly involved in apoptotic process)|GO:0010997(anaphase-promoting complex binding)|GO:0018105(peptidyl-serine phosphorylation)|GO:0031572(G2/M transition DNA damage checkp…	0.0369256	0.0348555	0.0463229	0.0438122	0.028423	0.063865	0.282792	0.144802	0.28497	0.324759	0.334069	0.0690423	0	4	5.14	0.000666		claspin	Homo sapiens claspin (CLSPN), transcript variant 1, mRNA [NM_022111]	TTCCCAGATGGACTTGTTCCACAGAGACTCTGATGATGATCAGACTGAAGAACAGCTTGA
A_23_P218463	NM_013376	SERTAD1	Hs.269898	29950	hs|19q13.2	GO:0000079(regulation of cyclin-dependent protein kinase activity)|GO:0005515(protein binding)|GO:0006351(transcription, DNA-dependent)|GO:0008284(positive regulation of cell proliferation)|GO:0045893(positive regulation of transcription, DNA-dependent)	16.3306	8.82919	9.39669	7.17865	8.27101	9.97063	52.6112	48.7973	46.478	55.2004	44.97	48.7981	6	6	5.12	1.36e-05		SERTA domain containing 1	Homo sapiens SERTA domain containing 1 (SERTAD1), mRNA [NM_013376]	GTCATAGCTTGGGCTGTTCCTTCTCTGATACGGGAAGAGACCCCAATCAGATTTTTCAAA
A_24_P140608	NM_001945	HBEGF	Hs.799	1839	hs|5q31.3	GO:0005154(epidermal growth factor receptor binding)|GO:0005576(extracellular region)|GO:0005615(extracellular space)|GO:0005887(integral to plasma membrane)|GO:0007165(signal transduction)|GO:0007173(epidermal growth factor receptor signaling pathway)|GO:0007517(muscle organ development)|GO:0008016(regulation of heart contraction)|GO:0008083(growth factor activity)|GO:0008201(heparin binding)|GO…	2.80453	2.86958	3.61389	3.56383	3.22264	3.10849	15.1896	17.7742	17.6799	16.6104	14.7804	15.7841	6	6	5.11	1.67e-10		heparin-binding EGF-like growth factor	Homo sapiens heparin-binding EGF-like growth factor (HBEGF), mRNA [NM_001945]	CCCATCTGTAGTAATTTATTGTCTGTCTACATTTCTGCAGATCTTCCGTGGTCAGAGTGC
A_33_P3441639	AK056793	LOC145694	Hs.147229	145694	hs|15q23		0.106703	0.0312312	0.0258138	0.0163978	0.059058	0.0376051	0.206552	0.168515	0.182317	0.400746	0.114645	0.178607	0	4	5.052	0.000777		uncharacterized LOC145694	Homo sapiens cDNA FLJ32231 fis, clone PLACE6004491. [AK056793]	TATTTATACCACACACAGGGATACTTGGCTTGGGAAAACTAAATAAACGTGAAGTCTTTC
A_23_P350689	NM_173570	ZDHHC23	Hs.21902	254887	hs|3q13.31	GO:0008270(zinc ion binding)|GO:0016021(integral to membrane)|GO:0018345(protein palmitoylation)|GO:0019706(protein-cysteine S-palmitoleyltransferase activity)|GO:0072659(protein localization in plasma membrane)	0.285851	0.458873	0.399254	0.45436	0.387229	0.488989	2.01111	1.94646	2.11834	2.57281	1.81233	1.88724	6	6	5.03	6.5e-08		zinc finger, DHHC-type containing 23	Homo sapiens zinc finger, DHHC-type containing 23 (ZDHHC23), mRNA [NM_173570]	CCTGCAGTCTCAACTCATTGTGATCCTAATGGTCTGGGTGATTGGATGGTTTGAGTTGTT
A_23_P70670	NM_004233	CD83	Hs.595133	9308	hs|6p23	GO:0005886(plasma membrane)|GO:0005887(integral to plasma membrane)|GO:0006952(defense response)|GO:0006959(humoral immune response)|GO:0007165(signal transduction)|GO:0009897(external side of plasma membrane)|GO:0014070(response to organic cyclic compound)|GO:0032713(negative regulation of interleukin-4 production)|GO:0032733(positive regulation of interleukin-10 production)|GO:0032743(positive …	0.0858819	0.106141	0.0746215	0.0634544	0.071487	0.0850113	0.325669	0.459418	0.389476	0.53563	0.32419	0.414476	1	6	5.019	4.16e-08		CD83 molecule	Homo sapiens CD83 molecule (CD83), transcript variant 1, mRNA [NM_004233]	GCAGAAGGGACTTCACGAAGTGTTGCATGGATGTTTTAGCCATTGTTGGCTTTCCCTTAT
A_23_P254165	NM_021785	RAI2	Hs.446680	10742	hs|Xp22.13	GO:0003674(molecular_function)|GO:0005515(protein binding)|GO:0005575(cellular_component)|GO:0009790(embryo development)	3.41806	3.02389	2.95979	2.7103	2.60834	3.03959	13.5691	15.3678	14.3519	16.9527	14.0623	14.7344	6	6	5.019	4.1e-11		retinoic acid induced 2	Homo sapiens retinoic acid induced 2 (RAI2), transcript variant 2, mRNA [NM_021785]	GGAGTAGTTGGGAAATGGAAAGGTGAATTGGCTCTAGAGGCCCTGTATGCTAGTATCATT
A_23_P2801	NM_172373	ELF1	Hs.135646	1997	hs|13q14.11	GO:0000978(RNA polymerase II core promoter proximal region sequence-specific DNA binding)|GO:0000981(sequence-specific DNA binding RNA polymerase II transcription factor activity)|GO:0001077(RNA polymerase II core promoter proximal region sequence-specific DNA binding transcription factor activity involved in positive regulation of transcription)|GO:0001817(regulation of cytokine production)|GO:0…	0.607733	3.82195	3.45601	4.02312	3.06338	2.33598	12.6863	12.3735	13.5684	13.5006	12.8429	9.97198	6	6	5.016	0.00241		E74-like factor 1 (ets domain transcription factor)	Homo sapiens E74-like factor 1 (ets domain transcription factor) (ELF1), transcript variant 1, mRNA [NM_172373]	TTAAAGCATCAGCCTAAGAATGGCACTCCCACTAACTAGCCATGTAATCTTGACCTCTTT
A_23_P365738	NM_015193	ARC	Hs.40888	23237	hs|8q24.3	GO:0001669(acrosomal vesicle)|GO:0005737(cytoplasm)|GO:0005768(endosome)|GO:0005886(plasma membrane)|GO:0006897(endocytosis)|GO:0007010(cytoskeleton organization)|GO:0007492(endoderm development)|GO:0007612(learning)|GO:0009952(anterior/posterior pattern specification)|GO:0014069(postsynaptic density)|GO:0015629(actin cytoskeleton)|GO:0016477(cell migration)|GO:0022604(regulation of cell morphoge…	0.043072	0.0234647	0.0717975	0.0920615	0.0304262	0.0466187	0.236397	0.253645	0.252385	0.257185	0.140858	0.273942	0	5	5.012	0.000194		activity-regulated cytoskeleton-associated protein	Homo sapiens activity-regulated cytoskeleton-associated protein (ARC), mRNA [NM_015193]	CCCACAGATTTTATTTTTGCACATAAGCCATAACCAATCCTCAAGGCTGGCACAGGCTTT
A_23_P99292	NM_006479	RAD51AP1	Hs.730696	10635	hs|12p13.32	GO:0000724(double-strand break repair via homologous recombination)|GO:0003690(double-stranded DNA binding)|GO:0003697(single-stranded DNA binding)|GO:0003723(RNA binding)|GO:0005515(protein binding)|GO:0005634(nucleus)|GO:0006281(DNA repair)|GO:0010569(regulation of double-strand break repair via homologous recombination)|GO:0071479(cellular response to ionizing radiation)	0.11303	0.352364	0.250178	0.399822	0.343605	0.276763	1.22342	1.47866	1.8166	1.23579	1.44334	1.00315	5	6	4.994	0.00011		RAD51 associated protein 1	Homo sapiens RAD51 associated protein 1 (RAD51AP1), transcript variant 2, mRNA [NM_006479]	GGTTGGGAGAATCACAGCTTTACAAGGGTGTTTATATTTGATTTGTGTTTATATTTGAGG
A_23_P118834	NM_001067	TOP2A	Hs.156346	7153	hs|17q21.2	GO:0000228(nuclear chromosome)|GO:0000278(mitotic cell cycle)|GO:0000287(magnesium ion binding)|GO:0000712(resolution of meiotic recombination intermediates)|GO:0000793(condensed chromosome)|GO:0000819(sister chromatid segregation)|GO:0003677(DNA binding)|GO:0003682(chromatin binding)|GO:0003918(DNA topoisomerase (ATP-hydrolyzing) activity)|GO:0005080(protein kinase C binding)|GO:0005515(protein …	0.18334	0.926791	0.912217	1.10133	0.768815	0.597859	3.36808	3.52118	3.7718	3.56618	3.12689	2.4139	6	6	4.985	0.00144		topoisomerase (DNA) II alpha 170kDa	Homo sapiens topoisomerase (DNA) II alpha 170kDa (TOP2A), mRNA [NM_001067]	TGTGAGGCGATTATTTTAAGTAATTATCTTACCAAGCCCAAGACTGGTTTTAAAGTTACC
A_23_P254733	NM_024629	CENPU	Hs.575032	79682	hs|4q35.1	GO:0000278(mitotic cell cycle)|GO:0000777(condensed chromosome kinetochore)|GO:0005634(nucleus)|GO:0005654(nucleoplasm)|GO:0005815(microtubule organizing center)|GO:0005829(cytosol)|GO:0006334(nucleosome assembly)|GO:0006351(transcription, DNA-dependent)|GO:0006355(regulation of transcription, DNA-dependent)|GO:0016032(viral reproduction)|GO:0034080(CenH3-containing nucleosome assembly at centrom…	1.07069	0.968442	1.0121	1.27571	1.23599	1.20428	4.91472	6.30085	5.50242	7.07789	5.56151	4.47429	6	6	4.969	1.29e-08		centromere protein U	Homo sapiens centromere protein U (CENPU), transcript variant 1, mRNA [NM_024629]	GCTGTTACCTTCTGAAACTGTACCTTTATAAATCAATTGTTTTGCAAAGAAGTTATGGCC
A_23_P129695	NM_138440	VASN	Hs.372579	114990	hs|16p13.3	GO:0005615(extracellular space)|GO:0005739(mitochondrion)|GO:0005765(lysosomal membrane)|GO:0005886(plasma membrane)|GO:0009986(cell surface)|GO:0010719(negative regulation of epithelial to mesenchymal transition)|GO:0016021(integral to membrane)|GO:0030512(negative regulation of transforming growth factor beta receptor signaling pathway)|GO:0050431(transforming growth factor beta binding)|GO:007…	0.124818	0.0906691	0.0559315	0.150579	0.0563268	0.128475	0.430747	0.711882	0.502809	0.382761	0.340314	0.494272	2	6	4.932	4.83e-05		vasorin	Homo sapiens vasorin (VASN), mRNA [NM_138440]	TATTCTGGGAAGATGTTTTTCAAACTCAGAGACAAGGACTTTGGTTTTTGTAAGACAAAC
A_23_P356684	NM_018685	ANLN	Hs.62180	54443	hs|7p14.2	GO:0000281(cytokinesis after mitosis)|GO:0000921(septin ring assembly)|GO:0003779(actin binding)|GO:0005634(nucleus)|GO:0005730(nucleolus)|GO:0005826(actomyosin contractile ring)|GO:0007067(mitosis)|GO:0007096(regulation of exit from mitosis)|GO:0015629(actin cytoskeleton)|GO:0043231(intracellular membrane-bounded organelle)	0.630451	1.97307	2.28875	2.99209	1.9059	1.53496	6.85488	9.34776	9.2129	7.12775	9.13064	9.27582	6	6	4.927	0.000506		anillin, actin binding protein	Homo sapiens anillin, actin binding protein (ANLN), transcript variant 1, mRNA [NM_018685]	TCTCCAATCTCAGTAGTTTTTTCGAAAGGCTGTGATCATTTATTGATCGTGATATGACTT
A_23_P53891	NM_001730	KLF5	Hs.508234	688	hs|13q22.1	GO:0000978(RNA polymerase II core promoter proximal region sequence-specific DNA binding)|GO:0001077(RNA polymerase II core promoter proximal region sequence-specific DNA binding transcription factor activity involved in positive regulation of transcription)|GO:0001525(angiogenesis)|GO:0005515(protein binding)|GO:0005634(nucleus)|GO:0005730(nucleolus)|GO:0005737(cytoplasm)|GO:0005794(Golgi appara…	0.0381268	0.11493	0.133078	0.154947	0.0929279	0.0590584	0.392838	0.501045	0.517181	0.45395	0.393631	0.370471	3	6	4.885	0.000518		Kruppel-like factor 5 (intestinal)	Homo sapiens Kruppel-like factor 5 (intestinal) (KLF5), transcript variant 1, mRNA [NM_001730]	CGTTGAATTGATGATGCAGTTTTCATATATCGAGATGTTCGCTCGTGCAGTACTGTTGGT
A_24_P154037	NM_003749	IRS2	Hs.442344	8660	hs|13q34	GO:0002053(positive regulation of mesenchymal cell proliferation)|GO:0002903(negative regulation of B cell apoptotic process)|GO:0004871(signal transducer activity)|GO:0005158(insulin receptor binding)|GO:0005515(protein binding)|GO:0005829(cytosol)|GO:0005886(plasma membrane)|GO:0006006(glucose metabolic process)|GO:0007165(signal transduction)|GO:0007173(epidermal growth factor receptor signali…	0.10852	0.187685	0.151018	0.226261	0.209253	0.139165	0.689844	0.929058	0.834744	0.82714	0.919281	0.663148	5	6	4.868	2.96e-06		insulin receptor substrate 2	Homo sapiens insulin receptor substrate 2 (IRS2), mRNA [NM_003749]	GATGGTTCGTGTTCATACTGCAGCTTAAAACAAGCAAAATACACAGATGATAATATGCTA
A_21_P0000142	NM_001198952	RNF103	Hs.469199	7844	hs|2p11.2	GO:0004842(ubiquitin-protein ligase activity)|GO:0005515(protein binding)|GO:0005783(endoplasmic reticulum)|GO:0005789(endoplasmic reticulum membrane)|GO:0007417(central nervous system development)|GO:0008270(zinc ion binding)|GO:0016021(integral to membrane)|GO:0016567(protein ubiquitination)|GO:0016874(ligase activity)|GO:0030433(ER-associated protein catabolic process)	0.0667728	0.0578325	0.066134	0.0132957	0.0299162	0.0482359	0.167224	0.166075	0.205955	0.306354	0.180143	0.205446	0	5	4.864	0.000981		ring finger protein 103	Homo sapiens ring finger protein 103 (RNF103), transcript variant 3, mRNA [NM_001198952]	CTGCTATGGAGGTGAAGCACATAGCAAGCCACTTTATCTTATATTTTGTATTGGTAAAAA
A_33_P3379454	NM_001290050	UHRF1	Hs.108106	29128	hs|19p13.3	GO:0000122(negative regulation of transcription from RNA polymerase II promoter)|GO:0000790(nuclear chromatin)|GO:0000791(euchromatin)|GO:0000792(heterochromatin)|GO:0000987(core promoter proximal region sequence-specific DNA binding)|GO:0003700(sequence-specific DNA binding transcription factor activity)|GO:0004842(ubiquitin-protein ligase activity)|GO:0005515(protein binding)|GO:0005634(nucleus…	0.113656	0.988725	0.943318	1.14654	0.802146	0.550942	3.30436	3.26528	3.16106	3.50716	2.778	2.13764	5	6	4.863	0.00582		ubiquitin-like with PHD and ring finger domains 1	Homo sapiens ubiquitin-like with PHD and ring finger domains 1 (UHRF1), transcript variant 3, mRNA [NM_001290050]	GGCTTAACTTAAACAGGTAGTGTTTCCTCCGTTCCCTAAAAAGGTTTGTCTTCCTTTTTT
A_23_P217319	NM_004114	FGF13	Hs.6540	2258	hs|Xq26.3	GO:0000165(MAPK cascade)|GO:0001764(neuron migration)|GO:0005515(protein binding)|GO:0005576(extracellular region)|GO:0005634(nucleus)|GO:0005730(nucleolus)|GO:0005737(cytoplasm)|GO:0005874(microtubule)|GO:0005886(plasma membrane)|GO:0007026(negative regulation of microtubule depolymerization)|GO:0007165(signal transduction)|GO:0007267(cell-cell signaling)|GO:0007399(nervous system development)|G…	0.15595	0.0669555	0.0643491	0.0574175	0.0269637	0.116844	0.339609	0.31613	0.320321	0.472216	0.310655	0.318432	0	6	4.862	0.00104		fibroblast growth factor 13	Homo sapiens fibroblast growth factor 13 (FGF13), transcript variant 1, mRNA [NM_004114]	TTGCATGGAAGAAAGTTGGGTTCTTGGCATAGAGTTGCATGATATGTAAGATTTTGTGCA
A_23_P252306	NM_002165	ID1	Hs.504609	3397	hs|20q11.21	GO:0000122(negative regulation of transcription from RNA polymerase II promoter)|GO:0001525(angiogenesis)|GO:0001886(endothelial cell morphogenesis)|GO:0003700(sequence-specific DNA binding transcription factor activity)|GO:0005515(protein binding)|GO:0005634(nucleus)|GO:0005654(nucleoplasm)|GO:0005730(nucleolus)|GO:0005794(Golgi apparatus)|GO:0006351(transcription, DNA-dependent)|GO:0007179(tran…	39.5292	42.9219	35.1722	34.6017	36.9492	38.8394	167.138	164.344	205.427	213.858	177.239	181.486	6	6	4.855	2.35e-10		inhibitor of DNA binding 1, dominant negative helix-loop-helix protein	Homo sapiens inhibitor of DNA binding 1, dominant negative helix-loop-helix protein (ID1), transcript variant 1, mRNA [NM_002165]	GCAGACATTTTAAAAAATGGTCACGTTTGGTGCTTCTCAGATTTCTGAGGAAATTGCTTT
A_33_P3531206	NM_001014442	C1QTNF9B-AS1	Hs.642624	542767	hs|13q12.12	GO:0005737(cytoplasm)	0.0370722	0.0405332	0.0616699	0.0799296	0.0279837	0.0713076	0.24268	0.191457	0.341499	0.184554	0.178779	0.34957	0	4	4.81	3.4e-05		C1QTNF9B antisense RNA 1	Homo sapiens C1QTNF9B antisense RNA 1 (C1QTNF9B-AS1), transcript variant 1, mRNA [NM_001014442]	GTATTTTTACTCCGTTTTTGACCAAAGACACCTGAACATTCCTGGAGAAAACAGTGATGT
A_33_P3351566	NM_001039481	ETNK1	Hs.29464	55500	hs|12p12.1	GO:0004305(ethanolamine kinase activity)|GO:0005524(ATP binding)|GO:0005829(cytosol)|GO:0006644(phospholipid metabolic process)|GO:0006646(phosphatidylethanolamine biosynthetic process)|GO:0016310(phosphorylation)|GO:0044281(small molecule metabolic process)|GO:0046474(glycerophospholipid biosynthetic process)	0.12909	0.133592	0.114964	0.128278	0.0456898	0.157883	0.42743	0.499299	0.475848	0.66502	0.50146	0.668849	3	6	4.808	0.00012		ethanolamine kinase 1	Homo sapiens ethanolamine kinase 1 (ETNK1), transcript variant 2, mRNA [NM_001039481]	CTTAATTGTTCATGTTTTCAGAGTTCTTGCCTATTAAAATTTTATTAATTTGGTTAACAA
A_23_P82108	NM_020861	ZBTB2	Hs.520073	57621	hs|6q25.1	GO:0003677(DNA binding)|GO:0005634(nucleus)|GO:0006351(transcription, DNA-dependent)|GO:0006355(regulation of transcription, DNA-dependent)|GO:0046872(metal ion binding)	1.04852	1.23072	1.43204	1.23045	1.19049	1.12535	5.60953	6.58979	5.31593	5.96566	5.15179	6.20028	6	6	4.804	1.22e-10		zinc finger and BTB domain containing 2	Homo sapiens zinc finger and BTB domain containing 2 (ZBTB2), mRNA [NM_020861]	TTAGTATTCATCCTCCAGGTGTCTTACTTCAGAATGCATCCTTTGAGATTATGTCCACTT
A_24_P413884	NM_001809	CENPA	Hs.1594	1058	hs|2p23.3	GO:0000132(establishment of mitotic spindle orientation)|GO:0000278(mitotic cell cycle)|GO:0000775(chromosome, centromeric region)|GO:0000778(condensed nuclear chromosome kinetochore)|GO:0000780(condensed nuclear chromosome, centromeric region)|GO:0000786(nucleosome)|GO:0000939(condensed chromosome inner kinetochore)|GO:0003677(DNA binding)|GO:0003682(chromatin binding)|GO:0005515(protein binding…	0.165525	0.292075	0.345806	0.532915	0.26986	0.195992	1.00449	1.58156	1.82243	1	1.356	1.45877	6	6	4.795	4.28e-05		centromere protein A	Homo sapiens centromere protein A (CENPA), transcript variant 1, mRNA [NM_001809]	TAGTTTGTGAGTTACTCATGTGACTATTTGAGGATTTTGAAAACATCAGATTTGCTGTGG
A_19_P00809417	ENST00000570163	ATF7IP2	Hs.742019	80063	hs|16p13.2	GO:0005634(nucleus)|GO:0006351(transcription, DNA-dependent)|GO:0006355(regulation of transcription, DNA-dependent)	0.523578	0.655166	0.552927	0.432334	0.50144	0.525494	2.59488	2.60028	2.37963	2.58747	2.43275	2.56835	6	6	4.786	2.37e-07		activating transcription factor 7 interacting protein 2	activating transcription factor 7 interacting protein 2 [Source:HGNC Symbol;Acc:20397] [ENST00000570163]	AATGTTCTGCTTTCCTTGCCTTATGCCTGTACTTCACCTCAGCCTTCAATTCCATTGTGT
A_23_P66732	NM_031965	GSG2	Hs.534059	83903	hs|17p13.2	GO:0003677(DNA binding)|GO:0004672(protein kinase activity)|GO:0005515(protein binding)|GO:0005524(ATP binding)|GO:0005634(nucleus)|GO:0005694(chromosome)|GO:0005737(cytoplasm)|GO:0005813(centrosome)|GO:0005819(spindle)|GO:0006468(protein phosphorylation)|GO:0007064(mitotic sister chromatid cohesion)|GO:0035556(intracellular signal transduction)|GO:0071459(protein localization to chromosome, cent…	0.0573334	0.0698013	0.101042	0.152236	0.094369	0.0977616	0.376785	0.367776	0.58676	0.604559	0.434707	0.308982	1	6	4.76	6.51e-06		germ cell associated 2 (haspin)	Homo sapiens germ cell associated 2 (haspin) (GSG2), mRNA [NM_031965]	ACAACCGCTGGGGTGAATATCACCCTTATAGTAATGTGCTCTGGTTACATTACCTGACAG
A_23_P258944	NM_012328	DNAJB9	Hs.741182	4189	hs|7q31.1	GO:0005515(protein binding)|GO:0005730(nucleolus)|GO:0005737(cytoplasm)|GO:0005783(endoplasmic reticulum)|GO:0005788(endoplasmic reticulum lumen)|GO:0005789(endoplasmic reticulum membrane)|GO:0006987(activation of signaling protein activity involved in unfolded protein response)|GO:0030433(ER-associated protein catabolic process)|GO:0030968(endoplasmic reticulum unfolded protein response)|GO:0044…	0.836663	4.29844	3.10236	3.70498	3.61045	2.91555	14.4659	16.0808	13.3422	15.5211	10.5794	9.78578	6	6	4.748	0.000858		DnaJ (Hsp40) homolog, subfamily B, member 9	Homo sapiens DnaJ (Hsp40) homolog, subfamily B, member 9 (DNAJB9), mRNA [NM_012328]	ATTTCTTTCTTAGTTGTTGGCACTCTTAGGTCTTAGTATGGATTTATGTGTTTGTGTGTG
A_33_P3386262	NM_030928	CDT1	Hs.122908	81620	hs|16q24.3	GO:0000076(DNA replication checkpoint)|GO:0000082(G1/S transition of mitotic cell cycle)|GO:0000083(regulation of transcription involved in G1/S phase of mitotic cell cycle)|GO:0000278(mitotic cell cycle)|GO:0003677(DNA binding)|GO:0005515(protein binding)|GO:0005634(nucleus)|GO:0005654(nucleoplasm)|GO:0005829(cytosol)|GO:0006260(DNA replication)|GO:0030174(regulation of DNA-dependent DNA replica…	2.22429	1.02451	1.01326	1.01136	1.16683	1.06714	5.14227	5.93925	5.78802	5.42873	5.54866	6.01699	6	6	4.717	4.28e-05		chromatin licensing and DNA replication factor 1	Homo sapiens chromatin licensing and DNA replication factor 1 (CDT1), mRNA [NM_030928]	CACCTTGACTTCAGTATTTCTGACCTCCTAAACTCTAATAAAGTCATGCTTACAGCCACT
A_23_P92441	NM_002358	MAD2L1	Hs.591697	4085	hs|4q27	GO:0000070(mitotic sister chromatid segregation)|GO:0000278(mitotic cell cycle)|GO:0000776(kinetochore)|GO:0000777(condensed chromosome kinetochore)|GO:0000922(spindle pole)|GO:0005515(protein binding)|GO:0005634(nucleus)|GO:0005643(nuclear pore)|GO:0005829(cytosol)|GO:0007093(mitotic cell cycle checkpoint)|GO:0007094(mitotic cell cycle spindle assembly checkpoint)|GO:0031145(anaphase-promoting c…	2.15347	3.77155	4.12849	3.54513	3.14872	2.96132	12.3247	14.1029	18.1652	16.7083	17.0253	13.4073	6	6	4.706	3.38e-07		MAD2 mitotic arrest deficient-like 1 (yeast)	Homo sapiens MAD2 mitotic arrest deficient-like 1 (yeast) (MAD2L1), mRNA [NM_002358]	TGTACCTGAAAAATGGGAAGAGTCGGGACCACAGTTTATTACCAATTCTGAGGAAGTCCG
A_24_P332647	NM_001161331	SSH1	Hs.199763	54434	hs|12q24.11	GO:0000902(cell morphogenesis)|GO:0003677(DNA binding)|GO:0003779(actin binding)|GO:0004721(phosphoprotein phosphatase activity)|GO:0004725(protein tyrosine phosphatase activity)|GO:0005515(protein binding)|GO:0005634(nucleus)|GO:0005730(nucleolus)|GO:0005737(cytoplasm)|GO:0005856(cytoskeleton)|GO:0005886(plasma membrane)|GO:0006470(protein dephosphorylation)|GO:0008064(regulation of actin polyme…	0.147146	0.131436	0.124222	0.153225	0.127827	0.176184	0.548683	0.495413	0.724255	0.818108	0.718174	0.775277	6	6	4.703	1.16e-07		slingshot protein phosphatase 1	Homo sapiens slingshot protein phosphatase 1 (SSH1), transcript variant 3, mRNA [NM_001161331]	GGGTACGTAGTGCATACCTTATATAGCAAATTGAGAATCTGTTGGGAATAACACATATCT
A_24_P183128	NM_016619	PLAC8	Hs.546392	51316	hs|4q21.22	GO:0003682(chromatin binding)|GO:0008284(positive regulation of cell proliferation)|GO:0009409(response to cold)|GO:0040015(negative regulation of multicellular organism growth)|GO:0042742(defense response to bacterium)|GO:0043066(negative regulation of apoptotic process)|GO:0045944(positive regulation of transcription from RNA polymerase II promoter)|GO:0050873(brown fat cell differentiation)	0.0364815	0.0470933	0.0525453	0.0748052	0.0434359	0.101525	0.306652	0.225384	0.435313	0.22978	0.157002	0.294926	0	5	4.698	2.48e-05		placenta-specific 8	Homo sapiens placenta-specific 8 (PLAC8), transcript variant 2, mRNA [NM_016619]	TAAAAACTGATGGTGAAAAGCTCTTACCGAAGCAACAAAATTCAGCAGACACCTCTTCAG
A_23_P259586	NM_003318	TTK	Hs.169840	7272	hs|6q14.1	GO:0004674(protein serine/threonine kinase activity)|GO:0004712(protein serine/threonine/tyrosine kinase activity)|GO:0004713(protein tyrosine kinase activity)|GO:0005515(protein binding)|GO:0005524(ATP binding)|GO:0005819(spindle)|GO:0007051(spindle organization)|GO:0007052(mitotic spindle organization)|GO:0007094(mitotic cell cycle spindle assembly checkpoint)|GO:0008284(positive regulation of …	0.158418	0.279402	0.323482	0.325716	0.321727	0.238357	1.28886	1.44711	1.11411	1.26653	1.33668	1.08764	5	6	4.694	9.04e-06		TTK protein kinase	Homo sapiens TTK protein kinase (TTK), transcript variant 1, mRNA [NM_003318]	TGTTTGGTCCTTAGGATGTATTTTGTACTATATGACTTACGGGAAAACACCATTTCAGCA
A_23_P304450	NM_005257	GATA6	Hs.514746	2627	hs|18q11.2	GO:0000122(negative regulation of transcription from RNA polymerase II promoter)|GO:0000979(RNA polymerase II core promoter sequence-specific DNA binding)|GO:0000981(sequence-specific DNA binding RNA polymerase II transcription factor activity)|GO:0001103(RNA polymerase II repressing transcription factor binding)|GO:0001701(in utero embryonic development)|GO:0001889(liver development)|GO:0003148(…	10.8152	6.059	5.89343	6.69067	6.60938	6.83795	35.2242	39.1094	25.691	34.6047	30.9528	32.9081	6	6	4.693	2.81e-07		GATA binding protein 6	Homo sapiens GATA binding protein 6 (GATA6), mRNA [NM_005257]	GGTATCTGTAAACACTCTGATGAAGTCTGTATAGTGTGACTAACCCACAGGCAGGTTGGT
A_23_P34946	NM_014388	DIEXF	Hs.194754	27042	hs|1q32.2	GO:0005730(nucleolus)|GO:0007275(multicellular organismal development)	0.56755	0.72566	0.71453	0.79867	0.661222	0.640905	3.562	3.68662	3.06705	3.38677	2.55412	3.03093	6	6	4.687	1.57e-09		digestive organ expansion factor homolog (zebrafish)	Homo sapiens digestive organ expansion factor homolog (zebrafish) (DIEXF), mRNA [NM_014388]	TTTTTTCCCCACTTAAGGCTCAACTATTGGAATACATCTACCATGTCTCCTATGAAACTT
A_24_P287941	NM_013290	PSMC3IP	Hs.383019	29893	hs|17q21.2	GO:0003677(DNA binding)|GO:0005575(cellular_component)|GO:0005634(nucleus)|GO:0006310(DNA recombination)|GO:0007126(meiosis)|GO:0030374(ligand-dependent nuclear receptor transcription coactivator activity)|GO:2001141(regulation of RNA biosynthetic process)	0.557182	0.359476	0.410832	0.763843	0.669668	0.534593	1.99884	2.63009	3.20066	1.89579	2.7871	2.65722	6	6	4.679	1.83e-06		PSMC3 interacting protein	Homo sapiens PSMC3 interacting protein (PSMC3IP), transcript variant 1, mRNA [NM_013290]	AAATTGCAGTAGCTTGAGGTTAACATTTAGACTTGGAACAATGCTAAAGGAAAGCATTTG
A_24_P38951	NM_032871	RELT	Hs.533720	84957	hs|11q13.4	GO:0005737(cytoplasm)|GO:0005886(plasma membrane)|GO:0016021(integral to membrane)|GO:0070062(extracellular vesicular exosome)	6.22405	4.75576	5.53553	4.14845	4.29573	4.34085	26.8329	27.7883	19.6223	21.7304	18.8048	22.1679	6	6	4.676	1.32e-08		RELT tumor necrosis factor receptor	Homo sapiens RELT tumor necrosis factor receptor (RELT), transcript variant 1, mRNA [NM_032871]	ATTGCCCTATCCTTGTGTCTCCACCCCCTTCCATGTGTTGAATAATAAAAGGTGGGAAAG
A_23_P66694	NM_006495	EVI2B	Hs.5509	2124	hs|17q11.2	GO:0005887(integral to plasma membrane)	0.0326364	0.0745278	0.0680576	0.0818087	0.0567159	0.0622527	0.24749	0.199213	0.297331	0.370812	0.294548	0.304707	1	6	4.657	6.73e-06		ecotropic viral integration site 2B	Homo sapiens ecotropic viral integration site 2B (EVI2B), mRNA [NM_006495]	CACAAAACGTACATCAATCATTTCACTTACACCCTGGAAACCAAGCAAAAGCACACTTTT
A_23_P128375	NM_032829	FAM222A	Hs.661785	84915	hs|12q24.11		0.377147	0.256101	0.270362	0.251689	0.276689	0.323293	1.33655	1.23703	1.22337	1.57404	1.30928	1.38388	6	6	4.627	2.93e-08		family with sequence similarity 222, member A	Homo sapiens family with sequence similarity 222, member A (FAM222A), mRNA [NM_032829]	TGTCCCACACGATCAAGGCAGGGAAAGATAGGCAGGAGTCCCCTCACGAAGTCCTCAAGT
A_23_P53126	NM_005574	LMO2	Hs.34560	4005	hs|11p13	GO:0000977(RNA polymerase II regulatory region sequence-specific DNA binding)|GO:0000981(sequence-specific DNA binding RNA polymerase II transcription factor activity)|GO:0001102(RNA polymerase II activating transcription factor binding)|GO:0001190(RNA polymerase II transcription factor binding transcription factor activity involved in positive regulation of transcription)|GO:0001228(RNA polymera…	11.0791	8.89654	8.23461	7.52771	9.0029	8.80507	37.9372	42.0882	41.6473	44.8973	38.6508	40.5265	6	6	4.615	2.1e-08		LIM domain only 2 (rhombotin-like 1)	Homo sapiens LIM domain only 2 (rhombotin-like 1) (LMO2), transcript variant 1, mRNA [NM_005574]	GATGAATCACTGTTTTTAGACACCTTCATTTTGAGGGGAGGAGTTCCACAGATTGTTTCT
A_23_P388812	NM_152515	CKAP2L	Hs.434250	150468	hs|2q13	GO:0000922(spindle pole)|GO:0005737(cytoplasm)|GO:0005813(centrosome)	0.314479	0.488083	0.464365	0.644477	0.690163	0.619028	2.2547	2.58953	1.88794	2.99722	2.39579	2.39194	6	6	4.614	5.15e-06		cytoskeleton associated protein 2-like	Homo sapiens cytoskeleton associated protein 2-like (CKAP2L), mRNA [NM_152515]	TCTCCTCAGATGAAACACAATCCTGAATTGGCATGGTCGTCTAGCTTTTATATTCAAACC
A_24_P253251	NM_003045	SLC7A1	Hs.14846	6541	hs|13q12.3	GO:0003333(amino acid transmembrane transport)|GO:0005886(plasma membrane)|GO:0005887(integral to plasma membrane)|GO:0006810(transport)|GO:0006811(ion transport)|GO:0006865(amino acid transport)|GO:0015181(arginine transmembrane transporter activity)|GO:0015809(arginine transport)|GO:0055085(transmembrane transport)	1.29474	1.63121	1.79549	2.4967	2.15589	1.52356	5.74214	9.27452	9.38928	7.34753	8.43093	9.26744	6	6	4.58	3.88e-07		solute carrier family 7 (cationic amino acid transporter, y+ system), member 1	Homo sapiens solute carrier family 7 (cationic amino acid transporter, y+ system), member 1 (SLC7A1), mRNA [NM_003045]	CAAGGCAAATGATTTTGTGTTTCTTGATGACAGACTATTAAGTTTGGGACTTATTTTCCC
A_33_P3217819	NM_057749	CCNE2	Hs.521693	9134	hs|8q22.1	GO:0000075(cell cycle checkpoint)|GO:0000079(regulation of cyclin-dependent protein kinase activity)|GO:0000082(G1/S transition of mitotic cell cycle)|GO:0000278(mitotic cell cycle)|GO:0005515(protein binding)|GO:0005654(nucleoplasm)|GO:0005829(cytosol)|GO:0006270(DNA-dependent DNA replication initiation)|GO:0016538(cyclin-dependent protein kinase regulator activity)|GO:0019901(protein kinase bin…	0.0293286	0.0191873	0.112076	0.0799347	0.0630613	0.0226331	0.150006	0.256617	0.1878	0.131218	0.233386	0.298884	2	5	4.577	0.00238		cyclin E2	Homo sapiens cyclin E2 (CCNE2), mRNA [NM_057749]	GAAGATTCCTATGGAAGACAGACATAATATCCAGACACATACAAACTATTTGGCTATGCT
A_33_P3337144	NM_001033723	ZNF704	Hs.434957	619279	hs|8q21.13	GO:0046872(metal ion binding)	0.234774	0.111832	0.0764278	0.0859209	0.0796921	0.0796039	0.480197	0.425938	0.409813	0.512377	0.498834	0.463103	3	6	4.567	0.000261		zinc finger protein 704	Homo sapiens zinc finger protein 704 (ZNF704), mRNA [NM_001033723]	GCCACCCAGAAAGCTATGAATTCCAATATACACCACTGATCGTGCAAGTTAGGGTTTTTT
A_23_P52207	NM_012342	BAMBI	Hs.533336	25805	hs|10p12.1	GO:0005109(frizzled binding)|GO:0005114(type II transforming growth factor beta receptor binding)|GO:0005737(cytoplasm)|GO:0005886(plasma membrane)|GO:0007179(transforming growth factor beta receptor signaling pathway)|GO:0008284(positive regulation of cell proliferation)|GO:0008360(regulation of cell shape)|GO:0010718(positive regulation of epithelial to mesenchymal transition)|GO:0016021(integr…	6.93177	4.96885	4.73263	4.06773	4.00174	4.35275	21.6128	24.3016	21.1732	22.7143	20.266	20.3178	6	6	4.561	1.82e-06		BMP and activin membrane-bound inhibitor	Homo sapiens BMP and activin membrane-bound inhibitor (BAMBI), mRNA [NM_012342]	AAGACTTTGTACACACTGTCACCAGGGTTATTTGCATCCAAGGGAGCTGGAATTGAGTAC
A_24_P227091	NM_004523	KIF11	Hs.8878	3832	hs|10q23.33	GO:0000922(spindle pole)|GO:0003777(microtubule motor activity)|GO:0005524(ATP binding)|GO:0005737(cytoplasm)|GO:0005819(spindle)|GO:0005829(cytosol)|GO:0005871(kinesin complex)|GO:0005874(microtubule)|GO:0005876(spindle microtubule)|GO:0007018(microtubule-based movement)|GO:0007051(spindle organization)|GO:0007052(mitotic spindle organization)|GO:0007067(mitosis)|GO:0007100(mitotic centrosome se…	1.78437	1.95536	2.03254	1.85171	1.71422	1.69454	8.70137	9.13405	6.56648	9.63539	8.1454	8.11818	6	6	4.537	1.42e-08		kinesin family member 11	Homo sapiens kinesin family member 11 (KIF11), mRNA [NM_004523]	ACACTCCAAGACCTGTGCCTTTTAGAGAAGCTCACAATGATTTAAGGACTGTTTGAAACT
A_33_P3311755	NM_138555	KIF23	Hs.270845	9493	hs|15q23	GO:0000022(mitotic spindle elongation)|GO:0000278(mitotic cell cycle)|GO:0000910(cytokinesis)|GO:0003777(microtubule motor activity)|GO:0005515(protein binding)|GO:0005524(ATP binding)|GO:0005634(nucleus)|GO:0005654(nucleoplasm)|GO:0005730(nucleolus)|GO:0005813(centrosome)|GO:0005819(spindle)|GO:0005829(cytosol)|GO:0005871(kinesin complex)|GO:0005874(microtubule)|GO:0007018(microtubule-based move…	0.127141	0.560513	0.595987	0.752219	0.513185	0.495085	1.74165	2.12232	2.48529	2.71763	1.98349	1.39101	5	6	4.516	0.00129		kinesin family member 23	Homo sapiens kinesin family member 23 (KIF23), transcript variant 1, mRNA [NM_138555]	GTGGTGGACAATCTGTTCAGTTTACTGATATTGAGACTTTAAAGCAAGAATCACCAAATG
A_24_P55295	NM_000165	GJA1	Hs.74471	2697	hs|6q22.31	GO:0000139(Golgi membrane)|GO:0002544(chronic inflammatory response)|GO:0003104(positive regulation of glomerular filtration)|GO:0003158(endothelium development)|GO:0004871(signal transducer activity)|GO:0005243(gap junction channel activity)|GO:0005515(protein binding)|GO:0005741(mitochondrial outer membrane)|GO:0005764(lysosome)|GO:0005769(early endosome)|GO:0005771(multivesicular body)|GO:0005…	4.05982	6.01147	4.50389	6.88021	6.46691	4.67186	18.8672	28.2896	23.5593	23.1884	25.7867	25.4041	6	6	4.505	3.22e-07		gap junction protein, alpha 1, 43kDa	Homo sapiens gap junction protein, alpha 1, 43kDa (GJA1), mRNA [NM_000165]	AGTACTGTAAACAGGCTTTAGTCATTAATGTGAGAGACTTAGAAAAAATGCTTAGAGTGG
A_23_P124417	NM_004336	BUB1	Hs.469649	699	hs|2q13	GO:0000278(mitotic cell cycle)|GO:0000776(kinetochore)|GO:0000777(condensed chromosome kinetochore)|GO:0000780(condensed nuclear chromosome, centromeric region)|GO:0004672(protein kinase activity)|GO:0004674(protein serine/threonine kinase activity)|GO:0005515(protein binding)|GO:0005524(ATP binding)|GO:0005634(nucleus)|GO:0005730(nucleolus)|GO:0005737(cytoplasm)|GO:0005829(cytosol)|GO:0006468(pr…	1.61286	1.79506	1.83346	1.83898	2.05131	1.78022	7.14598	7.97221	7.32141	9.77181	8.23782	8.64677	6	6	4.485	1.13e-09		BUB1 mitotic checkpoint serine/threonine kinase	Homo sapiens BUB1 mitotic checkpoint serine/threonine kinase (BUB1), transcript variant 1, mRNA [NM_004336]	AGCCTGAAGGTCTTTTTAGAAGGCTTCCTCATTTGGATATGTGGAATGAATTTTTTCATG
A_23_P98350	NM_001165	BIRC3	Hs.127799	330	hs|11q22.2	GO:0002224(toll-like receptor signaling pathway)|GO:0002756(MyD88-independent toll-like receptor signaling pathway)|GO:0004842(ubiquitin-protein ligase activity)|GO:0005515(protein binding)|GO:0005634(nucleus)|GO:0005730(nucleolus)|GO:0005737(cytoplasm)|GO:0005829(cytosol)|GO:0006915(apoptotic process)|GO:0007166(cell surface receptor signaling pathway)|GO:0007283(spermatogenesis)|GO:0008270(zinc…	0.189914	0.0838746	0.0852655	0.0478762	0.0326567	0.0724198	0.244962	0.405604	0.256573	0.405047	0.329592	0.358851	1	6	4.467	0.000985		baculoviral IAP repeat containing 3	Homo sapiens baculoviral IAP repeat containing 3 (BIRC3), transcript variant 1, mRNA [NM_001165]	TCCTATACATCGAAGGTGTGCATATATGTTGAATGACATTTTAGGGACATGGTGTTTTTA
A_32_P205110	NM_001453	FOXC1	Hs.348883	2296	hs|6p25.3	GO:0000122(negative regulation of transcription from RNA polymerase II promoter)|GO:0000977(RNA polymerase II regulatory region sequence-specific DNA binding)|GO:0001501(skeletal system development)|GO:0001503(ossification)|GO:0001541(ovarian follicle development)|GO:0001654(eye development)|GO:0001657(ureteric bud development)|GO:0001701(in utero embryonic development)|GO:0001756(somitogenesis)|…	1.16818	1.01839	1.06621	1.02938	0.877961	0.889216	4.33732	4.80638	4.19693	4.72194	4.0565	4.76291	6	6	4.456	8.4e-10		forkhead box C1	Homo sapiens forkhead box C1 (FOXC1), mRNA [NM_001453]	CTCCCCCTTTTGTAAATAACCCAGGAAATGTAATAAATTCATTATCTTAGGGTGATCTGC
A_23_P11685	NM_024420	PLA2G4A	Hs.497200	5321	hs|1q31.1	GO:0004622(lysophospholipase activity)|GO:0004623(phospholipase A2 activity)|GO:0005509(calcium ion binding)|GO:0005544(calcium-dependent phospholipid binding)|GO:0005737(cytoplasm)|GO:0005743(mitochondrial inner membrane)|GO:0005789(endoplasmic reticulum membrane)|GO:0005794(Golgi apparatus)|GO:0005829(cytosol)|GO:0006644(phospholipid metabolic process)|GO:0006654(phosphatidic acid biosynthetic …	4.82798	6.44266	7.10809	6.32245	6.11925	6.18856	25.0369	26.7356	29.0764	29.8505	26.5038	25.4265	6	6	4.414	1.06e-08		phospholipase A2, group IVA (cytosolic, calcium-dependent)	Homo sapiens phospholipase A2, group IVA (cytosolic, calcium-dependent) (PLA2G4A), mRNA [NM_024420]	GAAATGGCAGCAGTTTCTGATGCTGAGGCAGTTTGCAATCCCATGACAACTGGATTTAAA
A_24_P373844	NM_024076	KCTD15	Hs.221873	79047	hs|19q13.11	GO:0007275(multicellular organismal development)|GO:0051260(protein homooligomerization)	1.63176	1.7991	1.15746	0.857169	1.4593	1.86658	6.43341	6.17818	5.60739	7.19967	5.65444	6.44928	6	6	4.412	2.56e-05		potassium channel tetramerization domain containing 15	Homo sapiens potassium channel tetramerization domain containing 15 (KCTD15), transcript variant 1, mRNA [NM_024076]	AAGCATTTTTACACTTCCTGGAATGAGTATATTATCAGCAATCTTTTGTCAAATGCCAGC
A_23_P306655	NM_198722	AMIGO3	Hs.567903	386724	hs|3p21.31	GO:0007157(heterophilic cell-cell adhesion)|GO:0016021(integral to membrane)	1.10332	0.652616	0.836707	0.760319	0.715404	0.808756	3.73902	2.53671	4.51622	3.30341	3.74518	3.6808	6	6	4.41	7.85e-08		adhesion molecule with Ig-like domain 3	Homo sapiens adhesion molecule with Ig-like domain 3 (AMIGO3), mRNA [NM_198722]	ACACAGTGAAGGGGATCATGGCCTGCACCCCTGCTTTTCAGCAGTAAAAAGCCCGAAAAG
A_24_P191312	NM_003038	SLC1A4	Hs.654352	6509	hs|2p14	GO:0005254(chloride channel activity)|GO:0005813(centrosome)|GO:0005815(microtubule organizing center)|GO:0005882(intermediate filament)|GO:0005886(plasma membrane)|GO:0005887(integral to plasma membrane)|GO:0006811(ion transport)|GO:0006821(chloride transport)|GO:0006835(dicarboxylic acid transport)|GO:0006865(amino acid transport)|GO:0006868(glutamine transport)|GO:0015180(L-alanine transmembra…	0.174446	0.203455	0.120332	0.180316	0.116914	0.096617	0.564176	0.734045	0.729407	0.739262	0.469262	0.607037	4	6	4.406	4.61e-06		solute carrier family 1 (glutamate/neutral amino acid transporter), member 4	Homo sapiens solute carrier family 1 (glutamate/neutral amino acid transporter), member 4 (SLC1A4), transcript variant 1, mRNA [NM_003038]	ACGCTTATGGATGTGTGTACCATTGAGATGAGAATGGGTAGATGGAACGGAGACCATCAA
A_23_P205074	NM_181785	SLC46A3	Hs.117167	283537	hs|13q12.3	GO:0003674(molecular_function)|GO:0008150(biological_process)|GO:0016021(integral to membrane)|GO:0055085(transmembrane transport)|GO:0070062(extracellular vesicular exosome)	0.152785	0.224817	0.187301	0.185037	0.190047	0.102391	0.671919	0.721383	0.709396	0.691793	0.663713	1.02874	4	6	4.375	2.74e-06		solute carrier family 46, member 3	Homo sapiens solute carrier family 46, member 3 (SLC46A3), transcript variant 1, mRNA [NM_181785]	AGTCACTGCAGTTTCTACTTTTAATGGAATTTACTCAGCCACTGTTGCTTGGTACCCTGG
A_23_P401055	NM_003106	SOX2	Hs.518438	6657	hs|3q26.33	GO:0000122(negative regulation of transcription from RNA polymerase II promoter)|GO:0000976(transcription regulatory region sequence-specific DNA binding)|GO:0001077(RNA polymerase II core promoter proximal region sequence-specific DNA binding transcription factor activity involved in positive regulation of transcription)|GO:0001649(osteoblast differentiation)|GO:0001654(eye development)|GO:00017…	0.0604749	0.139422	0.101197	0.0378276	0.112117	0.143353	0.290761	0.318507	0.404917	0.46769	0.440892	0.466271	2	6	4.368	0.000501		SRY (sex determining region Y)-box 2	Homo sapiens SRY (sex determining region Y)-box 2 (SOX2), mRNA [NM_003106]	TGGCCATGCAGGTTGACACCGTTGGTAATTTATAATAGCTTTTGTTCGATCCCAACTTTC
A_23_P74349	NM_145697	NUF2	Hs.651950	83540	hs|1q23.3	GO:0000278(mitotic cell cycle)|GO:0000775(chromosome, centromeric region)|GO:0000777(condensed chromosome kinetochore)|GO:0003674(molecular_function)|GO:0005515(protein binding)|GO:0005634(nucleus)|GO:0005829(cytosol)|GO:0007059(chromosome segregation)|GO:0007067(mitosis)|GO:0031262(Ndc80 complex)	1.32384	1.63792	1.98713	1.58855	1.94665	1.79671	7.51275	7.971	7.37659	8.15867	6.82894	6.72068	6	6	4.364	5.56e-08		NUF2, NDC80 kinetochore complex component	Homo sapiens NUF2, NDC80 kinetochore complex component (NUF2), transcript variant 1, mRNA [NM_145697]	AAACTGCTTTGGAGAAATACCACGACGGTATTGAAAAGGCAGCAGAGGACTCCTATGCTA
A_23_P420196	NM_003745	SOCS1	Hs.50640	8651	hs|16p13.13	GO:0001932(regulation of protein phosphorylation)|GO:0004860(protein kinase inhibitor activity)|GO:0005159(insulin-like growth factor receptor binding)|GO:0005515(protein binding)|GO:0005634(nucleus)|GO:0005737(cytoplasm)|GO:0005829(cytosol)|GO:0006469(negative regulation of protein kinase activity)|GO:0007259(JAK-STAT cascade)|GO:0016023(cytoplasmic membrane-bounded vesicle)|GO:0016567(protein u…	1.25465	0.913289	0.98378	0.62863	0.826269	0.76719	4.2142	3.52456	4.11	3.21216	3.91043	4.01134	6	6	4.358	2.5e-06		suppressor of cytokine signaling 1	Homo sapiens suppressor of cytokine signaling 1 (SOCS1), mRNA [NM_003745]	ACCTGAACTCGCACCTCCTACCTCTTCATGTTTACATATACCCAGTATCTTTGCACAAAC
A_23_P58328	NM_007193	ANXA10	Hs.188401	11199	hs|4q32.3	GO:0005509(calcium ion binding)|GO:0005544(calcium-dependent phospholipid binding)|GO:0005739(mitochondrion)	0.0810839	0.15152	0.17275	0.141469	0.0815231	0.160595	0.440895	0.558378	0.549228	0.855706	0.452207	0.5143	4	6	4.357	1.28e-05		annexin A10	Homo sapiens annexin A10 (ANXA10), mRNA [NM_007193]	TGGTGATGCTGAGGACTACTAAAATGAAGAGGACTTGGAGTACTGTGCACTCCTCTTTCT
A_19_P00322910	NM_057179	TWIST2	Hs.422585	117581	hs|2q37.3	GO:0000122(negative regulation of transcription from RNA polymerase II promoter)|GO:0001076(RNA polymerase II transcription factor binding transcription factor activity)|GO:0001649(osteoblast differentiation)|GO:0003677(DNA binding)|GO:0003682(chromatin binding)|GO:0003700(sequence-specific DNA binding transcription factor activity)|GO:0005515(protein binding)|GO:0005634(nucleus)|GO:0005667(trans…	0.102798	0.0976295	0.0816949	0.045258	0.0328208	0.079109	0.228622	0.280853	0.475994	0.316841	0.293684	0.230159	0	5	4.352	0.000136		twist family bHLH transcription factor 2	Homo sapiens twist family bHLH transcription factor 2 (TWIST2), transcript variant 2, mRNA [NM_057179]	AACCTTCACCAAGGTCTTGGAACATGAAGCAGAGACTCTGGTGCTGACTCTATCATTTGA
A_24_P237613	NM_182488	USP12	Hs.42400	219333	hs|13q12.13	GO:0004197(cysteine-type endopeptidase activity)|GO:0004221(ubiquitin thiolesterase activity)|GO:0004843(ubiquitin-specific protease activity)|GO:0005515(protein binding)|GO:0005575(cellular_component)|GO:0006511(ubiquitin-dependent protein catabolic process)|GO:0016579(protein deubiquitination)	0.144443	0.398464	0.435765	0.28996	0.26779	0.438261	1.53207	1.21023	1.2338	1.33023	1.5625	1.21282	5	6	4.348	0.000228		ubiquitin specific peptidase 12	Homo sapiens ubiquitin specific peptidase 12 (USP12), mRNA [NM_182488]	GGGTGCAGTAGAAAGAATCGGAATCTGTGCCGTATTGATAAGGAGATGATGTTGAACACA
A_33_P3263217	NM_022143	LRRC4	Hs.655003	64101	hs|7q32.1	GO:0005515(protein binding)|GO:0016021(integral to membrane)|GO:0030054(cell junction)|GO:0045211(postsynaptic membrane)	0.189741	0.113075	0.129977	0.135542	0.0819448	0.173442	0.615535	0.401738	0.675958	0.645231	0.591678	0.547111	5	6	4.32	5.97e-06		leucine rich repeat containing 4	Homo sapiens leucine rich repeat containing 4 (LRRC4), mRNA [NM_022143]	GGAGGGGAATTGCCAACAAAAGAACACTGATTGTAATGTGAGAAAAGTGTATTTTTGTAT
A_24_P12401	NM_001025366	VEGFA	Hs.73793	7422	hs|6p21.1	GO:0000122(negative regulation of transcription from RNA polymerase II promoter)|GO:0001525(angiogenesis)|GO:0001541(ovarian follicle development)|GO:0001569(patterning of blood vessels)|GO:0001570(vasculogenesis)|GO:0001666(response to hypoxia)|GO:0001701(in utero embryonic development)|GO:0001822(kidney development)|GO:0001934(positive regulation of protein phosphorylation)|GO:0001938(positive …	0.0854154	0.108239	0.135297	0.121209	0.0944024	0.135622	0.411713	0.528964	0.365788	0.696433	0.40294	0.564276	3	6	4.32	7.3e-07		vascular endothelial growth factor A	Homo sapiens vascular endothelial growth factor A (VEGFA), transcript variant 1, mRNA [NM_001025366]	AGTGTTTTATATACGGTACTTATTTAATATCCCTTTTTAATTAGAAATTAAAACAGTTAA
A_23_P84189	NM_181671	PITPNC1	Hs.591185	26207	hs|17q24.2	GO:0005515(protein binding)|GO:0005737(cytoplasm)|GO:0007165(signal transduction)|GO:0008289(lipid binding)|GO:0008526(phosphatidylinositol transporter activity)|GO:0015914(phospholipid transport)	0.131346	0.123266	0.128974	0.170752	0.127913	0.132484	0.617089	0.500408	0.598701	0.627028	0.617119	0.539826	5	6	4.308	9.33e-10		phosphatidylinositol transfer protein, cytoplasmic 1	Homo sapiens phosphatidylinositol transfer protein, cytoplasmic 1 (PITPNC1), transcript variant 2, mRNA [NM_181671]	TGTAACCACATAGCCGTATGCCAGAGAGGAAGCCTTGTTATTGGGCATTTGATGAGGTTT
A_23_P34788	NM_006845	KIF2C	Hs.720061	11004	hs|1p34.1	GO:0000278(mitotic cell cycle)|GO:0000775(chromosome, centromeric region)|GO:0000776(kinetochore)|GO:0000777(condensed chromosome kinetochore)|GO:0003777(microtubule motor activity)|GO:0005515(protein binding)|GO:0005524(ATP binding)|GO:0005634(nucleus)|GO:0005829(cytosol)|GO:0005871(kinesin complex)|GO:0005881(cytoplasmic microtubule)|GO:0007018(microtubule-based movement)|GO:0007019(microtubule…	4.01257	3.00872	3.19236	2.65645	3.26586	3.2523	11.1162	12.0168	14.8551	15.3536	13.9689	16.312	6	6	4.307	7.51e-09		kinesin family member 2C	Homo sapiens kinesin family member 2C (KIF2C), mRNA [NM_006845]	AGAGGAAGGAGCTCTTAGTTACCCTTTTGTGTTGCCCTTCTTTCCATCAAGGGGAATGTT
A_33_P3320538	ENST00000463407	NUPL1		9818	hs|13q12.13	GO:0000278(mitotic cell cycle)|GO:0005487(nucleocytoplasmic transporter activity)|GO:0005515(protein binding)|GO:0005635(nuclear envelope)|GO:0005643(nuclear pore)|GO:0005975(carbohydrate metabolic process)|GO:0006913(nucleocytoplasmic transport)|GO:0007077(mitotic nuclear envelope disassembly)|GO:0008645(hexose transport)|GO:0010827(regulation of glucose transport)|GO:0015031(protein transport)|…	0.269271	0.262331	0.244388	0.297205	0.282141	0.158518	0.861643	1.31789	0.930208	0.902259	1.21695	1.21647	6	6	4.28	3.9e-07		nucleoporin like 1	nucleoporin like 1 [Source:HGNC Symbol;Acc:20261] [ENST00000463407]	GGTGTAATGTAGCAGAGCTTAAGAATAGAACTCAATTATCACTTTTTGTGAACAAGTTGG
A_24_P112447	NM_020354	ENTPD7	Hs.744948	57089	hs|10q24.2	GO:0008152(metabolic process)|GO:0016021(integral to membrane)|GO:0016787(hydrolase activity)|GO:0030659(cytoplasmic vesicle membrane)|GO:0046872(metal ion binding)	0.322712	0.242618	0.311641	0.297158	0.319705	0.236353	1.28093	1.26434	1.12345	1.28264	1.16268	1.20934	6	6	4.261	1.56e-07		ectonucleoside triphosphate diphosphohydrolase 7	Homo sapiens ectonucleoside triphosphate diphosphohydrolase 7 (ENTPD7), mRNA [NM_020354]	CCTGTCGTAGTGTTGATGATGTTAGTACATGATTTTAAAGGTTAGAACCCCTTCTAAATG
A_33_P3215239	NM_001284259	KIF20B	Hs.240	9585	hs|10q23.31	GO:0000087(M phase of mitotic cell cycle)|GO:0003777(microtubule motor activity)|GO:0005524(ATP binding)|GO:0005634(nucleus)|GO:0005654(nucleoplasm)|GO:0005730(nucleolus)|GO:0005737(cytoplasm)|GO:0005813(centrosome)|GO:0005819(spindle)|GO:0005874(microtubule)|GO:0006200(ATP catabolic process)|GO:0007018(microtubule-based movement)|GO:0007050(cell cycle arrest)|GO:0007067(mitosis)|GO:0007088(regul…	0.105403	0.252366	0.272467	0.384801	0.245741	0.202814	1.02169	1.33832	1.01124	1.0413	0.82868	0.693267	5	6	4.257	0.000115		kinesin family member 20B	Homo sapiens kinesin family member 20B (KIF20B), transcript variant 1, mRNA [NM_001284259]	TACCACACCAGTGACAGTTAAGATTCCCAAGGCTCGGAAGAGGAAGAGTAATGAAATGGA
A_23_P58321	NM_001237	CCNA2	Hs.58974	890	hs|4q27	GO:0000079(regulation of cyclin-dependent protein kinase activity)|GO:0000086(G2/M transition of mitotic cell cycle)|GO:0000278(mitotic cell cycle)|GO:0001939(female pronucleus)|GO:0001940(male pronucleus)|GO:0005515(protein binding)|GO:0005634(nucleus)|GO:0005654(nucleoplasm)|GO:0005737(cytoplasm)|GO:0007067(mitosis)|GO:0007095(mitotic cell cycle G2/M transition DNA damage checkpoint)|GO:0007265…	0.858486	2.0356	2.12132	2.12015	1.90686	1.51632	7.09217	7.66406	7.16443	7.54324	7.27807	6.27328	6	6	4.251	0.000118		cyclin A2	Homo sapiens cyclin A2 (CCNA2), mRNA [NM_001237]	AAGTTTGATAGATGCTGACCCATACCTCAAGTATTTGCCATCAGTTATTGCTGGAGCTGC
A_24_P371628	NM_054027	ANKH	Hs.156727	56172	hs|5p15.2	GO:0001501(skeletal system development)|GO:0005315(inorganic phosphate transmembrane transporter activity)|GO:0005886(plasma membrane)|GO:0005887(integral to plasma membrane)|GO:0007626(locomotory behavior)|GO:0015114(phosphate ion transmembrane transporter activity)|GO:0016021(integral to membrane)|GO:0019867(outer membrane)|GO:0030500(regulation of bone mineralization)|GO:0030504(inorganic diph…	0.344415	0.410216	0.275592	0.357456	0.3803	0.388669	1.29433	1.46056	1.51205	1.91184	1.33954	1.61772	6	6	4.233	6.9e-09		ANKH inorganic pyrophosphate transport regulator	Homo sapiens ANKH inorganic pyrophosphate transport regulator (ANKH), mRNA [NM_054027]	TTATTGGCAGCAGTTTTATAAAGTCCGTCATTTGCATTTGAATGTAAGGCTCAGTAAATG
A_24_P296254	NM_014783	ARHGAP11A	Hs.591130	9824	hs|15q13.3	GO:0005096(GTPase activator activity)|GO:0005829(cytosol)|GO:0007264(small GTPase mediated signal transduction)|GO:0043547(positive regulation of GTPase activity)|GO:0051056(regulation of small GTPase mediated signal transduction)	0.0781232	0.102026	0.0416702	0.176276	0.112461	0.148086	0.37899	0.451909	0.446731	0.459524	0.407739	0.389789	2	6	4.23	0.000857		Rho GTPase activating protein 11A	Homo sapiens Rho GTPase activating protein 11A (ARHGAP11A), transcript variant 1, mRNA [NM_014783]	CTCTCTGGAAAATGACTTGACTAAGGCTCTCATGAAATTCAAAGTGCCATTTAGAACATG
A_23_P386478	NM_024873	TNIP3	Hs.208206	79931	hs|4q27	GO:0002756(MyD88-independent toll-like receptor signaling pathway)|GO:0006954(inflammatory response)|GO:0031593(polyubiquitin binding)|GO:0034142(toll-like receptor 4 signaling pathway)|GO:0043124(negative regulation of I-kappaB kinase/NF-kappaB cascade)|GO:0071222(cellular response to lipopolysaccharide)	0.126911	0.0263466	0.042664	0.0837865	0.0498204	0.120631	0.299306	0.315837	0.289119	0.296165	0.26051	0.193959	2	5	4.226	0.0018		TNFAIP3 interacting protein 3	Homo sapiens TNFAIP3 interacting protein 3 (TNIP3), transcript variant 1, mRNA [NM_024873]	AATACAGGAAAAGGCTTCTGACAGCTAAGATCCTGATCAAATTGGAGGAGCCAGTTATTA
A_24_P133253	NM_000899	KITLG	Hs.1048	4254	hs|12q21.32	GO:0001755(neural crest cell migration)|GO:0002763(positive regulation of myeloid leukocyte differentiation)|GO:0005125(cytokine activity)|GO:0005173(stem cell factor receptor binding)|GO:0005515(protein binding)|GO:0005576(extracellular region)|GO:0005615(extracellular space)|GO:0005737(cytoplasm)|GO:0005856(cytoskeleton)|GO:0005886(plasma membrane)|GO:0007155(cell adhesion)|GO:0007165(signal tr…	2.88784	3.25582	3.57446	3.59745	3.03263	3.09685	13.4606	15.6028	12.0217	12.9311	14.2348	13.7833	6	6	4.219	7.82e-11		KIT ligand	Homo sapiens KIT ligand (KITLG), transcript variant b, mRNA [NM_000899]	GTGATGTGTATGTGTATATACTGTATGTGTACTTTTTAAAATAGGTGTATGTCCCAACCC
A_23_P63789	NM_032997	ZWINT	Hs.591363	11130	hs|10q21.1	GO:0000070(mitotic sister chromatid segregation)|GO:0000278(mitotic cell cycle)|GO:0000776(kinetochore)|GO:0000777(condensed chromosome kinetochore)|GO:0005515(protein binding)|GO:0005634(nucleus)|GO:0005737(cytoplasm)|GO:0005829(cytosol)|GO:0007049(cell cycle)|GO:0007051(spindle organization)|GO:0007093(mitotic cell cycle checkpoint)|GO:0030425(dendrite)|GO:0047485(protein N-terminus binding)|GO…	6.49434	5.94321	5.46363	5.72946	5.42101	5.19915	21.1443	24.8118	25.561	26.3442	20.6381	26.2844	6	6	4.217	7.83e-10		ZW10 interacting kinetochore protein	Homo sapiens ZW10 interacting kinetochore protein (ZWINT), transcript variant 2, mRNA [NM_032997]	TCAAAGATTCAGAGATTGGCTTTTGTCATCCACTATTGTATGTTTTGTTTCATTGACCTC
A_24_P365025	NM_003971	SPAG9	Hs.463439	9043	hs|17q21.33	GO:0001669(acrosomal vesicle)|GO:0005515(protein binding)|GO:0005737(cytoplasm)|GO:0005829(cytosol)|GO:0007257(activation of JUN kinase activity)|GO:0007283(spermatogenesis)|GO:0008432(JUN kinase binding)|GO:0016021(integral to membrane)|GO:0019894(kinesin binding)|GO:0030335(positive regulation of cell migration)|GO:0042147(retrograde transport, endosome to Golgi)|GO:0042692(muscle cell differen…	4.24352	2.86076	2.99184	2.55562	2.81229	2.72917	11.6956	14.1452	11.5786	13.0247	10.8471	14.7136	6	6	4.213	7.45e-08		sperm associated antigen 9	Homo sapiens sperm associated antigen 9 (SPAG9), transcript variant 3, mRNA [NM_003971]	TGTCCCGAGAGGGTTAAAAGCTAACTGTAAATTACTTTAACTTTCACTTTCAAATCTGAC
A_23_P256244	ENST00000497705	OXR1	Hs.701892	55074	hs|8q23.1	GO:0003674(molecular_function)|GO:0005575(cellular_component)|GO:0005730(nucleolus)|GO:0005739(mitochondrion)|GO:0006979(response to oxidative stress)|GO:0007628(adult walking behavior)|GO:0016491(oxidoreductase activity)|GO:0043524(negative regulation of neuron apoptotic process)|GO:0055114(oxidation-reduction process)|GO:0071447(cellular response to hydroperoxide)	0.0280946	0.0618111	0.0299243	0.0335635	0.0568919	0.0708736	0.184298	0.262086	0.11538	0.153619	0.227557	0.200604	0	4	4.209	6e-05		oxidation resistance 1	oxidation resistance 1 [Source:HGNC Symbol;Acc:15822] [ENST00000497705]	CAGTGTCTACTGTCTTTTCTTATCCCACAGGTGGATTGTACACATAATGAGCATCATTGC
A_23_P416305	NM_000990	RPL27A	Hs.523463	6157	hs|11p15.4	GO:0000184(nuclear-transcribed mRNA catabolic process, nonsense-mediated decay)|GO:0003723(RNA binding)|GO:0003735(structural constituent of ribosome)|GO:0005515(protein binding)|GO:0005829(cytosol)|GO:0006412(translation)|GO:0006413(translational initiation)|GO:0006414(translational elongation)|GO:0006415(translational termination)|GO:0006614(SRP-dependent cotranslational protein targeting to me…	0.988212	0.489592	0.48219	0.564773	0.643885	0.768633	2.12668	3.18534	2.36647	3.10274	2.53558	2.84714	6	6	4.202	4.55e-06		ribosomal protein L27a	Homo sapiens ribosomal protein L27a (RPL27A), mRNA [NM_000990]	TGCTGAAAAGTAATATTTTCTCTTTCGAGAGTTTTCATGGCCTTTTAAATTACACCCCCA
A_24_P129341	NM_020299	AKR1B10	Hs.116724	57016	hs|7q33	GO:0001523(retinoid metabolic process)|GO:0001758(retinal dehydrogenase activity)|GO:0004033(aldo-keto reductase (NADP) activity)|GO:0005515(protein binding)|GO:0005764(lysosome)|GO:0005829(cytosol)|GO:0006081(cellular aldehyde metabolic process)|GO:0007586(digestion)|GO:0007603(phototransduction, visible light)|GO:0008202(steroid metabolic process)|GO:0016488(farnesol catabolic process)|GO:00445…	0.214406	0.261199	0.20649	0.217029	0.211726	0.202205	0.79393	0.994017	0.968559	1.02378	0.912525	0.821406	6	6	4.196	2.82e-10		aldo-keto reductase family 1, member B10 (aldose reductase)	Homo sapiens aldo-keto reductase family 1, member B10 (aldose reductase) (AKR1B10), mRNA [NM_020299]	ATCCTCTCATTTGGAAGACTATCCCTTCGATGCAGAATATTGAGGTTGAATCTCCTGGTG
A_23_P132121	NM_173354	SIK1	Hs.282113	150094	hs|21q22.3	GO:0000122(negative regulation of transcription from RNA polymerase II promoter)|GO:0000287(magnesium ion binding)|GO:0002028(regulation of sodium ion transport)|GO:0004674(protein serine/threonine kinase activity)|GO:0005515(protein binding)|GO:0005524(ATP binding)|GO:0005634(nucleus)|GO:0005737(cytoplasm)|GO:0005829(cytosol)|GO:0006468(protein phosphorylation)|GO:0007049(cell cycle)|GO:0007346(…	1.41426	0.718183	0.68647	0.744672	0.542572	0.566788	2.6645	3.05663	3.0423	3.44979	3.28317	3.06918	6	6	4.188	9.07e-05		salt-inducible kinase 1	Homo sapiens salt-inducible kinase 1 (SIK1), mRNA [NM_173354]	CCAACACAAAACTCCTTCCCCTTTTTAAAATGATTTCTGTTCTAATGCCATAGATCAAAG
A_33_P3316539	NM_001008539	SLC7A2	Hs.448520	6542	hs|8p22	GO:0000064(L-ornithine transmembrane transporter activity)|GO:0002537(nitric oxide production involved in inflammatory response)|GO:0005289(high affinity arginine transmembrane transporter activity)|GO:0005886(plasma membrane)|GO:0005887(integral to plasma membrane)|GO:0006520(cellular amino acid metabolic process)|GO:0006809(nitric oxide biosynthetic process)|GO:0006810(transport)|GO:0006811(ion…	2.7036	1.33796	1.78248	1.39887	1.74911	1.82369	6.21877	7.49405	7.63354	7.83108	6.2816	8.69456	6	6	4.174	2.74e-06		solute carrier family 7 (cationic amino acid transporter, y+ system), member 2	Homo sapiens solute carrier family 7 (cationic amino acid transporter, y+ system), member 2 (SLC7A2), transcript variant 2, mRNA [NM_001008539]	ATTCTATGTCTGTAAAAACCAACAAAGGCATTGGACTTGTGTGAATGTACAGGGTTTTTT
A_24_P80776	NM_001135575	SMIM13	Hs.656600	221710	hs|6p24.2	GO:0016021(integral to membrane)	0.0313142	0.417941	0.230098	0.769687	0.211107	0.242525	0.918639	1.37665	1.03363	0.722029	0.906565	0.730475	5	6	4.171	0.0217		small integral membrane protein 13	Homo sapiens small integral membrane protein 13 (SMIM13), mRNA [NM_001135575]	ATTCACTTGATGGATTTTGTAGTGATGTTTTCACAGTTGAAACAAACATATTGCTGTGCG
A_33_P3307957	NM_001122674	ABCD3	Hs.700576	5825	hs|1p21.3	GO:0005515(protein binding)|GO:0005524(ATP binding)|GO:0005743(mitochondrial inner membrane)|GO:0005777(peroxisome)|GO:0005778(peroxisomal membrane)|GO:0005782(peroxisomal matrix)|GO:0005829(cytosol)|GO:0006200(ATP catabolic process)|GO:0006635(fatty acid beta-oxidation)|GO:0007031(peroxisome organization)|GO:0016021(integral to membrane)|GO:0016887(ATPase activity)|GO:0042626(ATPase activity, co…	0.14621	0.0837877	0.108834	0.226896	0.230762	0.232161	0.449977	0.646995	0.478221	0.89217	0.86075	0.797523	3	6	4.17	0.000114		ATP-binding cassette, sub-family D (ALD), member 3	Homo sapiens ATP-binding cassette, sub-family D (ALD), member 3 (ABCD3), transcript variant 2, mRNA [NM_001122674]	CCAGCTGCTTACACAAGATGTAGAAAAATTTTGTAACAGTGTAGTCGATCTGTATTCAAA
A_23_P133739	NM_148959	HUS1B	Hs.669039	135458	hs|6p25.3	GO:0000077(DNA damage checkpoint)|GO:0005730(nucleolus)|GO:0006281(DNA repair)|GO:0030896(checkpoint clamp complex)	0.0584935	0.0531828	0.0504049	0.060798	0.0602739	0.0334636	0.128125	0.186001	0.286759	0.282431	0.261834	0.200084	0	4	4.17	7.53e-06		HUS1 checkpoint homolog b (S. pombe)	Homo sapiens HUS1 checkpoint homolog b (S. pombe) (HUS1B), mRNA [NM_148959]	GTGCAATATTTGGGACAATACTCTTCTTCAGCTTGTTTTGGTTCAAGAATATGTCTCTCT
A_23_P50108	NM_006101	NDC80	Hs.414407	10403	hs|18p11.32	GO:0000070(mitotic sister chromatid segregation)|GO:0000132(establishment of mitotic spindle orientation)|GO:0000278(mitotic cell cycle)|GO:0000775(chromosome, centromeric region)|GO:0000776(kinetochore)|GO:0000777(condensed chromosome kinetochore)|GO:0000942(condensed nuclear chromosome outer kinetochore)|GO:0005515(protein binding)|GO:0005634(nucleus)|GO:0005829(cytosol)|GO:0007049(cell cycle)|…	2.55698	2.53772	2.71736	2.28474	2.46939	2.42472	9.58869	10.1503	10.3329	12.535	9.04848	10.7146	6	6	4.144	7.54e-09		NDC80 kinetochore complex component	Homo sapiens NDC80 kinetochore complex component (NDC80), mRNA [NM_006101]	AAAGTGGGAAATAACTTGCAACGTCTGTTAGAGATGGTTGCTACACATGTTGGGTCTGTA
A_21_P0000624	NM_001243392	SLC6A13	Hs.504398	6540	hs|12p13.33	GO:0005328(neurotransmitter:sodium symporter activity)|GO:0005332(gamma-aminobutyric acid:sodium symporter activity)|GO:0005886(plasma membrane)|GO:0005887(integral to plasma membrane)|GO:0007268(synaptic transmission)|GO:0007269(neurotransmitter secretion)|GO:0015812(gamma-aminobutyric acid transport)|GO:0055085(transmembrane transport)|GO:0070062(extracellular vesicular exosome)	0.119231	0.0455213	0.0775114	0.0167771	0.0733975	0.0577138	0.271728	0.240456	0.220946	0.246405	0.225681	0.187171	0	5	4.139	0.0031		solute carrier family 6 (neurotransmitter transporter), member 13	Homo sapiens solute carrier family 6 (neurotransmitter transporter), member 13 (SLC6A13), transcript variant 3, mRNA [NM_001243392]	GATAACCAAACTGTTCTGTGGTCTTAAGTAATAAATAGTAGCTCTGCTGATGATGACGTT
A_23_P325040	NM_003276	TMPO	Hs.11355	7112	hs|12q23.1	GO:0000785(chromatin)|GO:0003677(DNA binding)|GO:0005515(protein binding)|GO:0005521(lamin binding)|GO:0005634(nucleus)|GO:0005635(nuclear envelope)|GO:0005637(nuclear inner membrane)|GO:0006355(regulation of transcription, DNA-dependent)|GO:0016021(integral to membrane)|GO:0031965(nuclear membrane)	0.052072	0.307197	0.283523	0.728714	0.275129	0.260374	0.622325	1.35684	1.22666	1.42566	0.966545	0.833759	5	6	4.139	0.008		thymopoietin	Homo sapiens thymopoietin (TMPO), transcript variant 1, mRNA [NM_003276]	AAAGTAATTGCCTGTGTAGAACTACTTGTCTTTTCTAAAGATTTGCGTAGATAGGAAGCC
A_23_P86532	ENST00000263103	BICC1	Hs.158745	80114	hs|10q21.1	GO:0005737(cytoplasm)|GO:0007275(multicellular organismal development)|GO:0090090(negative regulation of canonical Wnt receptor signaling pathway)	0.0339356	0.105249	0.0925565	0.083475	0.0812452	0.0833624	0.31526	0.313992	0.201951	0.411933	0.327545	0.343643	0	6	4.13	7.2e-05		BicC family RNA binding protein 1	bicaudal C homolog 1 (Drosophila) [Source:HGNC Symbol;Acc:19351] [ENST00000263103]	TCCCCAGATTAGAATGTGTTTATTTGGGTTGGAGTATCACTGACTGTGGCCTCTCTGACT
A_23_P20494	NM_006096	NDRG1	Hs.372914	10397	hs|8q24.22	GO:0005515(protein binding)|GO:0005634(nucleus)|GO:0005737(cytoplasm)|GO:0005813(centrosome)|GO:0005829(cytosol)|GO:0005874(microtubule)|GO:0005886(plasma membrane)|GO:0005913(cell-cell adherens junction)|GO:0008017(microtubule binding)|GO:0008219(cell death)|GO:0010038(response to metal ion)|GO:0015630(microtubule cytoskeleton)|GO:0017137(Rab GTPase binding)|GO:0030330(DNA damage response, signa…	12.3215	10.2107	9.8619	9.03412	10.5931	10.9959	37.0661	41.6513	45.5242	48.7324	41.4094	45.5667	6	6	4.128	3.46e-10		N-myc downstream regulated 1	Homo sapiens N-myc downstream regulated 1 (NDRG1), transcript variant 2, mRNA [NM_006096]	TGCCAGGTTCCTGTACTACTGCCTTGTACTTTTCATTTTGGCTCACCGTGGATTTTCTCA
A_24_P371281	NM_025246	SLC35G2	Hs.477692	80723	hs|3q22.3	GO:0005794(Golgi apparatus)|GO:0016021(integral to membrane)	0.131921	0.669814	0.728287	1.2071	0.770082	0.541918	2.3307	2.83449	2.58974	3.00106	2.34236	1.30199	5	6	4.111	0.00449		solute carrier family 35, member G2	Homo sapiens solute carrier family 35, member G2 (SLC35G2), transcript variant 1, mRNA [NM_025246]	TGTTTGTCTTGTCATGATCCCAAACATTGTTGATGAAGACAATTCTTTGTTAAATGCCTG
A_32_P83784	NM_015230	ARAP2	Hs.479451	116984	hs|4p14	GO:0005547(phosphatidylinositol-3,4,5-trisphosphate binding)|GO:0005829(cytosol)|GO:0007264(small GTPase mediated signal transduction)|GO:0008060(ARF GTPase activator activity)|GO:0008270(zinc ion binding)|GO:0032312(regulation of ARF GTPase activity)|GO:0043547(positive regulation of GTPase activity)|GO:0051056(regulation of small GTPase mediated signal transduction)	0.0324238	0.104536	0.103781	0.13607	0.060701	0.141345	0.377916	0.36774	0.309537	0.417012	0.418102	0.262512	2	6	4.106	0.00112		ArfGAP with RhoGAP domain, ankyrin repeat and PH domain 2	Homo sapiens ArfGAP with RhoGAP domain, ankyrin repeat and PH domain 2 (ARAP2), mRNA [NM_015230]	ACAGGCCCATACTTCAGTCAGTCCAATCATAGTACAGTGATGTGGTGGTAGATGCTATGA
A_33_P3217238	NM_014109	ATAD2	Hs.370834	29028	hs|8q24.13	GO:0005524(ATP binding)|GO:0005634(nucleus)|GO:0006200(ATP catabolic process)|GO:0006351(transcription, DNA-dependent)|GO:0016887(ATPase activity)|GO:0045893(positive regulation of transcription, DNA-dependent)|GO:0070062(extracellular vesicular exosome)	1.4972	1.16385	1.28125	1.41626	0.853678	1.43922	4.40657	4.96576	4.38141	6.18305	5.57443	5.62466	6	6	4.105	3.23e-07		ATPase family, AAA domain containing 2	Homo sapiens ATPase family, AAA domain containing 2 (ATAD2), mRNA [NM_014109]	GCTGCACCACAATTCTGTACTTGAGTATCACAGTCATTGTTTTTGAGACAAACATTTTTA
A_24_P218979	NM_031299	CDCA3	Hs.524216	83461	hs|12p13.31	GO:0003674(molecular_function)|GO:0005575(cellular_component)|GO:0005829(cytosol)|GO:0007067(mitosis)|GO:0008150(biological_process)|GO:0016567(protein ubiquitination)	2.17128	3.19023	3.34083	2.82906	2.82271	3.24314	11.9591	11.7042	12.4716	13.3787	11.0997	10.9671	6	6	4.099	1.91e-07		cell division cycle associated 3	Homo sapiens cell division cycle associated 3 (CDCA3), mRNA [NM_031299]	ACACTACGACAGGGTAAGCGGCCTTCACCCCTAAGTGAAAATGTTAGTGAACTAAAGGAA
A_23_P133956	NM_002263	KIFC1	Hs.436912	3833	hs|6p21.32	GO:0000070(mitotic sister chromatid segregation)|GO:0003777(microtubule motor activity)|GO:0005524(ATP binding)|GO:0005634(nucleus)|GO:0005769(early endosome)|GO:0005815(microtubule organizing center)|GO:0005819(spindle)|GO:0005871(kinesin complex)|GO:0005874(microtubule)|GO:0007018(microtubule-based movement)|GO:0007596(blood coagulation)|GO:0008017(microtubule binding)|GO:0008152(metabolic proc…	2.94288	1.22408	1.68788	1.50398	1.72799	1.7787	6.51834	7.75927	7.61548	6.67964	6.42891	7.97787	6	6	4.092	2.61e-05		kinesin family member C1	Homo sapiens kinesin family member C1 (KIFC1), mRNA [NM_002263]	TGGTAGTGCTAAGATGCTCATGTTTGTGAACATTTCTCCACTGGAAGAGAACGTCTCCGA
A_23_P151150	NM_202002	FOXM1	Hs.239	2305	hs|12p13.33	GO:0000086(G2/M transition of mitotic cell cycle)|GO:0000122(negative regulation of transcription from RNA polymerase II promoter)|GO:0000278(mitotic cell cycle)|GO:0001558(regulation of cell growth)|GO:0001570(vasculogenesis)|GO:0001889(liver development)|GO:0003677(DNA binding)|GO:0003690(double-stranded DNA binding)|GO:0003700(sequence-specific DNA binding transcription factor activity)|GO:000…	6.4886	3.89795	5.04766	3.76198	4.7759	4.54274	15.8499	18.4713	18.2054	22.2233	17.0324	23.7271	6	6	4.077	1.46e-07		forkhead box M1	Homo sapiens forkhead box M1 (FOXM1), transcript variant 1, mRNA [NM_202002]	GGTAGGATGACCTGGGGTTTCAATTGACTTCTGTTCCTTGCTTTTAGTTTTGATAGAAGG
A_33_P3332970	NM_005127	CLEC2B	Hs.85201	9976	hs|12p13.31	GO:0005887(integral to plasma membrane)|GO:0030246(carbohydrate binding)	0.535494	0.320918	0.26592	0.246964	0.295052	0.307332	1.40696	1.35255	1.22654	1.19747	1.29464	1.28118	6	6	4.068	3.42e-05		C-type lectin domain family 2, member B	Homo sapiens C-type lectin domain family 2, member B (CLEC2B), mRNA [NM_005127]	ACACACCAATCAGAACTTGCCAGCTCCTCAAAACTTTACTAGGGCCAATAAACTTTCTTT
A_23_P430201	NM_152446	CEP128	Hs.162889	145508	hs|14q31.1	GO:0000922(spindle pole)|GO:0005737(cytoplasm)|GO:0005814(centriole)|GO:0005815(microtubule organizing center)	0.132268	0.439002	0.555347	0.504483	0.387771	0.416562	1.43162	1.64434	1.37567	1.80444	1.28334	1.56999	5	6	4.06	0.000923		centrosomal protein 128kDa	Homo sapiens centrosomal protein 128kDa (CEP128), mRNA [NM_152446]	GGCCAAATATCCTACTGTGATCACTTCAGTCATATCCTGGACCGTCTTTGGTTTACTGTG
A_23_P23303	NM_003686	EXO1	Hs.498248	9156	hs|1q43	GO:0000737(DNA catabolic process, endonucleolytic)|GO:0000738(DNA catabolic process, exonucleolytic)|GO:0002455(humoral immune response mediated by circulating immunoglobulin)|GO:0003677(DNA binding)|GO:0004523(ribonuclease H activity)|GO:0004527(exonuclease activity)|GO:0005515(protein binding)|GO:0005634(nucleus)|GO:0006281(DNA repair)|GO:0006298(mismatch repair)|GO:0006310(DNA recombination)|G…	0.678449	0.658062	0.697707	0.576921	0.644416	0.655525	2.61919	2.62007	2.55439	2.92109	2.40934	2.74526	6	6	4.057	4.79e-12		exonuclease 1	Homo sapiens exonuclease 1 (EXO1), transcript variant 3, mRNA [NM_003686]	AAGCATCCAGAAGAGAAAGCATCATAATGCCGAGAACAAGCCGGGGTTACAGATCAAACT
A_32_P96719	NM_024745	SHCBP1	Hs.123253	79801	hs|16q11.2	GO:0008543(fibroblast growth factor receptor signaling pathway)|GO:0042169(SH2 domain binding)|GO:2000177(regulation of neural precursor cell proliferation)	1.40299	1.48108	1.80054	1.20971	1.36265	1.39086	5.47597	5.92697	5.85416	6.2119	5.57132	5.79793	6	6	4.055	2.07e-07		SHC SH2-domain binding protein 1	Homo sapiens SHC SH2-domain binding protein 1 (SHCBP1), mRNA [NM_024745]	ATTATTGAGACGTCAATGGGACGCATTTTTCTGTTGAGCTATGCAGTCGTCAAAACAGCG
A_23_P133123	NM_032117	MND1	Hs.294088	84057	hs|4q31.3	GO:0003677(DNA binding)|GO:0005634(nucleus)|GO:0006310(DNA recombination)|GO:0007126(meiosis)	0.445383	0.296097	0.328449	0.18113	0.346475	0.355808	1.12161	1.31381	1.4238	1.28377	1.07911	1.4709	6	6	4.051	2.2e-05		meiotic nuclear divisions 1 homolog (S. cerevisiae)	Homo sapiens meiotic nuclear divisions 1 homolog (S. cerevisiae) (MND1), transcript variant 1, mRNA [NM_032117]	AGAAGACTTTGACTACATAGACTAAAATATTCCATGGTGGTGAAGGATGTACAAGCTTGT
A_23_P148475	NM_012310	KIF4A	Hs.648326	24137	hs|Xq13.1	GO:0003677(DNA binding)|GO:0003777(microtubule motor activity)|GO:0005524(ATP binding)|GO:0005634(nucleus)|GO:0005694(chromosome)|GO:0005730(nucleolus)|GO:0005737(cytoplasm)|GO:0005829(cytosol)|GO:0005871(kinesin complex)|GO:0005876(spindle microtubule)|GO:0006996(organelle organization)|GO:0007018(microtubule-based movement)|GO:0007411(axon guidance)|GO:0007596(blood coagulation)|GO:0008017(micr…	0.797924	1.26748	1.38241	1.40867	1.30876	1.15645	5.21589	5.63485	5.01445	5.25353	4.01725	4.20423	6	6	4.046	4.57e-07		kinesin family member 4A	Homo sapiens kinesin family member 4A (KIF4A), mRNA [NM_012310]	GCTTGGGAGATGCTTTCAGGTTGCAGCCAGAAGGGGTTTTTTAAATGACTTCTCTGGATT
A_23_P139500	NM_030762	BHLHE41	Hs.177841	79365	hs|12p12.1	GO:0000122(negative regulation of transcription from RNA polymerase II promoter)|GO:0000978(RNA polymerase II core promoter proximal region sequence-specific DNA binding)|GO:0001078(RNA polymerase II core promoter proximal region sequence-specific DNA binding transcription factor activity involved in negative regulation of transcription)|GO:0001102(RNA polymerase II activating transcription facto…	0.0569685	0.0963896	0.119758	0.126012	0.0920345	0.116292	0.334437	0.317272	0.404255	0.53008	0.427418	0.399825	4	6	4.045	6.57e-06		basic helix-loop-helix family, member e41	Homo sapiens basic helix-loop-helix family, member e41 (BHLHE41), mRNA [NM_030762]	ACAACAGTCTGACTATGAGTGAGGAAAATATCTGGGTCTTTTCGTCAGTTTGGTGCATTT
A_23_P25150	NM_006897	HOXC9	Hs.658823	3225	hs|12q13.13	GO:0003700(sequence-specific DNA binding transcription factor activity)|GO:0005634(nucleus)|GO:0006351(transcription, DNA-dependent)|GO:0006355(regulation of transcription, DNA-dependent)|GO:0009952(anterior/posterior pattern specification)|GO:0043565(sequence-specific DNA binding)|GO:0048704(embryonic skeletal system morphogenesis)	0.395723	0.334342	0.389219	0.202786	0.349516	0.411284	1.34442	1.25848	1.6048	1.31078	1.23664	1.4817	6	6	4.039	1.11e-05		homeobox C9	Homo sapiens homeobox C9 (HOXC9), mRNA [NM_006897]	AGAAAACTCTTGCGATTTGGGAGGGTTCAGTGTTGAGATATTGGTGTTTTAGAGTTAGTT
A_23_P143190	NM_002466	MYBL2	Hs.179718	4605	hs|20q13.12	GO:0000086(G2/M transition of mitotic cell cycle)|GO:0000278(mitotic cell cycle)|GO:0000978(RNA polymerase II core promoter proximal region sequence-specific DNA binding)|GO:0001077(RNA polymerase II core promoter proximal region sequence-specific DNA binding transcription factor activity involved in positive regulation of transcription)|GO:0003682(chromatin binding)|GO:0003700(sequence-specific …	5.41145	4.09846	5.13589	3.99199	4.49384	4.76044	18.919	15.5311	18.8657	19.3243	19.6127	20.104	6	6	4.039	1.89e-09		v-myb avian myeloblastosis viral oncogene homolog-like 2	Homo sapiens v-myb avian myeloblastosis viral oncogene homolog-like 2 (MYBL2), transcript variant 1, mRNA [NM_002466]	CTTCCAGCCTCACCCTGTCAGGTATCAAAGAAGACAACAGCTTGCTCAACCAGGGCTTCT
A_23_P100344	NM_014321	ORC6	Hs.49760	23594	hs|16q11.2	GO:0000082(G1/S transition of mitotic cell cycle)|GO:0000278(mitotic cell cycle)|GO:0000808(origin recognition complex)|GO:0003677(DNA binding)|GO:0005515(protein binding)|GO:0005654(nucleoplasm)|GO:0005664(nuclear origin of replication recognition complex)|GO:0006260(DNA replication)|GO:0006261(DNA-dependent DNA replication)	1.08652	1.84524	1.91853	1.58078	1.79736	1.65048	6.15226	5.93993	7.99811	7.18253	6.34832	5.83697	6	6	4.035	5.31e-07		origin recognition complex, subunit 6	Homo sapiens origin recognition complex, subunit 6 (ORC6), transcript variant 1, mRNA [NM_014321]	ACATTCCAAACTGATAGTACATTGCCATCTCCAGGAAGACTTGACGGCTTTGGGATTTTG
A_23_P46470	NM_018948	ERRFI1	Hs.605445	54206	hs|1p36.23	GO:0005100(Rho GTPase activator activity)|GO:0005515(protein binding)|GO:0005634(nucleus)|GO:0005737(cytoplasm)|GO:0006950(response to stress)|GO:0007175(negative regulation of epidermal growth factor-activated receptor activity)|GO:0019901(protein kinase binding)|GO:0031234(extrinsic to internal side of plasma membrane)|GO:0031953(negative regulation of protein autophosphorylation)|GO:0032321(po…	1.20742	3.09947	2.47854	3.30081	2.48333	2.52788	9.38098	9.36958	10.0567	11.5596	9.18276	8.82701	6	6	4.034	0.000123		ERBB receptor feedback inhibitor 1	Homo sapiens ERBB receptor feedback inhibitor 1 (ERRFI1), mRNA [NM_018948]	TCAGTATTTCCTGGGGATTGTTTGCTTTTTAAGTAAAACACTTCTGACCCATAGCTCAGT
A_23_P166248	NM_004414	RCAN1	Hs.282326	1827	hs|21q22.12	GO:0003677(DNA binding)|GO:0003700(sequence-specific DNA binding transcription factor activity)|GO:0005515(protein binding)|GO:0005634(nucleus)|GO:0005737(cytoplasm)|GO:0006355(regulation of transcription, DNA-dependent)|GO:0007165(signal transduction)|GO:0007417(central nervous system development)|GO:0008015(blood circulation)|GO:0009612(response to mechanical stimulus)|GO:0019722(calcium-mediat…	4.29604	2.32311	2.16204	3.55884	2.93136	2.7714	11.0579	12.1831	12.451	11.8164	10.0743	13.4661	6	6	4.034	9.72e-06		regulator of calcineurin 1	Homo sapiens regulator of calcineurin 1 (RCAN1), transcript variant 1, mRNA [NM_004414]	AATGCCAAGTAACAATGCATGCTTTGGAAATTTGGAAGATGGTTTTATTCTTTGAGAAGC
A_24_P349616	NM_001076683	UBTF	Hs.89781	7343	hs|17q21.31	GO:0000183(chromatin silencing at rDNA)|GO:0003677(DNA binding)|GO:0005515(protein binding)|GO:0005654(nucleoplasm)|GO:0005730(nucleolus)|GO:0006356(regulation of transcription from RNA polymerase I promoter)|GO:0006360(transcription from RNA polymerase I promoter)|GO:0006361(transcription initiation from RNA polymerase I promoter)|GO:0006362(transcription elongation from RNA polymerase I promote…	1.43137	1.53593	1.68765	1.85571	1.73009	1.65838	6.62614	5.88726	7.04791	6.56278	6.78651	6.86506	6	6	4.026	2.63e-10		upstream binding transcription factor, RNA polymerase I	Homo sapiens upstream binding transcription factor, RNA polymerase I (UBTF), transcript variant 2, mRNA [NM_001076683]	GGAATGTATTTTCATTTAAAAACAACTTTGAATGGGGCACTTTTTCTTTCCTGTTTTAAA
A_32_P172864	NM_001010883	FAM102B	Hs.200230	284611	hs|1p13.3		2.46631	1.88169	2.01781	1.91828	1.88709	2.00542	7.15484	8.39584	6.88631	9.06465	8.08716	9.30257	6	6	4.009	1.8e-09		family with sequence similarity 102, member B	Homo sapiens family with sequence similarity 102, member B (FAM102B), mRNA [NM_001010883]	GTTGACCAAATCCCATGGAGAAAAGACATCTCATTTGAGGTTCCCCTTCCTCTCATGTGT
A_23_P94422	NM_014791	MELK	Hs.184339	9833	hs|9p13.2	GO:0000086(G2/M transition of mitotic cell cycle)|GO:0004674(protein serine/threonine kinase activity)|GO:0004715(non-membrane spanning protein tyrosine kinase activity)|GO:0005509(calcium ion binding)|GO:0005515(protein binding)|GO:0005524(ATP binding)|GO:0005886(plasma membrane)|GO:0005938(cell cortex)|GO:0006915(apoptotic process)|GO:0008283(cell proliferation)|GO:0008289(lipid binding)|GO:000…	1.03677	1.85223	1.66633	1.91357	1.94257	1.91721	6.22193	7.30782	6.54622	6.41699	7.25384	6.81393	6	6	4.007	1.51e-05		maternal embryonic leucine zipper kinase	Homo sapiens maternal embryonic leucine zipper kinase (MELK), transcript variant 1, mRNA [NM_014791]	GGAAAGTGACAATGCAATTTGAATTAGAAGTGTGCCAGCTTCAAAAACCCGATGTGGTGG
A_23_P88331	NM_014750	DLGAP5	Hs.77695	9787	hs|14q22.3	GO:0000087(M phase of mitotic cell cycle)|GO:0004721(phosphoprotein phosphatase activity)|GO:0005515(protein binding)|GO:0005634(nucleus)|GO:0005737(cytoplasm)|GO:0005815(microtubule organizing center)|GO:0007079(mitotic chromosome movement towards spindle pole)|GO:0007267(cell-cell signaling)|GO:0008283(cell proliferation)|GO:0016311(dephosphorylation)|GO:0031616(spindle pole centrosome)|GO:0045…	8.98173	5.49015	6.19151	4.87456	6.68014	6.21425	26.0977	24.9516	21.6123	25.6793	24.3988	28.9368	6	6	4.006	1.41e-06		discs, large (Drosophila) homolog-associated protein 5	Homo sapiens discs, large (Drosophila) homolog-associated protein 5 (DLGAP5), transcript variant 1, mRNA [NM_014750]	ATCCATTTACTCAGCTGGAGAGGAGACATCAAGAACATGCCAGACACATTTCTTTTGGTG
A_24_P183150	NM_002090	CXCL3	Hs.89690	2921	hs|4q13.3	GO:0005576(extracellular region)|GO:0005615(extracellular space)|GO:0006954(inflammatory response)|GO:0006955(immune response)|GO:0008009(chemokine activity)|GO:0030593(neutrophil chemotaxis)	0.278017	0.395666	0.408531	0.497984	0.402262	0.345426	1.4187	1.50066	1.80103	1.37872	1.65893	1.46249	6	6	4.005	5.48e-07		chemokine (C-X-C motif) ligand 3	Homo sapiens chemokine (C-X-C motif) ligand 3 (CXCL3), mRNA [NM_002090]	GATGTGAGTGTGTTTCATCAAACATAGCTCAGTCCTGATTATTTAATTGGAATATGATGG
A_24_P84898	NM_004111	FEN1	Hs.409065	2237	hs|11q12.2	GO:0000278(mitotic cell cycle)|GO:0000287(magnesium ion binding)|GO:0000722(telomere maintenance via recombination)|GO:0000723(telomere maintenance)|GO:0000737(DNA catabolic process, endonucleolytic)|GO:0000738(DNA catabolic process, exonucleolytic)|GO:0003677(DNA binding)|GO:0003684(damaged DNA binding)|GO:0003690(double-stranded DNA binding)|GO:0004519(endonuclease activity)|GO:0004523(ribonucl…	0.921872	1.4627	1.40988	1.3277	1.4644	1.58707	4.93251	6.20195	5.19695	6.26723	5.03646	4.77744	6	6	3.998	2.67e-07		flap structure-specific endonuclease 1	Homo sapiens flap structure-specific endonuclease 1 (FEN1), mRNA [NM_004111]	CCTTAAGAGCTACAGCTAGAGAAACCTTCACAGGGGTGGAGAGAGCATTCTAAGGTTTTT
A_24_P387609	NM_030940	ISCA1	Hs.449291	81689	hs|9q21.33	GO:0005198(structural molecule activity)|GO:0005739(mitochondrion)|GO:0016226(iron-sulfur cluster assembly)|GO:0046872(metal ion binding)|GO:0051536(iron-sulfur cluster binding)	0.0361134	0.311395	0.34812	0.613497	0.214433	0.215912	0.811074	0.988196	0.966546	1.00749	0.877125	0.655137	5	6	3.99	0.0164		iron-sulfur cluster assembly 1	Homo sapiens iron-sulfur cluster assembly 1 (ISCA1), mRNA [NM_030940]	TCTTCAACTATAGTACAGATTAGTTCTGAGTGATGGTATCAAAAGGTGAGAAAGACGTCA
A_23_P114947	NM_002923	RGS2	Hs.78944	5997	hs|1q31.2	GO:0005096(GTPase activator activity)|GO:0005515(protein binding)|GO:0005516(calmodulin binding)|GO:0005730(nucleolus)|GO:0005737(cytoplasm)|GO:0005739(mitochondrion)|GO:0005829(cytosol)|GO:0005886(plasma membrane)|GO:0006417(regulation of translation)|GO:0007049(cell cycle)|GO:0007283(spermatogenesis)|GO:0008277(regulation of G-protein coupled receptor protein signaling pathway)|GO:0009898(inter…	4.67408	3.67679	3.48871	2.72897	3.53549	3.24011	12.3281	13.0375	15.0896	15.6565	13.4909	14.7025	6	6	3.987	2.48e-07		regulator of G-protein signaling 2, 24kDa	Homo sapiens regulator of G-protein signaling 2, 24kDa (RGS2), mRNA [NM_002923]	TAGATCTGGGATTATGTGGCCTTAGGTAGCTGGTTGTACATCTTTCCCTAAATCGATCCA
A_23_P115246	NM_003665	FCN3	Hs.333383	8547	hs|1p36.11	GO:0001867(complement activation, lectin pathway)|GO:0005515(protein binding)|GO:0005576(extracellular region)|GO:0005581(collagen)|GO:0006956(complement activation)|GO:0030246(carbohydrate binding)|GO:0045087(innate immune response)|GO:0072562(blood microparticle)	0.0471763	0.0360862	0.0289095	0.041807	0.0255506	0.101879	0.187119	0.178677	0.243103	0.126247	0.110813	0.188094	0	4	3.983	0.000332		ficolin (collagen/fibrinogen domain containing) 3	Homo sapiens ficolin (collagen/fibrinogen domain containing) 3 (FCN3), transcript variant 1, mRNA [NM_003665]	ATTGTCCACGGTGCCTGGTGGTATGCATCCTGTTACCGATCAAATCTCAATGGTCGCTAT
A_24_P76018	NM_001123040	ARIH2OS	Hs.720727	646450	hs|3p21.31	GO:0016021(integral to membrane)	0.120585	0.213504	0.254482	0.181502	0.277525	0.190266	0.803549	0.760995	0.688358	0.74521	1.05337	0.756853	5	6	3.981	1.32e-05		ariadne homolog 2 opposite strand	Homo sapiens ariadne homolog 2 opposite strand (ARIH2OS), mRNA [NM_001123040]	TCTTTTCACAGTATAGGAGTTGTCATCATGACTTCCAGTTACCTTCTGGGACCGGTTGTC
A_33_P3319870	NM_001191323	GREM1	Hs.40098	26585	hs|15q13.3	GO:0000902(cell morphogenesis)|GO:0001658(branching involved in ureteric bud morphogenesis)|GO:0002042(cell migration involved in sprouting angiogenesis)|GO:0002092(positive regulation of receptor internalization)|GO:0003257(positive regulation of transcription from RNA polymerase II promoter involved in myocardial precursor cell differentiation)|GO:0003337(mesenchymal to epithelial transition in…	0.0588145	0.0513025	0.0375408	0.0784368	0.0225135	0.039425	0.12721	0.141119	0.199771	0.22934	0.177791	0.212904	1	4	3.976	0.000147		gremlin 1, DAN family BMP antagonist	Homo sapiens gremlin 1, DAN family BMP antagonist (GREM1), transcript variant 2, mRNA [NM_001191323]	GGTGTGTCTTCCAACTTTCATTGAAAATGCCATATCTATACCATATTTTATTCGAGTCAC
A_33_P3397443	NM_182687	PKMYT1	Hs.732385	9088	hs|16p13.3	GO:0000079(regulation of cyclin-dependent protein kinase activity)|GO:0000082(G1/S transition of mitotic cell cycle)|GO:0000086(G2/M transition of mitotic cell cycle)|GO:0000139(Golgi membrane)|GO:0000278(mitotic cell cycle)|GO:0004672(protein kinase activity)|GO:0004674(protein serine/threonine kinase activity)|GO:0005515(protein binding)|GO:0005524(ATP binding)|GO:0005654(nucleoplasm)|GO:000578…	4.37909	2.29875	2.69905	2.24482	2.22914	2.67953	10.277	8.9221	10.5701	11.011	10.6905	12.4562	6	6	3.968	8.29e-06		protein kinase, membrane associated tyrosine/threonine 1	Homo sapiens protein kinase, membrane associated tyrosine/threonine 1 (PKMYT1), transcript variant 2, mRNA [NM_182687]	TCGGGAACTCCCATGGTCTTCTCTGCCTGGCCGTGTCTAATAAAAAGTATTTGAACCTTG
A_23_P326204	NM_152621	SGMS2	Hs.595423	166929	hs|4q25	GO:0005794(Golgi apparatus)|GO:0005886(plasma membrane)|GO:0005887(integral to plasma membrane)|GO:0006665(sphingolipid metabolic process)|GO:0006686(sphingomyelin biosynthetic process)|GO:0016301(kinase activity)|GO:0016310(phosphorylation)|GO:0030148(sphingolipid biosynthetic process)|GO:0030173(integral to Golgi membrane)|GO:0033188(sphingomyelin synthase activity)|GO:0044281(small molecule me…	0.692947	0.505315	0.451111	0.695268	0.601445	0.541072	1.90623	2.21382	2.49283	2.61035	2.11395	2.3084	6	6	3.941	9.97e-08		sphingomyelin synthase 2	Homo sapiens sphingomyelin synthase 2 (SGMS2), transcript variant 1, mRNA [NM_152621]	TCGACCTGAGGAGCAAAACAAAGGCATCAGCTCTTACACCAAAAGAGTTAACGCTGTAAC
A_33_P3240843	NM_144649	TMEM71	Hs.293842	137835	hs|8q24.22	GO:0016021(integral to membrane)	0.035316	0.15828	0.13115	0.124176	0.0810917	0.149765	0.341434	0.349271	0.470575	0.37686	0.418624	0.464808	4	6	3.937	0.00156		transmembrane protein 71	Homo sapiens transmembrane protein 71 (TMEM71), transcript variant 1, mRNA [NM_144649]	AAGAGGTCTTCTTTCAGGCAATCCTGCTTGCTGTGTGCTTAATCATTTCTGCATGTGCAA
A_23_P31453	NM_012449	STEAP1	Hs.61635	26872	hs|7q21.13	GO:0005215(transporter activity)|GO:0005886(plasma membrane)|GO:0005887(integral to plasma membrane)|GO:0005911(cell-cell junction)|GO:0006811(ion transport)|GO:0010008(endosome membrane)|GO:0015267(channel activity)|GO:0016491(oxidoreductase activity)|GO:0046872(metal ion binding)|GO:0055072(iron ion homeostasis)|GO:0055085(transmembrane transport)|GO:0055114(oxidation-reduction process)	1.5885	0.974341	1.08926	1.06348	1.03731	1.61904	5.02432	4.99308	4.33588	4.52295	4.56543	4.83834	6	6	3.917	1.14e-05		six transmembrane epithelial antigen of the prostate 1	Homo sapiens six transmembrane epithelial antigen of the prostate 1 (STEAP1), mRNA [NM_012449]	GACGTCACCAAAATTAACAAAACTGAGATATGTTCCCAGTTGTAGAATTACTGTTTACAC
A_33_P3212188	NM_002333	LRP3	Hs.515340	4037	hs|19q13.11	GO:0005905(coated pit)|GO:0006898(receptor-mediated endocytosis)|GO:0016021(integral to membrane)	0.131713	0.0897923	0.0597745	0.0433495	0.0531903	0.0284781	0.138798	0.189569	0.273712	0.272018	0.39402	0.216771	0	4	3.916	0.000664		low density lipoprotein receptor-related protein 3	Homo sapiens low density lipoprotein receptor-related protein 3 (LRP3), mRNA [NM_002333]	AACAAAACAAAACTTTTTTGCCAAAACACCTCCTCAATAAACAACATGTAAACAGAAACA
A_23_P71037	NM_000600	IL6	Hs.654458	3569	hs|7p15.3	GO:0001781(neutrophil apoptotic process)|GO:0002384(hepatic immune response)|GO:0002446(neutrophil mediated immunity)|GO:0002548(monocyte chemotaxis)|GO:0002675(positive regulation of acute inflammatory response)|GO:0002690(positive regulation of leukocyte chemotaxis)|GO:0005125(cytokine activity)|GO:0005138(interleukin-6 receptor binding)|GO:0005515(protein binding)|GO:0005576(extracellular regi…	2.06343	2.90627	2.57487	2.89107	2.44298	2.34391	9.61616	9.71855	11.8726	10.1969	9.15743	8.8122	6	6	3.91	4.36e-09		interleukin 6	Homo sapiens interleukin 6 (IL6), mRNA [NM_000600]	ATTGTTGTTGTTAATGGGCATTCCTTCTTCTGGTCAGAAACCTGTCCACTGGGCACAGAA
A_33_P3410194	NM_005324	H3F3B	Hs.180877	3021	hs|17q25.1	GO:0000228(nuclear chromosome)|GO:0000788(nuclear nucleosome)|GO:0000979(RNA polymerase II core promoter sequence-specific DNA binding)|GO:0000980(RNA polymerase II distal enhancer sequence-specific DNA binding)|GO:0005515(protein binding)|GO:0005576(extracellular region)|GO:0005634(nucleus)|GO:0005654(nucleoplasm)|GO:0006336(DNA replication-independent nucleosome assembly)|GO:0007420(brain devel…	1.89598	1.58202	1.79697	2.11382	1.77964	1.41806	5.41094	7.69609	6.85729	7.37676	6.63201	7.33268	6	6	3.908	7.95e-09		H3 histone, family 3B (H3.3B)	Homo sapiens H3 histone, family 3B (H3.3B) (H3F3B), mRNA [NM_005324]	TGCTTCAGAATGAGATTAAGATCAGATGTTGGAACGTGCTATGCTGTAGCGTGTCTGGAA
A_23_P374844	NM_015973	GAL	Hs.278959	51083	hs|11q13.3	GO:0005184(neuropeptide hormone activity)|GO:0005515(protein binding)|GO:0005576(extracellular region)|GO:0005615(extracellular space)|GO:0005794(Golgi apparatus)|GO:0006954(inflammatory response)|GO:0007218(neuropeptide signaling pathway)|GO:0007399(nervous system development)|GO:0007631(feeding behavior)|GO:0010737(protein kinase A signaling cascade)|GO:0019933(cAMP-mediated signaling)|GO:00300…	0.356582	0.31653	0.257427	0.20448	0.253149	0.261211	0.88305	0.928132	1.15548	1.17816	1.09856	1.13864	6	6	3.906	2.73e-07		galanin/GMAP prepropeptide	Homo sapiens galanin/GMAP prepropeptide (GAL), mRNA [NM_015973]	TATGCAGAGTCAGCCATTCCTGTTCTCTTTGCCTTGATGTTGTGTTGTTATCATTTAAGA
A_23_P215505	NM_012294	RAPGEF5	Hs.174768	9771	hs|7p15.3	GO:0005088(Ras guanyl-nucleotide exchange factor activity)|GO:0005634(nucleus)|GO:0007264(small GTPase mediated signal transduction)|GO:0007399(nervous system development)|GO:0017034(Rap guanyl-nucleotide exchange factor activity)|GO:0030742(GTP-dependent protein binding)|GO:0032317(regulation of Rap GTPase activity)|GO:0032318(regulation of Ras GTPase activity)	0.277364	0.644399	0.820112	1.45508	0.767854	0.749253	2.48456	3.17804	2.72908	3.22143	3.16177	1.97291	6	6	3.902	0.000937		Rap guanine nucleotide exchange factor (GEF) 5	Homo sapiens Rap guanine nucleotide exchange factor (GEF) 5 (RAPGEF5), mRNA [NM_012294]	TCGTATTACACTGTTATTAAATACTGGGATGAAATCAGTGACCTGAAGCAAGAAATCTTG
A_23_P47077	NM_004281	BAG3	Hs.523309	9531	hs|10q26.11	GO:0005515(protein binding)|GO:0005737(cytoplasm)|GO:0005829(cytosol)|GO:0005886(plasma membrane)|GO:0006457(protein folding)|GO:0007420(brain development)|GO:0008625(induction of apoptosis via death domain receptors)|GO:0010664(negative regulation of striated muscle cell apoptotic process)|GO:0021510(spinal cord development)|GO:0030018(Z disc)|GO:0032403(protein complex binding)|GO:0043005(neuro…	1.57535	2.1374	1.12641	1.0977	1.25038	1.28497	5.47515	3.5293	6.87534	6.98944	4.66227	5.4456	6	6	3.901	3.12e-06		BCL2-associated athanogene 3	Homo sapiens BCL2-associated athanogene 3 (BAG3), mRNA [NM_004281]	ACTTTGAAGGCAAGAAGACTGACAAAAAGTACCTGATGATCGAAGAGTATTTGACCAAAG
A_33_P3380992	NM_001080538	AKR1B15	Hs.729418	441282	hs|7q33	GO:0016491(oxidoreductase activity)|GO:0055114(oxidation-reduction process)	0.304454	0.190514	0.20559	0.23326	0.226687	0.210006	0.745367	0.831428	0.96156	1.01572	0.878824	0.873745	6	6	3.898	5.6e-08		aldo-keto reductase family 1, member B15	Homo sapiens aldo-keto reductase family 1, member B15 (AKR1B15), mRNA [NM_001080538]	AAATTGAGTGATGAGGAGATGGCAACCATACTCAGCTTCAACAGAAACTGGAGGGCCTTT
A_23_P126266	NM_021958	HLX	Hs.74870	3142	hs|1q41	GO:0000976(transcription regulatory region sequence-specific DNA binding)|GO:0001889(liver development)|GO:0003700(sequence-specific DNA binding transcription factor activity)|GO:0005515(protein binding)|GO:0005634(nucleus)|GO:0006351(transcription, DNA-dependent)|GO:0006355(regulation of transcription, DNA-dependent)|GO:0007275(multicellular organismal development)|GO:0007519(skeletal muscle tis…	0.752895	0.66529	0.762974	0.715318	0.811473	0.872409	2.85966	2.36022	3.56217	3.33596	2.92718	2.89187	6	6	3.898	1.81e-08		H2.0-like homeobox	Homo sapiens H2.0-like homeobox (HLX), mRNA [NM_021958]	AGGCCTGGAGAAAAGGTTTGAGATTCAGAAGTACGTGACCAAGCCGGACCGAAAGCAGCT
A_23_P375	NM_018101	CDCA8	Hs.524571	55143	hs|1p34.3	GO:0000089(mitotic metaphase)|GO:0000278(mitotic cell cycle)|GO:0000775(chromosome, centromeric region)|GO:0005515(protein binding)|GO:0005634(nucleus)|GO:0005730(nucleolus)|GO:0005819(spindle)|GO:0005829(cytosol)|GO:0007067(mitosis)|GO:0010369(chromocenter)|GO:0030496(midbody)|GO:0032133(chromosome passenger complex)|GO:0043234(protein complex)|GO:0045171(intercellular bridge)|GO:0051276(chromos…	8.1617	6.85867	7.08916	5.82315	6.94277	7.09019	23.5553	25.7773	30.1628	29.1924	24.8492	29.9991	6	6	3.897	8.59e-10		cell division cycle associated 8	Homo sapiens cell division cycle associated 8 (CDCA8), transcript variant 2, mRNA [NM_018101]	CCCAGGCTTGAAGGCACATGGCTTTCTCATGTAGGGCTCTCTGTGGTATTTGTTATTATT
A_23_P29005	NM_022136	SAMSN1	Hs.473341	64092	hs|21q11.2	GO:0001726(ruffle)|GO:0001784(phosphotyrosine binding)|GO:0002820(negative regulation of adaptive immune response)|GO:0005634(nucleus)|GO:0005737(cytoplasm)|GO:0050732(negative regulation of peptidyl-tyrosine phosphorylation)|GO:0050869(negative regulation of B cell activation)	0.190892	0.635474	0.715257	0.826396	0.592272	0.43237	1.79585	2.40351	2.02564	2.43752	1.8446	1.63444	6	6	3.896	0.00101		SAM domain, SH3 domain and nuclear localization signals 1	Homo sapiens SAM domain, SH3 domain and nuclear localization signals 1 (SAMSN1), transcript variant 1, mRNA [NM_022136]	CTCTGGTTGCTATATCTCATCAGGAAATTCAGATAATGGCAAAGAGGATCTGGAGTCTGA
A_23_P96325	NM_017669	ERCC6L	Hs.47558	54821	hs|Xq13.1	GO:0000278(mitotic cell cycle)|GO:0000777(condensed chromosome kinetochore)|GO:0003677(DNA binding)|GO:0004386(helicase activity)|GO:0005515(protein binding)|GO:0005524(ATP binding)|GO:0005829(cytosol)|GO:0007067(mitosis)|GO:0008152(metabolic process)	0.185947	0.299853	0.364274	0.349096	0.32474	0.309053	1.22417	1.19712	1.13499	1.37573	1.02058	1.06305	6	6	3.894	5.6e-06		excision repair cross-complementation group 6-like	Homo sapiens excision repair cross-complementation group 6-like (ERCC6L), mRNA [NM_017669]	ACACTGTCTTCAGAAAACAAGTCCAGCTGGTTAATGACGTCTAAGCCTAGTGCTCTAGCT
A_24_P931443	NM_003485	GPR68	Hs.8882	8111	hs|14q32.11	GO:0004930(G-protein coupled receptor activity)|GO:0005886(plasma membrane)|GO:0005887(integral to plasma membrane)|GO:0006954(inflammatory response)|GO:0007186(G-protein coupled receptor signaling pathway)	0.648196	0.326487	0.188135	0.342235	0.347985	0.409061	1.24049	1.20514	1.44819	1.64113	1.33869	1.39395	6	6	3.881	0.00024		G protein-coupled receptor 68	Homo sapiens G protein-coupled receptor 68 (GPR68), transcript variant 2, mRNA [NM_003485]	TACTGTCAAGAGTTGTATTTTTGTATTGTCCTTTTTGCCAAGTCTACATGTGTTGACTCT
A_33_P3345608	NM_001202438	EDRF1	Hs.468688	26098	hs|10q26.13	GO:0005634(nucleus)|GO:0006351(transcription, DNA-dependent)|GO:0006355(regulation of transcription, DNA-dependent)	0.0306193	0.210337	0.202435	0.191565	0.152328	0.117385	0.487403	0.507893	0.498945	0.501068	0.425448	0.577861	5	6	3.879	0.00602		erythroid differentiation regulatory factor 1	Homo sapiens erythroid differentiation regulatory factor 1 (EDRF1), transcript variant 1, mRNA [NM_001202438]	TCATTACCAAACAAAAGAAGACCAGGAGATCCTGCATAGCCTTCACAGAGAGTCCAGTTG
A_24_P419211	NM_004685	MTMR6	Hs.643702	9107	hs|13q12.13	GO:0004722(protein serine/threonine phosphatase activity)|GO:0004725(protein tyrosine phosphatase activity)|GO:0005635(nuclear envelope)|GO:0005737(cytoplasm)|GO:0005829(cytosol)|GO:0006470(protein dephosphorylation)|GO:0006644(phospholipid metabolic process)|GO:0006661(phosphatidylinositol biosynthetic process)|GO:0015269(calcium-activated potassium channel activity)|GO:0035335(peptidyl-tyrosine…	0.192098	1.04462	0.990059	1.14208	0.785288	0.567181	2.77419	2.79362	2.2694	3.19027	2.4802	2.47208	5	6	3.879	0.00386		myotubularin related protein 6	Homo sapiens myotubularin related protein 6 (MTMR6), mRNA [NM_004685]	AGAAACAAAACATAAAAACCCCAAAACTATCACTTGGAATTAGCAATATCACCCAACTGG
A_33_P3384871	NM_001142522	FBXO5	Hs.520506	26271	hs|6q25.2	GO:0000082(G1/S transition of mitotic cell cycle)|GO:0000083(regulation of transcription involved in G1/S phase of mitotic cell cycle)|GO:0000278(mitotic cell cycle)|GO:0001556(oocyte maturation)|GO:0005515(protein binding)|GO:0005634(nucleus)|GO:0005654(nucleoplasm)|GO:0005730(nucleolus)|GO:0005737(cytoplasm)|GO:0005819(spindle)|GO:0005829(cytosol)|GO:0007057(spindle assembly involved in female …	1.2847	1.23993	1.30979	1.40642	1.37481	0.724834	4.02267	6.36688	4.33557	4.11932	4.64762	4.65186	6	6	3.874	1.99e-06		F-box protein 5	Homo sapiens F-box protein 5 (FBXO5), transcript variant 2, mRNA [NM_001142522]	GGTTTTCCATCTGTTAGCATTTCAGACATTTTATGTTCCTCTTACTCAATTGATACCAAC
A_33_P3272231	NM_001136493	MFSD2A	Hs.655177	84879	hs|1p34.2	GO:0005548(phospholipid transporter activity)|GO:0005737(cytoplasm)|GO:0005789(endoplasmic reticulum membrane)|GO:0005886(plasma membrane)|GO:0005887(integral to plasma membrane)|GO:0015293(symporter activity)|GO:0015908(fatty acid transport)|GO:0015914(phospholipid transport)|GO:0045056(transcytosis)|GO:0055085(transmembrane transport)|GO:0060856(establishment of blood-brain barrier)	0.395121	0.198269	0.253809	0.205349	0.192211	0.320944	0.815764	1.06888	0.868471	1.0474	0.905373	1.1814	6	6	3.872	1.59e-05		major facilitator superfamily domain containing 2A	Homo sapiens major facilitator superfamily domain containing 2A (MFSD2A), transcript variant 1, mRNA [NM_001136493]	GTGTGTATGTATATGTCTGTGAGCTATTAATGTTATTAATTTTCATAAAAGCTGGAAAGC
A_23_P23815	NM_021194	SLC30A1	Hs.519469	7779	hs|1q32.3	GO:0001701(in utero embryonic development)|GO:0005385(zinc ion transmembrane transporter activity)|GO:0005515(protein binding)|GO:0005737(cytoplasm)|GO:0005783(endoplasmic reticulum)|GO:0005794(Golgi apparatus)|GO:0005886(plasma membrane)|GO:0006829(zinc ion transport)|GO:0006874(cellular calcium ion homeostasis)|GO:0006882(cellular zinc ion homeostasis)|GO:0016021(integral to membrane)|GO:001985…	0.902199	1.19339	1.18875	0.995962	1.05464	0.951649	3.61503	4.34916	3.89645	4.52506	3.9607	3.88699	6	6	3.865	2.24e-09		solute carrier family 30 (zinc transporter), member 1	Homo sapiens solute carrier family 30 (zinc transporter), member 1 (SLC30A1), mRNA [NM_021194]	ACAAGCCCCTTCTGGAAAGGATGCAGAAAAGACCCCAGCAGTTAGCATTTCTTGTTTAGA
A_33_P3236661	BC150296	PCDH9	Hs.654709	5101	hs|13q21.32	GO:0005509(calcium ion binding)|GO:0005886(plasma membrane)|GO:0007156(homophilic cell adhesion)|GO:0016021(integral to membrane)|GO:0030900(forebrain development)	0.324019	0.104184	0.17382	0.195678	0.181999	0.234139	0.630823	0.929374	0.737895	0.552285	0.610795	1.09877	6	6	3.854	5.02e-05		protocadherin 9	Homo sapiens protocadherin 9, mRNA (cDNA clone MGC:167030 IMAGE:8860363), complete cds. [BC150296]	GGATTAAGAGGCTGAGAAACTCATATTTCAACCAAATCCAGAATTAGTTTTTCTTAGGTC
A_24_P313109	NM_016617	UFM1	Hs.643655	51569	hs|13q13.3	GO:0005634(nucleus)|GO:0005737(cytoplasm)|GO:0034976(response to endoplasmic reticulum stress)|GO:0070062(extracellular vesicular exosome)|GO:0071569(protein ufmylation)	0.0363318	0.100507	0.174618	0.264429	0.103948	0.15766	0.314098	0.379813	0.63467	0.49781	0.679989	0.352531	3	6	3.853	0.00307		ubiquitin-fold modifier 1	Homo sapiens ubiquitin-fold modifier 1 (UFM1), transcript variant 1, mRNA [NM_016617]	AATACTTGACATAGTCTTAAGTAGAAGAAGGCAGTTAGAGAAAACAAAGTATCTACTGGC
A_33_P3302295	NM_005251	FOXC2	Hs.436448	2303	hs|16q24.1	GO:0000122(negative regulation of transcription from RNA polymerase II promoter)|GO:0001077(RNA polymerase II core promoter proximal region sequence-specific DNA binding transcription factor activity involved in positive regulation of transcription)|GO:0001503(ossification)|GO:0001569(patterning of blood vessels)|GO:0001656(metanephros development)|GO:0001657(ureteric bud development)|GO:0001756(…	1.95036	2.52743	2.43236	2.37758	2.2669	2.10465	9.46644	8.15774	9.69709	7.93258	9.97147	7.48281	6	6	3.85	2.2e-09		forkhead box C2 (MFH-1, mesenchyme forkhead 1)	Homo sapiens forkhead box C2 (MFH-1, mesenchyme forkhead 1) (FOXC2), mRNA [NM_005251]	AAACTTTCCCCAACGTGCGGGAGATGTTCAACTCCCACCGGCTGGGGATTGAGAACTCGA
A_33_P3300975	NM_014620	HOXC4	Hs.549040	3221	hs|12q13.13	GO:0003700(sequence-specific DNA binding transcription factor activity)|GO:0005515(protein binding)|GO:0005634(nucleus)|GO:0006351(transcription, DNA-dependent)|GO:0006355(regulation of transcription, DNA-dependent)|GO:0007275(multicellular organismal development)|GO:0043565(sequence-specific DNA binding)	0.117555	0.0675981	0.0942578	0.0276969	0.0788144	0.0729593	0.259905	0.27961	0.165491	0.348074	0.283561	0.32677	0	5	3.849	0.000453		homeobox C4	Homo sapiens homeobox C4 (HOXC4), transcript variant 1, mRNA [NM_014620]	TAGTGTCGATGTGAAATGCCCCGTGATCAATAATAAACCAGTGGATGTGAATTAGTTTTA
A_23_P69586	NM_005245	FAT1	Hs.481371	2195	hs|4q35.2	GO:0005509(calcium ion binding)|GO:0005515(protein binding)|GO:0005634(nucleus)|GO:0005886(plasma membrane)|GO:0005887(integral to plasma membrane)|GO:0005911(cell-cell junction)|GO:0007015(actin filament organization)|GO:0007155(cell adhesion)|GO:0007156(homophilic cell adhesion)|GO:0007163(establishment or maintenance of cell polarity)|GO:0007267(cell-cell signaling)|GO:0009653(anatomical struc…	0.423511	1.51049	1.53217	1.70084	1.40713	1.23438	4.43394	4.67552	4.36725	5.76614	4.37833	4.10853	6	6	3.847	0.00111		FAT atypical cadherin 1	Homo sapiens FAT atypical cadherin 1 (FAT1), mRNA [NM_005245]	AACTACTGTCATCGTGAGGTTTTCATCGGCTGTGCCATTTCCCAACGTCTTTTGGGATTT
A_23_P70328	NM_018132	CENPQ	Hs.88663	55166	hs|6p12.3	GO:0000278(mitotic cell cycle)|GO:0000775(chromosome, centromeric region)|GO:0005634(nucleus)|GO:0005654(nucleoplasm)|GO:0005730(nucleolus)|GO:0005737(cytoplasm)|GO:0005829(cytosol)|GO:0006334(nucleosome assembly)|GO:0034080(CenH3-containing nucleosome assembly at centromere)|GO:0045111(intermediate filament cytoskeleton)	0.307644	0.902404	0.911248	0.885137	0.842953	0.763156	2.84845	3.27792	2.79561	3.02233	2.43366	2.42856	6	6	3.846	0.000349		centromere protein Q	Homo sapiens centromere protein Q (CENPQ), mRNA [NM_018132]	CAATGGCTTACAGTTTCTGTCTGGTCATCTGGAACTTGAAAAATCCTCAAATGCCTTCAC
A_23_P65918	NM_002220	ITPKA	Hs.2722	3706	hs|15q15.1	GO:0004683(calmodulin-dependent protein kinase activity)|GO:0005516(calmodulin binding)|GO:0005524(ATP binding)|GO:0005829(cytosol)|GO:0006020(inositol metabolic process)|GO:0006468(protein phosphorylation)|GO:0007165(signal transduction)|GO:0008440(inositol-1,4,5-trisphosphate 3-kinase activity)|GO:0030036(actin cytoskeleton organization)|GO:0043197(dendritic spine)|GO:0043647(inositol phosphate…	0.328008	0.195095	0.287154	0.187	0.285977	0.204962	0.939374	1.00135	0.901153	0.933236	0.838119	0.983144	6	6	3.846	1.69e-05		inositol-trisphosphate 3-kinase A	Homo sapiens inositol-trisphosphate 3-kinase A (ITPKA), mRNA [NM_002220]	CCCTCTCCAGAGGTGCCAGACCGCGGATTTTATTTAGCAAGCCCAGACCTTCCGGTCTAA
A_23_P91697	NM_004737	LARGE	Hs.474667	9215	hs|22q12.3	GO:0006044(N-acetylglucosamine metabolic process)|GO:0006486(protein glycosylation)|GO:0006688(glycosphingolipid biosynthetic process)|GO:0008375(acetylglucosaminyltransferase activity)|GO:0009101(glycoprotein biosynthetic process)|GO:0016757(transferase activity, transferring glycosyl groups)|GO:0030173(integral to Golgi membrane)|GO:0046716(muscle cell homeostasis)	0.402401	0.297383	0.291223	0.2543	0.274099	0.23991	1.19354	1.11353	1.01351	1.12375	1.02332	1.18842	6	6	3.83	1.32e-06		like-glycosyltransferase	Homo sapiens like-glycosyltransferase (LARGE), transcript variant 1, mRNA [NM_004737]	AAGATTCACGTATCCATCTGGAGACCTACAGGAAGAAAGTGATTGGGTTCCTCTGGTTCT
A_33_P3349646	NM_002589	PCDH7	Hs.479439	5099	hs|4p15.1	GO:0005509(calcium ion binding)|GO:0005886(plasma membrane)|GO:0005887(integral to plasma membrane)|GO:0007156(homophilic cell adhesion)	0.220435	0.179408	0.152622	0.269518	0.22073	0.262296	0.703117	0.992483	0.773187	0.960867	0.707158	0.801722	6	6	3.823	7.38e-07		protocadherin 7	Homo sapiens protocadherin 7 (PCDH7), transcript variant a, mRNA [NM_002589]	ATTGGATCAGATCACTGCTCTGAGTACAGCTGTCAAACCAATAACAAGTACAGCAAACAG
A_23_P72096	NM_000575	IL1A	Hs.1722	3552	hs|2q13	GO:0001660(fever generation)|GO:0005125(cytokine activity)|GO:0005149(interleukin-1 receptor binding)|GO:0005507(copper ion binding)|GO:0005515(protein binding)|GO:0005576(extracellular region)|GO:0005615(extracellular space)|GO:0005829(cytosol)|GO:0006915(apoptotic process)|GO:0006954(inflammatory response)|GO:0006955(immune response)|GO:0008283(cell proliferation)|GO:0008285(negative regulation…	0.0345279	0.131287	0.130615	0.173154	0.162199	0.0756763	0.33225	0.4134	0.429747	0.393524	0.457104	0.366473	4	6	3.817	0.0027		interleukin 1, alpha	Homo sapiens interleukin 1, alpha (IL1A), mRNA [NM_000575]	TTATTATTCTTCATAACAATTTTAGGAGGACCAGAGCTACTGACTATGGCTACCAAAAAG
A_23_P104651	NM_080668	CDCA5	Hs.434886	113130	hs|11q13.1	GO:0000082(G1/S transition of mitotic cell cycle)|GO:0000278(mitotic cell cycle)|GO:0000775(chromosome, centromeric region)|GO:0000790(nuclear chromatin)|GO:0003682(chromatin binding)|GO:0005515(protein binding)|GO:0005634(nucleus)|GO:0005654(nucleoplasm)|GO:0005694(chromosome)|GO:0005730(nucleolus)|GO:0005737(cytoplasm)|GO:0005829(cytosol)|GO:0005886(plasma membrane)|GO:0006302(double-strand bre…	5.39508	2.55073	2.85078	2.41177	2.85244	3.35209	9.75758	13.1073	11.927	13.7141	10.7459	12.3248	6	6	3.811	2.15e-05		cell division cycle associated 5	Homo sapiens cell division cycle associated 5 (CDCA5), mRNA [NM_080668]	TCACCAGATGATGCAGAGTTGAGATCATCATTGCAAAGTTCTCTGTTCCTGAGGAACTAA
A_23_P117582	NM_130469	JDP2	Hs.196482	122953	hs|14q24.3	GO:0000122(negative regulation of transcription from RNA polymerase II promoter)|GO:0003682(chromatin binding)|GO:0003690(double-stranded DNA binding)|GO:0003700(sequence-specific DNA binding transcription factor activity)|GO:0005515(protein binding)|GO:0005634(nucleus)|GO:0006351(transcription, DNA-dependent)|GO:0031065(positive regulation of histone deacetylation)|GO:0043565(sequence-specific D…	0.493763	0.297449	0.268678	0.249874	0.296283	0.354301	1.28813	1.32633	1.17553	1.08318	1.07932	1.31586	6	6	3.795	9.41e-06		Jun dimerization protein 2	Homo sapiens Jun dimerization protein 2 (JDP2), transcript variant 1, mRNA [NM_130469]	GGGGTGCATTTCCATCCTTGTAAACCCTTCATAGTACTCAGTCCTGTATCGCTCAGTAAA
A_23_P167081	NM_005612	REST	Hs.307836	5978	hs|4q12	GO:0000122(negative regulation of transcription from RNA polymerase II promoter)|GO:0001046(core promoter sequence-specific DNA binding)|GO:0001047(core promoter binding)|GO:0001078(RNA polymerase II core promoter proximal region sequence-specific DNA binding transcription factor activity involved in negative regulation of transcription)|GO:0003682(chromatin binding)|GO:0003700(sequence-specific …	0.148363	0.137638	0.133351	0.185757	0.141651	0.168652	0.659043	0.492409	0.552108	0.680648	0.596954	0.491526	5	6	3.789	1.08e-08		RE1-silencing transcription factor	Homo sapiens RE1-silencing transcription factor (REST), transcript variant 1, mRNA [NM_005612]	ATCCACAGCCATGAAGGAAGTGACCTAAGTGACAACATGTCAGAGGGTAGTGATGATTCT
A_23_P163481	NM_001211	BUB1B	Hs.513645	701	hs|15q15.1	GO:0000278(mitotic cell cycle)|GO:0000776(kinetochore)|GO:0000777(condensed chromosome kinetochore)|GO:0000778(condensed nuclear chromosome kinetochore)|GO:0000940(condensed chromosome outer kinetochore)|GO:0004672(protein kinase activity)|GO:0004674(protein serine/threonine kinase activity)|GO:0005515(protein binding)|GO:0005524(ATP binding)|GO:0005680(anaphase-promoting complex)|GO:0005737(cyto…	1.68599	2.43631	2.67698	2.18869	2.57773	2.24475	9.18491	9.60094	7.95431	8.77133	7.70406	8.66795	6	6	3.787	2.77e-07		BUB1 mitotic checkpoint serine/threonine kinase B	Homo sapiens BUB1 mitotic checkpoint serine/threonine kinase B (BUB1B), mRNA [NM_001211]	CACAGTGTCTGTTCTTGGGGAGCTTGCAGCAGAAATGAATGGGGTTTTTGACACTACATT
A_33_P3363355	NM_022377	ICAM4	Hs.706750	3386	hs|19p13.2	GO:0005178(integrin binding)|GO:0005576(extracellular region)|GO:0005886(plasma membrane)|GO:0016021(integral to membrane)|GO:0016337(cell-cell adhesion)|GO:0030198(extracellular matrix organization)|GO:0050776(regulation of immune response)	0.169314	0.11137	0.156099	0.0661372	0.165167	0.135844	0.510606	0.568955	0.355246	0.47421	0.397693	0.647589	3	6	3.773	4.45e-05		intercellular adhesion molecule 4 (Landsteiner-Wiener blood group)	Homo sapiens intercellular adhesion molecule 4 (Landsteiner-Wiener blood group) (ICAM4), transcript variant 2, mRNA [NM_022377]	AATAAAAATAAATATTGGCGGGGGAACCCTCTGGAATCAATAAAGGCTTCCTTAACCAGC
A_23_P104323	NM_002412	MGMT	Hs.501522	4255	hs|10q26.3	GO:0003677(DNA binding)|GO:0003908(methylated-DNA-[protein]-cysteine S-methyltransferase activity)|GO:0005509(calcium ion binding)|GO:0005634(nucleus)|GO:0005654(nucleoplasm)|GO:0006266(DNA ligation)|GO:0006281(DNA repair)|GO:0006306(DNA methylation)|GO:0006307(DNA dealkylation involved in DNA repair)|GO:0008168(methyltransferase activity)|GO:0009008(DNA-methyltransferase activity)|GO:0009636(res…	0.424452	0.318728	0.275929	0.254842	0.261551	0.313481	1.12868	1.17766	1.30134	0.997381	1.09319	1.19092	6	6	3.772	8.86e-07		O-6-methylguanine-DNA methyltransferase	Homo sapiens O-6-methylguanine-DNA methyltransferase (MGMT), mRNA [NM_002412]	TCTTCACCATCCCGTTTTCCAGCAAGAGTCGTTCACCAGACAGGTGTTATGGAAGCTGCT
A_23_P110403	NM_014476	PDLIM3	Hs.701364	27295	hs|4q35.1	GO:0005515(protein binding)|GO:0005737(cytoplasm)|GO:0007015(actin filament organization)|GO:0007507(heart development)|GO:0008092(cytoskeletal protein binding)|GO:0008270(zinc ion binding)|GO:0008307(structural constituent of muscle)|GO:0015629(actin cytoskeleton)|GO:0030018(Z disc)	0.273437	0.407883	0.209138	0.339561	0.402969	0.282194	0.787676	1.35321	1.25778	1.43302	1.02171	1.31007	6	6	3.767	2.93e-06		PDZ and LIM domain 3	Homo sapiens PDZ and LIM domain 3 (PDLIM3), transcript variant 1, mRNA [NM_014476]	AAACATACACTTAGCTATGTTTTGCAACTCTTTTTGGGGCTAGCAATAATGATATTTAAA
A_24_P399980	NM_014799	HEPH	Hs.31720	9843	hs|Xq12	GO:0004322(ferroxidase activity)|GO:0005507(copper ion binding)|GO:0005622(intracellular)|GO:0005886(plasma membrane)|GO:0006825(copper ion transport)|GO:0006826(iron ion transport)|GO:0006879(cellular iron ion homeostasis)|GO:0008198(ferrous iron binding)|GO:0016021(integral to membrane)|GO:0016323(basolateral plasma membrane)|GO:0048471(perinuclear region of cytoplasm)|GO:0055085(transmembrane …	0.0831074	0.0812302	0.0803219	0.0876651	0.0973965	0.129362	0.260872	0.315374	0.42176	0.376892	0.295235	0.441405	2	6	3.764	4.42e-07		hephaestin	Homo sapiens hephaestin (HEPH), transcript variant 2, mRNA [NM_014799]	CATGCAGATCCCCATAAAGAATGTTGAGATGCTGGCCTCTGTTTTGGTTGCCATTAGTGT
A_24_P916378	ENST00000410076	HNRNPLL	Hs.445497	92906	hs|2p22.1	GO:0000166(nucleotide binding)|GO:0003729(mRNA binding)|GO:0005515(protein binding)|GO:0005634(nucleus)|GO:0006397(mRNA processing)|GO:0030529(ribonucleoprotein complex)|GO:0033120(positive regulation of RNA splicing)	0.0484461	0.128426	0.110121	0.156824	0.0875129	0.100768	0.399126	0.476494	0.380541	0.443067	0.26856	0.312551	3	6	3.763	0.000129		heterogeneous nuclear ribonucleoprotein L-like	heterogeneous nuclear ribonucleoprotein L-like [Source:HGNC Symbol;Acc:25127] [ENST00000410076]	TATATTGGTCTGATTTCCCTTAAGGTTTCAGTTGTAGAATTTAAGACTTTCCACTAACGG
A_23_P256956	NM_005733	KIF20A	Hs.718626	10112	hs|5q31.2	GO:0000278(mitotic cell cycle)|GO:0000910(cytokinesis)|GO:0001578(microtubule bundle formation)|GO:0003777(microtubule motor activity)|GO:0005215(transporter activity)|GO:0005524(ATP binding)|GO:0005654(nucleoplasm)|GO:0005794(Golgi apparatus)|GO:0005819(spindle)|GO:0005871(kinesin complex)|GO:0005874(microtubule)|GO:0007018(microtubule-based movement)|GO:0008017(microtubule binding)|GO:0008152(m…	1.65322	2.10875	2.13988	2.1087	2.37027	2.20148	7.19945	7.29018	8.43136	8.8698	7.49426	7.73803	6	6	3.748	4.99e-09		kinesin family member 20A	Homo sapiens kinesin family member 20A (KIF20A), mRNA [NM_005733]	TCAAGCCTTGACCACTTGTGATGACATCTTAATCAAACAGGACCAGACTCTGGCTGAACT
A_23_P411296	NM_005194	CEBPB	Hs.719041	1051	hs|20q13.13	GO:0000790(nuclear chromatin)|GO:0001077(RNA polymerase II core promoter proximal region sequence-specific DNA binding transcription factor activity involved in positive regulation of transcription)|GO:0001892(embryonic placenta development)|GO:0003677(DNA binding)|GO:0003700(sequence-specific DNA binding transcription factor activity)|GO:0003705(RNA polymerase II distal enhancer sequence-specifi…	12.0496	9.51191	9.77207	7.73726	8.62793	9.43459	34.6217	35.6311	38.5002	34.9243	32.4358	36.0593	6	6	3.743	4.29e-07		CCAAT/enhancer binding protein (C/EBP), beta	Homo sapiens CCAAT/enhancer binding protein (C/EBP), beta (CEBPB), transcript variant 1, mRNA [NM_005194]	CACGTGTAACTGTCAGCCGGGCCCTGAGTAATCGCTTAAAGATGTTCCTACGGGCTTGTT
A_23_P258769	NM_002121	HLA-DPB1	Hs.485130	3115	hs|6p21.32	GO:0000139(Golgi membrane)|GO:0005765(lysosomal membrane)|GO:0005886(plasma membrane)|GO:0009986(cell surface)|GO:0010008(endosome membrane)|GO:0012507(ER to Golgi transport vesicle membrane)|GO:0019221(cytokine-mediated signaling pathway)|GO:0019886(antigen processing and presentation of exogenous peptide antigen via MHC class II)|GO:0030658(transport vesicle membrane)|GO:0030666(endocytic vesic…	0.63339	0.401689	0.31047	0.333836	0.364894	0.383367	1.2942	1.45689	1.37487	1.56105	1.60339	1.5434	6	6	3.735	1.71e-05		major histocompatibility complex, class II, DP beta 1	Homo sapiens major histocompatibility complex, class II, DP beta 1 (HLA-DPB1), mRNA [NM_002121]	CATTTGCTGTGTTTCGTTAGCATCTGGCTCCAGGACAGACCTTCAACTTCCAAATTGGAT
A_21_P0000275	NR_002592	SNORD96A		619571	hs|5q35.3		0.648887	0.879536	0.968544	0.836303	0.814579	0.597121	3.132	2.81649	3.71027	2.68905	2.83075	2.4323	6	6	3.73	1.57e-07		small nucleolar RNA, C/D box 96A	Homo sapiens small nucleolar RNA, C/D box 96A (SNORD96A), small nucleolar RNA [NR_002592]	AGATGGCATTGTCAGCCAATCCCCAAGTGGGAGTGAGGACATGTCCTGCAATTCTGAAGG
A_32_P175739	NM_000189	HK2	Hs.591588	3099	hs|2p12	GO:0001678(cellular glucose homeostasis)|GO:0004340(glucokinase activity)|GO:0004396(hexokinase activity)|GO:0005524(ATP binding)|GO:0005536(glucose binding)|GO:0005741(mitochondrial outer membrane)|GO:0005829(cytosol)|GO:0005975(carbohydrate metabolic process)|GO:0006006(glucose metabolic process)|GO:0006096(glycolysis)|GO:0007595(lactation)|GO:0008637(apoptotic mitochondrial changes)|GO:0008645…	2.88717	2.30487	2.42798	2.37675	2.57318	2.80641	9.50557	11.2468	8.58422	9.81962	8.30188	9.94412	6	6	3.728	1.05e-09		hexokinase 2	Homo sapiens hexokinase 2 (HK2), mRNA [NM_000189]	CAATCTTCGGGGTGTGATGAATAGCAAATCATCTCAAATCCTTGAGCACTCAGTCTAGTG
A_32_P1381	M12623	HMGN2	Hs.181163	3151	hs|1p36.11	GO:0000785(chromatin)|GO:0005634(nucleus)|GO:0005737(cytoplasm)|GO:0031492(nucleosomal DNA binding)	10.1799	13.0744	11.2205	11.7719	10.9653	10.6875	36.8564	37.7102	47.3869	45.6367	42.7208	42.8914	6	6	3.725	4.66e-10		high mobility group nucleosomal binding domain 2	Human non-histone chromosomal protein HMG-17 mRNA, complete cds. [M12623]	AGCCTTGTGGTATAGAAAAACAAATTTGTTTTTATGTCCTCGTCTCCCTTTCCCTCTTTC
A_23_P122863	NM_001001555	GRB10	Hs.164060	2887	hs|7p12.1	GO:0005070(SH3/SH2 adaptor activity)|GO:0005158(insulin receptor binding)|GO:0005515(protein binding)|GO:0005737(cytoplasm)|GO:0005829(cytosol)|GO:0005886(plasma membrane)|GO:0008286(insulin receptor signaling pathway)|GO:0030178(negative regulation of Wnt receptor signaling pathway)|GO:0030949(positive regulation of vascular endothelial growth factor receptor signaling pathway)|GO:0032868(respon…	9.07199	5.19387	5.39968	4.26554	5.51002	5.52262	18.6917	19.2283	22.018	23.7304	19.7747	23.4695	6	6	3.717	9.81e-06		growth factor receptor-bound protein 10	Homo sapiens growth factor receptor-bound protein 10 (GRB10), transcript variant 4, mRNA [NM_001001555]	GAAAATAAACTGGAATGATCATCTATGGCTTGGGCCGCTTAGGAACAAGAACCGGAGAGA
A_23_P163099	NM_002692	POLE2	Hs.162777	5427	hs|14q21.3	GO:0000082(G1/S transition of mitotic cell cycle)|GO:0000278(mitotic cell cycle)|GO:0000722(telomere maintenance via recombination)|GO:0000723(telomere maintenance)|GO:0003677(DNA binding)|GO:0003887(DNA-directed DNA polymerase activity)|GO:0005634(nucleus)|GO:0005654(nucleoplasm)|GO:0005730(nucleolus)|GO:0006260(DNA replication)|GO:0006270(DNA-dependent DNA replication initiation)|GO:0006281(DNA…	0.0545206	0.289743	0.385658	0.366054	0.322196	0.180309	0.771242	0.804501	0.903228	0.982852	0.852573	0.709575	5	6	3.702	0.00729		polymerase (DNA directed), epsilon 2, accessory subunit	Homo sapiens polymerase (DNA directed), epsilon 2, accessory subunit (POLE2), transcript variant 1, mRNA [NM_002692]	AAAGATGCTATGTTTGTGTTTTTATCTGATGTTTGGTTGGACCAGGTGGAAGTATTGGAA
A_21_P0011086	ENST00000520314	LOC728715	Hs.524331	728715	hs|12p13.31		0.270122	0.148894	0.137731	0.114651	0.154472	0.214095	0.532249	0.736498	0.609395	0.706525	0.459125	0.69379	6	6	3.699	1.98e-05		ovostatin homolog 2-like	PREDICTED: Homo sapiens ovostatin homolog 2-like (LOC728715), mRNA [XM_006719171]	CCCTAGCTTTTTACAACATCGACAGTAGTTCAGTTTCCGAGTGAGACAAAGCAATTACTA
A_24_P39211	NM_198219	ING1	Hs.46700	3621	hs|13q34	GO:0005515(protein binding)|GO:0005634(nucleus)|GO:0006606(protein import into nucleus)|GO:0007049(cell cycle)|GO:0008270(zinc ion binding)|GO:0008285(negative regulation of cell proliferation)|GO:0010941(regulation of cell death)|GO:0016568(chromatin modification)|GO:0030308(negative regulation of cell growth)|GO:0035064(methylated histone residue binding)|GO:0045893(positive regulation of trans…	0.846414	1.22914	1.15462	0.924435	0.921173	0.960642	3.26951	3.14172	4.19982	4.17007	3.93719	3.45715	6	6	3.682	1.69e-08		inhibitor of growth family, member 1	Homo sapiens inhibitor of growth family, member 1 (ING1), transcript variant 1, mRNA [NM_198219]	GACAACGACGAGTGCCCCATCGAGTGGTTCCACTTCTCGTGCGTGGGGCTCAATCATAAA
A_33_P3283196	XM_006719692	SCAF11		9169	hs|12q12	GO:0000245(spliceosomal complex assembly)|GO:0000375(RNA splicing, via transesterification reactions)|GO:0005515(protein binding)|GO:0005634(nucleus)|GO:0005730(nucleolus)|GO:0006397(mRNA processing)|GO:0008270(zinc ion binding)|GO:0008380(RNA splicing)	0.539189	0.372329	0.496047	0.595649	0.480372	0.542907	1.60459	2.24799	1.83895	1.92979	1.65119	1.80703	6	6	3.676	5.43e-08		SR-related CTD-associated factor 11	PREDICTED: Homo sapiens SR-related CTD-associated factor 11 (SCAF11), transcript variant X3, mRNA [XM_006719692]	GTAACTGTATAGTGACTCTGGCTGAGTTCTCAAAAGAAGGAAGAGAAGATTTGTTATACA
A_23_P357207	NM_138409	MRAP2	Hs.370055	112609	hs|6q14.2	GO:0005783(endoplasmic reticulum)|GO:0005789(endoplasmic reticulum membrane)|GO:0005886(plasma membrane)|GO:0006112(energy reserve metabolic process)|GO:0007631(feeding behavior)|GO:0016021(integral to membrane)|GO:0030819(positive regulation of cAMP biosynthetic process)|GO:0031780(corticotropin hormone receptor binding)|GO:0031781(type 3 melanocortin receptor binding)|GO:0031782(type 4 melanoco…	0.156878	0.155611	0.0512671	0.167087	0.189749	0.195682	0.524394	0.597601	0.283712	0.656398	0.631013	0.519769	4	6	3.675	0.000575		melanocortin 2 receptor accessory protein 2	Homo sapiens melanocortin 2 receptor accessory protein 2 (MRAP2), mRNA [NM_138409]	GTGGCCTGAGTTATGTAAACAAGTGAGCAACACAGCTTTAATTTCATGGAGGAATCAAAG
A_24_P403303	NM_198513	PHF20L1	Hs.304362	51105	hs|8q24.22	GO:0005515(protein binding)|GO:0008270(zinc ion binding)	0.078879	0.183461	0.184014	0.150623	0.150923	0.170487	0.415095	0.544975	0.418318	1.31941	0.421482	0.481027	4	6	3.672	0.000261		PHD finger protein 20-like 1	Homo sapiens PHD finger protein 20-like 1 (PHF20L1), transcript variant 3, mRNA [NM_198513]	AAAGCCGAGTTATAAAGCTCTTAATTACATCTCAATTGGTATCAGCAATAGACCTAAAGG
A_33_P3807062	NM_018410	HJURP	Hs.532968	55355	hs|2q37.1	GO:0000775(chromosome, centromeric region)|GO:0000777(condensed chromosome kinetochore)|GO:0003677(DNA binding)|GO:0005515(protein binding)|GO:0005634(nucleus)|GO:0005654(nucleoplasm)|GO:0005730(nucleolus)|GO:0005737(cytoplasm)|GO:0006334(nucleosome assembly)|GO:0007049(cell cycle)|GO:0007059(chromosome segregation)|GO:0034080(CenH3-containing nucleosome assembly at centromere)|GO:0042393(histone…	4.21062	2.25566	1.80001	1.06825	2.39641	2.78469	8.0908	7.476	7.75533	9.56281	7.23756	9.10582	6	6	3.666	0.000687		Holliday junction recognition protein	Homo sapiens Holliday junction recognition protein (HJURP), transcript variant 1, mRNA [NM_018410]	CATCAGAGATAACCTCGAGTTCTTGGTGTAGAAATTATGTGAATAAAGTTGCTCAATTAG
A_33_P3230254	NM_022346	NCAPG	Hs.567567	64151	hs|4p15.31	GO:0000278(mitotic cell cycle)|GO:0000796(condensin complex)|GO:0005515(protein binding)|GO:0005634(nucleus)|GO:0005737(cytoplasm)|GO:0005813(centrosome)|GO:0005829(cytosol)|GO:0007076(mitotic chromosome condensation)|GO:0015629(actin cytoskeleton)	0.244812	0.150955	0.0905848	0.164611	0.120708	0.116927	0.552646	0.620862	0.336266	0.589129	0.43057	0.645156	4	6	3.666	3.4e-05		non-SMC condensin I complex, subunit G	Homo sapiens non-SMC condensin I complex, subunit G (NCAPG), transcript variant 1, mRNA [NM_022346]	ATGTGGTTTACCATACCAAAGCTTGCTTTCTCTGGCATGGGAAAAATAAATTTAAGCACC
A_24_P182494	NM_007207	DUSP10	Hs.497822	11221	hs|1q41	GO:0000188(inactivation of MAPK activity)|GO:0002819(regulation of adaptive immune response)|GO:0004721(phosphoprotein phosphatase activity)|GO:0004725(protein tyrosine phosphatase activity)|GO:0005634(nucleus)|GO:0005730(nucleolus)|GO:0005737(cytoplasm)|GO:0005794(Golgi apparatus)|GO:0006470(protein dephosphorylation)|GO:0006950(response to stress)|GO:0007254(JNK cascade)|GO:0008138(protein tyro…	0.0443242	0.137739	0.0611448	0.133362	0.079824	0.076972	0.193241	0.337036	0.314767	0.342634	0.289832	0.361914	1	5	3.661	0.000276		dual specificity phosphatase 10	Homo sapiens dual specificity phosphatase 10 (DUSP10), transcript variant 1, mRNA [NM_007207]	GTTCGAGGAAGACCTAAACAACGGTGTGACACCGAGAATCCTTACACCAAAGCTGATGGG
A_23_P122924	NM_002192	INHBA	Hs.583348	3624	hs|7p14.1	GO:0000082(G1/S transition of mitotic cell cycle)|GO:0001541(ovarian follicle development)|GO:0001942(hair follicle development)|GO:0002244(hemopoietic progenitor cell differentiation)|GO:0005125(cytokine activity)|GO:0005179(hormone activity)|GO:0005515(protein binding)|GO:0005576(extracellular region)|GO:0006357(regulation of transcription from RNA polymerase II promoter)|GO:0006952(defense res…	38.8521	21.674	20.4633	21.881	21.5362	23.8231	81.7396	84.9701	92.4194	95.3869	83.1236	91.4575	6	6	3.661	2.05e-05		inhibin, beta A	Homo sapiens inhibin, beta A (INHBA), mRNA [NM_002192]	AAACATCATCAAAAAGGACATTCAGAACATGATCGTGGAGGAGTGTGGGTGCTCATAGAG
A_23_P70249	NM_001790	CDC25C	Hs.656	995	hs|5q31.2	GO:0000079(regulation of cyclin-dependent protein kinase activity)|GO:0000086(G2/M transition of mitotic cell cycle)|GO:0000278(mitotic cell cycle)|GO:0004725(protein tyrosine phosphatase activity)|GO:0005515(protein binding)|GO:0005634(nucleus)|GO:0005654(nucleoplasm)|GO:0005829(cytosol)|GO:0006260(DNA replication)|GO:0007067(mitosis)|GO:0007088(regulation of mitosis)|GO:0007283(spermatogenesis)…	0.524724	0.434447	0.526311	0.441989	0.449937	0.506322	1.69141	1.75131	1.57105	1.94613	1.76082	1.77243	6	6	3.644	2.23e-10		cell division cycle 25C	Homo sapiens cell division cycle 25C (CDC25C), transcript variant 1, mRNA [NM_001790]	CAAACCCAAGATTATTAAAAGATGTCTCTGCAAACCAACAGGCTACCAACTTGTATCCAG
A_23_P253350	NM_020130	C8orf4	Hs.591849	56892	hs|8p11.21	GO:0006915(apoptotic process)	0.877415	1.23775	0.78925	0.920321	0.942426	0.895302	3.46735	3.70515	3.07469	3.51216	3.66468	3.04829	6	6	3.641	9.45e-08		chromosome 8 open reading frame 4	Homo sapiens chromosome 8 open reading frame 4 (C8orf4), mRNA [NM_020130]	TGAAAAAGTGCACCACATGGATGTTAAGTAGAAATTCAAGAAAGTAAGATGTCTTCAGCA
A_23_P40880	NM_178868	CMTM8	Hs.154986	152189	hs|3p22.3	GO:0005125(cytokine activity)|GO:0005615(extracellular space)|GO:0005634(nucleus)|GO:0005737(cytoplasm)|GO:0006935(chemotaxis)|GO:0016021(integral to membrane)	0.345175	1.18598	0.966729	1.3315	0.99822	1.01314	3.48815	3.48834	3.3508	3.73837	2.71268	2.95136	6	6	3.631	0.000952		CKLF-like MARVEL transmembrane domain containing 8	Homo sapiens CKLF-like MARVEL transmembrane domain containing 8 (CMTM8), mRNA [NM_178868]	GCTACGCTGGAAATACATATTTCAGTTTTATAGCATGGAGATCCAGGACCATACAGTGAT
A_32_P74409	NM_001145033	C11orf96	Hs.530443	387763	hs|11p11.2		9.32657	5.24835	5.22774	5.52148	5.76875	6.54598	18.4919	23.9916	24.1784	24.4467	21.8903	21.0801	6	6	3.625	2.97e-06		chromosome 11 open reading frame 96	Homo sapiens chromosome 11 open reading frame 96 (C11orf96), mRNA [NM_001145033]	ATGGCTGAAGGCATTTATTTAACGATCTTTTTACCTGGATATGTCTGTGAGGCTCCTGAA
A_24_P462899	NM_001012507	CENPW	Hs.486401	387103	hs|6q22.32	GO:0000278(mitotic cell cycle)|GO:0000775(chromosome, centromeric region)|GO:0000776(kinetochore)|GO:0000777(condensed chromosome kinetochore)|GO:0003677(DNA binding)|GO:0005515(protein binding)|GO:0005730(nucleolus)|GO:0007059(chromosome segregation)|GO:0007067(mitosis)|GO:0016363(nuclear matrix)|GO:0034080(CenH3-containing nucleosome assembly at centromere)|GO:0046982(protein heterodimerization…	2.58457	1.81023	2.26364	1.86416	2.39999	2.1399	6.29164	8.90867	8.35009	9.40179	7.52274	6.94762	6	6	3.625	3.47e-08		centromere protein W	Homo sapiens centromere protein W (CENPW), transcript variant 2, mRNA [NM_001012507]	GAAGAGCAGAGGTTAGAAGTCAAAGAACATATTCTTGAAAGTTATGATGCATTCTTTTGG
A_33_P3276918	NM_001195228	FAM64A	Hs.592116	54478	hs|17p13.2	GO:0005515(protein binding)|GO:0005634(nucleus)|GO:0005730(nucleolus)|GO:0005737(cytoplasm)|GO:0007067(mitosis)	0.144029	0.641028	0.777266	0.74107	0.795412	0.612055	2.07641	1.85516	2.30375	2.03502	2.05029	1.56609	5	6	3.617	0.00446		family with sequence similarity 64, member A	Homo sapiens family with sequence similarity 64, member A (FAM64A), transcript variant 2, mRNA [NM_001195228]	GAATTCAGCATCTCCAGAAGCTGTCCCAAGAGCTAGATGAAGCCATTATGGCGGAAGAGA
A_23_P82929	NM_002514	NOV	Hs.235935	4856	hs|8q24.12	GO:0001558(regulation of cell growth)|GO:0005520(insulin-like growth factor binding)|GO:0005576(extracellular region)|GO:0008083(growth factor activity)|GO:0010468(regulation of gene expression)|GO:0030424(axon)|GO:0030425(dendrite)|GO:0031012(extracellular matrix)|GO:0043025(neuronal cell body)|GO:0043231(intracellular membrane-bounded organelle)	0.777133	0.495319	0.505255	0.500031	0.560363	0.542979	1.90147	2.2128	1.72823	2.22978	1.88173	2.16425	6	6	3.615	1.83e-07		nephroblastoma overexpressed	Homo sapiens nephroblastoma overexpressed (NOV), mRNA [NM_002514]	TAGGCTGCAAAATTAAATCTAGACATTCTTTTAATGCCACCACACGTGTTCCGCTTCTCT
A_23_P106682	NM_001424	EMP2	Hs.531561	2013	hs|16p13.13	GO:0001954(positive regulation of cell-matrix adhesion)|GO:0005178(integrin binding)|GO:0008283(cell proliferation)|GO:0016021(integral to membrane)|GO:0016324(apical plasma membrane)|GO:2001046(positive regulation of integrin-mediated signaling pathway)	0.725462	0.761277	0.808706	0.763832	0.761184	0.728529	2.9888	2.86762	2.73157	2.75163	2.56846	2.54675	6	6	3.614	3.24e-11		epithelial membrane protein 2	Homo sapiens epithelial membrane protein 2 (EMP2), mRNA [NM_001424]	TTCCGGAGCTGGGTTGCTTCTGCTGCAGTACAGAATCCACATTCAGATAACCATTTTGTA
A_23_P336992	NM_182491	ZFAND2A	Hs.648111	90637	hs|7p22.3	GO:0005634(nucleus)|GO:0005737(cytoplasm)|GO:0008270(zinc ion binding)	4.40087	4.68975	4.4664	5.35262	4.81568	4.42449	17.0971	15.6464	19.5329	21.2607	14.5803	14.4056	6	6	3.612	3.66e-07		zinc finger, AN1-type domain 2A	Homo sapiens zinc finger, AN1-type domain 2A (ZFAND2A), mRNA [NM_182491]	TTTCTGTAAAGATCATTTTCCATACGCTGCACATAAGTGTCCGTTTGCATTCCAGAAGGA
A_33_P3351686	NM_001114938	CCDC17	Hs.18912	149483	hs|1p34.1		0.0614066	0.0701236	0.0223012	0.0409646	0.0755716	0.0474583	0.132599	0.12244	0.171522	0.19956	0.236681	0.237805	0	4	3.611	0.000298		coiled-coil domain containing 17	Homo sapiens coiled-coil domain containing 17 (CCDC17), transcript variant 1, mRNA [NM_001114938]	TGTACAGACACTGGCAGAGATCAATCCAGCAAGTGTCCATGAGTACCAGTACCCACCTCC
A_24_P346855	NM_002417	MKI67	Hs.80976	4288	hs|10q26.2	GO:0000775(chromosome, centromeric region)|GO:0000793(condensed chromosome)|GO:0005515(protein binding)|GO:0005524(ATP binding)|GO:0005634(nucleus)|GO:0005730(nucleolus)|GO:0005737(cytoplasm)|GO:0006259(DNA metabolic process)|GO:0007126(meiosis)|GO:0008022(protein C-terminus binding)|GO:0008283(cell proliferation)|GO:0014070(response to organic cyclic compound)|GO:0030212(hyaluronan metabolic pro…	1.09341	0.817079	0.767401	0.813121	0.921349	0.926651	3.47078	2.72734	3.42647	3.03884	3.38834	3.15253	6	6	3.61	8.33e-09		marker of proliferation Ki-67	Homo sapiens marker of proliferation Ki-67 (MKI67), transcript variant 1, mRNA [NM_002417]	TCTCACCCTGGTAAGTACAGTATTTCAAGAGCACGCTAAGGGTGGTTTTCATTTTACAGG
A_33_P3333337	NM_001164213	LRCH1	Hs.507971	23143	hs|13q14.2		0.0624314	0.153034	0.136159	0.192089	0.149295	0.189151	0.52971	0.522689	0.588373	0.506344	0.576251	0.32752	5	6	3.608	0.000194		leucine-rich repeats and calponin homology (CH) domain containing 1	Homo sapiens leucine-rich repeats and calponin homology (CH) domain containing 1 (LRCH1), transcript variant 3, mRNA [NM_001164213]	GTGGGCATTACCATTCAAGCATTACTAGACATCACCGTAACGAAGGCTCTGTTCACATGA
A_23_P64611	NM_176798	P2RY6	Hs.16362	5031	hs|11q13.4	GO:0004930(G-protein coupled receptor activity)|GO:0005886(plasma membrane)|GO:0005887(integral to plasma membrane)|GO:0007200(phospholipase C-activating G-protein coupled receptor signaling pathway)|GO:0014911(positive regulation of smooth muscle cell migration)|GO:0016323(basolateral plasma membrane)|GO:0016324(apical plasma membrane)|GO:0030321(transepithelial chloride transport)|GO:0035589(G-…	0.0600104	0.089313	0.0419108	0.084565	0.057004	0.0740435	0.232902	0.275609	0.211552	0.24129	0.286419	0.188037	1	4	3.607	1.25e-05		pyrimidinergic receptor P2Y, G-protein coupled, 6	Homo sapiens pyrimidinergic receptor P2Y, G-protein coupled, 6 (P2RY6), transcript variant 2, mRNA [NM_176798]	ATGCGGAGAATTAGAGTTCAGCTCAGCTGGGCATGGAGTTAAGATCCCTCACAGGACCCA
A_33_P3279969	NM_181775	PLXNA4	Hs.511454	91584	hs|7q32.3	GO:0002116(semaphorin receptor complex)|GO:0005622(intracellular)|GO:0005886(plasma membrane)|GO:0007411(axon guidance)|GO:0016021(integral to membrane)|GO:0017154(semaphorin receptor activity)|GO:0021610(facial nerve morphogenesis)|GO:0021615(glossopharyngeal nerve morphogenesis)|GO:0021636(trigeminal nerve morphogenesis)|GO:0021644(vagus nerve morphogenesis)|GO:0021784(postganglionic parasympat…	0.0780136	0.0944622	0.041713	0.073096	0.0321371	0.0742619	0.170473	0.196258	0.235114	0.256208	0.23935	0.241064	2	6	3.598	0.000325		plexin A4	Homo sapiens plexin A4 (PLXNA4), transcript variant 2, mRNA [NM_181775]	TGCATCTTCATCTTGAAGCAGATAAATGACCGCATTAAGGAGCGGCTGCAGTCTTGTTAC
A_33_P3230259	NM_015341	NCAPH	Hs.308045	23397	hs|2q11.2	GO:0000278(mitotic cell cycle)|GO:0000796(condensin complex)|GO:0005515(protein binding)|GO:0005634(nucleus)|GO:0005737(cytoplasm)|GO:0005829(cytosol)|GO:0007076(mitotic chromosome condensation)|GO:0015630(microtubule cytoskeleton)	0.106745	0.0181749	0.0728698	0.0375172	0.0829125	0.0948158	0.170135	0.160961	0.197663	0.274181	0.311062	0.195079	0	5	3.595	0.00437		non-SMC condensin I complex, subunit H	Homo sapiens non-SMC condensin I complex, subunit H (NCAPH), transcript variant 1, mRNA [NM_015341]	AATGGGATTAGTGCTCTTATAAAAGAGGCCTGAGGAAGCTTGTTCGTTCCTCTTGCCCTT
A_23_P122197	NM_031966	CCNB1	Hs.23960	891	hs|5q13.2	GO:0000079(regulation of cyclin-dependent protein kinase activity)|GO:0000082(G1/S transition of mitotic cell cycle)|GO:0000086(G2/M transition of mitotic cell cycle)|GO:0000278(mitotic cell cycle)|GO:0000922(spindle pole)|GO:0000942(condensed nuclear chromosome outer kinetochore)|GO:0001556(oocyte maturation)|GO:0001701(in utero embryonic development)|GO:0001933(negative regulation of protein ph…	8.15285	9.23842	9.55679	10.1835	10.3185	10.2272	31.3838	34.6228	34.2903	40.464	32.3845	33.7379	6	6	3.587	2.65e-10		cyclin B1	Homo sapiens cyclin B1 (CCNB1), mRNA [NM_031966]	GGACACCAACTCTACAACATTACCTGTCATATACTGAAGAATCTCTTCTTCCAGTTATGC
A_23_P118815	NM_001012271	BIRC5	Hs.744872	332	hs|17q25.3	GO:0000086(G2/M transition of mitotic cell cycle)|GO:0000228(nuclear chromosome)|GO:0000278(mitotic cell cycle)|GO:0000775(chromosome, centromeric region)|GO:0000777(condensed chromosome kinetochore)|GO:0000910(cytokinesis)|GO:0004869(cysteine-type endopeptidase inhibitor activity)|GO:0005515(protein binding)|GO:0005634(nucleus)|GO:0005737(cytoplasm)|GO:0005814(centriole)|GO:0005819(spindle)|GO:0…	21.2972	12.3342	12.4839	9.39203	11.861	12.8679	46.511	46.1955	46.1615	47.5839	42.6616	49.2731	6	6	3.581	6.08e-05		baculoviral IAP repeat containing 5	Homo sapiens baculoviral IAP repeat containing 5 (BIRC5), transcript variant 3, mRNA [NM_001012271]	CTGGAAACCTCTGGAGGTCATCTCGGCTGTTCCTGAGAAATAAAAAGCCTGTCATTTCAA
A_24_P66027	NM_004900	APOBEC3B	Hs.226307	9582	hs|22q13.1	GO:0005634(nucleus)|GO:0008152(metabolic process)|GO:0008270(zinc ion binding)|GO:0010529(negative regulation of transposition)|GO:0045087(innate immune response)|GO:0047844(deoxycytidine deaminase activity)|GO:0051607(defense response to virus)	0.505686	0.749311	0.656572	0.681719	0.670402	0.583161	2.33968	2.10865	2.65083	2.28786	2.42221	1.85291	6	6	3.557	1.39e-08		apolipoprotein B mRNA editing enzyme, catalytic polypeptide-like 3B	Homo sapiens apolipoprotein B mRNA editing enzyme, catalytic polypeptide-like 3B (APOBEC3B), transcript variant 1, mRNA [NM_004900]	GCTGCCCGCATCTATGATTACGACCCCCTATATAAGGAGGCGCTGCAAATGCTGCGGGAT
A_23_P160537	NM_024037	AUNIP	Hs.725400	79000	hs|1p36.11	GO:0000922(spindle pole)|GO:0005515(protein binding)|GO:0005737(cytoplasm)|GO:0005813(centrosome)|GO:0007051(spindle organization)	0.47172	0.286498	0.335317	0.306406	0.366433	0.329641	1.14141	1.40831	1.21525	1.3638	0.984694	1.28437	6	6	3.552	1.33e-07		aurora kinase A and ninein interacting protein	Homo sapiens aurora kinase A and ninein interacting protein (AUNIP), transcript variant 2, mRNA [NM_024037]	CTCCCTTAAAAAGCCTGAGCTGTACAACAATCTGGATGTGACTCTGTTACCCTTTTCCCA
A_33_P3462960	NM_006260	DNAJC3	Hs.59214	5611	hs|13q32.1	GO:0004860(protein kinase inhibitor activity)|GO:0005737(cytoplasm)|GO:0005788(endoplasmic reticulum lumen)|GO:0006469(negative regulation of protein kinase activity)|GO:0006987(activation of signaling protein activity involved in unfolded protein response)|GO:0030968(endoplasmic reticulum unfolded protein response)|GO:0031205(endoplasmic reticulum Sec complex)|GO:0044267(cellular protein metabol…	1.17273	0.798804	0.695605	0.674262	0.644571	0.736517	2.59817	2.62707	2.68362	3.16523	2.45574	2.91772	6	6	3.547	5.22e-06		DnaJ (Hsp40) homolog, subfamily C, member 3	Homo sapiens DnaJ (Hsp40) homolog, subfamily C, member 3 (DNAJC3), mRNA [NM_006260]	CCTTCAGCTCAGGCGGACCATTTAGATTTAAATTCCACTTCAATTAAACCAACTGTTTTT
A_33_P3300965	NM_004503	HOXC6	Hs.549040	3223	hs|12q13.13	GO:0003700(sequence-specific DNA binding transcription factor activity)|GO:0003714(transcription corepressor activity)|GO:0005634(nucleus)|GO:0005730(nucleolus)|GO:0005737(cytoplasm)|GO:0006351(transcription, DNA-dependent)|GO:0006357(regulation of transcription from RNA polymerase II promoter)|GO:0007275(multicellular organismal development)|GO:0009952(anterior/posterior pattern specification)|G…	0.245509	0.16597	0.198687	0.103574	0.14916	0.160204	0.54752	0.602109	0.48548	0.710632	0.625419	0.560056	5	6	3.546	2.69e-05		homeobox C6	Homo sapiens homeobox C6 (HOXC6), transcript variant 1, mRNA [NM_004503]	CCTCCTGTATAAATCCAACCTCTGGGTCCGTTCTCGAATATTTAATAAAACTGATATTAT
A_33_P3307903	NM_005192	CDKN3	Hs.84113	1033	hs|14q22.2	GO:0000079(regulation of cyclin-dependent protein kinase activity)|GO:0000082(G1/S transition of mitotic cell cycle)|GO:0004722(protein serine/threonine phosphatase activity)|GO:0004725(protein tyrosine phosphatase activity)|GO:0005515(protein binding)|GO:0005737(cytoplasm)|GO:0007050(cell cycle arrest)|GO:0008138(protein tyrosine/serine/threonine phosphatase activity)|GO:0008285(negative regulat…	0.141872	0.910176	0.711115	0.938456	0.702469	0.736585	1.92276	2.87207	2.98538	1.83678	2.09001	1.39573	5	6	3.544	0.0057		cyclin-dependent kinase inhibitor 3	Homo sapiens cyclin-dependent kinase inhibitor 3 (CDKN3), transcript variant 1, mRNA [NM_005192]	AGTTTGACTCATCAGATGAAGAGCCTATTGAAGATGAACAGACTCCAATTCATATATCAT
A_21_P0012871	XR_427818	LOC100128340		100128340	hs|5q35.3		0.0345173	0.100064	0.0596522	0.0266499	0.114055	0.0943197	0.226495	0.198242	0.169733	0.294494	0.203777	0.254966	0	4	3.542	0.00276		uncharacterized LOC100128340	PREDICTED: Homo sapiens uncharacterized LOC100128340 (RP11-423H2.3), misc_RNA [XR_427818]	GAGGATGGGCTCAAGGACAGCTTGCCTGACTGCAGCCATAAGGATGAAGCCTCTTCAGGT
A_24_P297539	NM_181801	UBE2C	Hs.93002	11065	hs|20q13.12	GO:0000278(mitotic cell cycle)|GO:0004842(ubiquitin-protein ligase activity)|GO:0005515(protein binding)|GO:0005524(ATP binding)|GO:0005654(nucleoplasm)|GO:0005680(anaphase-promoting complex)|GO:0005829(cytosol)|GO:0006511(ubiquitin-dependent protein catabolic process)|GO:0007049(cell cycle)|GO:0007051(spindle organization)|GO:0007094(mitotic cell cycle spindle assembly checkpoint)|GO:0008054(cyc…	18.6779	11.0837	12.5698	9.65485	12.5113	12.9632	41.315	45.0078	43.531	45.0471	43.743	50.4521	6	6	3.542	1.19e-05		ubiquitin-conjugating enzyme E2C	Homo sapiens ubiquitin-conjugating enzyme E2C (UBE2C), transcript variant 4, mRNA [NM_181801]	TTGTCTTTTAAATTAAGCCTCGGTTGAGCCCTTGTATATTAAATAAATGCATTTTTGTCC
A_23_P361419	NM_018369	DEPDC1B	Hs.482233	55789	hs|5q12.1	GO:0005096(GTPase activator activity)|GO:0005829(cytosol)|GO:0007264(small GTPase mediated signal transduction)|GO:0043547(positive regulation of GTPase activity)|GO:0051056(regulation of small GTPase mediated signal transduction)	0.176867	0.362382	0.320097	0.289501	0.337174	0.301763	0.976645	1.264	0.85844	1.13453	1.03082	0.960546	5	6	3.541	7.59e-06		DEP domain containing 1B	Homo sapiens DEP domain containing 1B (DEPDC1B), transcript variant 1, mRNA [NM_018369]	TTATCTCTGTGCTTTCTTTTTCATGGTGTTTATTAAATAATTGTGTATATACATCCTAGC
A_33_P3901921	NM_017915	PARPBP	Hs.330663	55010	hs|12q23.2	GO:0000785(chromatin)|GO:0003677(DNA binding)|GO:0005515(protein binding)|GO:0005634(nucleus)|GO:0005737(cytoplasm)|GO:0006281(DNA repair)|GO:2000042(negative regulation of double-strand break repair via homologous recombination)	0.0335207	0.0668473	0.106075	0.0973824	0.138769	0.11363	0.34022	0.322209	0.32517	0.361375	0.326975	0.17036	2	5	3.539	0.000816		PARP1 binding protein	Homo sapiens PARP1 binding protein (PARPBP), mRNA [NM_017915]	GAATTTACAGTCTCTCTCAGTGATGTTTTATTGACATGGAAATACTTGCTCCATGAGAAA
A_23_P89509	NM_006461	SPAG5	Hs.514033	10615	hs|17q11.2	GO:0000070(mitotic sister chromatid segregation)|GO:0000776(kinetochore)|GO:0000777(condensed chromosome kinetochore)|GO:0000922(spindle pole)|GO:0005515(protein binding)|GO:0005737(cytoplasm)|GO:0005815(microtubule organizing center)|GO:0005876(spindle microtubule)|GO:0007049(cell cycle)|GO:0007051(spindle organization)|GO:0007059(chromosome segregation)|GO:0030496(midbody)|GO:0035371(microtubul…	6.06735	3.70503	3.58247	4.01571	4.55766	4.6703	13.4937	14.7765	15.7913	15.8173	15.5594	17.3506	6	6	3.536	2.15e-06		sperm associated antigen 5	Homo sapiens sperm associated antigen 5 (SPAG5), mRNA [NM_006461]	AGAGGAGAACCTTCGGCGCTCTGACAAGGAGTTAGAAAAACTAGATGACATTGTTCAGCA
A_33_P3291831	NM_018131	CEP55	Hs.14559	55165	hs|10q23.33	GO:0000281(cytokinesis after mitosis)|GO:0005515(protein binding)|GO:0005813(centrosome)|GO:0005814(centriole)|GO:0007067(mitosis)|GO:0030496(midbody)|GO:0032154(cleavage furrow)|GO:0045171(intercellular bridge)|GO:0045184(establishment of protein localization)	0.458685	1.10665	0.699373	1.1389	1.11601	0.867187	2.53578	2.8997	3.15847	3.99082	3.14507	2.62014	6	6	3.535	0.000107		centrosomal protein 55kDa	Homo sapiens centrosomal protein 55kDa (CEP55), transcript variant 1, mRNA [NM_018131]	GACCGTCAACATGTGCAGCATCAATTGCATGTAATTCTTAAGGAGCTCCGAAAAGCAAGA
A_23_P169039	NM_003068	SNAI2	Hs.360174	6591	hs|8q11.21	GO:0000122(negative regulation of transcription from RNA polymerase II promoter)|GO:0000790(nuclear chromatin)|GO:0001078(RNA polymerase II core promoter proximal region sequence-specific DNA binding transcription factor activity involved in negative regulation of transcription)|GO:0001649(osteoblast differentiation)|GO:0001837(epithelial to mesenchymal transition)|GO:0003198(epithelial to mesenc…	0.119664	0.208331	0.203096	0.221649	0.143733	0.157083	0.676678	0.767478	0.58258	0.619812	0.560626	0.468067	5	6	3.532	2.92e-06		snail family zinc finger 2	Homo sapiens snail family zinc finger 2 (SNAI2), mRNA [NM_003068]	AAAGTATTTTTGTTTTGTTTTGTTTTTGCCAATTAACAGTATGTGCCTTGGGGGAGGAGG
A_24_P333716	NM_022459	XPO4	Hs.507452	64328	hs|13q12.11	GO:0005515(protein binding)|GO:0005634(nucleus)|GO:0005730(nucleolus)|GO:0005737(cytoplasm)|GO:0015031(protein transport)|GO:0046827(positive regulation of protein export from nucleus)	0.728327	0.986356	1.3598	1.38702	1.31856	0.738279	3.35467	3.65809	3.30018	4.37968	3.6049	3.9807	6	6	3.528	5.74e-05		exportin 4	Homo sapiens exportin 4 (XPO4), mRNA [NM_022459]	AGGAACTGTCAGATACATACTAGTAGCTAATTTTCCTAGCCTGAAATTATATACTGCATC
A_23_P395075	NM_018433	KDM3A	Hs.557425	55818	hs|2p11.2	GO:0000976(transcription regulatory region sequence-specific DNA binding)|GO:0001047(core promoter binding)|GO:0003700(sequence-specific DNA binding transcription factor activity)|GO:0005506(iron ion binding)|GO:0005634(nucleus)|GO:0005737(cytoplasm)|GO:0006351(transcription, DNA-dependent)|GO:0007290(spermatid nucleus elongation)|GO:0009755(hormone-mediated signaling pathway)|GO:0030521(androgen…	0.284277	0.348193	0.250612	0.497377	0.301098	0.404881	0.822779	0.850113	1.11335	1.58498	1.58766	1.47307	6	6	3.525	1.79e-05		lysine (K)-specific demethylase 3A	Homo sapiens lysine (K)-specific demethylase 3A (KDM3A), transcript variant 1, mRNA [NM_018433]	TCATACCAATCACGAAGATAAATTACAGGGTGAAGAATGTTATCTACCATGCAGTGAAAG
A_23_P13094	NM_002425	MMP10	Hs.2258	4319	hs|11q22.2	GO:0004222(metalloendopeptidase activity)|GO:0005509(calcium ion binding)|GO:0005576(extracellular region)|GO:0005578(proteinaceous extracellular matrix)|GO:0005615(extracellular space)|GO:0006508(proteolysis)|GO:0008270(zinc ion binding)|GO:0022617(extracellular matrix disassembly)|GO:0030198(extracellular matrix organization)|GO:0030334(regulation of cell migration)|GO:0030574(collagen cataboli…	3.02001	2.17253	2.096	2.40802	2.41954	2.19115	7.43202	9.7037	8.92035	8.51216	6.34268	9.5689	6	6	3.517	7.38e-08		matrix metallopeptidase 10 (stromelysin 2)	Homo sapiens matrix metallopeptidase 10 (stromelysin 2) (MMP10), mRNA [NM_002425]	ATGTATTATGAGCCAAAATGGTTAATTTTTCCTGCATGTTCTGTGACTGAAGAAGATGAG
A_23_P130182	NM_004217	AURKB	Hs.442658	9212	hs|17p13.1	GO:0000122(negative regulation of transcription from RNA polymerase II promoter)|GO:0000278(mitotic cell cycle)|GO:0000779(condensed chromosome, centromeric region)|GO:0000780(condensed nuclear chromosome, centromeric region)|GO:0002903(negative regulation of B cell apoptotic process)|GO:0004674(protein serine/threonine kinase activity)|GO:0004712(protein serine/threonine/tyrosine kinase activity…	1.06565	2.3406	2.8023	2.40264	2.30102	2.19962	7.73221	5.91692	9.3565	7.31287	7.50031	6.65686	6	6	3.5	8.2e-05		aurora kinase B	Homo sapiens aurora kinase B (AURKB), transcript variant 1, mRNA [NM_004217]	AATAGCAGTGGGACACCCGACATCTTAACGCGGCACTTCACAATTGATGACTTTGAGATT
A_23_P381714	NM_198584	CA13	Hs.127189	377677	hs|8q21.2	GO:0004089(carbonate dehydratase activity)|GO:0005829(cytosol)|GO:0006730(one-carbon metabolic process)|GO:0008270(zinc ion binding)|GO:0015701(bicarbonate transport)|GO:0044281(small molecule metabolic process)	0.337307	0.246118	0.217466	0.285753	0.26131	0.36288	0.697068	1.22261	0.763131	1.11037	0.794429	1.53376	6	6	3.487	2.54e-05		carbonic anhydrase XIII	Homo sapiens carbonic anhydrase XIII (CA13), mRNA [NM_198584]	ATTACTGTCTGTGAGAGTTACTACTTTGTAACTTATGGTTTCTGCTTCAGTATTGTGTTG
A_33_P3292540	NM_078626	CDKN2C	Hs.525324	1031	hs|1p32.3	GO:0000079(regulation of cyclin-dependent protein kinase activity)|GO:0000082(G1/S transition of mitotic cell cycle)|GO:0000278(mitotic cell cycle)|GO:0004861(cyclin-dependent protein kinase inhibitor activity)|GO:0005515(protein binding)|GO:0005634(nucleus)|GO:0005737(cytoplasm)|GO:0005829(cytosol)|GO:0007050(cell cycle arrest)|GO:0008285(negative regulation of cell proliferation)|GO:0019901(pro…	1.01653	1.23803	1.17745	1.15048	1.2537	1.28469	3.98622	4.96546	4.23974	4.03142	3.40902	4.27065	6	6	3.486	7.91e-09		cyclin-dependent kinase inhibitor 2C (p18, inhibits CDK4)	Homo sapiens cyclin-dependent kinase inhibitor 2C (p18, inhibits CDK4) (CDKN2C), transcript variant 2, mRNA [NM_078626]	CGTTGCCTCTACTTTATCAATTAACTGAGTAGCTCTCCTGACTTTTAATGTCATTTGTTA
A_23_P54846	NM_014685	HERPUD1	Hs.146393	9709	hs|16q13	GO:0003674(molecular_function)|GO:0005789(endoplasmic reticulum membrane)|GO:0006511(ubiquitin-dependent protein catabolic process)|GO:0006874(cellular calcium ion homeostasis)|GO:0006986(response to unfolded protein)|GO:0006987(activation of signaling protein activity involved in unfolded protein response)|GO:0016021(integral to membrane)|GO:0030968(endoplasmic reticulum unfolded protein respons…	39.8929	22.6119	21.229	21.3354	24.0179	22.7981	81.4646	91.2809	88.1567	90.0095	75.3871	90.1371	6	6	3.485	1.95e-05		homocysteine-inducible, endoplasmic reticulum stress-inducible, ubiquitin-like domain member 1	Homo sapiens homocysteine-inducible, endoplasmic reticulum stress-inducible, ubiquitin-like domain member 1 (HERPUD1), transcript variant 1, mRNA [NM_014685]	TGCAGTGCTTTACTTTAAACTAAGGGGAACTTTGCGGAGGTGAAAACCTTTGCTGGGTTT
A_23_P110430	NM_002448	MSX1	Hs.424414	4487	hs|4p16.2	GO:0000122(negative regulation of transcription from RNA polymerase II promoter)|GO:0000902(cell morphogenesis)|GO:0000982(RNA polymerase II core promoter proximal region sequence-specific DNA binding transcription factor activity)|GO:0001228(RNA polymerase II transcription regulatory region sequence-specific DNA binding transcription factor activity involved in positive regulation of transcripti…	0.335491	0.315878	0.308265	0.277247	0.190783	0.288781	0.869456	0.937487	1.09544	1.04292	0.907509	1.04215	6	6	3.476	2.61e-06		msh homeobox 1	Homo sapiens msh homeobox 1 (MSX1), mRNA [NM_002448]	AAGTGGCTGGAAGAGTCCCTTAGTACTCTTCTAGCATTTAGATCTACACTCTCGAGTTAA
A_23_P323685	NM_003543	HIST1H4H	Hs.591790	8365	hs|6p22.2		0.20959	0.166453	0.164373	0.0991541	0.159008	0.177718	0.451999	0.55678	0.553739	0.663245	0.570832	0.522905	4	6	3.46	8.93e-06		histone cluster 1, H4h	Homo sapiens histone cluster 1, H4h (HIST1H4H), mRNA [NM_003543]	GTTCTGAAGGTGTTCCTGGAGAACGTGATTCGTGACGCTGTCACTTACACAGAGCACGCC
A_23_P82775	NM_022454	SOX17	Hs.98367	64321	hs|8q11.23	GO:0000122(negative regulation of transcription from RNA polymerase II promoter)|GO:0001525(angiogenesis)|GO:0001570(vasculogenesis)|GO:0001706(endoderm formation)|GO:0001828(inner cell mass cellular morphogenesis)|GO:0001947(heart looping)|GO:0003142(cardiogenic plate morphogenesis)|GO:0003143(embryonic heart tube morphogenesis)|GO:0003151(outflow tract morphogenesis)|GO:0003308(negative regulat…	29.5681	15.2465	15.2008	16.786	17.9607	19.3148	54.4632	61.5501	62.4485	73.9762	62.1668	70.8159	6	6	3.458	1.14e-05		SRY (sex determining region Y)-box 17	Homo sapiens SRY (sex determining region Y)-box 17 (SOX17), mRNA [NM_022454]	ACCCTATTTCCAAGTTCAAGTTAACTAGCTTTGAATGTGTCCCAAAACAGCTTCCTCCAT
A_23_P314755	NM_003155	STC1	Hs.25590	6781	hs|8p21.2	GO:0001503(ossification)|GO:0005179(hormone activity)|GO:0005615(extracellular space)|GO:0005737(cytoplasm)|GO:0006874(cellular calcium ion homeostasis)|GO:0007166(cell surface receptor signaling pathway)|GO:0007267(cell-cell signaling)|GO:0007566(embryo implantation)|GO:0007584(response to nutrient)|GO:0016324(apical plasma membrane)|GO:0033280(response to vitamin D)|GO:0046697(decidualization)|…	0.265341	0.787913	0.613099	0.583343	0.647588	0.600358	1.6248	2.16745	1.97974	1.824	2.1064	1.85516	6	6	3.458	0.000287		stanniocalcin 1	Homo sapiens stanniocalcin 1 (STC1), mRNA [NM_003155]	AGGCTGACTTCTCTGAATCAGAAAAGCTATTAAAGTTTGTGTGTTGTGTCCATTTTGCAA
A_33_P3659876	NM_001281932	NCAPG2	Hs.18616	54892	hs|7q36.3	GO:0000278(mitotic cell cycle)|GO:0001833(inner cell mass cell proliferation)|GO:0005515(protein binding)|GO:0005634(nucleus)|GO:0005654(nucleoplasm)|GO:0005730(nucleolus)|GO:0007067(mitosis)|GO:0030261(chromosome condensation)|GO:0035064(methylated histone residue binding)	0.36086	0.270544	0.205812	0.289715	0.181502	0.257504	0.823857	1.04723	0.983602	0.677531	0.798131	1.00438	6	6	3.453	3.48e-06		non-SMC condensin II complex, subunit G2	Homo sapiens non-SMC condensin II complex, subunit G2 (NCAPG2), transcript variant 2, mRNA [NM_001281932]	CACTGTTCACAGAAAACTAAAGACATTCATGGAAATTACTTTGGAAGAGGATAGCATTGA
A_23_P433791	NM_001010984	SPRTN	Hs.554892	83932	hs|1q42.2	GO:0003677(DNA binding)|GO:0005515(protein binding)|GO:0005634(nucleus)|GO:0005694(chromosome)|GO:0005730(nucleolus)|GO:0006974(response to DNA damage stimulus)|GO:0009411(response to UV)|GO:0016607(nuclear speck)|GO:0019985(translesion synthesis)|GO:0031398(positive regulation of protein ubiquitination)|GO:0043130(ubiquitin binding)|GO:0046872(metal ion binding)|GO:0070530(K63-linked polyubiquit…	0.0724852	0.563498	0.538398	0.788849	0.52729	0.374357	1.28591	1.58312	1.41344	1.62764	1.37329	0.902377	5	6	3.453	0.0153		SprT-like N-terminal domain	Homo sapiens SprT-like N-terminal domain (SPRTN), transcript variant 2, mRNA [NM_001010984]	ACGCATATAAGATTGTAATTTTAAGATGTTTTGTGTCTCAGGGTGCTACATTCACTCTTG
A_23_P253524	NM_001813	CENPE	Hs.75573	1062	hs|4q24	GO:0000089(mitotic metaphase)|GO:0000278(mitotic cell cycle)|GO:0000775(chromosome, centromeric region)|GO:0000776(kinetochore)|GO:0000778(condensed nuclear chromosome kinetochore)|GO:0000779(condensed chromosome, centromeric region)|GO:0000940(condensed chromosome outer kinetochore)|GO:0003777(microtubule motor activity)|GO:0005515(protein binding)|GO:0005524(ATP binding)|GO:0005634(nucleus)|GO:…	2.42638	1.88858	1.97692	1.6061	2.03613	2.03297	6.14345	6.86672	6.76281	8.6244	5.85427	7.05901	6	6	3.451	1.86e-08		centromere protein E, 312kDa	Homo sapiens centromere protein E, 312kDa (CENPE), transcript variant 1, mRNA [NM_001813]	CTGAGTGCAAAACTCAGTAGACTCCTCTTTGTCACTTCTCTGGAGATCCAGCATTCCTTA
A_32_P4018	NM_005012	ROR1	Hs.128753	4919	hs|1p31.3	GO:0004714(transmembrane receptor protein tyrosine kinase activity)|GO:0005515(protein binding)|GO:0005524(ATP binding)|GO:0005737(cytoplasm)|GO:0005886(plasma membrane)|GO:0005887(integral to plasma membrane)|GO:0007169(transmembrane receptor protein tyrosine kinase signaling pathway)|GO:0017147(Wnt-protein binding)|GO:0018108(peptidyl-tyrosine phosphorylation)|GO:0043235(receptor complex)	1.45684	1.00929	1.09158	1.18005	1.22986	1.13215	3.55378	5.67995	3.74884	2.87724	4.2693	4.74536	6	6	3.445	5.26e-06		receptor tyrosine kinase-like orphan receptor 1	Homo sapiens receptor tyrosine kinase-like orphan receptor 1 (ROR1), transcript variant 1, mRNA [NM_005012]	TTCAGATCTTTTTCTCCTTTTTTGCACAAAACTATGCTTATGGTTTGTGTCACAGAAGTG
A_33_P3237110	NM_001099652	GPR137C	Hs.416214	283554	hs|14q22.1	GO:0016021(integral to membrane)	0.0510737	0.0680131	0.0640482	0.135727	0.117669	0.15137	0.311482	0.280131	0.335997	0.415064	0.316257	0.232836	2	5	3.443	0.00054		G protein-coupled receptor 137C	Homo sapiens G protein-coupled receptor 137C (GPR137C), mRNA [NM_001099652]	CTCAGCTATATAATCAGTTTCAAACTGGTTGTAAAAGTATAGCTGTGGCCAATGAATGTA
A_23_P315789	NM_000538	RFXAP	Hs.24422	5994	hs|13q13.3	GO:0003677(DNA binding)|GO:0003700(sequence-specific DNA binding transcription factor activity)|GO:0003713(transcription coactivator activity)|GO:0005634(nucleus)|GO:0045893(positive regulation of transcription, DNA-dependent)	0.0954453	0.37951	0.474815	0.601546	0.503015	0.440593	0.904499	1.41539	1.22695	1.61817	1.2829	1.17136	5	6	3.443	0.00526		regulatory factor X-associated protein	Homo sapiens regulatory factor X-associated protein (RFXAP), mRNA [NM_000538]	TATCTGTGAATTTAGGATGTGCATCTCTTTTCAGAGGTGTGTTAGTAAAACCTGACGGAT
A_33_P3287815	NM_001256910	DDX21	Hs.223141	9188	hs|10q22.1	GO:0001649(osteoblast differentiation)|GO:0003725(double-stranded RNA binding)|GO:0004004(ATP-dependent RNA helicase activity)|GO:0005524(ATP binding)|GO:0005634(nucleus)|GO:0005730(nucleolus)|GO:0006200(ATP catabolic process)|GO:0009615(response to virus)|GO:0016020(membrane)|GO:0043330(response to exogenous dsRNA)	2.83853	7.5443	7.59922	10.2663	7.49156	6.04334	23.5044	24.6292	22.898	22.6727	22.3627	18.6709	6	6	3.441	0.000772		DEAD (Asp-Glu-Ala-Asp) box helicase 21	Homo sapiens DEAD (Asp-Glu-Ala-Asp) box helicase 21 (DDX21), transcript variant 2, mRNA [NM_001256910]	GGTCTCAGAATTCTCTTGGCTTTTATTCCTTGATCCACTTGCCAGTTTTATCACTTTACC
A_23_P431252	NM_032505	KBTBD8	Hs.116665	84541	hs|3p14.1	GO:0005794(Golgi apparatus)|GO:0005819(spindle)	0.0288066	0.154482	0.135075	0.15933	0.155156	0.0824229	0.422288	0.387976	0.347812	0.377242	0.255033	0.36672	4	6	3.435	0.00554		kelch repeat and BTB (POZ) domain containing 8	Homo sapiens kelch repeat and BTB (POZ) domain containing 8 (KBTBD8), mRNA [NM_032505]	AAGTAAAAGGCACAATGGGTACTACAGAATTAAAATGTAGGTCTAACATAATGCCAGTTC
A_23_P98022	NM_012238	SIRT1	Hs.369779	23411	hs|10q21.3	GO:0000012(single strand break repair)|GO:0000122(negative regulation of transcription from RNA polymerase II promoter)|GO:0000183(chromatin silencing at rDNA)|GO:0000720(pyrimidine dimer repair by nucleotide-excision repair)|GO:0000731(DNA synthesis involved in DNA repair)|GO:0000790(nuclear chromatin)|GO:0001525(angiogenesis)|GO:0001542(ovulation from ovarian follicle)|GO:0001678(cellular gluco…	0.630736	0.872478	1.18542	1.18143	0.924182	0.90869	2.90165	3.31463	3.32325	3.73175	3.25634	2.70105	6	6	3.427	5.92e-06		sirtuin 1	Homo sapiens sirtuin 1 (SIRT1), transcript variant 1, mRNA [NM_012238]	CTGCCTTAAAACTAGAGATCAACTTTCTCAGCTGCAAAAGCTTCTAGTCTTTCAAGAAGT
A_24_P322771	NM_003225	TFF1	Hs.162807	7031	hs|21q22.3	GO:0005515(protein binding)|GO:0005615(extracellular space)|GO:0005975(carbohydrate metabolic process)|GO:0007586(digestion)|GO:0008083(growth factor activity)|GO:0008285(negative regulation of cell proliferation)|GO:0010039(response to iron ion)|GO:0030154(cell differentiation)|GO:0030277(maintenance of gastrointestinal epithelium)|GO:0032355(response to estradiol stimulus)|GO:0043434(response t…	0.117359	0.128053	0.0494424	0.0826829	0.104386	0.0631369	0.297359	0.2765	0.228408	0.386059	0.320263	0.282392	2	6	3.427	0.000151		trefoil factor 1	Homo sapiens trefoil factor 1 (TFF1), mRNA [NM_003225]	CCCCGTGAAAGACAGAATTGTGGTTTTCCTGGTGTCACGCCCTCCCAGTGTGCAAATAAG
A_33_P3277447	NM_000112	SLC26A2	Hs.302738	1836	hs|5q32	GO:0001503(ossification)|GO:0005886(plasma membrane)|GO:0005887(integral to plasma membrane)|GO:0005975(carbohydrate metabolic process)|GO:0006805(xenobiotic metabolic process)|GO:0006811(ion transport)|GO:0008271(secondary active sulfate transmembrane transporter activity)|GO:0008272(sulfate transport)|GO:0015116(sulfate transmembrane transporter activity)|GO:0016020(membrane)|GO:0030203(glycosa…	6.77875	3.92125	3.92403	3.67274	4.07743	5.4354	14.3358	16.9645	15.0822	14.4551	13.8505	18.4568	6	6	3.419	8.94e-06		solute carrier family 26 (anion exchanger), member 2	Homo sapiens solute carrier family 26 (anion exchanger), member 2 (SLC26A2), mRNA [NM_000112]	GGGGGAGTTGGTTAATAGCAGATACTTTTCTTCTAGAAGCTTATGTTTTATGCTGTTTAT
A_23_P85209	NM_000640	IL13RA2	Hs.336046	3598	hs|Xq23	GO:0004871(signal transducer activity)|GO:0004896(cytokine receptor activity)|GO:0005615(extracellular space)|GO:0007165(signal transduction)|GO:0016021(integral to membrane)|GO:0019221(cytokine-mediated signaling pathway)	0.127607	0.0958737	0.0566742	0.0881624	0.0824133	0.0229736	0.187757	0.261152	0.18103	0.227099	0.315816	0.289551	1	6	3.417	0.00293		interleukin 13 receptor, alpha 2	Homo sapiens interleukin 13 receptor, alpha 2 (IL13RA2), mRNA [NM_000640]	ATACATGAAGACTTTCCATATCAAGAGACATGGTATTGACTCAACAGTTTCCAGTCATGG
A_23_P17345	NM_005461	MAFB	Hs.169487	9935	hs|20q12	GO:0003700(sequence-specific DNA binding transcription factor activity)|GO:0005515(protein binding)|GO:0005634(nucleus)|GO:0005667(transcription factor complex)|GO:0006351(transcription, DNA-dependent)|GO:0007379(segment specification)|GO:0007423(sensory organ development)|GO:0007585(respiratory gaseous exchange)|GO:0008134(transcription factor binding)|GO:0021571(rhombomere 5 development)|GO:002…	1.76698	1.80345	1.69715	1.65416	1.62178	1.66567	5.18082	5.37981	6.08615	7.10467	5.5834	5.66971	6	6	3.412	1.55e-07		v-maf avian musculoaponeurotic fibrosarcoma oncogene homolog B	Homo sapiens v-maf avian musculoaponeurotic fibrosarcoma oncogene homolog B (MAFB), mRNA [NM_005461]	ATTTTTAAGTTCCCATTTGAAATTGCTGGCGCTGCTGGCCGGATGCATTTTTGAGTTTGT
A_23_P118174	NM_005030	PLK1	Hs.592049	5347	hs|16p12.2	GO:0000070(mitotic sister chromatid segregation)|GO:0000086(G2/M transition of mitotic cell cycle)|GO:0000122(negative regulation of transcription from RNA polymerase II promoter)|GO:0000278(mitotic cell cycle)|GO:0000281(cytokinesis after mitosis)|GO:0000776(kinetochore)|GO:0000910(cytokinesis)|GO:0000922(spindle pole)|GO:0000942(condensed nuclear chromosome outer kinetochore)|GO:0001578(microtu…	4.7399	5.47603	6.30528	5.94882	6.0244	5.24568	18.452	15.8169	20.694	21.1632	19.586	19.3848	6	6	3.412	1.9e-09		polo-like kinase 1	Homo sapiens polo-like kinase 1 (PLK1), mRNA [NM_005030]	CGGCAGCGTGCAGATCAACTTCTTCCAGGATCACACCAAGCTCATCTTGTGCCCACTGAT
A_33_P3233659	NM_001104546	RPP30	Hs.139120	10556	hs|10q23.31	GO:0004526(ribonuclease P activity)|GO:0005634(nucleus)|GO:0005655(nucleolar ribonuclease P complex)|GO:0008033(tRNA processing)	0.9066	0.790817	0.85024	0.599738	0.634205	0.703512	2.70554	2.68989	2.82803	2.28046	2.20796	2.47886	6	6	3.411	2.03e-07		ribonuclease P/MRP 30kDa subunit	Homo sapiens ribonuclease P/MRP 30kDa subunit (RPP30), transcript variant 1, mRNA [NM_001104546]	GTGCCTGTTTCCTGTCTCGCTCATGTCACATTTTGGTAATTTTCACAATATTAAAAACTT
A_24_P73389	NM_001032296	STK24	Hs.508514	8428	hs|13q32.2	GO:0004672(protein kinase activity)|GO:0004674(protein serine/threonine kinase activity)|GO:0004702(receptor signaling protein serine/threonine kinase activity)|GO:0005515(protein binding)|GO:0005524(ATP binding)|GO:0005634(nucleus)|GO:0005654(nucleoplasm)|GO:0005730(nucleolus)|GO:0005737(cytoplasm)|GO:0005829(cytosol)|GO:0006468(protein phosphorylation)|GO:0006915(apoptotic process)|GO:0006921(c…	0.521636	1.41704	1.1644	1.90352	1.32131	1.13462	3.86163	3.77314	4.97241	4.34886	4.07805	2.96316	6	6	3.402	0.000476		serine/threonine kinase 24	Homo sapiens serine/threonine kinase 24 (STK24), transcript variant 2, mRNA [NM_001032296]	GGACTGGATCTTCACAATCCGAGAAAAAGATCCCAAGAATCTCGAGAATGGAGCTCTTCA
A_33_P3833211	NM_001080449	DNA2	Hs.532446	1763	hs|10q21.3	GO:0000076(DNA replication checkpoint)|GO:0000278(mitotic cell cycle)|GO:0000722(telomere maintenance via recombination)|GO:0000723(telomere maintenance)|GO:0000729(DNA double-strand break processing)|GO:0000737(DNA catabolic process, endonucleolytic)|GO:0003677(DNA binding)|GO:0003678(DNA helicase activity)|GO:0004386(helicase activity)|GO:0004518(nuclease activity)|GO:0005515(protein binding)|G…	0.0562423	0.290864	0.245294	0.288205	0.173852	0.270301	0.649366	0.619097	0.657857	0.706563	0.696652	0.635792	5	6	3.392	0.00526		DNA replication helicase/nuclease 2	Homo sapiens DNA replication helicase/nuclease 2 (DNA2), transcript variant 1, mRNA [NM_001080449]	AAGAGAATAAAACACTATTTCCCTTGCCTTTTCATACTAGGGCAGTATCTCCTCTAGCTA
A_23_P356616	NM_145804	ABTB2	Hs.23361	25841	hs|11p13	GO:0003674(molecular_function)|GO:0005575(cellular_component)|GO:0005634(nucleus)|GO:0005730(nucleolus)|GO:0046982(protein heterodimerization activity)	0.212008	0.0546051	0.0887451	0.0988933	0.109777	0.181571	0.315922	0.346834	0.442263	0.441846	0.389257	0.367515	3	6	3.388	0.00132		ankyrin repeat and BTB (POZ) domain containing 2	Homo sapiens ankyrin repeat and BTB (POZ) domain containing 2 (ABTB2), mRNA [NM_145804]	TTCTTCAGCTGTCTGGCCGCACCTTAAAAACTATTTATTCACCAAAAGCCCCAGGCATTT
A_21_P0000488	NR_004379	SNORD96B		692226	hs|Xq23		0.149549	0.150945	0.314291	0.236775	0.18874	0.235897	0.697234	0.699153	1.03963	0.723869	0.666114	0.457193	5	6	3.381	1.89e-05		small nucleolar RNA, C/D box 96B	Homo sapiens small nucleolar RNA, C/D box 96B (SNORD96B), small nucleolar RNA [NR_004379]	AGACGACATTGTCAGCCAATCCCCATGTGGTAGTGAGGACATGTCCTGCAGTTCTGAAGG
A_24_P274814	NM_030984	TBXAS1	Hs.520757	6916	hs|7q34	GO:0004497(monooxygenase activity)|GO:0004796(thromboxane-A synthase activity)|GO:0005506(iron ion binding)|GO:0005789(endoplasmic reticulum membrane)|GO:0006690(icosanoid metabolic process)|GO:0006805(xenobiotic metabolic process)|GO:0016021(integral to membrane)|GO:0016705(oxidoreductase activity, acting on paired donors, with incorporation or reduction of molecular oxygen)|GO:0019369(arachidon…	0.160665	0.175726	0.155356	0.0880814	0.145894	0.200804	0.456503	0.446308	0.477144	0.610441	0.514801	0.541453	6	6	3.369	3.48e-05		thromboxane A synthase 1 (platelet)	Homo sapiens thromboxane A synthase 1 (platelet) (TBXAS1), transcript variant 2, mRNA [NM_030984]	CTGCCCTATCTGGACATGGTGATTGCAGAGACGCTGAGGATGTACCCGCCAGCTTTCAGA
A_23_P84910	NM_003446	ZNF157	Hs.89897	7712	hs|Xp11.23	GO:0000122(negative regulation of transcription from RNA polymerase II promoter)|GO:0003677(DNA binding)|GO:0003700(sequence-specific DNA binding transcription factor activity)|GO:0005634(nucleus)|GO:0006351(transcription, DNA-dependent)|GO:0006355(regulation of transcription, DNA-dependent)|GO:0046872(metal ion binding)	0.23373	0.315192	0.340155	0.345269	0.221491	0.270081	0.828583	0.743256	1.01882	1.03678	1.08414	1.07157	6	6	3.368	4.16e-07		zinc finger protein 157	Homo sapiens zinc finger protein 157 (ZNF157), mRNA [NM_003446]	GTTGTACAATGAAGAAAGCCTCTCACTGAAGACTTCCCTCACCATTGGATCAAGCTCCTT
A_23_P62840	NM_024640	YRDC	Hs.301564	79693	hs|1p34.3	GO:0003725(double-stranded RNA binding)|GO:0005739(mitochondrion)|GO:0016020(membrane)|GO:0051051(negative regulation of transport)	5.8191	6.88805	6.94577	6.57288	6.26672	5.55384	18.2083	20.785	22.3144	25.7663	19.8058	21.212	6	6	3.359	4.96e-09		yrdC N(6)-threonylcarbamoyltransferase domain containing	Homo sapiens yrdC N(6)-threonylcarbamoyltransferase domain containing (YRDC), mRNA [NM_024640]	AGTCTTTTTGGTGTAATAGTGGGATGTCTGCTTAGTTGGCAGGGGTTCAGTCCAAATGGA
A_23_P165840	NM_002539	ODC1	Hs.467701	4953	hs|2p25.1	GO:0001822(kidney development)|GO:0004586(ornithine decarboxylase activity)|GO:0005575(cellular_component)|GO:0005829(cytosol)|GO:0006521(regulation of cellular amino acid metabolic process)|GO:0006595(polyamine metabolic process)|GO:0008284(positive regulation of cell proliferation)|GO:0009615(response to virus)|GO:0033387(putrescine biosynthetic process from ornithine)|GO:0034641(cellular nitro…	19.2623	13.3987	13.5072	13.4406	14.5072	14.3113	41.4499	45.5329	50.3351	57.9003	48.4875	51.7324	6	6	3.352	2.34e-08		ornithine decarboxylase 1	Homo sapiens ornithine decarboxylase 1 (ODC1), transcript variant 1, mRNA [NM_002539]	AGCACTCTGGTAGCTGTTAACTGCAAGTTTAGCTTGAATTAAGGGATTTGGGGGGACCAT
A_23_P139919	NM_018413	CHST11	Hs.17569	50515	hs|12q23.3	GO:0000139(Golgi membrane)|GO:0001537(N-acetylgalactosamine 4-O-sulfotransferase activity)|GO:0002063(chondrocyte development)|GO:0005975(carbohydrate metabolic process)|GO:0007585(respiratory gaseous exchange)|GO:0009791(post-embryonic development)|GO:0016021(integral to membrane)|GO:0016051(carbohydrate biosynthetic process)|GO:0030203(glycosaminoglycan metabolic process)|GO:0030204(chondroitin…	1.94772	1.12806	1.14897	1.3539	1.02273	1.43494	3.49757	5.05025	3.25286	5.28869	5.0363	4.60477	6	6	3.347	2.74e-06		carbohydrate (chondroitin 4) sulfotransferase 11	Homo sapiens carbohydrate (chondroitin 4) sulfotransferase 11 (CHST11), transcript variant 1, mRNA [NM_018413]	AGTCTACAAACTCGATTTTTTAATGTTCAATTACTCAGTGCCAAGCTACCTGAAATTGGA
A_24_P113144	NM_024857	ATAD5	Hs.528902	79915	hs|17q11.2	GO:0005524(ATP binding)|GO:0005634(nucleus)|GO:0006974(response to DNA damage stimulus)|GO:0008152(metabolic process)|GO:0017111(nucleoside-triphosphatase activity)	0.185607	0.11592	0.212763	0.156674	0.0865543	0.108205	0.41426	0.362855	0.537556	0.490627	0.470093	0.497625	3	6	3.337	0.00013		ATPase family, AAA domain containing 5	Homo sapiens ATPase family, AAA domain containing 5 (ATAD5), mRNA [NM_024857]	AGGATATCAGTCATTAAAAGTGTATTTTCGAGTCGATCTCTTCTCTATGTGGGTAATAGA
A_23_P42684	XR_108766	FLJ20712	Hs.272195	55025	hs|7p14.3		0.199356	0.0697737	0.117644	0.15561	0.140524	0.176882	0.421783	0.57132	0.412624	0.33997	0.509179	0.504178	2	6	3.333	0.000162		uncharacterized FLJ20712	PREDICTED: Homo sapiens uncharacterized FLJ20712 (FLJ20712), misc_RNA [XR_108766]	GGTCTCCTGTCTAAAATGAGGTGATAATAGCTTCTTGAAGGTTGTAAGGCCCCAAACATG
A_23_P137139	NM_000061	BTK	Hs.159494	695	hs|Xq22.1	GO:0000302(response to reactive oxygen species)|GO:0002224(toll-like receptor signaling pathway)|GO:0002250(adaptive immune response)|GO:0002553(histamine secretion by mast cell)|GO:0002721(regulation of B cell cytokine production)|GO:0002755(MyD88-dependent toll-like receptor signaling pathway)|GO:0002902(regulation of B cell apoptotic process)|GO:0004713(protein tyrosine kinase activity)|GO:000…	0.0757471	0.06139	0.0543778	0.0727447	0.17395	0.10484	0.301733	0.20565	0.369213	0.300512	0.276898	0.239757	3	6	3.33	0.000375		Bruton agammaglobulinemia tyrosine kinase	Homo sapiens Bruton agammaglobulinemia tyrosine kinase (BTK), transcript variant 1, mRNA [NM_000061]	CGGAAGTCCTGATGTATAGCAAGTTCAGCAGCAAATCTGACATTTGGGCTTTTGGGGTTT
A_21_P0000129	NM_001195430	DCLK1	Hs.507755	9201	hs|13q13.3	GO:0001764(neuron migration)|GO:0004672(protein kinase activity)|GO:0004674(protein serine/threonine kinase activity)|GO:0005057(receptor signaling protein activity)|GO:0005524(ATP binding)|GO:0005887(integral to plasma membrane)|GO:0006468(protein phosphorylation)|GO:0007399(nervous system development)|GO:0007417(central nervous system development)|GO:0009615(response to virus)|GO:0016197(endoso…	0.182626	0.11669	0.144724	0.0862494	0.067795	0.0850127	0.401728	0.545244	0.270001	0.347941	0.307424	0.327125	3	6	3.324	0.000118		doublecortin-like kinase 1	Homo sapiens doublecortin-like kinase 1 (DCLK1), transcript variant 4, mRNA [NM_001195430]	GGACCATGTTATTCCTCTTGAAGTTAACTTTGTGACACTTACCACCTTAGAATAACTATA
A_23_P85783	NM_006623	PHGDH	Hs.487296	26227	hs|1p12	GO:0004617(phosphoglycerate dehydrogenase activity)|GO:0005829(cytosol)|GO:0006541(glutamine metabolic process)|GO:0006544(glycine metabolic process)|GO:0006564(L-serine biosynthetic process)|GO:0006566(threonine metabolic process)|GO:0007420(brain development)|GO:0008652(cellular amino acid biosynthetic process)|GO:0009055(electron carrier activity)|GO:0009448(gamma-aminobutyric acid metabolic p…	1.63154	1.20383	1.35601	1.46174	1.26314	1.43483	3.73595	4.51449	5.22938	4.41616	4.55866	5.34744	6	6	3.323	1.26e-08		phosphoglycerate dehydrogenase	Homo sapiens phosphoglycerate dehydrogenase (PHGDH), mRNA [NM_006623]	TTGGTCCAAGGCACTACACCTGTACTGCAGGGGCTCAATGGAGCTGTCTTCAGGCCAGAA
A_23_P119254	NM_018154	ASF1B	Hs.26516	55723	hs|19p13.12	GO:0000790(nuclear chromatin)|GO:0005515(protein binding)|GO:0005634(nucleus)|GO:0005730(nucleolus)|GO:0006335(DNA replication-dependent nucleosome assembly)|GO:0006336(DNA replication-independent nucleosome assembly)|GO:0006351(transcription, DNA-dependent)|GO:0006355(regulation of transcription, DNA-dependent)|GO:0007275(multicellular organismal development)|GO:0007283(spermatogenesis)|GO:00165…	2.29375	3.74257	4.18314	3.88464	3.6168	3.51112	12.1654	12.3022	10.8037	12.5577	9.79068	11.9432	6	6	3.32	4.79e-06		anti-silencing function 1B histone chaperone	Homo sapiens anti-silencing function 1B histone chaperone (ASF1B), mRNA [NM_018154]	AGGAACCATGTTGCCTTTCCTGTCAATCACAGCCACCTTCCTGTTATCTCCTAAATGGAT
A_23_P24192	NM_015179	RRP12	Hs.434251	23223	hs|10q24.1	GO:0005730(nucleolus)|GO:0016021(integral to membrane)|GO:0031965(nuclear membrane)	2.73537	1.78012	1.8295	2.09306	2.03107	2.1084	6.99995	7.12593	6.0641	7.55987	6.106	7.65764	6	6	3.32	9.07e-08		ribosomal RNA processing 12 homolog (S. cerevisiae)	Homo sapiens ribosomal RNA processing 12 homolog (S. cerevisiae) (RRP12), transcript variant 1, mRNA [NM_015179]	GAGGAAGGTGCCAAAGGCGAAGATGAAGAGATGGCTGACCCAATGGAAGATGTGATCATC
A_33_P3256858	NM_001134875	C14orf80	Hs.720306	283643	hs|14q32.33		6.33771	3.44907	3.44649	2.74157	3.42123	4.14424	11.1727	11.3437	12.7989	14.6156	11.9882	13.7056	6	6	3.316	4.85e-05		chromosome 14 open reading frame 80	Homo sapiens chromosome 14 open reading frame 80 (C14orf80), transcript variant 1, mRNA [NM_001134875]	CTTGAGGAGGTCGTGACAGGCTCAGCCTGGTGGTCTGGAGGGGACTCGGAAATAAATTGT
A_23_P81392	NM_015238	WWC1	Hs.484047	23286	hs|5q34	GO:0000122(negative regulation of transcription from RNA polymerase II promoter)|GO:0003713(transcription coactivator activity)|GO:0005515(protein binding)|GO:0005634(nucleus)|GO:0005737(cytoplasm)|GO:0005829(cytosol)|GO:0006351(transcription, DNA-dependent)|GO:0016477(cell migration)|GO:0019900(kinase binding)|GO:0030010(establishment of cell polarity)|GO:0030674(protein binding, bridging)|GO:00…	0.0560967	0.120536	0.0871424	0.0979666	0.0728999	0.10896	0.294022	0.245793	0.356798	0.357181	0.210459	0.306511	1	5	3.302	1.32e-05		WW and C2 domain containing 1	Homo sapiens WW and C2 domain containing 1 (WWC1), transcript variant 3, mRNA [NM_015238]	TCTAGTGCTCTTGTTGGTTTGAAGATGAACCGACTTTTTAGTTTGGGTCCTACTGTTGTT
A_24_P55148	NM_021058	HIST1H2BJ	Hs.656567	8970	hs|6p22.1	GO:0000786(nucleosome)|GO:0002227(innate immune response in mucosa)|GO:0003677(DNA binding)|GO:0005615(extracellular space)|GO:0005634(nucleus)|GO:0005654(nucleoplasm)|GO:0006325(chromatin organization)|GO:0006334(nucleosome assembly)|GO:0019731(antibacterial humoral response)|GO:0046982(protein heterodimerization activity)|GO:0050830(defense response to Gram-positive bacterium)	0.165613	0.29518	0.254227	0.256125	0.207222	0.226513	0.753173	0.684427	0.859665	0.7884	0.829925	0.666282	5	6	3.301	2.3e-06		histone cluster 1, H2bj	Homo sapiens histone cluster 1, H2bj (HIST1H2BJ), mRNA [NM_021058]	TGACACCGGCATTTCGTCCAAGGCCATGGGCATCATGAATTCGTTTGTGAACGACATTTT
A_33_P3339375	NM_001039841	ARHGAP11B	Hs.659621	89839	hs|15q13.2	GO:0005096(GTPase activator activity)|GO:0005829(cytosol)|GO:0007264(small GTPase mediated signal transduction)|GO:0043547(positive regulation of GTPase activity)|GO:0051056(regulation of small GTPase mediated signal transduction)	0.0298494	0.0590595	0.0563387	0.0761885	0.0693614	0.0854794	0.240294	0.147385	0.213603	0.254011	0.235151	0.126803	1	5	3.294	0.000133		Rho GTPase activating protein 11B	Homo sapiens Rho GTPase activating protein 11B (ARHGAP11B), mRNA [NM_001039841]	TCACTGGAAGGCTTTGAAGAAGGTGAATATGAAACTCCTGGTGAATATAAGAGAAAGAGA
A_23_P429491	NM_145018	DDIAS	Hs.165607	220042	hs|11q14.1	GO:0005634(nucleus)|GO:0005737(cytoplasm)|GO:0006915(apoptotic process)|GO:0006974(response to DNA damage stimulus)|GO:0007286(spermatid development)|GO:0030097(hemopoiesis)|GO:0034644(cellular response to UV)|GO:0071345(cellular response to cytokine stimulus)|GO:0071447(cellular response to hydroperoxide)|GO:0071480(cellular response to gamma radiation)|GO:0071850(mitotic cell cycle arrest)|GO:2…	0.81285	0.918761	0.891137	1.03198	0.910396	0.910318	2.75463	2.82025	2.83668	3.65219	2.71642	3.31559	6	6	3.292	1.72e-08		DNA damage-induced apoptosis suppressor	Homo sapiens DNA damage-induced apoptosis suppressor (DDIAS), mRNA [NM_145018]	GCTTGGTCACCTGAATTGTTTTCATAAAAAGTCACCTGAACCCAATTCCTGAACTTTTAA
A_32_P114896	NM_006601	PTGES3	Hs.50425	10728	hs|12q13.3	GO:0000723(telomere maintenance)|GO:0000781(chromosome, telomeric region)|GO:0001516(prostaglandin biosynthetic process)|GO:0003720(telomerase activity)|GO:0005515(protein binding)|GO:0005634(nucleus)|GO:0005697(telomerase holoenzyme complex)|GO:0005730(nucleolus)|GO:0005737(cytoplasm)|GO:0005829(cytosol)|GO:0006278(RNA-dependent DNA replication)|GO:0007165(signal transduction)|GO:0019369(arachid…	0.180634	0.691145	0.535011	0.986617	0.642605	0.448344	1.85987	1.54639	2.00082	1.78852	1.63704	1.42614	5	6	3.289	0.00344		prostaglandin E synthase 3 (cytosolic)	Homo sapiens prostaglandin E synthase 3 (cytosolic) (PTGES3), transcript variant 1, mRNA [NM_006601]	GCCAGATCTGGAGTAAGAAATATTTCATCACCTGGATTTTGAGAAAGAAAATAACTTCTC
A_23_P386241	NM_001042353	FAM110A	Hs.574822	83541	hs|20p13	GO:0000922(spindle pole)|GO:0005515(protein binding)|GO:0005737(cytoplasm)|GO:0005815(microtubule organizing center)	5.13966	2.53402	2.49559	2.3577	2.56697	2.79697	8.82473	9.10174	10.4589	9.23894	9.02867	9.92149	6	6	3.288	0.000113		family with sequence similarity 110, member A	Homo sapiens family with sequence similarity 110, member A (FAM110A), transcript variant 3, mRNA [NM_001042353]	ACTATAGGAGGGACTGGTTAGGAGTCTGCATTGCTTTGACTTCCCTCTCCTTGGTTAATA
A_23_P52017	NM_018136	ASPM	Hs.121028	259266	hs|1q31.3	GO:0000922(spindle pole)|GO:0001764(neuron migration)|GO:0002052(positive regulation of neuroblast proliferation)|GO:0005516(calmodulin binding)|GO:0005634(nucleus)|GO:0005737(cytoplasm)|GO:0007067(mitosis)|GO:0007283(spermatogenesis)|GO:0021873(forebrain neuroblast division)|GO:0030496(midbody)|GO:0045665(negative regulation of neuron differentiation)|GO:0045769(negative regulation of asymmetric…	8.45897	7.16964	7.70761	5.86136	7.42221	7.84472	24.2012	24.5238	21.6646	27.6877	21.8773	25.6401	6	6	3.283	1.15e-08		asp (abnormal spindle) homolog, microcephaly associated (Drosophila)	Homo sapiens asp (abnormal spindle) homolog, microcephaly associated (Drosophila) (ASPM), transcript variant 1, mRNA [NM_018136]	ATCACAAATCCCCTGCAAGCTATTCAAATGGTGATGGATACGCTTGGCATTCCTTATTAG
A_32_P9382	NM_001071775	MZT1	Hs.28465	440145	hs|13q21.33	GO:0005515(protein binding)|GO:0005813(centrosome)|GO:0005819(spindle)|GO:0008274(gamma-tubulin ring complex)|GO:0033566(gamma-tubulin complex localization)	2.77607	2.39613	2.64999	1.50656	2.00971	2.1942	7.78875	7.82586	6.19323	7.63902	6.97323	7.22279	6	6	3.278	9.61e-06		mitotic spindle organizing protein 1	Homo sapiens mitotic spindle organizing protein 1 (MZT1), mRNA [NM_001071775]	AACAAAGCAGGAAAATATATTGAGAAGGGATCGTGTTTACAGAGGACTTCTTTAAAGTGT
A_33_P3405500	NM_014363	SACS	Hs.159492	26278	hs|13q12.12	GO:0005524(ATP binding)|GO:0005634(nucleus)|GO:0005737(cytoplasm)|GO:0005739(mitochondrion)|GO:0006457(protein folding)|GO:0008219(cell death)|GO:0030424(axon)|GO:0030425(dendrite)|GO:0030544(Hsp70 protein binding)|GO:0051087(chaperone binding)|GO:0070628(proteasome binding)|GO:0070852(cell body fiber)|GO:0090084(negative regulation of inclusion body assembly)	0.837013	0.597806	0.637841	0.547377	0.66444	0.597617	1.96631	2.05481	2.38722	1.99938	2.05008	2.17487	6	6	3.277	2.96e-07		sacsin molecular chaperone	Homo sapiens sacsin molecular chaperone (SACS), transcript variant 1, mRNA [NM_014363]	ATTTTGGATAACTTGAAACCTCACCTTGTGGCTGCTTTAAAGGAAGCTGCCCAAACCCGA
A_23_P10647	NM_018659	CYTL1	Hs.13872	54360	hs|4p16.2	GO:0002062(chondrocyte differentiation)|GO:0005102(receptor binding)|GO:0005615(extracellular space)|GO:0007165(signal transduction)|GO:0045944(positive regulation of transcription from RNA polymerase II promoter)|GO:0048839(inner ear development)|GO:0050650(chondroitin sulfate proteoglycan biosynthetic process)|GO:0051091(positive regulation of sequence-specific DNA binding transcription factor …	0.617504	1.91033	1.64628	2.13377	1.66384	1.36048	4.60971	5.22436	5.64196	5.65355	4.30009	3.47018	6	6	3.27	0.000629		cytokine-like 1	Homo sapiens cytokine-like 1 (CYTL1), mRNA [NM_018659]	TAGTTGTATCTGAAACTGTTATGTATCTCTCTACCTTCTGGAAAACAGGGCTGGTATTCC
A_33_P3237874	NM_001100620	TROAP	Hs.524399	10024	hs|12q13.12	GO:0005515(protein binding)|GO:0005737(cytoplasm)|GO:0007155(cell adhesion)	1.71599	1.45518	1.65255	1.04802	1.45985	1.48432	5.60049	4.72957	4.57508	4.51811	4.93867	4.22297	6	6	3.268	6.14e-07		trophinin associated protein	Homo sapiens trophinin associated protein (TROAP), transcript variant 2, mRNA [NM_001100620]	AGCTCCTGGAAAGCTCTTTGCTCTTAGAAGATCTCCCTTTCCTCCAGCAAAATGTCATCT
A_24_P225970	NM_001012409	SGOL1	Hs.105153	151648	hs|3p24.3	GO:0000278(mitotic cell cycle)|GO:0000775(chromosome, centromeric region)|GO:0000776(kinetochore)|GO:0000777(condensed chromosome kinetochore)|GO:0000779(condensed chromosome, centromeric region)|GO:0000780(condensed nuclear chromosome, centromeric region)|GO:0000922(spindle pole)|GO:0005515(protein binding)|GO:0005634(nucleus)|GO:0005730(nucleolus)|GO:0005737(cytoplasm)|GO:0005813(centrosome)|GO…	0.241191	0.427251	0.417734	0.36378	0.459198	0.377161	1.10266	1.25719	1.28045	1.30705	1.2376	1.14484	6	6	3.265	2.37e-05		shugoshin-like 1 (S. pombe)	Homo sapiens shugoshin-like 1 (S. pombe) (SGOL1), transcript variant A1, mRNA [NM_001012409]	ACCAATGTCTCCTTGTATCCTGTTGTGAAAATCAGAAGACTTTCTCTTTCTCCAAAAAAG
A_23_P118150	NM_015161	ARL6IP1	Hs.634882	23204	hs|16p12.3	GO:0005515(protein binding)|GO:0005784(Sec61 translocon complex)|GO:0005829(cytosol)|GO:0006613(cotranslational protein targeting to membrane)|GO:0016021(integral to membrane)	1.33812	2.85303	2.95922	4.29203	3.03029	3.06405	7.44175	9.73527	8.47459	10.4403	9.82586	8.62896	6	6	3.263	0.000371		ADP-ribosylation factor-like 6 interacting protein 1	Homo sapiens ADP-ribosylation factor-like 6 interacting protein 1 (ARL6IP1), mRNA [NM_015161]	TTCAGATTTTCAGCTGACATTAGCTATAGTATACAGTAGGTTAAGACTCATGTCTATGAC
A_23_P401	NM_016343	CENPF	Hs.497741	1063	hs|1q41	GO:0000085(G2 phase of mitotic cell cycle)|GO:0000086(G2/M transition of mitotic cell cycle)|GO:0000087(M phase of mitotic cell cycle)|GO:0000278(mitotic cell cycle)|GO:0000775(chromosome, centromeric region)|GO:0000776(kinetochore)|GO:0000785(chromatin)|GO:0000922(spindle pole)|GO:0000940(condensed chromosome outer kinetochore)|GO:0003682(chromatin binding)|GO:0005515(protein binding)|GO:0005634…	15.288	8.95622	9.49726	8.64251	9.5102	10.3073	31.6135	36.1033	32.9621	36.6569	29.5621	32.6197	6	6	3.263	7.23e-06		centromere protein F, 350/400kDa	Homo sapiens centromere protein F, 350/400kDa (CENPF), mRNA [NM_016343]	AAAGTTTGGAAGCACTGATCACCTGTTAGCATTGCCATTCCTCTACTGCAATGTAAATAG
A_23_P253752	NM_138419	MTFR2	Hs.121536	113115	hs|6q23.3	GO:0000266(mitochondrial fission)|GO:0005739(mitochondrion)|GO:0007005(mitochondrion organization)|GO:0009060(aerobic respiration)	0.534783	0.5554	0.458413	0.595709	0.516003	0.991563	1.81988	2.05816	1.93668	2.09167	1.62982	2.02274	6	6	3.262	4.35e-05		mitochondrial fission regulator 2	Homo sapiens mitochondrial fission regulator 2 (MTFR2), transcript variant 2, mRNA [NM_138419]	GGTATCAGCAACACAAGCCTTCTAAACTCAAGGATTTAAACTCAACTTAAGGTTGAGCTT
A_24_P943997	NM_178815	ARL5B	Hs.25362	221079	hs|10p12.31	GO:0005525(GTP binding)|GO:0005622(intracellular)|GO:0007264(small GTPase mediated signal transduction)	0.0706178	0.134324	0.156521	0.213406	0.174425	0.107174	0.36276	0.426501	0.451121	0.478836	0.517107	0.411766	5	6	3.261	0.000418		ADP-ribosylation factor-like 5B	Homo sapiens ADP-ribosylation factor-like 5B (ARL5B), mRNA [NM_178815]	GGTTTTCACTCAATCTTTCCTGTTACAGTAACGTGAAAACTGATTATTCTTTACTCCAAG
A_33_P3224795	NM_001271840	IKZF5	Hs.501289	64376	hs|10q26.13	GO:0003677(DNA binding)|GO:0005634(nucleus)|GO:0006351(transcription, DNA-dependent)|GO:0006355(regulation of transcription, DNA-dependent)|GO:0046872(metal ion binding)	0.281531	0.344504	0.177662	0.456744	0.236658	0.30297	0.959763	0.887298	0.981341	0.884778	0.972168	0.940351	6	6	3.259	0.000245		IKAROS family zinc finger 5 (Pegasus)	Homo sapiens IKAROS family zinc finger 5 (Pegasus) (IKZF5), transcript variant 1, mRNA [NM_001271840]	CATATGGGATGTCATGGGTATGAAAATCCTTTTCAGTGTAATATATGTGGATGCAAATGT
A_24_P330112	NM_018048	MAGOHB	Hs.104650	55110	hs|12p13.2	GO:0005634(nucleus)|GO:0006397(mRNA processing)|GO:0008380(RNA splicing)|GO:0051028(mRNA transport)	0.0279934	0.0802775	0.0463498	0.0796758	0.0632655	0.0741331	0.251607	0.22986	0.19181	0.202905	0.151585	0.135881	1	4	3.256	0.000305		mago-nashi homolog B (Drosophila)	Homo sapiens mago-nashi homolog B (Drosophila) (MAGOHB), mRNA [NM_018048]	CATTATGCAAGTACGCTATCATCTTCAGGTCTTTTGTATGTAAAATGTTTCTGTTCCAGT
A_33_P3767927	NM_001018077	NR3C1	Hs.122926	2908	hs|5q31.3	GO:0000978(RNA polymerase II core promoter proximal region sequence-specific DNA binding)|GO:0001077(RNA polymerase II core promoter proximal region sequence-specific DNA binding transcription factor activity involved in positive regulation of transcription)|GO:0003700(sequence-specific DNA binding transcription factor activity)|GO:0004883(glucocorticoid receptor activity)|GO:0005496(steroid bind…	10.1679	8.64964	9.06347	8.00617	8.56106	8.31697	32.1571	30.8929	27.3049	26.3859	27.8049	26.8401	6	6	3.249	2.66e-10		nuclear receptor subfamily 3, group C, member 1 (glucocorticoid receptor)	Homo sapiens nuclear receptor subfamily 3, group C, member 1 (glucocorticoid receptor) (NR3C1), transcript variant 5, mRNA [NM_001018077]	GTGAAAATGGGTTGGTGCTTCTAACCTGATGGCACTTAGCTATCAGAAGACCACAAAAAT
A_23_P12816	NM_018063	HELLS	Hs.655830	3070	hs|10q23.33	GO:0000775(chromosome, centromeric region)|GO:0001655(urogenital system development)|GO:0003677(DNA binding)|GO:0003682(chromatin binding)|GO:0004386(helicase activity)|GO:0005515(protein binding)|GO:0005524(ATP binding)|GO:0005634(nucleus)|GO:0005721(centromeric heterochromatin)|GO:0006346(methylation-dependent chromatin silencing)|GO:0006351(transcription, DNA-dependent)|GO:0007067(mitosis)|GO:…	0.130309	0.555767	0.620012	0.752421	0.790817	0.563606	1.40641	1.99145	1.74043	1.69203	1.66781	1.2835	5	6	3.247	0.00689		helicase, lymphoid-specific	Homo sapiens helicase, lymphoid-specific (HELLS), transcript variant 1, mRNA [NM_018063]	TAGATGTCATAGAATTGGTCAGACAAAGCCAGTTGTTGTTTATCGCCTTGTTACAGCAAA
A_33_P3410599	NM_017633	FAM46A	Hs.10784	55603	hs|6q14.1	GO:0010468(regulation of gene expression)|GO:0030193(regulation of blood coagulation)	0.207132	0.295593	0.239227	0.184853	0.186128	0.234386	0.871215	0.589913	0.578367	0.941233	0.664155	0.740865	6	6	3.244	9.61e-07		family with sequence similarity 46, member A	Homo sapiens family with sequence similarity 46, member A (FAM46A), mRNA [NM_017633]	GAATCAGTGCTAGAGGGAACAGATTGTGAATTTTGTTTACAGCATCCAATATTTGGATTT
A_23_P57379	NM_003504	CDC45	Hs.474217	8318	hs|22q11.21	GO:0000076(DNA replication checkpoint)|GO:0000082(G1/S transition of mitotic cell cycle)|GO:0000083(regulation of transcription involved in G1/S phase of mitotic cell cycle)|GO:0000278(mitotic cell cycle)|GO:0005515(protein binding)|GO:0005634(nucleus)|GO:0005654(nucleoplasm)|GO:0005737(cytoplasm)|GO:0005813(centrosome)|GO:0006260(DNA replication)|GO:0006270(DNA-dependent DNA replication initiati…	7.32318	5.65907	5.58758	4.39993	6.02831	6.19545	16.8624	17.9754	19.7759	21.5918	17.0643	19.9026	6	6	3.239	3.57e-07		cell division cycle 45	Homo sapiens cell division cycle 45 (CDC45), transcript variant 2, mRNA [NM_003504]	AGGATCGGAGCAAGTTTCTGGACGCACTTATTTCCCTCCTGTCCTAGGAATTTGATTCTT
A_23_P45799	NM_004153	ORC1	Hs.17908	4998	hs|1p32.3	GO:0000082(G1/S transition of mitotic cell cycle)|GO:0000083(regulation of transcription involved in G1/S phase of mitotic cell cycle)|GO:0000278(mitotic cell cycle)|GO:0000808(origin recognition complex)|GO:0003677(DNA binding)|GO:0003682(chromatin binding)|GO:0005515(protein binding)|GO:0005524(ATP binding)|GO:0005634(nucleus)|GO:0005654(nucleoplasm)|GO:0005664(nuclear origin of replication rec…	0.341305	0.405101	0.380915	0.330142	0.389497	0.369949	1.07999	1.05208	1.29939	1.24707	1.24028	1.26461	6	6	3.238	4.28e-10		origin recognition complex, subunit 1	Homo sapiens origin recognition complex, subunit 1 (ORC1), transcript variant 1, mRNA [NM_004153]	TGTTCTGGAACAGAGCTTCCTGAGAGCCATCCTCGCAGAGTTCCGTCGATCAGGACTGGA
A_23_P106405	NM_002487	NDN	Hs.50130	4692	hs|15q11.2	GO:0001764(neuron migration)|GO:0003016(respiratory system process)|GO:0003677(DNA binding)|GO:0005634(nucleus)|GO:0005813(centrosome)|GO:0005829(cytosol)|GO:0006351(transcription, DNA-dependent)|GO:0006355(regulation of transcription, DNA-dependent)|GO:0007399(nervous system development)|GO:0007413(axonal fasciculation)|GO:0007417(central nervous system development)|GO:0008285(negative regulatio…	1.10645	0.771442	0.78299	0.790999	0.853026	0.89562	2.33652	3.0575	2.71202	3.03258	2.66067	2.96288	6	6	3.235	2.74e-08		necdin, melanoma antigen (MAGE) family member	Homo sapiens necdin, melanoma antigen (MAGE) family member (NDN), mRNA [NM_002487]	AATACATTGAGAAAGTTTCCATCTTATTCTTTTATATGGGACTGATGATGTGTGTTGGGG
A_23_P37514	NM_015492	C15orf39	Hs.17936	56905	hs|15q24.2	GO:0005737(cytoplasm)	7.85309	3.47867	3.89445	3.1086	3.46142	3.93018	12.9775	12.8859	13.8281	13.4928	12.2007	13.438	6	6	3.231	0.000309		chromosome 15 open reading frame 39	Homo sapiens chromosome 15 open reading frame 39 (C15orf39), mRNA [NM_015492]	TGGGCCTCATTTAAGGGATTCTGATGAGCCGATGGGCCCTGGAGGCAGCCCATTAAAGCA
A_33_P3406939	NM_194313	KIF24	Hs.710246	347240	hs|9p13.3	GO:0003777(microtubule motor activity)|GO:0005515(protein binding)|GO:0005524(ATP binding)|GO:0005814(centriole)|GO:0005871(kinesin complex)|GO:0005874(microtubule)|GO:0007018(microtubule-based movement)|GO:0007019(microtubule depolymerization)|GO:0008017(microtubule binding)|GO:0008152(metabolic process)|GO:0042384(cilium assembly)|GO:0043234(protein complex)	0.124924	0.175149	0.155279	0.110247	0.12883	0.107503	0.379128	0.352037	0.389512	0.511417	0.3858	0.565641	3	6	3.222	9.36e-07		kinesin family member 24	Homo sapiens kinesin family member 24 (KIF24), mRNA [NM_194313]	CTCCCATAAAACAGCCTTGGTAATAAAGAAGTTATCACACCAAGACATACCTTTTAGATT
A_23_P218827	NM_199420	POLQ	Hs.241517	10721	hs|3q13.33	GO:0003684(damaged DNA binding)|GO:0003887(DNA-directed DNA polymerase activity)|GO:0004386(helicase activity)|GO:0005524(ATP binding)|GO:0005654(nucleoplasm)|GO:0006200(ATP catabolic process)|GO:0006261(DNA-dependent DNA replication)|GO:0006281(DNA repair)|GO:0043142(single-stranded DNA-dependent ATPase activity)	0.529737	0.455758	0.684652	0.523762	0.609619	0.567011	1.48523	1.51554	1.79054	2.21308	1.86842	2.00097	6	6	3.22	9.63e-08		polymerase (DNA directed), theta	Homo sapiens polymerase (DNA directed), theta (POLQ), mRNA [NM_199420]	CATAGGCAGATAAAGATTTGGTTTCACCCTGGTGGTGGTAGGCATCGTGTGTGACTTTTT
A_23_P126120	NM_033319	CENPL	Hs.720473	91687	hs|1q25.1	GO:0000278(mitotic cell cycle)|GO:0000775(chromosome, centromeric region)|GO:0005634(nucleus)|GO:0005829(cytosol)	0.119241	0.249758	0.26907	0.306329	0.23107	0.203437	0.736874	0.550063	0.913399	0.680406	0.941146	0.541734	5	6	3.219	5.98e-05		centromere protein L	Homo sapiens centromere protein L (CENPL), transcript variant 2, mRNA [NM_033319]	TTTCAAAATTCATTTATCAGCCACAAGATTAGTTCGTGTTTCAACATCTGTAGCTTCAGC
A_33_P3716128	NM_005496	SMC4	Hs.58992	10051	hs|3q25.33	GO:0000070(mitotic sister chromatid segregation)|GO:0000278(mitotic cell cycle)|GO:0000796(condensin complex)|GO:0005515(protein binding)|GO:0005524(ATP binding)|GO:0005634(nucleus)|GO:0005654(nucleoplasm)|GO:0005730(nucleolus)|GO:0005737(cytoplasm)|GO:0005829(cytosol)|GO:0007076(mitotic chromosome condensation)|GO:0010032(meiotic chromosome condensation)|GO:0045132(meiotic chromosome segregation…	1.57046	1.22098	2.28708	2.90721	2.08789	2.01187	4.83377	7.93812	6.97443	5.00029	5.39582	8.24192	6	6	3.218	2.95e-05		structural maintenance of chromosomes 4	Homo sapiens structural maintenance of chromosomes 4 (SMC4), transcript variant 1, mRNA [NM_005496]	CTAAGGGACTTTGTTGAACTTTATGCTGAAGATTCTTCAAGTTGATTCAGTGTATTACTG
A_23_P116902	NM_021071	ART4	Hs.655792	420	hs|12p12.3	GO:0003956(NAD(P)+-protein-arginine ADP-ribosyltransferase activity)|GO:0005886(plasma membrane)|GO:0006471(protein ADP-ribosylation)|GO:0006525(arginine metabolic process)|GO:0016020(membrane)|GO:0031225(anchored to membrane)	0.429913	0.322948	0.328549	0.332492	0.308322	0.299763	0.907011	1.1559	1.16707	1.21845	1.05484	0.9878	6	6	3.217	1.55e-08		ADP-ribosyltransferase 4 (Dombrock blood group)	Homo sapiens ADP-ribosyltransferase 4 (Dombrock blood group) (ART4), mRNA [NM_021071]	ATCTCTCTCCTTTTTGACCAGTGTCATCATCTTTTCCAAAAGCAGAGTATAAAGAAATCT
A_33_P3339212	NM_004237	TRIP13	Hs.436187	9319	hs|5p15.33	GO:0001556(oocyte maturation)|GO:0001673(male germ cell nucleus)|GO:0003712(transcription cofactor activity)|GO:0005515(protein binding)|GO:0005524(ATP binding)|GO:0005634(nucleus)|GO:0006302(double-strand break repair)|GO:0006366(transcription from RNA polymerase II promoter)|GO:0007130(synaptonemal complex assembly)|GO:0007131(reciprocal meiotic recombination)|GO:0007141(male meiosis I)|GO:0007…	4.85082	3.58468	4.27406	3.70699	4.45642	4.34247	12.6538	13.841	12.4431	14.7916	13.3997	13.622	6	6	3.215	3.12e-08		thyroid hormone receptor interactor 13	Homo sapiens thyroid hormone receptor interactor 13 (TRIP13), transcript variant 1, mRNA [NM_004237]	GGTCAGTTACTGGTCTCTTTCTCCGAATGTTATGTTTTGCTTTTATCTCACAGTAAAATA
A_24_P288754	NM_002641	PIGA	Hs.137154	5277	hs|Xp22.2	GO:0000506(glycosylphosphatidylinositol-N-acetylglucosaminyltransferase (GPI-GnT) complex)|GO:0005515(protein binding)|GO:0005789(endoplasmic reticulum membrane)|GO:0006501(C-terminal protein lipidation)|GO:0006506(GPI anchor biosynthetic process)|GO:0008194(UDP-glycosyltransferase activity)|GO:0009893(positive regulation of metabolic process)|GO:0016021(integral to membrane)|GO:0016254(preassemb…	2.55234	1.47664	1.44274	1.52701	1.34485	1.83166	4.30499	5.88523	4.41041	6.06971	5.38431	6.05372	6	6	3.204	4.42e-06		phosphatidylinositol glycan anchor biosynthesis, class A	Homo sapiens phosphatidylinositol glycan anchor biosynthesis, class A (PIGA), transcript variant 1, mRNA [NM_002641]	CTTTCTGGATACCTTAATTGTAACTGTCAGTTTGCACTGGTCGGTATATGGAAACACATT
A_23_P251937	NM_030627	CPEB4	Hs.127126	80315	hs|5q35.2	GO:0000166(nucleotide binding)|GO:0002931(response to ischemia)|GO:0005515(protein binding)|GO:0005634(nucleus)|GO:0005737(cytoplasm)|GO:0005783(endoplasmic reticulum)|GO:0014069(postsynaptic density)|GO:0030425(dendrite)|GO:0035235(ionotropic glutamate receptor signaling pathway)|GO:0042149(cellular response to glucose starvation)|GO:0043524(negative regulation of neuron apoptotic process)|GO:00…	1.79843	1.84402	1.85189	1.90848	1.09643	1.80191	4.74217	6.87282	5.05539	5.79555	4.66934	5.57342	6	6	3.2	1.77e-06		cytoplasmic polyadenylation element binding protein 4	Homo sapiens cytoplasmic polyadenylation element binding protein 4 (CPEB4), mRNA [NM_030627]	GTATGTCAGTTAATTGTACTACTTGGCTGAATTTCCATATAGTTTTTACTGTGTATGGGG
A_33_P3340468	ENST00000403304	CENPI	Hs.348920	2491	hs|Xq22.1	GO:0000278(mitotic cell cycle)|GO:0000776(kinetochore)|GO:0005515(protein binding)|GO:0005654(nucleoplasm)|GO:0005829(cytosol)|GO:0006334(nucleosome assembly)|GO:0007548(sex differentiation)|GO:0034080(CenH3-containing nucleosome assembly at centromere)	0.176003	0.196621	0.211661	0.128182	0.215815	0.183824	0.553039	0.607126	0.76035	0.521895	0.572418	0.523405	6	6	3.199	6.22e-07		centromere protein I	centromere protein I [Source:HGNC Symbol;Acc:3968] [ENST00000403304]	TAGGAAATAACTCGGAACCTGTAACGTCCCACTGGTTTGGACATATTCCTCTCCTGATCT
A_23_P68610	NM_012112	TPX2	Hs.244580	22974	hs|20q11.21	GO:0000922(spindle pole)|GO:0005515(protein binding)|GO:0005524(ATP binding)|GO:0005525(GTP binding)|GO:0005634(nucleus)|GO:0005730(nucleolus)|GO:0005737(cytoplasm)|GO:0005819(spindle)|GO:0005874(microtubule)|GO:0006915(apoptotic process)|GO:0007067(mitosis)|GO:0008283(cell proliferation)|GO:0015630(microtubule cytoskeleton)|GO:0019901(protein kinase binding)|GO:0032147(activation of protein kina…	6.86107	5.74228	6.64873	4.65662	5.24336	5.02773	18.0845	18.4593	18.9069	18.0854	19.5262	15.3622	6	6	3.196	3.49e-07		TPX2, microtubule-associated	Homo sapiens TPX2, microtubule-associated (TPX2), mRNA [NM_012112]	AGAGAACCCATTTCTCCAGACTTTTACCTACCCGTGCCTGAGAAAGCATACTTGACAACT
A_23_P149200	NM_001255	CDC20	Hs.524947	991	hs|1p34.2	GO:0000278(mitotic cell cycle)|GO:0000922(spindle pole)|GO:0005515(protein binding)|GO:0005634(nucleus)|GO:0005654(nucleoplasm)|GO:0005680(anaphase-promoting complex)|GO:0005730(nucleolus)|GO:0005737(cytoplasm)|GO:0005813(centrosome)|GO:0005819(spindle)|GO:0005829(cytosol)|GO:0007049(cell cycle)|GO:0007067(mitosis)|GO:0007094(mitotic cell cycle spindle assembly checkpoint)|GO:0008022(protein C-te…	7.70835	8.47731	8.96311	7.03173	8.49664	8.30146	24.4158	24.6652	27.7984	25.4917	25.9928	27.7821	6	6	3.194	1.1e-09		cell division cycle 20	Homo sapiens cell division cycle 20 (CDC20), mRNA [NM_001255]	GGTAATGATAACTTGGTCAATGTGTGGCCTAGTGCTCCTGGAGAGGGTGGCTGGGTTCCT
A_24_P376556	NM_018947	CYCS	Hs.437060	54205	hs|7p15.3	GO:0000159(protein phosphatase type 2A complex)|GO:0004722(protein serine/threonine phosphatase activity)|GO:0005506(iron ion binding)|GO:0005515(protein binding)|GO:0005634(nucleus)|GO:0005739(mitochondrion)|GO:0005743(mitochondrial inner membrane)|GO:0005758(mitochondrial intermembrane space)|GO:0005829(cytosol)|GO:0006309(apoptotic DNA fragmentation)|GO:0006915(apoptotic process)|GO:0008635(ac…	3.90252	12.0134	9.77335	12.1843	10.3107	8.753	26.4801	29.0261	33.2563	30.4503	27.9561	24.5888	6	6	3.194	0.000813		cytochrome c, somatic	Homo sapiens cytochrome c, somatic (CYCS), mRNA [NM_018947]	ACTCCAATTCAGTAAATGGTATCACTCGTTTACCCCTTTTAAAGATATGATTAGACTTCG
A_23_P411335	NM_152524	SGOL2	Hs.655182	151246	hs|2q33.1	GO:0000278(mitotic cell cycle)|GO:0000775(chromosome, centromeric region)|GO:0000777(condensed chromosome kinetochore)|GO:0005515(protein binding)|GO:0005634(nucleus)|GO:0005730(nucleolus)|GO:0005829(cytosol)|GO:0030892(mitotic cohesin complex)|GO:0051754(meiotic sister chromatid cohesion, centromeric)	0.671628	0.700471	0.598639	0.967685	0.972527	0.949914	2.77963	2.94056	2.41739	3.17458	1.90325	2.22037	6	6	3.19	2.13e-06		shugoshin-like 2 (S. pombe)	Homo sapiens shugoshin-like 2 (S. pombe) (SGOL2), transcript variant 1, mRNA [NM_152524]	AGATTCTTCCTTTGACAGTGTTCGTGAAGGTTTAGTACCTTTGAGCGTTTCTTCTGGTAA
A_24_P349965	NM_007109	TCF19	Hs.584807	6941	hs|6p21.33	GO:0003700(sequence-specific DNA binding transcription factor activity)|GO:0005634(nucleus)|GO:0006351(transcription, DNA-dependent)|GO:0006357(regulation of transcription from RNA polymerase II promoter)|GO:0008270(zinc ion binding)|GO:0008283(cell proliferation)	0.131564	0.0779903	0.0555752	0.142426	0.0576025	0.0711144	0.205275	0.239932	0.248136	0.418293	0.228136	0.300766	1	4	3.19	0.00029		transcription factor 19	Homo sapiens transcription factor 19 (TCF19), transcript variant 1, mRNA [NM_007109]	CAACAGAAATAAGATGATTTCTAAGTATAAAGCCATTTAAGAATTCCAGAGTAGGGTGGG
A_24_P328872	NM_012073	CCT5	Hs.1600	22948	hs|5p15.2	GO:0002199(sperm protein complex)|GO:0005524(ATP binding)|GO:0005730(nucleolus)|GO:0005737(cytoplasm)|GO:0005813(centrosome)|GO:0005829(cytosol)|GO:0005832(chaperonin-containing T-complex)|GO:0005874(microtubule)|GO:0006457(protein folding)|GO:0007339(binding of sperm to zona pellucida)|GO:0009615(response to virus)|GO:0031681(G-protein beta-subunit binding)|GO:0044267(cellular protein metabolic …	0.0868293	0.0915733	0.240096	0.219566	0.141862	0.17829	0.462426	0.433538	0.462887	0.443613	0.476461	0.568502	3	6	3.189	0.000973		chaperonin containing TCP1, subunit 5 (epsilon)	Homo sapiens chaperonin containing TCP1, subunit 5 (epsilon) (CCT5), mRNA [NM_012073]	ATGTTTCTTAGCATTGTGATGATAAAGCTCATGATGAACTTTATCACTAGTTATGCCACC
A_23_P385861	NM_152562	CDCA2	Hs.33366	157313	hs|8p21.2	GO:0005634(nucleus)|GO:0005730(nucleolus)|GO:0005737(cytoplasm)|GO:0007067(mitosis)	2.57136	1.49499	1.67472	1.31712	1.72579	1.80915	5.92354	5.16937	5.00705	6.12113	5.12213	5.76092	6	6	3.186	1.43e-05		cell division cycle associated 2	Homo sapiens cell division cycle associated 2 (CDCA2), mRNA [NM_152562]	TGACATTTCCTGCAGAGTCTGTAGCAAGAGGGAAAGTAACCATCTATGCTGAAATGATCT
A_33_P3330211	NM_001127232	AUTS2	Hs.21631	26053	hs|7q11.22	GO:0003674(molecular_function)|GO:0005575(cellular_component)|GO:0008150(biological_process)	0.0771289	0.148266	0.125017	0.135221	0.115497	0.0695116	0.356488	0.343344	0.256678	0.377579	0.349283	0.389941	3	6	3.184	6.63e-05		autism susceptibility candidate 2	Homo sapiens autism susceptibility candidate 2 (AUTS2), transcript variant 3, mRNA [NM_001127232]	TTTCATTCAAAGAAGAGCAGACTCAGCCACCCACACCACTACAGCTCAGATCGAGAAAAT
A_23_P113634	NM_001755	CBFB	Hs.460988	865	hs|16q22.1	GO:0001649(osteoblast differentiation)|GO:0003677(DNA binding)|GO:0003700(sequence-specific DNA binding transcription factor activity)|GO:0003713(transcription coactivator activity)|GO:0005515(protein binding)|GO:0005575(cellular_component)|GO:0005634(nucleus)|GO:0006366(transcription from RNA polymerase II promoter)|GO:0030098(lymphocyte differentiation)|GO:0030099(myeloid cell differentiation)|…	2.25824	5.48829	5.31684	5.43589	4.88121	4.75976	14.7072	16.1693	13.2847	16.2619	12.7278	13.1107	6	6	3.178	0.000224		core-binding factor, beta subunit	Homo sapiens core-binding factor, beta subunit (CBFB), transcript variant 2, mRNA [NM_001755]	AAATGTTCCTGTTACCATCCTAATGTAAATACTGGATTTTTCTGTCATTTAGCACCATGC
A_24_P287473	NM_021818	SAV1	Hs.642842	60485	hs|14q22.1	GO:0001942(hair follicle development)|GO:0005515(protein binding)|GO:0005634(nucleus)|GO:0005737(cytoplasm)|GO:0005829(cytosol)|GO:0030216(keratinocyte differentiation)|GO:0035329(hippo signaling cascade)|GO:0043065(positive regulation of apoptotic process)|GO:0050680(negative regulation of epithelial cell proliferation)|GO:0060044(negative regulation of cardiac muscle cell proliferation)|GO:0060…	5.62835	3.88189	3.80927	4.83501	5.11542	5.36564	13.4938	14.3812	10.8171	17.8415	18.7129	16.1492	6	6	3.175	1.05e-06		salvador family WW domain containing protein 1	Homo sapiens salvador family WW domain containing protein 1 (SAV1), mRNA [NM_021818]	GTCTTCCAGAATACAAACTACTCCCAGTTAGATATCAGTGAGTTTGAATAACTGAAGAAA
A_33_P3240263	NM_015932	POMP	Hs.268742	51371	hs|13q12.3	GO:0000502(proteasome complex)|GO:0005515(protein binding)|GO:0005634(nucleus)|GO:0005730(nucleolus)|GO:0005783(endoplasmic reticulum)|GO:0005829(cytosol)|GO:0031090(organelle membrane)|GO:0043248(proteasome assembly)	0.290275	0.316271	0.31154	0.354572	0.208206	0.345762	0.938947	1.04696	0.921453	0.955126	0.767839	1.11926	6	6	3.172	9.19e-07		proteasome maturation protein	Homo sapiens proteasome maturation protein (POMP), mRNA [NM_015932]	CAAGGTTTTGATTTTGGTCTGGTCTTTAAGTGAAAAATTAAAGCAACCAGTAGATGTAGG
A_23_P118246	NM_016095	GINS2	Hs.433180	51659	hs|16q24.1	GO:0000278(mitotic cell cycle)|GO:0005515(protein binding)|GO:0005654(nucleoplasm)|GO:0006271(DNA strand elongation involved in DNA replication)	3.63943	2.73633	2.80566	2.60368	2.82321	2.89699	7.87179	7.92863	9.81296	10.5869	9.58568	9.74165	6	6	3.171	1.29e-08		GINS complex subunit 2 (Psf2 homolog)	Homo sapiens GINS complex subunit 2 (Psf2 homolog) (GINS2), mRNA [NM_016095]	TGTGTGATGGTGCAAGGAATGGATTCAGGATGTTGTTGGAGAAACAAGTTTGTGATTAGT
A_23_P111672	NM_152829	TES	Hs.592286	26136	hs|7q31.2	GO:0005634(nucleus)|GO:0005737(cytoplasm)|GO:0005925(focal adhesion)|GO:0008270(zinc ion binding)|GO:0008285(negative regulation of cell proliferation)|GO:0043234(protein complex)	1.25953	2.75299	2.82822	2.75816	2.51241	2.26009	7.05038	7.38466	7.55042	7.88654	7.6136	6.59455	6	6	3.169	0.000189		testis derived transcript (3 LIM domains)	Homo sapiens testis derived transcript (3 LIM domains) (TES), transcript variant 2, mRNA [NM_152829]	TTTTTTAATGTACCCTACCTTCAGTATTCTCTTTGTAAGTTGGTGACTTGCATCTGTGGC
A_23_P372988	NM_001134316	PRR22	Hs.631838	163154	hs|19p13.3		0.537943	0.229082	0.285525	0.293231	0.265425	0.325657	0.816971	1.12004	1.04998	0.948162	0.858707	1.15193	6	6	3.168	4.63e-05		proline rich 22	Homo sapiens proline rich 22 (PRR22), mRNA [NM_001134316]	CTGGACACCGTGTCCAACGTTGACTACTTCTTCAACTTCAAGGCGCTCGACGAGGAGCAG
A_21_P0000239	NR_002434	SNORD101		594837	hs|6q23.2		0.033842	0.127564	0.127026	0.123205	0.0836912	0.0219571	0.169158	0.178608	0.252154	0.215689	0.280022	0.272742	3	6	3.168	0.0129		small nucleolar RNA, C/D box 101	Homo sapiens small nucleolar RNA, C/D box 101 (SNORD101), small nucleolar RNA [NR_002434]	CTTTAATTGTCGGATACCCCTTCACTCCTTTTATGAGTGAAACATAAGAGTCTGACAAAC
A_23_P422933	NM_020809	ARHGAP20	Hs.6136	57569	hs|11q23.1	GO:0005096(GTPase activator activity)|GO:0005829(cytosol)|GO:0007264(small GTPase mediated signal transduction)|GO:0043547(positive regulation of GTPase activity)|GO:0051056(regulation of small GTPase mediated signal transduction)	0.122459	0.354068	0.45216	0.264928	0.432499	0.282738	0.989139	1.07749	1.02214	0.968561	0.804228	0.755381	5	6	3.167	0.00142		Rho GTPase activating protein 20	Homo sapiens Rho GTPase activating protein 20 (ARHGAP20), transcript variant 1, mRNA [NM_020809]	ACCATTCCTACTATCTGTGTTCCCTTAGATACTCCTGTAATTCTTAATGTGAATAGTTTG
A_32_P206698	NM_001826	CKS1B	Hs.374378	1163	hs|1q21.3	GO:0000079(regulation of cyclin-dependent protein kinase activity)|GO:0000082(G1/S transition of mitotic cell cycle)|GO:0000278(mitotic cell cycle)|GO:0005515(protein binding)|GO:0005654(nucleoplasm)|GO:0008283(cell proliferation)|GO:0016538(cyclin-dependent protein kinase regulator activity)|GO:0051301(cell division)	0.676621	2.55606	2.46092	3.42109	2.85095	2.09753	6.36005	7.74746	7.1783	7.88916	6.87819	4.57429	6	6	3.167	0.0034		CDC28 protein kinase regulatory subunit 1B	Homo sapiens CDC28 protein kinase regulatory subunit 1B (CKS1B), transcript variant 1, mRNA [NM_001826]	CAAACAAATTTACTATTCGGACAAATACGATGACGAGGAGTTTGAGTATCGACATGTCAT
A_32_P47754	NM_001286233	SLC2A14	Hs.655169	144195	hs|12p13.31	GO:0005355(glucose transmembrane transporter activity)|GO:0005634(nucleus)|GO:0007275(multicellular organismal development)|GO:0007283(spermatogenesis)|GO:0015758(glucose transport)|GO:0016021(integral to membrane)|GO:0030154(cell differentiation)|GO:0055085(transmembrane transport)	2.22313	1.58294	1.33566	1.18255	1.59451	1.63372	4.11342	4.61546	5.81684	5.45904	4.32998	5.53831	6	6	3.161	2.1e-06		solute carrier family 2 (facilitated glucose transporter), member 14	Homo sapiens solute carrier family 2 (facilitated glucose transporter), member 14 (SLC2A14), transcript variant 1, mRNA [NM_001286233]	TTCACGTCAACTTCTGGCTCCTCAGTTTGGCAGTAAGGCAGGGAAGTTGTTTTCCTATTT
A_23_P106016	NM_002742	PRKD1	Hs.508999	5587	hs|14q12	GO:0001525(angiogenesis)|GO:0001938(positive regulation of endothelial cell proliferation)|GO:0004674(protein serine/threonine kinase activity)|GO:0004697(protein kinase C activity)|GO:0005515(protein binding)|GO:0005524(ATP binding)|GO:0005634(nucleus)|GO:0005737(cytoplasm)|GO:0005802(trans-Golgi network)|GO:0005829(cytosol)|GO:0005886(plasma membrane)|GO:0005887(integral to plasma membrane)|GO:…	0.284629	0.453602	0.441683	0.386859	0.404272	0.370387	1.27582	1.35784	1.14714	1.28445	1.09932	1.16752	6	6	3.158	1.02e-06		protein kinase D1	Homo sapiens protein kinase D1 (PRKD1), mRNA [NM_002742]	CTGTTTGGTGTGTCCCATTGGTGTTGTCATTGTAAACAAACTCTTGAAGAGTCGATTATT
A_23_P748	NM_006147	IRF6	Hs.591415	3664	hs|1q32.2	GO:0000975(regulatory region DNA binding)|GO:0003677(DNA binding)|GO:0003700(sequence-specific DNA binding transcription factor activity)|GO:0005515(protein binding)|GO:0005634(nucleus)|GO:0005737(cytoplasm)|GO:0005829(cytosol)|GO:0006351(transcription, DNA-dependent)|GO:0007050(cell cycle arrest)|GO:0008285(negative regulation of cell proliferation)|GO:0019221(cytokine-mediated signaling pathway…	0.50761	0.469559	0.385157	0.340067	0.313194	0.342402	1.15144	1.17788	1.28575	1.2352	1.12743	1.36238	6	6	3.156	6.09e-06		interferon regulatory factor 6	Homo sapiens interferon regulatory factor 6 (IRF6), transcript variant 1, mRNA [NM_006147]	TCTTGGTTCAGGTCATTCCAGTAGTGGCTCGGATGATCTACGAGATGTTTTCTGGTGATT
A_24_P150874	NM_006572	GNA13	Hs.515018	10672	hs|17q24.1	GO:0001569(patterning of blood vessels)|GO:0001701(in utero embryonic development)|GO:0003924(GTPase activity)|GO:0004871(signal transducer activity)|GO:0005515(protein binding)|GO:0005525(GTP binding)|GO:0005634(nucleus)|GO:0005834(heterotrimeric G-protein complex)|GO:0005886(plasma membrane)|GO:0006184(GTP catabolic process)|GO:0006928(cellular component movement)|GO:0007165(signal transduction…	0.546848	0.885016	0.84125	0.863988	0.793965	0.735052	2.40785	2.48393	2.25468	2.58454	2.47619	2.31649	6	6	3.148	7.38e-06		guanine nucleotide binding protein (G protein), alpha 13	Homo sapiens guanine nucleotide binding protein (G protein), alpha 13 (GNA13), transcript variant 1, mRNA [NM_006572]	GTATATTTTGTAATAACCCCGTAGATACTGTACCTAACAAAACATGACTCGTATTAGCTC
A_23_P323751	NM_030919	FAM83D	Hs.726442	81610	hs|20q11.23	GO:0000922(spindle pole)|GO:0005737(cytoplasm)|GO:0007067(mitosis)	0.837826	1.26172	1.02302	1.14868	1.09308	0.980514	2.92051	3.35415	3.67505	3.27706	2.82514	3.86839	6	6	3.145	4.38e-08		family with sequence similarity 83, member D	Homo sapiens family with sequence similarity 83, member D (FAM83D), mRNA [NM_030919]	TGTTTTGTCATGTATATACCAGGTATTGGTTTTATGGTTTAAACACTATGGATACAGGGG
A_23_P155765	NM_002129	HMGB2	Hs.434953	3148	hs|4q34.1	GO:0000793(condensed chromosome)|GO:0001938(positive regulation of endothelial cell proliferation)|GO:0003677(DNA binding)|GO:0003684(damaged DNA binding)|GO:0003690(double-stranded DNA binding)|GO:0003697(single-stranded DNA binding)|GO:0003700(sequence-specific DNA binding transcription factor activity)|GO:0005515(protein binding)|GO:0005615(extracellular space)|GO:0005634(nucleus)|GO:0005654(n…	18.9895	16.3711	14.6459	12.1088	15.3908	15.3646	45.5878	43.5058	54.8787	54.8608	44.4788	47.3968	6	6	3.144	8.04e-08		high mobility group box 2	Homo sapiens high mobility group box 2 (HMGB2), transcript variant 1, mRNA [NM_002129]	TAAAAAATGCAGGTTGTAGCTTTTTGATGGGCTACTCATACAGTTAGATTTTACAGCTTC
A_23_P80902	NM_020242	KIF15	Hs.658939	56992	hs|3p21.31	GO:0003677(DNA binding)|GO:0003774(motor activity)|GO:0003777(microtubule motor activity)|GO:0005524(ATP binding)|GO:0005813(centrosome)|GO:0005819(spindle)|GO:0005829(cytosol)|GO:0005873(plus-end kinesin complex)|GO:0005874(microtubule)|GO:0007018(microtubule-based movement)|GO:0007067(mitosis)|GO:0007596(blood coagulation)|GO:0008017(microtubule binding)|GO:0008152(metabolic process)|GO:0008283…	1.19549	1.09459	1.25278	1.08405	1.1806	1.04625	3.14623	3.65924	3.44148	4.26172	3.14382	3.99334	6	6	3.144	6.26e-08		kinesin family member 15	Homo sapiens kinesin family member 15 (KIF15), mRNA [NM_020242]	ATTCTGCATCCATATACACCCTGTGACAGTCAGCAGTCTGCTATTAAGTGGCCTACTTCA
A_33_P3342081	NM_001198	PRDM1	Hs.436023	639	hs|6q21	GO:0000122(negative regulation of transcription from RNA polymerase II promoter)|GO:0001893(maternal placenta development)|GO:0003700(sequence-specific DNA binding transcription factor activity)|GO:0005515(protein binding)|GO:0005634(nucleus)|GO:0005737(cytoplasm)|GO:0006351(transcription, DNA-dependent)|GO:0007281(germ cell development)|GO:0008168(methyltransferase activity)|GO:0010628(positive …	0.388186	0.280593	0.364839	0.337475	0.397086	0.343454	0.72216	1.21789	1.10338	1.23641	1.05649	1.38827	6	6	3.142	5.66e-06		PR domain containing 1, with ZNF domain	Homo sapiens PR domain containing 1, with ZNF domain (PRDM1), transcript variant 1, mRNA [NM_001198]	CCTCTACTCAAAGTTAAAACTGACCAAAGTTACTGGCTTTTTACTTTGCTAGAACAACAA
A_24_P41021	NM_203301	FBXO33	Hs.146632	254170	hs|14q21.1	GO:0005515(protein binding)|GO:0016567(protein ubiquitination)	1.12116	0.31709	0.76724	0.600005	0.566941	0.910542	2.26893	2.19886	1.38766	2.18213	2.26717	2.35698	6	6	3.138	0.000693		F-box protein 33	Homo sapiens F-box protein 33 (FBXO33), mRNA [NM_203301]	TAAAAACACAGAGTTGTAAATACACATGCTTGCAAAAACATTAGTCGTGAAATCCCTAGC
A_23_P88095	NM_014832	TBC1D4	Hs.210891	9882	hs|13q22.2	GO:0005097(Rab GTPase activator activity)|GO:0005737(cytoplasm)|GO:0016192(vesicle-mediated transport)|GO:0030659(cytoplasmic vesicle membrane)|GO:0031339(negative regulation of vesicle fusion)|GO:0032851(positive regulation of Rab GTPase activity)|GO:0032869(cellular response to insulin stimulus)|GO:0061024(membrane organization)|GO:0070062(extracellular vesicular exosome)	1.29267	2.86073	3.33419	3.97168	2.71038	2.61483	7.81266	8.21323	7.78049	9.46272	8.84809	7.87333	6	6	3.134	0.000593		TBC1 domain family, member 4	Homo sapiens TBC1 domain family, member 4 (TBC1D4), transcript variant 1, mRNA [NM_014832]	ATGACATTCACGCATGCTGGGTATAGGCAAGGAAAGTAATTTTCAAAGTACATTTGCAGT
A_24_P183094	NM_024524	ATP13A3	Hs.529609	79572	hs|3q29	GO:0005524(ATP binding)|GO:0006200(ATP catabolic process)|GO:0006812(cation transport)|GO:0016021(integral to membrane)|GO:0019829(cation-transporting ATPase activity)|GO:0046872(metal ion binding)	28.9465	20.5437	22.6587	22.189	19.436	21.5281	69.8613	77.7179	57.2174	75.1247	68.2938	74.1763	6	6	3.133	3.63e-08		ATPase type 13A3	Homo sapiens ATPase type 13A3 (ATP13A3), mRNA [NM_024524]	AAATTGTATTGCTGCTCAAGAATGGTACCCTCTTGTCAAAAAGGCATACATTCATAATTG
A_21_P0011842	NM_001135650	EEF1E1	Hs.745033	9521	hs|6p24.3	GO:0005515(protein binding)|GO:0005634(nucleus)|GO:0005737(cytoplasm)|GO:0005829(cytosol)|GO:0006418(tRNA aminoacylation for protein translation)|GO:0008285(negative regulation of cell proliferation)|GO:0010467(gene expression)|GO:0043065(positive regulation of apoptotic process)|GO:0043517(positive regulation of DNA damage response, signal transduction by p53 class mediator)|GO:0070062(extracell…	3.323	7.78013	6.73506	7.88889	6.88222	5.75596	16.3975	19.3835	23.0199	19.5783	19.546	18.3816	6	6	3.133	0.000157		eukaryotic translation elongation factor 1 epsilon 1	Homo sapiens eukaryotic translation elongation factor 1 epsilon 1 (EEF1E1), transcript variant 2, mRNA [NM_001135650]	AACAAACAATGGTCCAAGTCTAACAGGATTGACTACTATAGCAGCTCATCTAGTCAAGCA
A_23_P259071	NM_001657	AREG	Hs.270833	374	hs|4q13.3	GO:0005125(cytokine activity)|GO:0005515(protein binding)|GO:0005615(extracellular space)|GO:0007173(epidermal growth factor receptor signaling pathway)|GO:0007186(G-protein coupled receptor signaling pathway)|GO:0007267(cell-cell signaling)|GO:0008083(growth factor activity)|GO:0008283(cell proliferation)|GO:0009986(cell surface)|GO:0016021(integral to membrane)|GO:0045740(positive regulation of…	0.145775	0.115039	0.0927758	0.0770004	0.0369125	0.0661596	0.185934	0.251028	0.356048	0.368876	0.141811	0.312843	0	5	3.124	0.0012		amphiregulin	Homo sapiens amphiregulin (AREG), mRNA [NM_001657]	TGAGTCGGTCCTCTTTCCAGTGGATCATAAGACAATGGACCCTTTTTGTTATGATGGTTT
A_23_P379614	NM_007280	OIP5	Hs.661645	11339	hs|15q15.1	GO:0000775(chromosome, centromeric region)|GO:0000785(chromatin)|GO:0005515(protein binding)|GO:0005634(nucleus)|GO:0005654(nucleoplasm)|GO:0005730(nucleolus)|GO:0005737(cytoplasm)|GO:0006334(nucleosome assembly)|GO:0007067(mitosis)|GO:0007154(cell communication)|GO:0010369(chromocenter)|GO:0015030(Cajal body)|GO:0034080(CenH3-containing nucleosome assembly at centromere)	1.33338	1.40579	1.29191	0.998816	1.84504	1.21274	3.95829	4.44732	4.43452	4.65296	3.52405	3.90396	6	6	3.121	2.93e-06		Opa interacting protein 5	Homo sapiens Opa interacting protein 5 (OIP5), mRNA [NM_007280]	TGGTTGGTCTGAAAATAGAGTTGGGCTTAATGTTGACTTCTATTACTCCTGCATGGAGCA
A_23_P129075	NM_024908	WDR76	Hs.250154	79968	hs|15q15.3		0.299165	0.954877	1.01017	0.519068	0.943726	0.773954	2.19517	1.8242	2.33306	2.55237	2.42513	1.7271	6	6	3.115	0.00141		WD repeat domain 76	Homo sapiens WD repeat domain 76 (WDR76), transcript variant 1, mRNA [NM_024908]	TGTTCAAATTGACCACTGTCTAAGGAGCCTAGTAATCGGCGTGCCTTAGTGTGTTTATGT
A_24_P107859	NM_152594	SPRED1	Hs.525781	161742	hs|15q14	GO:0000188(inactivation of MAPK activity)|GO:0005173(stem cell factor receptor binding)|GO:0005515(protein binding)|GO:0005634(nucleus)|GO:0005730(nucleolus)|GO:0005737(cytoplasm)|GO:0005901(caveola)|GO:0007275(multicellular organismal development)|GO:0010801(negative regulation of peptidyl-threonine phosphorylation)|GO:0010923(negative regulation of phosphatase activity)|GO:0019901(protein kinas…	1.23459	2.02637	1.96766	1.62122	1.58726	1.74994	5.44505	5.62439	4.69171	5.59608	5.06002	4.88533	6	6	3.105	2.82e-06		sprouty-related, EVH1 domain containing 1	Homo sapiens sprouty-related, EVH1 domain containing 1 (SPRED1), mRNA [NM_152594]	TACTGTTTATATATTTGAATGCTGCTACAACAGATGATCTTCATCCCTGAAGTTTTCAGC
A_23_P19712	NM_015895	GMNN	Hs.234896	51053	hs|6p22.3	GO:0000278(mitotic cell cycle)|GO:0003714(transcription corepressor activity)|GO:0005515(protein binding)|GO:0005634(nucleus)|GO:0005654(nucleoplasm)|GO:0005737(cytoplasm)|GO:0005829(cytosol)|GO:0006461(protein complex assembly)|GO:0008156(negative regulation of DNA replication)|GO:0009887(organ morphogenesis)|GO:0042826(histone deacetylase binding)|GO:0045786(negative regulation of cell cycle)|G…	5.19538	4.97955	4.67754	4.50377	4.90334	5.39548	14.354	15.6851	15.4261	17.2405	14.8473	14.4621	6	6	3.102	5.2e-11		geminin, DNA replication inhibitor	Homo sapiens geminin, DNA replication inhibitor (GMNN), transcript variant 1, mRNA [NM_015895]	CATAATGCCAACTCTGGAATCAAATTTCCTTGTTTGAATCCTGGGACCCTATTGCATTAA
A_21_P0014306	ENST00000567216	CAPN15	Hs.632219	6650	hs|16p13.3	GO:0003700(sequence-specific DNA binding transcription factor activity)|GO:0004198(calcium-dependent cysteine-type endopeptidase activity)|GO:0005737(cytoplasm)|GO:0006355(regulation of transcription, DNA-dependent)|GO:0006508(proteolysis)|GO:0008233(peptidase activity)|GO:0008234(cysteine-type peptidase activity)|GO:0008270(zinc ion binding)	0.633992	0.267616	0.424947	0.292479	0.364572	0.295982	1.16821	0.987794	1.35333	0.997313	1.06985	1.19515	6	6	3.093	0.000143		calpain 15	calpain 15 [Source:HGNC Symbol;Acc:11182] [ENST00000567216]	GATAAAGCAAAAGCGTGTGATCTCTTTTCTCACCAAGGAATAAAACGTCTCTGAATACCA
A_33_P3382412	NM_001277120	ZNF468	Hs.467223	90333	hs|19q13.41	GO:0003677(DNA binding)|GO:0005634(nucleus)|GO:0006351(transcription, DNA-dependent)|GO:0006355(regulation of transcription, DNA-dependent)|GO:0046872(metal ion binding)	0.431292	1.0286	1.00469	0.993515	1.01455	0.941441	2.25701	2.23995	2.94805	3.05669	2.73024	2.97439	6	6	3.093	0.000185		zinc finger protein 468	Homo sapiens zinc finger protein 468 (ZNF468), transcript variant 1, mRNA [NM_001277120]	AGCCTAGCCAACAGATGGGAGCTACTTTTCCCAGCCTTTATTTTCTTTTTCTTGTTTTTT
A_23_P153320	NM_000201	ICAM1	Hs.643447	3383	hs|19p13.2	GO:0001541(ovarian follicle development)|GO:0001618(viral receptor activity)|GO:0001772(immunological synapse)|GO:0001910(regulation of leukocyte mediated cytotoxicity)|GO:0001975(response to amphetamine)|GO:0002291(T cell activation via T cell receptor contact with antigen bound to MHC molecule on antigen presenting cell)|GO:0002457(T cell antigen processing and presentation)|GO:0002693(positive…	2.14611	1.82311	1.94816	2.20567	1.79374	1.67147	5.84028	5.80229	6.72523	6.53702	5.51973	5.30802	6	6	3.087	3.97e-09		intercellular adhesion molecule 1	Homo sapiens intercellular adhesion molecule 1 (ICAM1), mRNA [NM_000201]	GAAATACTGAAACTTGCTGCCTATTGGGTATGCTGAGGCCCACAGACTTACAGAAGAAGT
A_23_P165521	NM_003162	STRN	Hs.127486	6801	hs|2p22.2	GO:0000159(protein phosphatase type 2A complex)|GO:0005515(protein binding)|GO:0005516(calmodulin binding)|GO:0005737(cytoplasm)|GO:0005923(tight junction)|GO:0007626(locomotory behavior)|GO:0008285(negative regulation of cell proliferation)|GO:0014069(postsynaptic density)|GO:0016020(membrane)|GO:0016055(Wnt receptor signaling pathway)|GO:0016358(dendrite development)|GO:0030331(estrogen recepto…	0.0395826	0.159157	0.0853642	0.09186	0.0868745	0.113998	0.281381	0.224916	0.34821	0.219568	0.269524	0.32279	1	5	3.084	0.00105		striatin, calmodulin binding protein	Homo sapiens striatin, calmodulin binding protein (STRN), mRNA [NM_003162]	CTGACGCACTGGCTAAAGTCTTTGTATGACGCAATGCATCATCTTCACCTTCTAGCTGTT
A_21_P0000056	NM_001165030	TMEM41B	Hs.594563	440026	hs|11p15.4	GO:0007399(nervous system development)|GO:0016021(integral to membrane)	0.0346876	0.219093	0.280233	0.406242	0.18933	0.252358	0.409541	0.531932	0.542089	0.867309	0.612781	0.566973	5	6	3.084	0.0227		transmembrane protein 41B	Homo sapiens transmembrane protein 41B (TMEM41B), transcript variant 2, mRNA [NM_001165030]	GCTCTAGGAAAAGTTTTATCCAAATACAAGGACACCTTTTATGTTCAAGTACTTGTAGCT
A_23_P160466	NM_006996	SLC19A2	Hs.30246	10560	hs|1q24.2	GO:0005886(plasma membrane)|GO:0006766(vitamin metabolic process)|GO:0006767(water-soluble vitamin metabolic process)|GO:0008517(folic acid transporter activity)|GO:0015234(thiamine transmembrane transporter activity)|GO:0015403(thiamine uptake transmembrane transporter activity)|GO:0015884(folic acid transport)|GO:0015888(thiamine transport)|GO:0016021(integral to membrane)|GO:0042723(thiamine-c…	1.16756	1.37141	1.33285	1.48066	1.32272	1.38221	4.18724	4.34098	3.72713	4.49323	4.06353	4.00822	6	6	3.083	1.87e-10		solute carrier family 19 (thiamine transporter), member 2	Homo sapiens solute carrier family 19 (thiamine transporter), member 2 (SLC19A2), mRNA [NM_006996]	CTTGGTATGTGGCCATATTTATAGAATGCTGAACTCAATGTGCAAGTTGTACTGTATGCA
A_33_P3269728	NM_001286721	ANKRD10	Hs.525163	55608	hs|13q34		0.383051	0.553111	0.616937	0.601994	0.560627	0.527745	1.62947	1.28156	1.89217	1.75614	1.74893	1.64564	6	6	3.082	3.28e-07		ankyrin repeat domain 10	Homo sapiens ankyrin repeat domain 10 (ANKRD10), transcript variant 2, mRNA [NM_001286721]	AAACTCCCATTCACAAGGCAGCTCGCTCTGGGAGCCTAGAATGCATCAGTGCCCTTGTGG
A_23_P215980	NM_183009	KIAA1429	Hs.202238	25962	hs|8q22.1	GO:0005634(nucleus)|GO:0006397(mRNA processing)|GO:0008380(RNA splicing)	0.0305693	0.222675	0.21945	0.213006	0.11787	0.129181	0.323931	0.403417	0.461938	0.329639	0.495654	0.414061	5	6	3.073	0.0145		KIAA1429	Homo sapiens KIAA1429 (KIAA1429), transcript variant 2, mRNA [NM_183009]	AAATGGAATCTTGCCGTTATTCAGCTTTTTTCTGCTGAAGGAATGGACACGTTTATTCGA
A_33_P3362353	NM_001256197	ARAF	Hs.446641	369	hs|Xp11.23	GO:0004672(protein kinase activity)|GO:0004674(protein serine/threonine kinase activity)|GO:0005057(receptor signaling protein activity)|GO:0005515(protein binding)|GO:0005524(ATP binding)|GO:0005575(cellular_component)|GO:0005739(mitochondrion)|GO:0006464(cellular protein modification process)|GO:0006468(protein phosphorylation)|GO:0032006(regulation of TOR signaling cascade)|GO:0032434(regulati…	0.232094	0.695898	0.451343	0.907569	0.628692	0.486404	1.4783	1.49848	2.13444	1.91386	1.4535	1.29022	6	6	3.071	0.00121		v-raf murine sarcoma 3611 viral oncogene homolog	Homo sapiens v-raf murine sarcoma 3611 viral oncogene homolog (ARAF), transcript variant 3, mRNA [NM_001256197]	GAGTTAAGACATGTTCAGTGCCTAGAACAGGATCTGGTACAGTGTAAATAATCAATTTTT
A_21_P0000022	NM_001159491	BRI3	Hs.567438	25798	hs|7q21.3	GO:0016021(integral to membrane)	0.408162	0.3374	0.400103	0.26362	0.370637	0.36336	0.977853	0.929854	1.15488	1.10612	1.31553	1.07063	6	6	3.069	1.66e-07		brain protein I3	Homo sapiens brain protein I3 (BRI3), transcript variant 2, mRNA [NM_001159491]	TGTGGCTGTGATAAGGGCAGGCAAAGCGTCTTAGCACTCTACAGCTCTGGCGTGGTTGGA
A_33_P3238976	NM_020810	TRMT5	Hs.380159	57570	hs|14q23.1	GO:0005634(nucleus)|GO:0005759(mitochondrial matrix)|GO:0030488(tRNA methylation)|GO:0052906(tRNA (guanine(37)-N(1))-methyltransferase activity)	7.10173	9.91189	11.9468	12.7414	11.4838	10.5146	24.482	29.8984	43.7211	28.9661	35.3449	32.1993	6	6	3.057	2.51e-06		tRNA methyltransferase 5	Homo sapiens tRNA methyltransferase 5 (TRMT5), mRNA [NM_020810]	ATAAAGCCAAGGTGAAGGATGAATCACAGAGAAGATCTGCGAGGTTGTCTGCTAAACCTG
A_23_P117852	NM_014736	KIAA0101	Hs.81892	9768	hs|15q22.31	GO:0003682(chromatin binding)|GO:0005515(protein binding)|GO:0005634(nucleus)|GO:0005737(cytoplasm)|GO:0006260(DNA replication)|GO:0006974(response to DNA damage stimulus)|GO:0009411(response to UV)|GO:0019985(translesion synthesis)|GO:0048471(perinuclear region of cytoplasm)|GO:0051297(centrosome organization)|GO:0051726(regulation of cell cycle)	7.91202	7.835	7.34236	6.3472	7.69599	7.73001	24.3806	27.0724	21.6013	21.8401	21.5388	20.7816	6	6	3.054	2.25e-09		KIAA0101	Homo sapiens KIAA0101 (KIAA0101), transcript variant 1, mRNA [NM_014736]	TACTGCTGCCATTTTTATTGGTGTTTGATTATTGGAATGGTGCCATATTGTCACTCCTTC
A_23_P151405	NM_018204	CKAP2	Hs.444028	26586	hs|13q14.3	GO:0000281(cytokinesis after mitosis)|GO:0000922(spindle pole)|GO:0005813(centrosome)|GO:0005881(cytoplasmic microtubule)|GO:0006915(apoptotic process)|GO:0007026(negative regulation of microtubule depolymerization)|GO:0045944(positive regulation of transcription from RNA polymerase II promoter)	1.54574	1.07647	1.277	1.5155	1.68916	1.98709	4.18583	5.28713	3.70835	5.32772	3.68668	5.42504	6	6	3.053	2.57e-06		cytoskeleton associated protein 2	Homo sapiens cytoskeleton associated protein 2 (CKAP2), transcript variant 1, mRNA [NM_018204]	TCTTTTCTATTTATTGACTTCTCATGTTCTAGAGAGTAGGACTTTTATTCCGTGTACCTG
A_32_P186474	NM_013277	RACGAP1	Hs.505469	29127	hs|12q13.12	GO:0000281(cytokinesis after mitosis)|GO:0000915(cytokinesis, actomyosin contractile ring assembly)|GO:0001669(acrosomal vesicle)|GO:0005096(GTPase activator activity)|GO:0005515(protein binding)|GO:0005547(phosphatidylinositol-3,4,5-trisphosphate binding)|GO:0005634(nucleus)|GO:0005730(nucleolus)|GO:0005829(cytosol)|GO:0005874(microtubule)|GO:0007018(microtubule-based movement)|GO:0007108(cytoki…	1.07121	0.438855	0.512503	0.822059	0.538065	0.806181	1.34121	3.17229	1.11786	2.88363	2.38206	2.12896	6	6	3.053	0.000569		Rac GTPase activating protein 1	Homo sapiens Rac GTPase activating protein 1 (RACGAP1), transcript variant 1, mRNA [NM_013277]	AAATTATTCTTAATGTCTGTAAAAACGATTTTCTTCTGTAGAATGTTTGACTTCATATTG
A_32_P230547	NM_033407	DOCK7	Hs.744927	85440	hs|1p31.3	GO:0000226(microtubule cytoskeleton organization)|GO:0005085(guanyl-nucleotide exchange factor activity)|GO:0007264(small GTPase mediated signal transduction)|GO:0007409(axonogenesis)|GO:0008180(signalosome)|GO:0030424(axon)|GO:0030426(growth cone)|GO:0031175(neuron projection development)|GO:0032863(activation of Rac GTPase activity)|GO:0033138(positive regulation of peptidyl-serine phosphorylat…	0.503242	1.42322	1.51321	2.15163	1.77248	1.4571	4.71032	4.38084	3.54982	4.9818	3.66162	3.60869	6	6	3.047	0.00225		dedicator of cytokinesis 7	Homo sapiens dedicator of cytokinesis 7 (DOCK7), transcript variant 2, mRNA [NM_033407]	GTGACCCAAAGCTCTTCAGACATCATAATAAACTGCGACTCTGCTTTAAAGATTTTACTA
A_33_P3289356	NM_001779	CD58	Hs.34341	965	hs|1p13.1	GO:0005102(receptor binding)|GO:0005515(protein binding)|GO:0005886(plasma membrane)|GO:0005887(integral to plasma membrane)|GO:0007155(cell adhesion)|GO:0007596(blood coagulation)|GO:0009986(cell surface)|GO:0016337(cell-cell adhesion)|GO:0031225(anchored to membrane)|GO:0034113(heterotypic cell-cell adhesion)|GO:0050900(leukocyte migration)|GO:0070062(extracellular vesicular exosome)|GO:0071346…	1.19546	2.27844	1.74347	2.21435	1.95486	1.51133	5.20217	5.58941	5.94679	6.54214	4.88594	4.48188	6	6	3.045	1.26e-05		CD58 molecule	Homo sapiens CD58 molecule (CD58), transcript variant 1, mRNA [NM_001779]	GCACTTATACCCATACCATTAGCAGTAATTACAACATGTATTGTGCTGTATATGAATGGT
A_33_P3287348	NM_001293070	CHN2	Hs.654611	1124	hs|7p14.3	GO:0005070(SH3/SH2 adaptor activity)|GO:0005096(GTPase activator activity)|GO:0005515(protein binding)|GO:0005829(cytosol)|GO:0007264(small GTPase mediated signal transduction)|GO:0009967(positive regulation of signal transduction)|GO:0016020(membrane)|GO:0043547(positive regulation of GTPase activity)|GO:0046872(metal ion binding)|GO:0051056(regulation of small GTPase mediated signal transductio…	1.35894	0.886113	1.00633	0.781818	0.90731	0.941735	3.10832	2.97005	2.53896	3.06349	2.45817	3.6525	6	6	3.045	7.32e-07		chimerin 2	Homo sapiens chimerin 2 (CHN2), transcript variant 4, mRNA [NM_001293070]	CTCCTCCCAACTGTACAGATTTGTTTGTTGTAGTTTATGTACTTCTTGATACTGTCAAAA
A_23_P34877	NM_022768	RBM15	Hs.435947	64783	hs|1p13.3	GO:0000166(nucleotide binding)|GO:0001569(patterning of blood vessels)|GO:0005515(protein binding)|GO:0005634(nucleus)|GO:0005730(nucleolus)|GO:0007221(positive regulation of transcription of Notch receptor target)|GO:0016032(viral reproduction)|GO:0031965(nuclear membrane)|GO:0045638(negative regulation of myeloid cell differentiation)|GO:0045892(negative regulation of transcription, DNA-depende…	0.242982	0.187545	0.247259	0.237153	0.20674	0.163971	0.554508	0.635273	0.592133	0.764523	0.637092	0.706561	6	6	3.042	2.89e-07		RNA binding motif protein 15	Homo sapiens RNA binding motif protein 15 (RBM15), transcript variant 1, mRNA [NM_022768]	TGCATCAGACACTGCCACTTCTACTCAGAGGCCACTTAGGAACCTTGTGTCCTATTTAAA
A_32_P34876	NM_020212	WDR93	Hs.177557	56964	hs|15q26.1	GO:0016651(oxidoreductase activity, acting on NADH or NADPH)|GO:0022900(electron transport chain)	0.190789	0.156179	0.158895	0.230936	0.16525	0.142574	1.07673	0.193498	0.794622	0.290956	1.33137	0.318371	6	6	3.042	0.0176		WD repeat domain 93	Homo sapiens WD repeat domain 93 (WDR93), transcript variant 1, mRNA [NM_020212]	GGCCTGCCCACTCCTGGAAAATATCTCAAAAAATTGTACCATTCCTCAAAGGGACTTGGA
A_23_P127186	NM_206862	TACC2	Hs.501252	10579	hs|10q26.13	GO:0005634(nucleus)|GO:0005730(nucleolus)|GO:0005737(cytoplasm)|GO:0005794(Golgi apparatus)|GO:0005815(microtubule organizing center)|GO:0019904(protein domain specific binding)|GO:0021987(cerebral cortex development)|GO:0022008(neurogenesis)|GO:0022027(interkinetic nuclear migration)|GO:0030953(astral microtubule organization)|GO:0032886(regulation of microtubule-based process)|GO:0035257(nuclea…	5.64906	3.86183	3.46878	4.45926	5.07584	4.73127	12.0905	15.5503	11.8379	15.304	12.0991	15.3944	6	6	3.036	5.07e-07		transforming, acidic coiled-coil containing protein 2	Homo sapiens transforming, acidic coiled-coil containing protein 2 (TACC2), transcript variant 1, mRNA [NM_206862]	TTGCATTTTCCTAGTATAATTCATAGCAAGTTGACCTCAGAGTTCCTGTATCAGGGAGAT
A_33_P3384452	NM_007111	TFDP1	Hs.79353	7027	hs|13q34	GO:0000082(G1/S transition of mitotic cell cycle)|GO:0000278(mitotic cell cycle)|GO:0003677(DNA binding)|GO:0003700(sequence-specific DNA binding transcription factor activity)|GO:0003713(transcription coactivator activity)|GO:0005515(protein binding)|GO:0005654(nucleoplasm)|GO:0005667(transcription factor complex)|GO:0006351(transcription, DNA-dependent)|GO:0006357(regulation of transcription fr…	2.56028	5.18611	4.74314	3.9501	3.96872	3.38232	11.8462	11.2896	11.2256	14.6544	10.7027	11.0893	6	6	3.035	2.47e-05		transcription factor Dp-1	Homo sapiens transcription factor Dp-1 (TFDP1), transcript variant 1, mRNA [NM_007111]	GTTTATTGCTTATGGTAAAATTTGCCTGATTTCTTACAGGCAGCGTTTGGAAACCTTTTA
A_33_P3360665	NM_001105	ACVR1	Hs.470316	90	hs|2q24.1	GO:0000082(G1/S transition of mitotic cell cycle)|GO:0001569(patterning of blood vessels)|GO:0001655(urogenital system development)|GO:0001701(in utero embryonic development)|GO:0001702(gastrulation with mouth forming second)|GO:0001707(mesoderm formation)|GO:0001755(neural crest cell migration)|GO:0002526(acute inflammatory response)|GO:0003143(embryonic heart tube morphogenesis)|GO:0003183(mitr…	0.805603	2.06458	1.94762	2.17647	1.62488	1.46353	4.0754	4.86693	5.66118	4.92759	5.52684	4.27182	6	6	3.033	0.000363		activin A receptor, type I	Homo sapiens activin A receptor, type I (ACVR1), transcript variant 1, mRNA [NM_001105]	ATAGTGTCAAGAAGGAAGATTTGACGTTGTTGTCATTGTCCAGCTGGGACCTAATGCTGG
A_23_P30634	NM_021813	BACH2	Hs.269764	60468	hs|6q15	GO:0003700(sequence-specific DNA binding transcription factor activity)|GO:0005634(nucleus)|GO:0005737(cytoplasm)|GO:0006351(transcription, DNA-dependent)|GO:0006355(regulation of transcription, DNA-dependent)|GO:0043565(sequence-specific DNA binding)	0.207368	0.192674	0.192082	0.172839	0.144101	0.1649	0.485994	0.479209	0.550599	0.659191	0.569003	0.5069	6	6	3.03	3.33e-08		BTB and CNC homology 1, basic leucine zipper transcription factor 2	Homo sapiens BTB and CNC homology 1, basic leucine zipper transcription factor 2 (BACH2), transcript variant 1, mRNA [NM_021813]	CCCTCTGTACCTCTCATAACTGGTCAACGACTGTAACAGGTTACATCAGGTGTTTTTCTA
A_23_P131866	NM_198433	AURKA	Hs.250822	6790	hs|20q13.2	GO:0000086(G2/M transition of mitotic cell cycle)|GO:0000278(mitotic cell cycle)|GO:0004672(protein kinase activity)|GO:0004674(protein serine/threonine kinase activity)|GO:0004712(protein serine/threonine/tyrosine kinase activity)|GO:0005515(protein binding)|GO:0005524(ATP binding)|GO:0005634(nucleus)|GO:0005813(centrosome)|GO:0005819(spindle)|GO:0005829(cytosol)|GO:0005876(spindle microtubule)|…	2.11265	2.56446	2.96607	2.69101	2.80471	2.59854	6.82956	6.92236	9.04328	9.64974	8.0913	7.2532	6	6	3.026	7.47e-08		aurora kinase A	Homo sapiens aurora kinase A (AURKA), transcript variant 1, mRNA [NM_198433]	CTGCCATATAACCTGACAGGAACATGCTACTGAAGTTTATTTTACCATTGACTGCTGCCC
A_24_P943922	NM_020925	CACHD1	Hs.443891	57685	hs|1p31.3	GO:0006816(calcium ion transport)|GO:0016021(integral to membrane)	0.105654	0.286739	0.28546	0.252028	0.263939	0.270937	0.569467	0.816709	0.672995	0.856895	0.575112	0.771576	5	6	3.023	0.000387		cache domain containing 1	Homo sapiens cache domain containing 1 (CACHD1), transcript variant 1, mRNA [NM_020925]	CCCACTCCACAAAATAGGAAAATGAAGAAATCTTTCTCTCTGACTTGTTTACATCATTTC
A_23_P36531	NM_004616	TSPAN8	Hs.170563	7103	hs|12q21.1	GO:0004871(signal transducer activity)|GO:0005764(lysosome)|GO:0006486(protein glycosylation)|GO:0007165(signal transduction)|GO:0016021(integral to membrane)|GO:0030195(negative regulation of blood coagulation)	0.309588	0.468964	0.348797	0.434755	0.419128	0.529495	0.882999	1.38513	1.43492	1.33215	1.22258	1.28928	6	6	3.017	1.38e-06		tetraspanin 8	Homo sapiens tetraspanin 8 (TSPAN8), mRNA [NM_004616]	GCTGATTGGGGAAATAATTTTCAACACTATCCTGAATTATGTGCCTGTCTAGATAAGCAG
A_33_P3274397	NM_001145414	CHM	Hs.496449	1121	hs|Xq21.2	GO:0001568(blood vessel development)|GO:0004663(Rab geranylgeranyltransferase activity)|GO:0005096(GTPase activator activity)|GO:0005829(cytosol)|GO:0005968(Rab-protein geranylgeranyltransferase complex)|GO:0006612(protein targeting to membrane)|GO:0007601(visual perception)|GO:0017137(Rab GTPase binding)|GO:0018344(protein geranylgeranylation)|GO:0043547(positive regulation of GTPase activity)|G…	0.280987	0.230364	0.152188	0.187668	0.140946	0.227536	0.466148	0.608404	0.516758	0.756863	0.542904	0.741307	5	6	3.016	1.59e-05		choroideremia (Rab escort protein 1)	Homo sapiens choroideremia (Rab escort protein 1) (CHM), transcript variant 2, mRNA [NM_001145414]	CTGCATTGTACTGAACGTTGTTTCCCTTTTTCTGGTATAATATTAAAGCAGGATGAAAAC
A_23_P47885	NM_153377	LRIG3	Hs.253736	121227	hs|12q14.1	GO:0005615(extracellular space)|GO:0005886(plasma membrane)|GO:0007275(multicellular organismal development)|GO:0016021(integral to membrane)|GO:0030659(cytoplasmic vesicle membrane)	0.590412	0.932363	0.963128	1.07021	0.920743	1.11494	2.52486	2.66657	2.57707	3.65748	2.18179	3.15852	6	6	3.015	4.4e-06		leucine-rich repeats and immunoglobulin-like domains 3	Homo sapiens leucine-rich repeats and immunoglobulin-like domains 3 (LRIG3), transcript variant 2, mRNA [NM_153377]	ACACATAGACTGAATGAGACCAAAGGAAAAGCTTAACATACTACCTCAAGTGAACTTTTA
A_33_P3327165	NM_206886	CCDC18	Hs.745125	343099	hs|1p22.1		0.748005	0.539095	0.724193	0.404627	0.52838	0.856311	1.81794	2.42452	1.54368	2.1835	1.4796	1.81137	6	6	3.011	2.51e-05		coiled-coil domain containing 18	Homo sapiens coiled-coil domain containing 18 (CCDC18), mRNA [NM_206886]	GAACCATGCAAAGTGGAAGATTTCTGCTGACTCTCAAAAGTCTTCTGTTCAGCAACTAAA
A_23_P166280	ENST00000407780	ICOSLG		23308	hs|21q22.3	GO:0005102(receptor binding)|GO:0005886(plasma membrane)|GO:0005887(integral to plasma membrane)|GO:0006952(defense response)|GO:0006972(hyperosmotic response)|GO:0007165(signal transduction)|GO:0009897(external side of plasma membrane)|GO:0016021(integral to membrane)|GO:0031295(T cell costimulation)|GO:0042104(positive regulation of activated T cell proliferation)|GO:0042110(T cell activation)|…	1.27824	0.891651	0.842891	0.911855	0.834807	0.850336	2.75092	2.64875	2.83126	2.94534	2.4833	3.06773	6	6	3.01	1.27e-06		inducible T-cell co-stimulator ligand	inducible T-cell co-stimulator ligand [Source:HGNC Symbol;Acc:17087] [ENST00000407780]	CTCAGGGGAGTTCTCAGCTTGGACCCTTATCTCCCCAGAATCCTGGAACCTGCTCCTTCT
A_24_P116017	NM_002813	PSMD9	Hs.131151	5715	hs|12q24.31	GO:0000082(G1/S transition of mitotic cell cycle)|GO:0000209(protein polyubiquitination)|GO:0000278(mitotic cell cycle)|GO:0002474(antigen processing and presentation of peptide antigen via MHC class I)|GO:0002479(antigen processing and presentation of exogenous peptide antigen via MHC class I, TAP-dependent)|GO:0003713(transcription coactivator activity)|GO:0005515(protein binding)|GO:0005634(nu…	0.0980709	0.197871	0.256754	0.272713	0.268715	0.183246	0.486914	0.600239	0.550507	0.734462	0.673222	0.624672	5	6	3.009	0.000504		proteasome (prosome, macropain) 26S subunit, non-ATPase, 9	Homo sapiens proteasome (prosome, macropain) 26S subunit, non-ATPase, 9 (PSMD9), transcript variant 1, mRNA [NM_002813]	TGAGATCAGCGCTATTTTGTAAACCGCTGAGGTATGGATAGGAACGAGTAGATCAGACCT
A_23_P77415	NM_182981	OSGIN1	Hs.128055	29948	hs|16q23.3	GO:0005575(cellular_component)|GO:0007275(multicellular organismal development)|GO:0008083(growth factor activity)|GO:0030154(cell differentiation)|GO:0030308(negative regulation of cell growth)	1.56076	1.52712	1.62096	1.5629	1.68725	1.5663	6.07845	4.2113	5.35323	3.79908	4.49833	5.04698	6	6	3.008	1.06e-05		oxidative stress induced growth inhibitor 1	Homo sapiens oxidative stress induced growth inhibitor 1 (OSGIN1), mRNA [NM_182981]	TGGTGTTCAACCAGCTGCCCAAGATGCTGTACCCCGAGTACCACAAGGTGCACCAGATGA
A_33_P3610768	AK124265	LOC100131490	Hs.718640	100131490	hs|12q21.33		0.675717	0.485708	0.314856	0.377886	0.429615	0.392732	1.20959	1.23802	1.60903	1.27849	1.16102	1.36202	6	6	3.007	3.37e-05		uncharacterized LOC100131490	Homo sapiens cDNA FLJ42271 fis, clone TKIDN2015788. [AK124265]	TTTGTTTGCCACTTTTAAAGGCCCAGCTCTGTTTGCTCTGATGTTCTTTTAGCCGAGGCT
A_33_P3296205	NM_183422	TSC22D1	Hs.436383	8848	hs|13q14.11	GO:0003700(sequence-specific DNA binding transcription factor activity)|GO:0005515(protein binding)|GO:0005634(nucleus)|GO:0005737(cytoplasm)|GO:0006355(regulation of transcription, DNA-dependent)|GO:0006366(transcription from RNA polymerase II promoter)|GO:0008284(positive regulation of cell proliferation)|GO:0043065(positive regulation of apoptotic process)|GO:0043066(negative regulation of apo…	15.2312	10.9527	9.58662	9.29311	10.6697	12.2614	35.3246	31.2779	32.2522	40.8156	32.113	30.79	6	6	3.007	1.18e-06		TSC22 domain family, member 1	Homo sapiens TSC22 domain family, member 1 (TSC22D1), transcript variant 1, mRNA [NM_183422]	CTACACAATTGTAAGGTGTCACTGTATTTAACTGTTGCACTTGTCAACTTTCAATAAAGC
A_23_P120227	NM_030915	LBH	Hs.567598	81606	hs|2p23.1	GO:0005634(nucleus)|GO:0005737(cytoplasm)|GO:0006351(transcription, DNA-dependent)|GO:0007275(multicellular organismal development)|GO:0010468(regulation of gene expression)|GO:0030193(regulation of blood coagulation)|GO:0045893(positive regulation of transcription, DNA-dependent)	1.76089	2.10739	2.09339	2.38731	2.12229	2.20206	5.39673	6.49753	6.48153	7.38757	6.34983	5.99723	6	6	3.006	4.09e-09		limb bud and heart development	Homo sapiens limb bud and heart development (LBH), mRNA [NM_030915]	CTTGTAAACTGCGTAACAAATCTACTTTGTGTATGTGTCTGTTTATGGGGGTGGTTTATT
A_23_P156970	NM_002402	MEST	Hs.270978	4232	hs|7q32.2	GO:0005783(endoplasmic reticulum)|GO:0005789(endoplasmic reticulum membrane)|GO:0007498(mesoderm development)|GO:0008152(metabolic process)|GO:0010883(regulation of lipid storage)|GO:0016021(integral to membrane)|GO:0016787(hydrolase activity)|GO:0032526(response to retinoic acid)|GO:0070062(extracellular vesicular exosome)	0.993774	0.953441	0.946583	1.07505	0.893531	0.859692	2.28904	2.74741	2.94755	3.56789	3.07105	2.66493	6	6	3.001	4.07e-07		mesoderm specific transcript	Homo sapiens mesoderm specific transcript (MEST), transcript variant 1, mRNA [NM_002402]	AAGGACCAATAGCATCTGTGCCAGAGATGTACTGTTATTAGCTGGGAAGACCAATTCTAA
A_24_P190168	NM_014573	TMEM97	Hs.199695	27346	hs|17q11.2	GO:0001558(regulation of cell growth)|GO:0005515(protein binding)|GO:0005764(lysosome)|GO:0005791(rough endoplasmic reticulum)|GO:0005886(plasma membrane)|GO:0016021(integral to membrane)|GO:0031965(nuclear membrane)|GO:0042632(cholesterol homeostasis)	1.66767	2.01682	2.07754	1.97003	1.9823	1.93057	5.18269	6.08152	5.79578	6.36609	5.3569	6.12219	6	6	2.997	3.69e-10		transmembrane protein 97	Homo sapiens transmembrane protein 97 (TMEM97), mRNA [NM_014573]	ATCTGGAAGTGTGCTAGTATGCTCCCTAGTGGATAACTTAATCTTTTAATACAGTTCCGT
A_23_P36397	NM_000785	CYP27B1	Hs.524528	1594	hs|12q14.1	GO:0004498(calcidiol 1-monooxygenase activity)|GO:0005506(iron ion binding)|GO:0005737(cytoplasm)|GO:0005739(mitochondrion)|GO:0005741(mitochondrial outer membrane)|GO:0006766(vitamin metabolic process)|GO:0006805(xenobiotic metabolic process)|GO:0006816(calcium ion transport)|GO:0008202(steroid metabolic process)|GO:0008285(negative regulation of cell proliferation)|GO:0010956(negative regulatio…	0.112968	0.120989	0.16616	0.16794	0.149629	0.156583	0.36673	0.413828	0.534406	0.464745	0.328006	0.51888	5	6	2.992	1.26e-06		cytochrome P450, family 27, subfamily B, polypeptide 1	Homo sapiens cytochrome P450, family 27, subfamily B, polypeptide 1 (CYP27B1), mRNA [NM_000785]	CTGAGGAAAGATTCAACTGCCTCTCTTTTTGGGCTTTCATAGTGTTCATTGATGCTGCTG
A_24_P171058	NM_001008495	TMEM64	Hs.567759	169200	hs|8q21.3	GO:0005783(endoplasmic reticulum)|GO:0016021(integral to membrane)|GO:0043462(regulation of ATPase activity)|GO:0045672(positive regulation of osteoclast differentiation)|GO:0045780(positive regulation of bone resorption)|GO:0051480(cytosolic calcium ion homeostasis)	0.156259	0.334939	0.582258	0.870383	0.354735	0.343456	0.815351	1.39325	1.14496	0.902585	1.14502	1.69207	6	6	2.982	0.00407		transmembrane protein 64	Homo sapiens transmembrane protein 64 (TMEM64), transcript variant 1, mRNA [NM_001008495]	CCTCATCTACTAAAGTACAAAGGAATTCTTTGGAAGCAGATTATTCTAGTCTTATGCTAG
A_23_P76488	NM_001423	EMP1	Hs.719042	2012	hs|12p13.1	GO:0005886(plasma membrane)|GO:0007275(multicellular organismal development)|GO:0008283(cell proliferation)|GO:0008544(epidermis development)|GO:0016020(membrane)|GO:0016021(integral to membrane)|GO:0016049(cell growth)	55.9572	42.4319	40.5476	32.1955	43.5219	44.2184	117.784	148.041	111.115	125.307	119.695	142.177	6	6	2.975	8.24e-07		epithelial membrane protein 1	Homo sapiens epithelial membrane protein 1 (EMP1), mRNA [NM_001423]	CATGTAATTTGCATTACTCTGGTGGATTGTTCTAGTACTGTATTGGGCTTCTTCGTTAAT
A_21_P0000500	NR_004399	SNORD86	Hs.376064	692201	hs|20p13		4.2715	5.60634	5.96394	4.24999	5.68226	4.89423	16.5212	14.6752	18.533	13.8348	13.7587	13.6157	6	6	2.973	1.13e-07		small nucleolar RNA, C/D box 86	Homo sapiens small nucleolar RNA, C/D box 86 (SNORD86), small nucleolar RNA [NR_004399]	CCCTGACCTATACAGGCCTCTGCTATGGGGGTGATGGCCAGTCCTGGTGTCTGAGTGATT
A_33_P3254606	NM_001083961	WDR62	Hs.116244	284403	hs|19q13.12	GO:0000922(spindle pole)|GO:0005634(nucleus)|GO:0005730(nucleolus)|GO:0005737(cytoplasm)|GO:0021987(cerebral cortex development)|GO:0022008(neurogenesis)	2.37299	1.01823	1.08169	1.08548	1.20895	1.30694	3.7151	3.76951	3.9631	4.36695	3.13974	4.0456	6	6	2.97	0.000166		WD repeat domain 62	Homo sapiens WD repeat domain 62 (WDR62), transcript variant 1, mRNA [NM_001083961]	GCCCTGCTGCTTCTGAGGACTTAGGTATTTTAAGCGAATAAACTGACAGCTTTGAGGAAT
A_32_P219116	NM_018451	CENPJ	Hs.741581	55835	hs|13q12.12	GO:0000086(G2/M transition of mitotic cell cycle)|GO:0000278(mitotic cell cycle)|GO:0005515(protein binding)|GO:0005813(centrosome)|GO:0005814(centriole)|GO:0005829(cytosol)|GO:0005874(microtubule)|GO:0007020(microtubule nucleation)|GO:0007099(centriole replication)|GO:0008275(gamma-tubulin small complex)|GO:0015631(tubulin binding)|GO:0019901(protein kinase binding)|GO:0019904(protein domain spe…	3.13092	2.11656	2.25046	2.01137	2.20165	2.10396	6.31472	7.1248	6.76799	6.91002	5.75657	7.77118	6	6	2.964	3.79e-07		centromere protein J	Homo sapiens centromere protein J (CENPJ), transcript variant 1, mRNA [NM_018451]	ACTACATACTGCCCAGTTCAAGAGACGGGAATACCCAGATGGCACTGTTAAAACCGTATA
A_23_P311144	NM_144978	CCDC138	Hs.731709	165055	hs|2q12.3		0.0375316	0.296653	0.204375	0.164469	0.223311	0.173423	0.484023	0.53539	0.396039	0.543383	0.318686	0.539618	5	6	2.952	0.0135		coiled-coil domain containing 138	Homo sapiens coiled-coil domain containing 138 (CCDC138), mRNA [NM_144978]	TAAGTCATCTAAGAATATCCAGTAAAGGACTCCTGTCTAATGTTATTGATAGTTTGCTCC
A_23_P102731	NM_175839	SMOX	Hs.433337	54498	hs|20p13	GO:0005634(nucleus)|GO:0005737(cytoplasm)|GO:0005829(cytosol)|GO:0006595(polyamine metabolic process)|GO:0006596(polyamine biosynthetic process)|GO:0006598(polyamine catabolic process)|GO:0006805(xenobiotic metabolic process)|GO:0034641(cellular nitrogen compound metabolic process)|GO:0044281(small molecule metabolic process)|GO:0046208(spermine catabolic process)|GO:0046592(polyamine oxidase act…	8.67863	4.49087	4.20888	4.4627	4.98766	5.22988	13.5785	16.1422	15.3948	14.5541	14.3345	17.9541	6	6	2.952	5.97e-05		spermine oxidase	Homo sapiens spermine oxidase (SMOX), transcript variant 1, mRNA [NM_175839]	CTGCCTTGTTATTGTAAGTGCCTTCAATACTTTGCATTTTGGGATAATAAAAAAGGCTCC
A_24_P234116	NM_017860	C1orf56	Hs.549171	54964	hs|1q21.3	GO:0005576(extracellular region)|GO:0005634(nucleus)|GO:0005730(nucleolus)|GO:0005737(cytoplasm)	1.39446	1.43627	1.04871	1.61043	1.42633	1.22566	2.7867	4.37329	4.10655	4.776	3.69804	4.40594	6	6	2.95	1.23e-06		chromosome 1 open reading frame 56	Homo sapiens chromosome 1 open reading frame 56 (C1orf56), mRNA [NM_017860]	GACTGGAACTGAGAGTAAATTGGGAATGTATGACCAATCTTAGACCCTGAAAAATGGCAG
A_23_P32253	NM_005384	NFIL3	Hs.79334	4783	hs|9q22.31	GO:0000122(negative regulation of transcription from RNA polymerase II promoter)|GO:0000977(RNA polymerase II regulatory region sequence-specific DNA binding)|GO:0000979(RNA polymerase II core promoter sequence-specific DNA binding)|GO:0001078(RNA polymerase II core promoter proximal region sequence-specific DNA binding transcription factor activity involved in negative regulation of transcriptio…	4.40831	2.9256	2.09682	1.7488	3.03195	3.04318	8.13662	7.80353	7.1835	9.06498	7.33959	9.31404	6	6	2.941	0.000227		nuclear factor, interleukin 3 regulated	Homo sapiens nuclear factor, interleukin 3 regulated (NFIL3), transcript variant 3, mRNA [NM_005384]	TGTGTTATCACTCTGCCTGTGTATAGTCAGATAGTCCATGCGAAGGCTGTATATATTGAA
A_33_P3337272	NM_001004354	NRARP	Hs.732282	441478	hs|9q34.3	GO:0000122(negative regulation of transcription from RNA polymerase II promoter)|GO:0001569(patterning of blood vessels)|GO:0001938(positive regulation of endothelial cell proliferation)|GO:0002043(blood vessel endothelial cell proliferation involved in sprouting angiogenesis)|GO:0022407(regulation of cell-cell adhesion)|GO:0032525(somite rostral/caudal axis specification)|GO:0045581(negative reg…	21.3183	17.136	16.5513	16.3473	14.5233	16.039	51.7685	52.7491	49.7887	51.7562	48.3942	43.7076	6	6	2.941	1.29e-07		NOTCH-regulated ankyrin repeat protein	Homo sapiens NOTCH-regulated ankyrin repeat protein (NRARP), mRNA [NM_001004354]	CACATTCCTGAGTGTACGATATTGACCTGTAGCCCAGCGTGAAAAATTTATAAATAAATT
A_33_P3347343	NM_001093729	CCDC102B	Hs.280781	79839	hs|18q22.1		0.0972501	0.0629932	0.151571	0.165127	0.207649	0.176669	0.244844	0.407411	0.479582	0.409104	0.530077	0.349228	4	6	2.939	0.000904		coiled-coil domain containing 102B	Homo sapiens coiled-coil domain containing 102B (CCDC102B), transcript variant 1, mRNA [NM_001093729]	GATTAAGTGCAAACTCTCAAAGTCCTGATTTCAAGATGTCACAAATTGATCTGCAAGAAA
A_33_P3376971	NM_024111	CHAC1	Hs.155569	79094	hs|15q15.1	GO:0005112(Notch binding)|GO:0005515(protein binding)|GO:0005802(trans-Golgi network)|GO:0005829(cytosol)|GO:0006986(response to unfolded protein)|GO:0007219(Notch signaling pathway)|GO:0010955(negative regulation of protein processing)|GO:0022008(neurogenesis)|GO:0045746(negative regulation of Notch signaling pathway)|GO:0070059(intrinsic apoptotic signaling pathway in response to endoplasmic re…	8.76046	5.00148	4.6707	4.55965	4.67755	5.65794	13.7081	13.5026	20.8595	14.4796	14.2205	19.9714	6	6	2.938	1.2e-05		ChaC, cation transport regulator homolog 1 (E. coli)	Homo sapiens ChaC, cation transport regulator homolog 1 (E. coli) (CHAC1), transcript variant 1, mRNA [NM_024111]	TTCCTGGGAAGCTCATCACTACAGGCCCTGGCAACCTTCCCAGTCTGTCCCATACTGTTA
A_23_P430161	NM_175876	EXOC8	Hs.356198	149371	hs|1q42.2	GO:0000145(exocyst)|GO:0005515(protein binding)|GO:0005737(cytoplasm)|GO:0005886(plasma membrane)|GO:0006887(exocytosis)|GO:0015031(protein transport)|GO:0030426(growth cone)|GO:0034613(cellular protein localization)|GO:0044267(cellular protein metabolic process)|GO:0061024(membrane organization)	0.678006	0.834031	0.79857	1.09362	0.763927	0.690838	1.94276	2.55877	2.23731	2.10809	2.63341	2.71201	6	6	2.937	5.02e-07		exocyst complex component 8	Homo sapiens exocyst complex component 8 (EXOC8), mRNA [NM_175876]	AAGTACAGGATTTTCTTCAGGTAAAATCTGTGTGTTCCAATTACAGTTGTAGCTGAAGGA
A_23_P10385	NM_016448	DTL	Hs.656473	51514	hs|1q32.3	GO:0000209(protein polyubiquitination)|GO:0004842(ubiquitin-protein ligase activity)|GO:0005515(protein binding)|GO:0005634(nucleus)|GO:0005694(chromosome)|GO:0005730(nucleolus)|GO:0005737(cytoplasm)|GO:0005813(centrosome)|GO:0006260(DNA replication)|GO:0006511(ubiquitin-dependent protein catabolic process)|GO:0006513(protein monoubiquitination)|GO:0006974(response to DNA damage stimulus)|GO:0009…	1.37711	0.892406	0.975653	0.980248	0.996992	1.09426	2.81215	3.11691	2.76862	3.479	2.94301	3.29455	6	6	2.934	3.14e-07		denticleless E3 ubiquitin protein ligase homolog (Drosophila)	Homo sapiens denticleless E3 ubiquitin protein ligase homolog (Drosophila) (DTL), transcript variant 1, mRNA [NM_016448]	GGAAGATGTTATTTATGACCAATATCTGCCAGTAACGCTGTTTATCTCACTTGCTTTGAA
A_33_P3350488	NM_016359	NUSAP1	Hs.615092	51203	hs|15q15.1	GO:0000070(mitotic sister chromatid segregation)|GO:0000281(cytokinesis after mitosis)|GO:0003677(DNA binding)|GO:0005634(nucleus)|GO:0005694(chromosome)|GO:0005730(nucleolus)|GO:0005737(cytoplasm)|GO:0005876(spindle microtubule)|GO:0007076(mitotic chromosome condensation)|GO:0008017(microtubule binding)|GO:0040001(establishment of mitotic spindle localization)|GO:0045840(positive regulation of m…	4.26142	3.04945	2.64813	3.11589	2.20744	3.7278	8.841	11.8837	6.1508	10.3738	9.33287	8.89687	6	6	2.929	1.01e-05		nucleolar and spindle associated protein 1	Homo sapiens nucleolar and spindle associated protein 1 (NUSAP1), transcript variant 1, mRNA [NM_016359]	CCTCAGTGGAGCTTCTGAGTTTTATACTGCTCAAGATCGTCATAAATAAAATTTTTTCTC
A_23_P18017	NM_001870	CPA3	Hs.646	1359	hs|3q24	GO:0002003(angiotensin maturation)|GO:0004181(metallocarboxypeptidase activity)|GO:0005576(extracellular region)|GO:0006508(proteolysis)|GO:0008270(zinc ion binding)|GO:0030133(transport vesicle)|GO:0030141(secretory granule)|GO:0044267(cellular protein metabolic process)	0.400279	0.594266	0.502659	0.865371	0.52964	0.553494	1.40968	1.83166	1.93614	1.78608	1.51691	1.41241	6	6	2.928	2.02e-05		carboxypeptidase A3 (mast cell)	Homo sapiens carboxypeptidase A3 (mast cell) (CPA3), mRNA [NM_001870]	GCCAAGTATATCCTCAAGCATACTTCCTAAAGAACTGCCCTCTGTTTGGAATAAGCCAAT
A_23_P161152	NM_014317	PDSS1	Hs.558468	23590	hs|10p12.1	GO:0000010(trans-hexaprenyltranstransferase activity)|GO:0005759(mitochondrial matrix)|GO:0006744(ubiquinone biosynthetic process)|GO:0008299(isoprenoid biosynthetic process)|GO:0044281(small molecule metabolic process)|GO:0046872(metal ion binding)|GO:0046982(protein heterodimerization activity)|GO:0050347(trans-octaprenyltranstransferase activity)|GO:0051290(protein heterotetramerization)	1.14307	1.15607	1.45115	1.47333	1.23234	1.4551	3.44253	3.26211	4.08211	4.32241	4.073	3.94731	6	6	2.927	1.99e-08		prenyl (decaprenyl) diphosphate synthase, subunit 1	Homo sapiens prenyl (decaprenyl) diphosphate synthase, subunit 1 (PDSS1), mRNA [NM_014317]	AGTTCCCAGAAATGAATGCTATGATCATGCGACGGTTCAGTTTGCCTGGAGATGTAGACA
A_23_P70007	NM_012484	HMMR	Hs.740467	3161	hs|5q34	GO:0005540(hyaluronic acid binding)|GO:0005737(cytoplasm)|GO:0005886(plasma membrane)|GO:0005975(carbohydrate metabolic process)|GO:0009986(cell surface)|GO:0030203(glycosaminoglycan metabolic process)|GO:0030212(hyaluronan metabolic process)|GO:0030214(hyaluronan catabolic process)|GO:0044281(small molecule metabolic process)	3.45174	1.91582	2.4931	1.98503	2.30115	2.27072	7.07109	7.75779	6.55975	6.29604	6.14677	7.64543	6	6	2.922	8.77e-06		hyaluronan-mediated motility receptor (RHAMM)	Homo sapiens hyaluronan-mediated motility receptor (RHAMM) (HMMR), transcript variant 2, mRNA [NM_012484]	ACTATTTCTTCAGAGTTTGTCATATACTGCTTGTCATCTGCATGTCTACTCAGCATTTGA
A_23_P321388	NM_153341	RNF19B	Hs.591504	127544	hs|1p35.1	GO:0005515(protein binding)|GO:0005737(cytoplasm)|GO:0008270(zinc ion binding)|GO:0016021(integral to membrane)|GO:0016567(protein ubiquitination)|GO:0016874(ligase activity)|GO:0042267(natural killer cell mediated cytotoxicity)|GO:0044194(cytolytic granule)|GO:0072643(interferon-gamma secretion)	1.15744	1.70295	1.68114	2.09536	1.78798	1.65619	4.31357	4.47672	5.08972	5.52814	4.96775	4.73437	6	6	2.921	5.39e-06		ring finger protein 19B	Homo sapiens ring finger protein 19B (RNF19B), transcript variant 1, mRNA [NM_153341]	GCATTCTCTCCAGTGGCAAGGGAAAATATAGCAGGTTAGAAGTTCAAGCCGATGTCCAAA
A_23_P345707	NM_152259	TICRR	Hs.441708	90381	hs|15q26.1	GO:0000075(cell cycle checkpoint)|GO:0001731(formation of translation preinitiation complex)|GO:0003682(chromatin binding)|GO:0005515(protein binding)|GO:0005634(nucleus)|GO:0005730(nucleolus)|GO:0006260(DNA replication)|GO:0006281(DNA repair)|GO:0010212(response to ionizing radiation)|GO:0030174(regulation of DNA-dependent DNA replication initiation)|GO:0033314(mitotic cell cycle DNA replication…	0.576501	0.343613	0.461904	0.392	0.379782	0.391238	1.12984	1.00766	1.2318	1.36542	1.20294	1.43788	6	6	2.921	1.02e-06		TOPBP1-interacting checkpoint and replication regulator	Homo sapiens TOPBP1-interacting checkpoint and replication regulator (TICRR), mRNA [NM_152259]	CCATATACGTGAAACTGAAGAGTGCATTGGGCAGTGGAAGCTATTTTTTGCCTTCCCTGT
A_33_P3353425	NM_020935	USP37	Hs.166068	57695	hs|2q35	GO:0000082(G1/S transition of mitotic cell cycle)|GO:0004197(cysteine-type endopeptidase activity)|GO:0004843(ubiquitin-specific protease activity)|GO:0005515(protein binding)|GO:0005634(nucleus)|GO:0006511(ubiquitin-dependent protein catabolic process)|GO:0007067(mitosis)|GO:0016579(protein deubiquitination)|GO:0019901(protein kinase binding)|GO:0035871(protein K11-linked deubiquitination)|GO:00…	0.279091	0.149951	0.199685	0.154568	0.147715	0.219077	0.590264	0.558765	0.480437	0.612306	0.475945	0.558998	6	6	2.918	4.37e-05		ubiquitin specific peptidase 37	Homo sapiens ubiquitin specific peptidase 37 (USP37), mRNA [NM_020935]	ATCCTTTTATGGTAGCAGAGCTGGATCCAAGGAACACTCTTCTGGTGGCACTAACTTAGA
A_23_P408955	NM_004091	E2F2	Hs.194333	1870	hs|1p36.12	GO:0000278(mitotic cell cycle)|GO:0001047(core promoter binding)|GO:0003677(DNA binding)|GO:0003700(sequence-specific DNA binding transcription factor activity)|GO:0005515(protein binding)|GO:0005654(nucleoplasm)|GO:0005667(transcription factor complex)|GO:0006355(regulation of transcription, DNA-dependent)|GO:0006367(transcription initiation from RNA polymerase II promoter)|GO:0008134(transcript…	0.683327	0.308973	0.254513	0.241417	0.297906	0.351652	0.996271	0.902565	0.969505	1.04783	0.859163	1.05394	6	6	2.911	0.000745		E2F transcription factor 2	Homo sapiens E2F transcription factor 2 (E2F2), mRNA [NM_004091]	CTTTATGAGCACCATGTAAGCCTCCTTGTATTGAGATAATTGGGCATTAAACATTAAACT
A_33_P3340040	NM_032336	GINS4	Hs.656996	84296	hs|8p11.21	GO:0000278(mitotic cell cycle)|GO:0005515(protein binding)|GO:0005654(nucleoplasm)|GO:0005737(cytoplasm)|GO:0006271(DNA strand elongation involved in DNA replication)	0.663661	0.96876	0.848804	0.881552	0.906001	0.849505	1.92838	2.61939	2.80812	2.74982	2.21501	2.60575	6	6	2.911	1.22e-07		GINS complex subunit 4 (Sld5 homolog)	Homo sapiens GINS complex subunit 4 (Sld5 homolog) (GINS4), mRNA [NM_032336]	CCTGAAGCCCAAGTTCATTTAGTATGTCATGGTTAATTCAGAGTAAAATCAAGAGTTAGT
A_23_P25626	NM_024808	BORA	Hs.643464	79866	hs|13q22.1	GO:0000086(G2/M transition of mitotic cell cycle)|GO:0000278(mitotic cell cycle)|GO:0005515(protein binding)|GO:0005829(cytosol)|GO:0007067(mitosis)|GO:0007088(regulation of mitosis)|GO:0019901(protein kinase binding)|GO:0032880(regulation of protein localization)|GO:0060236(regulation of mitotic spindle organization)	0.450863	0.655615	0.509787	0.610184	0.605222	0.613268	1.36324	1.96711	1.62039	2.05401	1.55099	1.49364	6	6	2.909	2.9e-07		bora, aurora kinase A activator	Homo sapiens bora, aurora kinase A activator (BORA), transcript variant 1, mRNA [NM_024808]	ATACCTCTGTCAGAATCAAAGACTAAGCTTAAGAGTTCCTCGCATATATCGTTGTGCACA
A_23_P32707	NM_012291	ESPL1	Hs.153479	9700	hs|12q13.13	GO:0000070(mitotic sister chromatid segregation)|GO:0000212(meiotic spindle organization)|GO:0000278(mitotic cell cycle)|GO:0000910(cytokinesis)|GO:0003824(catalytic activity)|GO:0005515(protein binding)|GO:0005634(nucleus)|GO:0005813(centrosome)|GO:0005829(cytosol)|GO:0006508(proteolysis)|GO:0006915(apoptotic process)|GO:0008234(cysteine-type peptidase activity)|GO:0040001(establishment of mitot…	0.861418	1.23858	1.33373	1.21582	1.12916	0.974592	3.49572	3.61422	2.95081	3.07524	3.01621	3.31756	6	6	2.906	1.24e-06		extra spindle pole bodies homolog 1 (S. cerevisiae)	Homo sapiens extra spindle pole bodies homolog 1 (S. cerevisiae) (ESPL1), mRNA [NM_012291]	CTGGTTGCCCCTTGTTTCTGGGTAATCTCTGGGATGTGACTGACCGCGACATTGACCGCT
A_21_P0000064	NM_006665	HPSE	Hs.44227	10855	hs|4q21.23	GO:0004566(beta-glucuronidase activity)|GO:0005515(protein binding)|GO:0005576(extracellular region)|GO:0005634(nucleus)|GO:0005730(nucleolus)|GO:0005764(lysosome)|GO:0005765(lysosomal membrane)|GO:0005975(carbohydrate metabolic process)|GO:0006027(glycosaminoglycan catabolic process)|GO:0006029(proteoglycan metabolic process)|GO:0007160(cell-matrix adhesion)|GO:0010575(positive regulation vascul…	0.260097	0.363658	0.337198	0.317409	0.163019	0.247445	0.768867	0.720298	0.840615	0.878596	0.878211	0.677564	6	6	2.901	0.000117		heparanase	Homo sapiens heparanase (HPSE), transcript variant 1, mRNA [NM_006665]	CTGCAGTTCTGCGCTTTTTACCAGTGAAAAAATGTAATTATTTTCCCCTCTTAAGGATTA
A_33_P3421626	NM_001080392	KIAA1147	Hs.521240	57189	hs|7q34		2.72277	2.19134	1.51454	2.28199	2.26294	1.76962	5.66909	6.50991	5.70002	5.64602	6.19695	6.68486	6	6	2.901	1.63e-05		KIAA1147	Homo sapiens KIAA1147 (KIAA1147), mRNA [NM_001080392]	CTGGGGTTAATCCTGAAGCTAAAAGTAAATGTTTCTTGAATTGATTTTGTTCTGTGGTAC
A_33_P3364964	AK130913	LOC100129596	Hs.639990	100129596	hs|8q24.3		0.727584	1.25823	1.26702	2.21822	1.02012	0.969196	2.43901	2.33237	4.65468	3.48721	4.37525	3.74326	6	6	2.9	0.000323		uncharacterized LOC100129596	Homo sapiens cDNA FLJ27403 fis, clone WMC03327. [AK130913]	GGCCTGTCAGGGCAACCTCCTCGGCTCCTGCAGCACAATCTTTCTGGTTCACTGCAGTAA
A_24_P241276	NM_181503	EXOSC8	Hs.294041	11340	hs|13q13.3	GO:0000178(exosome (RNase complex))|GO:0000288(nuclear-transcribed mRNA catabolic process, deadenylation-dependent decay)|GO:0004532(exoribonuclease activity)|GO:0005515(protein binding)|GO:0005634(nucleus)|GO:0005730(nucleolus)|GO:0005737(cytoplasm)|GO:0005829(cytosol)|GO:0006364(rRNA processing)|GO:0008150(biological_process)|GO:0010467(gene expression)|GO:0016070(RNA metabolic process)|GO:0016…	8.63482	5.20703	3.59441	5.13957	4.93084	5.98454	16.0739	17.9216	11.8383	18.1362	14.703	15.9389	6	6	2.897	5.22e-05		exosome component 8	Homo sapiens exosome component 8 (EXOSC8), mRNA [NM_181503]	GCTAACTGGAGCTAAACTTCAGGACTGTATGAGCCGAGCAGTTACAAGACACAAAGAAGT
A_24_P114339	NM_022780	RMND5A	Hs.75277	64795	hs|2p11.2		0.0808292	0.205239	0.214348	0.270621	0.180671	0.0949162	0.338941	0.440271	0.392612	0.660788	0.513875	0.489461	4	6	2.896	0.00175		required for meiotic nuclear division 5 homolog A (S. cerevisiae)	Homo sapiens required for meiotic nuclear division 5 homolog A (S. cerevisiae) (RMND5A), mRNA [NM_022780]	CAAGACATAGCAAGAGAAACAAAATTTTGTTTTCAAGACATTTCCACTGCAGTTTCAAGC
A_24_P345209	NM_001004023	DYRK3	Hs.164267	8444	hs|1q32.1	GO:0000287(magnesium ion binding)|GO:0004672(protein kinase activity)|GO:0004674(protein serine/threonine kinase activity)|GO:0004712(protein serine/threonine/tyrosine kinase activity)|GO:0004713(protein tyrosine kinase activity)|GO:0005524(ATP binding)|GO:0005634(nucleus)|GO:0006468(protein phosphorylation)|GO:0018108(peptidyl-tyrosine phosphorylation)|GO:0030218(erythrocyte differentiation)	0.719413	0.676681	0.552095	0.374308	0.41222	0.563439	1.55107	1.35057	1.47369	1.97011	1.47067	1.53495	6	6	2.894	3.56e-05		dual-specificity tyrosine-(Y)-phosphorylation regulated kinase 3	Homo sapiens dual-specificity tyrosine-(Y)-phosphorylation regulated kinase 3 (DYRK3), transcript variant 2, mRNA [NM_001004023]	GGAATAGCCAATAAGCTTAAAGCTAACTTAATGTCAGAAACCAATGGTAGTATACCCCTA
A_23_P59069	NM_003527	HIST1H2BO	Hs.484991	8348	hs|6p22.1	GO:0000786(nucleosome)|GO:0003677(DNA binding)|GO:0005634(nucleus)|GO:0005654(nucleoplasm)|GO:0006325(chromatin organization)|GO:0006334(nucleosome assembly)|GO:0046982(protein heterodimerization activity)	0.888491	0.866443	0.767805	0.852516	0.766109	0.655721	2.01731	2.2229	2.51728	2.49192	2.34075	2.25402	6	6	2.893	1.49e-08		histone cluster 1, H2bo	Homo sapiens histone cluster 1, H2bo (HIST1H2BO), mRNA [NM_003527]	AAAGGCCGTCACCAAGTACACCAGCTCCAAGTGAGCTCTCGCAGCTGCCAGCAATCCAAA
A_23_P118427	NM_145109	MAP2K3	Hs.514012	5606	hs|17p11.2	GO:0000187(activation of MAPK activity)|GO:0002224(toll-like receptor signaling pathway)|GO:0002755(MyD88-dependent toll-like receptor signaling pathway)|GO:0002756(MyD88-independent toll-like receptor signaling pathway)|GO:0004702(receptor signaling protein serine/threonine kinase activity)|GO:0004708(MAP kinase kinase activity)|GO:0004713(protein tyrosine kinase activity)|GO:0005515(protein bin…	5.83443	5.19017	6.52693	5.67911	5.27364	4.97973	17.9771	18.1378	14.8782	16.1936	14.116	15.4856	6	6	2.89	4.85e-09		mitogen-activated protein kinase kinase 3	Homo sapiens mitogen-activated protein kinase kinase 3 (MAP2K3), transcript variant B, mRNA [NM_145109]	TATCCCGGCTTTGGTGCGGGGTACACAAGAGGGGATGAGTTGTGTGAATACCCCAAGACT
A_23_P144999	NM_016340	RAPGEF6	Hs.483329	51735	hs|5q31.1	GO:0005085(guanyl-nucleotide exchange factor activity)|GO:0005515(protein binding)|GO:0005737(cytoplasm)|GO:0005886(plasma membrane)|GO:0007265(Ras protein signal transduction)|GO:0017016(Ras GTPase binding)|GO:0030742(GTP-dependent protein binding)|GO:0043087(regulation of GTPase activity)|GO:0051056(regulation of small GTPase mediated signal transduction)	0.327676	0.362775	0.16957	0.612898	0.326632	0.344908	0.89684	1.12415	0.993899	0.958546	0.742701	1.1349	6	6	2.889	0.000788		Rap guanine nucleotide exchange factor (GEF) 6	Homo sapiens Rap guanine nucleotide exchange factor (GEF) 6 (RAPGEF6), transcript variant 2, mRNA [NM_016340]	AGTGAAAGTTATGCTGCATCGAATTGTAACTGAAAGTATAGATCCAACAAATAGAGACTG
A_32_P63848	NM_000436	OXCT1	Hs.278277	5019	hs|5p13.1	GO:0005739(mitochondrion)|GO:0005759(mitochondrial matrix)|GO:0007420(brain development)|GO:0007507(heart development)|GO:0007584(response to nutrient)|GO:0008260(3-oxoacid CoA-transferase activity)|GO:0009725(response to hormone stimulus)|GO:0014823(response to activity)|GO:0032024(positive regulation of insulin secretion)|GO:0042182(ketone catabolic process)|GO:0042493(response to drug)|GO:0042…	0.935392	0.648023	0.462839	1.41562	0.935681	1.06513	2.21444	2.66037	2.47529	2.65979	2.49148	2.37674	6	6	2.888	0.00101		3-oxoacid CoA transferase 1	Homo sapiens 3-oxoacid CoA transferase 1 (OXCT1), mRNA [NM_000436]	CACTTCTTTTCAGGTGTAGCTACAATTGTGTAATGTACAATATTAGAGAAAGGACAGGCT
A_23_P206059	NM_003981	PRC1	Hs.366401	9055	hs|15q26.1	GO:0000022(mitotic spindle elongation)|GO:0000910(cytokinesis)|GO:0000922(spindle pole)|GO:0005515(protein binding)|GO:0005634(nucleus)|GO:0005730(nucleolus)|GO:0005737(cytoplasm)|GO:0005819(spindle)|GO:0005876(spindle microtubule)|GO:0005886(plasma membrane)|GO:0008017(microtubule binding)|GO:0015630(microtubule cytoskeleton)|GO:0019901(protein kinase binding)|GO:0042802(identical protein bindin…	7.16917	7.85984	7.47166	6.52508	7.52577	7.68901	19.9703	24.9597	19.1168	22.657	18.5856	22.8789	6	6	2.886	6.04e-08		protein regulator of cytokinesis 1	Homo sapiens protein regulator of cytokinesis 1 (PRC1), transcript variant 1, mRNA [NM_003981]	TCTCAATCACTACTCTTCTTGAAGCACTATTATTTATTCTTCCGCTGTCTGCCTGCAGCA
A_33_P3242623	NM_014331	SLC7A11	Hs.390594	23657	hs|4q28.3	GO:0003333(amino acid transmembrane transport)|GO:0005515(protein binding)|GO:0005791(rough endoplasmic reticulum)|GO:0005856(cytoskeleton)|GO:0005886(plasma membrane)|GO:0006811(ion transport)|GO:0006865(amino acid transport)|GO:0006979(response to oxidative stress)|GO:0007420(brain development)|GO:0007596(blood coagulation)|GO:0009636(response to toxin)|GO:0015327(cystine:glutamate antiporter a…	17.0009	14.722	15.4624	16.3368	18.4933	16.8907	40.9009	60.0368	39.214	54.1984	44.6319	48.7404	6	6	2.884	1.58e-06		solute carrier family 7 (anionic amino acid transporter light chain, xc- system), member 11	Homo sapiens solute carrier family 7 (anionic amino acid transporter light chain, xc- system), member 11 (SLC7A11), mRNA [NM_014331]	GAAGTAAGTGTGTTTGTTTTCATCTTATGGAAACTCTTGATGCATGTGCTTTTGTATGGA
A_32_P214925	NM_173678	FAM115C	Hs.743565	285966	hs|7q35		0.702025	0.385315	0.367183	0.393298	0.455615	0.394577	1.12876	1.31834	1.24542	1.39911	1.16746	1.32859	6	6	2.882	4.69e-05		family with sequence similarity 115, member C	Homo sapiens family with sequence similarity 115, member C (FAM115C), transcript variant 2, mRNA [NM_173678]	CTGCAGCTGAATCACAGCTCTTGCCCTCATTGGTTTTGTTCTTGGTCTCCTAATAAGTGT
A_23_P301995	NM_173083	LIN9	Hs.120817	286826	hs|1q42.12	GO:0000086(G2/M transition of mitotic cell cycle)|GO:0000278(mitotic cell cycle)|GO:0005515(protein binding)|GO:0005654(nucleoplasm)|GO:0006260(DNA replication)|GO:0006351(transcription, DNA-dependent)|GO:0017053(transcriptional repressor complex)|GO:0051726(regulation of cell cycle)	0.196409	0.137109	0.180005	0.148996	0.136182	0.188257	0.44245	0.505167	0.472509	0.437223	0.512049	0.444738	6	6	2.878	2.51e-06		lin-9 homolog (C. elegans)	Homo sapiens lin-9 homolog (C. elegans) (LIN9), transcript variant 1, mRNA [NM_173083]	CCTCCTCTCCAGTCACCAATTATAGATAATGATCCTTTATTAGGACAGTCGCCGTGGAGA
A_24_P147461	NM_001031848	SERPINB8	Hs.368077	5271	hs|18q22.1	GO:0004867(serine-type endopeptidase inhibitor activity)|GO:0005515(protein binding)|GO:0005615(extracellular space)|GO:0005829(cytosol)|GO:0010951(negative regulation of endopeptidase activity)|GO:0030162(regulation of proteolysis)	0.847546	1.35926	1.69132	1.7502	1.65047	1.31277	3.62755	3.205	4.99877	4.98908	4.07664	3.53615	6	6	2.876	2.84e-05		serpin peptidase inhibitor, clade B (ovalbumin), member 8	Homo sapiens serpin peptidase inhibitor, clade B (ovalbumin), member 8 (SERPINB8), transcript variant 3, mRNA [NM_001031848]	AGACTCTTTGGAGAAAAGACGTGTGATTTCCTTCCAGACTTTAAAGAATACTGTCAGAAG
A_23_P301247	NM_003517	HIST2H2AC	Hs.408067	8338	hs|1q21.2	GO:0000786(nucleosome)|GO:0003674(molecular_function)|GO:0003677(DNA binding)|GO:0005634(nucleus)|GO:0006334(nucleosome assembly)|GO:0008150(biological_process)|GO:0046982(protein heterodimerization activity)|GO:0070062(extracellular vesicular exosome)	0.357018	0.298011	0.264051	0.180994	0.339699	0.348712	0.826692	1.05564	0.998971	0.886948	0.604814	0.727198	6	6	2.875	1.9e-05		histone cluster 2, H2ac	Homo sapiens histone cluster 2, H2ac (HIST2H2AC), mRNA [NM_003517]	GGCCGTTCTGTTACCAAAGAAAACCGAAAGCCACAAAGCCAAAAGCAAATAAATGCAGAC
A_24_P81965	NM_021033	RAP2A	Hs.508480	5911	hs|13q32.1	GO:0003924(GTPase activity)|GO:0005515(protein binding)|GO:0005525(GTP binding)|GO:0005829(cytosol)|GO:0006184(GTP catabolic process)|GO:0030336(negative regulation of cell migration)|GO:0030496(midbody)|GO:0031532(actin cytoskeleton reorganization)|GO:0031954(positive regulation of protein autophosphorylation)|GO:0032486(Rap protein signal transduction)|GO:0034613(cellular protein localization)|…	0.222437	1.13481	0.918004	1.87512	0.864457	1.02063	3.01058	2.6596	1.96394	2.77578	2.75798	1.79631	6	6	2.874	0.0137		RAP2A, member of RAS oncogene family	Homo sapiens RAP2A, member of RAS oncogene family (RAP2A), mRNA [NM_021033]	TTCTTTTGATGTTGCAACTTTTGGGTTCTTTTAAACTGTGATAGTGATGGTAACTGATGC
A_23_P115608	NM_020824	ARHGAP21	Hs.524195	57584	hs|10p12.1	GO:0000139(Golgi membrane)|GO:0005096(GTPase activator activity)|GO:0005515(protein binding)|GO:0005794(Golgi apparatus)|GO:0005856(cytoskeleton)|GO:0007030(Golgi organization)|GO:0007165(signal transduction)|GO:0030054(cell junction)|GO:0030659(cytoplasmic vesicle membrane)|GO:0043547(positive regulation of GTPase activity)|GO:0051683(establishment of Golgi localization)|GO:0051684(maintenance o…	1.03056	2.66749	1.79129	3.75334	2.34073	2.8987	5.15639	4.17376	5.55728	10.48	6.93491	8.06477	6	6	2.87	0.00121		Rho GTPase activating protein 21	Homo sapiens Rho GTPase activating protein 21 (ARHGAP21), mRNA [NM_020824]	TCGGATAGTTGTATACAAATGAGCAAGGTATTTGTTGCAACTTACTACATAGCATATACC
A_33_P3268124	NM_018293	ZNF654	Hs.591650	55279	hs|3p11.1	GO:0003677(DNA binding)|GO:0005634(nucleus)|GO:0006351(transcription, DNA-dependent)|GO:0006355(regulation of transcription, DNA-dependent)|GO:0046872(metal ion binding)	1.36295	1.03918	1.28885	1.03059	1.28097	1.04293	2.9075	3.73755	2.73841	4.06311	3.21075	3.61151	6	6	2.869	1.99e-07		zinc finger protein 654	Homo sapiens zinc finger protein 654 (ZNF654), mRNA [NM_018293]	GGTACTGTAAAACACCTTTTCAGAATGAGTAAATGCTGCATATGCATTTTGGAGTTGTTA
A_23_P74115	NM_003579	RAD54L	Hs.642042	8438	hs|1p34.1	GO:0000724(double-strand break repair via homologous recombination)|GO:0000733(DNA strand renaturation)|GO:0003677(DNA binding)|GO:0004386(helicase activity)|GO:0005515(protein binding)|GO:0005524(ATP binding)|GO:0005634(nucleus)|GO:0005730(nucleolus)|GO:0006281(DNA repair)|GO:0006310(DNA recombination)|GO:0007126(meiosis)|GO:0010212(response to ionizing radiation)|GO:0042493(response to drug)|GO…	2.73099	1.27258	1.41662	1.33664	1.54369	1.43251	4.06058	4.09429	4.4419	5.37034	4.02155	5.06591	6	6	2.867	7.38e-05		RAD54-like (S. cerevisiae)	Homo sapiens RAD54-like (S. cerevisiae) (RAD54L), transcript variant 1, mRNA [NM_003579]	GTTCTCTGGGAGAAAATCATCAAGAAGGGCTGCATGATGTTTGCCCAAAATTTATTTTAT
A_23_P90172	NM_014330	PPP1R15A	Hs.631593	23645	hs|19q13.33	GO:0005515(protein binding)|GO:0005783(endoplasmic reticulum)|GO:0005829(cytosol)|GO:0006417(regulation of translation)|GO:0006915(apoptotic process)|GO:0006974(response to DNA damage stimulus)|GO:0007050(cell cycle arrest)|GO:0007179(transforming growth factor beta receptor signaling pathway)|GO:0019901(protein kinase binding)|GO:0030512(negative regulation of transforming growth factor beta rec…	22.1232	16.1238	17.5072	13.7207	16.1718	16.4033	47.7769	41.7211	52.4203	47.1265	45.65	55.9573	6	6	2.865	3.42e-07		protein phosphatase 1, regulatory subunit 15A	Homo sapiens protein phosphatase 1, regulatory subunit 15A (PPP1R15A), mRNA [NM_014330]	ACCCTGAGACTCCCCTAAAGGCCAGAAAGGTGCGCTTCTCCGAGAAGGTCACTGTCCATT
A_23_P3302	NM_018365	MNS1	Hs.444483	55329	hs|15q21.3	GO:0005635(nuclear envelope)|GO:0005882(intermediate filament)|GO:0005930(axoneme)|GO:0007126(meiosis)|GO:0036126(sperm flagellum)|GO:0042802(identical protein binding)|GO:0070986(left/right axis specification)	0.380387	0.324094	0.291545	0.221405	0.377008	0.351864	0.9514	1.03514	0.714065	1.06297	0.806156	0.958779	6	6	2.86	2.75e-06		meiosis-specific nuclear structural 1	Homo sapiens meiosis-specific nuclear structural 1 (MNS1), mRNA [NM_018365]	TGTCAGCATAACTTTTGTTTTACAGTTCAGTGGCATTAGGTATCCATTGTCTGTTTGGAT
A_24_P254705	NM_020394	ZNF695	Hs.669893	57116	hs|1q44	GO:0003676(nucleic acid binding)|GO:0005634(nucleus)|GO:0006355(regulation of transcription, DNA-dependent)|GO:0046872(metal ion binding)	0.231332	0.091921	0.0363749	0.0749917	0.086559	0.0920233	0.205488	0.192673	0.404153	0.38005	0.158177	0.261366	2	5	2.857	0.00572		zinc finger protein 695	Homo sapiens zinc finger protein 695 (ZNF695), transcript variant 1, mRNA [NM_020394]	CCCTTGGTGAGGATAGCTTCAATATGCAATTCCTATTTCACAGTCTTGCTATGTCTAAGC
A_23_P65757	NM_004701	CCNB2	Hs.194698	9133	hs|15q22.2	GO:0000079(regulation of cyclin-dependent protein kinase activity)|GO:0000086(G2/M transition of mitotic cell cycle)|GO:0000278(mitotic cell cycle)|GO:0001701(in utero embryonic development)|GO:0005515(protein binding)|GO:0005654(nucleoplasm)|GO:0005813(centrosome)|GO:0005829(cytosol)|GO:0007067(mitosis)|GO:0007077(mitotic nuclear envelope disassembly)|GO:0015630(microtubule cytoskeleton)|GO:0016…	14.5795	9.62034	9.86161	7.13638	9.00064	9.87521	28.7925	27.2055	27.302	29.33	26.323	28.81	6	6	2.856	7.34e-05		cyclin B2	Homo sapiens cyclin B2 (CCNB2), mRNA [NM_004701]	TTGATTTTGTACATAGTCCTCTGGTCTATCTCATGAAACCTCTTCTCAGACCAGTTTTCT
A_24_P105191	NM_001077188	HS6ST2	Hs.385956	90161	hs|Xq26.2	GO:0000139(Golgi membrane)|GO:0005975(carbohydrate metabolic process)|GO:0006024(glycosaminoglycan biosynthetic process)|GO:0008146(sulfotransferase activity)|GO:0016021(integral to membrane)|GO:0030203(glycosaminoglycan metabolic process)|GO:0044281(small molecule metabolic process)|GO:0070062(extracellular vesicular exosome)	0.943069	0.720958	0.580772	0.596718	0.681478	0.63842	2.33837	2.00768	1.69946	2.06694	1.54208	2.16423	6	6	2.851	8.29e-07		heparan sulfate 6-O-sulfotransferase 2	Homo sapiens heparan sulfate 6-O-sulfotransferase 2 (HS6ST2), transcript variant L, mRNA [NM_001077188]	TCCCATGATTTCAACTGTAAACATCTGTCCATTGGTGTAGCTTTACAAACCATTCACTGA
A_23_P23356	NM_016052	RRP15	Hs.660109	51018	hs|1q41	GO:0005634(nucleus)|GO:0005730(nucleolus)|GO:0005739(mitochondrion)	3.00338	4.08121	3.05097	3.08297	2.87408	3.35878	8.12578	9.63443	9.27257	10.2611	9.15608	8.75984	6	6	2.851	7.72e-08		ribosomal RNA processing 15 homolog (S. cerevisiae)	Homo sapiens ribosomal RNA processing 15 homolog (S. cerevisiae) (RRP15), mRNA [NM_016052]	ACCATTTGTAAGAAAGCCAAAAGACTTTTGCCAGATTTCATATTTCCCCTTTTCATGTAC
A_33_P3386716	NM_032833	PPP1R15B	Hs.304376	84919	hs|1q32.1	GO:0000164(protein phosphatase type 1 complex)|GO:0004722(protein serine/threonine phosphatase activity)|GO:0005515(protein binding)|GO:0006417(regulation of translation)|GO:0006983(ER overload response)|GO:0016311(dephosphorylation)|GO:0042542(response to hydrogen peroxide)	2.30372	1.17961	1.16513	2.34713	2.07364	2.24352	4.67018	6.70791	3.32601	6.63382	5.26277	5.06204	6	6	2.847	0.000165		protein phosphatase 1, regulatory subunit 15B	Homo sapiens protein phosphatase 1, regulatory subunit 15B (PPP1R15B), mRNA [NM_032833]	GGGACTAGAAGACTCTAAATTGGCTTCTACAGATCAATAATTTAAATGTAACTAGTTGGG
A_23_P149892	NM_018590	CSGALNACT2	Hs.657569	55454	hs|10q11.21	GO:0000139(Golgi membrane)|GO:0005975(carbohydrate metabolic process)|GO:0008376(acetylgalactosaminyltransferase activity)|GO:0030166(proteoglycan biosynthetic process)|GO:0030173(integral to Golgi membrane)|GO:0030203(glycosaminoglycan metabolic process)|GO:0030204(chondroitin sulfate metabolic process)|GO:0030206(chondroitin sulfate biosynthetic process)|GO:0032580(Golgi cisterna membrane)|GO:0…	0.475468	2.60493	2.40166	3.49271	2.22182	1.53631	4.60467	5.48409	5.64805	5.77439	5.32499	4.28924	6	6	2.845	0.0146		chondroitin sulfate N-acetylgalactosaminyltransferase 2	Homo sapiens chondroitin sulfate N-acetylgalactosaminyltransferase 2 (CSGALNACT2), mRNA [NM_018590]	CATGGTGGTTCAGAATAGATGAGCATAGCATGGTTTTGTTTGTTTTTGCTTTCAATTTTC
A_24_P119577	NM_001048183	PHACTR4	Hs.225641	65979	hs|1p35.3	GO:0001755(neural crest cell migration)|GO:0001843(neural tube closure)|GO:0003779(actin binding)|GO:0005737(cytoplasm)|GO:0007266(Rho protein signal transduction)|GO:0008157(protein phosphatase 1 binding)|GO:0030027(lamellipodium)|GO:0030036(actin cytoskeleton organization)|GO:0043085(positive regulation of catalytic activity)|GO:0048484(enteric nervous system development)|GO:0051726(regulation …	2.17385	3.85003	4.23838	5.60072	4.2328	4.1365	6.96986	11.5726	14.1471	14.885	11.0061	9.85784	6	6	2.845	0.000116		phosphatase and actin regulator 4	Homo sapiens phosphatase and actin regulator 4 (PHACTR4), transcript variant 1, mRNA [NM_001048183]	AAGGTAGCCACACAATAACTCTAACTTGACTTCTAACCATTCTATCTTATTGATTTGGAG
A_23_P96761	NM_000016	ACADM	Hs.445040	34	hs|1p31.1	GO:0001889(liver development)|GO:0003995(acyl-CoA dehydrogenase activity)|GO:0005634(nucleus)|GO:0005739(mitochondrion)|GO:0005759(mitochondrial matrix)|GO:0005978(glycogen biosynthetic process)|GO:0006111(regulation of gluconeogenesis)|GO:0006635(fatty acid beta-oxidation)|GO:0009409(response to cold)|GO:0009791(post-embryonic development)|GO:0019254(carnitine metabolic process, CoA-linked)|GO:0…	0.0469264	0.320224	0.356123	0.464109	0.495783	0.30294	0.571559	0.864885	0.853504	0.934223	0.701173	0.714755	5	6	2.844	0.0322		acyl-CoA dehydrogenase, C-4 to C-12 straight chain	Homo sapiens acyl-CoA dehydrogenase, C-4 to C-12 straight chain (ACADM), transcript variant 1, mRNA [NM_000016]	TGCCAAAATCTATCAGATTTATGAAGGTACTTCACAAATTCAAAGACTTATTGTAGCCCG
A_33_P3380056	NM_001198807	MSANTD3	Hs.530272	91283	hs|9q31.1	GO:0042802(identical protein binding)	0.224236	0.324516	0.368849	0.266773	0.315467	0.283158	0.731134	0.763926	0.894542	0.907941	0.95279	0.783828	6	6	2.844	1.02e-06		Myb/SANT-like DNA-binding domain containing 3	Homo sapiens Myb/SANT-like DNA-binding domain containing 3 (MSANTD3), transcript variant 4, mRNA [NM_001198807]	TTCTTTCAAGAAAGAAAAAGAAGCCTGGAATTGTCAATCATCCTTTCTGGGACTTGGTAG
A_33_P3272553	NM_014551	NCAPH2	Hs.730607	29781	hs|22q13.33	GO:0000278(mitotic cell cycle)|GO:0005515(protein binding)|GO:0005654(nucleoplasm)|GO:0005694(chromosome)|GO:0030261(chromosome condensation)	0.280619	0.181273	0.132744	0.140403	0.0911398	0.192057	0.422297	0.332333	0.474288	0.496772	0.485555	0.544416	5	6	2.842	0.000507		non-SMC condensin II complex, subunit H2	Homo sapiens non-SMC condensin II complex, subunit H2 (NCAPH2), transcript variant 1, mRNA [NM_014551]	GTACCCAGCCTAGAGCCAAGAAATCCTTCCTTTTTATTCATTAAAACAAAATCAACCTGA
A_23_P388993	NM_033390	ZC3H12C	Hs.376289	85463	hs|11q22.3	GO:0003674(molecular_function)|GO:0004519(endonuclease activity)|GO:0005575(cellular_component)|GO:0008150(biological_process)|GO:0046872(metal ion binding)|GO:0090305(nucleic acid phosphodiester bond hydrolysis)	0.883383	1.02701	1.03443	1.09437	0.848755	0.911684	3.11504	3.04903	2.49676	3.37006	2.43875	2.13203	6	6	2.838	1.53e-06		zinc finger CCCH-type containing 12C	Homo sapiens zinc finger CCCH-type containing 12C (ZC3H12C), mRNA [NM_033390]	CCTCTGTTCTGTGTATTTCTGTAATGGAATCTTTACAATTCCCAAAACGGTATTTTAGAC
A_23_P113825	NM_144653	NACC2	Hs.112895	138151	hs|9q34.3	GO:0000790(nuclear chromatin)|GO:0000978(RNA polymerase II core promoter proximal region sequence-specific DNA binding)|GO:0001076(RNA polymerase II transcription factor binding transcription factor activity)|GO:0001078(RNA polymerase II core promoter proximal region sequence-specific DNA binding transcription factor activity involved in negative regulation of transcription)|GO:0004407(histone de…	6.97511	3.17856	3.32055	3.15495	3.38389	4.08099	9.72721	10.5136	11.9842	11.8823	9.87539	11.6037	6	6	2.836	0.000223		NACC family member 2, BEN and BTB (POZ) domain containing	Homo sapiens NACC family member 2, BEN and BTB (POZ) domain containing (NACC2), mRNA [NM_144653]	GCCACTTACCTACTGAACTGCTACTGTTGCCTGAGAAAAATGTGATTTTTATTCTGCTTG
A_23_P28733	NM_002895	RBL1	Hs.207745	5933	hs|20q11.23	GO:0000122(negative regulation of transcription from RNA polymerase II promoter)|GO:0000278(mitotic cell cycle)|GO:0005515(protein binding)|GO:0005634(nucleus)|GO:0005654(nucleoplasm)|GO:0005667(transcription factor complex)|GO:0005730(nucleolus)|GO:0006351(transcription, DNA-dependent)|GO:0006367(transcription initiation from RNA polymerase II promoter)|GO:0007179(transforming growth factor beta…	0.382764	0.304615	0.371402	0.30568	0.288621	0.310387	0.959776	0.993491	0.826216	1.08788	0.785904	0.909798	6	6	2.833	3.12e-08		retinoblastoma-like 1	Homo sapiens retinoblastoma-like 1 (RBL1), transcript variant 1, mRNA [NM_002895]	ATGCAGAATCCCCTGCCAAACGCGTCTGTCAAGAAAATGATGACGTTTTACTGAAACGAC
A_23_P204850	NM_000321	RB1	Hs.408528	5925	hs|13q14.2	GO:0000075(cell cycle checkpoint)|GO:0000082(G1/S transition of mitotic cell cycle)|GO:0000083(regulation of transcription involved in G1/S phase of mitotic cell cycle)|GO:0000278(mitotic cell cycle)|GO:0000785(chromatin)|GO:0001047(core promoter binding)|GO:0001102(RNA polymerase II activating transcription factor binding)|GO:0003677(DNA binding)|GO:0003700(sequence-specific DNA binding transcri…	2.78523	2.42742	2.19626	3.09827	2.32301	2.69819	6.9523	8.56534	5.89949	7.86189	7.47332	7.21453	6	6	2.832	5.95e-08		retinoblastoma 1	Homo sapiens retinoblastoma 1 (RB1), mRNA [NM_000321]	GTGCCAGAATTTTAGGAACTTCAGAGATCGTGTATTGAGATTTCTTAAATAATGCTTCAG
A_23_P159741	NM_017745	BCOR	Hs.659681	54880	hs|Xp11.4	GO:0000122(negative regulation of transcription from RNA polymerase II promoter)|GO:0000415(negative regulation of histone H3-K36 methylation)|GO:0003714(transcription corepressor activity)|GO:0004842(ubiquitin-protein ligase activity)|GO:0005515(protein binding)|GO:0005634(nucleus)|GO:0006351(transcription, DNA-dependent)|GO:0007507(heart development)|GO:0008134(transcription factor binding)|GO:…	0.226663	1.13275	1.0084	1.15925	0.948326	0.707645	2.11634	2.20828	2.06597	2.2471	2.27844	2.0802	6	6	2.827	0.00934		BCL6 corepressor	Homo sapiens BCL6 corepressor (BCOR), transcript variant 1, mRNA [NM_017745]	CAAGCTGGACCCACCATGTACAGTGTGTTATAGTGTTAATCCTTGTGCATATGTGTCATA
A_33_P3363630	XM_005275733	LOC100996412	Hs.25447	100996412	hs|13q14.2		0.0332552	0.0774396	0.10793	0.0894063	0.0978526	0.0639472	0.213886	0.162139	0.330597	0.228393	0.198017	0.152373	1	4	2.825	0.00088		uncharacterized LOC100996412	PREDICTED: Homo sapiens uncharacterized LOC100996412 (LOC100996412), mRNA [XM_005275733]	ATTTGGGAATTATTTGCAAAGTCACAGATCTGGACTTCTCTCTCCAGCTAAATCATGAGT
A_21_P0001706	ENST00000502767	PLEKHO1		51177	hs|1q21.2	GO:0005515(protein binding)|GO:0005634(nucleus)|GO:0005737(cytoplasm)|GO:0005886(plasma membrane)	0.165791	0.235123	0.0809844	0.0528198	0.0969484	0.101443	0.232151	0.201652	0.378691	0.377301	0.374947	0.331077	1	6	2.823	0.00316		pleckstrin homology domain containing, family O member 1	pleckstrin homology domain containing, family O member 1 [Source:HGNC Symbol;Acc:24310] [ENST00000502767]	AAGCCATGACAGCAAACAGCCCCTTTCTCCTAAGGTTCCTGATTTGAAGTGGCAAAACAA
A_33_P3412294	NM_181877	ZSCAN2	Hs.594023	54993	hs|15q25.2	GO:0003677(DNA binding)|GO:0003700(sequence-specific DNA binding transcription factor activity)|GO:0005634(nucleus)|GO:0006351(transcription, DNA-dependent)|GO:0006355(regulation of transcription, DNA-dependent)|GO:0007275(multicellular organismal development)|GO:0007283(spermatogenesis)|GO:0030154(cell differentiation)|GO:0046872(metal ion binding)	0.0272574	0.0547293	0.109987	0.110045	0.112812	0.0606554	0.24981	0.123526	0.169296	0.271022	0.211902	0.208016	3	5	2.822	0.00463		zinc finger and SCAN domain containing 2	Homo sapiens zinc finger and SCAN domain containing 2 (ZSCAN2), transcript variant 1, mRNA [NM_181877]	TTTATTTTTGAGACGGAGTCTCGCTCTGTCACCCAGGCTGGAGTGCAGTGGCGCCATCTC
A_33_P3316928	NM_020651	PELI1	Hs.7886	57162	hs|2p14	GO:0001819(positive regulation of cytokine production)|GO:0002224(toll-like receptor signaling pathway)|GO:0002755(MyD88-dependent toll-like receptor signaling pathway)|GO:0004842(ubiquitin-protein ligase activity)|GO:0005515(protein binding)|GO:0005634(nucleus)|GO:0005829(cytosol)|GO:0008063(Toll signaling pathway)|GO:0016874(ligase activity)|GO:0030890(positive regulation of B cell proliferatio…	4.45753	6.11162	4.78734	5.58035	5.76707	5.46674	12.4846	14.8787	14.7616	15.9132	16.8306	15.6385	6	6	2.818	2.27e-08		pellino E3 ubiquitin protein ligase 1	Homo sapiens pellino E3 ubiquitin protein ligase 1 (PELI1), mRNA [NM_020651]	GACTAATGCAAGAAAGCAAGTCCTGTGTTGTATTTGTTCTAGTCATTTTTATTCAGGCTA
A_24_P652700	NM_014985	CEP152	Hs.597323	22995	hs|15q21.1	GO:0000086(G2/M transition of mitotic cell cycle)|GO:0000278(mitotic cell cycle)|GO:0005515(protein binding)|GO:0005634(nucleus)|GO:0005730(nucleolus)|GO:0005813(centrosome)|GO:0005829(cytosol)|GO:0007099(centriole replication)|GO:0019901(protein kinase binding)|GO:0030030(cell projection organization)|GO:0051298(centrosome duplication)	0.124392	0.628189	0.542555	0.556891	0.503661	0.504448	1.12021	1.12484	1.27963	1.36321	1.10699	1.22904	5	6	2.816	0.00841		centrosomal protein 152kDa	Homo sapiens centrosomal protein 152kDa (CEP152), transcript variant 2, mRNA [NM_014985]	ATCCAAACAGTTTTCACCATCCGGTTATCTTTCAGATACAGAGGAAAGTAATATGATTTG
A_23_P214766	NM_006734	HIVEP2	Hs.510172	3097	hs|6q24.2	GO:0003677(DNA binding)|GO:0005634(nucleus)|GO:0005730(nucleolus)|GO:0006351(transcription, DNA-dependent)|GO:0006355(regulation of transcription, DNA-dependent)|GO:0046872(metal ion binding)	3.17118	2.19725	2.00604	1.6567	2.00775	2.25385	6.26699	5.57816	5.74411	7.00185	5.53406	6.7204	6	6	2.816	1.26e-05		human immunodeficiency virus type I enhancer binding protein 2	Homo sapiens human immunodeficiency virus type I enhancer binding protein 2 (HIVEP2), mRNA [NM_006734]	GGAATGGGGAAAAGAATCTTTCAAGGGCAAAGAACTCGTGGGAGGATGTCTGTTGTATGT
A_24_P942743	NM_003411	ZFY	Hs.522845	7544	hs|Yp11.31	GO:0003677(DNA binding)|GO:0005634(nucleus)|GO:0006351(transcription, DNA-dependent)|GO:0006355(regulation of transcription, DNA-dependent)|GO:0046872(metal ion binding)	0.108027	0.254479	0.251667	0.2789	0.274411	0.226568	0.63037	0.704302	0.595059	0.586988	0.611005	0.631953	5	6	2.816	0.000746		zinc finger protein, Y-linked	Homo sapiens zinc finger protein, Y-linked (ZFY), transcript variant 1, mRNA [NM_003411]	ACCATGTAATGGATTTTAAGAATCTGTTAGGCCTTCTTAGCCTTTATACATGTCCCTACC
A_24_P237389	NM_001412	EIF1AX	Hs.522590	1964	hs|Xp22.12	GO:0003743(translation initiation factor activity)|GO:0005829(cytosol)|GO:0006412(translation)|GO:0006413(translational initiation)|GO:0008135(translation factor activity, nucleic acid binding)|GO:0010467(gene expression)|GO:0044267(cellular protein metabolic process)	0.867371	0.728081	0.342468	0.55104	0.445098	0.397787	1.27208	2.43962	1.46536	1.37601	1.12312	1.49529	6	6	2.815	0.000284		eukaryotic translation initiation factor 1A, X-linked	Homo sapiens eukaryotic translation initiation factor 1A, X-linked (EIF1AX), mRNA [NM_001412]	GCAGTCTTTGATTCGTACAATAGAAGGAACACGTAGAATGTATATTTGTACATTCATGTC
A_32_P223464	NM_213608	C2orf66	Hs.372069	401027	hs|2q33.1	GO:0005576(extracellular region)	0.0321406	0.12052	0.106177	0.182986	0.122689	0.0648668	0.239235	0.180814	0.332914	0.252234	0.332714	0.243736	2	6	2.81	0.00737		chromosome 2 open reading frame 66	Homo sapiens chromosome 2 open reading frame 66 (C2orf66), mRNA [NM_213608]	ACGAATGAAAATCCTAGACCTCTCTCTTTCCAGTCAGAACTTACTGCTTCTGCATCTGCA
A_23_P88630	NM_000057	BLM	Hs.725208	641	hs|15q26.1	GO:0000079(regulation of cyclin-dependent protein kinase activity)|GO:0000085(G2 phase of mitotic cell cycle)|GO:0000228(nuclear chromosome)|GO:0000405(bubble DNA binding)|GO:0000723(telomere maintenance)|GO:0000724(double-strand break repair via homologous recombination)|GO:0000729(DNA double-strand break processing)|GO:0000733(DNA strand renaturation)|GO:0000781(chromosome, telomeric region)|GO…	1.4531	0.973643	0.947633	0.888691	1.12299	1.19314	3.10639	4.32779	1.75502	3.51222	2.90872	3.23303	6	6	2.806	8.22e-05		Bloom syndrome, RecQ helicase-like	Homo sapiens Bloom syndrome, RecQ helicase-like (BLM), transcript variant 1, mRNA [NM_000057]	TATGCATTCTCATAACAACCGAATCTCAATGTACATAGACCCTCTTTCTTGTTTGTCAGC
A_33_P3851513	NM_194282	LIN54	Hs.96952	132660	hs|4q21.22	GO:0000086(G2/M transition of mitotic cell cycle)|GO:0000278(mitotic cell cycle)|GO:0003677(DNA binding)|GO:0005515(protein binding)|GO:0005654(nucleoplasm)|GO:0006351(transcription, DNA-dependent)|GO:0006355(regulation of transcription, DNA-dependent)|GO:0051726(regulation of cell cycle)	0.898585	0.822097	0.912877	0.751297	0.822115	0.831451	2.41796	2.62611	1.89408	2.41232	2.22703	2.61404	6	6	2.806	9.59e-08		lin-54 homolog (C. elegans)	Homo sapiens lin-54 homolog (C. elegans) (LIN54), transcript variant 1, mRNA [NM_194282]	CTATTTGGGGAGGGTTGGGTATATAATTTTTTAGCTCTATTTACATCCCAAAGTAGAAAG
A_21_P0010997	XM_006709955	LOC100506870	Hs.503862	100506870	hs|11q23.1		5.70238	4.45836	4.64048	3.5659	4.45803	3.93408	13.6295	13.3531	12.0063	12.4632	10.4599	12.5776	6	6	2.804	6.99e-07		uncharacterized LOC100506870	PREDICTED: Homo sapiens uncharacterized LOC100506870 (LOC100506870), mRNA [XM_006709955]	CAGGAGTGAGGTTTTTATCTTTTAAAGGACAGGCCCCTACTCTCCTACGTAATGAGTTTC
A_23_P30972	NM_022091	ASCC3	Hs.486031	10973	hs|6q16.3	GO:0005515(protein binding)|GO:0005524(ATP binding)|GO:0005622(intracellular)|GO:0005634(nucleus)|GO:0005737(cytoplasm)|GO:0005794(Golgi apparatus)|GO:0006307(DNA dealkylation involved in DNA repair)|GO:0006351(transcription, DNA-dependent)|GO:0006355(regulation of transcription, DNA-dependent)|GO:0008283(cell proliferation)|GO:0032508(DNA duplex unwinding)|GO:0043140(ATP-dependent 3'-5' DNA heli…	0.255801	0.197556	0.174348	0.17811	0.192829	0.164088	0.420043	0.545074	0.614256	0.634459	0.519118	0.5201	6	6	2.803	3.72e-07		activating signal cointegrator 1 complex subunit 3	Homo sapiens activating signal cointegrator 1 complex subunit 3 (ASCC3), transcript variant 2, mRNA [NM_022091]	GAATAATAGATGGCTTTACCTCGTCTCACAGGAGCCTTGCGTTCCTTTTCAAATGTCACC
A_24_P282043	NM_006969	ZNF28	Hs.732407	7576	hs|19q13.41	GO:0003677(DNA binding)|GO:0003700(sequence-specific DNA binding transcription factor activity)|GO:0005634(nucleus)|GO:0006351(transcription, DNA-dependent)|GO:0006355(regulation of transcription, DNA-dependent)|GO:0046872(metal ion binding)	0.0324022	0.233635	0.220602	0.242209	0.0363621	0.103186	0.318288	0.307479	0.27407	0.386749	0.338765	0.209447	3	5	2.803	0.0425		zinc finger protein 28	Homo sapiens zinc finger protein 28 (ZNF28), transcript variant 1, mRNA [NM_006969]	GCCATTAGTATAGCAAGCCATCAAGCATTAATTGACATTACAGTTAAATGAGCACTGACC
A_23_P121602	NM_003864	SAP30	Hs.591715	8819	hs|4q34.1	GO:0000118(histone deacetylase complex)|GO:0000122(negative regulation of transcription from RNA polymerase II promoter)|GO:0003677(DNA binding)|GO:0003714(transcription corepressor activity)|GO:0005515(protein binding)|GO:0006351(transcription, DNA-dependent)|GO:0006355(regulation of transcription, DNA-dependent)|GO:0035914(skeletal muscle cell differentiation)|GO:0046872(metal ion binding)	1.62811	2.17522	1.85249	2.33624	2.04723	2.56502	5.25403	6.26375	6.12839	7.16346	5.30887	5.00097	6	6	2.795	4.42e-07		Sin3A-associated protein, 30kDa	Homo sapiens Sin3A-associated protein, 30kDa (SAP30), mRNA [NM_003864]	GGAGACGTGGAATTGAGACTAATAACTTGGATGTTAACACTGTTTACTGTTTTTTCACAT
A_23_P138760	NM_013246	CLCF1	Hs.502977	23529	hs|11q13.2	GO:0002639(positive regulation of immunoglobulin production)|GO:0005102(receptor binding)|GO:0005125(cytokine activity)|GO:0005127(ciliary neurotrophic factor receptor binding)|GO:0005515(protein binding)|GO:0005576(extracellular region)|GO:0007166(cell surface receptor signaling pathway)|GO:0007259(JAK-STAT cascade)|GO:0008083(growth factor activity)|GO:0008284(positive regulation of cell prolif…	0.928969	0.946711	1.08527	1.00403	0.875486	0.731691	2.67265	2.65772	2.54617	2.68661	2.06664	2.90173	6	6	2.793	7.72e-08		cardiotrophin-like cytokine factor 1	Homo sapiens cardiotrophin-like cytokine factor 1 (CLCF1), transcript variant 1, mRNA [NM_013246]	TGGCAATTCTACACAAAAAGAGATGAGATTAACAGTGCAGGGTTGGGGTCTGCATTGGAG
A_33_P3224331	NM_001122665	DDX3Y	Hs.99120	8653	hs|Yq11.21	GO:0003677(DNA binding)|GO:0003723(RNA binding)|GO:0005524(ATP binding)|GO:0005634(nucleus)|GO:0005737(cytoplasm)|GO:0006200(ATP catabolic process)|GO:0008026(ATP-dependent helicase activity)	0.839934	1.03752	0.633038	1.01385	0.838309	0.820236	2.10587	3.21234	2.19225	2.22826	1.90899	2.88564	6	6	2.792	3.21e-06		DEAD (Asp-Glu-Ala-Asp) box helicase 3, Y-linked	Homo sapiens DEAD (Asp-Glu-Ala-Asp) box helicase 3, Y-linked (DDX3Y), transcript variant 1, mRNA [NM_001122665]	GCAGTATTCTTCAGTAAATAAAGAATGGAATTGCTGAATGTAATCATTGAACCTCGAGTC
A_23_P353005	NM_152553	RNF217	Hs.368639	154214	hs|6q22.31	GO:0004842(ubiquitin-protein ligase activity)|GO:0008270(zinc ion binding)|GO:0016021(integral to membrane)|GO:0016874(ligase activity)|GO:0042787(protein ubiquitination involved in ubiquitin-dependent protein catabolic process)	0.61884	0.617409	0.658909	0.478001	0.570438	0.4593	1.53126	1.14245	1.50448	2.02297	1.46041	1.91725	6	6	2.791	3.66e-06		ring finger protein 217	Homo sapiens ring finger protein 217 (RNF217), transcript variant 2, mRNA [NM_152553]	AGACTTGGTGTTAATAGCTGAAGTCCTATCTGTACCAACAAGCAAGGCCACTTTTCAGAA
A_21_P0000040	NM_001164313	ZBTB24	Hs.409876	9841	hs|6q21	GO:0003677(DNA binding)|GO:0005515(protein binding)|GO:0005634(nucleus)|GO:0006351(transcription, DNA-dependent)|GO:0006355(regulation of transcription, DNA-dependent)|GO:0046872(metal ion binding)	0.34411	0.195234	0.191752	0.153287	0.224549	0.202465	0.519732	0.673092	0.684573	0.463466	0.600929	0.636349	6	6	2.791	4.04e-05		zinc finger and BTB domain containing 24	Homo sapiens zinc finger and BTB domain containing 24 (ZBTB24), transcript variant 2, mRNA [NM_001164313]	CAGGTAATGATGTTTTCAAAGCTGATTGCAGTGTGTTGCAGAATTGGGAGTAGTGATGAT
A_24_P16913	NM_005845	ABCC4	Hs.508423	10257	hs|13q32.1	GO:0002576(platelet degranulation)|GO:0005524(ATP binding)|GO:0005886(plasma membrane)|GO:0006200(ATP catabolic process)|GO:0007596(blood coagulation)|GO:0008150(biological_process)|GO:0016020(membrane)|GO:0016021(integral to membrane)|GO:0016404(15-hydroxyprostaglandin dehydrogenase (NAD+) activity)|GO:0030168(platelet activation)|GO:0031088(platelet dense granule membrane)|GO:0042626(ATPase act…	0.1898	0.231587	0.106084	0.265455	0.213691	0.192181	0.530068	0.667385	0.625273	0.480329	0.389655	0.579584	5	6	2.79	0.000122		ATP-binding cassette, sub-family C (CFTR/MRP), member 4	Homo sapiens ATP-binding cassette, sub-family C (CFTR/MRP), member 4 (ABCC4), transcript variant 1, mRNA [NM_005845]	CGAGAAGCTAGATCTTAACTGGTACTTAGGAATTTATTCAGGTTTAACTGTAGCTACCGT
A_23_P19673	NM_005627	SGK1	Hs.510078	6446	hs|6q23.2	GO:0001558(regulation of cell growth)|GO:0004674(protein serine/threonine kinase activity)|GO:0004712(protein serine/threonine/tyrosine kinase activity)|GO:0005246(calcium channel regulator activity)|GO:0005524(ATP binding)|GO:0005634(nucleus)|GO:0005730(nucleolus)|GO:0005737(cytoplasm)|GO:0005739(mitochondrion)|GO:0005789(endoplasmic reticulum membrane)|GO:0005829(cytosol)|GO:0005886(plasma memb…	55.8177	58.14	58.2681	55.6136	53.477	53.7387	135.984	151.803	143.917	193.468	156.639	157.648	6	6	2.788	1.16e-06		serum/glucocorticoid regulated kinase 1	Homo sapiens serum/glucocorticoid regulated kinase 1 (SGK1), transcript variant 1, mRNA [NM_005627]	GTTTTTATGGACCAATGCCCCAGTTGTCAGTCAGAGCCGTTGGTGTTTTTCATTGTTTAA
A_23_P259393	NM_016329	SFMBT1	Hs.343679	51460	hs|3p21.1	GO:0003714(transcription corepressor activity)|GO:0005515(protein binding)|GO:0005634(nucleus)|GO:0006351(transcription, DNA-dependent)|GO:0007283(spermatogenesis)|GO:0016568(chromatin modification)|GO:0030154(cell differentiation)|GO:0042393(histone binding)|GO:0045892(negative regulation of transcription, DNA-dependent)|GO:0048635(negative regulation of muscle organ development)	0.577592	0.394028	0.392955	0.320556	0.390658	0.373765	0.913123	1.00895	1.03984	1.23629	1.19161	1.3826	6	6	2.785	2.17e-06		Scm-like with four mbt domains 1	Homo sapiens Scm-like with four mbt domains 1 (SFMBT1), mRNA [NM_016329]	TGCTGGAAAGCACCCTTTTGGTTGTTTTCATTCTGTTCCCTCTCATTGTAGATTGAACTT
A_33_P3227904	NM_207348	SLC25A34	Hs.631867	284723	hs|1p36.21	GO:0005743(mitochondrial inner membrane)|GO:0006810(transport)|GO:0016021(integral to membrane)	1.01768	0.542652	0.416253	0.351474	0.574978	0.512374	1.11014	1.58005	1.48168	2.00488	1.19876	1.76807	6	6	2.782	0.00032		solute carrier family 25, member 34	Homo sapiens solute carrier family 25, member 34 (SLC25A34), mRNA [NM_207348]	CTCCCAGGAACACCTGCTACTGCACACTCCAAACCAATAAAGTTTTATATTTTGTTTACT
A_33_P3247659	NM_001110503	TMEM87A	Hs.744941	25963	hs|15q15.1	GO:0016021(integral to membrane)	0.0577442	0.277064	0.203554	0.157341	0.0960565	0.155416	0.447264	0.368297	0.435119	0.387505	0.440519	0.288997	4	6	2.781	0.00532		transmembrane protein 87A	Homo sapiens transmembrane protein 87A (TMEM87A), transcript variant 2, mRNA [NM_001110503]	CTGGGAAATATCAAACATCATCAAAATTGTTCCAGAACTGCAGTGAACTCTTTAAAACAC
A_33_P3216319	NM_015144	ZCCHC14	Hs.156231	23174	hs|16q24.2	GO:0003676(nucleic acid binding)|GO:0008270(zinc ion binding)|GO:0035091(phosphatidylinositol binding)	0.390016	0.599876	0.821796	0.805709	0.635532	0.499612	1.53232	1.66995	1.80443	1.61793	1.74607	1.74175	6	6	2.78	0.000231		zinc finger, CCHC domain containing 14	Homo sapiens zinc finger, CCHC domain containing 14 (ZCCHC14), mRNA [NM_015144]	TTTCAAGTACTTAGTCATTTTCCTGAAAGTGTGGTCTGTTTCAGAATGCTGTGGCAACCA
A_23_P308032	NM_005387	NUP98	Hs.524750	4928	hs|11p15.4	GO:0000059(protein import into nucleus, docking)|GO:0000278(mitotic cell cycle)|GO:0000776(kinetochore)|GO:0005215(transporter activity)|GO:0005515(protein binding)|GO:0005635(nuclear envelope)|GO:0005643(nuclear pore)|GO:0005654(nucleoplasm)|GO:0005829(cytosol)|GO:0005975(carbohydrate metabolic process)|GO:0006260(DNA replication)|GO:0006913(nucleocytoplasmic transport)|GO:0006999(nuclear pore o…	1.16174	0.987584	0.97956	0.900324	1.07684	1.00468	2.60489	3.01405	2.42803	3.00022	2.63615	3.33707	6	6	2.778	2.84e-08		nucleoporin 98kDa	Homo sapiens nucleoporin 98kDa (NUP98), transcript variant 3, mRNA [NM_005387]	TGGGGAGATTAGGGCCTACATTGTTTATCGCAATTACTTGTATCATTGATACGGGATTTC
A_23_P151497	NM_152307	TRMT61A	Hs.525610	115708	hs|14q32.33	GO:0005634(nucleus)|GO:0016429(tRNA (adenine-N1-)-methyltransferase activity)|GO:0030488(tRNA methylation)|GO:0031515(tRNA (m1A) methyltransferase complex)	2.69646	1.44308	1.64469	1.63753	1.62441	1.85733	4.80467	4.21822	5.10381	5.4013	4.32715	6.01107	6	6	2.778	7.96e-06		tRNA methyltransferase 61 homolog A (S. cerevisiae)	Homo sapiens tRNA methyltransferase 61 homolog A (S. cerevisiae) (TRMT61A), mRNA [NM_152307]	CCTATGTGATCACCTCTTAAAGGCTAAGCTTAGGGGCATTTCCCAAAGTGGGGACAGAGG
A_33_P3255229	BC066361	SETD7	Hs.480792	80854	hs|4q31.1	GO:0002039(p53 binding)|GO:0005515(protein binding)|GO:0005634(nucleus)|GO:0005694(chromosome)|GO:0006351(transcription, DNA-dependent)|GO:0006355(regulation of transcription, DNA-dependent)|GO:0016279(protein-lysine N-methyltransferase activity)|GO:0016568(chromatin modification)|GO:0018024(histone-lysine N-methyltransferase activity)|GO:0018026(peptidyl-lysine monomethylation)|GO:0018027(peptid…	0.191848	0.293287	0.251849	0.134958	0.188062	0.175202	0.553381	0.622924	0.648715	0.562302	0.51272	0.448156	6	6	2.777	6.48e-05		SET domain containing (lysine methyltransferase) 7	Homo sapiens cDNA clone IMAGE:5312439. [BC066361]	GAGCTTACTGCACTGTTGTTACTTGATTCTACAATTCCACTAACTGCTTTTTAAGGTATT
A_33_P3378334	NM_001042550	SMC2	Hs.119023	10592	hs|9q31.1	GO:0000228(nuclear chromosome)|GO:0000278(mitotic cell cycle)|GO:0000793(condensed chromosome)|GO:0000796(condensin complex)|GO:0005515(protein binding)|GO:0005524(ATP binding)|GO:0005634(nucleus)|GO:0005654(nucleoplasm)|GO:0005737(cytoplasm)|GO:0005829(cytosol)|GO:0007076(mitotic chromosome condensation)|GO:0010032(meiotic chromosome condensation)|GO:0045132(meiotic chromosome segregation)|GO:00…	0.167873	0.453003	0.428607	0.474942	0.354953	0.359053	1.05556	1.27678	0.88862	0.981221	0.72839	1.05718	6	6	2.777	0.000554		structural maintenance of chromosomes 2	Homo sapiens structural maintenance of chromosomes 2 (SMC2), transcript variant 1, mRNA [NM_001042550]	TCAAGGTTGCCTTGGGAAATACCTGGAAAGAAAACCTAACTGAACTTAGTGGTGGTCAGA
A_23_P252740	NM_024094	DSCC1	Hs.315167	79075	hs|8q24.12	GO:0000775(chromosome, centromeric region)|GO:0000785(chromatin)|GO:0003677(DNA binding)|GO:0005515(protein binding)|GO:0005654(nucleoplasm)|GO:0006260(DNA replication)|GO:0006275(regulation of DNA replication)|GO:0034088(maintenance of mitotic sister chromatid cohesion)|GO:0034421(post-translational protein acetylation)	0.0499566	0.13885	0.120775	0.138014	0.20264	0.13132	0.301673	0.344824	0.336543	0.418946	0.318432	0.300385	5	6	2.774	0.00242		DNA replication and sister chromatid cohesion 1	Homo sapiens DNA replication and sister chromatid cohesion 1 (DSCC1), mRNA [NM_024094]	CTTAAAAGAACAACAGTCTTTTCTTCAGGACTCAAGTTGCTTTATAAAGTTGCTGGATAC
A_23_P86283	NM_006762	LAPTM5	Hs.371021	7805	hs|1p35.2	GO:0005764(lysosome)|GO:0005765(lysosomal membrane)|GO:0005887(integral to plasma membrane)|GO:0006810(transport)	10.4232	8.16219	6.38512	8.31939	8.4993	7.97951	20.3819	19.7391	25.303	22.3551	25.561	23.721	6	6	2.768	3.99e-07		lysosomal protein transmembrane 5	Homo sapiens lysosomal protein transmembrane 5 (LAPTM5), mRNA [NM_006762]	CATCATAAAACAGTCCCTTCAAACACACAATTGTTCTGCTGAAGAGTTGTCATCAACAAT
A_24_P13032	NM_003338	UBE2D1	Hs.129683	7321	hs|10q21.1	GO:0000122(negative regulation of transcription from RNA polymerase II promoter)|GO:0000151(ubiquitin ligase complex)|GO:0000209(protein polyubiquitination)|GO:0000278(mitotic cell cycle)|GO:0002224(toll-like receptor signaling pathway)|GO:0002756(MyD88-independent toll-like receptor signaling pathway)|GO:0004842(ubiquitin-protein ligase activity)|GO:0005515(protein binding)|GO:0005524(ATP bindin…	0.671454	5.0304	4.28925	6.13433	3.54077	2.6538	9.28413	9.62469	9.04671	9.16955	8.69046	5.83395	6	6	2.768	0.0251		ubiquitin-conjugating enzyme E2D 1	Homo sapiens ubiquitin-conjugating enzyme E2D 1 (UBE2D1), transcript variant 1, mRNA [NM_003338]	CTCTACTTTGTGATCCTAATCCAGATGACCCCTTAGTACCAGATATTGCACAAATCTATA
A_33_P3242952	NM_001123168	FAM72A	Hs.661924	729533	hs|1q32.1	GO:0005739(mitochondrion)	0.217723	0.70082	0.612818	0.709151	0.485247	0.514685	1.23477	1.42202	1.61876	1.5215	1.48394	1.15034	6	6	2.764	0.00174		family with sequence similarity 72, member A	Homo sapiens family with sequence similarity 72, member A (FAM72A), mRNA [NM_001123168]	GGACACTTCTGGATGTTTCACAGCCAGGCAGTTTATGATATTAACAGACTAGACTCCACA
A_33_P3357445	NM_003211	TDG	Hs.584809	6996	hs|12q23.3	GO:0000122(negative regulation of transcription from RNA polymerase II promoter)|GO:0001104(RNA polymerase II transcription cofactor activity)|GO:0003684(damaged DNA binding)|GO:0003690(double-stranded DNA binding)|GO:0005080(protein kinase C binding)|GO:0005515(protein binding)|GO:0005634(nucleus)|GO:0005654(nucleoplasm)|GO:0005730(nucleolus)|GO:0005886(plasma membrane)|GO:0006281(DNA repair)|GO…	0.0790814	0.248879	0.183749	0.358226	0.230838	0.153539	0.59595	0.532758	0.514366	0.535865	0.429669	0.542739	5	6	2.763	0.00419		thymine-DNA glycosylase	Homo sapiens thymine-DNA glycosylase (TDG), mRNA [NM_003211]	GAACCGTATGAACCTAAGTAGTTTGGAAGAAAAAGTAGGGTTTTTGTATACTAGCTTTTG
A_33_P3213857	NM_001142279	RNASEH2B	Hs.306291	79621	hs|13q14.3	GO:0001701(in utero embryonic development)|GO:0004523(ribonuclease H activity)|GO:0005634(nucleus)|GO:0005730(nucleolus)|GO:0006401(RNA catabolic process)|GO:0009259(ribonucleotide metabolic process)|GO:0010389(regulation of G2/M transition of mitotic cell cycle)|GO:0010629(negative regulation of gene expression)|GO:0032299(ribonuclease H2 complex)|GO:0048146(positive regulation of fibroblast pro…	2.12753	2.27085	2.04432	1.90828	2.00634	1.51675	4.79532	5.7718	5.62622	5.9698	5.29189	5.17891	6	6	2.762	3.05e-07		ribonuclease H2, subunit B	Homo sapiens ribonuclease H2, subunit B (RNASEH2B), transcript variant 2, mRNA [NM_001142279]	CCCATGGTCTGATATCTGACTACATCCCTAAAGAATTAAGTGATGACTTATCTAAATACT
A_33_P3272140	NM_001287585	NUP35	Hs.180591	129401	hs|2q32.1	GO:0000278(mitotic cell cycle)|GO:0005634(nucleus)|GO:0005635(nuclear envelope)|GO:0005643(nuclear pore)|GO:0005730(nucleolus)|GO:0005886(plasma membrane)|GO:0005975(carbohydrate metabolic process)|GO:0007077(mitotic nuclear envelope disassembly)|GO:0008645(hexose transport)|GO:0010827(regulation of glucose transport)|GO:0015031(protein transport)|GO:0015758(glucose transport)|GO:0016032(viral re…	1.4199	1.69801	1.76731	1.46287	1.51821	1.58114	4.26484	4.46695	4.91433	4.12589	4.26301	4.01593	6	6	2.76	1.15e-09		nucleoporin 35kDa	Homo sapiens nucleoporin 35kDa (NUP35), transcript variant 4, mRNA [NM_001287585]	GCTTTCTGTAACAGTGCATGCTTCAGCACAGAAAACTCAGCATTGATTATTGTAAATTAA
A_23_P155989	NM_022145	CENPK	Hs.529778	64105	hs|5q12.3	GO:0000278(mitotic cell cycle)|GO:0000777(condensed chromosome kinetochore)|GO:0005654(nucleoplasm)|GO:0005829(cytosol)|GO:0006334(nucleosome assembly)|GO:0034080(CenH3-containing nucleosome assembly at centromere)|GO:0045944(positive regulation of transcription from RNA polymerase II promoter)	0.0996445	0.0940654	0.0820354	0.120833	0.118113	0.120383	0.203045	0.33867	0.321352	0.334831	0.228575	0.342161	1	5	2.756	1.06e-05		centromere protein K	Homo sapiens centromere protein K (CENPK), transcript variant 1, mRNA [NM_022145]	TTGAGGTAATATCTGAGGTGGCATAATTTAAAAATATTTAGCAAATTTGTTTCATATATA
A_23_P210747	NM_015939	TRMT6	Hs.128791	51605	hs|20p12.3	GO:0003743(translation initiation factor activity)|GO:0005634(nucleus)|GO:0006413(translational initiation)|GO:0006446(regulation of translational initiation)|GO:0008033(tRNA processing)	1.50843	1.60303	1.86127	1.84478	1.59144	1.70481	3.84182	4.78406	5.09121	5.08868	4.48788	4.58319	6	6	2.752	8.46e-09		tRNA methyltransferase 6 homolog (S. cerevisiae)	Homo sapiens tRNA methyltransferase 6 homolog (S. cerevisiae) (TRMT6), transcript variant 1, mRNA [NM_015939]	TACCGAAAGGAGGGCAATTCATGGAAGAAATTTCCTCTGTTCATTCCGTTCTCTTCAACC
A_23_P66891	NM_012121	CDC42EP4	Hs.3903	23580	hs|17q25.1	GO:0005737(cytoplasm)|GO:0005886(plasma membrane)|GO:0007266(Rho protein signal transduction)|GO:0008360(regulation of cell shape)|GO:0012505(endomembrane system)|GO:0015629(actin cytoskeleton)|GO:0015630(microtubule cytoskeleton)|GO:0017049(GTP-Rho binding)|GO:0031274(positive regulation of pseudopodium assembly)	1.49563	2.04341	1.81575	2.22586	1.95547	1.89459	5.02947	4.99778	5.53304	6.04918	4.35844	5.3987	6	6	2.75	8.59e-08		CDC42 effector protein (Rho GTPase binding) 4	Homo sapiens CDC42 effector protein (Rho GTPase binding) 4 (CDC42EP4), mRNA [NM_012121]	TGCCCCACGCAATATTTGGAACACTTATGTGAAAAATGATTTGTTTTTCTGAAATTCACG
A_33_P3377691	NM_001008393	C4orf46	Hs.380920	201725	hs|4q32.1		0.417962	0.636276	0.562609	0.536199	0.566047	0.560077	1.53665	1.78197	1.14473	1.63014	1.44921	1.47897	6	6	2.748	2.79e-07		chromosome 4 open reading frame 46	Homo sapiens chromosome 4 open reading frame 46 (C4orf46), transcript variant 1, mRNA [NM_001008393]	GGGACAGATGGATGGGCAAAGAATAGTTTTGTTTAACATATTAGGTCATAGTTCTTGATT
A_23_P162734	NM_005977	RNF6	Hs.136885	6049	hs|13q12.13	GO:0003677(DNA binding)|GO:0004842(ubiquitin-protein ligase activity)|GO:0005515(protein binding)|GO:0005634(nucleus)|GO:0005737(cytoplasm)|GO:0006355(regulation of transcription, DNA-dependent)|GO:0006511(ubiquitin-dependent protein catabolic process)|GO:0008270(zinc ion binding)|GO:0016605(PML body)|GO:0016874(ligase activity)|GO:0030424(axon)|GO:0030517(negative regulation of axon extension)|G…	2.06663	2.7519	2.80022	3.51553	3.02935	2.87972	6.49414	8.30769	7.21731	8.91829	7.34056	8.24583	6	6	2.748	1.14e-06		ring finger protein (C3H2C3 type) 6	Homo sapiens ring finger protein (C3H2C3 type) 6 (RNF6), transcript variant 1, mRNA [NM_005977]	CTGCATATGGCACAATGTTTAATATTGGCAAGTTCATCTCAGAGAAAGGGGATTCAGATA
A_33_P3253807	NM_001806	CEBPG	Hs.429666	1054	hs|19q13.11	GO:0001889(liver development)|GO:0003677(DNA binding)|GO:0003690(double-stranded DNA binding)|GO:0003700(sequence-specific DNA binding transcription factor activity)|GO:0005515(protein binding)|GO:0005634(nucleus)|GO:0005730(nucleolus)|GO:0006351(transcription, DNA-dependent)|GO:0006357(regulation of transcription from RNA polymerase II promoter)|GO:0006955(immune response)|GO:0008134(transcripti…	6.35722	3.63923	3.74328	3.57188	4.17162	4.07968	9.74059	11.6034	11.7045	12.7008	11.1844	12.0464	6	6	2.747	1.99e-05		CCAAT/enhancer binding protein (C/EBP), gamma	Homo sapiens CCAAT/enhancer binding protein (C/EBP), gamma (CEBPG), transcript variant 1, mRNA [NM_001806]	GGAAAAAGTACTAACTTGTTCTTTTTGTTCCTGGCTTTCATCAGTTTGTGAGATTTCTCT
A_23_P137173	NM_021992	TMSB15A	Hs.56145	11013	hs|Xq22.1	GO:0003779(actin binding)|GO:0005737(cytoplasm)|GO:0005856(cytoskeleton)|GO:0030036(actin cytoskeleton organization)|GO:0042989(sequestering of actin monomers)	0.618147	0.767021	0.735047	0.436154	0.657824	0.538738	1.51605	1.83872	1.86578	1.67916	1.63728	1.61867	6	6	2.747	2.13e-05		thymosin beta 15a	Homo sapiens thymosin beta 15a (TMSB15A), mRNA [NM_021992]	TGTAGTTCTTGCATCCTATACTGGATAAGCCTGTTTTAACCTGCTATGATGGGTGCTTCC
A_23_P102037	NM_025147	COQ10B	Hs.606592	80219	hs|2q33.1	GO:0005743(mitochondrial inner membrane)	0.37716	1.33518	1.92229	1.57219	1.42898	1.50587	3.20559	3.49146	3.83746	3.44432	3.92393	2.40329	6	6	2.743	0.00714		coenzyme Q10 homolog B (S. cerevisiae)	Homo sapiens coenzyme Q10 homolog B (S. cerevisiae) (COQ10B), mRNA [NM_025147]	CATCACCATTGCTAGAATACTGGCATGATTCTTCTGAGCAGAAGTTGAAACTGTAAATTT
A_33_P3461416	NM_001083899	GP6	Hs.661752	51206	hs|19q13.42	GO:0004872(receptor activity)|GO:0004888(transmembrane signaling receptor activity)|GO:0005515(protein binding)|GO:0005518(collagen binding)|GO:0005886(plasma membrane)|GO:0005887(integral to plasma membrane)|GO:0007167(enzyme linked receptor protein signaling pathway)|GO:0007596(blood coagulation)|GO:0030168(platelet activation)|GO:0050900(leukocyte migration)|GO:0070062(extracellular vesicular …	0.505107	0.380615	0.306561	0.318186	0.335381	0.397302	1.00898	1.10717	1.11223	0.856285	1.08915	0.911672	6	6	2.74	2.52e-06		glycoprotein VI (platelet)	Homo sapiens glycoprotein VI (platelet) (GP6), transcript variant 1, mRNA [NM_001083899]	CCTGATTTGATCATAGCACGTTGTATACATGTACTGCAATATTGCTGTCCACCCCATAAA
A_33_P3305203	AK095276	LOC283588	Hs.46519	283588	hs|14q32.11		0.208533	0.106158	0.0648293	0.0547672	0.102517	0.0728843	0.17931	0.22327	0.209862	0.232777	0.409337	0.310634	1	6	2.74	0.00212		uncharacterized LOC283588	Homo sapiens cDNA FLJ37957 fis, clone CTONG2009529. [AK095276]	CAGTAAGGGCTTACTTTTTACCAACTTGTGTGTGTGTAAAGATGTATTTGTTCAAGCTTT
A_23_P58506	NM_012081	ELL2	Hs.192221	22936	hs|5q15	GO:0005634(nucleus)|GO:0005730(nucleolus)|GO:0005737(cytoplasm)|GO:0005813(centrosome)|GO:0006355(regulation of transcription, DNA-dependent)|GO:0006368(transcription elongation from RNA polymerase II promoter)|GO:0008023(transcription elongation factor complex)	4.89343	2.42898	2.49475	1.87008	2.10178	2.69932	7.68559	7.56859	5.96159	7.31098	6.72889	7.74249	6	6	2.736	0.000436		elongation factor, RNA polymerase II, 2	Homo sapiens elongation factor, RNA polymerase II, 2 (ELL2), mRNA [NM_012081]	TTTTCAGTTGTTACAGAGCTCAGCAGCTGTGGTTGCCCCTGTTCTACACCAATTTCAGTT
A_23_P139687	NM_152321	ERP27	Hs.162143	121506	hs|12p12.3	GO:0003756(protein disulfide isomerase activity)|GO:0005783(endoplasmic reticulum)|GO:0005788(endoplasmic reticulum lumen)|GO:0006457(protein folding)|GO:0009986(cell surface)|GO:0034976(response to endoplasmic reticulum stress)	0.17972	0.107173	0.142392	0.125742	0.186706	0.154172	0.352107	0.459548	0.394525	0.440881	0.372364	0.393979	6	6	2.732	1.36e-05		endoplasmic reticulum protein 27	Homo sapiens endoplasmic reticulum protein 27 (ERP27), mRNA [NM_152321]	TTTTAAGGTTACCTAAGGGTTGAAACTCTACCTTCTTTCATAAGCACATGTCCGTCTCTG
A_24_P258051	NM_032844	MASTL	Hs.276905	84930	hs|10p12.1	GO:0000086(G2/M transition of mitotic cell cycle)|GO:0000278(mitotic cell cycle)|GO:0004674(protein serine/threonine kinase activity)|GO:0005524(ATP binding)|GO:0005634(nucleus)|GO:0005654(nucleoplasm)|GO:0005737(cytoplasm)|GO:0005813(centrosome)|GO:0006468(protein phosphorylation)|GO:0006974(response to DNA damage stimulus)|GO:0007067(mitosis)|GO:0016301(kinase activity)|GO:0032154(cleavage furr…	0.367352	0.911901	0.992333	0.837248	0.749786	0.588045	2.09595	1.76314	1.95532	1.95146	2.1787	1.65293	6	6	2.73	0.000758		microtubule associated serine/threonine kinase-like	Homo sapiens microtubule associated serine/threonine kinase-like (MASTL), transcript variant 2, mRNA [NM_032844]	GCCTACAGTGGTTCATATCCCATGGCTATAACCCCTACTCAAAAAAGAAGATCCTGTATG
A_23_P19020	NM_005460	SNCAIP	Hs.426463	9627	hs|5q23.2	GO:0005515(protein binding)|GO:0005737(cytoplasm)|GO:0008219(cell death)|GO:0031625(ubiquitin protein ligase binding)|GO:0042417(dopamine metabolic process)|GO:0042734(presynaptic membrane)|GO:0042802(identical protein binding)|GO:0043025(neuronal cell body)|GO:0046928(regulation of neurotransmitter secretion)|GO:0090083(regulation of inclusion body assembly)	1.14271	1.00816	1.07334	1.2091	1.1699	1.0446	2.74782	2.92487	2.74205	3.67091	2.86252	3.26703	6	6	2.73	5.64e-08		synuclein, alpha interacting protein	Homo sapiens synuclein, alpha interacting protein (SNCAIP), transcript variant 1, mRNA [NM_005460]	ATGCCTCACCAGCAGAAGAACAGAATATCAGGATGCCTTAAATTTATAGTAGTAGACTGT
A_24_P414712	NM_015695	BRPF3	Hs.520096	27154	hs|6p21.31	GO:0002576(platelet degranulation)|GO:0005515(protein binding)|GO:0005576(extracellular region)|GO:0005829(cytosol)|GO:0007596(blood coagulation)|GO:0008270(zinc ion binding)|GO:0030168(platelet activation)|GO:0043966(histone H3 acetylation)|GO:0070776(MOZ/MORF histone acetyltransferase complex)	0.0615914	0.143857	0.084142	0.235561	0.136801	0.110007	0.313068	0.431301	0.233234	0.454374	0.209532	0.362363	4	6	2.727	0.0019		bromodomain and PHD finger containing, 3	Homo sapiens bromodomain and PHD finger containing, 3 (BRPF3), mRNA [NM_015695]	AGGATGGGGTTTTGGATTTTGTATAATAATAAAAACAATACAGCATATGGCTAGGGAAGG
A_23_P18579	NM_006607	PTTG2	Hs.668806	10744	hs|4p14	GO:0003674(molecular_function)|GO:0005634(nucleus)|GO:0005737(cytoplasm)|GO:0017124(SH3 domain binding)|GO:0051276(chromosome organization)	10.7322	11.5103	11.0709	10.6643	11.2096	11.8508	27.8092	28.7208	32.6996	36.0065	30.2863	27.8807	6	6	2.725	2.11e-07		pituitary tumor-transforming 2	Homo sapiens pituitary tumor-transforming 2 (PTTG2), mRNA [NM_006607]	AGACTGTTAAAACAAAAAGTTCTGTTCCTGCCTCAGATGACGCCTATCCAGAAATAGAAA
A_23_P104762	NM_006106	YAP1	Hs.503692	10413	hs|11q22.2	GO:0001076(RNA polymerase II transcription factor binding transcription factor activity)|GO:0001570(vasculogenesis)|GO:0003143(embryonic heart tube morphogenesis)|GO:0003682(chromatin binding)|GO:0003713(transcription coactivator activity)|GO:0003714(transcription corepressor activity)|GO:0005515(protein binding)|GO:0005634(nucleus)|GO:0005654(nucleoplasm)|GO:0005667(transcription factor complex)…	0.373027	0.433077	0.42721	0.457809	0.435884	0.369558	0.993942	1.14258	1.19855	1.22332	1.02497	1.21399	6	6	2.722	3.01e-09		Yes-associated protein 1	Homo sapiens Yes-associated protein 1 (YAP1), transcript variant 2, mRNA [NM_006106]	AGCTTTGAGTTCTGACATCCTTAATGACATGGAGTCTGTTTTGGCTGCCACCAAGCTAGA
[truncated: 2,230 more rows]
