# Supplementary material for: Angiogenic Transformation in Human Brain Micro Endothelial Cells: Whole Genome DNA Methylation and Transcriptomic Analysis
Source: Front Physiol. 2019 Dec 11;10:1502. doi: 10.3389/fphys.2019.01502 (PMC6917667; doi:10.3389/fphys.2019.01502)
Supplement: TABLE S3 — Enlists genes commonly altered as a result of capillary tube formation in the present study conducted on HBMECs and a similar study (GSE7507) conducted on HUVECs. [file Table_3.XLSX]

## Sheet: Comparison 
Supplemental Table S3: Enlists genes commonly altered as a result of capillary tube formation in the present study conducted on HBMECs and a similar study (GSE7507) conducted on HUVECs.
GeneSymbol	GeneName	Present Study	P-value	GSE7507	P-Value	GO
MAP3K8	mitogen-activated protein kinase kinase kinase 8	29.42	2.52e-06	3.06159	0.00671993	GO:0000165(MAPK cascade)|GO:0000186(activation of MAPKK activity)|GO:0000287(magnesium ion binding)|GO:0004674(protein serine/threonine kinase activity)|GO:0004709(MAP kinase kinase kinase activity)|GO:0005515(protein binding)|GO:0005524(ATP binding)|GO:0005737(cytoplasm)|GO:0005829(cytosol)|GO:0006468(protein phosphorylation)|GO:0007049(cell cycle)|GO:0031295(T cell costimulation)
FLT1	fms-related tyrosine kinase 1	12.16	1.09e-08	3.29556	0.00282135	GO:0001569(patterning of blood vessels)|GO:0002040(sprouting angiogenesis)|GO:0002548(monocyte chemotaxis)|GO:0004714(transmembrane receptor protein tyrosine kinase activity)|GO:0005021(vascular endothelial growth factor-activated receptor activity)|GO:0005515(protein binding)|GO:0005524(ATP binding)|GO:0005615(extracellular space)|GO:0005768(endosome)|GO:0005886(plasma membrane)|GO:0005887(integ…
SAT1	spermidine/spermine N1-acetyltransferase 1	11.41	6.99e-05	2.19845	0.0110196	GO:0001525(angiogenesis)|GO:0004145(diamine N-acetyltransferase activity)|GO:0005515(protein binding)|GO:0005622(intracellular)|GO:0005829(cytosol)|GO:0006595(polyamine metabolic process)|GO:0006596(polyamine biosynthetic process)|GO:0009447(putrescine catabolic process)|GO:0019809(spermidine binding)|GO:0032918(spermidine acetylation)|GO:0034641(cellular nitrogen compound metabolic process)|GO:0…
PPP1R3C	protein phosphatase 1, regulatory subunit 3C	9.524	8.27e-06	5.1873	0.0040311	GO:0004722(protein serine/threonine phosphatase activity)|GO:0005515(protein binding)|GO:0005829(cytosol)|GO:0005975(carbohydrate metabolic process)|GO:0005978(glycogen biosynthetic process)|GO:0006006(glucose metabolic process)|GO:0016311(dephosphorylation)|GO:0019903(protein phosphatase binding)|GO:0044281(small molecule metabolic process)
FZD1	frizzled class receptor 1	5.965	5e-06	4.47272	0.000937393	GO:0001934(positive regulation of protein phosphorylation)|GO:0001944(vasculature development)|GO:0003149(membranous septum morphogenesis)|GO:0003150(muscular septum morphogenesis)|GO:0003151(outflow tract morphogenesis)|GO:0004930(G-protein coupled receptor activity)|GO:0005102(receptor binding)|GO:0005109(frizzled binding)|GO:0005515(protein binding)|GO:0005737(cytoplasm)|GO:0005886(plasma memb…
PLAC8	placenta-specific 8	4.698	2.48e-05	3.74306	0.0190329	GO:0003682(chromatin binding)|GO:0008284(positive regulation of cell proliferation)|GO:0009409(response to cold)|GO:0040015(negative regulation of multicellular organism growth)|GO:0042742(defense response to bacterium)|GO:0043066(negative regulation of apoptotic process)|GO:0045944(positive regulation of transcription from RNA polymerase II promoter)|GO:0050873(brown fat cell differentiation)
BAMBI	BMP and activin membrane-bound inhibitor	4.561	1.82e-06	3.14325	0.0136882	GO:0005109(frizzled binding)|GO:0005114(type II transforming growth factor beta receptor binding)|GO:0005737(cytoplasm)|GO:0005886(plasma membrane)|GO:0007179(transforming growth factor beta receptor signaling pathway)|GO:0008284(positive regulation of cell proliferation)|GO:0008360(regulation of cell shape)|GO:0010718(positive regulation of epithelial to mesenchymal transition)|GO:0016021(integr…
FOXC1	forkhead box C1	4.456	8.4e-10	2.45162	0.000668702	GO:0000122(negative regulation of transcription from RNA polymerase II promoter)|GO:0000977(RNA polymerase II regulatory region sequence-specific DNA binding)|GO:0001501(skeletal system development)|GO:0001503(ossification)|GO:0001541(ovarian follicle development)|GO:0001654(eye development)|GO:0001657(ureteric bud development)|GO:0001701(in utero embryonic development)|GO:0001756(somitogenesis)|…
PLA2G4A	phospholipase A2, group IVA (cytosolic, calcium-dependent)	4.414	1.06e-08	2.29411	0.0102652	GO:0004622(lysophospholipase activity)|GO:0004623(phospholipase A2 activity)|GO:0005509(calcium ion binding)|GO:0005544(calcium-dependent phospholipid binding)|GO:0005737(cytoplasm)|GO:0005743(mitochondrial inner membrane)|GO:0005789(endoplasmic reticulum membrane)|GO:0005794(Golgi apparatus)|GO:0005829(cytosol)|GO:0006644(phospholipid metabolic process)|GO:0006654(phosphatidic acid biosynthetic …
PITPNC1	phosphatidylinositol transfer protein, cytoplasmic 1	4.308	9.33e-10	3.47071	0.0290559	GO:0005515(protein binding)|GO:0005737(cytoplasm)|GO:0007165(signal transduction)|GO:0008289(lipid binding)|GO:0008526(phosphatidylinositol transporter activity)|GO:0015914(phospholipid transport)
AKR1B10	aldo-keto reductase family 1, member B10 (aldose reductase)	4.196	2.82e-10	3.60408	0.0444216	GO:0001523(retinoid metabolic process)|GO:0001758(retinal dehydrogenase activity)|GO:0004033(aldo-keto reductase (NADP) activity)|GO:0005515(protein binding)|GO:0005764(lysosome)|GO:0005829(cytosol)|GO:0006081(cellular aldehyde metabolic process)|GO:0007586(digestion)|GO:0007603(phototransduction, visible light)|GO:0008202(steroid metabolic process)|GO:0016488(farnesol catabolic process)|GO:00445…
SLC7A2	solute carrier family 7 (cationic amino acid transporter, y+ system), member 2	4.174	2.74e-06	5.72409	0.0116902	GO:0000064(L-ornithine transmembrane transporter activity)|GO:0002537(nitric oxide production involved in inflammatory response)|GO:0005289(high affinity arginine transmembrane transporter activity)|GO:0005886(plasma membrane)|GO:0005887(integral to plasma membrane)|GO:0006520(cellular amino acid metabolic process)|GO:0006809(nitric oxide biosynthetic process)|GO:0006810(transport)|GO:0006811(ion…
RGS2	regulator of G-protein signaling 2, 24kDa	3.987	2.48e-07	14.559	0.00417219	GO:0005096(GTPase activator activity)|GO:0005515(protein binding)|GO:0005516(calmodulin binding)|GO:0005730(nucleolus)|GO:0005737(cytoplasm)|GO:0005739(mitochondrion)|GO:0005829(cytosol)|GO:0005886(plasma membrane)|GO:0006417(regulation of translation)|GO:0007049(cell cycle)|GO:0007283(spermatogenesis)|GO:0008277(regulation of G-protein coupled receptor protein signaling pathway)|GO:0009898(inter…
GREM1	gremlin 1, DAN family BMP antagonist	3.976	0.000147	4.0105	0.00607813	GO:0000902(cell morphogenesis)|GO:0001658(branching involved in ureteric bud morphogenesis)|GO:0002042(cell migration involved in sprouting angiogenesis)|GO:0002092(positive regulation of receptor internalization)|GO:0003257(positive regulation of transcription from RNA polymerase II promoter involved in myocardial precursor cell differentiation)|GO:0003337(mesenchymal to epithelial transition in…
MTMR6	myotubularin related protein 6	3.879	0.00386	3.18192	0.0139002	GO:0004722(protein serine/threonine phosphatase activity)|GO:0004725(protein tyrosine phosphatase activity)|GO:0005635(nuclear envelope)|GO:0005737(cytoplasm)|GO:0005829(cytosol)|GO:0006470(protein dephosphorylation)|GO:0006644(phospholipid metabolic process)|GO:0006661(phosphatidylinositol biosynthetic process)|GO:0015269(calcium-activated potassium channel activity)|GO:0035335(peptidyl-tyrosine…
CEBPB	CCAAT/enhancer binding protein (C/EBP), beta	3.743	4.29e-07	2.23173	0.0309433	GO:0000790(nuclear chromatin)|GO:0001077(RNA polymerase II core promoter proximal region sequence-specific DNA binding transcription factor activity involved in positive regulation of transcription)|GO:0001892(embryonic placenta development)|GO:0003677(DNA binding)|GO:0003700(sequence-specific DNA binding transcription factor activity)|GO:0003705(RNA polymerase II distal enhancer sequence-specifi…
NOV	nephroblastoma overexpressed	3.615	1.83e-07	2.48602	0.016595	GO:0001558(regulation of cell growth)|GO:0005520(insulin-like growth factor binding)|GO:0005576(extracellular region)|GO:0008083(growth factor activity)|GO:0010468(regulation of gene expression)|GO:0030424(axon)|GO:0030425(dendrite)|GO:0031012(extracellular matrix)|GO:0043025(neuronal cell body)|GO:0043231(intracellular membrane-bounded organelle)
EMP2	epithelial membrane protein 2	3.614	3.24e-11	3.69696	0.00124239	GO:0001954(positive regulation of cell-matrix adhesion)|GO:0005178(integrin binding)|GO:0008283(cell proliferation)|GO:0016021(integral to membrane)|GO:0016324(apical plasma membrane)|GO:2001046(positive regulation of integrin-mediated signaling pathway)
MMP10	matrix metallopeptidase 10 (stromelysin 2)	3.517	7.38e-08	11.2053	0.0126387	GO:0004222(metalloendopeptidase activity)|GO:0005509(calcium ion binding)|GO:0005576(extracellular region)|GO:0005578(proteinaceous extracellular matrix)|GO:0005615(extracellular space)|GO:0006508(proteolysis)|GO:0008270(zinc ion binding)|GO:0022617(extracellular matrix disassembly)|GO:0030198(extracellular matrix organization)|GO:0030334(regulation of cell migration)|GO:0030574(collagen cataboli…
IL13RA2	interleukin 13 receptor, alpha 2	3.417	0.00293	3.42952	0.00132453	GO:0004871(signal transducer activity)|GO:0004896(cytokine receptor activity)|GO:0005615(extracellular space)|GO:0007165(signal transduction)|GO:0016021(integral to membrane)|GO:0019221(cytokine-mediated signaling pathway)
TSC22D1	TSC22 domain family, member 1	3.007	1.18e-06	3.37339	0.000473469	GO:0003700(sequence-specific DNA binding transcription factor activity)|GO:0005515(protein binding)|GO:0005634(nucleus)|GO:0005737(cytoplasm)|GO:0006355(regulation of transcription, DNA-dependent)|GO:0006366(transcription from RNA polymerase II promoter)|GO:0008284(positive regulation of cell proliferation)|GO:0043065(positive regulation of apoptotic process)|GO:0043066(negative regulation of apo…
NFIL3	nuclear factor, interleukin 3 regulated	2.941	0.000227	4.54756	0.0201887	GO:0000122(negative regulation of transcription from RNA polymerase II promoter)|GO:0000977(RNA polymerase II regulatory region sequence-specific DNA binding)|GO:0000979(RNA polymerase II core promoter sequence-specific DNA binding)|GO:0001078(RNA polymerase II core promoter proximal region sequence-specific DNA binding transcription factor activity involved in negative regulation of transcriptio…
ACADM	acyl-CoA dehydrogenase, C-4 to C-12 straight chain	2.844	0.0322	3.35762	0.00540645	GO:0001889(liver development)|GO:0003995(acyl-CoA dehydrogenase activity)|GO:0005634(nucleus)|GO:0005739(mitochondrion)|GO:0005759(mitochondrial matrix)|GO:0005978(glycogen biosynthetic process)|GO:0006111(regulation of gluconeogenesis)|GO:0006635(fatty acid beta-oxidation)|GO:0009409(response to cold)|GO:0009791(post-embryonic development)|GO:0019254(carnitine metabolic process, CoA-linked)|GO:0…
RB1	retinoblastoma 1	2.832	5.95e-08	2.24041	0.0282815	GO:0000075(cell cycle checkpoint)|GO:0000082(G1/S transition of mitotic cell cycle)|GO:0000083(regulation of transcription involved in G1/S phase of mitotic cell cycle)|GO:0000278(mitotic cell cycle)|GO:0000785(chromatin)|GO:0001047(core promoter binding)|GO:0001102(RNA polymerase II activating transcription factor binding)|GO:0003677(DNA binding)|GO:0003700(sequence-specific DNA binding transcri…
FNDC3A	fibronectin type III domain containing 3A	2.71	6.04e-09	2.69799	0.00128006	GO:0000139(Golgi membrane)|GO:0001669(acrosomal vesicle)|GO:0005794(Golgi apparatus)|GO:0005829(cytosol)|GO:0007286(spermatid development)|GO:0009566(fertilization)|GO:0012506(vesicle membrane)|GO:0016021(integral to membrane)|GO:0016337(cell-cell adhesion)|GO:0060009(Sertoli cell development)
CNP	2',3'-cyclic nucleotide 3' phosphodiesterase	2.663	0.00103	2.17654	0.0139877	GO:0000226(microtubule cytoskeleton organization)|GO:0003723(RNA binding)|GO:0004113(2',3'-cyclic-nucleotide 3'-phosphodiesterase activity)|GO:0005615(extracellular space)|GO:0005634(nucleus)|GO:0005730(nucleolus)|GO:0005737(cytoplasm)|GO:0005741(mitochondrial outer membrane)|GO:0005743(mitochondrial inner membrane)|GO:0005874(microtubule)|GO:0005886(plasma membrane)|GO:0005902(microvillus)|GO:00…
SLC2A3	solute carrier family 2 (facilitated glucose transporter), member 3	2.574	0.000108	2.64033	0.0389359	GO:0005355(glucose transmembrane transporter activity)|GO:0005886(plasma membrane)|GO:0005975(carbohydrate metabolic process)|GO:0006766(vitamin metabolic process)|GO:0006767(water-soluble vitamin metabolic process)|GO:0008645(hexose transport)|GO:0015758(glucose transport)|GO:0016021(integral to membrane)|GO:0019852(L-ascorbic acid metabolic process)|GO:0044281(small molecule metabolic process)|…
ERO1LB	ERO1-like beta (S. cerevisiae)	2.334	8.88e-05	2.5817	0.0403623	GO:0003756(protein disulfide isomerase activity)|GO:0005515(protein binding)|GO:0005783(endoplasmic reticulum)|GO:0005789(endoplasmic reticulum membrane)|GO:0006457(protein folding)|GO:0016491(oxidoreductase activity)|GO:0016671(oxidoreductase activity, acting on a sulfur group of donors, disulfide as acceptor)|GO:0051082(unfolded protein binding)|GO:0055114(oxidation-reduction process)
PKIG	protein kinase (cAMP-dependent, catalytic) inhibitor gamma	2.292	0.00859	4.7265	0.00016473	GO:0000122(negative regulation of transcription from RNA polymerase II promoter)|GO:0004862(cAMP-dependent protein kinase inhibitor activity)|GO:0007165(signal transduction)|GO:0042308(negative regulation of protein import into nucleus)|GO:0071901(negative regulation of protein serine/threonine kinase activity)
STEAP3	STEAP family member 3, metalloreductase	2.284	1.03e-05	4.36502	0.0181061	GO:0000293(ferric-chelate reductase activity)|GO:0005515(protein binding)|GO:0005771(multivesicular body)|GO:0005886(plasma membrane)|GO:0006879(cellular iron ion homeostasis)|GO:0006915(apoptotic process)|GO:0007049(cell cycle)|GO:0009306(protein secretion)|GO:0010008(endosome membrane)|GO:0016021(integral to membrane)|GO:0033572(transferrin transport)|GO:0043065(positive regulation of apoptotic…
DNAJA4	DnaJ (Hsp40) homolog, subfamily A, member 4	2.246	1.76e-05	2.00724	0.000366179	GO:0005524(ATP binding)|GO:0005829(cytosol)|GO:0009408(response to heat)|GO:0016020(membrane)|GO:0031072(heat shock protein binding)|GO:0042026(protein refolding)|GO:0046872(metal ion binding)|GO:0051082(unfolded protein binding)|GO:0051087(chaperone binding)|GO:0090084(negative regulation of inclusion body assembly)
PTGS1	prostaglandin-endoperoxide synthase 1 (prostaglandin G/H synthase and cyclooxygenase)	2.237	1.08e-05	2.39036	0.00454127	GO:0001516(prostaglandin biosynthetic process)|GO:0001750(photoreceptor outer segment)|GO:0004601(peroxidase activity)|GO:0004666(prostaglandin-endoperoxide synthase activity)|GO:0005634(nucleus)|GO:0005737(cytoplasm)|GO:0005789(endoplasmic reticulum membrane)|GO:0006629(lipid metabolic process)|GO:0006805(xenobiotic metabolic process)|GO:0006979(response to oxidative stress)|GO:0008217(regulatio…
GLRX2	glutaredoxin 2	2.196	6.84e-07	2.1982	0.0243543	GO:0003756(protein disulfide isomerase activity)|GO:0005634(nucleus)|GO:0005730(nucleolus)|GO:0005739(mitochondrion)|GO:0006355(regulation of transcription, DNA-dependent)|GO:0006457(protein folding)|GO:0006749(glutathione metabolic process)|GO:0006915(apoptotic process)|GO:0008794(arsenate reductase (glutaredoxin) activity)|GO:0009055(electron carrier activity)|GO:0009266(response to temperature…
MYLIP	myosin regulatory light chain interacting protein	2.142	8.46e-08	3.05362	0.0219741	GO:0004842(ubiquitin-protein ligase activity)|GO:0005515(protein binding)|GO:0005622(intracellular)|GO:0005737(cytoplasm)|GO:0005856(cytoskeleton)|GO:0005886(plasma membrane)|GO:0006928(cellular component movement)|GO:0007399(nervous system development)|GO:0008092(cytoskeletal protein binding)|GO:0008270(zinc ion binding)|GO:0010989(negative regulation of low-density lipoprotein particle clearanc…
TRAF3IP2	TRAF3 interacting protein 2	2.142	0.000479	3.54811	0.00188474	GO:0001783(B cell apoptotic process)|GO:0005515(protein binding)|GO:0005575(cellular_component)|GO:0006959(humoral immune response)|GO:0035556(intracellular signal transduction)|GO:0043123(positive regulation of I-kappaB kinase/NF-kappaB cascade)|GO:0048305(immunoglobulin secretion)
ARHGAP24	Rho GTPase activating protein 24	2.083	1.6e-06	2.02608	0.0022536	GO:0001525(angiogenesis)|GO:0005515(protein binding)|GO:0005829(cytosol)|GO:0005856(cytoskeleton)|GO:0005925(focal adhesion)|GO:0007264(small GTPase mediated signal transduction)|GO:0030154(cell differentiation)|GO:0030675(Rac GTPase activator activity)|GO:0032863(activation of Rac GTPase activity)|GO:0035021(negative regulation of Rac protein signal transduction)|GO:0035313(wound healing, spread…
SUSD4	sushi domain containing 4	2.074	0.018	6.70893	0.000147721	GO:0016021(integral to membrane)
GBP6	guanylate binding protein family, member 6	2.012	0.00167	3.66268	0.00953273	GO:0003924(GTPase activity)|GO:0005525(GTP binding)|GO:0006184(GTP catabolic process)|GO:0006955(immune response)|GO:0042742(defense response to bacterium)|GO:0070062(extracellular vesicular exosome)|GO:0071346(cellular response to interferon-gamma)
SRGN	serglycin	2.009	0.00494	2.40509	0.00827529	GO:0002576(platelet degranulation)|GO:0005515(protein binding)|GO:0005518(collagen binding)|GO:0005576(extracellular region)|GO:0005615(extracellular space)|GO:0005794(Golgi apparatus)|GO:0007596(blood coagulation)|GO:0008626(induction of apoptosis by granzyme)|GO:0016485(protein processing)|GO:0030168(platelet activation)|GO:0030502(negative regulation of bone mineralization)|GO:0031093(platelet…
PTPN4	protein tyrosine phosphatase, non-receptor type 4 (megakaryocyte)	0.489	0.0351	0.335614	0.0164437	GO:0004726(non-membrane spanning protein tyrosine phosphatase activity)|GO:0005515(protein binding)|GO:0005737(cytoplasm)|GO:0005856(cytoskeleton)|GO:0006470(protein dephosphorylation)|GO:0008092(cytoskeletal protein binding)|GO:0009898(internal side of plasma membrane)|GO:0035335(peptidyl-tyrosine dephosphorylation)
ARL4D	ADP-ribosylation factor-like 4D	0.485	0.000594	0.423156	0.0324181	GO:0003924(GTPase activity)|GO:0005515(protein binding)|GO:0005525(GTP binding)|GO:0005730(nucleolus)|GO:0005737(cytoplasm)|GO:0005886(plasma membrane)|GO:0006184(GTP catabolic process)|GO:0007264(small GTPase mediated signal transduction)|GO:0009306(protein secretion)
EPHA2	EPH receptor A2	0.446	2.32e-06	0.18505	0.0132243	GO:0001501(skeletal system development)|GO:0001525(angiogenesis)|GO:0001570(vasculogenesis)|GO:0001649(osteoblast differentiation)|GO:0004714(transmembrane receptor protein tyrosine kinase activity)|GO:0005003(ephrin receptor activity)|GO:0005515(protein binding)|GO:0005524(ATP binding)|GO:0005886(plasma membrane)|GO:0005887(integral to plasma membrane)|GO:0005925(focal adhesion)|GO:0007155(cell …
PLAU	plasminogen activator, urokinase	0.44	0.000376	0.222577	0.0489012	GO:0001666(response to hypoxia)|GO:0004252(serine-type endopeptidase activity)|GO:0005515(protein binding)|GO:0005576(extracellular region)|GO:0005615(extracellular space)|GO:0005886(plasma membrane)|GO:0006508(proteolysis)|GO:0006935(chemotaxis)|GO:0007165(signal transduction)|GO:0007596(blood coagulation)|GO:0009986(cell surface)|GO:0010469(regulation of receptor activity)|GO:0014909(smooth mus…
DST	dystonin	0.437	0.0026	0.372434	0.0159937	GO:0000226(microtubule cytoskeleton organization)|GO:0003779(actin binding)|GO:0005178(integrin binding)|GO:0005509(calcium ion binding)|GO:0005515(protein binding)|GO:0005604(basement membrane)|GO:0005634(nucleus)|GO:0005635(nuclear envelope)|GO:0005737(cytoplasm)|GO:0005789(endoplasmic reticulum membrane)|GO:0005829(cytosol)|GO:0005882(intermediate filament)|GO:0005938(cell cortex)|GO:0007010(c…
RBMX2	RNA binding motif protein, X-linked 2	0.415	0.0115	0.405411	0.0070767	GO:0000166(nucleotide binding)|GO:0005515(protein binding)
CFLAR	CASP8 and FADD-like apoptosis regulator	0.397	0.00141	0.264911	0.00845293	GO:0002020(protease binding)|GO:0004197(cysteine-type endopeptidase activity)|GO:0005515(protein binding)|GO:0005737(cytoplasm)|GO:0005829(cytosol)|GO:0006508(proteolysis)|GO:0006915(apoptotic process)|GO:0007519(skeletal muscle tissue development)|GO:0008047(enzyme activator activity)|GO:0014732(skeletal muscle atrophy)|GO:0014842(regulation of satellite cell proliferation)|GO:0014866(skeletal m…
THBS1	thrombospondin 1	0.367	7.1e-05	0.346594	0.0405198	GO:0000187(activation of MAPK activity)|GO:0001666(response to hypoxia)|GO:0001786(phosphatidylserine binding)|GO:0001937(negative regulation of endothelial cell proliferation)|GO:0001948(glycoprotein binding)|GO:0001953(negative regulation of cell-matrix adhesion)|GO:0001968(fibronectin binding)|GO:0002040(sprouting angiogenesis)|GO:0002544(chronic inflammatory response)|GO:0002576(platelet degr…
SMTN	smoothelin	0.342	0.0077	0.271994	0.00329919	GO:0003779(actin binding)|GO:0005634(nucleus)|GO:0005730(nucleolus)|GO:0005737(cytoplasm)|GO:0005856(cytoskeleton)|GO:0006939(smooth muscle contraction)|GO:0007517(muscle organ development)|GO:0008307(structural constituent of muscle)|GO:0015629(actin cytoskeleton)
SDCBP2	syndecan binding protein (syntenin) 2	0.319	5.94e-09	0.236179	0.00533523	GO:0005737(cytoplasm)|GO:0005886(plasma membrane)|GO:0007399(nervous system development)|GO:0008022(protein C-terminus binding)|GO:0035556(intracellular signal transduction)|GO:0042803(protein homodimerization activity)|GO:0046907(intracellular transport)|GO:0046982(protein heterodimerization activity)|GO:0070062(extracellular vesicular exosome)
ZFP36L2	ZFP36 ring finger protein-like 2	0.315	0.000233	0.325737	0.0101522	GO:0000288(nuclear-transcribed mRNA catabolic process, deadenylation-dependent decay)|GO:0003677(DNA binding)|GO:0003700(sequence-specific DNA binding transcription factor activity)|GO:0005634(nucleus)|GO:0005737(cytoplasm)|GO:0006355(regulation of transcription, DNA-dependent)|GO:0006402(mRNA catabolic process)|GO:0008283(cell proliferation)|GO:0017091(AU-rich element binding)|GO:0030097(hemopoi…
TLK2	tousled-like kinase 2	0.31	0.0294	0.394935	0.0112233	GO:0001672(regulation of chromatin assembly or disassembly)|GO:0004674(protein serine/threonine kinase activity)|GO:0005515(protein binding)|GO:0005524(ATP binding)|GO:0005634(nucleus)|GO:0005730(nucleolus)|GO:0005882(intermediate filament)|GO:0006468(protein phosphorylation)|GO:0006974(response to DNA damage stimulus)|GO:0007049(cell cycle)|GO:0007059(chromosome segregation)|GO:0010507(negative …
HAUS3	HAUS augmin-like complex, subunit 3	0.297	0.021	0.484287	0.0055863	GO:0003674(molecular_function)|GO:0005737(cytoplasm)|GO:0005813(centrosome)|GO:0005819(spindle)|GO:0005874(microtubule)|GO:0007067(mitosis)|GO:0051225(spindle assembly)|GO:0051297(centrosome organization)|GO:0070652(HAUS complex)
PARP1	poly (ADP-ribose) polymerase 1	0.285	0.00229	0.479485	0.0237658	GO:0000122(negative regulation of transcription from RNA polymerase II promoter)|GO:0000723(telomere maintenance)|GO:0003677(DNA binding)|GO:0003950(NAD+ ADP-ribosyltransferase activity)|GO:0005515(protein binding)|GO:0005634(nucleus)|GO:0005635(nuclear envelope)|GO:0005654(nucleoplasm)|GO:0005667(transcription factor complex)|GO:0005730(nucleolus)|GO:0006281(DNA repair)|GO:0006284(base-excision …
LAMC2	laminin, gamma 2	0.279	8.34e-07	0.401262	0.000257149	GO:0005576(extracellular region)|GO:0005607(laminin-2 complex)|GO:0005610(laminin-5 complex)|GO:0005615(extracellular space)|GO:0005938(cell cortex)|GO:0007155(cell adhesion)|GO:0008201(heparin binding)|GO:0008544(epidermis development)|GO:0016020(membrane)|GO:0022617(extracellular matrix disassembly)|GO:0030198(extracellular matrix organization)|GO:0031581(hemidesmosome assembly)|GO:0034329(cell…
TAGLN	transgelin	0.267	1.53e-09	0.131761	0.0456898	GO:0003779(actin binding)|GO:0005515(protein binding)|GO:0005737(cytoplasm)|GO:0007517(muscle organ development)|GO:0030855(epithelial cell differentiation)
TPR	translocated promoter region, nuclear basket protein	0.246	0.0005	0.483749	9.57e-05	GO:0000122(negative regulation of transcription from RNA polymerase II promoter)|GO:0000189(MAPK import into nucleus)|GO:0000278(mitotic cell cycle)|GO:0000776(kinetochore)|GO:0003682(chromatin binding)|GO:0003729(mRNA binding)|GO:0005215(transporter activity)|GO:0005487(nucleocytoplasmic transporter activity)|GO:0005515(protein binding)|GO:0005634(nucleus)|GO:0005635(nuclear envelope)|GO:0005643…
PKP2	plakophilin 2	0.239	6.65e-05	0.44958	0.0185681	GO:0002159(desmosome assembly)|GO:0003674(molecular_function)|GO:0005080(protein kinase C binding)|GO:0005515(protein binding)|GO:0005634(nucleus)|GO:0005730(nucleolus)|GO:0005882(intermediate filament)|GO:0005886(plasma membrane)|GO:0005911(cell-cell junction)|GO:0005912(adherens junction)|GO:0007507(heart development)|GO:0008285(negative regulation of cell proliferation)|GO:0010765(positive reg…
CYR61	cysteine-rich, angiogenic inducer, 61	0.218	1.09e-06	0.288611	0.0351892	GO:0001558(regulation of cell growth)|GO:0001649(osteoblast differentiation)|GO:0001934(positive regulation of protein phosphorylation)|GO:0002041(intussusceptive angiogenesis)|GO:0003181(atrioventricular valve morphogenesis)|GO:0003278(apoptotic process involved in heart morphogenesis)|GO:0003281(ventricular septum development)|GO:0005178(integrin binding)|GO:0005520(insulin-like growth factor b…
