# Supplementary material for: Angiogenic Transformation in Human Brain Micro Endothelial Cells: Whole Genome DNA Methylation and Transcriptomic Analysis
Source: Front Physiol. 2019 Dec 11;10:1502. doi: 10.3389/fphys.2019.01502 (PMC6917667; doi:10.3389/fphys.2019.01502)
Supplement: TABLE S4 — Enlists the CpG sites with significantly altered (p < 0.05) methylation as a result of capillary tube formation. [file Table_4.XLSX]

## Sheet: File_ctrl_vs_TF_p05__25184
Supplemental Table S4: Enlists the CpG sites with significantly altered (P<0.05) methylation as a result of capillary tube formation.
Illumina id	Control 1	Control 2	Control 3	Control 4	Control 5	Control 6	TF1	TF2	TF3	TF4	TF5	TF6	p-value	stepup(p-value)	MeanDiff(TF-ctrl)	Genome_Build	CHR	MAPINFO	SourceSeq	Strand	UCSC_RefGene_Name	UCSC_RefGene_Accession	UCSC_RefGene_Group	UCSC_CpG_Islands_Name	Relation_to_UCSC_CpG_Island	DMR	Enhancer	HMM_Island	Regulatory_Feature_Name	Regulatory_Feature_Group	DHS	RANGE_START	RANGE_END	RANGE_GB	SPOT_ID
cg09372808	0.553065	0.484261	0.540582	0.555767	0.53526	0.585399	0.768251	0.75545	0.709591	0.805535	0.776935	0.679769	8.98e-06	0.00721133	0.206866	37	1	167791030	CGCAAACATATCATGTTGTGGTGATACAGGGATAAATAAGAAAAGATTGC	R	ADCY10;ADCY10	NM_001167749;NM_018417	Body;Body	chr1:167789396-167789647	S_Shore		TRUE					167791030	167791153	NC_000001.10
cg01522425	0.198602	0.209536	0.210229	0.253792	0.230756	0.180822	0.42531	0.393827	0.363723	0.460772	0.480126	0.383127	1.42e-05	0.00853048	0.203858	37	3	16525848	CGCAATGTGCATGTCTTGAATAAGGAATGTCATCCTGTTATTATCATGAC	F	RFTN1	NM_015150	Body				TRUE				TRUE	16525848	16525971	NC_000003.11
cg18707028	0.540849	0.366552	0.579083	0.577692	0.517467	0.56867	0.667848	0.688032	0.732677	0.664303	0.667336	0.77602	0.00187892	0.0441542	0.174317	37	14	78112132	ATTATTGCAGTAATACATGTACATAGCAAAAAAGGCATACCAGAGATACG	F				chr14:78108170-78108662	S_Shelf							78112132	78112255	NC_000014.8
cg27101034	0.423894	0.442913	0.427654	0.509869	0.44909	0.417639	0.613034	0.575334	0.61129	0.529131	0.707884	0.652599	0.000401429	0.025163	0.169702	37	5	60137757	CGTGTAGGAGCTGGTAGACATTGTACATGAAGGGGAGAAAAGCCTGTGTT	R	ELOVL7;ELOVL7	NM_024930;NM_001104558	5'UTR;5'UTR	chr5:60139359-60140155	N_Shore	CDMR						60137757	60137880	NC_000005.9
cg16161359	0.302679	0.271107	0.239789	0.325446	0.253763	0.293448	0.453651	0.354097	0.479376	0.474347	0.472182	0.455945	5.9e-05	0.0130163	0.167228	37	4	115009280	TTATCACCTTCCCTTTATGCTGAAATATTCTGTTTACATCACTGCATACG	R							TRUE					115009280	115009403	NC_000004.11
cg02097616	0.304575	0.364645	0.296508	0.34321	0.311422	0.313072	0.441976	0.490128	0.600605	0.504341	0.49001	0.387505	0.00154465	0.0409298	0.163523	37	17	62675921	CGGGGCTGGAGCTGCTACCTCATCCTGAAAAGATGTGTTGCTTCATGCTA	R							TRUE				TRUE	62675921	62676044	NC_000017.10
cg23516342	0.443259	0.58197	0.44849	0.402092	0.429512	0.464504	0.583889	0.630834	0.618012	0.676214	0.682427	0.541961	0.000813781	0.0324389	0.160585	37	X	27764690	CGATCTTCAAAAACCCGCAGCTACTCACAGTGTAAGATGCCTGTCGGGGT	F	DCAF8L2	NM_001136533	TSS1500									27764690	27764813	NC_000023.10
cg01118640	0.361622	0.526017	0.441728	0.523362	0.525068	0.5149	0.597946	0.580054	0.652054	0.692493	0.63799	0.684156	0.00107073	0.0357382	0.158666	37	14	52816915	CGCCTCTGAAAGAATGCAAACGGCCAGCCAATTTTAGACTTCTGACTTCC	R							TRUE					52816915	52817038	NC_000014.8
cg03256684	0.38935	0.246683	0.288595	0.245388	0.291459	0.276606	0.396735	0.455139	0.438803	0.488086	0.400372	0.476621	0.00026316	0.0216547	0.152946	37	15	53045142	TTGGTATCAAAGAAAGTTTCATTGCATGGTTGCACGGAAAAAGCACCACG	R							TRUE					53045142	53045265	NC_000015.9
cg18016288	0.559356	0.56648	0.541537	0.535257	0.474039	0.573295	0.683467	0.755013	0.69017	0.713383	0.684476	0.639345	3.32e-05	0.0112608	0.152648	37	13	95834131	CGAGTTCTGAGTTGTTTCAGTATTGCCTTTAAGTAACTTCTAGCAAGCAC	R	ABCC4;ABCC4	NM_001105515;NM_005845	Body;Body				TRUE					95834131	95834254	NC_000013.10
cg10988187	0.220884	0.247894	0.300698	0.304391	0.2752	0.259986	0.371864	0.415997	0.379827	0.4253	0.52782	0.399156	0.000466595	0.0266278	0.151819	37	12	71031813	CGCCATCCTCTGTTTGGGGAAGACCAAAGTAGATAATGTGATGGGTTTAA	R	PTPRB	NM_001109754	TSS1500									71031813	71031936	NC_000012.11
cg01433955	0.355855	0.354485	0.365052	0.3833	0.337084	0.381233	0.481742	0.490589	0.490066	0.530064	0.568506	0.526599	1.36e-05	0.0083656	0.151759	37	20	57223269	CGCCCTGACCCACACTGGAAGGGAGTTGGGGAAGGATGTAAATCATTATA	R				chr20:57224695-57226322	N_Shore							57223269	57223392	NC_000020.10
cg15943603	0.349171	0.332985	0.364455	0.356597	0.363914	0.372901	0.505727	0.56433	0.540456	0.472566	0.478592	0.469146	0.000103872	0.0157766	0.148466	37	8	117050063	CAAAATTCAGGCACTTCTTCATCGGAGATCATCACAGGCCCTCAATCACG	F							TRUE					117050063	117050186	NC_000008.10
cg24834873	0.298656	0.254238	0.211375	0.281319	0.174649	0.225725	0.468865	0.417137	0.332541	0.365201	0.330942	0.408705	0.000550676	0.028073	0.146238	37	5	79865402	CGCCCAAGTCAGCCCCTCCGGAGACGCGCCCAAGTCAGCCCCTCCGACCC	F	ANKRD34B	NM_001004441	5'UTR	chr5:79864842-79866447	Island	DMR	TRUE	5:79900634-79902253				79865402	79865525	NC_000005.9
cg23216101	0.381296	0.311897	0.38899	0.29674	0.29898	0.369896	0.485782	0.552571	0.502842	0.426568	0.449267	0.505752	0.000186545	0.0190779	0.145831	37	1	91570212	CTTCCCCGGTGCTAGAGAGATTCGTTTATTCAAGGATTTATTTAGTATCG	R							TRUE					91570212	91570335	NC_000001.10
cg08930843	0.163468	0.100887	0.0950012	0.0843439	0.114767	0.123496	0.276246	0.253255	0.294667	0.173114	0.190096	0.324665	0.00126367	0.0380224	0.138347	37	10	31182298	TGCTCACTTCCTTTTGGTGATGTTGGGCAGCAGCACTGTCTCTTGCAACG	F	ZNF438;ZNF438;ZNF438;ZNF438;ZNF438;ZNF438;ZNF438;ZNF438	NM_001143769;NM_001143768;NM_182755;NM_001143767;NM_001143770;NM_001143766;NM_001143771;NR_026560	5'UTR;5'UTR;5'UTR;5'UTR;5'UTR;5'UTR;5'UTR;Body				TRUE					31182298	31182421	NC_000010.10
cg12129796	0.194755	0.159183	0.148325	0.142624	0.146339	0.126081	0.306144	0.315472	0.343706	0.203994	0.270361	0.30612	0.000377629	0.0245917	0.138082	37	8	79753073	CGAGAAGAATTTTGCCAGGCGAATGAGAAACACCCTTGATTTTTTTTGCA	F						DMR						79753073	79753196	NC_000008.10
cg18535611	0.41911	0.436798	0.327394	0.303922	0.35881	0.320484	0.449384	0.490527	0.543913	0.535017	0.509143	0.465129	0.000721109	0.030998	0.137766	37	13	28505434	CATCTGTAAGATGGAATGCACATGATAAAATTATATTCCTTCCAGGTGCG	R				chr13:28501859-28502090	S_Shelf							28505434	28505557	NC_000013.10
cg10767554	0.400466	0.301234	0.397837	0.326737	0.322146	0.404563	0.580976	0.439052	0.540106	0.456246	0.440744	0.520151	0.00141328	0.0397319	0.137382	37	15	61404686	CCTCCCCCAGGGGGAGTGGCATTTGAGCAAAGCCTAACAGGATGGGGACG	R	RORA	NM_134261	Body				TRUE					61404686	61404809	NC_000015.9
cg14112978	0.116299	0.085399	0.117488	0.0639965	0.0680424	0.092473	0.222182	0.263087	0.267949	0.157106	0.206924	0.247618	0.000125136	0.0168122	0.136861	37	10	74804603	ATTTTCAGTCACCAGCTCAAGTCACCACCCTGTATATAAACAGGATAACG	F	P4HA1;P4HA1;P4HA1;P4HA1	NM_001017962;NM_001142596;NM_000917;NM_001142595	Body;Body;Body;Body				TRUE					74804603	74804726	NC_000010.10
cg01850954	0.223729	0.215093	0.198718	0.248622	0.210589	0.214083	0.362841	0.30352	0.325786	0.386683	0.360367	0.389024	3.73e-05	0.0116203	0.136231	37	11	115238331	CGTGGAAGAAATGCAACAAAATGCTAACAGTGGTTGACTGGGCAGTGGGA	R	CADM1;CADM1	NM_001098517;NM_014333	Body;Body				TRUE					115238331	115238454	NC_000011.9
cg05396156	0.413026	0.407323	0.422613	0.387844	0.376446	0.37495	0.502346	0.449284	0.567872	0.569157	0.60832	0.502477	0.00152774	0.0407398	0.136209	37	1	219497045	GTTTTTATTATTGTTTTTGCCTTTGCCCTCTTCCCTTCTAAACTGCCTCG	F							TRUE					219497045	219497168	NC_000001.10
cg11876912	0.156454	0.209259	0.127774	0.123033	0.162462	0.181394	0.294797	0.287738	0.238136	0.333713	0.275459	0.338016	6.33e-05	0.0133559	0.13458	37	3	63602009	CGGCCCAATAACTCTTTGTGTTTATGGAGTGTTGTTTTCTTAGAATAATG	F	SYNPR;SYNPR	NM_144642;NM_001130003	3'UTR;3'UTR									63602009	63602132	NC_000003.11
ch.12.1023240F	0.170821	0.127949	0.106921	0.123972	0.126574	0.135721	0.284863	0.259445	0.321266	0.216189	0.215781	0.301674	0.000237414	0.0207427	0.134544	36	12	50635579	CAGCAACTAGCATTCTTCTGACACAAAATGTGAAGGACACAAAATGGGGG	F	LIMA1;LIMA1	NM_001113546;NM_016357	Body;Body									50635579	50635702	NC_000012.11
cg08321111	0.628745	0.595038	0.620784	0.57801	0.603381	0.611701	0.755947	0.747487	0.74184	0.722927	0.726706	0.748642	1.34e-07	0.00204168	0.134315	37	5	77701852	CGGCTGTTAAAGTGAGTGAAAGCTGCAGAAAGTTTCAGGATCCTTTTGGC	F	SCAMP1	NM_004866	Body				TRUE					77701852	77701975	NC_000005.9
cg06585690	0.512609	0.500445	0.504114	0.38653	0.390629	0.43946	0.538619	0.587758	0.581297	0.680004	0.601424	0.543099	0.00186923	0.0440695	0.133069	37	4	71262957	CGTGCATGCAGGTGGAAGCCATTATCCTAAGCAAACGAATTCAAGGAGAG	F	PROL1	NM_021225	TSS1500									71262957	71263080	NC_000004.11
cg17110364	0.581767	0.544132	0.485962	0.523042	0.514309	0.540516	0.629274	0.728345	0.676407	0.651362	0.621461	0.68108	9.3e-05	0.015222	0.133034	37	2	43903227	AGTGTTTGGTCCAGGTCTCTTTCAGTACAGCCCAGTAACTCTCATCTTCG	R	PLEKHH2;LOC728819	NM_172069;NM_001101330	Body;1stExon				TRUE				TRUE	43903227	43903350	NC_000002.11
cg22234119	0.223973	0.164136	0.179843	0.12332	0.166639	0.229574	0.338848	0.312599	0.287186	0.248339	0.336682	0.359487	0.000199412	0.0195932	0.132609	37	2	114635699	CGGTACTTTGACTTCAAAGGGTGGGGCTGCAAATTAGTCATCTCCTTAGA	F							TRUE					114635699	114635822	NC_000002.11
cg00069003	0.186742	0.17492	0.195246	0.224012	0.260192	0.214941	0.311235	0.379718	0.299491	0.33955	0.325564	0.395432	7.37e-05	0.0140822	0.132489	37	5	140164106	CGCTCTTGCAAAGCTGTTAATGAGGAATCCCAATACTTCTGGTGGTATCA	R				chr5:140165958-140166214	N_Shore							140164106	140164229	NC_000005.9
cg02140072	0.57161	0.559823	0.593284	0.556582	0.549461	0.616509	0.719394	0.700618	0.716353	0.682432	0.748398	0.667769	8.78e-06	0.00715861	0.131282	37	10	22536731	TCACACTGAATAAGCAAAACAATAACCACTTGGCTTCATGATGCTTTTCG	R				chr10:22540707-22542739	N_Shelf							22536731	22536854	NC_000010.10
ch.1.173213985R	0.157029	0.0968528	0.149777	0.103316	0.12752	0.137911	0.296303	0.232365	0.332744	0.195381	0.2503	0.246693	0.000511788	0.0274175	0.13023	36	1	174947362	CAGTCACTGAAATGTTAAATTATGAATGCTATAGTTATAACCACAGTTAT	F												174947362	174947485	NC_000001.10
cg10292949	0.471128	0.526641	0.493613	0.553216	0.595194	0.555538	0.649035	0.623642	0.609613	0.700643	0.703157	0.689331	0.000395881	0.0250899	0.130015	37	11	14997972	CGTGTCTTTCTGTGCCTCACTTATTTTGTGTGTCATAATATTCCCCAGGT	R				chr11:14995128-14995908	S_Shelf							14997972	14998095	NC_000011.9
cg19609438	0.188778	0.201557	0.287202	0.292691	0.289661	0.184871	0.335801	0.287911	0.396247	0.425176	0.411355	0.36489	0.0017295	0.0427992	0.129436	37	8	100770219	GAAACCAATTTACTTGTTCCCACTTCCCATGACTCAGTACTAGATATTCG	R	VPS13B;VPS13B	NM_017890;NM_152564	Body;Body				TRUE					100770219	100770342	NC_000008.10
cg09614810	0.70231	0.532244	0.647711	0.667933	0.640041	0.655624	0.779106	0.750544	0.807561	0.770927	0.767914	0.744777	0.00172634	0.0427692	0.129161	37	6	74227212	TTTCCAGATTCGTAAAACCAGAATTAGATGTCTTTCACCTAAATGTCTCG	R	EEF1A1	NM_001402	3'UTR	chr6:74229962-74231497	N_Shelf							74227212	74227335	NC_000006.11
cg26372498	0.396076	0.394984	0.378304	0.417712	0.369542	0.449924	0.480939	0.496113	0.52627	0.548304	0.634854	0.494562	0.00137716	0.0393218	0.129083	37	2	168614674	AAAAGAGACTCCTGGGATATTGTTATATGTTCTTATTACAGTCCTATTCG	F							TRUE					168614674	168614797	NC_000002.11
cg13727618	0.568808	0.554911	0.580455	0.570555	0.597313	0.58759	0.667612	0.711381	0.675636	0.704464	0.728356	0.744905	2.18e-05	0.00968056	0.128787	37	19	7145317	CGTGTTCCTTTATAAGTCATTCTAGATGGGGTTATTATGAGTTGTGCTAA	F	INSR;INSR	NM_000208;NM_001079817	Body;Body	chr19:7142907-7143109	S_Shelf							7145317	7145440	NC_000019.9
cg17513789	0.709052	0.736237	0.684467	0.727054	0.726649	0.679481	0.864458	0.814245	0.825083	0.873144	0.83238	0.825408	2.96e-06	0.00509438	0.12863	37	X	73073251	CGGAAGTGCTTACGAGTCAATTGGTGAGCAAGAGAGAAAAAGGAAAGAAA	F	XIST	NR_001564	TSS1500									73073251	73073374	NC_000023.10
cg14823935	0.339686	0.297701	0.315618	0.358302	0.286116	0.340746	0.475462	0.418969	0.445554	0.465369	0.366306	0.533845	0.00141039	0.0397	0.12789	37	1	211308714	TTGGAGTGACTAAATAAATTGGGCCATTACGAATATCACCCTTTATCTCG	R	KCNH1;KCNH1	NM_172362;NM_002238	TSS1500;TSS1500	chr1:211306667-211307675	S_Shore				1:211308695-211309076	Unclassified_Cell_type_specific		211308714	211308837	NC_000001.10
cg18326562	0.151953	0.0864909	0.14806	0.0996895	0.12865	0.125881	0.291722	0.239646	0.288722	0.233779	0.185815	0.264117	0.000128542	0.0169039	0.127179	37	17	67413885	CGGGAGAGAAAAACTATTGTTATCAGCCATAATGATCTCCGGAGGGAGGG	F	MAP2K6	NM_002758	Body				TRUE					67413885	67414008	NC_000017.10
cg18297745	0.128908	0.13781	0.152077	0.18205	0.171642	0.143549	0.283024	0.208902	0.220877	0.291608	0.335207	0.338796	0.00154253	0.0409169	0.127063	37	3	147016780	CGGTTAGCATAGACTCACAGGGAGATATTCACAACCAGAAAGTGGAATTT	R							TRUE					147016780	147016903	NC_000003.11
cg25271063	0.531959	0.541104	0.556904	0.655794	0.632968	0.664496	0.715112	0.691829	0.7748	0.698593	0.707106	0.756078	0.00215211	0.0465381	0.126715	37	1	159771375	CCACGGTGATTTATGATGTCTAGCTCCTTTTGCTATGTTGATTTGACACG	R	FCRL6	NM_001004310	TSS1500									159771375	159771498	NC_000001.10
cg00778084	0.384336	0.353292	0.432696	0.373997	0.359962	0.38391	0.473046	0.453351	0.547528	0.524909	0.500489	0.546224	0.000113704	0.0163542	0.126226	37	1	173681595	CTTATGTAGCATGTTATAGTAACTCATCAATACTCACACTAGTCCTCTCG	F				chr1:173683985-173684403	N_Shelf							173681595	173681718	NC_000001.10
cg11507895	0.609441	0.578918	0.617517	0.588901	0.562087	0.622928	0.680201	0.763128	0.777093	0.64647	0.684208	0.7846	0.00223969	0.0473337	0.125985	37	4	87030123	CGGGACTTGAAACCACATCTGACAAGTGATGGTAGGGGACTGGTAATATT	R	MAPK10;MAPK10;MAPK10;MAPK10	NM_138981;NM_138980;NM_138982;NM_002753	TSS1500;Body;Body;Body									87030123	87030246	NC_000004.11
cg10633981	0.610309	0.673586	0.599737	0.611619	0.602155	0.639651	0.763178	0.742623	0.739589	0.79592	0.740938	0.710147	1.82e-05	0.00912063	0.125889	37	11	16779768	TCTAGGCTTCCTGATCTATCAATTCAGTATCATGATTGTTAACCCAAACG	R	C11orf58;C11orf58	NM_014267;NM_001142705	3'UTR;3'UTR									16779768	16779891	NC_000011.9
cg26504263	0.513797	0.470741	0.57109	0.627681	0.523763	0.509278	0.667371	0.687868	0.612218	0.62665	0.689505	0.68767	0.00129715	0.0383924	0.125822	37	6	90192032	CGGCCATTTATTTTGGTTTGAAAATAGCAAGGTTGGCTCACTGGATCCCA	R	ANKRD6	NM_014942	5'UTR				TRUE					90192032	90192155	NC_000006.11
cg14724419	0.629868	0.680584	0.580079	0.701927	0.726388	0.612876	0.761479	0.738459	0.745929	0.832227	0.806577	0.799048	0.00156817	0.0411381	0.125333	37	11	111178990	CGGCCACCACCTCCATCTGCTACTGCGCATCGTGTGAGGCAGAGGACTTG	F	C11orf93	NM_001136105	Body									111178990	111179113	NC_000011.9
cg17073169	0.304619	0.362362	0.350148	0.345044	0.316772	0.355475	0.460799	0.381376	0.445187	0.4962	0.537513	0.463855	0.00110583	0.0361724	0.125085	37	3	110533292	TGAAGTCATCATCTTACAAGTTGTATGCTCTTCAGGAATTTGCTCAACCG	F							TRUE					110533292	110533415	NC_000003.11
cg08339172	0.193774	0.121307	0.166228	0.142314	0.10795	0.220076	0.312033	0.275516	0.322215	0.185066	0.275166	0.327407	0.00135595	0.0390704	0.124293	37	17	63692987	CGAGGCTTGAATTTACTATCCTACTTTGGAGAAAACAGATGATTCATTTG	F	CCDC46;CCDC46	NM_001037325;NM_145036	Body;Body				TRUE					63692987	63693110	NC_000017.10
cg24820936	0.294692	0.258735	0.246502	0.259571	0.276481	0.307461	0.456721	0.293778	0.394451	0.447693	0.395624	0.398184	0.00219096	0.0469021	0.123835	37	8	101270745	CGGTTGTACAGTGGTAATTATTCTGCAGCATTTATGGGCCTAAATTTCAG	F	RNF19A;RNF19A	NM_183419;NM_015435	3'UTR;3'UTR				TRUE		8:101270524-101271700	Promoter_Associated		101270745	101270868	NC_000008.10
cg16523850	0.165096	0.104966	0.124921	0.122395	0.0883148	0.131837	0.20138	0.266383	0.253852	0.265882	0.215138	0.277061	2.42e-05	0.00999494	0.123694	37	6	54156824	CGGAGTCGTAGGAGGTGTTTCTTGAGTCATAGCTGCTCTCCATGTGTCAG	R							TRUE					54156824	54156947	NC_000006.11
cg00028232	0.677117	0.603516	0.684959	0.583562	0.616798	0.659648	0.768023	0.70248	0.803767	0.748782	0.795959	0.746753	0.000319447	0.023214	0.123361	37	4	1540469	AAAATTACAGTTTTCCAGAGCTTATCTACCTTCTAAGCTCTATGTCTACG	R				chr4:1541591-1541868	N_Shore							1540469	1540592	NC_000004.11
cg22734451	0.689673	0.638255	0.611403	0.557983	0.617016	0.581728	0.811541	0.762014	0.747262	0.723783	0.70206	0.689462	0.000805204	0.032305	0.123344	37	15	78219748	CTATATTATCCAACATTCCAATAAGGTAAAATAATCACAATGATTTCTCG	R	LOC645752	NR_027024	TSS1500									78219748	78219871	NC_000015.9
cg12498887	0.439655	0.407887	0.440619	0.514206	0.459102	0.476853	0.588816	0.515541	0.542255	0.58892	0.600241	0.642281	0.000438579	0.0260339	0.123289	37	22	33196328	CGTCAGCAGCTGTTCCATCTAACTGCAAATGGCCATTTGCAGCTGGGATC	R	SYN3;TIMP3;SYN3;SYN3	NM_133633;NM_000362;NM_003490;NM_001135774	Body;TSS1500;Body;Body	chr22:33197380-33198267	N_Shore							33196328	33196451	NC_000022.10
cg25307771	0.729857	0.63091	0.65331	0.643485	0.662408	0.685918	0.836093	0.752661	0.767718	0.811692	0.789786	0.785174	8.35e-05	0.0146536	0.122872	37	13	91067121	CGGAAATGGACTTGCCATTGTGCACTGTCAGTATAAACTTAGGGAAACTT	R							TRUE					91067121	91067244	NC_000013.10
cg27143246	0.136884	0.110899	0.119815	0.113723	0.120985	0.0867504	0.206305	0.232925	0.242499	0.148529	0.300068	0.292248	0.0023825	0.0484518	0.122253	37	3	169489583	CGGAAGCAAAAAGAGGAAATTCAAAAGTAATTTTACACGTCCTTCCACCA	F	MYNN	NM_018657	TSS1500	chr3:169490834-169491206	N_Shore				3:169489513-169490050	Promoter_Associated		169489583	169489706	NC_000003.11
cg13758310	0.698247	0.687847	0.729561	0.71882	0.706037	0.720844	0.827038	0.844909	0.829529	0.848898	0.829835	0.812251	6.23e-08	0.00189158	0.121851	37	4	1834493	GTGGCGCGGAGTATGGCCAGGCTCACCTTGTCGTCTGCCTTTATGGAGCG	R	LETM1	NM_012318	Body					4:1804247-1804511				1834493	1834616	NC_000004.11
cg07446509	0.392631	0.417487	0.427164	0.488887	0.386704	0.41068	0.534383	0.540458	0.577882	0.518166	0.589695	0.493243	0.000178411	0.018836	0.121712	37	14	105104840	CGTCGCCAAATTAGCTTCTAGATTAGTGCAACGCAAAGCAAAGTTCCAGC	F				chr14:105106461-105106666	N_Shore			14:104175857-104175994				105104840	105104963	NC_000014.8
cg21177502	0.183146	0.0990633	0.174574	0.0918967	0.109863	0.123252	0.261755	0.27004	0.28067	0.148745	0.246695	0.302652	0.00150276	0.0405101	0.12146	37	8	50968578	CCATTTTTCTATCCTTTCTGTTTTGAAGGGCTTGGAAGCAGTTCCAAACG	R	SNTG1	NM_018967	5'UTR				TRUE					50968578	50968701	NC_000008.10
cg04177517	0.614815	0.53564	0.575357	0.531115	0.521543	0.62592	0.645619	0.673773	0.726038	0.656092	0.694962	0.736368	0.000522686	0.0276053	0.12141	37	19	33571484	CGGAAAAACTACCTATTGGGTACTATGCTTATTACCTGGGGAGGAAATAA	F	GPATCH1	NM_018025	TSS1500	chr19:33571758-33572194	N_Shore							33571484	33571607	NC_000019.9
cg13009302	0.160474	0.115771	0.137061	0.092682	0.108435	0.149956	0.266083	0.234954	0.320167	0.202871	0.169681	0.296678	0.00213152	0.0463138	0.121009	37	18	55863675	CGTGCAGTTAGGAACTTTAAAAAATTGTAAATGAGGTGCATAATCATTAC	F	NEDD4L;NEDD4L;NEDD4L;NEDD4L;NEDD4L;NEDD4L;NEDD4L;NEDD4L	NM_001144964;NM_015277;NM_001144968;NM_001144967;NM_001144971;NM_001144965;NM_001144970;NM_001144969	5'UTR;Body;Body;Body;5'UTR;5'UTR;5'UTR;Body	chr18:55862653-55862873	S_Shore		TRUE					55863675	55863798	NC_000018.9
cg09173378	0.0332667	0.129054	0.11472	0.167337	0.155316	0.165823	0.253089	0.237054	0.249401	0.269835	0.26346	0.216035	0.00128323	0.0382382	0.12056	37	1	196370245	CGCCATGGATTCTTGGTTCAGAGGTCAGCCAAAGATGTTTACACTCATTC	R	KCNT2	NM_198503	Body				TRUE					196370245	196370368	NC_000001.10
ch.6.1140072F	0.105919	0.081664	0.0885298	0.0509191	0.0662267	0.090817	0.243186	0.164021	0.260682	0.121336	0.180026	0.238134	0.00196598	0.0448564	0.120551	36	6	46312258	CAGCATATGTAGAAATAAAATATATGACAAAACACAAATATTGAGGGGAG	F												46312258	46312381	NC_000006.11
cg06737942	0.179079	0.185352	0.201877	0.145828	0.150287	0.188588	0.297618	0.269694	0.328378	0.241962	0.289757	0.345291	0.000140681	0.0173485	0.120282	37	7	158613567	CGGCTGGTAAATTTCTGAGTTTAAGGCCTTGTCTTACACACATTTTGTGT	F	ESYT2	NM_020728	Body				TRUE					158613567	158613690	NC_000007.13
cg13058734	0.299132	0.294792	0.305386	0.28404	0.323654	0.21029	0.445195	0.451316	0.362345	0.443172	0.345208	0.391242	0.000743457	0.0313329	0.120198	37	1	246370933	CGTACAACTTAACTAAAACAGAAAAGAAAAAAGAAAAGCTCTGAAGTCTA	F	SMYD3;SMYD3	NM_022743;NM_001167740	Body;Body				TRUE					246370933	246371056	NC_000001.10
cg27133230	0.577045	0.502839	0.48125	0.432801	0.489324	0.523367	0.612336	0.626134	0.631954	0.585963	0.625052	0.645354	0.000881292	0.0333558	0.120028	37	20	43941404	TTCGCCATGTTGCCCTAGCTAGTCTTGAACTTCTGGGATCAACTGATCCG	F	RBPJL	NM_014276	Body	chr20:43940306-43941111	S_Shore				20:43940062-43941812	Unclassified		43941404	43941527	NC_000020.10
cg16165651	0.105703	0.10161	0.126649	0.105221	0.0942015	0.112228	0.199767	0.217288	0.281247	0.203331	0.189099	0.274502	0.000483086	0.0269547	0.119937	37	2	33747506	CGAAGGGCCTAGCAAAACATGTTCACTTGGGAGAAGTCAATGGAGCTAAA	R	RASGRP3;RASGRP3;RASGRP3	NM_001139488;NM_015376;NM_170672	Body;Body;Body				TRUE					33747506	33747629	NC_000002.11
cg07416364	0.197912	0.180756	0.172146	0.218434	0.249507	0.178464	0.266189	0.282132	0.377668	0.295425	0.392694	0.301912	0.00131841	0.0385936	0.1198	37	2	200733828	AAATTGCTCCTTTGCTTTTAAAGAAATGGTAGTCCTCAGTGGAGCCAACG	R							TRUE					200733828	200733951	NC_000002.11
cg11204664	0.638013	0.598545	0.62837	0.625059	0.646797	0.661402	0.748762	0.78252	0.768982	0.711986	0.692657	0.81115	0.000511601	0.0274137	0.119645	37	17	44325454	TTTTACTGGGGTTCATATCATGAATGTTTCGGCTTTCTTCTTCAGAGACG	R				chr17:44321465-44321793	S_Shelf							44325454	44325577	NC_000017.10
cg01775802	0.436082	0.424933	0.452075	0.369701	0.35691	0.430038	0.592285	0.5144	0.525349	0.567503	0.516504	0.4705	0.000514076	0.0274363	0.119467	37	14	72945461	CGGGAAGTGTTCCGCCTCCACACGCCATCAACCACTGAACTGCATCGAAT	F	RGS6	NM_004296	Body				TRUE					72945461	72945584	NC_000014.8
cg07969669	0.225109	0.0998383	0.137837	0.0914618	0.107814	0.174473	0.271015	0.286986	0.214603	0.227699	0.239836	0.311435	0.00131776	0.0385853	0.119173	37	10	64137956	CGGGTCTAGACACTAACTTCCCACCAGGAAACACCAGAAACCAAAAGGGA	R	ZNF365;ZNF365;ZNF365	NM_199450;NM_014951;NM_199451	Body;Body;Body	chr10:64133789-64134420	S_Shelf							64137956	64138079	NC_000010.10
cg20378687	0.416877	0.452996	0.438499	0.438944	0.433722	0.424871	0.558372	0.506612	0.577403	0.577232	0.57582	0.524755	6.71e-05	0.0136396	0.119047	37	3	160281681	ATGTTAACCTTAAAAGAACCACAGAATTAACATCCCTGGACACTTAGTCG	R	KPNA4	NM_002268	Body	chr3:160282505-160283874	N_Shore							160281681	160281804	NC_000003.11
ch.8.2085179F	0.117706	0.109398	0.115922	0.0792522	0.0780751	0.102429	0.229157	0.218268	0.26409	0.196564	0.165735	0.242187	0.000102703	0.0157497	0.11887	36	8	103238160	CAATTCCATCACTGGCTGCAAAAAAGGCTAAGATGTGAGAGATGAAGTAC	F	RRM2B	NM_015713	Body									103238160	103238283	NC_000008.10
cg00682263	0.183853	0.160234	0.199507	0.119089	0.110755	0.194278	0.307542	0.278217	0.290328	0.243536	0.31105	0.248387	0.000170455	0.018472	0.118557	37	15	66188803	ATCAAGGGTTTCAGAACTCTCATACTTCCTGTAGCAGTATTCCAGCTTCG	R	MEGF11	NM_032445	3'UTR									66188803	66188926	NC_000015.9
cg18604182	0.415177	0.381318	0.368856	0.377532	0.323807	0.398972	0.546527	0.505574	0.456017	0.524799	0.467774	0.473547	0.000124023	0.016794	0.118096	37	7	30999561	CGCAAAACTGGCCTTGTTTGATGAGAAGAATGAACAGGAGTATTGTGGTG	R												30999561	30999684	NC_000007.13
cg01480384	0.512102	0.541907	0.521981	0.51909	0.5721	0.573978	0.642509	0.609338	0.704947	0.618856	0.711216	0.662798	0.000371803	0.0244098	0.118084	37	12	54020711	CGTAGGGCATACTACATGCAAAGCATTGTTCTGCAGTCGAATGCTCTATC	F	ATF7;ATF7	NM_001130060;NM_006856	TSS1500;TSS1500	chr12:54019812-54020283	S_Shore				12:54019502-54020945	Promoter_Associated		54020711	54020834	NC_000012.11
cg00401101	0.418866	0.393393	0.403824	0.449776	0.339846	0.405556	0.54717	0.506234	0.496989	0.544909	0.551454	0.47205	0.000151779	0.0177737	0.117924	37	5	16509323	CGCCTAGCCACTCGGCAAAAAGATCCCTTACTCAAAAAGGTTTAAAACAA	F	FAM134B;FAM134B	NM_019000;NM_001034850	TSS1500;Body				TRUE				TRUE	16509323	16509446	NC_000005.9
cg16140873	0.52979	0.519326	0.548722	0.532743	0.479874	0.548902	0.560579	0.609706	0.709993	0.643664	0.698217	0.640981	0.00219324	0.0469116	0.117297	37	14	84949272	CGGCTAGTCTATGTCTCTGCTCTGGTCCAAGCAAATGCAAACAGGCTTAA	F							TRUE					84949272	84949395	NC_000014.8
cg27247689	0.538063	0.48175	0.555952	0.508673	0.485612	0.491039	0.643022	0.634133	0.610184	0.616968	0.617409	0.642852	5.55e-05	0.0127202	0.117246	37	8	73445394	CGTGAATCCCATTAAAGGGAGAAACATAAACATATATGTAAATGTGTTGT	R				chr8:73448659-73449725	N_Shelf							73445394	73445517	NC_000008.10
cg21342586	0.62744	0.63328	0.586304	0.618066	0.647716	0.624878	0.670945	0.739907	0.765082	0.683738	0.785178	0.791412	0.00162611	0.041712	0.11643	37	17	39204882	CCAGCTTTACTCCTCCTGTTAGTCACCAGACAGGGTTTTGAATCACTTCG	R	KRTAP2-1	NM_001123387	TSS1500				TRUE				TRUE	39204882	39205005	NC_000017.10
cg11115582	0.601306	0.58115	0.638392	0.595242	0.570449	0.607701	0.718994	0.756533	0.728792	0.683729	0.697584	0.7069	9.99e-06	0.00760199	0.116382	37	13	82245014	CGACACAGGGTTGTGTGTCTGTGTTTGTGTGCACTCTTATGTGATGTCTA	R							TRUE					82245014	82245137	NC_000013.10
ch.1.385573R	0.186523	0.139965	0.171485	0.116273	0.131348	0.133524	0.23715	0.271644	0.274259	0.212058	0.27898	0.303148	6.05e-05	0.0131068	0.116353	36	1	10464086	CAGGAAATGACCCAAGGATCTAGGAATAACTGATGACTCAGGAAAGTTAA	F	PGD	NM_002631	Body									10464086	10464209	NC_000001.10
cg25555847	0.669111	0.612193	0.645129	0.634372	0.659316	0.655491	0.775443	0.713581	0.769407	0.743346	0.78223	0.78898	1.89e-05	0.00921434	0.116229	37	4	155474495	CGGCAAAGACTGCCAGAGAACTACTGGAAGTTAGGGGAGAGGCATAGAAC	R				chr4:155471133-155471682	S_Shelf							155474495	155474618	NC_000004.11
cg26362852	0.175304	0.19942	0.130766	0.165749	0.195322	0.153681	0.273678	0.273112	0.359378	0.253879	0.218751	0.337605	0.00169231	0.0424103	0.116027	37	5	158634905	CGGCCGCTCAGCCTGGGTCACGACTGCAGCACCGACAGCTCATTCTTTTG	F	RNF145	NM_144726	TSS200	chr5:158636218-158636949	N_Shore							158634905	158635028	NC_000005.9
cg25407876	0.200291	0.198475	0.172464	0.21373	0.178231	0.155189	0.371858	0.238291	0.308722	0.272934	0.318567	0.302702	0.000678703	0.0301796	0.115782	37	10	75005362	CGGGTTCCACTAACTTTATCTCCTGAGGAATGCCTCAGGAATGCTACAAG	F	DNAJC9	NM_015190	Body	chr10:75006629-75007184	N_Shore	RDMR			10:75005356-75005461	Promoter_Associated_Cell_type_specific		75005362	75005485	NC_000010.10
cg19818016	0.659152	0.549416	0.655233	0.622648	0.579117	0.626247	0.772048	0.727329	0.784554	0.683	0.737687	0.681871	0.000920498	0.0338564	0.115779	37	1	27875683	CGCCCCAACTAAGCCCTTTACAGGCCAGGACTGCGCTAACAGCAAGGACT	R	AHDC1	NM_001029882	Body	chr1:27874417-27874638	S_Shore			1:27746611-27751172				27875683	27875806	NC_000001.10
cg13564816	0.11983	0.135571	0.151714	0.12465	0.115805	0.128514	0.277517	0.249657	0.222806	0.212738	0.23774	0.26863	1.5e-05	0.00864379	0.115501	37	9	118207596	CAATTCAAACCAGACTATTTTCTACTGCAGCCACAGAAAAACAATCCTCG	R							TRUE					118207596	118207719	NC_000009.11
cg02307823	0.169965	0.124172	0.109761	0.0856329	0.105206	0.07996	0.255993	0.203205	0.269436	0.181608	0.20776	0.249627	0.000150846	0.0177504	0.115489	37	10	89675901	AAATTTTCCCATTTCCCTTTGGAAAGTGCTGTTTTCTTGCTTTTTTTCCG	R	PTEN	NM_000314	Body				TRUE					89675901	89676024	NC_000010.10
cg15192146	0.192546	0.121061	0.169775	0.127109	0.12456	0.141714	0.265382	0.281259	0.304267	0.182592	0.237061	0.297576	0.000656282	0.0298158	0.115229	37	5	29524889	TGCTTAAGACACTCTTTCACTAAAATGAGGTATTTCTTTTTACTACCTCG	F							TRUE					29524889	29525012	NC_000005.9
cg24807294	0.604158	0.546536	0.576938	0.594643	0.562571	0.627731	0.659408	0.700657	0.731381	0.632151	0.765659	0.714658	0.000993617	0.0348887	0.115223	37	11	85397563	TGAAGCAGGCAATGATATATTTATCCTCCCTCTCCCCTCTTCAGTTATCG	R	CCDC89	NM_152723	TSS1500								TRUE	85397563	85397686	NC_000011.9
cg01411725	0.537048	0.435894	0.545129	0.526788	0.494292	0.469817	0.577813	0.64239	0.577521	0.585053	0.698626	0.618009	0.00138968	0.0394653	0.115074	37	17	18646832	AAGACTCGGTTCAAACATTGACTCTGGTACTTAGGAGCTATATGGTCTCG	F	FBXW10	NM_031456	TSS1500									18646832	18646955	NC_000017.10
cg20462795	0.447153	0.473119	0.446948	0.411762	0.418924	0.508465	0.485371	0.5908	0.530029	0.595183	0.57616	0.619107	0.00120787	0.037371	0.115047	37	6	10981184	CGTTCATAAATGTGTCTGGGGGCTTCCTTGTTTGGAAAATATGGATATCG	R	ELOVL2	NM_017770	3'UTR									10981184	10981307	NC_000006.11
rs5987737	0.776817	0.687857	0.743609	0.7388	0.720509	0.710246	0.834214	0.844158	0.869456	0.83975	0.845631	0.83335	7.78e-05	0.0143059	0.114787																				rs5987737
cg18404205	0.609999	0.596674	0.610446	0.591186	0.610797	0.623569	0.71734	0.714643	0.733394	0.696125	0.724069	0.744476	2.48e-07	0.00275895	0.114563	37	7	20822829	GTTTTTTCACCACTCCCAAACATAACCTCCCAATCTTTTTTGTTAGTCCG	F	SP8;SP8	NM_182700;NM_198956	3'UTR;3'UTR	chr7:20823307-20825662	N_Shore							20822829	20822952	NC_000007.13
cg22955899	0.31876	0.29028	0.23616	0.22513	0.223163	0.208698	0.369959	0.384603	0.397102	0.275514	0.335025	0.42532	0.00239555	0.0485546	0.114222	37	14	55617843	CGGCCAGACATTTAATGTCCTCCAGCTGTTCTTCATCAGCATTTTCTGGG	R	DLGAP5;DLGAP5	NM_014750;NM_001146015	Body;Body				TRUE					55617843	55617966	NC_000014.8
cg15160274	0.552394	0.612579	0.627847	0.608167	0.602938	0.616824	0.695334	0.690361	0.736474	0.695866	0.757155	0.73077	2.55e-05	0.0101964	0.114202	37	5	156097036	CGGGCTGGTCGTGATGGGGACAATCACTGCACATCGCTAATAGCTCCAGC	R	SGCD;SGCD;SGCD	NM_001128209;NM_172244;NM_000337	Body;Body;Body				TRUE					156097036	156097159	NC_000005.9
cg22449980	0.14756	0.121042	0.187789	0.126525	0.141431	0.119817	0.284347	0.224872	0.300894	0.195375	0.247816	0.275867	0.000278404	0.0221254	0.114168	37	4	157701149	CGGGTTATAAGTAATAATCAATGTGGAAAACTAGAATTCCATGGGATGAC	F	PDGFC	NM_016205	Body				TRUE					157701149	157701272	NC_000004.11
cg25406374	0.254584	0.169297	0.181667	0.125338	0.164525	0.186197	0.306387	0.281252	0.301684	0.287598	0.253138	0.336518	0.000425437	0.0257071	0.114162	37	10	3442760	GATCACAAGTGATTTTTTGTTCTAAACAAAGTGATTTCCTGTTAGCACCG	R							TRUE					3442760	3442883	NC_000010.10
cg00022900	0.520709	0.459188	0.493821	0.531867	0.475225	0.499511	0.593702	0.592146	0.649273	0.593728	0.597173	0.639263	2.29e-05	0.00976549	0.11416	37	8	94143534	CGTGGATTTCCTTGGTGAAGTAAAGAATGATTTACACACTAAAGGGCTCA	R							TRUE					94143534	94143657	NC_000008.10
cg11809668	0.155592	0.0862939	0.1314	0.0869511	0.108649	0.105225	0.210855	0.259285	0.241793	0.142785	0.272633	0.230993	0.000794007	0.0321641	0.114039	37	4	154435522	GCCCATGTTTCTCTTGGATCTCAATTGCTTTTCACTTGGCATTTGTCTCG	R	KIAA0922;KIAA0922	NM_015196;NM_001131007	Body;Body				TRUE					154435522	154435645	NC_000004.11
cg08765597	0.240789	0.288093	0.299942	0.231523	0.202284	0.305407	0.382695	0.355845	0.390815	0.399621	0.367595	0.355288	0.000561847	0.0282874	0.11397	37	11	114490767	CGAGGCAGTAGTGAGTATCCATTGGGTAACAATGGTTACCCACGAGGCAA	R								11:113995871-113995978				114490767	114490890	NC_000011.9
cg25439479	0.493215	0.436583	0.491021	0.477058	0.504614	0.504948	0.60061	0.569968	0.624736	0.570195	0.628687	0.596505	1.59e-05	0.0087646	0.113877	37	8	92971562	CGTTGAAGGGTTATTTAGGGCAGCTGGCTGATGTCAAAACTGCCAGAATG	F	RUNX1T1;RUNX1T1;RUNX1T1;RUNX1T1	NM_175634;NM_004349;NM_175635;NM_175636	3'UTR;3'UTR;3'UTR;3'UTR									92971562	92971685	NC_000008.10
cg03606725	0.170556	0.129252	0.198359	0.128929	0.253392	0.234001	0.29064	0.278936	0.34981	0.265865	0.320438	0.290454	0.0017506	0.0430273	0.113609	37	16	79758582	CGAGCTAAAAGGAGATTAATGAAATTATTCATGGCACATTCACACCATTG	F							TRUE					79758582	79758705	NC_000016.9
cg03977394	0.118924	0.101669	0.120501	0.0853597	0.0917568	0.131211	0.212093	0.200857	0.262035	0.193536	0.197141	0.265082	8.94e-05	0.0149894	0.113554	37	5	94891623	CGGGGGAGTGAATCAAGTTATACCAACGATTCCATTTGAATCAGCACTAA	R	ARSK;TTC37	NM_198150;NM_014639	Body;TSS1500	chr5:94890407-94891169	S_Shore				5:94890083-94891660	Promoter_Associated		94891623	94891746	NC_000005.9
cg18086819	0.203587	0.162268	0.163411	0.163094	0.177498	0.228889	0.23534	0.250726	0.334733	0.265458	0.340591	0.352591	0.00165725	0.0421079	0.113449	37	6	75977411	CGGAGATAAACATTTATTACAGGGACTGGAAGGCTCTGTTCCGGTATAAT	F	TMEM30A;TMEM30A	NM_001143958;NM_018247	Body;Body				TRUE					75977411	75977534	NC_000006.11
cg11569531	0.670657	0.639868	0.684389	0.612783	0.623971	0.628486	0.773886	0.729216	0.755819	0.718697	0.769001	0.793739	3.97e-05	0.0117546	0.113367	37	3	98108644	AAAGTTTTAACTAATTGCCCCAGTCCACACAGATTTCCATTTTCCGAACG	F	OR5K3	NM_001005516	TSS1500									98108644	98108767	NC_000003.11
cg13359054	0.124874	0.0844581	0.0847884	0.0541609	0.0816756	0.0988999	0.211392	0.195484	0.22121	0.116781	0.180286	0.283677	0.00249332	0.0492931	0.113329	37	17	27618348	AGCTTTTCAATTAGAAACAAATTACTCAACACATTTGGCCTTCTCTTGCG	R	NUFIP2	NM_020772	Body	chr17:27619491-27620393	N_Shore	RDMR			17:27618121-27618825	Promoter_Associated_Cell_type_specific		27618348	27618471	NC_000017.10
cg11957130	0.422234	0.400668	0.405503	0.459165	0.424343	0.451366	0.538969	0.527055	0.505223	0.551179	0.522033	0.598789	6.52e-05	0.0135128	0.113328	37	7	105306555	CGGGTGCACACTAGAACTTTACTTCATGCATCTGCTCTCCTGGTCAGTAT	R	ATXN7L1;ATXN7L1	NM_020725;NM_138495	Body;5'UTR				TRUE					105306555	105306678	NC_000007.13
cg02613223	0.496808	0.509853	0.462313	0.49475	0.41671	0.476535	0.61955	0.589565	0.570327	0.59567	0.607009	0.554578	8.36e-05	0.0146718	0.113288	37	1	158724794	CGGATTTATCCTAACTGGAAACCTAATAATGTTCATTGTCATCCAGGTGG	F	OR6K6	NM_001005184	1stExon									158724794	158724917	NC_000001.10
cg26094004	0.55767	0.51345	0.612539	0.555764	0.627413	0.648346	0.711887	0.694569	0.683401	0.69123	0.660349	0.752932	0.00162709	0.0417192	0.113198	37	17	42075116	CGGCTTCGACCCTATATCCCCCGCCCGCGTTCCTTTAAGGCCATTTAGGA	F	PYY	NM_004160	5'UTR	chr17:42072138-42072444	S_Shelf						TRUE	42075116	42075239	NC_000017.10
cg05652381	0.295261	0.194003	0.253137	0.253037	0.24464	0.212288	0.430523	0.279886	0.336074	0.346438	0.394771	0.343696	0.00177991	0.043288	0.11317	37	3	138043797	CTAGAGCAAATAGATTGAATTGTTTCCCTGCCTGAGCCCTCAGTAATACG	F	TXNDC6	NM_178130	5'UTR									138043797	138043920	NC_000003.11
cg03860992	0.208071	0.239613	0.224699	0.235256	0.252726	0.216208	0.370487	0.390789	0.359478	0.249217	0.332689	0.352917	0.00175273	0.0430404	0.113167	37	5	161273013	CTATAGCCCCCAAATTATTTAATATTTATTTCTTTAAATGTTTGAAAACG	R	GABRA1	NM_000806	TSS1500									161273013	161273136	NC_000005.9
cg18932526	0.724551	0.634264	0.698872	0.630173	0.675968	0.641907	0.792463	0.763538	0.809356	0.770207	0.767141	0.781831	0.000327695	0.0234115	0.113134	37	10	49608557	CGCAGCCAAGGATCAGGTCAAGGCATTCTCATGCTCTCTCCAGTGGCTCA	F	MAPK8;MAPK8;MAPK8;MAPK8	NM_139049;NM_002750;NM_139046;NM_139047	TSS1500;TSS1500;TSS1500;TSS1500				TRUE					49608557	49608680	NC_000010.10
cg21613620	0.178403	0.152033	0.154598	0.149506	0.130122	0.13122	0.281732	0.28788	0.245176	0.227114	0.298453	0.230083	6.39e-05	0.0134052	0.112426	37	13	97927242	GACTATTCTTTGTAGTTTTCATTTCTGTATTCCCAGTGCCTTAGTCTACG	F	MBNL2;MBNL2	NM_144778;NM_207304	5'UTR;5'UTR				TRUE					97927242	97927365	NC_000013.10
ch.11.997072R	0.117519	0.0881941	0.118212	0.0819198	0.0892783	0.0959171	0.207551	0.2195	0.248549	0.135703	0.208085	0.243894	0.00055924	0.0282368	0.11204	36	11	47659584	CAGTCAAGAAGAAGGATCTATGCAGGGCTGAGAAAATTATTAACCTTTAC	F	MTCH2	NM_014342	Body	chr11:47663577-47664331	N_Shelf							47659584	47659707	NC_000011.9
cg23840219	0.126551	0.0866196	0.126482	0.0773131	0.0647591	0.0917771	0.228719	0.243475	0.235123	0.119477	0.200153	0.218571	0.000829096	0.032675	0.112003	37	6	109381072	CGTCAAATTGCAGAAAAGTCTCGGGAATATTATCATAAGTAACTTTTTAA	R	SESN1	NM_014454	Body				TRUE		6:109380902-109381323	Unclassified_Cell_type_specific		109381072	109381195	NC_000006.11
cg25588740	0.782665	0.701624	0.752887	0.74189	0.765135	0.743228	0.809997	0.825541	0.84584	0.911246	0.8747	0.890166	0.000287822	0.0224039	0.111677	37	3	178781898	CGGGTATTGTAAACAATGGTGGTTACACTAGAGCCGGACTGTATCATGTG	R	ZMAT3;ZMAT3	NM_022470;NM_152240	Body;Body				TRUE					178781898	178782021	NC_000003.11
cg16206520	0.0987172	0.0827183	0.103599	0.0877047	0.0718926	0.0860605	0.199321	0.220922	0.253415	0.133704	0.187361	0.205877	0.000648759	0.0297187	0.111651	37	2	28002351	CGGTGGATTGAAAATGACTTTGATTTATAAAGAGAAGACTGAGGGCGGGG	F	MRPL33;MRPL33	NM_145330;NM_004891	Body;3'UTR									28002351	28002474	NC_000002.11
cg14931118	0.101034	0.0770725	0.103968	0.0761497	0.0857932	0.110281	0.241784	0.184026	0.235597	0.121665	0.207946	0.232486	0.0012532	0.0378883	0.111534	37	2	213228956	CGGGAAGTGATTCAGAGCATGTATTGCCAAAATTTTTACACTGTGCATGC	F	ERBB4;ERBB4	NM_005235;NM_001042599	Body;Body				TRUE					213228956	213229079	NC_000002.11
cg21581567	0.151838	0.240795	0.181065	0.241154	0.196716	0.215309	0.320753	0.355431	0.285075	0.291064	0.304817	0.337169	0.000142917	0.017454	0.111239	37	7	28502140	CGGGGCAGCCACTTGAGAAAACAGTTTTGTAGTTCTTCAAAATGTTAAAC	R	CREB5;CREB5;CREB5	NM_004904;NM_182899;NM_182898	5'UTR;5'UTR;Body									28502140	28502263	NC_000007.13
cg26980996	0.818761	0.724759	0.730931	0.729008	0.734161	0.740637	0.870288	0.867728	0.851717	0.853814	0.87847	0.823544	0.000183884	0.0189655	0.111218	37	7	98026481	CTTTCAGTGTCACCTCAAGGAAGTATGCTCAGACTCTCAGATTGCAGACG	F	BAIAP2L1	NM_018842	Body	chr7:98030097-98030422	N_Shelf							98026481	98026604	NC_000007.13
cg10619644	0.54994	0.569205	0.5938	0.622285	0.61798	0.605044	0.668568	0.661117	0.719792	0.714039	0.752424	0.708205	0.000128008	0.0169039	0.110982	37	7	69149951	CGTGCCTGGTGTGTACAGGGACTCATATTGTTTCTAAAATTCAGCTTTCA	F	AUTS2;AUTS2;AUTS2	NM_015570;NM_001127232;NM_001127231	Body;Body;Body				TRUE					69149951	69150074	NC_000007.13
cg01946824	0.814451	0.754625	0.804655	0.711773	0.835996	0.784243	0.903437	0.881343	0.876913	0.923691	0.910825	0.875156	0.000927539	0.0339533	0.110937	37	3	118864870	CTGCGTGCGTCAGGGAGAGTGGCCGTCCCGCTGTTGTAAGTGGAGGGACG	F	C3orf30;IGSF11;IGSF11	NM_152539;NM_152538;NM_152538	TSS200;1stExon;5'UTR				TRUE	3:120347515-120347665	3:118864282-118864967	Unclassified		118864870	118864993	NC_000003.11
cg24918767	0.120711	0.0803787	0.0850295	0.0977259	0.0860159	0.0887007	0.191936	0.19522	0.250945	0.127142	0.196853	0.261719	0.00179418	0.0434018	0.110876	37	4	88297189	GATACAGTGTTAGCTCCTTTACATGCATTATTTCATTTGTTTCCACAACG	F	HSD17B11	NM_016245	Body						4:88296901-88297255	Gene_Associated_Cell_type_specific		88297189	88297312	NC_000004.11
cg00563031	0.309531	0.268806	0.288143	0.324003	0.29595	0.270787	0.388702	0.443772	0.393532	0.406207	0.35438	0.435701	8.54e-05	0.0148278	0.110846	37	5	119782696	CGCACAATGGCAAAAGTATTTGCTTTTACTTAAGTGGGAAACATTTACAG	F							TRUE					119782696	119782819	NC_000005.9
cg16367168	0.209714	0.247095	0.230991	0.221531	0.19965	0.258861	0.308611	0.3737	0.338618	0.346792	0.302118	0.36289	2.98e-05	0.010937	0.110814	37	16	231905	GGATATGACAGCCATGTCCTGTTCTTGTTTACACATGACACAGTTTGCCG	F				chr16:230301-231761	S_Shore				16:230199-232081	Unclassified		231905	232028	NC_000016.9
cg09632271	0.642315	0.610543	0.624989	0.616593	0.637523	0.675315	0.730926	0.711787	0.768622	0.682977	0.769	0.807785	0.000878136	0.0333092	0.110637	37	4	68441222	AAGAATGTTATTTATAACCACAACCCTTTACAGACTACTGTTTCTCCTCG	F	STAP1	NM_012108	Body				TRUE		4:68441027-68441352	Unclassified_Cell_type_specific		68441222	68441345	NC_000004.11
cg04468334	0.831212	0.813874	0.760778	0.726129	0.744099	0.785762	0.88422	0.899219	0.900906	0.894215	0.88765	0.857628	0.000613724	0.0291537	0.11033	37	7	149414901	CGGCAGCCTTGTTGTCCACTTACTGCCGGGCTCTCTGCCTGTTCTCCCTG	R	KRBA1	NM_032534	5'UTR	chr7:149416662-149416974	N_Shore							149414901	149415024	NC_000007.13
cg07048608	0.539228	0.6055	0.557934	0.530323	0.528491	0.573253	0.646896	0.680388	0.648185	0.654194	0.671965	0.69471	4.34e-05	0.0119333	0.110268	37	1	158581040	CGAGGAGCTGCTTATTAGTTGCCAAAGTAGGAATTGGTGAAGCCAACGTA	F	SPTA1	NM_003126	3'UTR									158581040	158581163	NC_000001.10
cg13051700	0.661293	0.677612	0.662384	0.698428	0.685573	0.674851	0.764287	0.74026	0.758377	0.79991	0.807119	0.850789	0.000653245	0.0297867	0.1101	37	7	79050007	AGGCTAAAATAAAGTCTTCAACGGAGCTGACACTTTATTTTGCATCTACG	R	MAGI2	NM_012301	Body				TRUE					79050007	79050130	NC_000007.13
cg24057218	0.566878	0.610565	0.690373	0.614087	0.631128	0.637264	0.70293	0.729545	0.70701	0.763796	0.70927	0.795687	0.000658151	0.0298619	0.109657	37	14	68660680	TTAGCTTGTTTGTTTCTTTTAATGTCCCAGGCCATTTCTCCCAGAATTCG	F	RAD51L1;RAD51L1;RAD51L1	NM_133509;NM_002877;NM_133510	Body;Body;Body				TRUE					68660680	68660803	NC_000014.8
cg19862344	0.380257	0.42664	0.43473	0.403826	0.380254	0.363015	0.536877	0.501373	0.521399	0.48321	0.509335	0.493286	3.1e-05	0.011029	0.10946	37	6	49605181	CGGCAATCAGTCAAGCAAAGCTGGAATGTAAAAGAGATGAAGAGAAAAGG	F	RHAG	NM_000324	TSS1500									49605181	49605304	NC_000006.11
cg08822779	0.620214	0.5465	0.584124	0.567379	0.553907	0.587897	0.729041	0.642798	0.710242	0.665247	0.656105	0.712584	0.000176114	0.0187701	0.109332	37	11	71926700	TTCCACTTGGACAAGGAACTTACAGTACAGTAGCCCAAATCACAGAGACG	R	FOLR2;FOLR2;FOLR2;FOLR2	NM_001113535;NM_001113536;NM_000803;NM_001113534	TSS1500;TSS1500;TSS1500;TSS1500									71926700	71926823	NC_000011.9
cg12942552	0.649275	0.628324	0.61289	0.655189	0.680419	0.658886	0.778007	0.722733	0.75453	0.749395	0.766427	0.769815	7.36e-06	0.00690631	0.109321	37	5	57749839	AAAGACAGGAGACCATTATTTCTGCGTTTTCATACTCTTTATTGCCAACG	R	PLK2	NM_006622	3'UTR									57749839	57749962	NC_000005.9
cg27182510	0.11699	0.0905318	0.113547	0.118017	0.145349	0.121377	0.217039	0.236473	0.275454	0.165079	0.214113	0.251391	0.000351611	0.0238982	0.108956	37	6	128830356	CTAGCCCTCCCATATCTCTGGGGGATACATTCCAAGGTGCCCGGTAGACG	F	PTPRK;PTPRK	NM_002844;NM_001135648	Body;Body				TRUE				TRUE	128830356	128830479	NC_000006.11
cg21565415	0.475561	0.464494	0.384981	0.384474	0.348603	0.408983	0.493638	0.54124	0.50312	0.56786	0.533199	0.481591	0.00166741	0.0421917	0.108925	37	11	618993	GTCCCCACCGGGAGTGGCTGGTTGGTGGGAGGTGCTGTTTTCTGCACCCG	R	MUPCDH;MUPCDH	NM_021924;NM_031264	Body;Body	chr11:617226-617797	S_Shore							618993	619116	NC_000011.9
cg19403586	0.117325	0.0788998	0.138475	0.0931653	0.106979	0.167627	0.239241	0.225276	0.268821	0.180802	0.197532	0.243846	0.000158008	0.0180194	0.108841	37	8	80938785	TGTTGTATTTCCAGTGCCTAGCACAGTCCTTGACCCATAGTGGGCACTCG	F	MRPS28	NM_014018	Body	chr8:80942117-80942593	N_Shelf							80938785	80938908	NC_000008.10
cg08316234	0.570769	0.526109	0.520734	0.543348	0.506687	0.642985	0.627167	0.646443	0.631643	0.68762	0.703382	0.66731	0.00168424	0.0423476	0.108822	37	17	51899386	GTGTCCTTTAGAAGTTGTTAAGCAAGGCTGGAAGGCAGCTAAGACCATCG	F	KIF2B	NM_032559	TSS1500									51899386	51899509	NC_000017.10
cg04057161	0.140517	0.153063	0.135349	0.108399	0.0897579	0.149273	0.240325	0.274592	0.272625	0.193126	0.178814	0.269609	0.00062523	0.0293359	0.108789	37	4	54601212	CGGGATTAATGTTTCCACAACAGAATGTGAATATTATAAGCAAAGATATT	F							TRUE					54601212	54601335	NC_000004.11
cg01500527	0.663956	0.596628	0.657734	0.637269	0.668204	0.644842	0.723856	0.79844	0.793897	0.698139	0.797234	0.709214	0.00134655	0.0389649	0.108691	37	7	23291125	GGAGCCTTCAATGAAACTGTTGGGCTGTTGCTCTAGTCTTGCTTACCTCG	F	GPNMB;GPNMB	NM_002510;NM_001005340	Body;Body	chr7:23287221-23287508	S_Shelf							23291125	23291248	NC_000007.13
cg12800047	0.548813	0.491707	0.525962	0.549983	0.516595	0.530914	0.614559	0.609677	0.680273	0.626697	0.647852	0.636515	1.61e-05	0.0087646	0.1086	37	11	106566411	CGGCTAGACAGCCTGAAATCCCCTGAAATGCAGTGATTCATTCTCTGGAA	F	GUCY1A2	NM_000855	Body				TRUE					106566411	106566534	NC_000011.9
cg07664000	0.221336	0.112419	0.213749	0.123573	0.138232	0.173112	0.248238	0.272154	0.296019	0.259431	0.278857	0.279075	0.00146773	0.0402006	0.108559	37	17	28659293	CTATTATGCATTTAAAGTGAAGTCCCAGATGAATCATCCCAGCTATAACG	R	TMIGD1	NM_206832	5'UTR						17:28659256-28659576	Unclassified_Cell_type_specific		28659293	28659416	NC_000017.10
cg06266516	0.170047	0.139834	0.162712	0.113499	0.10935	0.165014	0.234489	0.244153	0.295914	0.189156	0.239835	0.308083	0.000743319	0.0313329	0.108529	37	7	79609099	CGATGGAACATTAGTCATGTAATTAGAGAAACTTCAGGTTAATCTCAGGG	F							TRUE					79609099	79609222	NC_000007.13
cg05154454	0.639445	0.51662	0.617692	0.592213	0.619712	0.62298	0.68503	0.745628	0.695829	0.677939	0.766131	0.688745	0.00103507	0.0353431	0.10844	37	9	113100053	CGGCAAGTATTTATTTGGCTTCACTGAGTATTTCAAATGTGGACATCTTG	R	TXNDC8	NM_001003936	1stExon				TRUE					113100053	113100176	NC_000009.11
cg10608166	0.340615	0.396885	0.42165	0.406024	0.402174	0.457397	0.459211	0.458467	0.597869	0.514752	0.510462	0.534225	0.00250579	0.0493571	0.108373	37	12	115887445	CGTGCCAGATTTGGCCCTGGAACCACCAACTTGAGACCTCTGGGTTGAAG	R				chr12:115889597-115889995	N_Shelf		TRUE					115887445	115887568	NC_000012.11
cg25883405	0.156214	0.0976136	0.103179	0.0872998	0.0770675	0.0847848	0.211627	0.175188	0.260995	0.145061	0.222136	0.24133	0.00066011	0.0299033	0.108363	37	7	104865796	CGCTAGAGCAAGCTGCAGTGAGCTGCCAACCAGCAGATCGTCTGCCTTAG	F	SRPK2;SRPK2	NM_182691;NM_182692	Body;Body				TRUE				TRUE	104865796	104865919	NC_000007.13
cg04261072	0.539391	0.538798	0.551229	0.52591	0.538701	0.575768	0.62951	0.640409	0.671279	0.62398	0.689824	0.664904	1.72e-05	0.00894117	0.108351	37	13	79977499	AGCAGAGCCTTATTTATTACAACATAATGACTGCAGTGCTACAGCCATCG	R	RBM26	NM_022118	Body	chr13:79980004-79980723	N_Shelf				13:79977431-79978000	Promoter_Associated		79977499	79977622	NC_000013.10
cg17931986	0.38683	0.434058	0.388179	0.350751	0.345224	0.339921	0.513784	0.497857	0.469216	0.480368	0.460689	0.472717	0.000226108	0.0203976	0.108278	37	6	33131274	CGGGAGGAGTGGCATCTGGGGCTCTTGGCCCTCCCACCTGGAGCCTGTTA	R	COL11A2;COL11A2;COL11A2	NM_080680;NM_080679;NM_080681	3'UTR;3'UTR;3'UTR	chr6:33129291-33129718	S_Shore							33131274	33131397	NC_000006.11
cg11228136	0.756039	0.724153	0.750063	0.752313	0.730643	0.776971	0.824345	0.845882	0.859975	0.839994	0.868626	0.898925	1.62e-05	0.00876932	0.107928	37	2	63971489	CGAGGAATGATGTGCCATTCTGAACCAAAGGCCAGCATAAAAGAAGGTCA	R							TRUE					63971489	63971612	NC_000002.11
cg23833425	0.429157	0.447456	0.436729	0.442028	0.461248	0.449618	0.535442	0.590816	0.549835	0.542619	0.566638	0.528332	1.39e-05	0.00843343	0.107908	37	6	142476640	CGTGAGGGAAGGTTTATATGAAAGTGTGGAATACGGAATTATTATACATG	F	VTA1	NM_016485	Body				TRUE					142476640	142476763	NC_000006.11
cg15695478	0.728016	0.707083	0.689168	0.712943	0.736423	0.762784	0.827947	0.82845	0.876916	0.791227	0.820388	0.838667	3.94e-05	0.0117232	0.107863	37	3	12049691	CGGAGATTCTGACCCCAGTGATCAAGTGAGCTTTTCATCCTGGCATGATG	F	SYN2;SYN2	NM_133625;NM_003178	Body;Body	chr3:12045652-12046627	S_Shelf							12049691	12049814	NC_000003.11
cg13909405	0.189796	0.20691	0.197036	0.193125	0.167609	0.210154	0.260123	0.264408	0.355574	0.280847	0.322508	0.327632	0.000537479	0.0278683	0.107744	37	2	37903481	CGACCTAAAATGAAGATGAAATGAAAAAGTGTTTTTAGAAGTATAGAAGG	R				chr2:37898142-37899830	S_Shelf							37903481	37903604	NC_000002.11
cg13232781	0.564161	0.590887	0.572581	0.519227	0.603832	0.611425	0.690425	0.699337	0.653941	0.626975	0.746572	0.689235	0.000627017	0.0293775	0.107396	37	10	81888928	CGGAAATGAGTAGCTAGCCAACTACTTTATGTTCAAAGTAGTGGTAAAAG	F				chr10:81892222-81892640	N_Shelf							81888928	81889051	NC_000010.10
cg01569984	0.157364	0.135684	0.143522	0.108654	0.126768	0.167701	0.262415	0.241181	0.257984	0.235543	0.227518	0.258657	3.52e-06	0.00543732	0.107267	37	3	54353711	CGCTCTCAGGGAGTCCTCAGGACTCTGTAAGAGTGTAAAGGGTCCTGAGA	R	CACNA2D3	NM_018398	Body									54353711	54353834	NC_000003.11
cg00758816	0.480014	0.362169	0.427	0.343357	0.370793	0.418242	0.561571	0.475284	0.49729	0.473249	0.486472	0.550835	0.00247227	0.0491307	0.107188	37	15	69843549	CGACAATGAGAAAAATCTGACATGGGAAAATTATGACAGTGAAAGAAATC	F							TRUE					69843549	69843672	NC_000015.9
cg02287606	0.576353	0.578821	0.576972	0.555837	0.593768	0.513673	0.706659	0.63893	0.697189	0.617049	0.700903	0.676754	0.00027438	0.022042	0.10701	37	4	176184545	CTGAAATATTCATCATATTGTCCCCACTCCTGTTATAAAATCTTTATTCG	F							TRUE					176184545	176184668	NC_000004.11
cg27606397	0.763994	0.716105	0.744383	0.73966	0.624695	0.738757	0.857515	0.850223	0.81662	0.78301	0.8502	0.811987	0.00183583	0.0437879	0.106993	37	2	173244251	ATGCATGCCTTTGTCCAGACTAGTGGGCATTGCTAGGCCTGAGATACTCG	R							TRUE					173244251	173244374	NC_000002.11
cg07986257	0.0902281	0.0984816	0.0768694	0.0673059	0.0658259	0.0920823	0.211491	0.187737	0.258217	0.140576	0.140421	0.192898	0.00145222	0.0400525	0.106758	37	6	22321172	ATCATTCTCATTCCTTTTGCTTGGTCACACAGTGTGAACCACATCAGACG	R							TRUE				TRUE	22321172	22321295	NC_000006.11
cg00813999	0.229156	0.216235	0.176025	0.266831	0.233501	0.242407	0.308476	0.351267	0.294979	0.362339	0.361302	0.325367	9.43e-05	0.0152717	0.106596	37	X	77582839	CGCAAAAGGACAGTAAACTGTGGACCTTGAAGTTAGCAGGTAAGGAGACT	R	CYSLTR1;CYSLTR1	NM_006639;NM_006639	5'UTR;1stExon				TRUE					77582839	77582962	NC_000023.10
cg15109449	0.694526	0.697484	0.710272	0.635018	0.642459	0.732248	0.837942	0.765981	0.797101	0.789255	0.789365	0.770986	0.000362455	0.0241789	0.106437	37	1	12363259	CGGGTTATTTGCCCTTGAGTTCCAGGACTCCTGTGTGTTTGGAATTGTTT	F	VPS13D;VPS13D	NM_015378;NM_018156	Body;Body				TRUE					12363259	12363382	NC_000001.10
cg27048208	0.421407	0.404585	0.386466	0.437656	0.395712	0.366075	0.556782	0.477838	0.487851	0.507504	0.495926	0.524164	5.05e-05	0.0123589	0.10636	37	10	75543235	CGGTATTTGTCCTGCTCCTAGGGCAAATCAGGAAGGAAAGAATTTCCAGG	R	CHCHD1	NM_203298	3'UTR	chr10:75541557-75542206	S_Shore							75543235	75543358	NC_000010.10
cg15835339	0.489191	0.484239	0.505012	0.470947	0.449498	0.472946	0.571759	0.56959	0.634636	0.525786	0.593137	0.614273	0.000415166	0.0255377	0.106225	37	10	10828105	CGGGGTCAGCCACACAGGAGCTGGAATTGCTCACAATTGCGCCACTGTCT	F	SFTA1P	NR_027082	Body				TRUE					10828105	10828228	NC_000010.10
ch.10.820670F	0.106855	0.0902426	0.110306	0.0639625	0.0685678	0.0837508	0.150702	0.194319	0.213186	0.143716	0.19063	0.268424	0.00131113	0.0385165	0.106215	36	10	32300362	CAATCCCAAGGGAGTAGAGGTTATAGTCATTGAATGACTGCTTGATACCA	F	KIF5B	NM_004521	3'UTR									32300362	32300485	NC_000010.10
cg13815695	0.575704	0.594886	0.58641	0.57503	0.622372	0.62587	0.707333	0.693696	0.700743	0.675931	0.701253	0.737967	6.85e-06	0.00678493	0.106108	37	12	104237895	CGGAAGACACAAAACAATGCTGAAATATGGAATGGCTCAGGAAAGGAAGC	R	LOC253724	NR_027249	Body	chr12:104234273-104235327	S_Shelf							104237895	104238018	NC_000012.11
cg10089919	0.651752	0.642854	0.656223	0.619724	0.664462	0.669674	0.754285	0.745385	0.725835	0.742384	0.765518	0.807915	3.96e-05	0.0117492	0.106105	37	1	216773389	CGGTTTAGGTTTTGTTAACAGGGGCTATTAGTGTGTGTGACTTCTTAATC	R	ESRRG;ESRRG;ESRRG;ESRRG;ESRRG	NM_206594;NM_206595;NM_001438;NM_001134285;NR_024099	Body;Body;Body;Body;Body	chr1:216774339-216774734	N_Shore							216773389	216773512	NC_000001.10
cg18480946	0.443824	0.484283	0.433012	0.470084	0.421076	0.421846	0.512812	0.578543	0.574364	0.524613	0.599703	0.520618	0.000268709	0.0218689	0.106088	37	3	85054782	CGTGCAGAGATGGAATAACGTGAGTTGTTTTACCAAGAAGCAGATGGTTC	F	CADM2;CADM2	NM_001167675;NM_001167674	Body;Body				TRUE					85054782	85054905	NC_000003.11
cg09413645	0.43443	0.452328	0.527422	0.494555	0.556236	0.485705	0.548981	0.558545	0.628638	0.604631	0.606423	0.639031	0.00138007	0.0393648	0.105929	37	4	77933741	CGGTAAATACCATCCACAGCTTAGTTTTGTGGTTGTTCTTGTTGCCATTT	R		NM_018243	Body				TRUE					77933741	77933864	NC_000004.11
cg00484803	0.728289	0.634621	0.713966	0.707483	0.72952	0.733387	0.817681	0.759283	0.832642	0.829715	0.82825	0.815189	0.000308129	0.0229073	0.105916	37	2	157196299	TCATTATTGACAAGCTCACCATCACTACTGATCACATTTAAGACACATCG	R				chr2:157198068-157199346	N_Shore							157196299	157196422	NC_000002.11
cg08125539	0.261244	0.210977	0.250942	0.198777	0.257379	0.238073	0.353237	0.371785	0.367331	0.301413	0.318508	0.34005	4.66e-05	0.01212	0.105822	37	17	47079959	CGAGGTAAAAGATAACATGTGACTACTATTCAACATGGAAGTTTAAAGTA	F	IGF2BP1;IGF2BP1	NM_006546;NM_001160423	Body;Body	chr17:47072820-47076042	S_Shelf							47079959	47080082	NC_000017.10
cg26870903	0.18394	0.205719	0.174281	0.179387	0.138693	0.192699	0.298558	0.265405	0.348356	0.206989	0.281242	0.307543	0.00157444	0.0412006	0.105562	37	1	166846008	ATACTTATTAAGCATCCACTATGTGCCAGGCGCTGCTCTAGAGAATTGCG	F	TADA1	NM_053053	TSS1500	chr1:166844996-166845773	S_Shore							166846008	166846131	NC_000001.10
cg05079547	0.192423	0.213609	0.179455	0.163158	0.153617	0.167396	0.304609	0.320175	0.293061	0.238931	0.284155	0.2589	6.19e-05	0.0132155	0.105029	37	11	131239592	AATTAGACCTCTTAAGAAATCATTTATGTCCATTAGATTATTTCTGTTCG	R	NTM	NM_001048209	TSS1500									131239592	131239715	NC_000011.9
cg07572909	0.206313	0.16183	0.158626	0.195429	0.181726	0.191498	0.259651	0.300315	0.312202	0.252881	0.231481	0.368128	0.00242776	0.0488027	0.104873	37	1	113467640	CGTGGGTGTAACAACTCAAGAGAATAGGAAATAGTATTATCCAAGAAAAC	F	SLC16A1;SLC16A1	NM_001166496;NM_003051	Body;Body						1:113467579-113467742	Gene_Associated_Cell_type_specific		113467640	113467763	NC_000001.10
cg18093572	0.62928	0.593668	0.611822	0.616045	0.605949	0.61688	0.65533	0.685914	0.760557	0.736954	0.737383	0.726713	0.000773415	0.0318374	0.104868	37	5	122598329	CGGGTGGTGTTACTACATGAGGCTGATGTCATCTTGCCATGAGTTAGTTT	F							TRUE					122598329	122598452	NC_000005.9
cg02964356	0.211125	0.142215	0.164934	0.0918548	0.125525	0.111215	0.241434	0.241554	0.301551	0.206154	0.217447	0.267603	0.000962408	0.034421	0.104812	37	12	49883750	ACAGATGGCAAATTCAAGGACTCAGTATTGTCTTCCGGATTCTAATATCG	R	SPATS2	NM_023071	Body				TRUE					49883750	49883873	NC_000012.11
cg19609912	0.679696	0.675831	0.666178	0.694299	0.643919	0.650883	0.796258	0.756738	0.741069	0.754401	0.782365	0.808465	2.45e-05	0.0100059	0.104749	37	15	45614704	CGGAAAGCTGCTAGGACTACTGTCTTGGCTGAGCCACAGCTGACACTGCC	R												45614704	45614827	NC_000015.9
cg22926869	0.671271	0.654687	0.644423	0.659691	0.654726	0.689328	0.780978	0.764304	0.785868	0.725178	0.767224	0.779047	5.62e-06	0.00644845	0.104745	37	3	108021293	CGGAATTTGAACCAATCAAAATGCAATTAGCAGGGGAAAATGTTGAGAGA	R	HHLA2	NM_007072	TSS200									108021293	108021416	NC_000003.11
cg27014522	0.413908	0.471753	0.464898	0.52158	0.490087	0.474085	0.53844	0.503979	0.599989	0.591955	0.611514	0.618391	0.00146923	0.0402136	0.104659	37	10	131200834	CTTTGCTGCTATGAAACGCTCTATTAGGAAAACTGTGTCTTCAGGCCACG	R								10:131090767-131090825				131200834	131200957	NC_000010.10
cg02791542	0.760618	0.779347	0.777006	0.793416	0.793446	0.802413	0.866251	0.889215	0.882446	0.898292	0.886667	0.91125	2.92e-07	0.00281084	0.104646	37	3	31777556	CGGCCAAAAGAAAGACATAGAATAGAATGGTGGTTGCTGAGGGTTGGAGA	F	OSBPL10	NM_017784	Body				TRUE					31777556	31777679	NC_000003.11
cg18610569	0.525525	0.502446	0.494876	0.528552	0.554999	0.50879	0.666951	0.597217	0.630912	0.559459	0.649788	0.638235	0.00047747	0.0268955	0.104562	37	4	126165298	CGCAGCAGAGAAACATTGAGGTTGGGGAATGTATTGCTTTTATAGCAAGT	R							TRUE					126165298	126165421	NC_000004.11
cg26942801	0.160976	0.145619	0.0976836	0.122545	0.123581	0.117969	0.316505	0.241644	0.219475	0.215423	0.206798	0.195679	0.00104032	0.0353949	0.104525	37	5	43039410	CGCGAAACAAGAAAGAAACATAAGGGAAAAAGAGAATTTAAAAACTGACA	F	C5orf39;C5orf39	NM_001014279;NM_001014279	1stExon;3'UTR	chr5:43040345-43040633	N_Shore	DMR						43039410	43039533	NC_000005.9
ch.18.773216R	0.0925389	0.107794	0.130006	0.100531	0.155778	0.137313	0.226015	0.273751	0.219834	0.18303	0.188432	0.260011	0.000291382	0.0224714	0.104519	36	18	40020331	CAGTAACCAAAACAGCATGGTTCTGGTAGCAAAACAGAGACACAGACTAA	F												40020331	40020454	NC_000018.9
cg07350311	0.584944	0.509416	0.560192	0.519432	0.569247	0.57195	0.638545	0.696295	0.622344	0.66859	0.643828	0.672376	0.000100778	0.0156593	0.104466	37	5	31401409	CGCTATTGTTGTTTTAATGATCTGTTTTTAGCTGGATGGTCTTTATTACA	R	RNASEN;RNASEN	NM_013235;NM_001100412	3'UTR;3'UTR									31401409	31401532	NC_000005.9
cg14830371	0.578847	0.629918	0.616859	0.644181	0.67187	0.598069	0.730982	0.692267	0.732741	0.689636	0.712787	0.808105	0.00103357	0.0353374	0.104463	37	8	25991602	CGGGTTCACACAGATGCAAGGAGCCTGGTCAATCAAAAATCATTGACACC	F							TRUE		8:25991159-25991808	Unclassified_Cell_type_specific	TRUE	25991602	25991725	NC_000008.10
cg16501561	0.521278	0.48551	0.450595	0.495308	0.529677	0.455806	0.548162	0.574278	0.63263	0.593835	0.585643	0.63009	0.000249444	0.0211113	0.104411	37	5	55460876	AGGCAAAGGACTAATTGAAGCGTCCCTTAGCTTGTTTATAAGCAGCTTCG	R	ANKRD55	NM_024669	Body				TRUE					55460876	55460999	NC_000005.9
cg01858089	0.521893	0.455881	0.514007	0.490738	0.533797	0.499415	0.579686	0.646566	0.591069	0.586557	0.650643	0.587631	0.000145793	0.0175752	0.104404	37	4	125448037	CGCCAGTTGTGTTTACTTCAGTGCTAAAAGGGTATATTTCCTGTTTAAAT	F							TRUE					125448037	125448160	NC_000004.11
cg07958689	0.148143	0.120509	0.148155	0.113941	0.101937	0.165366	0.223063	0.259232	0.238964	0.238703	0.211654	0.25242	1.3e-05	0.00827199	0.104331	37	17	39010551	CGACGCTATGACCTTGGTTGGTAAGAATATGGTCATTTTAGTTACTGACT	R							TRUE					39010551	39010674	NC_000017.10
cg17106157	0.241705	0.216902	0.196786	0.209598	0.172021	0.205891	0.318048	0.297631	0.288344	0.262908	0.379085	0.322484	0.000513259	0.0274363	0.104266	37	18	19410150	CGTGCATGGTGTAATTCTAATGCTGCATTGCTGAAACTGCTGTAGTGCTG	R	MIR1-2;MIB1	NR_029662;NM_020774	TSS1500;Body									19410150	19410273	NC_000018.9
cg14913178	0.259018	0.146318	0.169629	0.1702	0.217799	0.159427	0.336704	0.331133	0.279156	0.236792	0.263174	0.300769	0.00134653	0.0389649	0.104223	37	6	27521267	TCTGTAGTTGTGCTGTCATGTCTGTAGTCATGCTGTCATGTCTGTAGTCG	F						CDMR		6:27629187-27629310	6:27521010-27521553	Unclassified_Cell_type_specific		27521267	27521390	NC_000006.11
cg06946850	0.287143	0.291015	0.268061	0.256712	0.228497	0.242535	0.329155	0.356197	0.380584	0.387618	0.426355	0.31933	0.000532657	0.0278113	0.104213	37	16	29877776	TTATGTGCCTTGTTTAGAGCCTTACACACTTTCCTGGCTGGGTGTGGTCG	R	LOC440356;LOC440356	NR_024370;NR_015396	Body;Body	chr16:29873918-29874516	S_Shelf							29877776	29877899	NC_000016.9
cg09744840	0.115252	0.0901304	0.123123	0.0799781	0.122035	0.10486	0.191306	0.237586	0.258728	0.185425	0.153227	0.233556	0.000647011	0.0297111	0.104075	37	10	74469027	CGGCAGCTATCAGAATTCTGGCAGTGCAAAATACAGGATACAGTGGGGAC	R	CCDC109A	NM_138357	Body				TRUE					74469027	74469150	NC_000010.10
cg08452348	0.753361	0.737892	0.743894	0.756277	0.707206	0.74627	0.855767	0.852852	0.823921	0.872973	0.841774	0.821949	2.49e-06	0.00486011	0.104056	37	5	134303703	CGCCACTCGAGAGTCATTTCTAGTTCACCAGTTGACACTACATCGGTGGG	F	CATSPER3	NM_178019	1stExon									134303703	134303826	NC_000005.9
cg07772904	0.119508	0.128721	0.161708	0.116276	0.126361	0.119093	0.266886	0.181071	0.254242	0.234227	0.242988	0.21636	9.63e-05	0.0153653	0.104018	37	22	21618908	CGTGAAACAGGTCTCTATACAGCATATAAACAACTACCAGCATGCACAGG	F				chr22:21622176-21622503	N_Shelf							21618908	21619031	NC_000022.10
ch.7.125108021R	0.110366	0.079571	0.103269	0.0548672	0.073821	0.119737	0.212937	0.199994	0.221982	0.149459	0.158455	0.222425	0.000126772	0.0168875	0.103937	36	7	125320785	CAATCATGCCTGATGTTTCAGAATCTGGATATGTCAGAGAAGGAAATTTG	F												125320785	125320908	NC_000007.13
cg05926770	0.661898	0.670488	0.684706	0.661091	0.695947	0.677463	0.722303	0.731409	0.782912	0.790726	0.819607	0.828252	0.001532	0.0408044	0.103936	37	7	7101738	GAAAGGATGTTATTACTCCCGACATTGAAGGGGTTGTACCCCTCGACACG	R								7:7067960-7068288				7101738	7101861	NC_000007.13
cg25799589	0.252535	0.26549	0.282271	0.319871	0.327318	0.294481	0.355516	0.396313	0.357893	0.437686	0.450348	0.366844	0.000741544	0.0313088	0.103772	37	4	146800380	CAGAGCTGAATCCTTGCTCTGTCCTTTGCAGCCGAAACCTTTAAGTCTCG	R	ZNF827	NM_178835	Body				TRUE					146800380	146800503	NC_000004.11
cg00149684	0.185967	0.176285	0.260438	0.186495	0.222822	0.245619	0.289973	0.348593	0.340089	0.309008	0.294206	0.317806	0.000229479	0.0205136	0.103675	37	1	155097375	CGTGCTGGGAGCCAACACAAGCACACAATTTTGCGGCGAGAGGCAGCACG	F				chr1:155098434-155100451	N_Shore						TRUE	155097375	155097498	NC_000001.10
cg04728180	0.780647	0.724078	0.716493	0.689736	0.688646	0.758645	0.807478	0.832496	0.856847	0.825784	0.812439	0.8449	0.000385016	0.0248148	0.103616	37	2	191401926	TGTCCAGTCTGCTGATAAGCCCATTGAAAGAATTCTTCATTTCTGATACG	F				chr2:191399089-191399742	S_Shelf							191401926	191402049	NC_000002.11
cg03862987	0.636961	0.624744	0.618298	0.606859	0.61986	0.656319	0.646055	0.733213	0.768762	0.765297	0.728935	0.742407	0.00144068	0.0399539	0.103604	37	4	76596784	CAAGCATTCTGGTTCACTCTTGATGTTTTTTCACTATTACTAATATTTCG	R	G3BP2;G3BP2;G3BP2	NM_203505;NM_203504;NM_012297	5'UTR;5'UTR;5'UTR	chr4:76597635-76598920	N_Shore							76596784	76596907	NC_000004.11
cg13861749	0.323526	0.391105	0.41461	0.396676	0.402038	0.442214	0.455329	0.514588	0.475458	0.520887	0.54412	0.480986	0.000665342	0.0299712	0.103533	37	18	70533078	CGGGGTTACTTGGAGGTTCAGAACATTTTTGTAGGCAACATTCCAATAAT	R	NETO1;NETO1;NETO1	NM_138966;NM_138999;NM_153181	Body;TSS200;TSS200	chr18:70533965-70536871	N_Shore							70533078	70533201	NC_000018.9
cg15284177	0.416658	0.420621	0.475514	0.456251	0.400226	0.414892	0.552609	0.523941	0.515003	0.58225	0.48296	0.548242	0.000240734	0.0208703	0.103474	37	7	137029097	CGTCAAAGTAGCTCAAACTCTGAGGTTTGTAAAACTTGGAGGCTGGGCTT	F	PTN	NM_002825	TSS1500									137029097	137029220	NC_000007.13
cg26125060	0.134866	0.201502	0.14503	0.125177	0.116578	0.161448	0.265651	0.214394	0.263076	0.214136	0.227149	0.320302	0.000741597	0.0313088	0.103351	37	5	160112854	CGGGGGTTCTGCTAAATAGCCTACGATACACAGGACACCACCGGGGAACA	R	ATP10B	NM_025153	Body				TRUE					160112854	160112977	NC_000005.9
cg15689121	0.401643	0.38105	0.445686	0.474838	0.460224	0.433048	0.545219	0.527693	0.484071	0.547232	0.520832	0.591428	0.000507108	0.0273447	0.103331	37	1	38618977	GGCCCTGACTCATCTTGAGCTCAACTTAGCATTTAGATATATCTGGAGCG	R							TRUE					38618977	38619100	NC_000001.10
cg23429457	0.15435	0.101717	0.117895	0.0750333	0.0824232	0.114472	0.195321	0.226858	0.215887	0.177055	0.187512	0.263115	0.000144416	0.0175006	0.10331	37	14	35135441	CGACAACAGGATGTAAGCTCAGCTTTATGAAGCATATTTATTGTCAGAGT	F							TRUE		14:35135144-35135614	Unclassified_Cell_type_specific		35135441	35135564	NC_000014.8
cg06088575	0.544671	0.599918	0.577096	0.555857	0.536884	0.567195	0.634637	0.650632	0.641151	0.679287	0.656616	0.739078	0.000456955	0.0264432	0.103297	37	3	447414	CTACAGCAACTTTTCCCCTTCGGGCATAAACACAACATATGTAAGCAACG	R	CHL1	NM_006614	3'UTR									447414	447537	NC_000003.11
cg13734061	0.712027	0.705617	0.744217	0.658939	0.701301	0.714136	0.789771	0.776282	0.851502	0.782877	0.830184	0.824956	0.000111837	0.0162468	0.103223	37	10	123260355	CGGCCACGGTGACCGCCTCCTTGGGCTTGTCTTTGTCAATTCCCACTGCT	F	FGFR2;FGFR2;FGFR2;FGFR2;FGFR2;FGFR2;FGFR2;FGFR2;FGFR2	NM_001144914;NM_001144915;NM_022970;NM_001144913;NM_001144916;NM_000141;NM_001144917;NM_001144919;NM_001144918	Body;Body;Body;Body;Body;Body;Body;Body;Body					10:123250306-123250398				123260355	123260478	NC_000010.10
cg22305850	0.394595	0.362614	0.389251	0.383938	0.368683	0.374041	0.503782	0.478812	0.446771	0.511005	0.467598	0.484079	1.81e-05	0.00911035	0.103154	37	2	100824103	GCTCCCTTCCCCACATGAGCCTGGGGAGCTTAGCTCTGATAAGTACATCG	R							TRUE					100824103	100824226	NC_000002.11
cg04144218	0.766249	0.721316	0.707678	0.758092	0.738267	0.809724	0.801838	0.796315	0.859987	0.866696	0.883768	0.911519	0.0016874	0.0423724	0.103133	37	7	69559531	CGCATTGGGATGCCTAAGAAGGGCTAGAGTGAAAAGGGAGAAGAAAACAG	R	AUTS2;AUTS2;AUTS2	NM_015570;NM_001127232;NM_001127231	Body;Body;Body				TRUE					69559531	69559654	NC_000007.13
cg02764250	0.635632	0.616567	0.687796	0.653806	0.68851	0.645344	0.770757	0.718426	0.75374	0.717343	0.802974	0.782981	0.000260299	0.0215433	0.103095	37	10	97145217	ACTAACCTGCAAAGACAAGTCAAAGAATCCACTGTATGGTGGTGACTTCG	R	SORBS1;SORBS1;SORBS1;SORBS1;SORBS1;SORBS1;SORBS1	NM_006434;NM_001034956;NM_015385;NM_001034957;NM_001034954;NM_001034955;NM_024991	Body;Body;Body;Body;Body;Body;Body									97145217	97145340	NC_000010.10
cg23415373	0.657525	0.619624	0.641411	0.680827	0.698393	0.665518	0.753149	0.761205	0.853853	0.743048	0.71127	0.759232	0.00182223	0.0436736	0.103076	37	6	91086362	CGCAAACAGAATTGGTATATTTGAAGGAATCAGTCTCCCTTGTGCTGGGA	F							TRUE					91086362	91086485	NC_000006.11
cg12298697	0.649279	0.672072	0.623561	0.610282	0.617005	0.653082	0.73424	0.728616	0.723931	0.702316	0.731713	0.82283	0.000801492	0.0322761	0.103061	37	6	32850425	ACAGTATTTTTGTCACTCCAAGTATCCCTTATCTTGCCCTTTTATGGTCG	F				chr6:32847498-32847846	S_Shelf							32850425	32850548	NC_000006.11
cg16632707	0.629339	0.649564	0.676097	0.69308	0.716907	0.711021	0.789219	0.737643	0.822584	0.729522	0.798292	0.817013	0.000779845	0.0319583	0.103044	37	10	26931969	CGTGGAAGTCCAAGCACTGGCTCACAAGGCCCCGCCCCCACAGCGACCCC	R	LOC731789	NR_026794	TSS200					10:26971909-26972111				26931969	26932092	NC_000010.10
cg26348614	0.175603	0.163042	0.199932	0.117621	0.166093	0.155323	0.256168	0.229186	0.255389	0.230138	0.312359	0.312424	0.000410016	0.0253817	0.103009	37	5	75820852	CGCATGCATAATGCATAGGCATGGGTTTCCTCAATGAAAATAAGACAGAG	R	IQGAP2	NM_006633	Body				TRUE					75820852	75820975	NC_000005.9
cg08641935	0.0956444	0.0724064	0.0942757	0.101168	0.0670268	0.0993336	0.195114	0.188268	0.238788	0.161269	0.181557	0.182689	3.05e-05	0.0109853	0.102972	37	2	173575577	CGAGTGAGTCATTATATCCACATTGTGGAGAAGGCTCTCATGCCACTAAA	F							TRUE		2:173575220-173575687	Unclassified_Cell_type_specific	TRUE	173575577	173575700	NC_000002.11
cg27423838	0.32132	0.308338	0.287349	0.303259	0.30872	0.32088	0.402621	0.396868	0.395899	0.43676	0.430196	0.404424	1.03e-06	0.00373802	0.102817	37	3	39388759	AAACCTAGATAATCAACTCCTGCACAGAGGGAGTGCTTTCTGGGTAATCG	R							TRUE					39388759	39388882	NC_000003.11
cg04448240	0.609705	0.631067	0.610815	0.612164	0.613241	0.644665	0.763403	0.674911	0.670565	0.731119	0.744053	0.753705	0.000937359	0.0340866	0.102683	37	11	28831268	CTTTTCCGGGTTTCTGCAGCACTAAGATTCTTCTATATTTTATCACATCG	F							TRUE					28831268	28831391	NC_000011.9
cg05609780	0.633432	0.515474	0.545723	0.534819	0.55809	0.576859	0.668145	0.6901	0.661931	0.631297	0.642676	0.685869	0.000753438	0.0315067	0.102603	37	3	24001171	CGGAGAAGTATTCAACAAAACATCCAGTACAAGAAGTGCCTGAAGAATGA	F	NR1D2;NR1D2	NM_001145425;NM_005126	Body;Body				TRUE					24001171	24001294	NC_000003.11
cg07393618	0.516138	0.495488	0.517102	0.481694	0.423681	0.499339	0.555255	0.598395	0.597874	0.545552	0.620565	0.630369	0.00043112	0.0258381	0.102428	37	16	81715664	TGGCCAACGTGACGAAATCCTGTTTCTACTAAAAATACAAATATTAGCCG	R	CMIP;CMIP	NM_030629;NM_198390	Body;Body	chr16:81711864-81712214	S_Shelf							81715664	81715787	NC_000016.9
cg06005688	0.541087	0.513902	0.574782	0.528319	0.548158	0.594406	0.653212	0.642188	0.670019	0.633542	0.707834	0.608289	0.000261494	0.0215771	0.102405	37	4	41872254	GGAGCCCCAGTTTTCCAGCCTGCCTGTAGATAAATCCTGACGTTATTACG	F				chr4:41875445-41875794	N_Shelf							41872254	41872377	NC_000004.11
cg23136573	0.558331	0.612352	0.552853	0.610092	0.567711	0.547347	0.714882	0.712207	0.63894	0.641925	0.722779	0.630802	0.0011323	0.0365096	0.102142	37	6	52230573	CGAGGAAATACAGACTCCAAATAAGTGGAGTCAGTGCTCCCAGTTACTTT	F	PAQR8	NM_133367	5'UTR	chr6:52226753-52228006	S_Shelf							52230573	52230696	NC_000006.11
cg02423044	0.178712	0.151981	0.192661	0.137146	0.153724	0.129026	0.292924	0.266801	0.275755	0.229527	0.256514	0.234222	2.74e-05	0.0105125	0.102082	37	7	130419932	CGAGGGAAAAAATGAGAGCAATGAAGACACGTAAAAGAAACCGTACATGC	R	KLF14	NM_138693	TSS1500	chr7:130417912-130419378	S_Shore							130419932	130420055	NC_000007.13
cg22435132	0.662358	0.714545	0.663273	0.601854	0.631241	0.668999	0.746392	0.813439	0.739107	0.765342	0.745873	0.744465	0.000465284	0.0266205	0.102058	37	17	59312558	TTTCAAAGAGACCAAATGAGTTGACACATTTAAAGTGCTTAGGACAGGCG	F	BCAS3;BCAS3	NM_001099432;NM_017679	Body;Body				TRUE					59312558	59312681	NC_000017.10
cg01363170	0.22616	0.140783	0.136123	0.113915	0.135244	0.13966	0.290028	0.26633	0.29914	0.204979	0.206144	0.236806	0.00134193	0.0388904	0.101923	37	7	27236674	CGAATGTGCTGGTTGAAATAACTGCTTGATTAAAAATGTGCTGTGAAGAT	F	HOXA13	NM_000522	3'UTR	chr7:27238690-27240311	N_Shelf				7:27235671-27236827	Unclassified		27236674	27236797	NC_000007.13
cg16564302	0.394558	0.425544	0.452613	0.45204	0.428316	0.465417	0.564262	0.493402	0.484223	0.537757	0.593664	0.556504	0.000931906	0.0340183	0.101887	37	20	9816944	CGTCATATTCACAGGTTCTGGATGGGCATGAATTCTTGGGAGACACTCTT	R	PAK7;PAK7	NM_020341;NM_177990	5'UTR;5'UTR	chr20:9819271-9819861	N_Shelf							9816944	9817067	NC_000020.10
cg18215726	0.672628	0.609424	0.648433	0.604493	0.684074	0.647105	0.75787	0.7131	0.773203	0.743525	0.786602	0.701237	0.000327546	0.0234115	0.101563	37	13	24896584	CGAACAATGATTTGTTGGGTAAAATGGTGATTAAAACCTAGGTTAGAAAA	R	C1QTNF9	NM_178540	3'UTR								TRUE	24896584	24896707	NC_000013.10
cg00303223	0.15801	0.137806	0.146853	0.165222	0.163323	0.167278	0.256407	0.290947	0.297717	0.206905	0.242531	0.253229	0.000347978	0.0238187	0.101541	37	3	157814981	CGAGGAGAGAGAAAAATAATATTAACACAAAAAAATGCCACAGACAATGA	R	SHOX2;SHOX2;SHOX2	NM_003030;NM_001163678;NM_006884	3'UTR;3'UTR;3'UTR	chr3:157815581-157816095	N_Shore							157814981	157815104	NC_000003.11
cg08826743	0.224535	0.190762	0.235184	0.252594	0.237186	0.200172	0.335648	0.388371	0.347914	0.280619	0.277847	0.318932	0.000930914	0.0339935	0.101483	37	8	105392295	TAACAGGACTATCTAGCCCAAAGTCTCAACATTTTTGTCATTTTCAGACG	F	DPYS	NM_001385	3'UTR				TRUE					105392295	105392418	NC_000008.10
cg10741418	0.130338	0.0817438	0.118787	0.0670575	0.0786245	0.125209	0.224478	0.224969	0.232564	0.124327	0.185945	0.217811	0.00080494	0.032303	0.101389	37	14	73927547	CGCCAAGACATAAGGCAAGCCTGAGCTAACATCCCATAACATGTGAAGTA	F				chr14:73924588-73924980	S_Shelf							73927547	73927670	NC_000014.8
cg06135425	0.632239	0.597608	0.64992	0.627073	0.637086	0.551177	0.736023	0.744355	0.671242	0.72044	0.765743	0.665429	0.001067	0.0357046	0.101355	37	6	136316734	GCACAGAACATATAGGTATGCTGGTCACTTTTAAGAACTTCACCACAACG	F	PDE7B	NM_018945	Body				TRUE					136316734	136316857	NC_000006.11
cg06790197	0.76065	0.754819	0.769187	0.807573	0.797864	0.775811	0.87434	0.874777	0.872234	0.886257	0.878157	0.887904	2.91e-05	0.0108315	0.101294	37	16	73265937	CGGGAGCTCCCCGACCATTTGGCTCTTGATTCTTCGGGGAAAGCAGCTGT	F							TRUE	16:71823432-71823639				73265937	73266060	NC_000016.9
cg11866107	0.161702	0.122883	0.149578	0.0873343	0.118952	0.148422	0.263939	0.206671	0.2454	0.162411	0.2327	0.284732	0.00114007	0.0366234	0.101164	37	14	60650956	CGGAGAGCTTAAAAGGCTTTCTAAAGGCCACAGAGCCCCAGGTTTAAAGG	F							TRUE		14:60650424-60651428	Unclassified		60650956	60651079	NC_000014.8
cg12643502	0.641424	0.60931	0.593963	0.601246	0.649691	0.637561	0.734406	0.640332	0.767162	0.742679	0.753618	0.701745	0.00172143	0.0427267	0.101124	37	1	117151711	CGCCTGGTTAAACCTTAGTAGGTACTTTCCCACTGAGTAAGTACTTAGTA	F	IGSF3;IGSF3	NM_001007237;NM_001542	Body;Body									117151711	117151834	NC_000001.10
cg08817540	0.601121	0.612417	0.684163	0.604339	0.616614	0.643772	0.681551	0.698084	0.757994	0.714469	0.742452	0.774512	0.000453199	0.0263548	0.101106	37	3	108020727	ACACAAACCACAGAGCTCATAGGCAATACTTGGTAAATGCGAGTCACTCG	F	HHLA2	NM_007072	TSS1500									108020727	108020850	NC_000003.11
cg10616902	0.238277	0.17441	0.183235	0.150005	0.144495	0.150144	0.290434	0.248919	0.263389	0.297973	0.248947	0.297051	0.000282303	0.0222174	0.101025	37	4	189554990	CGTGTATAAATGGCTAATAAACACAAGAAAAGATGTACGGTATCATTAAT	F				chr4:189552385-189552791	S_Shelf							189554990	189555113	NC_000004.11
cg00297966	0.223755	0.144424	0.225631	0.158	0.172222	0.173884	0.248279	0.331254	0.30691	0.207513	0.281867	0.328092	0.00245265	0.0489987	0.101	37	8	126186709	CACCAGTACGGGAATTCTAATGCTGTATTCTGTGTAAATAAATCATTCCG	R	NSMCE2	NM_173685	Body				TRUE					126186709	126186832	NC_000008.10
cg26247064	0.135795	0.0959963	0.151397	0.0960722	0.103874	0.139485	0.178793	0.282725	0.237079	0.147543	0.236195	0.246055	0.00248758	0.049264	0.100962	37	11	74466198	CAAATGTTTCCTGTATTGGTATAACACATAAGGACACTCTCAAATTCTCG	F	RNF169	NM_001098638	Body				TRUE				TRUE	74466198	74466321	NC_000011.9
cg11635125	0.622516	0.595367	0.613756	0.586904	0.57178	0.61143	0.680158	0.646525	0.697293	0.702336	0.718381	0.762793	0.000628401	0.0294005	0.100955	37	11	108728931	CGGAAACAGTTCAGAGGAAAAAGCAATGAAGGAGAAGATATCCTAGGCAG	R	DDX10	NM_004398	Body				TRUE					108728931	108729054	NC_000011.9
cg13663057	0.547947	0.532678	0.483466	0.464984	0.482054	0.489674	0.577135	0.563716	0.621286	0.617023	0.614758	0.612598	0.000162084	0.0181838	0.100952	37	6	78002283	CGGGGAGGTGTGCCTCACTCAAGGGAAATTATAATATACATGCAGACACT	F							TRUE					78002283	78002406	NC_000006.11
cg24889827	0.679628	0.681774	0.678406	0.7257	0.708213	0.698225	0.789774	0.792403	0.775659	0.754222	0.856742	0.808433	0.000286671	0.0223616	0.100881	37	12	93444286	CATTCTTATTCCTTAGAGTTCTGATGATCATACTTTGCCTAGGACATTCG	R							TRUE					93444286	93444409	NC_000012.11
cg02935917	0.627418	0.676425	0.658071	0.680067	0.68148	0.730996	0.757395	0.750153	0.786073	0.774575	0.778727	0.812796	0.000215018	0.0201916	0.100877	37	10	120704529	CGGACATAAAAATTTCAGATCCCAACAGATATGAAATTTATCTGATTAGG	R							TRUE					120704529	120704652	NC_000010.10
cg06175075	0.638688	0.554985	0.625509	0.581535	0.58692	0.640557	0.739209	0.710075	0.674961	0.633819	0.721265	0.753747	0.00158547	0.0412901	0.100814	37	4	146055261	TAAGACATGCACCCACCCCTCTTCTAAGATTTTCTAAAACTTGTATTTCG	R	OTUD4;OTUD4	NM_199324;NM_001102653	3'UTR;3'UTR									146055261	146055384	NC_000004.11
cg02878385	0.60657	0.659093	0.657892	0.62436	0.70872	0.675995	0.759181	0.7185	0.770433	0.779943	0.763073	0.74603	0.000369031	0.0243597	0.100755	37	10	91858201	CGGGGTTTAAACTCAGACTCTGAAGGATGTATGTGACATACACTATTTTA	F							TRUE					91858201	91858324	NC_000010.10
cg06633978	0.382964	0.504162	0.438017	0.40846	0.433464	0.425612	0.521863	0.487358	0.532712	0.547058	0.546846	0.561372	0.000750287	0.0314531	0.100755	37	16	75353806	CGTGGAAACGAATATTTCTTTGTTGAAATCCATTGTATTGCCTTAGCAAA	R	CFDP1	NM_006324	Body				TRUE		16:75353238-75353958	Unclassified		75353806	75353929	NC_000016.9
cg23230834	0.127881	0.083881	0.136046	0.0786942	0.0852933	0.10006	0.205698	0.196844	0.265333	0.145105	0.177404	0.225535	0.000819229	0.0325051	0.100677	37	7	20198439	AGGAGCAGACTTGATTTCCTCCTTCTTCTGCAAATAGCCTGGCAGATTCG	R	MACC1	NM_182762	Body				TRUE					20198439	20198562	NC_000007.13
cg08303253	0.306983	0.291452	0.252522	0.22366	0.289486	0.295643	0.419544	0.341688	0.429099	0.369647	0.385764	0.317771	0.0012603	0.0379587	0.100628	37	22	42070666	CGGTGCCACCACCCTGCTTCTGTCTGCTCTGAACACTTGTTCCAAAAAGG	F	NHP2L1;NHP2L1	NM_001003796;NM_005008	3'UTR;3'UTR									42070666	42070789	NC_000022.10
cg16116006	0.277316	0.267071	0.305841	0.238903	0.215463	0.268895	0.375048	0.373308	0.307319	0.391786	0.368802	0.360457	0.000187608	0.0191214	0.100538	37	X	31526745	CGGCAGCTCTCTGAGGAATGTTCCCTTGGCTTTGACTATTCTGCTGGGAA	R	DMD;DMD;DMD;DMD;DMD;DMD;DMD;DMD;DMD;DMD;DMD;DMD;DMD	NM_004013;NM_004023;NM_004009;NM_004007;NM_004010;NM_004006;NM_004022;NM_004014;NM_004012;NM_004011;NM_004020;NM_000109;NM_004021	Body;Body;Body;Body;Body;Body;Body;TSS1500;Body;Body;Body;Body;Body									31526745	31526868	NC_000023.10
cg24926589	0.602037	0.540535	0.554159	0.534493	0.540635	0.627977	0.659849	0.685416	0.653936	0.622986	0.685179	0.695451	0.000582381	0.0286283	0.100497	37	2	182551611	CAATACGGGTTTCTTATTAAAATAAAATCTCTGACTAAATCTACCTTTCG	R				chr2:182547873-182549177	S_Shelf							182551611	182551734	NC_000002.11
cg18025438	0.714942	0.760954	0.712432	0.681227	0.711537	0.77429	0.837382	0.773102	0.83268	0.828466	0.848841	0.836137	0.000294738	0.0225773	0.100204	37	1	228756789	CGCCTTTACCGCCCACCTACACCCCCGCCGCAGCCGCAGCCGGGGTCCTC	R				chr1:228744110-228784168	Island							228756789	228756912	NC_000001.10
cg19053250	0.652419	0.660582	0.639586	0.616075	0.628098	0.644933	0.692005	0.768712	0.729277	0.700013	0.788383	0.764034	0.000834445	0.0327265	0.100122	37	2	210676351	CGGGAATTTAGGGATTGTAGAAGGCTTCTTTTCATATGACTGCCAACTCA	F	UNC80;UNC80	NM_032504;NM_182587	Body;Body	chr2:210673292-210673546	S_Shelf							210676351	210676474	NC_000002.11
cg14797990	0.607099	0.585352	0.671192	0.695191	0.686837	0.646211	0.747198	0.717127	0.711685	0.755178	0.815091	0.745937	0.00184389	0.0438677	0.100056	37	9	108424668	TGATTGGTATCACATGTCCTGCCAAGAACCTGAGATGTTAGATTTTCTCG	F	TAL2	NM_005421	TSS200									108424668	108424791	NC_000009.11
cg11290949	0.624032	0.57475	0.640977	0.577892	0.622503	0.593474	0.704982	0.683005	0.687229	0.705186	0.757835	0.695448	8.27e-05	0.0146153	0.10001	37	6	55778951	CGGCTTGGTTGTTTTCATATAACCAAGGTTAGGCCTTGTATGGAAAGGAC	R							TRUE					55778951	55779074	NC_000006.11
cg15358855	0.168331	0.111726	0.182054	0.118015	0.118984	0.138434	0.265074	0.287807	0.241324	0.157728	0.238154	0.24746	0.00136986	0.0392477	0.1	37	11	129830237	CGCTAAGAACAGCCAAAATAACATGTGGTTGGTTCTAGCAGCAATCTGAA	F	PRDM10;PRDM10	NM_199437;NM_020228	Body;Body				TRUE				TRUE	129830237	129830360	NC_000011.9
cg04224041	0.807689	0.730585	0.731553	0.744519	0.767443	0.779995	0.883359	0.869447	0.859599	0.844214	0.846022	0.859038	0.000149074	0.0177078	0.0999826	37	4	1220556	CGCCACCACAGAGACAAAGGCGGGAGGAGGCTGGCACACAGGTTTGGCCC	F	CTBP1;CTBP1	NM_001328;NM_001012614	Body;Body	chr4:1221837-1222050	N_Shore			4:1210529-1211634				1220556	1220679	NC_000004.11
cg24535650	0.646397	0.666027	0.69176	0.594834	0.646508	0.618509	0.714513	0.744813	0.740125	0.716315	0.786714	0.761229	0.00027543	0.0220789	0.0999456	37	1	85510988	CGCTGCAATTTTAACCAGCAAACATCTCCATCTGAGGAGCTTCTATTAGA	R	MCOLN3	NM_018298	Body	chr1:85513509-85514555	N_Shelf							85510988	85511111	NC_000001.10
cg09757127	0.800175	0.79342	0.774225	0.812582	0.752664	0.721307	0.871212	0.88974	0.890129	0.890154	0.89439	0.818231	0.000299146	0.022705	0.0999138	37	1	3810632	CGGTTCATGGAGAAACCGATAAAATACAAATAAAATCTATAGTTTAGTGA	R	C1orf174	NM_207356	Body	chr1:3808490-3809236	S_Shore							3810632	3810755	NC_000001.10
cg08570639	0.441432	0.473054	0.453314	0.541558	0.532819	0.502915	0.61017	0.547784	0.590424	0.59504	0.609916	0.590864	0.000953601	0.0343239	0.099851	37	6	113371757	TTTATTTCCCTTCTGTGCTCTTCACTGTAAATTAATTCTTCAGCCAAACG	F							TRUE					113371757	113371880	NC_000006.11
cg23479191	0.171146	0.136643	0.175443	0.116131	0.134766	0.163307	0.27398	0.236557	0.322806	0.188275	0.233111	0.241619	0.00160832	0.0415715	0.0998189	37	10	54338992	CTTCCTGTTTTGTTTCTCTTTAAGCACAATGGCAGCCAGTTGTTCCTGCG	F							TRUE					54338992	54339115	NC_000010.10
cg15727157	0.783757	0.699116	0.728792	0.688774	0.753051	0.665485	0.829438	0.814267	0.818206	0.867116	0.788126	0.800323	0.00131189	0.0385165	0.0997503	37	7	90094649	CGCATGGCAGCAGGAAGGAGAAGTGCCAAACAAAGAGGGAAAAGCCCCTT	R												90094649	90094772	NC_000007.13
cg12114888	0.159179	0.133643	0.190389	0.108827	0.121277	0.119974	0.199272	0.275423	0.30789	0.212103	0.202481	0.233981	0.00142972	0.0398925	0.0996432	37	8	107738435	CGTGATTTTATGTAACTTAATTTGCCCTGGAAAGGAAATGTCTCGTCTCT	F	OXR1;OXR1	NM_181354;NM_018002	Body;Body				TRUE		8:107738096-107738530	Promoter_Associated	TRUE	107738435	107738558	NC_000008.10
cg23743845	0.57364	0.594433	0.494669	0.566995	0.588777	0.55391	0.706989	0.678776	0.603585	0.617752	0.659522	0.70329	0.00161961	0.0416679	0.0995818	37	6	32732247	CTGGCCCAATATGACCTGTAACTCTAAACATTTGCTCCATCATTAATACG	F	HLA-DQB2	NR_003937	TSS1500	chr6:32729342-32729877	S_Shelf							32732247	32732370	NC_000006.11
cg00419390	0.526966	0.525917	0.643506	0.571308	0.572805	0.615973	0.655905	0.695399	0.656999	0.700779	0.656674	0.685226	0.00227096	0.0475803	0.0990846	37	X	57024196	CGCTATGGTAAATGGAATTGTTTACTGTGATATTGTGAAATATATATTTG	F				chrX:57021591-57022044	S_Shelf							57024196	57024319	NC_000023.10
cg07392722	0.475663	0.51975	0.552468	0.48351	0.517074	0.506076	0.563404	0.587226	0.637691	0.604316	0.615974	0.639739	0.000138761	0.0172782	0.0989679	37	X	102317796	CGGAAACAGACCCCTGCTTTCGAATTTACATGTTCATGATGTGCCCTTGT	R	BEX1	NM_018476	3'UTR	chrX:102318601-102319304	N_Shore							102317796	102317919	NC_000023.10
cg11420761	0.11229	0.0774083	0.0895372	0.0599456	0.0866632	0.094464	0.191677	0.200083	0.205115	0.111469	0.170356	0.235347	0.00127097	0.0381146	0.0989564	37	11	105958762	CGCCACACTGTGGCATTATGGTGGATATACAGTGGGCAAATATTGTGTTA	R	AASDHPPT	NM_015423	Body				TRUE		11:105958612-105958902	Unclassified_Cell_type_specific		105958762	105958885	NC_000011.9
cg25066281	0.276628	0.272799	0.249893	0.206402	0.2187	0.238498	0.338832	0.291729	0.328076	0.305248	0.392168	0.400119	0.00155914	0.0410764	0.0988754	37	11	84634409	CGCTGAATTCTCATCTAATTGAAATTACTGGGCATAATGCTATATATAGC	R	DLG2;DLG2;DLG2	NM_001364;NM_001142699;NM_001364	1stExon;Body;5'UTR				TRUE					84634409	84634532	NC_000011.9
cg16179048	0.521254	0.509927	0.509364	0.534802	0.521077	0.523016	0.589927	0.627889	0.648595	0.609671	0.621643	0.614682	8.36e-06	0.00712082	0.098828	37	2	107536149	CGCTTAGTGTAAATCTGAAAGGGAAGTCAGGGCACTATAATGAAATATGC	F							TRUE					107536149	107536272	NC_000002.11
cg05283992	0.345496	0.332445	0.296369	0.377482	0.389892	0.353768	0.497373	0.402509	0.39587	0.44157	0.474973	0.476006	0.00125583	0.037918	0.0988081	37	11	25794249	CGAAGTTCTGTGTCTCAGGAACATCCAAAATGTAGAGGCATAGAACCATT	R						DMR						25794249	25794372	NC_000011.9
cg19933985	0.640197	0.649685	0.590014	0.579546	0.534483	0.578239	0.677257	0.690566	0.70762	0.739807	0.679942	0.669777	0.00122565	0.0375724	0.0988008	37	5	141739077	GCCGTTATCTGCAGTCCATCATTAACTGAACCATCATTATGCAGCCTACG	F				chr5:141736249-141736980	S_Shelf		TRUE					141739077	141739200	NC_000005.9
cg08340277	0.542685	0.575254	0.606973	0.550264	0.539728	0.601737	0.645123	0.644608	0.732686	0.64815	0.695683	0.64315	0.000581569	0.0286144	0.0987932	37	10	79790139	TTCAGACGCCATGGATCCTCACTAGCAAAACACAATGTCACAGACAAACG	R	POLR3A	NM_007055	TSS1500	chr10:79789138-79789441	S_Shore				10:79788213-79790156	Promoter_Associated		79790139	79790262	NC_000010.10
cg04597985	0.707921	0.662438	0.709857	0.645049	0.6668	0.689453	0.808828	0.754146	0.778913	0.758603	0.792235	0.781282	3.76e-05	0.0116428	0.0987479	37	4	138114706	CGTAGGGGAGAAAGATAACCCATCCCTGTTTATGGGTAAGAGGGTTGCAT	F												138114706	138114829	NC_000004.11
cg11944076	0.468778	0.513567	0.505459	0.518987	0.498057	0.512706	0.559833	0.603751	0.610263	0.616097	0.587876	0.630846	2.32e-05	0.0098284	0.0985186	37	15	51997390	CGATTGCTATACATGGGTCACTTCCAGAGGGGATGATTGAGGCACACTGG	R	SCG3;SCG3	NM_001165257;NM_013243	Body;Body						15:51997373-51997412	Unclassified_Cell_type_specific		51997390	51997513	NC_000015.9
cg16716983	0.127817	0.127838	0.106159	0.137281	0.150455	0.102133	0.197177	0.185171	0.226895	0.222941	0.218141	0.292358	0.000565621	0.0283467	0.0985	37	X	100474247	CGCTTGTTAAAGAGAAGAGGGTATGAGCTCCAAACACCCTCAGAGACCTG	R	DRP2;DRP2	NM_001939;NM_001171184	TSS1500;TSS1500									100474247	100474370	NC_000023.10
cg05336056	0.667326	0.620391	0.684903	0.620042	0.646107	0.632464	0.724347	0.731451	0.719433	0.728743	0.758618	0.796655	0.00012816	0.0169039	0.0980021	37	2	170142388	ACCTATGCAACATTTATTATCTTAGACATGGCTCCCCAGTGAATACCTCG	F	LRP2	NM_004525	Body				TRUE					170142388	170142511	NC_000002.11
cg08611402	0.118676	0.0868491	0.118973	0.0613392	0.0803748	0.0975102	0.188641	0.173513	0.246482	0.140784	0.179793	0.222282	0.000531802	0.0277991	0.0979619	37	4	80933006	AGATGCAGATGACACAGTCCCTGAATACACTAATCCCAGACATCAGCTCG	F	ANTXR2;ANTXR2	NM_058172;NM_001145794	Body;Body				TRUE					80933006	80933129	NC_000004.11
cg06094588	0.72502	0.710427	0.644221	0.700393	0.654284	0.649976	0.747696	0.769743	0.755356	0.804885	0.77971	0.813966	0.0003713	0.0244098	0.0978393	37	3	42724640	TGCTTTAAATGCTGAAGAGTCAGCAGTGAGCAAATCAGGCAGGAATTCCG	F				chr3:42727084-42727916	N_Shelf							42724640	42724763	NC_000003.11
cg03517913	0.640173	0.62238	0.662185	0.654097	0.63702	0.659829	0.691996	0.782148	0.760528	0.727033	0.762694	0.73786	0.000232739	0.0206459	0.0977626	37	3	110027072	AAATGACTGCAGTCAATTAACCTCATAGCCCACCTTCCAGTAATCACACG	F							TRUE					110027072	110027195	NC_000003.11
cg17171259	0.133384	0.105399	0.137828	0.148396	0.138042	0.115513	0.237426	0.223328	0.265922	0.179983	0.238642	0.219429	8.7e-05	0.0148932	0.0976947	37	1	64469027	CGTACTGCAATATAGGTAGTGTGACTGGGTAATTGAGCAGGGGTTTAAAG	F	ROR1;ROR1	NM_005012;NM_001083592	Body;Body				TRUE					64469027	64469150	NC_000001.10
cg08019151	0.706173	0.699321	0.635814	0.748466	0.698148	0.733	0.763186	0.770986	0.780727	0.807924	0.840653	0.843558	0.0010503	0.0355302	0.0976854	37	3	38836991	CGGCTAGTTTTGAAAAAATTTTTTTGTAGGCAGTGTACCACTATATTGTC	F	SCN10A	NM_006514	TSS1500									38836991	38837114	NC_000003.11
cg19553169	0.534078	0.587892	0.525716	0.569511	0.599258	0.506007	0.605368	0.64537	0.690566	0.609971	0.64986	0.706003	0.00156611	0.0411179	0.0974459	37	4	17234719	CATACTCAGCCACCATTGGTAGGAGACAACTTAGCCTTTGTCCTTATTCG	F							TRUE					17234719	17234842	NC_000004.11
cg19331777	0.119048	0.0866814	0.107303	0.0886876	0.0880896	0.132474	0.222667	0.157522	0.251184	0.157492	0.172169	0.245557	0.00168804	0.0423732	0.0973846	37	10	30344362	CGTGTCAGTTAGCAACATACTCCATTCTGGTTTGTTTTATGTCTTGGTGA	R	KIAA1462	NM_020848	5'UTR	chr10:30347599-30348416	N_Shelf							30344362	30344485	NC_000010.10
cg26950867	0.149855	0.0820328	0.116189	0.0881315	0.0823502	0.103167	0.206222	0.200071	0.241605	0.142354	0.191441	0.223638	0.000297279	0.0226536	0.0972675	37	2	216299856	CGGAAAGAATTCCAACCTCTGTTCTTGGTGAAGTATCCTGAGCGGCCCTA	F	FN1;FN1;FN1;FN1;FN1;FN1;FN1	NM_054034;NM_212475;NM_212476;NM_212478;NM_212474;NM_212482;NM_002026	Body;Body;Body;Body;Body;Body;Body	chr2:216300267-216300997	N_Shore	RDMR			2:216299759-216300020	Unclassified_Cell_type_specific		216299856	216299979	NC_000002.11
cg20207414	0.2335	0.17681	0.28697	0.277065	0.197469	0.235768	0.339843	0.303547	0.301312	0.358143	0.327851	0.360111	0.00136962	0.0392451	0.0972042	37	12	55423208	CGAGGATAGACCCTCCTACAGCCGCTCACAAAGGTAAGTGCAGTATATAC	R	NEUROD4	NM_021191	3'UTR									55423208	55423331	NC_000012.11
cg03352332	0.681882	0.680978	0.706399	0.741538	0.723477	0.676379	0.772063	0.765628	0.832869	0.824433	0.781684	0.816713	0.00013193	0.0170081	0.0971228	37	3	186360953	GTCTAAACTACTCAGGGAACACATAATGCACTGCCTTGATTTGAGGGTCG	R	FETUB	NM_014375	Body				TRUE					186360953	186361076	NC_000003.11
cg16883935	0.729864	0.682137	0.767054	0.704721	0.748193	0.744082	0.812719	0.753715	0.829806	0.837862	0.856211	0.868432	0.00108791	0.03599	0.0971158	37	8	12869602	CGTGCCTTGGTTGCGCCAGTGTACTGAGCCCTGTGGACATCACCTCATTA	F	C8orf79;C8orf79	NM_001099677;NM_020844	TSS200;Body									12869602	12869725	NC_000008.10
cg14210817	0.495845	0.396365	0.443226	0.415903	0.419549	0.465693	0.51737	0.531452	0.546758	0.579479	0.557752	0.486431	0.000690323	0.0304357	0.0971101	37	13	93877559	CGGTGAGGTTGATAGGCTCAGGAATTGCAGTCAAGTTATTACTTCTGTCA	R				chr13:93879245-93880877	N_Shore	RDMR	TRUE					93877559	93877682	NC_000013.10
cg15991082	0.104707	0.0685192	0.103797	0.0638857	0.0640804	0.101529	0.180791	0.210561	0.216972	0.111855	0.138652	0.230188	0.0025877	0.0499735	0.0970833	37	1	85872804	CGTGAGAAAACTTCCTGCTCATAACTCTTCAGAAATATGTGTGTGGAGGA	R	DDAH1;DDAH1	NM_012137;NM_001134445	Body;5'UTR				TRUE					85872804	85872927	NC_000001.10
cg09101062	0.394963	0.412177	0.406492	0.469168	0.398312	0.421919	0.485774	0.54063	0.54988	0.475468	0.501553	0.531938	0.00018944	0.019198	0.0970355	37	5	43487508	CGGGAATTAAAGAGTAGGATGACAGGATTATAAGGAATCTGTGTAGTGTC	F	C5orf34	NM_198566	Body	chr5:43483519-43484555	S_Shelf							43487508	43487631	NC_000005.9
cg10806586	0.471104	0.472083	0.479326	0.522919	0.507675	0.51608	0.570591	0.545826	0.641587	0.565317	0.62153	0.605972	0.00051725	0.0274767	0.0969393	37	14	45366116	CGGTTTTTTAAGCGTTTAAGTATTTACTTAGAAAACAGTTGAATTGATCT	R	C14orf28	NM_001017923	TSS1500	chr14:45366387-45367108	N_Shore				14:45365935-45367300	Unclassified		45366116	45366239	NC_000014.8
cg23349726	0.686362	0.66635	0.694713	0.706351	0.702232	0.69425	0.783896	0.718112	0.827621	0.768552	0.812952	0.820418	0.00146985	0.0402136	0.0968821	37	2	21320297	CGCTGAGGAAAACACTGAAGAAGCAGAAAGCCTGGGAGTGTTGAGGCCAC	R							TRUE					21320297	21320420	NC_000002.11
cg16288630	0.462314	0.451448	0.487254	0.464526	0.470426	0.432115	0.596204	0.498954	0.557219	0.585579	0.57862	0.532002	0.000585989	0.028701	0.0967492	37	5	17925497	TCCCAGACACAGAGAGCTTGAATGCTTGAGATGAAAACACACACACTACG	R						RDMR						17925497	17925620	NC_000005.9
cg04332927	0.237093	0.238524	0.23588	0.233448	0.238211	0.246579	0.297789	0.311838	0.326044	0.324475	0.391784	0.357912	0.00087998	0.0333407	0.0966844	37	6	44039484	CGGAGAGAGTTGATGAAGTGATAAAGTACTATAAAAGTAGACACAAGAAC	F				chr6:44041014-44041468	N_Shore	RDMR					TRUE	44039484	44039607	NC_000006.11
cg06044004	0.168531	0.155504	0.148897	0.128616	0.134301	0.0865884	0.232342	0.168565	0.262659	0.206047	0.265344	0.266982	0.000928484	0.0339698	0.0965834	37	10	69192583	CGTTGTCATGGGCTGAATGGTGACCCCCAAAAAGATAAATTCATGTCCTA	R	CTNNA3;CTNNA3	NM_001127384;NM_013266	Body;Body									69192583	69192706	NC_000010.10
cg27228986	0.706853	0.662051	0.668728	0.646531	0.664845	0.697843	0.732139	0.756537	0.798645	0.771584	0.791858	0.775439	3.46e-05	0.0113282	0.0965584	37	2	179897289	CGGGAAATACCAGAGCAAGGACATATGAAAACACTGCTGGTTTGGTGGTA	F							TRUE					179897289	179897412	NC_000002.11
cg08604181	0.161597	0.11932	0.125339	0.0826952	0.100272	0.1067	0.244193	0.223508	0.23701	0.140831	0.186519	0.243081	0.00108975	0.0360099	0.0965365	37	7	133040186	AAAGTATGAATATACATATGCAAAACTTCACATAGGAATTCCGGGTTTCG	F	EXOC4;EXOC4	NM_021807;NM_001037126	Body;Body				TRUE					133040186	133040309	NC_000007.13
cg07677157	0.108086	0.102116	0.0844467	0.0718668	0.0653423	0.0892977	0.162309	0.202406	0.252513	0.117139	0.182635	0.183051	0.00216298	0.0466391	0.0964828	37	12	66050928	CGGTGATCCATAGCAAAAGAGCCTATGAGTCAGGTGATGATCCATTCATC	R							TRUE				TRUE	66050928	66051051	NC_000012.11
cg05189667	0.565225	0.537453	0.543625	0.597005	0.582937	0.579324	0.73154	0.646829	0.661233	0.615008	0.676698	0.653096	0.000748237	0.0314133	0.0964726	37	5	54742635	CGGGGAGGATGCTGCCACTCTTCGGGAGTTCTCACATTATCCACATGTCT	F	PPAP2A;PPAP2A	NM_176895;NM_003711	Body;Body				TRUE		5:54742623-54742836	Unclassified_Cell_type_specific		54742635	54742758	NC_000005.9
cg26706961	0.52218	0.575618	0.579038	0.573284	0.540273	0.596452	0.629984	0.613889	0.709792	0.652723	0.675804	0.683158	0.000460618	0.0265392	0.0964172	37	2	174869013	AGATCACAATATTACACAATATATCCATGTAACAAACCTGCACAGGTACG	R							TRUE					174869013	174869136	NC_000002.11
cg14662210	0.460837	0.469724	0.451158	0.46339	0.473976	0.409335	0.561202	0.517152	0.55176	0.546455	0.546085	0.584054	2.55e-05	0.0101964	0.0963812	37	7	132872450	CGCTTTTGTGATTAACATGGCTAATTGCTACACTGCCTGACCTGATAAAT	R							TRUE					132872450	132872573	NC_000007.13
cg00863913	0.693064	0.740159	0.73678	0.75013	0.718821	0.669972	0.836369	0.825171	0.799162	0.785427	0.810989	0.829483	0.000160187	0.0181204	0.0962793	37	8	144939685	TCATTTTCCATCAGCCAGTGTCTACTATTTAGTGCCCTGGCTCTATTTCG	F				chr8:144940233-144940817	N_Shore							144939685	144939808	NC_000008.10
cg13574150	0.613455	0.611025	0.634049	0.614564	0.595537	0.643657	0.682849	0.665559	0.726874	0.712152	0.763748	0.738369	0.000561758	0.0282874	0.0962109	37	7	10447387	ACAAGTTTATCTGCCTGTCCCTATGTTAACAACCTCTTGCCTTTCCATCG	F							TRUE					10447387	10447510	NC_000007.13
cg09172244	0.506686	0.490282	0.518143	0.600449	0.573638	0.573697	0.609848	0.631447	0.679598	0.636555	0.67149	0.611056	0.00184224	0.0438504	0.0961834	37	5	158251744	CGCCAGGCCCTGGCCTATGCCTGTGAATTGTCAGCTTGGACGCCAGTCCC	F	EBF1	NM_024007	Body				TRUE					158251744	158251867	NC_000005.9
cg20597477	0.178403	0.147544	0.172099	0.199849	0.196565	0.249726	0.317748	0.256329	0.323116	0.308312	0.266078	0.249696	0.00060242	0.0289536	0.0961822	37	15	40211272	GAGAATTACCTGTACTTCTCACTACTCTTAAATGATAATAGTCTTTATCG	F	GPR176	NM_007223	Body	chr15:40211961-40213444	N_Shore				15:40211199-40211417	Unclassified_Cell_type_specific	TRUE	40211272	40211395	NC_000015.9
cg24492778	0.168014	0.150449	0.204645	0.142717	0.131493	0.171003	0.264813	0.247984	0.297122	0.204007	0.23666	0.294819	0.000454346	0.0263773	0.0961807	37	15	57414740	TCAGAGAAATCTGAGTTCGTTCTACTTCCTCAATCACAACTTAATAGTCG	F	TCF12;TCF12;TCF12;TCF12	NM_003205;NM_207037;NM_207036;NM_207038	Body;Body;Body;Body				TRUE					57414740	57414863	NC_000015.9
cg23884423	0.133357	0.155134	0.162413	0.126741	0.0960968	0.17404	0.182218	0.235029	0.28553	0.194195	0.277002	0.249494	0.00136633	0.039202	0.0959475	37	11	80527133	CAAACTTGAATTTTAACTCACATTAAGTATTAATGAGTTTACATTCACCG	R							TRUE					80527133	80527256	NC_000011.9
cg17883068	0.121892	0.0755789	0.136163	0.107599	0.109488	0.105755	0.203371	0.185398	0.240812	0.191453	0.198121	0.212792	8.41e-06	0.00713223	0.095912	37	15	57277634	TGAGTCAGAAGCCAAACTAATTTTGGCTACTAAATTAGTTACTTCCCTCG	R	TCF12;TCF12;TCF12;TCF12	NM_003205;NM_207037;NM_207036;NM_207038	Body;Body;Body;Body				TRUE					57277634	57277757	NC_000015.9
cg00729133	0.588038	0.621494	0.662435	0.589358	0.620512	0.650109	0.71863	0.745813	0.706445	0.669388	0.75329	0.713148	0.000271479	0.0219706	0.0957944	37	7	88425077	CGGGCATACGTGAGTCAGAATGTCAGCACCATTAAAGGACCAGAGCGCCA	F	ZNF804B;MGC26647	NM_181646;NM_152706	Body;TSS200									88425077	88425200	NC_000007.13
cg18403478	0.689482	0.682172	0.627921	0.700068	0.696811	0.656884	0.762155	0.710839	0.847557	0.768578	0.787333	0.751064	0.00204721	0.0456041	0.0956977	37	17	1683424	AACTATTTCAAAAAATATTCACCAAAATAGGTGTCTCTCTGACTGCAACG	R	SMYD4	NM_052928	3'UTR								TRUE	1683424	1683547	NC_000017.10
cg18943134	0.476027	0.462461	0.499516	0.502781	0.427395	0.474624	0.540212	0.606843	0.583645	0.598804	0.565518	0.521767	0.000339262	0.0236411	0.0956643	37	2	191564311	TGCATCAATTATTTTTCCCAATTACCCTGTTTGGTAGCACTCTCTTAACG	F							TRUE					191564311	191564434	NC_000002.11
cg12077664	0.705472	0.729278	0.665433	0.695823	0.650768	0.692906	0.772021	0.753946	0.78637	0.814757	0.814153	0.772033	0.000101653	0.0157099	0.0956	37	12	125145446	AGGCATGATGAAAATTAAAAGTCTCCATCACCTTGTGTCTGGCTGCAGCG	R				chr12:125145445-125145669	Island			12:123711399-123711622				125145446	125145569	NC_000012.11
cg23838231	0.307931	0.291981	0.33124	0.338653	0.319279	0.338389	0.405979	0.439564	0.420725	0.413742	0.451875	0.368937	0.000100977	0.0156701	0.0955583	37	2	38306612	AGCCTGCGTAGATTCTCACTAGAGGCAGGGCTCTGCCTTGAGTTGGGTCG	F				chr2:38301276-38304518	S_Shelf							38306612	38306735	NC_000002.11
cg07933656	0.537398	0.476462	0.470598	0.538824	0.501646	0.553473	0.627749	0.582364	0.590184	0.61069	0.6013	0.63912	0.000405582	0.0252787	0.0955009	37	17	20445757	CGACTGAATGAATTAATGAACAAATGAAGTAGTATACTTCCTAGATGAGA	F												20445757	20445880	NC_000017.10
cg03372385	0.467321	0.510444	0.47611	0.482845	0.473621	0.500641	0.577746	0.548745	0.580495	0.594989	0.590127	0.59141	1.95e-06	0.00455205	0.0954216	37	6	25324431	CGCCTAGCATGGGATTTGCTACCCTCTGTGGCAGCAGCAGACAGGAGAAG	R	LRRC16A	NM_017640	Body				TRUE					25324431	25324554	NC_000006.11
cg16699818	0.570965	0.612649	0.552559	0.490866	0.553253	0.555709	0.64558	0.630041	0.65682	0.630239	0.676939	0.668681	0.00093085	0.0339935	0.0953834	37	16	48479333	CGCTGGGGACTTCAGGCCACGAAAACAAGGCAAAATGATAACATTTCAAA	R							TRUE					48479333	48479456	NC_000016.9
cg26990380	0.198815	0.163694	0.119325	0.170218	0.15174	0.186568	0.265361	0.291422	0.299397	0.199127	0.280411	0.226151	0.000955545	0.0343501	0.0952514	37	4	95469305	CGAGCACACACAAAAAAGTGTGAAAGAACAGAGTACAGTTGGCATCAAGA	R	PDLIM5;PDLIM5;PDLIM5;PDLIM5;PDLIM5	NR_024179;NM_001011515;NM_006457;NM_001011516;NM_001011513	Body;Body;Body;Body;Body				TRUE					95469305	95469428	NC_000004.11
cg26099158	0.288327	0.227311	0.253766	0.242374	0.229495	0.318296	0.390843	0.339874	0.36495	0.342744	0.336871	0.355764	0.000526654	0.0276914	0.0952463	37	12	89646052	TATACCTTGTGTTTGATTCATAACTACTACATCAACTCTCAGATTAAACG	F							TRUE					89646052	89646175	NC_000012.11
cg06189235	0.638807	0.673876	0.709912	0.739277	0.640184	0.710266	0.761024	0.722243	0.768257	0.810482	0.831854	0.789813	0.00208733	0.0459435	0.0952253	37	1	167175573	CGAGCTGCTAGCTGGTCAACAGACACACTCAACTAGAATCTGGGTCTGGC	R							TRUE					167175573	167175696	NC_000001.10
cg26281107	0.256555	0.179104	0.186568	0.209815	0.217185	0.208933	0.275056	0.330648	0.276297	0.379056	0.282035	0.286385	0.00131329	0.0385286	0.0952194	37	4	187927166	GCTATAAAATGGCACATTAAATATTAACTCCACAAAGTTGTAACCACTCG	F							TRUE					187927166	187927289	NC_000004.11
cg21090457	0.613829	0.535549	0.597078	0.581685	0.569652	0.614837	0.664133	0.685461	0.662639	0.685194	0.711624	0.673246	0.00015139	0.0177737	0.0949444	37	3	77573709	CGTGAGGAGTTGTTTGTTTGTAGAAGCAGCAGGGTTTCTTTTATACTTGA	F	ROBO2;ROBO2	NM_001128929;NM_002942	Body;Body				TRUE					77573709	77573832	NC_000003.11
cg07185287	0.706557	0.735424	0.696593	0.701793	0.741649	0.724412	0.824292	0.766957	0.786745	0.808402	0.841232	0.84837	0.000212795	0.0200754	0.0949283	37	10	79797844	CCACTGCAATTACTTTTGCACCAGCCTAAATAGCACTGGCATTATAATCG	F	RPS24;RPS24;RPS24;RPS24;RPS24;RPS24	NM_001142285;NM_001142282;NM_033022;NM_001142283;NM_001026;NM_001142284	Body;Body;Body;3'UTR;Body;3'UTR	chr10:79793494-79793952	S_Shelf							79797844	79797967	NC_000010.10
cg01626112	0.543813	0.499127	0.499003	0.473553	0.489646	0.512033	0.659723	0.544593	0.58975	0.557018	0.617101	0.618556	0.00156134	0.0410944	0.0949276	37	12	76653220	CACTTAAACTGTGGGGGGTTACTAACAACATATACCCTTTCCCCCATTCG	F							TRUE					76653220	76653343	NC_000012.11
ch.12.77661295R	0.12532	0.0650963	0.100352	0.0778275	0.0689245	0.0888628	0.191728	0.192831	0.207336	0.126266	0.194403	0.183238	0.000103287	0.0157553	0.0949031	36	12	79137164	CAGTTAGGAGAAATTTCAAGAGATCCATTGTACAGCAAGGTGATTATAGT	F												79137164	79137287	NC_000012.11
cg27640763	0.212806	0.18604	0.196004	0.198011	0.154276	0.15232	0.289986	0.318081	0.284327	0.226941	0.299603	0.249622	0.000327485	0.0234115	0.0948505	37	12	91503109	CGGTGGTCAATGAACACCACCCAGAAACCTCTTACAGGAAGGCATTTCAT	R	LUM	NM_002345	5'UTR						12:91502686-91503366	Unclassified		91503109	91503232	NC_000012.11
cg09111484	0.698792	0.703214	0.751701	0.702592	0.703635	0.725286	0.780579	0.806704	0.835724	0.772641	0.818427	0.839607	7.93e-05	0.0143959	0.0947438	37	12	80749651	CGCCAGTTTGTGAACGAGAAGCTGAAGTTGTCATGGGCATCATTGATAAA	F												80749651	80749774	NC_000012.11
cg13176070	0.167641	0.126786	0.158638	0.114858	0.148434	0.126212	0.270904	0.220287	0.259295	0.169615	0.210296	0.280093	0.00156431	0.041109	0.0946536	37	2	32503943	CGCTTCCTCAGAATAATACAAGGAAATCTGTAGAGGCTACTGGAAACACA	R	YIPF4	NM_032312	Body	chr2:32502965-32503471	S_Shore	CDMR						32503943	32504066	NC_000002.11
cg09811386	0.756195	0.714147	0.764896	0.751365	0.737398	0.792708	0.834533	0.875272	0.869492	0.798004	0.841367	0.865555	0.000157656	0.0179958	0.0945857	37	8	32452582	CGGGAAGTTTAATTTCAGAGATAAGTAAGTGGCTGACTTTATCCATGGTT	R	NRG1;NRG1;NRG1;NRG1;NRG1;NRG1;NRG1;NRG1;NRG1;NRG1;NRG1;NRG1;NRG1;NRG1;NRG1	NM_013960;NM_001159999;NM_001159995;NM_001160005;NM_013958;NM_013964;NM_013957;NM_013956;NM_001160001;NM_004495;NM_001160008;NM_013962;NM_001160004;NM_001160007;NM_001160002	Body;TSS1500;TSS1500;Body;Body;Body;Body;Body;TSS1500;Body;Body;Body;Body;Body;Body									32452582	32452705	NC_000008.10
cg24615157	0.211161	0.165955	0.209657	0.181795	0.185083	0.109226	0.284718	0.31259	0.307436	0.278759	0.207046	0.238681	0.001996	0.0451824	0.0943919	37	7	75957376	CGTCTCGGGAGTTCCTCGTCACTGACTTTATATATATAAAAAAAAGAATG	F	YWHAG	NM_012479	3'UTR	chr7:75958865-75959074	N_Shore		TRUE					75957376	75957499	NC_000007.13
cg09277575	0.492073	0.469034	0.453271	0.462334	0.456362	0.506479	0.562423	0.53768	0.617724	0.538961	0.540806	0.608223	0.000569153	0.028385	0.0943773	37	7	137760222	CGTTGTTTGAGCTGGAAACCTTGTCACTCCAAGGACAGTCAGTAAACACT	F	AKR1D1	NM_005989	TSS1500									137760222	137760345	NC_000007.13
cg20525763	0.132998	0.110709	0.126075	0.0785988	0.0799729	0.126657	0.186021	0.230816	0.258238	0.158049	0.158222	0.229763	0.00143357	0.0399168	0.09435	37	10	49571897	AGCCCTTACCTGAACCTAGCTTTACATATATGTGATGGCAGATTTCCTCG	R							TRUE		10:49571559-49571974	Unclassified_Cell_type_specific		49571897	49572020	NC_000010.10
cg12803053	0.142444	0.106514	0.12514	0.0988631	0.0941115	0.104405	0.193547	0.222583	0.272823	0.155131	0.185322	0.207719	0.00114177	0.0366277	0.0942744	37	8	126142264	AGTAAGCTCCAGACTTTATTTGGATTTCACTGATATCCTTTTAAAGAACG	R	NSMCE2	NM_173685	Body				TRUE					126142264	126142387	NC_000008.10
cg08284310	0.681042	0.711507	0.687125	0.701636	0.676358	0.661498	0.751204	0.781066	0.815771	0.791369	0.777337	0.767865	1.25e-05	0.00824324	0.094241	37	12	2864481	CGGAGATGTATATATTTGTCAAAATTCATTGAACTGTGCAATCAAGATGA	R				chr12:2861782-2862472	S_Shelf							2864481	2864604	NC_000012.11
cg00664117	0.138685	0.0830319	0.106095	0.0790869	0.0716187	0.127898	0.2004	0.225623	0.244527	0.118	0.179566	0.203323	0.00190428	0.0443254	0.0941705	37	6	18752614	CGCCTTCCCAGAGGCAGCTACCCAAATTGCAGGTAGAGTGCCCGAAAGAA	R							TRUE					18752614	18752737	NC_000006.11
cg11331078	0.561668	0.554997	0.625894	0.548089	0.627415	0.614138	0.686852	0.636067	0.735373	0.67959	0.722303	0.634539	0.0023065	0.0478791	0.0937538	37	10	2373651	CCCCAGCACTTTTATTTTAGGTATGGGAGCACACGTGCAGGTCCGTTTCG	F								10:2363523-2363657				2373651	2373774	NC_000010.10
cg07197493	0.167393	0.158789	0.17806	0.114407	0.150951	0.137645	0.230338	0.259528	0.308034	0.177705	0.225833	0.268228	0.00208963	0.0459513	0.093737	37	11	9884649	CGGGCTGTTTTTTCTAGATAAAGAAGGAAGTCAACACATTCTTAAACATC	R	SBF2	NM_030962	Body				TRUE					9884649	9884772	NC_000011.9
cg22791307	0.105543	0.0696765	0.0981927	0.0847236	0.0772386	0.106741	0.162912	0.166174	0.176485	0.132193	0.224944	0.241815	0.00166111	0.0421424	0.0937346	37	12	26250346	TCAATTGCTATTTCTTTATTGGCAAAGAAACACCTTAAATCTTCAGAACG	F									12:26249905-26250654	Unclassified	TRUE	26250346	26250469	NC_000012.11
cg01834225	0.684817	0.636467	0.633094	0.658789	0.659751	0.694268	0.732201	0.728997	0.789189	0.810049	0.724278	0.744403	0.000545875	0.0279603	0.093655	37	16	63848719	CGTGTGTAATGTAATGTTCCTTTTAGAATATGGCAAGTGCCATGCTGAGG	R							TRUE					63848719	63848842	NC_000016.9
cg19336191	0.685003	0.744897	0.745284	0.754498	0.713372	0.801905	0.838837	0.838054	0.779265	0.838103	0.857003	0.855602	0.00108112	0.0358902	0.0936509	37	11	110122959	AATAAATGCTTACTAATGAAGAGCTCTAACATTTATCCAGGAGAACTACG	R	RDX	NM_002906	Body				TRUE					110122959	110123082	NC_000011.9
cg24478034	0.673978	0.58841	0.649478	0.715748	0.647891	0.668124	0.740856	0.745236	0.713692	0.729823	0.78189	0.793824	0.00158485	0.0412853	0.0936155	37	4	155433727	CGTAAGTTTAAATTCTGACCTGACTGTATTTCAAACCAGAAGCGACTGAG	F							TRUE					155433727	155433850	NC_000004.11
cg26806260	0.707626	0.692921	0.739373	0.747967	0.753524	0.77175	0.850546	0.838116	0.836787	0.801484	0.806555	0.841308	0.000138974	0.0172782	0.0936058	37	15	62356512	GCATTTTCATGCATATCTTTTTAACCCCCACAACAATCTTAATGTGGTCG	R				chr15:62359827-62360995	N_Shelf							62356512	62356635	NC_000015.9
cg15086653	0.656596	0.627056	0.593344	0.661626	0.622936	0.596408	0.697867	0.72222	0.767873	0.695427	0.75277	0.683387	0.000479473	0.0269192	0.0935966	37	1	38026153	CGGCATCTTAGGGCAAAGCAATTGTTCAGGGTACAGGTCAAAATGGAGTT	F	DNALI1	NM_003462	Body	chr1:38022452-38022719	S_Shelf							38026153	38026276	NC_000001.10
cg10785153	0.174405	0.174102	0.218254	0.171896	0.159987	0.130652	0.26552	0.298257	0.288044	0.192273	0.269723	0.27688	0.000813068	0.0324287	0.0935668	37	13	48011758	CGTAAACAAAGCTTGACTCATTCTGTGTGGCACTGGAAAGGAGGCCAGAA	F							TRUE					48011758	48011881	NC_000013.10
cg14716792	0.604161	0.636785	0.582089	0.596443	0.616293	0.62333	0.717906	0.737007	0.69732	0.683738	0.687065	0.69734	1.06e-05	0.00783587	0.093546	37	11	55134268	ATACAAATCAAAGTCGGGGGGCAATGCAGAGACATTTTCCCCACTTTTCG	F	OR4A15	NM_001005275	TSS1500									55134268	55134391	NC_000011.9
ch.7.2253199F	0.148375	0.117459	0.114208	0.0884478	0.106794	0.138827	0.224134	0.238527	0.213853	0.144423	0.217488	0.236578	0.000440932	0.0260906	0.0934822	36	7	105114768	CAAGCCATGTTAAATCAGTCCTTAAATATAGTCCTGGGGTGATAAATTAT	F	PUS7	NM_019042	Body									105114768	105114891	NC_000007.13
cg23481184	0.65496	0.612347	0.618322	0.618307	0.606474	0.645967	0.677317	0.747683	0.723899	0.695407	0.750932	0.721856	0.000115005	0.0164237	0.093453	37	15	29793451	CGGTTATTGATCTGTAGTTTTTACTTTTGATGTGTTTCACTTCCACAGAA	R	FAM189A1	NM_015307	Body				TRUE					29793451	29793574	NC_000015.9
cg04332442	0.225127	0.209426	0.222168	0.193887	0.21959	0.192632	0.332114	0.323403	0.30698	0.286251	0.323343	0.251403	0.000234418	0.0206734	0.0934444	37	22	46770063	TTTCCACTCAGGAAACCAGGGTGTTTGGTGTAGAGTTCTCCAGCCACACG	F	CELSR1	NM_014246	Body	chr22:46770433-46770871	N_Shore				22:46769820-46770205	Unclassified_Cell_type_specific		46770063	46770186	NC_000022.10
cg22177840	0.70516	0.775065	0.780038	0.760077	0.758173	0.761657	0.818289	0.82294	0.858656	0.847717	0.883121	0.869808	0.000106844	0.0159931	0.0933934	37	3	90139296	AGAGAGCGAAGAGCTCCAAGTCTTATCCTGGATTTTCAGCTTCCCCTTCG	F							TRUE					90139296	90139419	NC_000003.11
cg08441850	0.417871	0.45861	0.519388	0.489663	0.52273	0.453219	0.574033	0.56466	0.599861	0.620911	0.534772	0.527446	0.0019777	0.0449782	0.093367	37	17	37956902	CGTGTGTGTCATCTTCCTAAGAGGCCTGAAAACATAGACAAAGATGGGAG	R	IKZF3;IKZF3;IKZF3;IKZF3;IKZF3;IKZF3	NM_183228;NM_183229;NM_012481;NM_183230;NM_183231;NM_183232	Body;Body;Body;Body;Body;Body				TRUE		17:37956751-37957184	Unclassified_Cell_type_specific		37956902	37957025	NC_000017.10
cg17722435	0.513628	0.569913	0.550941	0.631007	0.583948	0.586439	0.640471	0.692707	0.671487	0.715704	0.657263	0.617841	0.00153643	0.0408366	0.0932661	37	7	22604019	CGTGAGCAGCACTGTATAAGGTGTTTTCCATGTATCATCGTGATCTTCAC	F							TRUE		7:22603356-22604223	Unclassified		22604019	22604142	NC_000007.13
cg10695647	0.605075	0.538616	0.596744	0.581666	0.559069	0.609981	0.624377	0.654326	0.715365	0.65784	0.701925	0.696752	0.000540175	0.0278847	0.0932392	37	4	5020292	CGACGGAGAAGCAGGCAGAGGCCTGGGTTCTAGTCCCCAAAAGCCCTCCC	F	CYTL1	NM_018659	Body	chr4:5021003-5021329	N_Shore		TRUE		4:5020122-5020634	Unclassified_Cell_type_specific		5020292	5020415	NC_000004.11
cg15638882	0.128422	0.0705567	0.123025	0.0788012	0.0681972	0.108058	0.156242	0.175363	0.234362	0.146889	0.185717	0.237742	0.000937292	0.0340866	0.0932092	37	8	17212177	CTCTTGTTTGACAACTTATCTTATTTCTTCTCACAAATCCTTTGAGGTCG	F	MTMR7	NM_004686	Body				TRUE					17212177	17212300	NC_000008.10
cg19023258	0.518073	0.477866	0.462746	0.502488	0.494467	0.43742	0.556089	0.581612	0.530962	0.597031	0.589541	0.596608	0.000181134	0.0188786	0.0931307	37	19	21608124	CGTGTAGGCAGGGTTGAGAAGTGGTTAAAAGCTTTGTCACATTCTTCATA	R	ZNF493;ZNF493	NM_001076678;NM_175910	3'UTR;3'UTR									21608124	21608247	NC_000019.9
cg25012257	0.542435	0.485328	0.542155	0.519396	0.542342	0.559733	0.568368	0.624947	0.655813	0.6202	0.625517	0.655143	0.000288481	0.0224103	0.0930996	37	13	94792894	AGTTAAAGGAGCCACATTTCTGAATAAAATTGCTGAAGACAGTGCCTTCG	F	GPC6	NM_005708	Body				TRUE					94792894	94793017	NC_000013.10
cg27470433	0.81555	0.733943	0.811629	0.739211	0.723253	0.733804	0.884622	0.836949	0.839487	0.860316	0.852633	0.841373	0.0017946	0.0434036	0.0929985	37	12	2432681	CGCCTCCTATGTGGGTCTACTCTAATCCTATTCTGATGGCGACACTCACC	R	CACNA1C;CACNA1C;CACNA1C;CACNA1C;CACNA1C;CACNA1C;CACNA1C;CACNA1C;CACNA1C;CACNA1C;CACNA1C;CACNA1C;CACNA1C;CACNA1C;CACNA1C;CACNA1C;CACNA1C;CACNA1C;CACNA1C;CACNA1C;CACNA1C;CACNA1C;CACNA1C	NM_001129844;NM_001129827;NM_001129839;NM_001129834;NM_001129841;NM_000719;NM_001129830;NM_001167625;NM_001129843;NM_001167624;NM_001129835;NM_001129837;NM_001167623;NM_001129840;NM_199460;NM_001129833;NM_001129832;NM_001129829;NM_001129846;NM_001129836;N	Body;Body;Body;Body;Body;Body;Body;Body;Body;Body;Body;Body;Body;Body;Body;Body;Body;Body;Body;Body;Body;Body;Body				TRUE					2432681	2432804	NC_000012.11
cg24443446	0.708682	0.655886	0.671683	0.662461	0.707143	0.652722	0.716593	0.735585	0.775397	0.789134	0.777697	0.821085	0.000794005	0.0321641	0.0928193	37	10	65647572	CTGTACACTTGAAAGTAGGTAGATGTACTTGTCAGTACTCCCTACTTCCG	F												65647572	65647695	NC_000010.10
cg02351425	0.786054	0.699792	0.764145	0.754644	0.703469	0.794212	0.821989	0.83814	0.891478	0.819333	0.819807	0.867909	0.00137665	0.0393187	0.0927231	37	3	142735186	CAGTTATACTTTATAAACTTACCTTTAGCTGCATTAACAACACCCCCTCG	F	SR140	NM_001080415	Body						3:142735058-142735527	Unclassified_Cell_type_specific		142735186	142735309	NC_000003.11
cg11960655	0.705902	0.686496	0.69739	0.693143	0.640789	0.694608	0.751396	0.805161	0.799693	0.708203	0.806254	0.803124	0.00127956	0.0381791	0.0925839	37	8	129696418	CGTATGAGAGAACTGGATGCCAGAGAGATGAGGTACGCTTTCCACCACCA	R							TRUE					129696418	129696541	NC_000008.10
cg15057818	0.608789	0.614825	0.580534	0.573033	0.625027	0.592928	0.652853	0.701922	0.709195	0.650105	0.709283	0.727261	0.000283385	0.0222301	0.0925806	37	7	158087993	CGGCACCCGCTGACCCTGCCTGTCTGCCCAGACACTGAACCACATTGTGG	F	PTPRN2;PTPRN2;PTPRN2	NM_002847;NM_130842;NM_130843	Body;Body;Body					7:157780337-157780811				158087993	158088116	NC_000007.13
cg10433327	0.554724	0.515697	0.507897	0.513335	0.528338	0.574192	0.582427	0.585218	0.686781	0.593302	0.638506	0.66342	0.00223372	0.0472908	0.0925786	37	15	56209506	CGGCTGGAGAAAGTATAGGCACTGTGATTCACATAGTTAAATGTTCATTT	R	NEDD4;NEDD4	NM_198400;NM_006154	TSS200;Body									56209506	56209629	NC_000015.9
cg00355699	0.371233	0.343204	0.353931	0.344468	0.338646	0.353169	0.413789	0.469188	0.43885	0.473498	0.432793	0.431953	3.94e-05	0.0117288	0.0925701	37	13	104667830	CGAGGTTTGGCTGAGGAATGCCGTTGGTGAGGCTCATGCCTTCCCATACG	F							TRUE					104667830	104667953	NC_000013.10
cg14133064	0.419305	0.468797	0.46892	0.468519	0.405732	0.425116	0.546194	0.549969	0.504227	0.528844	0.512873	0.569043	0.000159444	0.0180985	0.0924603	37	9	5530115	CGTTGTGTGTTTCCTGAATAAGTGACAGGTGCTGACTACCATTGATGCTT	F	PDCD1LG2	NM_025239	Body				TRUE					5530115	5530238	NC_000009.11
cg05362011	0.563489	0.573811	0.523321	0.520468	0.521249	0.455713	0.574551	0.592072	0.659463	0.594596	0.655814	0.636142	0.00224355	0.0473619	0.0924314	37	13	21860987	CGCAGCCAAAGGAAGGGAAAATGTCATATTTGTTGAAATAGTCTCTAAGA	F												21860987	21861110	NC_000013.10
cg14395892	0.279816	0.354946	0.382391	0.340755	0.386257	0.332204	0.46056	0.417974	0.405077	0.434727	0.484058	0.428355	0.0011207	0.0363685	0.092397	37	9	79499202	CGAGCCCCCACCCGATTATGTTGTAAATTTCCTTAGCTCTAGGGTGGGGT	R	PRUNE2	NM_015225	Body				TRUE					79499202	79499325	NC_000009.11
cg22187376	0.746024	0.719176	0.66151	0.699682	0.730691	0.733766	0.817534	0.817287	0.801165	0.827006	0.771676	0.810483	0.000193544	0.0193594	0.0923838	37	11	111126172	CGGTGATTCAACATGAGGAGTTACTGCTTCAAAATAAGGCCGAGGATAAA	R	C11orf53	NM_198498	TSS1500									111126172	111126295	NC_000011.9
cg00602693	0.624827	0.635331	0.62924	0.59566	0.66512	0.656201	0.71133	0.686641	0.749205	0.705099	0.755181	0.752225	0.000167791	0.0184167	0.0922172	37	2	19114166	CGCACCCCAAGAGCTCCCAGGATCCTAATTAGTATGTATGCCCAGTCTCT	F							TRUE					19114166	19114289	NC_000002.11
cg19152255	0.530995	0.589319	0.594086	0.576968	0.577071	0.556979	0.609314	0.72883	0.62956	0.669793	0.697776	0.642904	0.00240015	0.0485951	0.0921266	37	20	52274268	TAGAATATAACACGAATATTACAGATTGTTAAGTCTCCAATTGTTCTACG	F				chr20:52276744-52277051	N_Shelf		TRUE		20:52274195-52274449	Unclassified_Cell_type_specific		52274268	52274391	NC_000020.10
cg13690461	0.155088	0.148164	0.194382	0.1732	0.125732	0.171743	0.251062	0.290879	0.25812	0.237312	0.216807	0.266771	7.06e-05	0.01383	0.0921071	37	11	57957575	TGGAGTGCTTTTAGCTTTCCAATGTGCTTTTGCCTCTGTTTTAACCTACG	R	OR9Q2	NM_001005283	TSS1500									57957575	57957698	NC_000011.9
cg03155159	0.546788	0.546094	0.560222	0.541963	0.538201	0.55766	0.595137	0.630307	0.64798	0.62168	0.648826	0.699178	0.00098169	0.0347034	0.0920298	37	16	59627519	CGTGGGTGGAAAGGCAAGAATTATGGCTTATAGAAGGCTGTAGCTATCAG	F							TRUE					59627519	59627642	NC_000016.9
cg19996313	0.746702	0.706648	0.668899	0.6755	0.714149	0.71853	0.811353	0.741533	0.838884	0.796417	0.783862	0.80985	0.000453512	0.026366	0.091912	37	6	12593831	CGATACAGGCATGCAATGTGACATAAGCACATCACAGAGAATGGGGTATC	F							TRUE					12593831	12593954	NC_000006.11
cg00689360	0.659975	0.661693	0.663379	0.652285	0.657156	0.65362	0.751419	0.715297	0.791411	0.725364	0.732101	0.783603	0.000749149	0.0314272	0.0918481	37	4	100273995	CGGGTGTGGCTTAAAAACCTAGATCACGTGTGTAGTTGGAATTGGGTGTT	R	ADH1C	NM_000669	TSS200				TRUE					100273995	100274118	NC_000004.11
cg11712188	0.325438	0.282708	0.2902	0.326926	0.268993	0.320643	0.41459	0.350511	0.413371	0.394501	0.403186	0.389704	6.63e-05	0.0135516	0.0918258	37	6	91093918	CAGGAGATAAAACAACTTCAATAGGCAGACTCCACAGGCCATAGTGCTCG	F							TRUE					91093918	91094041	NC_000006.11
cg27605208	0.754376	0.707893	0.766333	0.673316	0.676004	0.770676	0.823977	0.795291	0.850606	0.779125	0.820351	0.830096	0.00244429	0.0489418	0.0918081	37	3	169493411	CGTTCAGTGGGAAGTGAATAAGGATCAAGTAAAACCTTATTTAGCCTCAA	R	MYNN	NM_018657	Body	chr3:169490834-169491206	S_Shelf							169493411	169493534	NC_000003.11
cg03512692	0.67749	0.656399	0.637591	0.648297	0.650304	0.655109	0.77213	0.726914	0.770489	0.748865	0.709264	0.748269	5.19e-05	0.0124601	0.0917902	37	22	44350088	GGCAACCTCATGGCTTATCCTTTACAAGTGGCATACTCAGAAGAATAACG	R	SAMM50	NM_015380	TSS1500	chr22:44350902-44351662	N_Shore							44350088	44350211	NC_000022.10
cg17811323	0.519059	0.610022	0.544927	0.574225	0.509745	0.525199	0.635043	0.648016	0.576132	0.688239	0.643482	0.642888	0.00165622	0.0421	0.0917704	37	5	179004707	CGGGCCCAATCACACAGTCCAACCCGGATTTGCTCTTTCGGCTGAAACTC	R	RUFY1;RUFY1;RUFY1	NM_001040451;NM_001040452;NM_025158	Body;Body;Body	chr5:179004497-179004836	Island			5:178937104-178937417				179004707	179004830	NC_000005.9
cg19530700	0.162285	0.171659	0.19242	0.138113	0.146123	0.191072	0.260568	0.269623	0.299543	0.275978	0.184563	0.261888	0.00106114	0.0356606	0.0917484	37	14	88828954	AAAGATAAGTAATTAGCCCACACAATTGGTCTTTATGACTCTTGATTTCG	F							TRUE					88828954	88829077	NC_000014.8
cg12711832	0.706406	0.686033	0.696371	0.647236	0.734424	0.670081	0.793985	0.815917	0.78334	0.750848	0.790219	0.75511	0.000211737	0.0200106	0.0914782	37	8	68258899	CAGGATGGCTTGGTCAGGTCCAGGGCCACCAAGCAAGGTTGTGGAGATCG	R				chr8:68255129-68256274	S_Shelf							68258899	68259022	NC_000008.10
cg12862820	0.190143	0.187707	0.135794	0.190039	0.213055	0.189708	0.261637	0.242428	0.236387	0.296982	0.279384	0.338468	0.000943601	0.0341642	0.0914733	37	7	83817398	GCTGCAACGCTTTAAGTTACTCTAAGTTTTGGTCAACATAGTTTCCCACG	R	SEMA3A	NM_006080	Body				TRUE		7:83817353-83817528	Unclassified_Cell_type_specific		83817398	83817521	NC_000007.13
cg15118835	0.576998	0.548282	0.537236	0.539511	0.570362	0.55834	0.656074	0.671437	0.699118	0.624629	0.594122	0.633875	0.00093489	0.0340631	0.0914211	37	5	75469826	CGGAGCAATTTACAGCAATGAGGGATTTATACATGAAAAATGGACAAGGG	R	SV2C	NM_014979	Body	chr5:75469968-75470173	N_Shore							75469826	75469949	NC_000005.9
cg12142869	0.664682	0.652427	0.68259	0.640281	0.692162	0.709226	0.760235	0.746367	0.756826	0.743458	0.767036	0.814129	0.00011276	0.0162953	0.0911137	37	12	48597881	CGGTTACACACAATTGGGTGGAAAGGATCCAACCATCCCTGTGTGAAAAG	F	OR10AD1	NM_001004134	TSS1500									48597881	48598004	NC_000012.11
cg03044573	0.2104	0.148006	0.186852	0.123897	0.163273	0.184286	0.264964	0.256629	0.310847	0.201589	0.259464	0.269161	0.000782637	0.0319886	0.0909902	37	1	173835265	GTAAGTGAAACTGTATCCAAGTAAGCAGGTAACTGGGCAAACTTCCTACG	F	GAS5;SNORD78;SNORD44;SNORD80;SNORD79	NR_002578;NR_003944;NR_002750;NR_003940;NR_003939	Body;TSS1500;TSS200;TSS1500;TSS1500	chr1:173837172-173837917	N_Shore							173835265	173835388	NC_000001.10
cg07072405	0.125103	0.148712	0.146293	0.118838	0.100459	0.137687	0.235828	0.243908	0.251283	0.181794	0.164529	0.245609	0.000936062	0.034077	0.0909764	37	12	105839243	CGCCTATGTAGGCAATCAGAAATGCCCAGCAATGAGGAAATGCATTTGTT	R							TRUE					105839243	105839366	NC_000012.11
cg08387551	0.647758	0.6508	0.675247	0.692176	0.686328	0.646842	0.748841	0.718462	0.794351	0.716857	0.808428	0.757885	0.000971941	0.0345457	0.0909457	37	5	72417180	CGGAGACAAGAAAGAGAAGGGTGATTCTCGGCTGCAAAGTCCTATCAGGA	R	TMEM171;TMEM171	NM_173490;NM_001161342	5'UTR;5'UTR	chr5:72415611-72416766	S_Shore						TRUE	72417180	72417303	NC_000005.9
cg25190824	0.588969	0.589232	0.582036	0.606299	0.641183	0.576417	0.725056	0.709984	0.688425	0.628005	0.671767	0.706283	0.000536415	0.0278518	0.0908976	37	1	40255903	CGGTAAAAGACAGACTAGGCATGTGCTTAAGGAGCCAGCAAATGACCATT	R	BMP8B	NM_001720	TSS1500	chr1:40253683-40255172	S_Shore							40255903	40256026	NC_000001.10
cg23764766	0.59438	0.611908	0.610069	0.598917	0.676727	0.646441	0.699969	0.713901	0.745209	0.677124	0.719064	0.728159	0.000310647	0.0229663	0.0908305	37	12	1459744	CGGATTTATGGCAGTTTCCCAGTTAAAGGCCCATCCCATAGACCATGTGT	R	ERC1;ERC1;ERC1;ERC1;ERC1	NM_178039;NR_027948;NR_027949;NM_178040;NR_027946	Body;Body;Body;Body;Body				TRUE				TRUE	1459744	1459867	NC_000012.11
cg23103043	0.134928	0.10233	0.110772	0.0766664	0.111568	0.130873	0.198012	0.204112	0.255652	0.139815	0.196275	0.21819	0.000908392	0.0336943	0.09082	37	17	69646723	TATCCTTTCCAAGTTTTCCATTGCATCTAAGCAGGCTTGTACTAAACTCG	F							TRUE					69646723	69646846	NC_000017.10
cg27081346	0.580343	0.684682	0.624193	0.656922	0.629435	0.619365	0.725049	0.711454	0.750008	0.687713	0.709854	0.75496	0.000645188	0.0296843	0.090683	37	6	32064692	TGTAACCCCGGCTACACTGGCGAGGACTGTGGGGTGAGGAGCTGCCCTCG	F	TNXB	NM_019105	Body	chr6:32063533-32065044	Island			6:32171573-32172951	6:32064547-32065035	Unclassified_Cell_type_specific	TRUE	32064692	32064815	NC_000006.11
cg07230621	0.511377	0.51689	0.49899	0.485154	0.477436	0.511324	0.622136	0.596212	0.576565	0.555398	0.652321	0.542207	0.00201054	0.0453201	0.0906115	37	4	14891007	TAGCATGAAGGCCTTTCATAATCTGATCGTATCTTCCCTTTCTATGATCG	R												14891007	14891130	NC_000004.11
cg03320844	0.595445	0.530189	0.626787	0.579188	0.562769	0.621993	0.680425	0.641102	0.720464	0.643964	0.698071	0.67558	0.001016	0.0351483	0.0905391	37	6	121756839	CTGTCTATTTAAAGTTTAAAACTCCGCTGCTGTTTGGTACTTTCCTCACG	F	GJA1;GJA1	NM_000165;NM_000165	5'UTR;1stExon								TRUE	121756839	121756962	NC_000006.11
cg15020132	0.731019	0.695919	0.724339	0.690034	0.725455	0.740645	0.796064	0.774908	0.788125	0.78885	0.830112	0.872504	0.000771059	0.0317922	0.0905252	37	7	34122682	CGGTGTCTTGACAAGCATGAAACTCACAATGTCTTTGGCTTCACAGATTG	F	BMPER	NM_133468	Body	chr7:34118463-34118759	S_Shelf							34122682	34122805	NC_000007.13
cg00173799	0.693548	0.582055	0.687253	0.625564	0.661685	0.680702	0.779901	0.762303	0.735133	0.716828	0.764211	0.71531	0.002244	0.0473629	0.09048	37	11	101001711	CGGGCATCAAATGGCAGGATATAATATGGCAACTGCAAGGGGACCATTAT	F	PGR	NM_000926	TSS1500	chr11:100998030-100999774	S_Shore							101001711	101001834	NC_000011.9
cg01481116	0.525139	0.495274	0.491578	0.453021	0.442024	0.504174	0.59928	0.57232	0.555605	0.554761	0.543127	0.628964	0.000642064	0.0296417	0.0904744	37	11	93867992	TTATTTTCTCACAGCCTGGGAAGTTCAAGATCAAGGTACCAGCAGATTCG	F	PANX1	NM_015368	Body				TRUE					93867992	93868115	NC_000011.9
cg21222178	0.80139	0.77227	0.774708	0.798412	0.796836	0.819435	0.850275	0.868488	0.948317	0.907088	0.87963	0.852045	0.00103762	0.0353504	0.0904655	37	19	17759409	CGTGCACGACGCCACACAACTTCGAAGTGTGGACGGCCACCACGCCCACC	R	UNC13A	NM_001080421	Body	chr19:17759189-17759410	Island			19:17620176-17620591				17759409	17759532	NC_000019.9
cg21803927	0.161576	0.180771	0.185406	0.197296	0.218474	0.201793	0.257555	0.273121	0.315102	0.275551	0.284543	0.281996	1.05e-05	0.00778976	0.0904251	37	8	14412919	CGTCCCATGAGAACTCTATTACCAGAACAGCACCAAAGGGGGAAATTCAC	R	SGCZ	NM_139167	Body									14412919	14413042	NC_000008.10
ch.8.89733515F	0.124701	0.0845897	0.0925357	0.0711478	0.0577176	0.0897222	0.177124	0.204435	0.204151	0.111303	0.146099	0.219719	0.00170644	0.0425232	0.0904028	36	8	89664399	CAGTCATAAATGAGTTCTGACAAACTGTGACACAGGATCACTGCATATTT	F												89664399	89664522	NC_000008.10
cg14223966	0.543949	0.462554	0.487299	0.502808	0.513114	0.550502	0.605314	0.581024	0.562313	0.615987	0.623747	0.612985	0.000443955	0.0261494	0.0901906	37	9	74061323	AGGGTCTCCTGACGTCTCTGGCGGCTCTGCAAAAATTGAAAACATGTTCG	F				chr9:74061513-74062097	N_Shore	RDMR		9:73251051-73251850			TRUE	74061323	74061446	NC_000009.11
cg16554145	0.171489	0.0910523	0.123154	0.11537	0.123125	0.133804	0.183642	0.207394	0.271419	0.166992	0.258403	0.211036	0.00164036	0.0418889	0.0901488	37	1	241790950	CGTGCCTTACAGAAAGCTGGAAGTACTGTGCCCCCTGCTGTTGAAATGTG	F	OPN3	NM_014322	Body						1:241790821-241791506	Promoter_Associated_Cell_type_specific		241790950	241791073	NC_000001.10
cg13611432	0.616684	0.621739	0.599917	0.584626	0.576272	0.561646	0.71794	0.650706	0.69544	0.656841	0.660241	0.720593	0.000309488	0.022933	0.0901462	37	2	234958948	CGAAGCAAGTACAAGTGCAGTAAAAAGCTGGGACACACCATCCTATTAAC	R	SPP2	NM_006944	TSS1500									234958948	234959071	NC_000002.11
cg24491749	0.389317	0.381599	0.408273	0.442766	0.431959	0.378154	0.510248	0.452327	0.480704	0.481259	0.545772	0.502484	0.000391793	0.024996	0.0901209	37	4	107236485	CGAGTCGTTTAAAACTCTAAGTTCTTTGAGGGCACAGAGTCTGACTTGTT	R	AIMP1;TBCK;TBCK;AIMP1;AIMP1;TBCK;TBCK	NM_001142415;NM_033115;NM_001163436;NM_001142416;NM_004757;NM_001163437;NM_001163435	TSS1500;5'UTR;5'UTR;TSS1500;TSS1500;5'UTR;5'UTR									107236485	107236608	NC_000004.11
ch.12.679484R	0.101456	0.081546	0.0797454	0.0588409	0.0769379	0.085272	0.201439	0.152137	0.225272	0.118984	0.131622	0.19505	0.00258047	0.0499011	0.0901177	36	12	30831548	CAGTCATGTGTTACTTAACTTTGGGGATGCATTCTGAGAAAATGCATTGT	F	IPO8	NM_006390	Body									30831548	30831671	NC_000012.11
cg16149164	0.698641	0.679395	0.667935	0.641214	0.632535	0.653821	0.782477	0.732211	0.756262	0.755454	0.75126	0.735783	4.61e-05	0.0120964	0.0899839	37	14	105617308	CGGGCTGGAAGGGCATCAACTGCCATATCAGTCAGTATGGGGGGTGGGCG	F	JAG2;JAG2	NM_002226;NM_145159	Body;Body	chr14:105616987-105617309	Island			14:104688087-104689134	14:105617184-105617330	Unclassified_Cell_type_specific		105617308	105617431	NC_000014.8
cg16652937	0.59008	0.559667	0.596572	0.556138	0.552353	0.548296	0.648472	0.720959	0.609692	0.665845	0.671684	0.62618	0.00125722	0.0379336	0.0899546	37	3	23243625	CAAAGATAGAAGTTAATTTTGCTGCATCCCTGGACACCCCGTTGCCAACG	R	UBE2E2	NM_152653	TSS1500	chr3:23244050-23245071	N_Shore							23243625	23243748	NC_000003.11
cg03895880	0.570848	0.576737	0.594095	0.570384	0.575585	0.578114	0.67071	0.633088	0.716396	0.646144	0.632533	0.705815	0.00146004	0.0401359	0.0898207	37	12	21015340	GAAGACATAGATCCACATGTGTGACCCAGATTCCTTTACACAATCTATCG	F	SLCO1B3	NM_019844	Body									21015340	21015463	NC_000012.11
cg07858848	0.157667	0.139248	0.117816	0.0925213	0.0891172	0.131483	0.208849	0.212705	0.232677	0.147779	0.234078	0.230398	0.000465388	0.0266205	0.0897723	37	2	43087177	CGGTGAATGCTTTCATGACTTGTAGAGTTTATTTGGCCTGAGTTCTAGTC	R							TRUE					43087177	43087300	NC_000002.11
cg23844085	0.693263	0.769478	0.686805	0.720118	0.767226	0.785993	0.791022	0.841987	0.834734	0.833464	0.81608	0.843948	0.0022037	0.0469966	0.0897254	37	18	74063855	CTTACATTTACATATCGCATTAAAGTTGACAAAATGCAGCCCATATATCG	R				chr18:74062370-74062847	S_Shore						TRUE	74063855	74063978	NC_000018.9
cg09150559	0.526062	0.509767	0.505875	0.527508	0.490069	0.534996	0.610304	0.572594	0.664455	0.607535	0.560664	0.616126	0.000956169	0.0343513	0.0895666	37	5	140571517	CATCTGGGATCACCAAAGTAACAGGAGATTTTACTTTTCCAGAAACATCG	F	PCDHB10	NM_018930	TSS1500	chr5:140573423-140574316	N_Shore	RDMR						140571517	140571640	NC_000005.9
cg20143859	0.680292	0.610582	0.665985	0.652966	0.670972	0.708641	0.701304	0.758901	0.755776	0.7822	0.783586	0.745069	0.00059065	0.0287697	0.0895663	37	18	56806343	CGAGTGAGTGAATGAACCAAAGGTAATCTAGGATCAGAACTGTGATGATC	F	SEC11C	NM_033280	TSS1500	chr18:56806608-56807425	N_Shore				18:56806240-56808088	Promoter_Associated		56806343	56806466	NC_000018.9
cg01781374	0.630175	0.653144	0.64661	0.654597	0.682233	0.677017	0.742073	0.788633	0.765891	0.698902	0.762011	0.723334	0.000361492	0.0241585	0.0895115	37	5	110777659	CGGTGATTGTGAAGTAATGAGATTAGTGTTGATGATATTAGAAGTGTGTA	F	CAMK4	NM_001744	Body									110777659	110777782	NC_000005.9
cg08591388	0.59545	0.502965	0.5526	0.583742	0.577632	0.544791	0.668527	0.668304	0.63011	0.60596	0.66578	0.655538	0.000514375	0.0274363	0.0895063	37	4	44454053	CGGAGTAACTTGCTGAAATTGCAAAGCTAGTAAGAGACAAAGTTAGATTT	R				chr4:44449386-44451133	S_Shelf							44454053	44454176	NC_000004.11
cg05313588	0.755108	0.773035	0.732505	0.740297	0.699765	0.699706	0.830907	0.787491	0.848977	0.83787	0.820783	0.811086	0.000191715	0.0192981	0.0894495	37	10	134701730	GAGAACCATAGTGGGCACCAATGCGGGCTCCACCCCGTCTAATGGTAGCG	R				chr10:134698653-134698968	S_Shelf							134701730	134701853	NC_000010.10
cg06178322	0.218098	0.174861	0.185269	0.202543	0.234605	0.169315	0.253456	0.343439	0.252562	0.279282	0.263245	0.32939	0.00142284	0.039847	0.0894474	37	1	16010345	GGGTCTCCAGGGTCTCTGAGGAGGGCCGGTGTCCCGGGCAGGCGGGGTCG	R	PLEKHM2	NM_015164	TSS1500	chr1:16011266-16011502	N_Shore						TRUE	16010345	16010468	NC_000001.10
cg16057587	0.67455	0.678845	0.704712	0.67692	0.671892	0.724495	0.796143	0.746518	0.796515	0.745571	0.792986	0.789599	5.99e-05	0.0130787	0.0893196	37	7	136698566	AACCCATGTCTGCCACCAGGCAGAGACCTTGTTTTAATCATCATTGAACG	R	CHRM2;CHRM2;CHRM2;CHRM2;CHRM2;CHRM2;CHRM2;CHRM2	NM_001006631;NM_000739;NM_001006627;NM_001006628;NM_001006629;NM_001006632;NM_001006630;NM_001006626	5'UTR;5'UTR;5'UTR;5'UTR;5'UTR;5'UTR;5'UTR;5'UTR									136698566	136698689	NC_000007.13
cg19750824	0.473204	0.483293	0.436661	0.463712	0.419283	0.455424	0.576511	0.511905	0.577463	0.55485	0.471899	0.574723	0.00243908	0.048904	0.0892956	37	1	178659932	CGACCATCACAGAGCCTGTGAAAGAAGATATATGGTGAGCCAGCCGCTGT	R							TRUE					178659932	178660055	NC_000001.10
cg00510718	0.129749	0.0693571	0.145503	0.101374	0.0787933	0.114891	0.18728	0.195535	0.246284	0.136227	0.182411	0.227465	0.00129476	0.0383733	0.0892557	37	7	106505961	TCGGAATAGTGGCACTTCCTTCTCGGCTAGATTATCTGAAACTGTTGTCG	R	PIK3CG;PIK3CG	NM_002649;NM_002649	5'UTR;1stExon	chr7:106508057-106508733	N_Shelf				7:106505080-106506285	Promoter_Associated		106505961	106506084	NC_000007.13
cg06568464	0.537094	0.553225	0.566571	0.546247	0.531739	0.578727	0.601746	0.602917	0.713195	0.628309	0.644956	0.657989	0.00208706	0.0459435	0.0892514	37	5	140519842	CAGTCTCCTTCATTGCAACAAGTCAATAAACCCAACTTTGTTCTGATTCG	F				chr5:140516311-140517300	S_Shelf							140519842	140519965	NC_000005.9
cg02473439	0.799463	0.782666	0.82021	0.76608	0.786605	0.802672	0.851608	0.879377	0.867866	0.901585	0.903326	0.88917	1.27e-05	0.00827199	0.0892061	37	10	70515244	CGTTGTTGTAAGGCTCTGACAGGCATTGATCTAAGTGTGTGCACACAATG	F	CCAR1	NM_018237	Body									70515244	70515367	NC_000010.10
cg14294721	0.639824	0.639693	0.682057	0.602135	0.580552	0.597082	0.734123	0.669143	0.714765	0.664316	0.740979	0.753212	0.00209583	0.0459967	0.0891988	37	8	131138248	CGCATTCAGTCTTTGGAACTAGACAAATTAGGAACTTCTGAACTCTTGGT	R	ASAP1	NM_018482	Body				TRUE					131138248	131138371	NC_000008.10
cg14563732	0.651209	0.618128	0.690298	0.655878	0.671006	0.691388	0.739353	0.72438	0.791218	0.716456	0.763708	0.777585	0.000332475	0.0235304	0.0891321	37	8	143474839	CGGGGAAAACTGGGTGAAGAGTGCACAGGATCTGTGTATTATTTCTCACA	F	TSNARE1	NM_145003	5'UTR	chr8:143471631-143472231	S_Shelf			8:143472504-143472747				143474839	143474962	NC_000008.10
cg20836156	0.662021	0.630474	0.633418	0.628144	0.68712	0.690089	0.787056	0.739654	0.745674	0.722086	0.67672	0.794359	0.00253091	0.0495908	0.0890471	37	12	25361667	CGGTCATCCAGTGTTGTCATGCATTGGTTAGTCAAAATGGGGAGGGACTA	R	KRAS;KRAS	NM_004985;NM_033360	3'UTR;3'UTR									25361667	25361790	NC_000012.11
ch.2.78120589R	0.110905	0.0665769	0.10743	0.0643099	0.0706126	0.0983506	0.166174	0.187764	0.212862	0.105435	0.168339	0.211835	0.00147078	0.0402221	0.0890372	36	2	78267081	CAGTCTCAGTAGTTCAGTATGAGGTTCTAGTGAGGATGATGAAGACTTCT	F												78267081	78267204	NC_000002.11
cg22223402	0.643435	0.62236	0.679025	0.665959	0.664095	0.717892	0.701313	0.78211	0.772713	0.753867	0.728641	0.787961	0.000913677	0.0337486	0.0889732	37	11	114467115	ATGATGGGCATGCCCTCCTGTGTAGGGCAGCAGTAATCAACCCATGGACG	F	FAM55D;FAM55D	NM_001077639;NM_017678	TSS1500;TSS1500									114467115	114467238	NC_000011.9
cg12735966	0.140109	0.0877712	0.123072	0.0634497	0.095302	0.0973436	0.204766	0.222795	0.18284	0.121307	0.17587	0.232329	0.00160233	0.0415007	0.0888098	37	7	145396445	CGACCTTTGATTGGGGGCAATCAACTTATTGTGGTGCAAAAGTCATCGCG	F						CDMR						145396445	145396568	NC_000007.13
cg08914356	0.561821	0.562784	0.596327	0.596217	0.518311	0.603561	0.695102	0.622556	0.657727	0.638217	0.711186	0.646931	0.000971257	0.0345407	0.0887831	37	6	150293190	AGGTAGGGTCTTCCTATGTTGCCCAGGATGGTCTTCAAATCTTGGTCTCG	R	ULBP1	NM_025218	3'UTR									150293190	150293313	NC_000006.11
cg16737749	0.533507	0.56904	0.571753	0.569833	0.543389	0.555962	0.636494	0.610845	0.654055	0.653441	0.677662	0.643567	2.17e-05	0.00968056	0.0887634	37	4	87308061	CTACTCAGCCTCTCTACCACAGTCTTGAGGCATATGATGTTCCACATTCG	F	MAPK10	NM_002753	5'UTR				TRUE					87308061	87308184	NC_000004.11
cg16465407	0.720719	0.640764	0.721277	0.680174	0.720947	0.669515	0.754326	0.822239	0.766665	0.732987	0.809072	0.800421	0.00122063	0.0374926	0.088719	37	7	9673790	CGGAAAAGTGTAGTGGAGACTCAACAATTTAGAATGAGGAGTTATAGGAA	F	PER4	NR_002790	TSS200									9673790	9673913	NC_000007.13
ch.3.3016567F	0.15054	0.156485	0.152643	0.117444	0.127711	0.0951277	0.212242	0.226918	0.219809	0.178183	0.251625	0.243328	0.000116678	0.0165165	0.0886924	36	3	152871396	CAGTCATATTGGTTGAAATATACTATGTGAGTGATCATTTTACTATAACT	F												152871396	152871519	NC_000003.11
cg17197065	0.429	0.478409	0.487456	0.463767	0.44949	0.488972	0.569373	0.56075	0.542015	0.503628	0.55152	0.601908	0.00040319	0.0252142	0.0886833	37	4	80327523	CGTTAGAAGAGCACTGTAGAAATATTGGGTGTGTTTTTTTTAACATCGAC	R	GK2;GK2	NM_033214;NM_033214	1stExon;3'UTR									80327523	80327646	NC_000004.11
cg03985452	0.489897	0.529994	0.466649	0.484392	0.512886	0.477979	0.552835	0.550201	0.621898	0.604503	0.599944	0.564387	0.000261109	0.0215663	0.0886617	37	2	3836042	ATCTTCTTATACACGTTGCACCTGGAACTTGTCACTACGGCATCCTGTCG	F				chr2:3833815-3834318	S_Shore							3836042	3836165	NC_000002.11
cg08141722	0.578517	0.582594	0.589403	0.597182	0.514966	0.560263	0.662895	0.647548	0.608495	0.672181	0.656427	0.706779	0.000593013	0.0288247	0.0885667	37	11	74802047	CGGGGTGAGGAGATAAGGATCAACCAGACTATCAGCCCACAACTCAGGAG	F	OR2AT4	NM_001005285	TSS1500									74802047	74802170	NC_000011.9
cg10076958	0.303053	0.223171	0.298751	0.251151	0.273937	0.286798	0.325451	0.39321	0.385248	0.392652	0.300029	0.371655	0.00165098	0.0420427	0.0885637	37	10	125299245	CGAGCTAGCACTTTAAAATGAGAGTTGTGGGGCTGGCAAAGGTGCAGAGA	F							TRUE					125299245	125299368	NC_000010.10
cg25517103	0.164389	0.170934	0.179447	0.152439	0.163369	0.160442	0.316713	0.225754	0.287003	0.235208	0.224305	0.2333	0.00201251	0.0453379	0.0885438	37	2	198506530	CGGGTATGAACAAGAGCCATAGATGAATTGCCAAATATTATTTTTGAGCG	R	RFTN2	NM_144629	Body				TRUE					198506530	198506653	NC_000002.11
cg08885854	0.75113	0.66765	0.738343	0.669659	0.698895	0.751857	0.79968	0.791287	0.779675	0.802538	0.819964	0.815438	0.00172647	0.0427692	0.0885079	37	1	171909155	CGCAGAGAAGGACAGGTTATTTCATTTATTGCTGAATGATATGATCAGTG	F	DNM3;DNM3	NM_015569;NM_001136127	Body;Body				TRUE					171909155	171909278	NC_000001.10
cg17684765	0.732047	0.693149	0.692306	0.70872	0.692567	0.737656	0.786264	0.77829	0.853008	0.767389	0.786469	0.815986	0.000318234	0.0231653	0.0884934	37	2	3833816	CGAGAGGCCCTGTGCACAAGCGGGACACATCTGCATGGGAGGCTCAGTGC	R				chr2:3833815-3834318	Island		TRUE	2:3811640-3812193				3833816	3833939	NC_000002.11
ch.3.97157383F	0.0722782	0.0435012	0.0661101	0.0404421	0.0491387	0.0622527	0.0959982	0.177098	0.209836	0.131891	0.119217	0.130141	0.00259303	0.0499993	0.0884096	36	3	95674693	CAGGAATAGATGTTTTGAAAAGATGAGATGGGAAGAAAAAGTCTGTAGCC	F												95674693	95674816	NC_000003.11
cg07867325	0.579907	0.504678	0.526328	0.51207	0.504699	0.573783	0.643355	0.627018	0.572279	0.633333	0.595933	0.659774	0.00101215	0.0351467	0.0883708	37	3	73159953	CGGCGTTCCCGGGCTTTCATTTCGAGTTTGCATGCCCCGTGCTTTCCCAC	R				chr3:73159857-73160140	Island			3:73242521-73242830	3:73159789-73160177	NonGene_Associated		73159953	73160076	NC_000003.11
cg06697455	0.0885108	0.0678836	0.084989	0.0599714	0.0696043	0.0570655	0.160309	0.154577	0.214368	0.0899668	0.155038	0.183624	0.00245112	0.0489897	0.0883096	37	5	27039965	CGTGGTGATTGAACATGGAGTGAATGGCTTTTAAATACTTCTGTGTTTGA	F	CDH9	NM_016279	TSS1500				TRUE					27039965	27040088	NC_000005.9
cg26207995	0.678727	0.620278	0.672871	0.666459	0.627268	0.624169	0.754126	0.704838	0.714702	0.728743	0.797032	0.719547	0.00065623	0.0298158	0.0882028	37	17	58045920	CACAAATTTTTCACACCTACCAATGTCCATATGCTTGGGTAGTCTCCTCG	R				chr17:58041846-58042463	S_Shelf							58045920	58046043	NC_000017.10
cg03020635	0.442787	0.442995	0.464037	0.478626	0.475908	0.461096	0.482681	0.550477	0.570106	0.541398	0.572775	0.57698	0.000885163	0.0333992	0.0881612	37	14	82526476	AGTTTAGTGAAGTGTAGCACACCTCCTCAGGGGTTGCACTTTGTACCTCG	R							TRUE					82526476	82526599	NC_000014.8
cg02737575	0.60449	0.564778	0.576859	0.572837	0.5406	0.554657	0.707324	0.64709	0.630153	0.63353	0.688365	0.636667	0.000416577	0.0255431	0.0881512	37	10	38295991	CGGCTATTCATTTTTATTGTGAATTTGATTAACTCTGTCTGATTTTTTGC	R				chr10:38299490-38300099	N_Shelf							38295991	38296114	NC_000010.10
cg22718077	0.534622	0.597695	0.548742	0.623464	0.604262	0.59835	0.634428	0.70327	0.68067	0.63054	0.708834	0.678269	0.00118526	0.0371171	0.088146	37	7	57712819	TTCTCTCTGTGTCTCTCAGTCTCTGTGTGTCTCTTTCACTCTCCCTGTCG	F								7:57716598-57716762				57712819	57712942	NC_000007.13
cg20953052	0.667216	0.66449	0.698568	0.671379	0.677199	0.617741	0.739437	0.733929	0.767872	0.712202	0.790477	0.78114	0.000349094	0.0238402	0.0880771	37	2	213292541	CGTGAGTGCATTAGCAGCAGGCCAATGCTTGCTTAGTGAAATGGGAACAA	F	MIR548F2;ERBB4;ERBB4	NR_031643;NM_005235;NM_001042599	TSS1500;Body;Body				TRUE					213292541	213292664	NC_000002.11
cg04299200	0.44752	0.461203	0.44197	0.50022	0.429517	0.463177	0.5656	0.542484	0.538764	0.554211	0.551938	0.519013	5.3e-05	0.0125269	0.088067	37	5	534332	GACAGGGAAGGCCGCGGCTCAGCGTCAGGTGCAGACACTCCGTGAAGTCG	F				chr5:535484-535814	N_Shore			5:587057-587440			TRUE	534332	534455	NC_000005.9
cg25288455	0.691039	0.647375	0.725052	0.662295	0.709222	0.716649	0.807884	0.768025	0.815709	0.730818	0.797943	0.759214	0.000770408	0.031782	0.0879932	37	17	78700906	GGAGCAGGAAGTGGTCAGAGGTGCAGCGTCCATGTTCTCGGAGCGTGACG	F	RPTOR;RPTOR	NM_001163034;NM_020761	Body;Body	chr17:78700827-78701124	Island			17:76315383-76315875				78700906	78701029	NC_000017.10
cg05572621	0.164268	0.189847	0.244066	0.163014	0.219424	0.16244	0.311628	0.283667	0.310487	0.268281	0.230352	0.266358	0.000916223	0.0337887	0.0879525	37	21	31972533	TTACTATATACCCAGAATCAACGAAGTCAAAAATCAAAGTCTTTGCCACG	R	KRTAP6-2;KRTAP22-1	NM_181604;NM_181620	TSS1500;TSS1500									31972533	31972656	NC_000021.8
cg18376306	0.636874	0.647654	0.631649	0.651325	0.662864	0.690944	0.771789	0.763968	0.766954	0.662652	0.744097	0.739558	0.00183507	0.0437822	0.0879513	37	1	76254508	CGGAAAGAAATACTCTCCCTGAACTTCACTGATGAAAAAGGTAGATGTTT	F	RABGGTB;SNORD45B	NM_004582;NR_002748	Body;TSS1500									76254508	76254631	NC_000001.10
cg19694453	0.706958	0.636043	0.726711	0.667033	0.68672	0.746845	0.779426	0.835939	0.749949	0.776845	0.776828	0.778897	0.00182889	0.0437448	0.0879286	37	13	70747673	CGATGATGCTGTCAGAACAGTTAATAAACACAAAAGGAATGAGTTCTTTC	R							TRUE					70747673	70747796	NC_000013.10
cg22596016	0.149922	0.110264	0.0957751	0.0880965	0.0816825	0.103826	0.233539	0.173481	0.218699	0.120733	0.22717	0.183385	0.00242816	0.0488027	0.0879068	37	17	61711557	GTGTGAGTTCTCCCTTGCTATAACTCATTTGTATTCAAAGCCACTTTTCG	R	MAP3K3;MAP3K3	NM_002401;NM_203351	Body;Body				TRUE					61711557	61711680	NC_000017.10
cg17164016	0.292533	0.352221	0.345733	0.384313	0.36561	0.33899	0.358269	0.421671	0.456003	0.45926	0.471214	0.440248	0.00219641	0.046939	0.0878778	37	8	110990365	CGACAGTCTAAAGGCTTTGGGTATATTCCCTAGTCATCAGATGTTATATT	F				chr8:110986113-110986983	S_Shelf				8:110990201-110990378	Unclassified_Cell_type_specific		110990365	110990488	NC_000008.10
cg11640208	0.440708	0.409156	0.395146	0.386032	0.347315	0.392845	0.485282	0.514056	0.501852	0.45032	0.499591	0.447205	0.000416296	0.0255386	0.0878508	37	17	42857157	CCTCCCTCCGTGGCTGGATGGGGGCAGCCTCGTGGTTCAGGGCCGAGACG	F	ADAM11	NM_002390	3'UTR	chr17:42856596-42856847	S_Shore				17:42856123-42857253	Unclassified		42857157	42857280	NC_000017.10
cg15237829	0.132617	0.102008	0.0968024	0.0705807	0.0842969	0.10723	0.164628	0.177706	0.207557	0.145654	0.198359	0.226195	0.000222141	0.0202982	0.0877605	37	3	171102373	CGGGGAGTCTAATACATAAAGACTCTCACTAAATGAGGAAATGACTACAC	F	TNIK;TNIK;TNIK;TNIK;TNIK;TNIK;TNIK;TNIK;TNIK	NM_001161563;NM_001161566;NM_001161560;NR_027767;NM_001161565;NM_001161561;NM_015028;NM_001161562;NM_001161564	Body;Body;Body;Body;Body;Body;Body;Body;Body				TRUE					171102373	171102496	NC_000003.11
cg08889347	0.71841	0.592187	0.683775	0.650072	0.641699	0.640041	0.731181	0.744665	0.750292	0.708826	0.780541	0.737214	0.00249476	0.0492983	0.0877559	37	3	193227429	CGGTAAAAAGCACTACAGCGGTCACAAATGAAAACACAGAGCTAATGCAG	F	ATP13A4	NM_032279	Body									193227429	193227552	NC_000003.11
ch.15.1160351F	0.121533	0.0869317	0.101892	0.076318	0.0835972	0.127669	0.224332	0.179391	0.204082	0.132154	0.19001	0.19416	0.000308382	0.022908	0.0876978	36	15	73420203	CAGGCCACATTTCAGGTAGCCACATGTGACTAGTGGCTATTGACTTGGAC	F	NEO1	NM_002499	Body									73420203	73420326	NC_000015.9
cg13079429	0.75671	0.733681	0.769521	0.704725	0.745194	0.770001	0.843538	0.798066	0.837407	0.819341	0.842632	0.86479	8.67e-05	0.0148755	0.087657	37	11	28781311	CGAAGTCATGGTGGGTTTTTAGACTAAACATTATCATTCAATAGCTGTGA	F							TRUE					28781311	28781434	NC_000011.9
cg22380849	0.675006	0.695945	0.664779	0.617533	0.645609	0.679425	0.758389	0.737143	0.711252	0.761507	0.738502	0.797418	0.000336327	0.0236069	0.0876522	37	19	11437532	CGGGGGGATCGCTTTAGGCCAGCAGTTCAAGACCAGCCTGCGCAACATAG	R	TSPAN16;RAB3D	NM_012466;NM_004283	3'UTR;Body									11437532	11437655	NC_000019.9
cg10378083	0.523913	0.50639	0.577157	0.599152	0.581023	0.551254	0.61037	0.645277	0.673512	0.665241	0.627255	0.643102	0.000838369	0.0327982	0.0876445	37	13	46343184	TTCTCTCTTCACCATTTGCAGGTGAAAAATCCTATTTTCTGCTAGTGACG	F							TRUE					46343184	46343307	NC_000013.10
cg24766398	0.21266	0.175838	0.173704	0.194365	0.21164	0.194339	0.23534	0.258085	0.326446	0.248641	0.308624	0.310972	0.00147566	0.0402434	0.0875939	37	6	25830852	ACTGGGTAGTGTTTGGTCAGTTGCCTCTCTACATTATGCTGACATCAACG	F	SLC17A1	NM_005074	5'UTR									25830852	25830975	NC_000006.11
cg14153356	0.279257	0.281701	0.33472	0.249629	0.220931	0.270461	0.390913	0.362195	0.35237	0.36452	0.385301	0.306933	0.00142676	0.0398651	0.0875889	37	6	10062223	CGTAGGCTTTGAATGTAAGGTTAGTTTTTACATCAGAATAAGTTGATGAT	R												10062223	10062346	NC_000006.11
cg01930395	0.747478	0.77532	0.716638	0.713746	0.683811	0.713414	0.833898	0.823802	0.820478	0.789255	0.785908	0.821996	0.00037704	0.0245792	0.0874883	37	2	110521111	CGAGGTTTTGTTTTGTAATTAATTTCGGAGCTGTCCTTATAAGCTGAGAG	R				chr2:110518071-110518913	S_Shelf							110521111	110521234	NC_000002.11
cg14343210	0.448477	0.450686	0.524632	0.453142	0.501404	0.546116	0.590511	0.541862	0.571961	0.608309	0.547618	0.588942	0.00244249	0.0489259	0.0874577	37	4	114328366	CGTCTCTGCAGGGCACATCAAATGTGCCAAAACAAATAGTGACAATAAGT	R							TRUE					114328366	114328489	NC_000004.11
cg26753307	0.249584	0.193939	0.226955	0.150477	0.190477	0.184281	0.277381	0.312557	0.29411	0.268386	0.290042	0.277935	0.000804259	0.0322975	0.0874498	37	17	45729462	ATCTGCTTTTTTCATTGTTCCCTTTTTGCTGAGTGCCCACAAATAAAACG	R	KPNB1	NM_002265	Body	chr17:45726673-45728222	S_Shore							45729462	45729585	NC_000017.10
cg19729536	0.328586	0.35252	0.360899	0.351765	0.367246	0.376932	0.405185	0.430183	0.443666	0.469059	0.484299	0.430051	0.000200885	0.0196479	0.0874156	37	3	60288717	AATTTTCAACTTTTATTGAAAGCTTTGTTAATAAGTTTCTCCCCTGTTCG	R	FHIT;FHIT	NM_001166243;NM_002012	Body;Body				TRUE					60288717	60288840	NC_000003.11
cg21170583	0.556689	0.51723	0.591621	0.52085	0.554702	0.575288	0.607698	0.652768	0.609905	0.612986	0.658266	0.69912	0.00115814	0.0367841	0.0873938	37	5	125374670	TGGCCACCACTAGCAGTAAACTTTCAGAGTATCATCACTGAATGTTAACG	R							TRUE					125374670	125374793	NC_000005.9
cg10941174	0.591523	0.574538	0.622243	0.559329	0.54572	0.61898	0.67706	0.6203	0.673044	0.67703	0.677126	0.71182	0.000559696	0.0282422	0.0873413	37	7	146842348	CGGTGGTTCTCAGCTAGGAGTGATTTTGACCCCCAGGGGATATTTGGCAA	F	CNTNAP2	NM_014141	Body				TRUE					146842348	146842471	NC_000007.13
cg01110440	0.555057	0.542039	0.529357	0.536602	0.606585	0.542078	0.609789	0.678075	0.664851	0.590626	0.610255	0.681943	0.00183444	0.0437802	0.0873037	37	6	110707714	TAGGGCTGGATCAGAACCAAGGTCATTCTCGTTGCTTCCCCAGCAGTACG	R							TRUE					110707714	110707837	NC_000006.11
cg27110521	0.713852	0.670405	0.709054	0.729245	0.702621	0.711482	0.847346	0.766965	0.777688	0.78976	0.772174	0.805783	0.000248306	0.0210642	0.0871761	37	14	50570216	CGGTTCTTTGCTAAACCTGAGACCAGATGGGTAGCAGGCCATTAAAGTAC	R							TRUE					50570216	50570339	NC_000014.8
cg09260048	0.376375	0.382866	0.400116	0.440345	0.381771	0.406232	0.437835	0.462125	0.471123	0.487016	0.563415	0.489043	0.00250979	0.0493912	0.0871421	37	15	82415405	CGCTTACTGAGGGAAAAGTCTGAGTAGTCTGGACAAGTTATAAAGCAGGA	R							TRUE				TRUE	82415405	82415528	NC_000015.9
cg05206587	0.624549	0.575468	0.592251	0.579507	0.621185	0.579347	0.651043	0.682806	0.682524	0.655103	0.716136	0.707016	0.000114918	0.0164237	0.0870533	37	X	14547880	AATCCCCCAGCTGCTTTTCCTGAATAATAAAAATGCTGCTACCTTAATCG	F	GLRA2;GLRA2;GLRA2;GLRA2;GLRA2	NM_001118885;NM_002063;NM_002063;NM_001118886;NM_001118886	5'UTR;1stExon;5'UTR;1stExon;5'UTR									14547880	14548003	NC_000023.10
cg14155327	0.543269	0.531343	0.544633	0.519433	0.516761	0.593548	0.635098	0.598215	0.670643	0.602751	0.635546	0.628991	0.00024706	0.0210313	0.0870427	37	4	87235054	CGTTCTTGCACTTGACTTTCAGTGAACATATGTACTTGTGTATGCATCTG	R	MAPK10;MAPK10;MAPK10	NM_138980;NM_138982;NM_002753	5'UTR;5'UTR;5'UTR									87235054	87235177	NC_000004.11
cg02335533	0.654986	0.685537	0.687589	0.69854	0.64912	0.687377	0.76424	0.750949	0.763252	0.753346	0.810138	0.742938	5.33e-05	0.0125503	0.0869522	37	12	28124870	CGAGGTTCAAAGGTTGACATTTCTGAGTGCTGATACTTTGTCCTTTCATA	R	PTHLH;PTHLH;PTHLH;PTHLH	NM_002820;NM_002820;NM_198965;NM_198965	1stExon;5'UTR;1stExon;5'UTR	chr12:28123023-28123773	S_Shore	RDMR						28124870	28124993	NC_000012.11
cg16190510	0.658571	0.707658	0.767038	0.716322	0.71326	0.761324	0.816412	0.81038	0.830486	0.814672	0.796031	0.777552	0.00180164	0.0434763	0.0868934	37	12	40197081	CGGTTTTATCTGTGGCAATCCTGTGCAGCCTCTGTTGAGAGCTTGTCCTT	R	SLC2A13	NM_052885	Body									40197081	40197204	NC_000012.11
cg22829451	0.704752	0.663232	0.725369	0.718793	0.76488	0.739856	0.789092	0.778071	0.822922	0.822695	0.834757	0.790581	0.000665009	0.0299712	0.0868725	37	X	70151816	CGGGAGGCAGGCATTGAAGTCCAACAGGCCAGGTTTTATCAAAGGTGGTC	R	SLC7A3;SLC7A3	NM_032803;NM_001048164	TSS1500;TSS1500	chrX:70150675-70151002	S_Shore							70151816	70151939	NC_000023.10
cg07344338	0.744038	0.693104	0.747822	0.718957	0.757919	0.751969	0.815029	0.805765	0.846051	0.798795	0.851985	0.817017	7.88e-05	0.0143748	0.0868053	37	3	25101907	CGTGGATGGTATAGAGCAGAGGGTTGCAAACTATAAGGGGCCAGATAGTG	F							TRUE					25101907	25102030	NC_000003.11
cg02928935	0.666847	0.720235	0.688691	0.700849	0.749738	0.708278	0.780405	0.796775	0.832275	0.777996	0.793969	0.773631	0.000176586	0.0187889	0.0867357	37	17	17188379	CGTCTCTTTCAGTCATTTGTTTTTGAGAGGAAAGAGAAGGGTGGAATTTA	R				chr17:17183886-17184699	S_Shelf							17188379	17188502	NC_000017.10
cg23828301	0.590774	0.541043	0.564463	0.543968	0.565543	0.581132	0.647696	0.603065	0.653632	0.625709	0.687236	0.689809	0.000635533	0.0295214	0.0867043	37	3	3123308	CGGTACTGTTATCAAAACTTGCCATATCAGGCTAGGGGATATTGCACAAG	R	IL5RA;IL5RA	NM_000564;NM_175726	Body;Body				TRUE					3123308	3123431	NC_000003.11
cg19823847	0.760705	0.747757	0.748236	0.724339	0.757433	0.798206	0.808915	0.846994	0.895222	0.792734	0.87637	0.836484	0.00150469	0.0405345	0.0866738	37	6	138539706	CGAGGTAGAGTTTTATGATTTGATTATTCCAGAAGAGCTCTGTAATTATT	F	KIAA1244;PBOV1	NM_020340;NM_021635	Body;TSS200									138539706	138539829	NC_000006.11
cg20417424	0.589517	0.576484	0.613675	0.618954	0.577442	0.648667	0.694095	0.656382	0.754493	0.692557	0.669971	0.675891	0.000852761	0.0329974	0.0864417	37	1	77331940	CGTGTTTGGGAGAGGGCAAGAAAGCACACGATTTAGCCTTTCAAGGAAAA	R	ST6GALNAC5	NM_030965	TSS1500	chr1:77333111-77334534	N_Shore							77331940	77332063	NC_000001.10
cg01849093	0.6216	0.60338	0.619786	0.637678	0.631728	0.611472	0.696018	0.661856	0.712941	0.73551	0.719099	0.718285	0.000121142	0.0166701	0.0863443	37	11	110876141	CGGACAGGTCTTGTGGTGTTATATGTGGGGCAGAGTTAAATACAAAACAG	R							TRUE		11:110876103-110876261	Unclassified_Cell_type_specific		110876141	110876264	NC_000011.9
cg09086615	0.560535	0.571247	0.545902	0.509133	0.53772	0.560934	0.643088	0.643615	0.62265	0.601698	0.663318	0.629126	4.32e-05	0.0119333	0.0863374	37	4	127966639	ACAGAATGCTCCACAGGATGCTTGGTACCCTGCTGTTAGTACAGTAACCG	F							TRUE					127966639	127966762	NC_000004.11
cg27528091	0.114882	0.0858125	0.0833222	0.0914414	0.104533	0.105423	0.153913	0.198205	0.252578	0.143704	0.168235	0.186723	0.00213066	0.0463072	0.0863241	37	6	27447518	CGGGGAGGAGGCTTAAACTTTTTTTTAGAAAAGCACACTTCCGGTAAACA	F								6:27555425-27555498	6:27446282-27448028	Promoter_Associated	TRUE	27447518	27447641	NC_000006.11
cg17837330	0.22769	0.189614	0.160818	0.199418	0.196831	0.218564	0.310668	0.290427	0.271957	0.225178	0.329919	0.282546	0.000935359	0.0340701	0.0862931	37	8	130738823	CGGATATACGAATAAAGTTTGTTTTAATTACCTCCAAGGTATTCCTGGTA	F							TRUE		8:130738228-130739177	Unclassified	TRUE	130738823	130738946	NC_000008.10
cg18866183	0.493336	0.477824	0.461354	0.446115	0.397868	0.498244	0.499499	0.605815	0.568914	0.526076	0.537126	0.554957	0.00236489	0.0483052	0.0862744	37	15	80397886	ACTTAAATAAGCCACCCAATTCTGAACTGAGCTTTATATTGCAACTTACG	R	ZFAND6	NM_019006	5'UTR				TRUE					80397886	80398009	NC_000015.9
cg11082691	0.171834	0.117216	0.145594	0.140018	0.154867	0.212732	0.262644	0.207812	0.26987	0.202396	0.22628	0.290856	0.00152189	0.0406823	0.0862663	37	13	24183666	AGTGGTTCATGCAAAAACTAGTTTCCTGATTTACTGCTGCGAGGCGATCG	F	TNFRSF19;TNFRSF19	NM_018647;NM_148957	Body;Body				TRUE					24183666	24183789	NC_000013.10
cg18232125	0.557612	0.560628	0.546418	0.539546	0.551716	0.569224	0.583434	0.620035	0.62682	0.680709	0.675545	0.656137	0.00176852	0.0431808	0.0862558	37	5	166696433	CGGATGATAACAAGATCATTTTGCTCTGTGTATGAGATTTTCTGTGAGGG	R							TRUE					166696433	166696556	NC_000005.9
cg07157117	0.581639	0.634559	0.572572	0.630602	0.638895	0.65524	0.686718	0.712216	0.703309	0.684301	0.735359	0.709084	0.000619767	0.0292576	0.0862468	37	4	109708677	CGTTCTTGCAAGAAGGATCAGCCCTTTCCATACCAGCCTTGTGCAAGACG	F								4:109927935-109928175				109708677	109708800	NC_000004.11
cg03399210	0.700959	0.670209	0.708101	0.70484	0.678376	0.726386	0.740537	0.756869	0.773994	0.779064	0.818776	0.837081	0.00110282	0.036141	0.0862417	37	8	37616064	CTTCTTCTATGTGCTATCCCATTTGTAATCTTATTCCATTTTTTTTCACG	F				chr8:37619779-37620770	N_Shelf							37616064	37616187	NC_000008.10
cg15926477	0.655736	0.63946	0.667829	0.679411	0.678269	0.63973	0.750872	0.769479	0.691801	0.742538	0.721138	0.801849	0.00146747	0.040199	0.0862068	37	14	72231668	TCTCCCATAAGTAGTTTTAACAGCTGTCTTTTCACTGTCTCTCCTCCCCG	F							TRUE					72231668	72231791	NC_000014.8
cg08239103	0.729384	0.708371	0.773475	0.729617	0.730109	0.763615	0.820287	0.823535	0.861036	0.830137	0.781213	0.835357	0.000150115	0.017739	0.0861659	37	11	16623818	CGAGGTGTTGGTGATACATGAGAAAAGCAACAGAGGATGTCACTATGCCT	F				chr11:16626053-16629180	N_Shelf							16623818	16623941	NC_000011.9
cg14877589	0.708024	0.662662	0.658512	0.717399	0.683425	0.659244	0.775299	0.773154	0.756888	0.775415	0.801362	0.724114	0.00017836	0.018836	0.086161	37	14	60864519	CGCCATGGATGAGGATGGGGACGAGAGCATTCACAAACTGAAAGAAAAAG	F				chr14:60864443-60864677	Island			14:59934206-59934430				60864519	60864642	NC_000014.8
cg07494499	0.163644	0.126423	0.118377	0.107757	0.143502	0.154613	0.216724	0.189261	0.238649	0.215518	0.218446	0.252509	4.4e-05	0.0120005	0.0861317	37	17	837017	CGTGGTCAACTTTAGAAATGTGCCTTCGTGTAAGCTGGTTTTTATAAAAT	F	NXN	NM_022463	Body			CDMR					TRUE	837017	837140	NC_000017.10
cg17972491	0.165982	0.125046	0.144995	0.111193	0.112601	0.132948	0.212931	0.244139	0.265442	0.228683	0.167526	0.190433	0.000914785	0.0337712	0.0860649	37	Y	6742726	CGGGCAAAGAAGGCCATCATACTTAGAAAGGTTGATACGCTATGTAGGAT	R	AMELY	NM_001143	TSS1500									6742726	6742849	NC_000024.9
cg14188441	0.137592	0.130744	0.188764	0.10998	0.153272	0.133811	0.254956	0.189526	0.262892	0.185876	0.200775	0.276386	0.00209879	0.0460091	0.0860414	37	3	241182	GTTATATAGGTCCTCCAACCTATCTGCTGATAAGTACACTGTACACTTCG	R	CHL1	NM_006614	5'UTR	chr3:238391-240140	S_Shore							241182	241305	NC_000003.11
cg01030481	0.720027	0.717846	0.725494	0.736826	0.710625	0.72953	0.797051	0.769069	0.818401	0.797286	0.870711	0.803558	0.0011711	0.0369323	0.0859546	37	15	40423556	CGGGGAGGAGAGGATGATACTACTACCAGTATTGAAGGAGGTGTTCACCA	F								15:38210572-38210849				40423556	40423679	NC_000015.9
cg25981315	0.501646	0.51299	0.519071	0.510695	0.537507	0.505598	0.555495	0.589727	0.601372	0.614995	0.647838	0.593763	0.000450123	0.0262865	0.0859473	37	8	39806701	AGATATGTGATAGCTTTCCAAAGACAATGGCACTGCTGTCTTCACATTCG	F	IDO2	NM_194294	Body				TRUE					39806701	39806824	NC_000008.10
cg26484001	0.214011	0.137691	0.195927	0.156301	0.151643	0.205226	0.253726	0.268629	0.266178	0.232233	0.278286	0.277326	0.000481255	0.0269516	0.0859295	37	10	33630103	AGTATCTTTTAGCAAATATTTTCCCTTGCTGTCTACATTGCTATTTATCG	F				chr10:33623120-33626197	S_Shelf							33630103	33630226	NC_000010.10
cg08115553	0.14365	0.13657	0.129217	0.137548	0.143474	0.131705	0.21243	0.227967	0.255257	0.190496	0.219745	0.231773	0.000104267	0.0158008	0.0859177	37	17	13215554	CGTGCATAATGGGGGAGAAAAAAACTAAGAAGGGCTGATTACTGCAATAG	F							TRUE					13215554	13215677	NC_000017.10
cg10012711	0.617317	0.632097	0.624843	0.622496	0.622556	0.646002	0.710056	0.71206	0.717249	0.735168	0.661062	0.745198	0.000423556	0.0256938	0.0859136	37	6	28553927	ATCATTTAATTATTTGTATCATACACAAAAACTGTTATCTCATATGCACG	R	SCAND3	NM_052923	Body	chr6:28554863-28555124	N_Shore	RDMR						28553927	28554050	NC_000006.11
ch.5.2533205R	0.106392	0.0716516	0.0807987	0.0566656	0.0681851	0.0886245	0.18557	0.165145	0.207309	0.124287	0.125589	0.179897	0.000668277	0.0300084	0.0859131	36	5	137273929	CAGCTGCTTCAATATGTTATTCAATGTTAATGTTTGGCTGTGAGTAGAAT	F	FAM13B;PKD2L2;FAM13B;FAM13B	NM_001101800;NM_014386;NM_001101801;NM_016603	3'UTR;Body;3'UTR;3'UTR									137273929	137274052	NC_000005.9
cg00997262	0.664846	0.686521	0.598854	0.602033	0.61045	0.663453	0.694465	0.720565	0.747677	0.719432	0.749827	0.709574	0.00141974	0.0398171	0.0858973	37	16	19421265	CGGATTAACATCCAAAGGACTGAGCACTGAACAAAGAGTTAAGTTAACTT	F	TMC5;TMC5	NM_001105248;NM_001105249	TSS1500;TSS1500	chr16:19421816-19422498	N_Shore							19421265	19421388	NC_000016.9
cg20203365	0.388977	0.366184	0.316493	0.348901	0.360322	0.361743	0.443868	0.392703	0.397611	0.455813	0.464903	0.502802	0.00248369	0.0492333	0.0858469	37	2	31470490	GCTGTGTCTCCTGCCTCCTTCCCAGGTATCTTACTAAGGGATAGAATTCG	R	EHD3	NM_014600	Body				TRUE					31470490	31470613	NC_000002.11
cg06065608	0.708023	0.656893	0.673669	0.73494	0.70852	0.745067	0.802519	0.755982	0.809983	0.798526	0.79548	0.779554	0.000697551	0.030561	0.0858221	37	6	163147999	CATCTTACACATCAAGTGTTCATGAACAACTCTGATGCCACTAAGTTTCG	R	PACRG;PACRG;PARK2;PACRG;PARK2;PARK2	NM_152410;NM_001080379;NM_004562;NM_001080378;NM_013987;NM_013988	TSS200;TSS1500;Body;TSS200;Body;Body	chr6:163148376-163149017	N_Shore				6:163147455-163149334	Promoter_Associated		163147999	163148122	NC_000006.11
cg02502025	0.687249	0.655768	0.646735	0.695043	0.681095	0.703412	0.774707	0.748252	0.805457	0.732764	0.714967	0.80751	0.00145925	0.0401244	0.0857256	37	4	42151282	CGACTAGTTTCTCAGAGAACCAATCAGCTCTTCAGGTGGCTGTTCTCTGA	F	BEND4;BEND4	NM_207406;NM_001159547	Body;Body	chr4:42152766-42154984	N_Shore							42151282	42151405	NC_000004.11
cg00080252	0.640992	0.619304	0.689608	0.626817	0.599443	0.631373	0.754516	0.693292	0.712635	0.726898	0.763059	0.671471	0.00118326	0.0370974	0.0857223	37	8	117948764	CGGCTCTATTGAAATGGCTTAAGGCTCAACTGGATAAGGAACAATACAGG	R				chr8:117950472-117950717	N_Shore							117948764	117948887	NC_000008.10
cg14818546	0.417198	0.422995	0.460568	0.442226	0.461828	0.463583	0.5164	0.547286	0.457579	0.53154	0.553552	0.576258	0.00225155	0.0474214	0.0857027	37	7	69296381	ATGAGATGCCTAACTCCAGGACTTCATCCTGTGGACTGCAGAATTAAACG	R	AUTS2;AUTS2;AUTS2	NM_015570;NM_001127232;NM_001127231	Body;Body;Body				TRUE					69296381	69296504	NC_000007.13
cg00564465	0.675336	0.66685	0.631995	0.693629	0.677751	0.653428	0.755056	0.761976	0.722278	0.777467	0.760707	0.735488	3.15e-05	0.0110942	0.0856642	37	8	61083352	CGCTCATGGGTTCTATTTTCTAGGGACAAGTGAATGAATAAAACTGGGTT	F				chr8:61086125-61086327	N_Shelf							61083352	61083475	NC_000008.10
ch.2.4215183F	0.0961994	0.0660931	0.0707695	0.0568248	0.055262	0.0711881	0.165619	0.132968	0.202918	0.113843	0.15293	0.162026	0.000392964	0.0250084	0.0856611	36	2	211401919	CAGCACATTGCTAAGGGTTAATTTTCAAACCAATGAGTGGTGAGAAGGGC	F	CPS1	NM_001122633	Body									211401919	211402042	NC_000002.11
cg12600021	0.574773	0.569244	0.529797	0.539231	0.549044	0.593402	0.676765	0.633317	0.697437	0.645942	0.606931	0.609007	0.00107687	0.0358144	0.0856512	37	20	32802173	CGTCACAGATGTATGCTGATAGGAACTGACTCCTGATGTTACCAGAGTTC	F				chr20:32803823-32804181	N_Shore							32802173	32802296	NC_000020.10
cg05405275	0.649857	0.661232	0.644253	0.629086	0.59703	0.632651	0.758526	0.68804	0.73823	0.739518	0.682465	0.721129	0.000326084	0.0233952	0.0856332	37	7	150525013	CGAAAGAAAAAAAGAACTGGAAACAAATTTGGAACTCTAGTTAATAATAT	R												150525013	150525136	NC_000007.13
cg27153782	0.648059	0.680147	0.734318	0.68784	0.706198	0.741445	0.782456	0.782448	0.766707	0.77153	0.800954	0.807673	0.000974681	0.0345966	0.0856269	37	10	15087026	AGCCATTATCTCTGGAGTATTGTCTCTGTCCCACTCTCCCTCTTCTCTCG	R	OLAH;OLAH	NM_001039702;NM_018324	5'UTR;5'UTR									15087026	15087149	NC_000010.10
cg04114386	0.698838	0.659432	0.684381	0.616187	0.686966	0.656438	0.755799	0.735053	0.787027	0.77502	0.722612	0.740034	0.000338802	0.0236371	0.0855505	37	4	42485483	CGGTTCTGTTTTATGCATGTTTCAAGACCATGAGGTCCCTACGCAGACAC	R	ATP8A1;ATP8A1	NM_001105529;NM_006095	Body;Body				TRUE					42485483	42485606	NC_000004.11
cg03593595	0.746863	0.716679	0.698963	0.675874	0.66773	0.69819	0.768162	0.786797	0.8095	0.761933	0.794803	0.796359	0.000210779	0.0199794	0.0855426	37	3	132977031	CGGAGGAAGGGGTGAGAAAGCTCCTTAAGGTCTCTTTTATAAGGGCATTA	R	TMEM108;TMEM108	NM_001136469;NM_023943	Body;Body									132977031	132977154	NC_000003.11
cg20719439	0.365933	0.429528	0.445641	0.340198	0.379191	0.378804	0.516516	0.464458	0.452008	0.489768	0.485421	0.444065	0.00196852	0.044885	0.0854904	37	6	97010071	CGGGTATATACAGTCAAAGAACTTGAGCTAGAGAAATGCAGAGCCAGTTA	R	FHL5;FHL5	NM_020482;NM_001170807	TSS1500;TSS1500									97010071	97010194	NC_000006.11
cg21910196	0.51282	0.496939	0.523839	0.560425	0.547474	0.541135	0.620355	0.599222	0.60347	0.615616	0.645571	0.610701	4.87e-05	0.0122453	0.0853835	37	14	72402619	AAACCAGCAGTCAGCATCATCCAGGGACTTGTTAGATATGTACCTTCTCG	F	RGS6	NM_004296	5'UTR	chr14:72398664-72399554	S_Shelf							72402619	72402742	NC_000014.8
cg25361651	0.121337	0.0954521	0.107244	0.109113	0.101971	0.12907	0.233218	0.189852	0.222357	0.158698	0.163696	0.208491	0.000505739	0.0272989	0.0853541	37	20	29847402	CGACCAAAAAGAGACAAGTGAGCTATATATCTAGTTGCGACTCCTAATTC	F	DEFB115	NM_001037730	Body									29847402	29847525	NC_000020.10
cg10314052	0.718908	0.761014	0.676743	0.782049	0.708199	0.758373	0.845983	0.776435	0.811094	0.849078	0.819188	0.815484	0.00186331	0.0440239	0.0853295	37	22	43835141	TTGCCCGTTTGCCGGCTTCTAGCTGGGTCTGCGTTCATGGGAGGGGGACG	R	MPPED1	NM_001044370	Body	chr22:43830899-43831162	S_Shelf	CDMR						43835141	43835264	NC_000022.10
cg01580934	0.0863434	0.0772976	0.0862265	0.0667563	0.0647435	0.0940016	0.193797	0.187054	0.189521	0.133001	0.136099	0.147735	0.000327625	0.0234115	0.0853064	37	7	104909815	CGGGGTTCTGGTTTAATATTTCATTCTTAAGTGACAAAAATGATTCACTG	R	SRPK2;SRPK2	NM_182691;NM_182692	TSS1500;Body				TRUE		7:104909001-104910362	Promoter_Associated		104909815	104909938	NC_000007.13
cg10441909	0.370442	0.357722	0.404836	0.377463	0.434585	0.384916	0.457083	0.454642	0.508926	0.438705	0.488264	0.493968	0.000308601	0.022908	0.0852709	37	12	13712678	CGTGGAAAAATCTCCACTAACTCTACTTTTTGAAGCATGTGATATCTGGT	R				chr12:13715849-13717034	N_Shelf							13712678	13712801	NC_000012.11
cg11200930	0.665753	0.656525	0.708454	0.709531	0.648984	0.697096	0.734788	0.743254	0.779447	0.76761	0.808881	0.763402	0.000263536	0.0216746	0.0851732	37	3	12856409	GGATGGGGCTAAGCATGTCAAACCCATAATCTTATTTTAGCTTCATGACG	F	CAND2;CAND2	NM_001162499;NM_012298	Body;Body	chr3:12856649-12856863	N_Shore							12856409	12856532	NC_000003.11
cg00590590	0.143453	0.0700185	0.100532	0.0671262	0.0939427	0.105727	0.227099	0.187757	0.202828	0.125712	0.182994	0.165247	0.00094147	0.0341387	0.0851397	37	17	68559893	TTAAGCAATCTTCTTTAAGACTAAATACTAGAACAGATGGTCCAGACACG	F							TRUE					68559893	68560016	NC_000017.10
cg22762745	0.840364	0.831319	0.814916	0.802713	0.780192	0.843328	0.931783	0.897378	0.926334	0.917237	0.844137	0.906767	0.000501561	0.0272433	0.085134	37	3	195602360	CGCACACTCCAAGGCAGCTTCATCCCAAGGCTCCAGTGGGACTTCCAAGA	F	TNK2;TNK2	NM_001010938;NM_005781	Body;Body	chr3:195600845-195602361	Island			3:197085695-197087283	3:195602325-195602570	Unclassified_Cell_type_specific		195602360	195602483	NC_000003.11
cg25876586	0.408981	0.351537	0.382918	0.422062	0.380741	0.351316	0.446474	0.482136	0.425457	0.467316	0.523464	0.46318	0.000869256	0.0332412	0.0850786	37	8	75260202	CGCCTTAGGAACAGCTGGGCCATGAACTTGGGGAAAATTGAGCTTCTAAA	R				chr8:75262521-75263044	N_Shelf							75260202	75260325	NC_000008.10
cg00814218	0.447446	0.493096	0.505236	0.513969	0.524217	0.526787	0.622281	0.538372	0.586691	0.571995	0.579511	0.622211	0.000746848	0.031393	0.0850519	37	14	37445440	CGGTAGGCAGGTCCCCAACAAGTGGTGGGGGCTCCTCATGCATACACGTT	F	SLC25A21;SLC25A21	NM_030631;NM_001171170	Body;Body				TRUE		14:37444985-37445934	Unclassified_Cell_type_specific		37445440	37445563	NC_000014.8
cg15737302	0.714388	0.717228	0.726941	0.72774	0.734224	0.743366	0.79046	0.812263	0.829991	0.777346	0.809761	0.854048	0.000281317	0.0222006	0.084997	37	11	118302063	CCAATAATGTTAGCTATATGATCTTGAACCAGGCACCCAGCCTCAGTACG	F				chr11:118305422-118307705	N_Shelf							118302063	118302186	NC_000011.9
cg20064151	0.198032	0.134987	0.232102	0.206182	0.197316	0.160226	0.27556	0.250396	0.269636	0.229182	0.287961	0.325968	0.00148418	0.0403016	0.0849763	37	1	145438865	GAAGATCAAGTCTTTTGAGGTGGTCTTTAACGACCCTGAAAAGGTGTACG	R	TXNIP	NM_006472	1stExon					1:144150222-144150307				145438865	145438988	NC_000001.10
cg23217527	0.636686	0.607474	0.610802	0.617171	0.632136	0.662834	0.786569	0.709843	0.674085	0.70196	0.712553	0.691514	0.00168294	0.0423302	0.0849034	37	3	107639884	CGACAGAGTGTGGGACAGGGTCTATAGAATTTTGCCACAGGGGGCCCCAA	R	LOC285205	NR_015394	Body				TRUE					107639884	107640007	NC_000003.11
cg22431753	0.649749	0.619969	0.639149	0.673106	0.617569	0.648495	0.702064	0.67867	0.752596	0.723177	0.747264	0.753142	0.000363954	0.024186	0.0848126	37	1	232415965	ATTACTGACTCTTTCTTCTAGTACACACATAACACACTGTGTTTGTGTCG	F							TRUE					232415965	232416088	NC_000001.10
cg07622201	0.679411	0.642591	0.679797	0.645197	0.655027	0.69728	0.782437	0.747728	0.742639	0.731639	0.772245	0.731484	5.02e-05	0.0123047	0.0848114	37	7	49929836	CGCTTGACCTGGGAAAATTATTAGGATAGTACATCACCTTGTCTTTTTGC	R	VWC2	NM_198570	Body				TRUE					49929836	49929959	NC_000007.13
cg01804944	0.627784	0.654206	0.596242	0.638736	0.638703	0.626969	0.69188	0.710051	0.745373	0.702108	0.722323	0.719763	1.61e-05	0.00876782	0.0848097	37	8	1197488	CGGCCACCAACATGGACCATCACTCCCACACTGATCTCAAAGGTCTTGCC	R								8:1184895-1186031				1197488	1197611	NC_000008.10
cg21667998	0.100255	0.0640311	0.0772488	0.0497638	0.0590141	0.0729719	0.149167	0.179058	0.179991	0.0990678	0.134993	0.189514	0.000866977	0.0332055	0.0847511	37	11	55593465	CTCTGTTGGTCTCCAGTCCAGATTCTTTTCTGCCCAGAGTGCTCAGCTCG	R	OR5L2	NM_001004739	TSS1500									55593465	55593588	NC_000011.9
cg24166463	0.551441	0.541884	0.559532	0.572674	0.551581	0.581572	0.673009	0.617302	0.650002	0.624389	0.660434	0.641952	2.24e-05	0.00973242	0.0847339	37	11	4903155	TAGTTCAGTGTCTTCAACCAACCATGGCAATATTCAATAACACCACTTCG	R	OR51T1	NM_001004759	1stExon				TRUE					4903155	4903278	NC_000011.9
ch.2.1302556R	0.119639	0.109312	0.115248	0.08291	0.151263	0.0925771	0.164116	0.227688	0.219091	0.179822	0.143221	0.245379	0.00205018	0.0456137	0.0847281	36	2	55898306	CAGCTGCTGTTCCCTAGACCTAGAATGCTCTCTCATAGCAGGTGGTCTTC	F	PNPT1	NM_033109	Body									55898306	55898429	NC_000002.11
cg03999067	0.341305	0.280776	0.282861	0.354301	0.373077	0.331899	0.38413	0.4416	0.403909	0.423035	0.455037	0.364713	0.00236008	0.0482587	0.0847009	37	12	59730539	TTCTAAGTTTATGTTTTCTCTGAACTATCCATTTTACTTGTATCTCATCG	R							TRUE					59730539	59730662	NC_000012.11
cg00539300	0.326214	0.34139	0.359403	0.397515	0.359328	0.398894	0.421699	0.439829	0.422343	0.461488	0.459258	0.486171	0.000347857	0.0238138	0.0846742	37	16	2895093	CGGTTTAAGCCTGAAATGACCTTCTCAAGACCCCTTGATATGCAAATCTG	F				chr16:2892579-2892810	S_Shelf							2895093	2895216	NC_000016.9
cg07014206	0.663161	0.559328	0.627555	0.6174	0.605983	0.61871	0.661964	0.686129	0.661013	0.725601	0.711543	0.753576	0.0020281	0.0454383	0.0846144	37	10	2547000	GCTGGGCCCAAGATTTCAGTCTTCTGCGGGACCTCGTCCATTTACAATCG	F				chr10:2543463-2544121	S_Shelf							2547000	2547123	NC_000010.10
cg04646173	0.722099	0.701234	0.712637	0.686024	0.662467	0.728322	0.801641	0.782564	0.767524	0.760208	0.796921	0.811151	8.06e-05	0.0144642	0.0845379	37	5	140586788	CGCAAGATCTGGAGGAACCAGATGTTTAAGAAGACTGAAGTCAGTTAAGG	R				chr5:140589744-140590657	N_Shelf							140586788	140586911	NC_000005.9
cg24437311	0.648615	0.734257	0.699818	0.708949	0.685317	0.736022	0.762385	0.824531	0.75892	0.760533	0.802184	0.811299	0.000872241	0.033287	0.0844787	37	3	44753069	CGTGGTACATCCTTTCAGATGTGCAGAGAGCTTGCTTTCTGGATTTAATC	F	ZNF502;ZNF502;ZNF502;ZNF502	NM_001134441;NM_033210;NM_001134440;NM_001134442	TSS1500;TSS1500;TSS1500;TSS1500	chr3:44754099-44754399	N_Shore							44753069	44753192	NC_000003.11
cg02634507	0.74648	0.679109	0.79005	0.71399	0.729477	0.7291	0.808521	0.78811	0.817966	0.782108	0.855713	0.842322	0.00146845	0.0402044	0.0844223	37	11	6805810	CGGAAAAAGAAGTGAAAGTGCTTTATTGAAAACCAGTCTCTGTACCTGTT	F	OR2AG1	NM_001004489	TSS1500									6805810	6805933	NC_000011.9
cg07160602	0.594757	0.53549	0.592635	0.580556	0.616543	0.593079	0.702353	0.661052	0.648548	0.620168	0.658941	0.728432	0.00188579	0.0441907	0.0844058	37	15	99196841	GCACACAGTTTCAAAACAAAAATGCCTTTGCCACATTTTAAAACCTTTCG	F	IGF1R	NM_000875	Body	chr15:99190446-99194559	S_Shelf							99196841	99196964	NC_000015.9
cg17593512	0.472522	0.459975	0.506228	0.489563	0.47955	0.482751	0.56937	0.518123	0.59654	0.550119	0.588351	0.574313	0.000247723	0.0210478	0.0843712	37	4	40441513	CGGGCTTGGTCCAGGAACTGTAATAAGAGCTAATCTGATTTTGATGGTGG	F	RBM47;RBM47	NM_019027;NM_001098634	5'UTR;5'UTR	chr4:40439821-40440905	S_Shore							40441513	40441636	NC_000004.11
cg06511049	0.581344	0.611049	0.611888	0.649402	0.672998	0.650413	0.742979	0.725798	0.705811	0.695469	0.700061	0.71316	0.000759597	0.0316136	0.0843642	37	6	42876167	ATACATGAAATATGTGCCTATCCTCATGAAGATAAAATACAGCCCCTTCG	F				chr6:42879279-42879623	N_Shelf							42876167	42876290	NC_000006.11
cg09366336	0.279421	0.206001	0.238187	0.297223	0.202022	0.220665	0.321994	0.355384	0.320326	0.276706	0.33449	0.340758	0.00201896	0.045356	0.0843566	37	7	21293933	CGCAGAGCTGCCCGTTAGCCGATACACATTTGTGATGTAAAAATCACATT	F							TRUE		7:21293552-21294056	Unclassified		21293933	21294056	NC_000007.13
cg23698950	0.590385	0.569238	0.577587	0.541365	0.583151	0.57148	0.639942	0.632272	0.679659	0.626861	0.663772	0.696771	0.000209701	0.0199541	0.0843452	37	6	30110123	TAAAAGCCTCACCACTACTAGCATTCATAATCAAGCAAAGTAAAACAACG	F	TRIM40	NM_138700	Body									30110123	30110246	NC_000006.11
cg19825483	0.129586	0.116534	0.13841	0.132878	0.123011	0.13112	0.173558	0.245914	0.251553	0.173172	0.227245	0.20585	0.00151473	0.0406202	0.0842921	37	1	237831370	CGGTTTAATTGTGCCTGTAACAGATTGAAGTTGGAAATGCTGTAATTTCC	F	RYR2	NM_001035	Body			RDMR						237831370	237831493	NC_000001.10
cg13523386	0.595998	0.58338	0.583942	0.58894	0.606554	0.62079	0.664647	0.664954	0.730326	0.65373	0.653975	0.717704	0.000923939	0.0338956	0.0842886	37	4	71457838	CGCAATAAAAGGGTGTGGACTAATTGCAGGAGCAGAGATTCCCGCCCCAA	F	AMBN	NM_016519	TSS200									71457838	71457961	NC_000004.11
cg21643086	0.161864	0.121656	0.140899	0.113922	0.173971	0.128632	0.196906	0.196732	0.24683	0.239779	0.202449	0.263907	0.000313815	0.0230462	0.0842765	37	6	27243037	CGCTCTAACCAACTGAGCTAACCAGCCGACGCTGGGTGCAGCTCTTCCCC	F								6:27350897-27351089				27243037	27243160	NC_000006.11
cg08680129	0.730545	0.74683	0.780619	0.809672	0.793461	0.800249	0.825312	0.833159	0.881969	0.848047	0.898718	0.879797	0.000772176	0.0318078	0.0842709	37	19	40920614	CGGGGGGCGGCACAGGGAGCACAGGTACCCCCACATGCCACTTGAACCCA	F	PRX;PRX	NM_020956;NM_181882	TSS1500;TSS1500									40920614	40920737	NC_000019.9
cg03018634	0.710566	0.744633	0.751729	0.723854	0.728713	0.757326	0.832901	0.782093	0.82018	0.794911	0.83398	0.858289	0.000193811	0.0193722	0.0842556	37	3	36424308	CATTTTCCTCACCAAGCTCTCATGCTCAGGGTCAAAGATCCTTGTAAACG	F	STAC	NM_003149	Body	chr3:36421702-36422210	S_Shelf							36424308	36424431	NC_000003.11
ch.9.919537F	0.156892	0.109082	0.19099	0.0983014	0.151815	0.113183	0.226063	0.21566	0.240954	0.198346	0.188594	0.256148	0.00109856	0.036104	0.0842506	36	9	76690975	CAGTCATCTTCTCACTGTGTCCTCACATGGCAGAAAAGAACTAGAGAACT	F												76690975	76691098	NC_000009.11
cg04265188	0.242554	0.213375	0.236422	0.22678	0.175328	0.186771	0.2715	0.306963	0.233438	0.311298	0.322242	0.340716	0.00188207	0.0441698	0.0841544	37	16	66239334	CGATTGAGACCTGCTGCGGTCGCTCTTTGGTTTACACCTCTACACTGGAC	R							TRUE					66239334	66239457	NC_000016.9
cg13673094	0.596528	0.583275	0.564472	0.614459	0.563161	0.597371	0.638557	0.734007	0.63911	0.649207	0.661525	0.7016	0.00180394	0.0435103	0.0841229	37	1	198608361	CGCATGCTGTTTCTTAGGGACACGGCTGACTTCCAGATATGACCATGTAT	F	PTPRC;PTPRC;PTPRC;PTPRC	NM_080921;NM_080923;NM_080922;NM_002838	5'UTR;5'UTR;5'UTR;5'UTR						1:198608043-198608365	Promoter_Associated		198608361	198608484	NC_000001.10
cg22508338	0.427677	0.469665	0.441156	0.504256	0.492567	0.479953	0.543858	0.501562	0.547718	0.540038	0.586537	0.600211	0.00131519	0.0385457	0.0841083	37	8	1327575	CGGGCAGGGAGACTAAATACCTCAGACCAAGGCAGCCTCCGTCTGCCGAG	F				chr8:1327331-1327547	S_Shore			8:1314806-1315094				1327575	1327698	NC_000008.10
cg19075005	0.663717	0.666967	0.647792	0.647256	0.653389	0.719989	0.769063	0.719227	0.776644	0.717672	0.799046	0.721933	0.00114495	0.0366707	0.0840795	37	13	23412996	CGCTGCAGAGTTAACTTCAGTTGGGATGTGAGCCCAATGCTTTATCAGCA	R				chr13:23412207-23412623	S_Shore							23412996	23413119	NC_000013.10
cg11479000	0.121779	0.111874	0.132996	0.154827	0.119496	0.113361	0.182097	0.171609	0.200048	0.234439	0.218151	0.252384	0.000463531	0.0265777	0.0840659	37	5	112044832	CGTTTTCTTGAAGTTATGCTAGATGTTCTCCAAAGTTGTTAAGCACAAAC	F	APC	NM_001127511	5'UTR	chr5:112043079-112043917	S_Shore	RDMR						112044832	112044955	NC_000005.9
cg21653586	0.157074	0.170375	0.162957	0.152773	0.161029	0.205226	0.261867	0.326466	0.236641	0.244341	0.222021	0.222288	0.00199248	0.0451592	0.0840318	37	11	10530636	TGCTTGGTTGCAATTTTTCATCTTTCCCTTGCGGTACTATATCTATTGCG	R												10530636	10530759	NC_000011.9
cg12001078	0.743355	0.682861	0.71207	0.659403	0.718277	0.699158	0.78084	0.834567	0.802493	0.745428	0.762949	0.792909	0.000720135	0.0309736	0.0840101	37	4	100790361	CGGGGGAGTAACACTAAAGCTACAAGAAATATGTAATAATGATAGGTAAT	F	DAPP1	NM_014395	3'UTR									100790361	100790484	NC_000004.11
cg11201398	0.600888	0.602142	0.593893	0.648106	0.631345	0.616459	0.667167	0.669934	0.729801	0.655078	0.745782	0.728864	0.00201538	0.0453466	0.0839652	37	15	47891504	ATTAATACCACTGCATCCTGGTAACTCCCCTCACTTCATTCTAGCCAACG	R							TRUE					47891504	47891627	NC_000015.9
cg26270975	0.181699	0.116554	0.187096	0.136287	0.127321	0.114257	0.236042	0.217493	0.24298	0.19192	0.214526	0.263767	0.00063485	0.0295113	0.0839192	37	10	44099144	CAGCTTCAGAGATTCTGAATTAATTGCCCTAAGTGTGGTCCTGGCATTCG	F				chr10:44101813-44102366	N_Shelf							44099144	44099267	NC_000010.10
cg09282336	0.789994	0.849733	0.775487	0.804763	0.811875	0.825458	0.891427	0.923691	0.879446	0.867978	0.895815	0.90235	0.000126941	0.0168875	0.0838993	37	16	81526954	CGCGTTACCTGTCGTTACCTGTCGTTACCTGTCGTTACCTGTTGTCTGGA	F	CMIP	NM_198390	Body				TRUE	16:80084455-80084752				81526954	81527077	NC_000016.9
cg09631495	0.585925	0.632695	0.634525	0.672548	0.643919	0.637604	0.76048	0.732132	0.72821	0.664555	0.718954	0.705924	0.00072172	0.031	0.0838398	37	8	4617087	CGGGGAAAGGGAGAGCATTAGGAAAAAAATCCTAGTGCATGCTGGGCTTA	R	CSMD1	NM_033225	Body									4617087	4617210	NC_000008.10
cg14043298	0.676996	0.626705	0.596115	0.642267	0.625462	0.59627	0.690031	0.708305	0.721491	0.699448	0.711337	0.736217	0.000408047	0.0253302	0.0838355	37	6	33136297	CGCTTTCCAAGTGGCCCTGGGGGTCCATTCTCCCCGGTGGGACCAGGGGA	F	COL11A2;COL11A2;COL11A2	NM_080679;NM_080681;NM_080680	Body;Body;Body									33136297	33136420	NC_000006.11
cg18766383	0.116519	0.0822862	0.149705	0.0779628	0.0825966	0.0974818	0.202844	0.171363	0.206294	0.144193	0.171715	0.213053	0.000336449	0.0236086	0.0838185	37	5	92832939	CGTCCTTCACATTGCATTTATGGAAACTCAATCAGAAAGCTAGCTTTTGG	R	FLJ42709;FLJ42709	NR_021491;NR_015369	Body;Body				TRUE					92832939	92833062	NC_000005.9
cg03988374	0.518642	0.484115	0.505755	0.518644	0.509507	0.514768	0.597068	0.554287	0.552217	0.625522	0.635871	0.588979	0.00123578	0.0377024	0.0837522	37	6	68726169	AATAAGGCTCTTCTCAGGCTAAACACCTTACTGTAATCTCTATACCTACG	F							TRUE					68726169	68726292	NC_000006.11
cg14387182	0.411645	0.356953	0.351105	0.336262	0.318826	0.371515	0.444177	0.452897	0.493765	0.424053	0.408823	0.424958	0.000885774	0.0334092	0.0837276	37	6	126114653	CGCAGTGCCTCTGGGATTGGTTGACTCACTTTTGGGTCCTACCTCCTGAT	F	NCOA7;NCOA7	NM_181782;NM_001122842	5'UTR;5'UTR	chr6:126111537-126112480	S_Shelf							126114653	126114776	NC_000006.11
cg04822213	0.454078	0.403852	0.382018	0.358773	0.383477	0.40373	0.516922	0.458453	0.511556	0.440106	0.493482	0.467211	0.0010032	0.0350351	0.0836335	37	X	100223435	CGGCCAGGTGATCAAGGTTAACATCATCAGTGATAAGTCATGTTGACAGC	F	ARL13A;ARL13A;ARL13A	NM_001162490;NM_001162491;NM_001012990	TSS1500;TSS1500;TSS1500									100223435	100223558	NC_000023.10
cg26365254	0.562516	0.559898	0.580491	0.57917	0.591272	0.615155	0.631003	0.711152	0.6741	0.646094	0.681573	0.646166	0.000304928	0.022846	0.0835978	37	1	157952118	CGTGGTTCTGCATAAAAGATGCAAGAGTAAGATATTGTAACTACAGTTCA	R				chr1:157948720-157949053	S_Shelf							157952118	157952241	NC_000001.10
cg16244690	0.634162	0.578446	0.615354	0.574778	0.570807	0.632755	0.67641	0.649426	0.742759	0.681609	0.662973	0.694546	0.000924458	0.0339044	0.0835705	37	1	111890580	GACCATTTCTTCAGTAAATTGTTTTCCACTCTCCCCGGTACACTCACACG	F	C1orf88	NM_181643	Body	chr1:111889138-111889539	S_Shore				1:111890506-111890672	Unclassified_Cell_type_specific		111890580	111890703	NC_000001.10
cg22033530	0.298296	0.372951	0.371579	0.298047	0.312582	0.355447	0.41849	0.377439	0.425379	0.403581	0.448717	0.436701	0.00117215	0.0369444	0.0835677	37	19	55692003	CGCCCTCTAAGTTCCCCTAACACCAGTCCCAGGAGGCGGCCAGTGCGGTG	F	SYT5	NM_003180	TSS1500	chr19:55690182-55691623	S_Shore				19:55690122-55692080	Promoter_Associated		55692003	55692126	NC_000019.9
cg24394097	0.546951	0.510405	0.554754	0.512015	0.506209	0.547441	0.6053	0.61229	0.60333	0.594123	0.639008	0.624447	3.68e-05	0.0115651	0.0834536	37	3	155860792	CGGGAACTTAGGAGCCTGCTCGCCTACAAAAATGATAAGAGAGATCTAAA	F	KCNAB1;KCNAB1;KCNAB1	NM_003471;NM_003471;NM_172160	1stExon;5'UTR;Body									155860792	155860915	NC_000003.11
cg19389852	0.385951	0.375052	0.350031	0.340681	0.411431	0.342815	0.439975	0.502964	0.490216	0.396784	0.443736	0.432639	0.00216222	0.04663	0.0833922	37	1	145439013	CGCAGGTACTCCGAAGTCTGTTTGCACTGCTGGGATCCCTGCATCCAAAG	R	TXNIP	NM_006472	1stExon									145439013	145439136	NC_000001.10
cg23212445	0.182136	0.228817	0.232924	0.240104	0.220276	0.272411	0.308595	0.268576	0.316532	0.372568	0.292916	0.317668	0.00121244	0.0374089	0.0833644	37	2	176928222	TAATGCTAAGCCAGTCCTCCCATCTGTGGTTTAATAAACAAGGAATAACG	R				chr2:176931575-176932663	N_Shelf							176928222	176928345	NC_000002.11
cg12160527	0.167785	0.161508	0.17376	0.158044	0.136943	0.192804	0.272439	0.234805	0.256665	0.216651	0.220983	0.289347	0.000291204	0.0224661	0.0833409	37	12	51347610	CGGTAGTGAAAAGTGTGAAGGAAAGACAATTGTTTCAGTTGAGCAGATAG	F	HIGD1C	NM_001109619	TSS200									51347610	51347733	NC_000012.11
cg22162312	0.651305	0.65345	0.66243	0.671917	0.672816	0.704893	0.757109	0.700402	0.734944	0.795894	0.779788	0.748488	0.000782691	0.0319886	0.0833027	37	2	47793276	TTTTTATTTCGCTTGAGCTATTCAGATTGACTTTCTACACAGCCTGAACG	R	KCNK12	NM_022055	Body	chr2:47796923-47799166	N_Shelf							47793276	47793399	NC_000002.11
cg10973881	0.540134	0.523241	0.512282	0.519638	0.504665	0.496988	0.599704	0.54553	0.64704	0.587601	0.615151	0.601618	0.000851501	0.0329797	0.0832825	37	1	151148689	TCTCTTCCACTTCCCTTCATACAAGCCCCAGTCTGAGACATATGAGTTCG	R	TMOD4	NM_013353	TSS200						1:151148013-151148862	Gene_Associated		151148689	151148812	NC_000001.10
cg02107461	0.414667	0.372694	0.367143	0.359665	0.432029	0.368626	0.492923	0.490518	0.518747	0.421044	0.447339	0.443915	0.00179515	0.0434103	0.083277	37	Y	14103651	CGCTGCTATGGTGGAGAATCCCTGGATTGTGCTGTCTTCGGCATTCAGCA	F				chrY:14107137-14107480	N_Shelf							14103651	14103774	NC_000024.9
cg21236569	0.491581	0.492993	0.561288	0.566572	0.575718	0.565973	0.628198	0.613056	0.624731	0.633812	0.659013	0.594657	0.00196159	0.0448368	0.083224	37	17	59265780	CACTTGCCTCCCAGACTTGTGGTCCATACCAGAATATAAACTAGGAATCG	F	BCAS3;BCAS3	NM_001099432;NM_017679	Body;Body				TRUE					59265780	59265903	NC_000017.10
cg21730858	0.643814	0.607508	0.666414	0.645702	0.650843	0.677933	0.715419	0.72633	0.745023	0.689763	0.723712	0.791136	0.000877142	0.0333092	0.0831949	37	6	138806320	CTCAAGATCAAATCGCCTGCAAAGATTCTAAGCCAACACGGGAGACTTCG	R	NHSL1;NHSL1	NM_001144060;NM_020464	Body;Body				TRUE					138806320	138806443	NC_000006.11
cg23394916	0.728958	0.636345	0.666764	0.637507	0.650417	0.683122	0.781675	0.724163	0.777501	0.733377	0.709039	0.776342	0.00161369	0.0416158	0.0831639	37	1	6246147	TCATTTCTGTACACATTTAGTTAATTTAGAACCTGGGACTTTTACAATCG	R	RPL22	NM_000983	3'UTR						1:6245409-6246358	Gene_Associated		6246147	6246270	NC_000001.10
cg01639635	0.126798	0.109764	0.14111	0.10584	0.135219	0.127046	0.188512	0.193007	0.223692	0.168032	0.20791	0.263046	0.000880127	0.0333407	0.0830706	37	14	57859336	CGTTGACTGCAGGTGTATGCTTTGTATCATGTGCTCACAAGCATATTGTT	F	NAA30	NM_001011713	Body	chr14:57856944-57858351	S_Shore	RDMR						57859336	57859459	NC_000014.8
cg12620645	0.190086	0.160875	0.177225	0.128356	0.153731	0.157925	0.221926	0.274717	0.255807	0.180339	0.251712	0.281994	0.00161533	0.0416265	0.0830493	37	12	92899917	TGAATCTCCAGAGACTGGGTGTGAACGTGACTTTTCACCCCTGGGTCACG	R							TRUE		12:92899164-92900022	Unclassified_Cell_type_specific		92899917	92900040	NC_000012.11
cg14238986	0.587585	0.599135	0.560703	0.569256	0.624071	0.605264	0.669925	0.647405	0.691027	0.657276	0.690638	0.687987	6.3e-05	0.0133408	0.0830404	37	6	32071835	CGCTGACCAATATGGTAGCCAGGAGGGATATGAGGCTCTGCAACACTTGA	F	TNXB	NM_019105	5'UTR									32071835	32071958	NC_000006.11
cg05099186	0.808277	0.769448	0.790003	0.779134	0.786903	0.778832	0.854376	0.900923	0.862066	0.823276	0.869444	0.900533	0.000427122	0.0257573	0.0830034	37	13	39923838	CGTAGTGCGGTCAGGTCAGTGAAAGAGAGCCTTAAATTAGAAGTGAGATC	F	LHFP	NM_005780	Body				TRUE					39923838	39923961	NC_000013.10
cg24265969	0.182128	0.148607	0.0950363	0.127152	0.112025	0.104464	0.238472	0.215662	0.201967	0.14922	0.216204	0.245801	0.00156924	0.0411594	0.0829855	37	3	55654481	GAATGTGCAGAGTCATTGTGAAAAGCAAGTCCGTGCTGCTTTAGGGCTCG	F	ERC2	NM_015576	3'UTR				TRUE					55654481	55654604	NC_000003.11
cg02808240	0.69896	0.657185	0.662105	0.660045	0.659377	0.6612	0.722853	0.783505	0.773709	0.726184	0.734861	0.754694	0.000114517	0.0164091	0.0828226	37	6	32304143	CGTGCATGGCCTCTTTGGAAACTATGTAATAGGAATGCCAGGGGAGTTGA	F	C6orf10	NM_006781	Body									32304143	32304266	NC_000006.11
cg24727343	0.714944	0.699178	0.729314	0.682775	0.648052	0.705454	0.777466	0.793335	0.760551	0.809767	0.771607	0.763876	0.000248673	0.0210849	0.0828139	37	7	121418840	AGAACAGAAATATATCCACCAACTTCTGTATGAAGTCACCAAGAATACCG	R							TRUE					121418840	121418963	NC_000007.13
cg18399834	0.743976	0.751811	0.718691	0.732045	0.72142	0.701648	0.803779	0.802064	0.811966	0.783186	0.845433	0.819818	2.78e-05	0.0105895	0.0827759	37	2	150442880	TTCAGGTTGGCAGGCAGCAGTCACTTTTCAGTTTTTCAAAGGGGTAGGCG	R	MMADHC	NM_015702	Body									150442880	150443003	NC_000002.11
cg22577120	0.619888	0.59448	0.629967	0.575622	0.66169	0.645913	0.758977	0.652319	0.724964	0.680299	0.702439	0.705058	0.0019954	0.0451774	0.0827494	37	6	110731951	GTATCCCCACCCAAATCACATCTTGCATTGTAGTTCCCATAATCCCTACG	F	DDO;DDO	NM_004032;NM_003649	Body;Body									110731951	110732074	NC_000006.11
cg04781095	0.716513	0.677045	0.761287	0.702483	0.717434	0.748507	0.782595	0.842981	0.782711	0.786234	0.775448	0.84917	0.00123283	0.0376651	0.0826452	37	2	184123747	TCATCTATGTGTTCTCCCCACCCTCTTTCTTTACATTTGATCTGTATTCG	F				chr2:184125343-184125583	N_Shore							184123747	184123870	NC_000002.11
cg07653395	0.545233	0.577969	0.565009	0.607839	0.615354	0.569354	0.672859	0.647814	0.650666	0.666247	0.659238	0.679563	0.000228716	0.0204982	0.0826048	37	8	98518772	GTCTATAATCTCCCCATCCAATGAGTGATGAAAAGCTCCAGAAATGTACG	F							TRUE					98518772	98518895	NC_000008.10
cg09259534	0.77411	0.685265	0.727745	0.735293	0.754295	0.754869	0.815652	0.869824	0.822584	0.76999	0.842321	0.806626	0.00129951	0.038421	0.0825699	37	1	218472841	CGGCTTGCTTTGGCTGCCTTTACAGTACCATTGAAAAACATGAAATCTGT	F	RRP15	NM_016052	Body				TRUE		1:218472760-218473058	Gene_Associated_Cell_type_specific		218472841	218472964	NC_000001.10
cg26544981	0.393	0.371163	0.394698	0.420499	0.433821	0.432153	0.500367	0.470413	0.468502	0.506516	0.458541	0.536332	0.000427737	0.0257659	0.0825563	37	4	188401038	CGACCAGGGCCAACGGATTGAAGGCAGATTTCATCTCAGCCTGAATAATC	F							TRUE					188401038	188401161	NC_000004.11
cg14456143	0.134957	0.0916637	0.139285	0.0703609	0.104369	0.0901938	0.177093	0.197459	0.213385	0.137928	0.200996	0.198988	0.000356592	0.0240418	0.0825034	37	2	17938848	CGGAAGTTGCCAGAGAAAATATGTGCCCTGGCCAACTCCACAGGACTAGT	F	GEN1;GEN1	NM_182625;NM_001130009	5'UTR;5'UTR	chr2:17934555-17935902	S_Shelf							17938848	17938971	NC_000002.11
cg02657654	0.143612	0.0877494	0.137647	0.132079	0.145802	0.140476	0.192611	0.221792	0.233321	0.188419	0.183975	0.26226	0.000468916	0.0266777	0.082502	37	2	45154029	ATCTACATGTGCATGTTTCTAGAATTAATACCCATATGTTCACTGTAGCG	R				chr2:45155195-45157049	N_Shore		TRUE					45154029	45154152	NC_000002.11
cg10541767	0.633141	0.637902	0.627796	0.660208	0.695745	0.662505	0.697574	0.742825	0.756406	0.698819	0.735102	0.78139	0.00077799	0.031918	0.0824699	37	3	142537016	AGATAGCTGCTCCTCTGACAGCAGGCAAAGAACTTCCCTCAGCTATCTCG	R	PCOLCE2	NM_013363	3'UTR									142537016	142537139	NC_000003.11
cg17878273	0.705789	0.673042	0.721842	0.668635	0.668983	0.7572	0.771471	0.777298	0.802786	0.755346	0.798279	0.785057	0.00132202	0.0386206	0.0824577	37	12	45266836	CGGATTATGAAATTGACAAAAGGTGGCCCTTTGGCCATGCATGGAATTTC	R	NELL2;NELL2;NELL2;NELL2;NELL2	NM_001145110;NM_001145107;NM_006159;NM_001145108;NM_001145109	Body;Body;Body;Body;Body	chr12:45269830-45270835	N_Shelf							45266836	45266959	NC_000012.11
cg16928551	0.782225	0.747968	0.742378	0.730227	0.755667	0.74541	0.847009	0.85043	0.831621	0.827022	0.822869	0.81907	5.9e-06	0.0064649	0.0823578	37	6	32847441	CGTCCAGCAGACAAAGACTATGGTTTAATGAAAATAGATGAACCAAGCAC	R	PPP1R2P1	NR_027771	Body	chr6:32847498-32847846	N_Shore							32847441	32847564	NC_000006.11
cg24674368	0.23929	0.223107	0.253833	0.234636	0.210422	0.279381	0.32524	0.282583	0.353452	0.318982	0.303716	0.350399	0.000262187	0.0215966	0.0822838	37	14	97879637	GCTTTCATTTTATTTTCGCTGACTGCAGTCCGGGAGAATGCGCTCGGTCG	R								14:96949382-96949410				97879637	97879760	NC_000014.8
cg16427107	0.298333	0.37497	0.39765	0.407948	0.381046	0.369342	0.440374	0.509229	0.456057	0.445548	0.427942	0.443699	0.00222679	0.0472174	0.0822598	37	15	75912924	TCCTGGCAGCTGTACTGAGCTCTGTGGTTTAGGAACTTGCGAAAGCCACG	F	SNUPN;SNUPN;SNUPN	NM_005701;NM_001042581;NM_001042588	Body;Body;Body				TRUE		15:75912888-75913537	Gene_Associated_Cell_type_specific	TRUE	75912924	75913047	NC_000015.9
cg27641419	0.302821	0.316037	0.325231	0.356727	0.398798	0.332355	0.384229	0.414286	0.400741	0.449296	0.433331	0.443554	0.00106632	0.0357006	0.0822448	37	16	46463126	TTTACCACATTGGCCAGGATTCTCTGGATCTCCGGAGCTTATGATCCACG	R				chr16:46461370-46462886	S_Shore							46463126	46463249	NC_000016.9
cg00197266	0.770602	0.752151	0.710462	0.737082	0.701897	0.712184	0.83486	0.818762	0.840118	0.758887	0.796088	0.828639	0.000635959	0.0295237	0.0821626	37	6	22567723	CGTCTGCAAACAACAGTACAGATTCTATTAAGCAAAGAAGTGTTGTTCCC	R				chr6:22569584-22570705	N_Shore		TRUE					22567723	22567846	NC_000006.11
cg23026906	0.547676	0.596789	0.565672	0.581275	0.574677	0.60108	0.658988	0.660231	0.640112	0.625751	0.646232	0.728631	0.00129524	0.0383733	0.0821294	37	1	207819196	CGCCCAGCCCAGCCCAGGCCAGCCCAGCCCATGGGGCACAGCAGACGCAC	R	CR1L	NM_175710	Body	chr1:207818389-207818952	S_Shore							207819196	207819319	NC_000001.10
cg12841068	0.739956	0.739536	0.718065	0.732342	0.752039	0.776392	0.771766	0.816021	0.861725	0.847018	0.833077	0.821431	0.000491013	0.0271128	0.0821177	37	10	54683341	CGGGAGGCTACTGTATTAATCAAGGTGAGAGAGGATGCTTGTCTGAAGGG	F							TRUE					54683341	54683464	NC_000010.10
cg26243740	0.17116	0.169341	0.20767	0.142592	0.164558	0.189096	0.261143	0.235499	0.287409	0.203982	0.253909	0.295152	0.000849034	0.0329463	0.0821131	37	8	42012513	CTTAATGGAGGCTTTACACAATGGAAACAGGACTACAAAGACACTTTACG	F	AP3M2;AP3M2	NM_006803;NM_001134296	Body;Body	chr8:42009723-42011098	S_Shore		TRUE					42012513	42012636	NC_000008.10
cg10106725	0.442604	0.454502	0.511253	0.447293	0.485568	0.499949	0.550192	0.531356	0.51901	0.572813	0.609558	0.550909	0.000967553	0.0344841	0.0821115	37	4	3071494	CGGGCCCAGCTGCAGACAGAAACCTTTCCCGTCTCATAGGATGGCTGAGG	R				chr4:3075483-3075773	N_Shelf							3071494	3071617	NC_000004.11
cg13603533	0.623817	0.590427	0.644347	0.608043	0.637219	0.598444	0.681804	0.696014	0.748495	0.68102	0.68851	0.699059	0.000135967	0.0171309	0.0821009	37	4	48045040	CGGGGAGATCTGCTGATTGAAGATTAACCTGCAGCAAAAAAGGAAAAGTG	F							TRUE					48045040	48045163	NC_000004.11
cg06254768	0.736157	0.668148	0.701565	0.690367	0.667624	0.751665	0.825557	0.741465	0.810053	0.765436	0.761722	0.803676	0.00188564	0.0441907	0.0820641	37	4	114064176	GGACGCAATTCATAATATCAATATTTAACTGGACTACACTGACCTAAACG	F	ANK2;ANK2;ANK2	NM_001148;NM_001127493;NM_020977	Body;Body;Body				TRUE					114064176	114064299	NC_000004.11
cg01490728	0.701108	0.650668	0.609744	0.691643	0.673492	0.676122	0.774171	0.733522	0.729595	0.715828	0.795721	0.746001	0.00117406	0.0369682	0.0820106	37	9	136565608	CGTCCAAACTAGATATATCTACAGAGAGAGAAAGTAGAGTAGGGTTGCCC	F	SARDH;SARDH	NM_001134707;NM_007101	Body;Body	chr9:136566573-136566896	N_Shore							136565608	136565731	NC_000009.11
cg06617834	0.313398	0.324419	0.270057	0.323021	0.269023	0.300303	0.399233	0.402131	0.408913	0.354098	0.414668	0.313156	0.00249995	0.0493261	0.0819963	37	4	54942790	CGGCTTCCAGTGTTTTGAAGAAATTTCAGATGCATAGCCTTTTGGCCAGG	F							TRUE					54942790	54942913	NC_000004.11
cg16273909	0.131273	0.0821583	0.135084	0.124651	0.114013	0.131166	0.226256	0.191755	0.230366	0.135709	0.208227	0.217921	0.00113439	0.0365291	0.0819814	37	7	116504769	GCCCAGCTTAAGAGCTTATTTTTGAAAATTACCAATAAGGCAGTAGAACG	F	CAPZA2	NM_006136	Body	chr7:116502427-116502920	S_Shore				7:116504604-116504835	Promoter_Associated		116504769	116504892	NC_000007.13
cg08503681	0.357345	0.330237	0.321929	0.287413	0.362722	0.36383	0.454081	0.442442	0.387106	0.417592	0.43563	0.378482	0.000881863	0.0333654	0.0819761	37	5	145895884	TTAGACTTGCTAATGAGCAGCAGCCATGTGCTCCTGCTATCTGACAGTCG	F	GPR151	NM_194251	TSS1500				TRUE					145895884	145896007	NC_000005.9
cg00426709	0.717653	0.714303	0.74953	0.720094	0.710972	0.721851	0.826624	0.767729	0.806788	0.832016	0.780098	0.812993	0.000148522	0.0176935	0.0819741	37	6	100067930	CTTTTTTTTCCAGGGATTTAAACAAGATTAAAAACAATCTTTGACCTTCG	F				chr6:100066405-100067277	S_Shore				6:100067930-100067966	Unclassified_Cell_type_specific		100067930	100068053	NC_000006.11
cg16345720	0.623514	0.54356	0.584701	0.518387	0.547687	0.559621	0.66597	0.628513	0.676206	0.60938	0.653202	0.635727	0.0015316	0.0408002	0.0819215	37	11	64727184	ACCTTATGCAAATCATTTCTCTTCCAGAAGACTAATGATACTAGTATCCG	R	C11orf85	NM_001037225	5'UTR									64727184	64727307	NC_000011.9
cg08883078	0.146426	0.102196	0.127224	0.106207	0.0832929	0.0972027	0.193331	0.183239	0.250199	0.160226	0.145238	0.221819	0.00207844	0.04586	0.0819173	37	2	97291520	CAAAGTGACTCCAAGAATTGAAACATGATCTCTATATTTTGTCAGCTTCG	R	KIAA1310;KIAA1310	NM_001115016;NM_017991	Body;Body				TRUE					97291520	97291643	NC_000002.11
cg01067603	0.712417	0.663627	0.715034	0.698605	0.7031	0.706525	0.781793	0.817721	0.769236	0.749797	0.768703	0.802871	0.000103705	0.0157752	0.081802	37	1	58331989	CGGAGTTCACCCTGTACCTGTGAAGAGGAGCGGTAACAGTAACAACAGTG	R	DAB1;MIR548D2	NM_021080;NR_030385	5'UTR;TSS200									58331989	58332112	NC_000001.10
cg20919730	0.662148	0.690529	0.671324	0.662498	0.655525	0.671412	0.769154	0.721108	0.744138	0.809522	0.740385	0.719864	0.00125285	0.0378838	0.0817891	37	11	105477191	CGAGGGGAGAGTATCTACATAAATTACTTGAAATTTTTGTATTGAAGCAT	R				chr11:105481126-105481422	N_Shelf							105477191	105477314	NC_000011.9
cg23110422	0.678953	0.637086	0.667116	0.629196	0.656017	0.677841	0.708322	0.689669	0.765604	0.747552	0.773942	0.751594	0.0007988	0.0322479	0.0817455	37	21	40182073	AACCAGTTTTCTGGGACCCAGGCCTTTTTTTTCTTTCCTCCTAGAGATCG	F	ETS2	NM_005239	Body	chr21:40177002-40178667	S_Shelf							40182073	40182196	NC_000021.8
cg05279772	0.614322	0.578745	0.603001	0.581537	0.584682	0.605639	0.66736	0.675271	0.640672	0.637115	0.701202	0.736739	0.00210182	0.0460326	0.0817389	37	4	42894337	CGTAACAGGTTCCTTAGGTGCTTGCCAAAGTGATAGAAAATACACTGAGC	F	GRXCR1	NM_001080476	TSS1500									42894337	42894460	NC_000004.11
cg09100373	0.556456	0.524988	0.546252	0.543523	0.506265	0.491971	0.594805	0.602309	0.638111	0.568688	0.61964	0.636169	0.000281833	0.0222094	0.0817111	37	8	127708756	CGGTGTCAGAATGACTGATAGAAGTGCTATAACCCTTCTGAAAATATTAC	R							TRUE					127708756	127708879	NC_000008.10
cg03028061	0.374088	0.371038	0.409919	0.394487	0.429613	0.42268	0.483388	0.487174	0.424026	0.477536	0.504991	0.51483	0.000653649	0.0297947	0.0816867	37	8	218468	CGTGAAACAGCATGGGTTAGGATACTTTTCAAGGATTTTGGTGCCAATTT	F				chr8:216352-216828	S_Shore							218468	218591	NC_000008.10
cg10309957	0.133929	0.0995703	0.128521	0.0980803	0.0847077	0.120042	0.195227	0.211	0.197492	0.134627	0.176944	0.239235	0.00115145	0.0367331	0.0816126	37	1	161735234	CGTGGTCCTAGAAGCATACGTATTCGTCGGTTACAGTATTTTAAATATTC	F	ATF6	NM_007348	TSS1500						1:161735081-161735341	Promoter_Associated	TRUE	161735234	161735357	NC_000001.10
cg21772735	0.663291	0.628223	0.605638	0.5683	0.622166	0.642468	0.722565	0.638906	0.688147	0.705836	0.727346	0.736845	0.0021214	0.0462297	0.0815931	37	8	849830	CGCCACTGAATGTGCTTCTCCAGCCACATGAGCCTGAGATGTGAATACAC	R				chr8:850103-850405	N_Shore							849830	849953	NC_000008.10
cg23881368	0.784721	0.767226	0.755009	0.809518	0.772369	0.804244	0.876486	0.84508	0.824118	0.851368	0.877597	0.907013	0.000361589	0.0241591	0.0814291	37	13	47472343	CGCTGGCGAGCAGGCAGCGGAGAACACAGACCTTAGAGTTCCTTGGTTTT	F	HTR2A;HTR2A	NM_001165947;NM_000621	TSS1500;TSS1500									47472343	47472466	NC_000013.10
cg15034848	0.66369	0.617344	0.658107	0.626103	0.644306	0.700185	0.689994	0.686369	0.777134	0.739929	0.745917	0.758881	0.00202597	0.0454218	0.0814149	37	2	208988453	CGGGAAAAAGTCTCAAAAGAAATTACCCTGTTTGCTCAGTAACTGCTGTA	F	CRYGD	NM_006891	Body	chr2:208988834-208989269	N_Shore							208988453	208988576	NC_000002.11
cg03172098	0.808018	0.730672	0.766076	0.732171	0.780829	0.785933	0.842778	0.836349	0.810763	0.871983	0.880695	0.849572	0.000605051	0.0289914	0.0814068	37	2	33588519	CGGCCTGGGTATGAATGCTACTGTAAGCAAGGGACGTACTATGATCCTGT	F	LTBP1;LTBP1;LTBP1;LTBP1;LTBP1	NM_000627;NM_206943;NM_001166265;NM_001166266;NM_001166264	Body;Body;Body;Body;Body				TRUE					33588519	33588642	NC_000002.11
cg12629991	0.708346	0.700589	0.687689	0.693626	0.694876	0.761751	0.786098	0.795232	0.775799	0.756405	0.827754	0.793928	0.000276951	0.0220962	0.0813901	37	1	164627790	CGGGGATATCAAGCTGCAATCCAGAGAAAAAGCTGTAGTGCCACAGCTTT	R	PBX1	NM_002585	Body				TRUE					164627790	164627913	NC_000001.10
ch.12.1700408R	0.141594	0.128608	0.170194	0.111467	0.121846	0.190678	0.203107	0.218714	0.24877	0.199813	0.227257	0.254847	0.000495329	0.0271743	0.0813534	36	12	85844287	CAGTCAATTGATTTTTTTTTACAAAGGTGCCAAGAACACACATTGGGGAA	F												85844287	85844410	NC_000012.11
cg01133413	0.611943	0.584617	0.633823	0.608899	0.617548	0.651907	0.700139	0.710415	0.724054	0.668206	0.648615	0.744902	0.00130023	0.0384274	0.0812656	37	X	55246758	CGCAGCAACAGATCTGTGCAGCATGCGCACTCAGTGGGGTATTTGCCACG	R	PAGE5;PAGE5	NM_130467;NM_001013435	TSS200;TSS200					X:55263435-55263888				55246758	55246881	NC_000023.10
cg10526795	0.646018	0.659447	0.594281	0.582424	0.554422	0.607174	0.702417	0.720192	0.658051	0.699115	0.688158	0.663423	0.0024137	0.0486868	0.081265	37	1	9326989	CGTGCCTAAGCCTCCCGAGTAGCTGCGACTACAGGCGCCGGCCAGCATGC	F	H6PD	NM_004285	3'UTR	chr1:9324687-9325016	S_Shore		TRUE					9326989	9327112	NC_000001.10
cg25734089	0.616776	0.599009	0.619385	0.687298	0.633454	0.628797	0.675665	0.680951	0.737322	0.71259	0.765919	0.699706	0.00153822	0.0408486	0.0812388	37	19	46969919	CAGTTACAGGCTTTGGTCTCTTCAAGAATCCAATTCACCCCTGGGTTTCG	R	PNMAL1;PNMAL1	NM_018215;NM_001103149	3'UTR;3'UTR						19:46969722-46970016	Unclassified_Cell_type_specific	TRUE	46969919	46970042	NC_000019.9
cg15945209	0.481539	0.411029	0.459349	0.472969	0.474483	0.494138	0.505023	0.540314	0.552177	0.540488	0.553675	0.589039	0.000543182	0.0279364	0.0812015	37	2	133039143	CATCCCACAGTGCCAGTTCTGCTTACCAAAAGTAGCCTACGAAGCACTCG	R									2:133037954-133039344	Unclassified		133039143	133039266	NC_000002.11
cg20473977	0.570733	0.560103	0.569648	0.629723	0.616688	0.598375	0.623244	0.68808	0.646944	0.665282	0.735652	0.67321	0.00230583	0.0478695	0.0811904	37	5	59193490	TGCAAAGTGAAAGTCTCCTTTAAATCTTCCTCCCATTGACTTGAGCAACG	F	PDE4D	NM_001165899	Body	chr5:59189046-59189894	S_Shelf							59193490	59193613	NC_000005.9
ch.12.2920490F	0.195212	0.197907	0.15918	0.107664	0.194588	0.154884	0.266602	0.297474	0.244175	0.217188	0.233842	0.236577	0.00154085	0.0408919	0.0810706	36	12	133222999	CAGTAAGTCCTCACTTAACATCAATGGATTCCTGGAAACTGTGATGGTTA	F	POLE	NM_006231	Body									133222999	133223122	NC_000012.11
cg01424561	0.728778	0.743206	0.717896	0.687795	0.715864	0.748073	0.821991	0.795709	0.778616	0.811213	0.801066	0.819304	4.01e-05	0.0118138	0.0810477	37	7	106481485	GTCCTGTTGCCTCCCTGGGTACTTCCAGAAGCCCGAACCTAAGCCTTTCG	R							TRUE					106481485	106481608	NC_000007.13
cg06543055	0.815303	0.791795	0.797325	0.766064	0.789096	0.820562	0.892909	0.869422	0.91106	0.835106	0.870452	0.887402	0.000157111	0.0179886	0.0810343	37	1	59903010	CGACAGTAACAAAACTGGCCCAGTGGTAGAGCTCTCATCACAGGCCAGGC	F	FGGY;FGGY	NM_018291;NM_001113411	Body;Body				TRUE					59903010	59903133	NC_000001.10
cg11055449	0.570218	0.507404	0.541102	0.55516	0.565008	0.539046	0.593806	0.671322	0.608985	0.620815	0.619923	0.64891	0.000313273	0.0230273	0.0809704	37	10	91136405	CGTATTTTTGTCTGCACTCAGACCTGATTACAGAGTGGCCTTGTATTTTG	R	IFIT1L	NM_001010987	TSS1500									91136405	91136528	NC_000010.10
cg10713626	0.11483	0.128693	0.142495	0.144365	0.13191	0.142951	0.244594	0.204224	0.227698	0.184499	0.249349	0.180405	0.000618573	0.0292325	0.0809207	37	1	145438766	CGGTGGAAGAAAAAAAAAGCTCCAAATCGAGGAAACCCCTTTGCAAAAAA	R	TXNIP;TXNIP	NM_006472;NM_006472	1stExon;5'UTR									145438766	145438889	NC_000001.10
cg14094164	0.694388	0.672058	0.702098	0.661279	0.630814	0.730874	0.778441	0.774321	0.780183	0.710176	0.740723	0.793064	0.00177963	0.043288	0.0808995	37	13	61491000	AAGCTGCTAGAGCCAGGAGTGATGGTAGCATCCTTTCTCTTCTTTCCTCG	R												61491000	61491123	NC_000013.10
cg21836062	0.565501	0.554126	0.606111	0.592337	0.614723	0.577443	0.639233	0.647123	0.657606	0.699355	0.726347	0.625772	0.00222383	0.0471895	0.0808657	37	X	33357661	ATGCAGCTGCTACAACGTCGGTGTGGTAACCACTCTGACTATCTGATACG	R	DMD;DMD	NM_000109;NM_000109	1stExon;5'UTR									33357661	33357784	NC_000023.10
cg17160327	0.469183	0.444214	0.446058	0.440145	0.412623	0.45657	0.50726	0.560546	0.494418	0.497083	0.509393	0.584694	0.00194005	0.0446634	0.0807668	37	6	91885546	GAACAAAAAAGCTGACTCCCTAGCCAGGTGTTCAGCCCTCTTATGATACG	R							TRUE					91885546	91885669	NC_000006.11
cg22356381	0.390935	0.449245	0.429209	0.4323	0.422053	0.420353	0.482412	0.509195	0.503571	0.514188	0.495696	0.523505	1.45e-05	0.00854769	0.0807451	37	12	81026691	AGAGCCCAGCAGCTCACTTGGATGAGCTCTTGTTGCCTCTGAAGTGAACG	F	PTPRQ	NM_001145026	Body				TRUE					81026691	81026814	NC_000012.11
cg24785433	0.539598	0.550612	0.49389	0.510119	0.526184	0.519712	0.615996	0.603096	0.643574	0.57104	0.609248	0.581541	0.000160278	0.0181204	0.0807304	37	8	25286851	CGGTGTGACAGGTATTTAAAGAGGGGAGGCATCACTAAAGCTATTTATAA	F	KCTD9	NM_017634	3'UTR									25286851	25286974	NC_000008.10
cg01046377	0.770664	0.767003	0.756826	0.748586	0.743417	0.755941	0.805561	0.862251	0.842495	0.831603	0.851894	0.832658	2.74e-05	0.0105165	0.0806709	37	7	144049427	CGTAGGAAGATTCAGAGAAAGCACAGGAAGGTGAATATGCCCAAGATTTC	F				chr7:144052115-144052650	N_Shelf							144049427	144049550	NC_000007.13
cg08684893	0.181966	0.0988568	0.132215	0.138911	0.188767	0.146746	0.233343	0.223633	0.281778	0.205566	0.21164	0.215476	0.00114872	0.0367061	0.0806625	37	19	44616615	TGCCTAAGTGATGGCTTCTTAACTCGTATATATTAACAACACTGTATTCG	R	ZNF225	NM_013362	TSS1500	chr19:44617490-44617831	N_Shore							44616615	44616738	NC_000019.9
cg22417678	0.446714	0.428152	0.377882	0.403669	0.440539	0.434204	0.490917	0.522048	0.558844	0.462392	0.475747	0.505144	0.00128415	0.0382382	0.0806551	37	X	147004697	CGTGTAGGGGGACAGAGATAAAAGGATTAAAAGCATCTAACCCTATTTCT	F	ASFMR1;ASFMR1;ASFMR1;ASFMR1;ASFMR1;FMR1	NR_024499;NR_024501;NR_024502;NR_024500;NR_024503;NM_002024	TSS1500;TSS1500;TSS1500;TSS1500;TSS1500;Body									147004697	147004820	NC_000023.10
cg06298701	0.616747	0.554067	0.5731	0.517167	0.582674	0.604566	0.616642	0.629147	0.698001	0.657861	0.661136	0.669407	0.00180245	0.0434872	0.0806456	37	10	51566673	AAATAAATCTCTACAATTACATTATTACCTTTGTGCAAACAGGCATTTCG	R	NCOA4;NCOA4;NCOA4	NM_001145261;NM_001145263;NM_001145260	5'UTR;5'UTR;5'UTR	chr10:51565071-51565648	S_Shore	RDMR						51566673	51566796	NC_000010.10
cg02409364	0.614414	0.684799	0.667523	0.697503	0.605009	0.679388	0.761706	0.711587	0.717233	0.744039	0.780969	0.716672	0.00255886	0.0497625	0.080595	37	20	35199934	CGGGAAAATTGCAAACAACTAAATACCCCTCACCAGGAGCTGGCCCATTA	R				chr20:35201323-35203490	N_Shore	RDMR						35199934	35200057	NC_000020.10
cg12414301	0.681101	0.651759	0.688121	0.721792	0.664834	0.707258	0.755624	0.753703	0.828314	0.751269	0.733813	0.77536	0.000997031	0.0349278	0.0805362	37	5	137224213	AGTTCACTGGCTGTCAGCCTTTTGCGAGGCCTCTCCTGTTCCTCTCATCG	R	PKD2L2	NM_014386	TSS1500	chr5:137224986-137225477	N_Shore				5:137224196-137224623	Unclassified_Cell_type_specific		137224213	137224336	NC_000005.9
cg16935203	0.108339	0.095328	0.118282	0.0862232	0.140101	0.126436	0.170548	0.182216	0.240121	0.163051	0.184925	0.216923	0.000402494	0.0251979	0.0805124	37	11	34608041	CATTCTGGTAAAAAGTCAAGTTTTGTTGCCAACTTTTCCCCCTCTGAACG	R							TRUE		11:34607608-34608766	Unclassified	TRUE	34608041	34608164	NC_000011.9
cg14446658	0.492481	0.506253	0.464046	0.469166	0.511013	0.519497	0.537167	0.58071	0.5557	0.577606	0.566046	0.628258	0.000568296	0.028385	0.0805052	37	5	6845744	CGGAGCAGCTGTCCAAAATTAGATGCTACTGCTCTCATTTGTTGGTTAAA	F						RDMR			5:6845619-6845777	Unclassified_Cell_type_specific		6845744	6845867	NC_000005.9
cg07776698	0.403668	0.383043	0.411582	0.426018	0.43412	0.433859	0.479191	0.490236	0.550036	0.448536	0.494791	0.512444	0.00100897	0.0351232	0.0804906	37	7	120903952	CGATAGTAAAGGACCTTTGAGATCTAGCTTTTAAACTAAATTGCCAGTGT	R	C7orf58	NM_024913	Body				TRUE					120903952	120904075	NC_000007.13
cg24309739	0.56833	0.530608	0.598601	0.576637	0.612585	0.604757	0.612754	0.669418	0.679939	0.631344	0.669829	0.71086	0.00179054	0.0433845	0.080438	37	4	164088478	CGACCGTTTTCACTGCGTCATGTGAACCATTCAAGGCCTGAATGTCGGAT	F	NAF1;NAF1	NM_138386;NM_001128931	TSS1500;TSS1500	chr4:164087461-164088146	S_Shore							164088478	164088601	NC_000004.11
cg14652227	0.399687	0.448459	0.354874	0.409321	0.434817	0.40772	0.530708	0.494267	0.469307	0.510051	0.45512	0.477912	0.00101625	0.0351483	0.0804145	37	2	200604022	CGGGGTGCTCTTATCAACAGGGGGCTAAAACTGCAAGGATGCACACAAAT	F							TRUE					200604022	200604145	NC_000002.11
cg24848192	0.552512	0.518047	0.547044	0.545243	0.519445	0.593213	0.592442	0.625508	0.643212	0.651828	0.640358	0.604311	0.000304914	0.022846	0.0803591	37	22	32600914	CGGGCTTTGTTATCTTGTTCTGATTGGTTATCCTAAGACTTGCTGTCATC	R	RFPL2;RFPL2	NM_001098527;NM_001159545	TSS1500;TSS200								TRUE	32600914	32601037	NC_000022.10
cg04173714	0.145703	0.0951296	0.127272	0.0803825	0.111994	0.130561	0.201444	0.163124	0.228606	0.167253	0.186413	0.226206	0.000385552	0.0248329	0.0803338	37	15	86211321	GGAACCTCAGAGTAGGCATTTGAGCTGCTTGTTTCACTCTGATCTAGACG	R	AKAP13;AKAP13	NM_007200;NM_006738	Body;Body				TRUE		15:86211257-86211535	Unclassified	TRUE	86211321	86211444	NC_000015.9
cg03027241	0.19815	0.249109	0.274128	0.246036	0.225555	0.246338	0.349914	0.318209	0.322668	0.317664	0.308937	0.303847	0.000150594	0.017739	0.0803204	37	20	49620453	CGCACCCGGGGAAGGACACCCTCACTCCCACACCCCGGGAAGAACACTAG	R	KCNG1	NM_002237	3'UTR	chr20:49620446-49620680	Island							49620453	49620576	NC_000020.10
cg12423278	0.692781	0.70149	0.704345	0.635692	0.680184	0.729033	0.748166	0.775559	0.814154	0.755353	0.771699	0.760384	0.000656577	0.0298158	0.0802984	37	5	115989780	CGGCTTTGGCAAGTATTTATGGTTAGGATTGTGTTAGTTGCCACATTAAC	R							TRUE					115989780	115989903	NC_000005.9
cg16641411	0.109409	0.111056	0.133335	0.0761212	0.102248	0.131648	0.196169	0.21807	0.20468	0.154377	0.170201	0.202103	0.000110994	0.0162386	0.0802972	37	2	208396116	CGGGGGTTACCTACTGCATGAGACAAATAATGGATACTTTAATGTCTATT	R	CREB1;CREB1	NM_134442;NM_004379	5'UTR;5'UTR	chr2:208393955-208395024	S_Shore	RDMR						208396116	208396239	NC_000002.11
cg00374101	0.701482	0.640516	0.685552	0.695722	0.664404	0.705838	0.813859	0.719105	0.767968	0.767752	0.788251	0.71833	0.00209884	0.0460091	0.0802921	37	8	87878605	GGCTCATAAAGCAGAACTTCAAGGTCCTCTCTGATAGGTTGAATCCTACG	F	CNBD1	NM_173538	TSS200									87878605	87878728	NC_000008.10
cg06368401	0.695561	0.622486	0.670769	0.606121	0.628484	0.673612	0.728213	0.697639	0.730552	0.712107	0.779082	0.731035	0.00153549	0.0408331	0.0802657	37	3	15914952	CGGAAATTGGGGAGAATAAATAAGCACGACTGTCCAGATTTTACAGACAG	F	MIR563	NR_030289	TSS1500									15914952	15915075	NC_000003.11
cg17996267	0.15979	0.150126	0.130609	0.127704	0.171383	0.17765	0.267056	0.212328	0.205016	0.233237	0.2632	0.217844	0.000203415	0.0197049	0.0802367	37	X	49641598	ACAGAATGCAGGCAGTTGGGGCTATCCTTAGGAGAGACAGCTCTCCTTCG	F	LOC158572	NR_026742	Body	chrX:49643335-49643654	N_Shore				X:49641384-49641805	Unclassified_Cell_type_specific		49641598	49641721	NC_000023.10
cg08035195	0.697825	0.678266	0.730159	0.694345	0.67847	0.75713	0.814793	0.807292	0.786993	0.736831	0.802352	0.769051	0.00101971	0.0352013	0.0801865	37	2	161262014	CGCGGGGACCTGGTTACCATGAGTGACTTTGTGATCTCATCCTGGCTTAG	R	RBMS1;RBMS1	NM_002897;NM_016836	Body;Body	chr2:161263871-161264460	N_Shore		TRUE					161262014	161262137	NC_000002.11
cg27377289	0.476889	0.47866	0.534045	0.484165	0.45363	0.49329	0.557499	0.559747	0.561812	0.536981	0.560677	0.62483	0.000639789	0.0296098	0.0801448	37	7	7812273	CCATTCATCTGTGAAGAATGGCAATGACTGTAAATTGTTCTTCCTGATCG	F							TRUE		7:7812242-7812313	Unclassified_Cell_type_specific		7812273	7812396	NC_000007.13
cg03150409	0.554011	0.598067	0.562639	0.561395	0.614736	0.614057	0.628465	0.652497	0.626869	0.696201	0.71316	0.668509	0.00161843	0.0416643	0.0801329	37	4	1892317	CGCACCCGGCCTATACAAGGTTTTTTATTGAGATGGAGTTTCACTTTCGT	F	WHSC1	NM_001042424	5'UTR									1892317	1892440	NC_000004.11
cg12152193	0.555771	0.55161	0.557023	0.53195	0.521055	0.555213	0.632215	0.645284	0.597685	0.616775	0.611898	0.649506	2.38e-05	0.00998374	0.0801234	37	5	175954583	TAAGACTTTGGGTTCTCCATGGGGGTGGGACCAGGCTGACGGGCCCCACG	R	RNF44	NM_014901	3'UTR						5:175954453-175954612	Gene_Associated_Cell_type_specific		175954583	175954706	NC_000005.9
cg13237945	0.733655	0.721647	0.738532	0.760507	0.797562	0.752192	0.804925	0.826523	0.824933	0.835121	0.865301	0.827919	0.000209114	0.0199334	0.0801047	37	13	43355739	TTCCCCCACTTTTAAAAGCTGCCATTCCTATTCAGTGTAGTTTTCTTACG	F	C13orf30;C13orf30	NM_182508;NM_182508	1stExon;5'UTR									43355739	43355862	NC_000013.10
cg16365445	0.767708	0.716639	0.782176	0.737694	0.767469	0.787351	0.850338	0.80723	0.849886	0.839534	0.81868	0.873946	0.000322109	0.0232674	0.0800959	37	10	33230686	CAAGTAAGCAGCAGATCCCTCATAGCTACCTTCTAATCATTGTTTGTTCG	F	ITGB1;ITGB1	NM_002211;NM_133376	5'UTR;5'UTR				TRUE					33230686	33230809	NC_000010.10
cg03799230	0.723663	0.694765	0.684984	0.706135	0.674777	0.730675	0.770204	0.76426	0.806106	0.780974	0.777085	0.796913	4.43e-05	0.0120021	0.0800904	37	11	80184550	AGGAAACCCCCAAAACTATGTTCTCAGCATAACTATTAGAAAGATCTACG	F							TRUE					80184550	80184673	NC_000011.9
cg12311837	0.633043	0.642248	0.668362	0.668982	0.624869	0.701444	0.721487	0.714454	0.767554	0.757561	0.754392	0.703942	0.000514822	0.0274468	0.0800737	37	4	164391778	CGGGTAGTAGCAGATGAGGAGAGCCTGGTTTCTCTAATTCCCAGGTTAGT	F				chr4:164394674-164395062	N_Shelf							164391778	164391901	NC_000004.11
cg05233670	0.593671	0.576756	0.534124	0.506564	0.540712	0.540569	0.61383	0.602412	0.652032	0.65651	0.66227	0.585724	0.00143081	0.0398925	0.0800636	37	12	109058033	CGTGAGAAAAAGAATTTTCCTTTGTGGGAACTTTAAAGAAGGAGACAAAC	F	CORO1C	NM_014325	Body				TRUE					109058033	109058156	NC_000012.11
cg26275355	0.643721	0.640651	0.673107	0.642488	0.682954	0.701515	0.72774	0.752595	0.795978	0.693289	0.752899	0.742203	0.00112667	0.0364503	0.0800448	37	4	12252318	CGAGAGCACCAACATGTAGACAGGAAGAAAGAGTGAGAGAGATAACACAG	R							TRUE					12252318	12252441	NC_000004.11
cg02630207	0.104962	0.12237	0.089492	0.148507	0.0818381	0.104273	0.213712	0.218379	0.19647	0.170213	0.162691	0.170045	0.000187666	0.0191214	0.0800113	37	2	45839653	CGACCAAGAGTAGGAACCAGATACAGCCAGAGGAAACAGACACCCAAGCA	F	SRBD1	NM_018079	TSS1500	chr2:45838292-45838582	S_Shore							45839653	45839776	NC_000002.11
cg24990564	0.726235	0.761769	0.732641	0.787735	0.784188	0.744723	0.783883	0.817223	0.847783	0.831999	0.886407	0.849961	0.00131096	0.0385165	0.0799941	37	6	32095063	GAAGAGTCCAAAAAGTACCCAAGGACATGTCGGTGGGGATTCCTGTACCG	R	ATF6B;ATF6B	NM_004381;NM_001136153	Body;Body	chr6:32097820-32098086	N_Shelf	RDMR						32095063	32095186	NC_000006.11
cg23716866	0.182656	0.17124	0.177395	0.179682	0.140228	0.166785	0.250706	0.213033	0.264578	0.270083	0.214521	0.284922	0.000499653	0.027239	0.0799759	37	6	46048847	TCCAGACCTGGGCTTATTGCACTAAGAAAACTTTAAATAGTTTTTCCTCG	F	CLIC5	NM_001114086	TSS1500									46048847	46048970	NC_000006.11
cg14734614	0.366789	0.371621	0.380779	0.327179	0.362609	0.367544	0.416337	0.442628	0.453448	0.480273	0.456921	0.406591	0.000240038	0.0208509	0.079946	37	19	51473346	CTTCTTTCTTTCCTTCCTTCTTTTCTTTCTTTCTTTCTTTTTTTTTGACG	R	KLK6;KLK6;KLK6	NM_001012964;NM_001012965;NM_002774	TSS1500;TSS1500;TSS1500									51473346	51473469	NC_000019.9
cg26487582	0.70803	0.679643	0.718172	0.667506	0.684293	0.721834	0.787219	0.747313	0.769304	0.738768	0.833699	0.782772	0.0010604	0.0356484	0.0799329	37	4	25322200	CGAATAAGGGGGGAAAGCTGAGTAATCTTGAGTGCTTCATATTCTCATGT	F	ZCCHC4	NM_024936	Body				TRUE					25322200	25322323	NC_000004.11
cg07535316	0.718623	0.718433	0.75726	0.695131	0.717055	0.750138	0.784292	0.807725	0.806542	0.772113	0.843359	0.821907	0.000216686	0.0202332	0.079883	37	7	81752694	CGTGGGTGATGTATAAGCTTGTTAAACTTTGAGTCCTAAGTTTCTGCTGA	R	CACNA2D1	NM_000722	Body				TRUE					81752694	81752817	NC_000007.13
cg22298470	0.646268	0.695403	0.628776	0.642849	0.655295	0.654169	0.752772	0.743303	0.766891	0.700986	0.714627	0.723314	0.000173468	0.0186153	0.0798556	37	19	12101959	TGCACCCATCACTGGAGCAGTATACACTGAACCCAATTTGTAGTCTTTCG	F				chr19:12098571-12098950	S_Shelf							12101959	12102082	NC_000019.9
cg02388795	0.707235	0.686882	0.687256	0.700387	0.763963	0.717792	0.811984	0.787777	0.758102	0.787716	0.838947	0.75801	0.00100622	0.0350865	0.0798371	37	12	76474635	CGTTTGTGAGGGTGGAGCCCTCATGATCCAATCACTTCTTAAAGACCCCC	R	NAP1L1;NAP1L1	NM_139207;NM_004537	5'UTR;5'UTR	chr12:76477717-76479131	N_Shelf				12:76474400-76475407	Promoter_Associated_Cell_type_specific		76474635	76474758	NC_000012.11
cg14763096	0.131849	0.192173	0.152707	0.16493	0.164491	0.17028	0.19369	0.223598	0.273119	0.253432	0.230572	0.280312	0.00085369	0.0330094	0.0797156	37	10	95954251	TTGTGCAGAGTCTTTGCCTCTTCCTGTACAATCCAACAGTGAGTCATCCG	F	PLCE1;PLCE1	NM_001165979;NM_016341	Body;Body				TRUE					95954251	95954374	NC_000010.10
cg22716738	0.106295	0.118349	0.0965319	0.0622147	0.0779921	0.0961971	0.163198	0.185709	0.218507	0.108942	0.157129	0.202381	0.00246644	0.0491057	0.0797142	37	7	27784932	CGCACGGGAGTGGAGAAATAATATGCAAAGTCACTGCATCACCTTGTGGT	R	TAX1BP1;TAX1BP1	NM_006024;NM_001079864	5'UTR;5'UTR				TRUE					27784932	27785055	NC_000007.13
cg10129938	0.646612	0.687389	0.670914	0.626211	0.705944	0.626621	0.72834	0.70903	0.714071	0.78144	0.753726	0.75529	0.0011793	0.0370377	0.0797012	37	15	59243881	CGCTCTGAAACTTCAAATAGGCTTGTTGAAGCCATATGAACTGTAATCCA	R							TRUE					59243881	59244004	NC_000015.9
cg23359089	0.752378	0.725105	0.78454	0.734548	0.729943	0.813717	0.831966	0.833327	0.821282	0.832461	0.853551	0.845531	0.00188735	0.0441983	0.0796478	37	11	20999850	CGCGGTGACTATCATAGAGTACATGCTGAGGAAATACTGGCTGTCGACAA	R	NELL1;NELL1	NM_006157;NM_201551	Body;Body									20999850	20999973	NC_000011.9
cg26151839	0.53563	0.556215	0.522247	0.515395	0.519915	0.571285	0.600028	0.637342	0.671393	0.575538	0.592897	0.621285	0.00122162	0.0375006	0.0796328	37	6	130322354	GGGCCACTCACTTCTTTTTCATGGCCTGCTTTATTCATTGGTATTACCCG	R							TRUE					130322354	130322477	NC_000006.11
cg11390763	0.451634	0.497974	0.528417	0.528147	0.510201	0.501466	0.582251	0.616076	0.599684	0.520042	0.59544	0.582106	0.00125773	0.0379403	0.0796268	37	X	100648809	TTATTTCCTTATGTTTTTCTAATGTCCTTTTTCTGTTCTAGGACCCCACG	F	RPL36A	NM_021029	Body	chrX:100645780-100646107	S_Shelf							100648809	100648932	NC_000023.10
cg20385229	0.692954	0.61322	0.641557	0.637973	0.643263	0.673116	0.769644	0.731039	0.701111	0.720621	0.727042	0.730054	0.000356092	0.024031	0.0795712	37	14	78175470	CGGGAGAGGCCTAGTCTACAGATAAAGGTTGGAATAATTAGTTCTGAAAT	F	ALKBH1;C14orf156	NM_006020;NM_031210	TSS1500;Body	chr14:78174054-78174550	S_Shore							78175470	78175593	NC_000014.8
cg03741419	0.147533	0.152761	0.127254	0.127881	0.121516	0.134029	0.250853	0.23736	0.179874	0.2007	0.237111	0.182315	0.000798772	0.0322479	0.0795397	37	X	62781690	CGCATAACTTTGTAAAGGGCAGAGCCAGATTGCAACCAAGTTAACGTCTT	R	LOC92249	NR_015353	TSS1500									62781690	62781813	NC_000023.10
cg14640174	0.41906	0.410478	0.439785	0.473024	0.477484	0.462191	0.493833	0.498852	0.502794	0.518339	0.568895	0.575213	0.00204244	0.0455663	0.0793175	37	9	119581363	CGTGTCTTTTGAATCCACGGTTCCCTGTAATGTGCTGTGGATGGAAGGTG	F	ASTN2;ASTN2;ASTN2	NM_198186;NM_014010;NM_198187	Body;Body;Body				TRUE					119581363	119581486	NC_000009.11
cg09154826	0.36724	0.383892	0.387805	0.410742	0.441487	0.425862	0.468018	0.447627	0.475393	0.466825	0.50167	0.533278	0.000881718	0.0333625	0.0792973	37	1	200635573	GACAGCCATCCTTCTGAAGAGCCCGTTAAGTCATTTTCCAAAACACAGCG	F	DDX59	NM_001031725	Body	chr1:200638546-200639384	N_Shelf							200635573	200635696	NC_000001.10
cg06259050	0.690721	0.670503	0.691186	0.690043	0.709882	0.696345	0.775655	0.79959	0.757048	0.753525	0.793446	0.744888	7.27e-05	0.0140404	0.0792454	37	4	122790713	TAAGCTAGATGCACATTAAACTGTTGTCATTGCTTTTTTTCCCCCTTTCG	R	BBS7;BBS7	NM_018190;NM_176824	Body;Body	chr4:122791200-122791835	N_Shore							122790713	122790836	NC_000004.11
cg27488740	0.461338	0.454118	0.491817	0.435333	0.435066	0.472836	0.512691	0.515486	0.528191	0.529861	0.55902	0.580636	0.000258026	0.0214574	0.0792295	37	2	78928852	GATCAGAGTAGTGGTATTACACCGGCAGCCCTCAAGGCGGGCAGACCCCG	F								2:78782286-78782460	2:78928824-78929047	Unclassified		78928852	78928975	NC_000002.11
cg11939300	0.795676	0.76645	0.792893	0.784835	0.756069	0.78607	0.861897	0.812707	0.84276	0.887166	0.862797	0.889841	0.000415691	0.0255386	0.079196	37	2	132584904	AGTTTTATAACCATCTGGCATTTCCCCGGCTTGCTCCTCTCTCTCTCTCG	R				chr2:132585112-132588283	N_Shore							132584904	132585027	NC_000002.11
cg04683035	0.654268	0.691017	0.630928	0.672259	0.689011	0.691108	0.725777	0.798069	0.785592	0.720838	0.725912	0.747297	0.00110918	0.0362117	0.0791488	37	7	158712832	CGGAGGCCACATGCTGTGGTACACACACACACTTCACATGTTCTCTGACG	F	WDR60	NM_018051	Body	chr7:158712559-158713094	Island			7:158405321-158406086				158712832	158712955	NC_000007.13
cg10948671	0.585955	0.549299	0.526025	0.517425	0.598732	0.571721	0.636338	0.657497	0.647457	0.62439	0.637876	0.620157	0.00109067	0.0360196	0.0790932	37	10	45644227	CTGAAGGAAACTTTACTTCTCCTGGCTATGATGGAGTCAGGAATTACTCG	R	LOC100133308	NR_024472	Body									45644227	45644350	NC_000010.10
cg27227663	0.681748	0.658822	0.732355	0.74746	0.684221	0.671531	0.782984	0.754913	0.750581	0.783667	0.827339	0.750992	0.00201963	0.0453606	0.0790567	37	11	123626544	AGAGAAGTATTTGAATTTGCACTAATGGCCAATATAACTGGCCACGAACG	R	OR6X1	NM_001005188	TSS1500									123626544	123626667	NC_000011.9
cg11128212	0.632341	0.610463	0.643407	0.639717	0.639403	0.670461	0.708481	0.67271	0.717863	0.71197	0.736432	0.762536	0.000502187	0.0272433	0.0790333	37	12	46068618	CGCTGAAGAATTTTAAGCGATGAAGTAACATGATTATATTTATATTTCAA	F							TRUE				TRUE	46068618	46068741	NC_000012.11
cg17798857	0.151394	0.123541	0.135429	0.136026	0.138171	0.145449	0.220672	0.227287	0.265283	0.185702	0.179218	0.22588	0.00111605	0.036305	0.0790055	37	15	70994632	CGCTGCAGTGCATGATAAAACTGTCCACATCCGAATTGTCCGGTAAACAG	F	UACA;UACA	NM_018003;NM_001008224	Body;TSS200				TRUE					70994632	70994755	NC_000015.9
ch.X.397055F	0.121929	0.0958268	0.115592	0.0855405	0.0945319	0.110399	0.195159	0.173914	0.214099	0.128488	0.172962	0.213048	0.000965364	0.0344472	0.0789753	36	X	24089926	CAGTTAACATGAAATTAAGAAAAAAAGAAAAGGTAAATAAATTTGACCTC	F	EIF2S3	NM_001415	Body									24089926	24090049	NC_000023.10
cg01238234	0.834014	0.770941	0.826779	0.805486	0.753488	0.787753	0.870654	0.876574	0.876321	0.873468	0.870395	0.884832	0.00147365	0.0402375	0.0789638	37	14	62461969	CGGGAGGTTGGAACATAGACAAAAGCAATGAGATTCCAGGGACATGTCTT	F	SYT16	NM_031914	TSS1500				TRUE					62461969	62462092	NC_000014.8
cg15845673	0.121806	0.116755	0.105937	0.103798	0.17926	0.135758	0.198542	0.240124	0.217602	0.172138	0.158604	0.249721	0.0021042	0.0460489	0.0789031	37	12	25099560	CGCATGCGCAGGAGTAATTATTTAAAGACATTTTGTTCCTGACTAACTGC	R	BCAT1	NM_005504	Body	chr12:25101607-25102073	N_Shelf							25099560	25099683	NC_000012.11
cg07974627	0.254827	0.29636	0.278476	0.339815	0.31249	0.328664	0.394904	0.396659	0.364455	0.379962	0.423453	0.324292	0.00197339	0.0449409	0.0788489	37	19	58171878	CGGTAGAAAAATGTTCAGAGTCTTCTGCTGATGACAGAATGTGGAGACAT	R				chr19:58175623-58176104	N_Shelf							58171878	58172001	NC_000019.9
ch.1.1103899F	0.117784	0.0911137	0.130376	0.0902678	0.0883122	0.121887	0.19466	0.17081	0.209364	0.153283	0.165174	0.219264	0.000205463	0.0197599	0.0788027	36	1	34233064	CAGCACATTATATAGGGCATGACACCATGAGATTGTCCCTTTAACCTTAG	F	CSMD2	NM_052896	Body									34233064	34233187	NC_000001.10
cg21937244	0.734702	0.658486	0.710167	0.694678	0.699012	0.736232	0.809876	0.764055	0.806795	0.804129	0.772642	0.748386	0.000592529	0.0288246	0.0787677	37	14	103406412	CGCTTGATCTACTTCAAGAGCAAGTTCTCGGGTGAGCCTTCCTCTGCACC	R	CDC42BPB	NM_006035	Body	chr14:103406206-103406683	Island			14:102475487-102476542				103406412	103406535	NC_000014.8
cg20801464	0.127868	0.0802964	0.103227	0.0609201	0.0643054	0.0953788	0.218614	0.13731	0.202668	0.144471	0.152753	0.148399	0.0013633	0.0391545	0.0787034	37	18	3454953	CGGTGTTTAGCTTAAGAGGAATATTCCGTGTTTATTTCCTGTCAAGGGGA	F	TGIF1;TGIF1;TGIF1;TGIF1;TGIF1;TGIF1;TGIF1;TGIF1	NM_174886;NM_173208;NM_173210;NM_170695;NM_173209;NM_003244;NM_173207;NM_173211	5'UTR;Body;5'UTR;Body;5'UTR;Body;Body;5'UTR	chr18:3448006-3452360	S_Shelf				18:3454068-3455192	Promoter_Associated_Cell_type_specific		3454953	3455076	NC_000018.9
cg07950469	0.605875	0.58382	0.635581	0.600397	0.630243	0.681226	0.686992	0.727015	0.732803	0.677774	0.692755	0.691834	0.00130067	0.038431	0.0786717	37	16	71265941	TTCAATGTTTCCCCACAGCACTTACAGTCTAAATCATTCAATTCTGCACG	F	HYDIN;HYDIN	NM_017558;NM_032821	TSS1500;TSS1500	chr16:71264360-71264659	S_Shore							71265941	71266064	NC_000016.9
cg03768717	0.59821	0.597908	0.616167	0.609842	0.625329	0.618246	0.678659	0.667449	0.676162	0.692882	0.72652	0.695933	5.29e-05	0.0125096	0.0786506	37	12	131787828	GTGGTGAGATCATGACACGTCTCAGAGCACAGACAATCCCACCACAAACG	F				chr12:131783093-131784199	S_Shelf							131787828	131787951	NC_000012.11
cg17656608	0.678257	0.639918	0.68228	0.653136	0.662752	0.684757	0.740895	0.797956	0.719066	0.732153	0.723063	0.75943	0.000468639	0.0266737	0.078577	37	5	139486020	CGCAGAGGACTAGAAAAGGTTTGAGTCTGAAATTATCTGGCACAGAGGAT	R				chr5:139486931-139487672	N_Shore	RDMR						139486020	139486143	NC_000005.9
cg18471235	0.493556	0.482436	0.465795	0.43606	0.459363	0.533586	0.538344	0.566747	0.564995	0.563869	0.532397	0.575876	0.00112512	0.0364317	0.0785719	37	11	2922395	TGGGCATCAGAAAACAATACCCCAAAATGAAGGCCTCAGAAGCAGCTTCG	F	SLC22A18AS;SLC22A18;SLC22A18	NM_007105;NM_183233;NM_002555	5'UTR;5'UTR;TSS1500	chr11:2923301-2923817	N_Shore							2922395	2922518	NC_000011.9
cg09793619	0.727694	0.716887	0.759759	0.759938	0.71268	0.797056	0.789463	0.84365	0.80488	0.845396	0.834058	0.82776	0.000916932	0.0337952	0.0785319	37	10	131650331	AGCTAGAATAGCCGGGAATCACATTCCATGCCAAATGAGGCAAGCAGTCG	R	EBF3	NM_001005463	Body					10:131540321-131540404				131650331	131650454	NC_000010.10
cg16581455	0.448628	0.489473	0.470584	0.527498	0.49609	0.518649	0.588802	0.54287	0.578557	0.559416	0.528227	0.624051	0.00180623	0.0435233	0.0785004	37	8	94857684	CGTGGTGATCTCAGCATGAATGACCCAGCAGATGTGTACAAGACAAGCCT	R							TRUE					94857684	94857807	NC_000008.10
cg24479137	0.48659	0.424002	0.486216	0.495049	0.48082	0.442876	0.57059	0.553827	0.495907	0.542599	0.53831	0.585284	0.0010612	0.0356606	0.0784939	37	1	239699220	CGGGCTGCCTTCAAGGTATGGTTCAGAATCAAACTGCAACACCCTGTACC	R												239699220	239699343	NC_000001.10
cg17449759	0.252435	0.242937	0.240302	0.228079	0.218314	0.223095	0.275688	0.278943	0.330503	0.290642	0.34222	0.358039	0.00187251	0.0440975	0.0784791	37	1	168466986	CGACCTACAAAACAAATAGTGGTTCAGAGGGAAAGGTGGAAGGGCTCATG	F							TRUE					168466986	168467109	NC_000001.10
cg22974210	0.736415	0.702348	0.739608	0.729986	0.767431	0.726866	0.811941	0.80628	0.83617	0.799594	0.826911	0.792629	4.04e-05	0.011843	0.0784783	37	3	123171194	GGTGCCACCCATGTCATATCTGCTACATTGCTGCATGGTAGAATACAACG	F				chr3:123166218-123168567	S_Shelf							123171194	123171317	NC_000003.11
cg25697357	0.715902	0.703312	0.747671	0.754913	0.728308	0.758774	0.822398	0.790185	0.755574	0.846311	0.811287	0.853413	0.00186241	0.0440198	0.0783813	37	20	13979928	CGTGAAGCCCTATGAAAGAAAAGTGACTCTAAGGTGGAAGAGATCCGAGC	R	MACROD2	NM_080676	Body	chr20:13975768-13976287	S_Shelf							13979928	13980051	NC_000020.10
cg06578832	0.662651	0.587463	0.672353	0.605872	0.609187	0.655642	0.682403	0.711658	0.733082	0.713843	0.713143	0.709301	0.00172385	0.0427549	0.0783768	37	2	50177625	CGCATAGATGAGGTGCTTTGTATTCATTGTTGAGTAATTGGGCCTCACTG	R	NRXN1;NRXN1;NRXN1	NM_004801;NM_001135659;NM_138735	Body;Body;Body				TRUE					50177625	50177748	NC_000002.11
cg18949521	0.348343	0.345968	0.400639	0.38627	0.365501	0.417644	0.452771	0.456453	0.446081	0.445961	0.481257	0.452045	0.000538711	0.027869	0.0783673	37	6	29324300	CGGCATTTTCTTGGGGATGTGTGAACTTGTGCTGTAGAATGCGATTTCTA	F	OR5V1	NM_030876	TSS1500									29324300	29324423	NC_000006.11
cg13833328	0.646994	0.58403	0.616875	0.636051	0.634425	0.674115	0.738552	0.696422	0.707072	0.707918	0.716513	0.696163	0.000601944	0.0289475	0.0783586	37	6	24357098	CGACTGTCTGTCTCCAGCAACGTGATTAGACCTTCAAGGGCAGGGGTCCT	R	DCDC2;KAAG1	NM_016356;NM_181337	Body;TSS200	chr6:24357719-24358309	N_Shore							24357098	24357221	NC_000006.11
cg13917578	0.792466	0.817751	0.82177	0.801451	0.773677	0.829661	0.876788	0.907832	0.912516	0.845119	0.882052	0.882562	0.000147341	0.0176481	0.0783485	37	5	143547850	CGTGGACAGGACAGAAAAGAAAAGAAAAGCAGAGGCAGATAAATCTCGTA	F	YIPF5;YIPF5	NM_030799;NM_001024947	Body;Body	chr5:143549939-143550333	N_Shelf							143547850	143547973	NC_000005.9
cg05279513	0.0900972	0.0666633	0.0967107	0.0625247	0.0795486	0.078431	0.189684	0.160373	0.162034	0.0981442	0.137448	0.196051	0.00210943	0.046095	0.0782931	37	11	9880619	TTCATTTTCCTTCCCTCTGTTGTTAATCACCTCTTAAGTTTACTCTTACG	F	SBF2	NM_030962	Body				TRUE					9880619	9880742	NC_000011.9
cg23575349	0.688863	0.68569	0.677612	0.70914	0.654061	0.735599	0.793459	0.78095	0.751585	0.744965	0.747131	0.802387	0.000486616	0.027016	0.0782517	37	11	88800388	TAAATGTCTCATACAAAAACCCAAATTTGACCTTATCTTTATTGTTAACG	F												88800388	88800511	NC_000011.9
cg16895486	0.583782	0.526475	0.514995	0.574501	0.508542	0.522401	0.593188	0.588035	0.582819	0.645675	0.633516	0.656961	0.00185984	0.0439911	0.0782499	37	8	26614263	TGGGTTTCATGCTCCCCTTCCTTGGGCAGTAAGGACAACAGTCGTGGACG	R	ADRA1A;ADRA1A	NM_033302;NM_033303	3'UTR;Body									26614263	26614386	NC_000008.10
cg10744588	0.579467	0.603291	0.652376	0.58863	0.614374	0.602459	0.656128	0.727521	0.671481	0.697817	0.677237	0.679297	0.000309795	0.0229487	0.0781472	37	11	49838266	CGTAGTATTCTAGAAAGATATTACTCCTCAGGTCACAGGGGATGTACACC	F				chr11:49839280-49839568	N_Shore							49838266	49838389	NC_000011.9
cg10864394	0.673723	0.642955	0.68592	0.627065	0.63158	0.631413	0.708874	0.689875	0.756474	0.715696	0.709417	0.781203	0.00145168	0.0400487	0.0781472	37	11	102714882	TTCTATTCTGCCCATGAGGTTTTCCTCCTCAAGAACCAGCAAATCCAACG	F	MMP3	NM_002422	TSS1500									102714882	102715005	NC_000011.9
cg05535809	0.733321	0.73511	0.783385	0.771632	0.77447	0.775979	0.844881	0.829129	0.842917	0.855468	0.846144	0.823509	7.88e-05	0.0143748	0.0780253	37	5	117645500	CGGGTTCTAAAGAGCCGTTCCATTCTGGAAAAGGGAATAGAAAAAGCCAC	R							TRUE					117645500	117645623	NC_000005.9
cg25601040	0.401814	0.46453	0.469598	0.399906	0.43477	0.403493	0.476221	0.501207	0.517186	0.492852	0.514263	0.540174	0.000898379	0.0335776	0.0779654	37	4	13540236	TCGGCCTGAATCCTTGGGACCAATTTCAGTGCAAGTGACATGATGTTCCG	R				chr4:13543562-13546494	N_Shelf			4:13149198-13149584				13540236	13540359	NC_000004.11
cg09110241	0.79851	0.795207	0.86948	0.808481	0.838924	0.824755	0.897664	0.897516	0.902609	0.89171	0.882977	0.930379	0.000388393	0.02492	0.0779164	37	2	227079364	GGACATGCCCTTTGATAGTTACTCTATTCTGCATCATGGCCTCCCACTCG	F							TRUE					227079364	227079487	NC_000002.11
cg23979401	0.0853592	0.0706054	0.07201	0.0670794	0.100443	0.0581111	0.14191	0.18059	0.188755	0.104318	0.142206	0.163229	0.000751429	0.0314825	0.0779001	37	5	76435488	CGGAAGTAAAAATGGAAAAACAATGAATGAAAGTTTAAGATCACAAAAGA	R	LOC728723	NR_024398	Body				TRUE					76435488	76435611	NC_000005.9
cg10774716	0.559257	0.62274	0.640926	0.603275	0.606952	0.632703	0.655584	0.738763	0.654513	0.670851	0.685066	0.728421	0.00244971	0.0489876	0.0778908	37	3	167101927	CCACTTGCTCTATTTTTACATTGCCACCAGAATTACCCTTGAAAGATGCG	F				chr3:167097927-167098198	S_Shelf							167101927	167102050	NC_000003.11
cg19405329	0.656594	0.613715	0.626431	0.640135	0.634504	0.659154	0.729026	0.693912	0.753739	0.705366	0.713151	0.70268	5.79e-05	0.0129103	0.07789	37	15	49440632	CGCCAGCAATGAGGAAGGGCAGCTGAAATAAAGCAATTAACATGCAAATG	F	COPS2;COPS2	NM_001143887;NM_004236	Body;Body				TRUE					49440632	49440755	NC_000015.9
cg06680852	0.123744	0.0803228	0.123009	0.0726474	0.0882845	0.129833	0.178644	0.13889	0.189319	0.194602	0.159086	0.22463	0.000683011	0.0302769	0.0778886	37	10	22722951	GTCACATTCTTTTAAATGACATCATCAGTGATAGCAAATCTTCCTCCTCG	F				chr10:22725491-22726764	N_Shelf						TRUE	22722951	22723074	NC_000010.10
cg05033239	0.113073	0.0722686	0.0999602	0.0650167	0.111701	0.102057	0.192316	0.154358	0.192737	0.123482	0.202771	0.165304	0.0005632	0.0282919	0.0778152	37	5	90458832	TTTTTCTTTCATATTTCTAGAGAACAATGTTCTTTTCTTTTGTAATAACG	F	GPR98;GPR98	NR_003149;NM_032119	Body;Body				TRUE		5:90458591-90458895	Unclassified		90458832	90458955	NC_000005.9
cg04779780	0.770767	0.749374	0.781475	0.793429	0.777736	0.757112	0.83141	0.841305	0.861926	0.844038	0.862577	0.855076	4.86e-06	0.00622789	0.07774	37	10	29347455	ACCACCCCTCACTCTGCAATAACCAGAGGAAGCAATTTACATTTTATACG	F							TRUE					29347455	29347578	NC_000010.10
cg08574227	0.559411	0.530652	0.558604	0.539724	0.549746	0.558985	0.629841	0.592648	0.673474	0.631881	0.633625	0.60189	0.000538473	0.027869	0.0777065	37	4	52944959	CGTTGACACCATCTTATGTGGGGTCGAATGACTTTGAGAATGCTGTCTTG	F	SPATA18	NM_145263	Body	chr4:52942978-52943248	S_Shore							52944959	52945082	NC_000004.11
cg03568607	0.581818	0.60106	0.637093	0.57873	0.57674	0.621744	0.628835	0.661577	0.684512	0.704918	0.682692	0.700887	0.000537688	0.0278683	0.0777058	37	13	110106992	CGTTAATTTGGGTGATCAGAAAAGCAGACATTACCTCCTCCTGTCAATCG	R							TRUE					110106992	110107115	NC_000013.10
cg13948772	0.545523	0.511537	0.520889	0.481956	0.584479	0.529937	0.581079	0.608133	0.635965	0.584801	0.598134	0.632293	0.00142679	0.0398651	0.0776805	37	1	87220444	CGGGTGTTGGGGACCTCAAGTTTGCAGAAAATGGTGTTAAAATTAGCTAG	R							TRUE					87220444	87220567	NC_000001.10
cg26640424	0.44953	0.527508	0.514436	0.5034	0.509248	0.46372	0.5383	0.595533	0.616512	0.523363	0.576058	0.584149	0.00234927	0.0481901	0.0776789	37	2	134956853	CGGAACAGGAAAACACACTGCCCTCTTATCAGAGGAGTAGGAGAGGCAAA	R							TRUE					134956853	134956976	NC_000002.11
cg19678315	0.393904	0.328197	0.368327	0.338344	0.34008	0.416599	0.438912	0.470423	0.40192	0.415963	0.444787	0.479447	0.00221497	0.0470937	0.0776667	37	6	168760112	TGTTTGAGCATGGTTTGAACAGTTGGCCACCTTTGACTGGCCAAAACTCG	F								6:168502961-168503148				168760112	168760235	NC_000006.11
cg13669188	0.835896	0.807368	0.789733	0.743569	0.764592	0.828154	0.82521	0.883879	0.887798	0.863534	0.873447	0.9014	0.00206402	0.04576	0.0776595	37	9	139984628	CGGTGTCGGGGATTTGGCTGTTCTTCCTGAACCAAACCTTCACTGACAGG	R	MAN1B1	NM_016219	Body	chr9:139980377-139981887	S_Shelf				9:139984008-139985336	Unclassified_Cell_type_specific		139984628	139984751	NC_000009.11
cg26365742	0.691424	0.711284	0.754209	0.716178	0.699071	0.76786	0.793536	0.785575	0.825876	0.804205	0.789786	0.80677	0.000773267	0.0318365	0.0776204	37	7	87503866	TCTGCCACCTACTCAAATTACCCTTAAGGAAACCAAGGATACCTGAAACG	R	SLC25A40	NM_018843	5'UTR	chr7:87505100-87506493	N_Shore				7:87503350-87504097	NonGene_Associated		87503866	87503989	NC_000007.13
cg11174640	0.132597	0.148545	0.150249	0.161163	0.11426	0.15396	0.209697	0.222557	0.247935	0.211232	0.273087	0.161936	0.00257791	0.0498911	0.0776115	37	6	27259237	GCTGTGAACCTGGCTCCCTCCGAAGCATGGCAAAGTTCCACTTAAGGACG	R				chr6:27258958-27259163	S_Shore							27259237	27259360	NC_000006.11
cg10279872	0.761619	0.721075	0.741297	0.7165	0.74901	0.758473	0.805292	0.80602	0.842693	0.808053	0.799448	0.852029	8.03e-05	0.0144235	0.0775936	37	8	120118684	CAAATACCAAGAGAACAACTCATTTGACATATAGACAACCAACTATCTCG	F	COLEC10	NM_006438	3'UTR									120118684	120118807	NC_000008.10
cg15008587	0.510093	0.567734	0.597661	0.57373	0.588646	0.569139	0.664065	0.607512	0.640781	0.66504	0.62752	0.667596	0.000775391	0.0318618	0.0775853	37	4	122927073	CGAACAAGCAGAAAGCAAGAGAAGATGTGATCAAGTCACATCTGGACCGT	R							TRUE					122927073	122927196	NC_000004.11
cg20450338	0.579402	0.591815	0.589365	0.549172	0.583452	0.617768	0.666229	0.623298	0.702606	0.647136	0.683932	0.653107	0.000408419	0.0253379	0.0775554	37	13	23411771	TGGCAGCAACAGCATCTTTTCTTAAGCAGTACCCATTATGAAAAAATCCG	R				chr13:23412207-23412623	N_Shore	RDMR						23411771	23411894	NC_000013.10
cg20390119	0.636879	0.624372	0.603364	0.622115	0.579296	0.647303	0.699451	0.687617	0.696419	0.656237	0.734054	0.704858	0.000299175	0.022705	0.077551	37	15	37161314	AAGTTAACAGAATGATGGATCTCAAATGCAAACACTGAATCTCTACCACG	R	LOC145845	NR_024264	Body									37161314	37161437	NC_000015.9
cg27518977	0.452722	0.473466	0.453969	0.450871	0.43104	0.45572	0.561787	0.499439	0.549215	0.53935	0.486666	0.546592	0.00072825	0.0310766	0.0775436	37	7	37924598	TTTCCCTGCTTCTATTCTTTTATAGATATGCTCTTGAAAACATATCAACG	R	TXNDC3	NM_016616	Body									37924598	37924721	NC_000007.13
cg04748546	0.869363	0.800972	0.794475	0.784424	0.792331	0.797391	0.873509	0.899189	0.910591	0.85352	0.852994	0.914284	0.00111674	0.0363135	0.0775218	37	19	49696260	TGGTGTCCTTCCCTAGCAATTTCTCATCTGCACATGTGATGATGATGACG	R	TRPM4	NM_017636	Body	chr19:49699698-49700070	N_Shelf							49696260	49696383	NC_000019.9
cg17934894	0.580121	0.56261	0.606426	0.605231	0.601016	0.572328	0.625622	0.707955	0.679622	0.635453	0.645183	0.698558	0.00148029	0.0402686	0.0774433	37	4	27050410	GCTGAATGCATGTGCACACGAAAACGCTAAATGAACAGCCCGCATAATCG	F							TRUE		4:27049517-27050538	Unclassified		27050410	27050533	NC_000004.11
cg02873885	0.133837	0.124316	0.111559	0.116974	0.0792064	0.110515	0.220325	0.20716	0.204189	0.125646	0.187064	0.196303	0.00120157	0.0373338	0.0773796	37	7	55000889	CGGGCTCCCTCGCGCTGACCTAAGTTAATTTTTAATGTACAATTAAAGTA	R				chr7:55000876-55001135	Island			7:54968383-54968629			TRUE	55000889	55001012	NC_000007.13
cg12693959	0.646777	0.679314	0.62621	0.668788	0.66561	0.643215	0.717416	0.702755	0.699785	0.748968	0.79528	0.729427	0.00181149	0.0435769	0.0772865	37	11	114483235	CGGGGGTAACCACTGTTACCCTGTGTCTAATAAGTGTTGCCTCATGGGTA	F								11:113988030-113988824				114483235	114483358	NC_000011.9
cg08866497	0.13939	0.116433	0.189032	0.114087	0.147567	0.143341	0.222873	0.243934	0.209669	0.18585	0.204236	0.246814	0.00039628	0.0250899	0.0772543	37	5	43781155	GAGTGGGGCCCCTGGAGGAGTTAGACATCACCAAAGGCTTTGGGGCTGCG	F							TRUE					43781155	43781278	NC_000005.9
cg10818781	0.737199	0.698777	0.724201	0.763679	0.729425	0.799601	0.814224	0.787858	0.827196	0.805466	0.813741	0.867579	0.00188139	0.0441698	0.077197	37	12	7081178	CTCCTTTCTCTTACCCGTTAGAACTAATTGAATAGGCCCAGAAGAAATCG	R	PHB2;PHB2;EMG1	NM_001144831;NM_007273;NM_006331	TSS1500;TSS1500;Body	chr12:7079500-7080129	S_Shore							7081178	7081301	NC_000012.11
cg03630037	0.751349	0.752624	0.781822	0.756666	0.747784	0.808973	0.861423	0.82787	0.857983	0.811498	0.842586	0.86086	0.000152143	0.0177888	0.077167	37	5	30930561	CGGGTCAAGATGCCCCATATATAGATGGAGATGTAAGTTGAAGATGCAGT	F							TRUE					30930561	30930684	NC_000005.9
cg14605274	0.778755	0.71364	0.731634	0.709889	0.746664	0.762797	0.778723	0.814089	0.826862	0.815386	0.824239	0.846868	0.000370788	0.0244098	0.0771314	37	2	169750924	CGAGTACCACACAGGACAGAGATAGATCAGACCTCAAGAAGCTTGTGGTC	R				chr2:169746719-169747005	S_Shelf							169750924	169751047	NC_000002.11
cg18563133	0.603235	0.623953	0.62478	0.655091	0.659128	0.643784	0.695116	0.692535	0.743579	0.705442	0.738826	0.697194	0.000133152	0.0170595	0.0771199	37	14	104992441	TGTAGAGTTTGCCTCTAGACACTGTGCTGTGAGGAGTAGGCCTCTACACG	F								14:104063462-104063487				104992441	104992564	NC_000014.8
cg06977987	0.628711	0.674541	0.618641	0.643675	0.641458	0.656901	0.701575	0.718713	0.771721	0.695983	0.71294	0.72562	0.000303325	0.0228001	0.0771041	37	11	4902464	CTTCTTCTTCTGTCTCCATTCCACAGGAAAGATTTCCCCAGCAGCAAACG	R	OR51T1	NM_001004759	TSS1500				TRUE					4902464	4902587	NC_000011.9
ch.14.679957F	0.0800421	0.0966151	0.0827864	0.0685897	0.108501	0.0913401	0.161391	0.174912	0.205881	0.110674	0.136872	0.200353	0.00252655	0.0495521	0.0770346	36	14	56143793	CAGTAGCTAAGATGGCAATGATAGGTGACAGTTAACTGCCCCATACCTAT	F	KTN1;KTN1;KTN1;KTN1	NM_001079521;NM_004986;NM_001079522;NM_182926	Body;Body;Body;Body									56143793	56143916	NC_000014.8
cg06776823	0.806808	0.772625	0.775037	0.789187	0.744663	0.797156	0.877726	0.823859	0.827222	0.836361	0.884906	0.897381	0.00101206	0.0351467	0.0769965	37	12	107170751	AGCCCAGTGCTGTTGCACGCACCTGTAGTCTCAGCTACTTGGGAGGGTCG	F	RIC8B	NM_018157	Body	chr12:107167762-107168747	S_Shelf							107170751	107170874	NC_000012.11
cg25937230	0.310434	0.331734	0.303078	0.332592	0.28134	0.270003	0.420523	0.386092	0.369584	0.382304	0.387682	0.344687	0.000359292	0.0241127	0.0769484	37	15	29560915	CGAACCCAGGGAGCATATTGCTGTAAACGCTTCAATGTGTGTAGCTTTAG	R	NDNL2;FAM189A1;NDNL2	NM_138704;NM_015307;NM_138704	1stExon;Body;3'UTR	chr15:29561494-29562143	N_Shore							29560915	29561038	NC_000015.9
cg08573038	0.671018	0.700382	0.67316	0.743177	0.712342	0.675354	0.774128	0.737806	0.809815	0.788897	0.786656	0.739642	0.000916926	0.0337952	0.0769182	37	12	110399302	CGTCGACACTCGCACCATCAGGACAGCAGAAATTGGACTAGTAAAACACT	F	GIT2;GIT2;GIT2;GIT2;GIT2;GIT2	NM_014776;NM_001135214;NM_057170;NM_057169;NM_001135213;NM_139201	Body;Body;Body;Body;Body;Body			CDMR		12:108883525-108883696				110399302	110399425	NC_000012.11
cg16765531	0.130076	0.0976849	0.105129	0.0792496	0.0894496	0.100262	0.205499	0.173097	0.216658	0.134896	0.133161	0.199992	0.00215581	0.0465684	0.0769084	37	7	84330779	CGGGCACTGTGCTGTCTGCTTTATGTTTTTGTTTATGGTAATTACATTTT	R							TRUE					84330779	84330902	NC_000007.13
cg25700851	0.825713	0.773715	0.800451	0.772568	0.817362	0.836563	0.882896	0.922452	0.865333	0.837904	0.865844	0.913183	0.00120731	0.037369	0.0768733	37	X	7164772	TGGCCTAAGACACAGACTGAGAGTGTAACTAATGGATCATTTCCTTCCCG	F	STS	NM_000351	Body									7164772	7164895	NC_000023.10
cg12789884	0.621553	0.607738	0.622586	0.607758	0.674068	0.639808	0.690647	0.69082	0.737411	0.659899	0.712402	0.74342	0.00102888	0.0352993	0.0768481	37	3	175554437	CGTCAAGTAAGTGCATAAAGTCACAGGTTGTCACTTCTTGAGATGGTTAC	F							TRUE					175554437	175554560	NC_000003.11
cg03835296	0.630317	0.592394	0.627369	0.635167	0.626502	0.636511	0.695897	0.699386	0.695877	0.727244	0.700579	0.690191	5.79e-06	0.00645186	0.0768191	37	6	25830922	AGAGGCAACTGACCAAACACTACCCAGTACTCCTCTCTGATTTAAAACCG	R	SLC17A1	NM_005074	5'UTR									25830922	25831045	NC_000006.11
cg00349573	0.702324	0.70427	0.751418	0.757575	0.764812	0.774959	0.799914	0.795268	0.851967	0.860644	0.812396	0.796069	0.00140411	0.0396149	0.0768167	37	1	242611826	GATATGTAATCCTATTTATTATCAATGTCCTTTGTCCATTAATCCTTTCG	R	PLD5	NM_152666	5'UTR				TRUE					242611826	242611949	NC_000001.10
cg04071440	0.663578	0.722083	0.689168	0.761755	0.674946	0.687126	0.768683	0.767568	0.768063	0.78006	0.775579	0.798979	0.00251037	0.0493916	0.0767126	37	6	29648275	CGGCCCTTTGGTCTCTGCTCAGGGCTTCGGGGACCCTTTCCAGCCATTGC	F								6:29756034-29757072	6:29648152-29649066	Unclassified_Cell_type_specific		29648275	29648398	NC_000006.11
cg02463513	0.521845	0.5615	0.540209	0.532794	0.551844	0.593462	0.603129	0.650206	0.604892	0.618265	0.678933	0.606307	0.000943642	0.0341642	0.07668	37	3	145883489	AACAGTCTCCTTTGCTGATTTCTTTTTTCCTCTTTCCTCAAAAGGGTCCG	F							TRUE					145883489	145883612	NC_000003.11
cg22135490	0.661012	0.637432	0.658423	0.650511	0.626043	0.624339	0.711556	0.675124	0.74811	0.704871	0.749412	0.728357	0.00045078	0.0262865	0.0766116	37	12	126926510	GGAACCCTGGATCATTCTATGAAATTTTCCAAAAAGCTAGTCAGAGGCCG	R	LOC100128554	NR_015398	TSS1500									126926510	126926633	NC_000012.11
cg01384319	0.327358	0.312199	0.302312	0.342422	0.386578	0.376734	0.404746	0.410564	0.423816	0.426284	0.414101	0.427656	0.00212611	0.0462519	0.076594	37	2	134766697	CGAGTAAGTGGTCAAGACTTATCTGTAAGGATGTTTCTTGTGGTATTATT	F				chr2:134767365-134767691	N_Shore							134766697	134766820	NC_000002.11
cg04733856	0.505603	0.454364	0.452712	0.496343	0.495664	0.498653	0.600271	0.595296	0.504706	0.56355	0.53449	0.564215	0.0021513	0.0465248	0.0765314	37	3	24961439	CGTGGGTTTTAACATGTTCATTTTGTAATAACCTCGCTGGACACTGCTTA	F							TRUE					24961439	24961562	NC_000003.11
cg06312221	0.505887	0.536563	0.493442	0.485562	0.532248	0.545908	0.562386	0.588606	0.611233	0.585508	0.613003	0.597733	0.000179567	0.0188486	0.0764764	37	13	55373388	CGTCTGAACATCAGAAGGAACAAACTCCAGACACGCTGCTTTTAAGAACG	R								13:54271389-54271573				55373388	55373511	NC_000013.10
cg17651760	0.841691	0.790111	0.801546	0.774572	0.808867	0.8702	0.87503	0.887706	0.899545	0.893722	0.891568	0.89813	0.00256484	0.0498114	0.0764523	37	12	9389499	TTAGTGCTTTCTCTCAATCCATTGCCTGTTGTCAGAAACTTCATTAATCG	R				chr12:9392459-9392686	N_Shelf							9389499	9389622	NC_000012.11
cg09172850	0.741084	0.707277	0.750953	0.757291	0.78091	0.743359	0.807485	0.828768	0.826431	0.794429	0.821933	0.860184	0.000201891	0.0196815	0.0763929	37	1	191933198	CGGCCAGACTCCTTGGGTTTGTGTCATGGCTCAGCCACTTAGCAGCTGTG	F							TRUE					191933198	191933321	NC_000001.10
cg11555315	0.581709	0.583861	0.595112	0.616825	0.574578	0.61498	0.652995	0.664567	0.682989	0.626529	0.721785	0.676519	0.000968546	0.034505	0.0763863	37	X	53115787	CGAGGTGGGGGAGTGGCAAAACACAGTGCATTTCAGCACAGTCTGTACCC	F	TSPYL2	NM_022117	Body	chrX:53117470-53118033	N_Shore							53115787	53115910	NC_000023.10
cg07745899	0.76239	0.727981	0.714691	0.768264	0.808252	0.783091	0.86529	0.834606	0.843002	0.8075	0.829999	0.842267	0.00161744	0.0416456	0.0763328	37	X	100303724	GCCTCAGCATCCCAAAGTGTTGGCATTACAGGCATGAGCCACCACATTCG	R	TRMT2B;TRMT2B;TRMT2B;TRMT2B	NM_001167972;NM_001167971;NM_001167970;NM_024917	5'UTR;5'UTR;5'UTR;5'UTR	chrX:100306614-100306992	N_Shelf							100303724	100303847	NC_000023.10
cg23050705	0.129861	0.0686633	0.107507	0.106855	0.0810112	0.0907481	0.220762	0.16431	0.199808	0.124189	0.143419	0.189865	0.00214673	0.0464654	0.0762846	37	1	231694386	CGTTTTGCTGTTTGCTTTTGTGTGCATGAAGTATCTTTAGAAGGAAATGA	F	TSNAX-DISC1;TSNAX-DISC1;TSNAX-DISC1;TSNAX;TSNAX-DISC1;TSNAX-DISC1;TSNAX-DISC1;TSNAX-DISC1;TSNAX-DISC1	NR_028398;NR_028394;NR_028397;NM_005999;NR_028395;NR_028399;NR_028393;NR_028400;NR_028396	Body;Body;Body;Body;Body;Body;Body;Body;Body				TRUE					231694386	231694509	NC_000001.10
cg10198294	0.635222	0.616761	0.641619	0.585052	0.61917	0.630472	0.742991	0.685104	0.694932	0.673272	0.679287	0.710086	0.000239544	0.0208453	0.0762295	37	10	28616726	GCCTGGCTGCTCAGCACACTAGCAGCTATTGTGCCCTGACATTATATTCG	R							TRUE					28616726	28616849	NC_000010.10
cg23948876	0.121596	0.120239	0.130736	0.117972	0.0960037	0.103907	0.170765	0.172775	0.218483	0.169085	0.177732	0.238916	0.000784699	0.0320167	0.0762171	37	14	19562827	CGTTCCCAAGGTCACACACCTAGCAAGTAAGAAAGTTAGGAATTAAACCC	R	POTEG;POTEG	NM_001005356;NR_027480	Body;Body									19562827	19562950	NC_000014.8
cg05990812	0.653835	0.638332	0.611738	0.611116	0.610659	0.63513	0.725901	0.707336	0.690627	0.674557	0.712952	0.706541	2.66e-05	0.0103984	0.0761842	37	15	25419769	CGAACAATTTGTGCAGTGAACGCAATCATCACAGGGTCCTGAGGCGAAAT	F	SNORD115-3	NR_003295	TSS1500									25419769	25419892	NC_000015.9
cg20690782	0.428666	0.436706	0.50153	0.467846	0.435749	0.471107	0.512068	0.497182	0.527767	0.523416	0.572411	0.565764	0.00107937	0.035853	0.0761672	37	1	26937762	CGTTTGCAGAGTAGAACAGGTTGATAGAATTGTAGCTGATTAAAAACAGT	R							TRUE		1:26937727-26937803	Unclassified_Cell_type_specific		26937762	26937885	NC_000001.10
cg22457769	0.344889	0.30694	0.372273	0.357742	0.324227	0.347617	0.405591	0.393404	0.434205	0.400686	0.403532	0.473172	0.00077086	0.0317913	0.0761504	37	8	144822917	CTGGGGCGGGGTGGTGGGGTACACAGGCGATCAGGCGATGGGCGGTGCCG	F				chr8:144822011-144822805	S_Shore		TRUE	8:144894000-144894927	8:144822374-144823649	Unclassified		144822917	144823040	NC_000008.10
cg13897222	0.67031	0.674087	0.693596	0.650471	0.696423	0.657973	0.779436	0.741497	0.774285	0.721189	0.727938	0.755369	0.000139369	0.0172855	0.0761421	37	1	221449786	CGCCAACTTTGAAAAGGGCAGGGCTGTATACAGAGGTCTGCCTCCAGCCA	R							TRUE					221449786	221449909	NC_000001.10
cg05295584	0.510346	0.534196	0.560389	0.539983	0.553836	0.545069	0.585238	0.567791	0.630644	0.620491	0.640668	0.655525	0.00140963	0.0396962	0.0760895	37	1	109399734	TAGAATCCAAATTGATTTTCTGAAGTCAGGTGACTACATTTGGGGCCACG	R	AKNAD1	NM_152763	TSS200									109399734	109399857	NC_000001.10
cg15860193	0.674938	0.670953	0.678761	0.599609	0.660676	0.631217	0.695153	0.747567	0.745242	0.717321	0.762871	0.704242	0.00117001	0.0369138	0.0760403	37	3	42975748	CGGTAGATCTTTATTGTGAAGGCTTGAGTTGATCTAATCAGGAGTTAAAC	F				chr3:42977830-42978090	N_Shelf							42975748	42975871	NC_000003.11
cg22720482	0.648233	0.648618	0.61588	0.60762	0.661662	0.695093	0.740706	0.719542	0.672354	0.730753	0.712279	0.757498	0.00154616	0.0409319	0.0760042	37	8	62066624	CGGCAAAAGGAAACCCAAGGCAGCAATTACAAGAGGCTCAGCACTGTTCC	F							TRUE					62066624	62066747	NC_000008.10
cg09831620	0.677424	0.639342	0.654893	0.642999	0.612358	0.648368	0.722029	0.714595	0.722745	0.684142	0.754077	0.733567	0.000147173	0.0176406	0.0759616	37	3	98001736	AACAAACTCTGTCAGCAATGTTGTATTATCCTGTTCCATGTCCTCATTCG	F	OR5H2	NM_001005482	1stExon									98001736	98001859	NC_000003.11
ch.10.6667087F	0.145769	0.103488	0.16111	0.0747546	0.101949	0.119614	0.187669	0.184599	0.258234	0.172351	0.164571	0.194965	0.00234673	0.048162	0.0759509	36	10	6627081	CAGTCAAAGAATTGTGTATGTTTATGAAAGTTCTGATTAATAAGATATTC	F												6627081	6627204	NC_000010.10
cg23075139	0.380594	0.344498	0.356156	0.33099	0.357062	0.355824	0.390549	0.450164	0.432136	0.436468	0.477803	0.393575	0.00143229	0.0399017	0.0759284	37	3	115524031	GACATATAGCCCTTAAAACCTTTCCCTCTATTTCCCTTGCTTTGGGGTCG	R	LSAMP	NM_002338	3'UTR				TRUE					115524031	115524154	NC_000003.11
cg17371294	0.612295	0.624442	0.612513	0.622059	0.613048	0.619478	0.728429	0.657592	0.689977	0.719242	0.676886	0.687161	0.000715104	0.0308837	0.0759088	37	5	178012716	TGGGGAGCAACCAACAGGGTCAGCCAGGGCTGTGGAGTGTTACCCCAGCG	F	COL23A1	NM_173465	Body	chr5:178016558-178017670	N_Shelf				5:178012521-178012876	NonGene_Associated_Cell_type_specific		178012716	178012839	NC_000005.9
cg12222244	0.777799	0.721435	0.761396	0.723795	0.770724	0.789527	0.810797	0.823318	0.859772	0.814427	0.816364	0.875054	0.000826084	0.0326103	0.075843	37	3	181633701	CGCTGTAGAAATGAGACTGCCTCATAGAGTTGTTTTAAAGGGACCAAAGC	F							TRUE					181633701	181633824	NC_000003.11
cg05172197	0.195053	0.215092	0.169507	0.196318	0.183863	0.157944	0.281627	0.238685	0.245207	0.272503	0.260906	0.273776	4.57e-05	0.0120452	0.075821	37	14	38727014	AAGAACATTCCTTAGTCCTTCCTTCAGATGTCTGAGAATCACCTTAAACG	R	CLEC14A	NM_175060	TSS1500	chr14:38724254-38725537	S_Shore							38727014	38727137	NC_000014.8
cg10445599	0.574196	0.569411	0.557785	0.64358	0.585593	0.587519	0.66831	0.641736	0.642081	0.639513	0.65459	0.726691	0.00210148	0.0460294	0.0758063	37	12	12558857	CGTGTTTTGGGCTACCTAGCCAAGTAAAATGGCCAAGATCATGCCACAGA	F	LOH12CR1	NM_058169	Body				TRUE					12558857	12558980	NC_000012.11
cg26440467	0.23083	0.286544	0.29156	0.296696	0.307688	0.289134	0.355457	0.370852	0.383331	0.327086	0.370092	0.350428	0.000333283	0.0235566	0.0757992	37	8	145654605	CTGCAGCTGTGCAGCAGACGCCTCTGCGCTGAGGACAGGGACGCCCTGCG	F	VPS28;NFKBIL2;VPS28	NM_183057;NM_013432;NM_016208	TSS1500;Body;TSS1500	chr8:145654517-145654810	Island			8:145625326-145625589	8:145654464-145655047	Unclassified	TRUE	145654605	145654728	NC_000008.10
cg11331769	0.524764	0.542119	0.50951	0.473237	0.511928	0.499103	0.551937	0.587074	0.598213	0.569181	0.578593	0.630179	0.000416257	0.0255386	0.0757527	37	X	153639287	CGGGTCATGAATATGTTTCAGAACTAGAGGTAGTAGCTGACATTGTGACT	F	TAZ;TAZ;DNASE1L1;DNASE1L1;TAZ;DNASE1L1;TAZ;TAZ	NM_181311;NM_181312;NM_001009934;NM_001009932;NR_024048;NM_001009933;NM_181313;NM_000116	TSS1500;TSS1500;5'UTR;5'UTR;TSS1500;5'UTR;TSS1500;TSS1500	chrX:153639734-153640675	N_Shore							153639287	153639410	NC_000023.10
cg26269080	0.73186	0.707467	0.757183	0.736939	0.716801	0.768916	0.789284	0.800261	0.790463	0.823447	0.843027	0.827066	0.000182609	0.0189272	0.0757301	37	6	113779374	CGCTTTTAAAATGGAGATAAAGAAGGGTAATTCAGAGTGTTGGAATACTG	R							TRUE					113779374	113779497	NC_000006.11
cg20806345	0.160044	0.135323	0.210126	0.211154	0.221086	0.20779	0.310949	0.244635	0.280471	0.258275	0.251167	0.253852	0.00184952	0.043916	0.0756377	37	2	182543706	TTTAACTTTTTCTCAGAGGCATTCATTTTGTAATGGGCAGGTACTTTTCG	F	NEUROD1	NM_002500	5'UTR				TRUE					182543706	182543829	NC_000002.11
cg01664014	0.121846	0.0835033	0.103099	0.0793933	0.0886725	0.0798408	0.177788	0.122208	0.217802	0.142501	0.153662	0.195838	0.0020722	0.0458104	0.0755743	37	4	152887836	TACTTTCAAAGACCATAGGTCTGAAATCATCAAAACTCTACTTTCAAACG	R							TRUE					152887836	152887959	NC_000004.11
cg00095276	0.751584	0.753952	0.72259	0.716852	0.684825	0.688435	0.825332	0.776641	0.776092	0.842125	0.790522	0.760967	0.00166217	0.0421469	0.0755734	37	5	1068111	CGGGGAGCAAGAACACCAGGGCCTTAGGACCCCTTTTATGCCAATCAGTG	F	SLC12A7	NM_006598	Body	chr5:1068746-1069000	N_Shore			5:1120430-1121187	5:1068111-1068251	Unclassified_Cell_type_specific		1068111	1068234	NC_000005.9
cg19967023	0.784021	0.741217	0.778606	0.797854	0.723024	0.777486	0.824109	0.841842	0.860167	0.816995	0.840358	0.872002	0.000514251	0.0274363	0.0755439	37	14	65066622	CGGGTTGGAAGAGCCTTTGGGAAAGCGAATCGATACCCTGATTGCAGTCC	F				chr14:65068368-65068668	N_Shore			14:64136267-64136376				65066622	65066745	NC_000014.8
cg12232738	0.744801	0.680913	0.724254	0.680531	0.7178	0.698697	0.796804	0.786626	0.787408	0.75124	0.752536	0.825498	0.000681716	0.0302527	0.0755192	37	X	47064038	GGCTCCTTGGCTGGTGTCTGGGAACTTGGAATTCAGGAAGGTTCCCACCG	F	UBA1;UBA1;INE1	NM_003334;NM_153280;NR_024616	Body;Body;TSS1500									47064038	47064161	NC_000023.10
cg18123072	0.760168	0.787369	0.737319	0.748856	0.743579	0.765341	0.815275	0.841087	0.872162	0.835328	0.817643	0.813865	9.42e-05	0.01527	0.0754548	37	5	122878689	CACAGGAGACAGACTCCAAGATGACCCTGATGTTTGAATTAGAAGATACG	F	CSNK1G3;CSNK1G3;CSNK1G3;CSNK1G3	NM_001044722;NM_004384;NM_001031812;NM_001044723	5'UTR;5'UTR;5'UTR;5'UTR				TRUE					122878689	122878812	NC_000005.9
cg04291891	0.621335	0.631406	0.661803	0.679078	0.681099	0.615545	0.72584	0.685715	0.707013	0.745256	0.736231	0.742804	0.000682906	0.0302751	0.0754324	37	11	15279827	CGAAAGAGAGGCAGGGCTTTAGGTTGATTACAGCTTTAGAACCAACAACC	R							TRUE					15279827	15279950	NC_000011.9
cg04910587	0.721483	0.708051	0.733067	0.698855	0.753681	0.761887	0.786807	0.797265	0.834388	0.771747	0.850702	0.78856	0.000987287	0.034783	0.0754075	37	1	205721920	GCCAACAGTAAGTTTTTTACAATAGCCATCCTAATGAGTGTCCATATACG	R				chr1:205718238-205719345	S_Shelf							205721920	205722043	NC_000001.10
cg26834993	0.541103	0.5219	0.538339	0.559618	0.581125	0.56403	0.598617	0.61069	0.623476	0.603481	0.683411	0.638828	0.000961867	0.0344138	0.075398	37	1	119739207	CGTGCTGCCCAGACTTTTGGATGAAGGGTAAAACAAATAAAGCTGCCGCC	F							TRUE					119739207	119739330	NC_000001.10
cg22146571	0.68572	0.695898	0.734785	0.693909	0.696742	0.703953	0.719995	0.803345	0.793575	0.773779	0.792691	0.779647	0.000697699	0.0305617	0.0753374	37	15	35563860	CGTGGGTCAGCTTTGCCCTGCATAGTGCCTGACAATATTGATTGAAGAAG	R							TRUE					35563860	35563983	NC_000015.9
cg04270013	0.714754	0.714672	0.721267	0.72199	0.721786	0.741726	0.770609	0.811555	0.776909	0.798781	0.811263	0.818837	5.64e-05	0.0128298	0.0752934	37	16	66172061	CGCACAAATGATAAATTGTCAAAACAGAAGTGTGATTATCCCCTTTGGGG	R							TRUE					66172061	66172184	NC_000016.9
cg05691158	0.767657	0.728382	0.754971	0.73027	0.745839	0.776572	0.819473	0.807179	0.804294	0.821057	0.833597	0.869801	0.000162609	0.0181933	0.0752851	37	12	77668964	GTGTGCACAGTCACATTTCCTAGGAGAGTCTAAGCAAAATACAGCCTTCG	R							TRUE					77668964	77669087	NC_000012.11
cg11192169	0.455187	0.434905	0.421876	0.447513	0.437335	0.443011	0.509942	0.526254	0.488789	0.524244	0.494612	0.547611	9.8e-05	0.0154744	0.0752706	37	8	96393868	CTGGTGCAAGGCCTCTCTGTTATTCCTGGCAGGCACACTGAGACACATCG	R							TRUE					96393868	96393991	NC_000008.10
ch.6.1433484F	0.114933	0.0612244	0.0975811	0.064718	0.0643915	0.111763	0.175008	0.131677	0.1924	0.123102	0.152447	0.19123	0.000889363	0.0334485	0.0752085	36	6	67606015	CAGGACCACTTCAAAATGTGGCAAAGAAACATATTTTGGAGTAAAATATC	F												67606015	67606138	NC_000006.11
ch.20.221631R	0.085044	0.0543228	0.0940915	0.0582158	0.0480428	0.089857	0.165019	0.156514	0.175286	0.091946	0.142062	0.149928	0.000603573	0.0289621	0.0751969	36	20	10026325	CAGCAGTCTGCAAAACCACCCATGGCAGCATAATGAAGTGGTGTGTTCCC	F	ANKRD5;ANKRD5	NM_198798;NM_022096	Body;Body									10026325	10026448	NC_000020.10
ch.2.3935127R	0.103622	0.0641437	0.0833489	0.0536808	0.063265	0.0759503	0.148384	0.165218	0.178557	0.0934129	0.128421	0.181097	0.00151108	0.040581	0.0751797	36	2	198262745	CAGTCAACACATTTGGTTATATTGCAAAGGCCATTGGGTGAGTGTTATTT	F	SF3B1	NM_012433	Body									198262745	198262868	NC_000002.11
cg02396891	0.68582	0.649748	0.657414	0.649682	0.621613	0.711142	0.753149	0.72395	0.722869	0.750022	0.742112	0.734389	0.00117323	0.0369595	0.0751786	37	7	93222734	ACCTTTCTATCTTGCCTCTGAACATTCTTGTTCTTTGTTTCTCTCTTACG	R							TRUE					93222734	93222857	NC_000007.13
cg13583088	0.436049	0.39506	0.451371	0.444132	0.424994	0.442778	0.510346	0.527388	0.484334	0.532161	0.518428	0.472774	0.000177406	0.0188013	0.0751744	37	14	94360154	GCCGCAGGGAAGGAGCCCTTCACTGTGGCTCAGACACTTTCCAGCTGACG	R							TRUE		14:94359292-94360549	Unclassified		94360154	94360277	NC_000014.8
cg12736037	0.584465	0.627638	0.611338	0.636586	0.64241	0.629002	0.671707	0.680233	0.691292	0.713581	0.682048	0.743295	0.000367238	0.0242964	0.0751195	37	6	164294790	CGCTATCCACAAATGTGACCATTTCATGTTGTGGTGTGAAGGCTTGCAGC	F							TRUE					164294790	164294913	NC_000006.11
cg09161330	0.751022	0.697917	0.697155	0.715922	0.719047	0.714674	0.765928	0.787026	0.815784	0.751079	0.803817	0.822792	0.000492495	0.0271379	0.0751148	37	1	193040395	TTACAACATCTGATATACAGCAAGGGCCCTCAACTCCCAGGCTATACACG	F	TROVE2;TROVE2;TROVE2	NM_004600;NM_001042369;NM_001042370	Body;Body;5'UTR									193040395	193040518	NC_000001.10
cg15639718	0.71286	0.66687	0.685644	0.687345	0.667793	0.681179	0.751239	0.795869	0.733112	0.781964	0.761505	0.728531	0.000317724	0.0231476	0.0750879	37	1	8361284	CGCCCAGCTACAGGATATCGATTAATCCCACCCAGCTACAGGATATTGAT	R							TRUE					8361284	8361407	NC_000001.10
cg17978764	0.774727	0.763706	0.717182	0.746465	0.743465	0.739764	0.848067	0.847092	0.82879	0.825005	0.792592	0.794152	0.000197946	0.0195203	0.075065	37	6	45905407	ACCTAGCACAGTACCTGGCACATAAGCAGTGCCCTTTAAATATTAGCTCG	R	CLIC5;CLIC5	NM_001114086;NM_016929	Body;Body									45905407	45905530	NC_000006.11
cg18677148	0.237293	0.241019	0.26266	0.205103	0.263009	0.225666	0.29628	0.325914	0.365376	0.307117	0.301909	0.288149	0.000528292	0.0277227	0.074999	37	17	57712280	TTCCAGGAAGGGCTCAATGAAGTGACTGCTGTCAGCATCTTTTTTCACCG	R	CLTC	NM_004859	Body				TRUE		17:57712166-57712331	Promoter_Associated_Cell_type_specific		57712280	57712403	NC_000017.10
cg04481865	0.108242	0.0809246	0.11762	0.0797436	0.0786913	0.109544	0.151926	0.149059	0.212029	0.150214	0.158342	0.20309	0.000546941	0.0279854	0.0749823	37	X	139584049	CGGCTGGAAATGTGGAATTCGGACCAATTTACGGGAGACTCTGTCGCCTA	F				chrX:139585867-139588578	N_Shore	DMR		X:139411493-139411775	X:139584047-139584164	Unclassified_Cell_type_specific		139584049	139584172	NC_000023.10
cg01923075	0.633736	0.653259	0.70483	0.712837	0.709572	0.652989	0.729135	0.759674	0.788214	0.779331	0.717249	0.743157	0.00239053	0.0485218	0.0749226	37	7	105223735	TCGGCCTTGCTGCTCATTGGTTGCGGTGATGGAGACTGGGGCCGGCTGCG	R				chr7:105223524-105223850	Island			7:105010761-105011086				105223735	105223858	NC_000007.13
cg20528338	0.101675	0.0924778	0.0991748	0.0915918	0.07201	0.100762	0.157332	0.142419	0.19909	0.122978	0.17185	0.213124	0.0021411	0.046397	0.07485	37	18	21976748	CGAATCTGCAAATTATTTCCCAGATGCTGAGTAAAGAGGTGAGGAGGTTC	F	OSBPL1A	NM_080597	5'UTR	chr18:21977275-21978110	N_Shore				18:21976649-21978228	NonGene_Associated		21976748	21976871	NC_000018.9
cg02021919	0.794993	0.754518	0.775343	0.770549	0.791611	0.820479	0.863367	0.871881	0.83406	0.879668	0.880803	0.826559	0.000234869	0.0206869	0.0748074	37	5	86707074	CGGTGTTTAAGCCAGCAATGCCAAGATCTGTTGTGGTAAGTTACAGTGGT	R	CCNH	NM_001239	Body	chr5:86708296-86708878	N_Shore							86707074	86707197	NC_000005.9
cg13665890	0.0896904	0.0650051	0.0718263	0.0548047	0.0536034	0.0701023	0.149525	0.12638	0.168307	0.0907278	0.134405	0.184132	0.00161737	0.0416456	0.0747408	37	4	128654094	CGTCCTGCTGCTATATGCAGGCCAGTCATACATGATGAAGATTTATCCCG	F	SLC25A31	NM_031291	Body	chr4:128651419-128651977	S_Shelf						TRUE	128654094	128654217	NC_000004.11
cg23176759	0.219302	0.212132	0.191974	0.208364	0.164005	0.150139	0.27474	0.249386	0.223234	0.280119	0.277337	0.289285	0.000662896	0.0299262	0.0746972	37	6	66360569	TGGACTGCTGTGAATGTTGTTTCCCCAGAAGAAAACATCCTCCCGAAACG	F	EYS;EYS	NM_001142800;NM_001142801	5'UTR;5'UTR				TRUE					66360569	66360692	NC_000006.11
cg15045554	0.116339	0.0854454	0.109359	0.0762592	0.0794159	0.0769612	0.155487	0.17271	0.197189	0.102502	0.177783	0.186071	0.00159669	0.041434	0.0746603	37	6	56733060	CGTGGTTCTGATAGTTCAGCATCTCAGGTCACTGTTCTGGGCCTTATTTC	F	DST	NM_001144769	Body				TRUE					56733060	56733183	NC_000006.11
cg22864519	0.803084	0.796919	0.776577	0.740812	0.750348	0.760367	0.844754	0.886036	0.874908	0.789056	0.856203	0.8249	0.00223627	0.0473005	0.074625	37	8	82360736	CGTGGTGCTATCAGCATCAGGTGATCTCTGGCCAGGGCCTCCGTGCACGT	R	PMP2	NM_002677	TSS1500									82360736	82360859	NC_000008.10
cg00693994	0.669993	0.634513	0.686505	0.654921	0.645941	0.650805	0.756831	0.717085	0.733641	0.715668	0.71068	0.756457	6.73e-05	0.0136446	0.0746138	37	4	156586710	TTATACAAGCCTGCAACACGTGACAACTGCGGATCAGGCATCTGAACCCG	R	GUCY1A3;GUCY1A3;GUCY1A3;GUCY1A3;GUCY1A3;GUCY1A3	NM_001130686;NM_000856;NM_001130682;NM_001130683;NM_001130687;NM_001130685	TSS1500;TSS1500;TSS1500;TSS1500;TSS1500;TSS1500	chr4:156588297-156589292	N_Shore							156586710	156586833	NC_000004.11
cg07921765	0.321184	0.322991	0.358182	0.334862	0.280822	0.307048	0.352401	0.400943	0.449654	0.388732	0.410707	0.370294	0.0018673	0.0440474	0.0746069	37	1	228888087	CGTAGTTCTCACCAAACTCCAAGTAGAGAAAATTATGTCCTGAGATCCTT	F				chr1:228890742-228890951	N_Shelf							228888087	228888210	NC_000001.10
cg15545269	0.657198	0.630964	0.656404	0.644323	0.633308	0.656291	0.717747	0.708452	0.734687	0.715182	0.721508	0.728522	5.22e-07	0.00334001	0.0746014	37	3	2942503	CGGGTAAGCAAGTTAATGGTAATTGTGCCTTAGTCTTGACTATAACGTTT	F	CNTN4;CNTN4	NM_175613;NM_175607	Body;Body				TRUE					2942503	2942626	NC_000003.11
cg05376119	0.684913	0.711511	0.719886	0.717939	0.733482	0.712842	0.755329	0.796931	0.843736	0.776534	0.804726	0.750837	0.00200744	0.0452957	0.0745867	37	6	18314298	CGGCAGGAAAAGCTCCCTGGGAAGGATGCACAGGCTTGACTAATTAAAGG	R							TRUE					18314298	18314421	NC_000006.11
cg06367354	0.60426	0.58872	0.628457	0.601208	0.640207	0.667572	0.699801	0.693278	0.658464	0.694393	0.733065	0.698879	0.000769017	0.0317505	0.0745761	37	3	8363442	AACAAGGGCATAAATAATACCAAAATAGCACAAAACCCTCATATTATTCG	F												8363442	8363565	NC_000003.11
cg23422763	0.175374	0.21392	0.250623	0.181086	0.211189	0.213559	0.2935	0.246088	0.326967	0.239564	0.278334	0.308579	0.00220069	0.0469735	0.0745465	37	10	60859034	CGAATCTTTTGCATTCTGCAGTGGTGTGTGCTTTTTGAATCATTTCCAAA	R							TRUE					60859034	60859157	NC_000010.10
cg27046201	0.632283	0.609864	0.588964	0.618225	0.619264	0.649931	0.713079	0.662297	0.711431	0.706197	0.712038	0.66054	0.00028187	0.0222094	0.0745085	37	13	94197318	CGGGTTCAACTTAAGTCAACATGTTTGGAATGTTAGATACACTGATGTGC	F	GPC6	NM_005708	Body									94197318	94197441	NC_000013.10
cg12699321	0.633202	0.625873	0.614986	0.584913	0.586373	0.625486	0.642345	0.695185	0.710857	0.672389	0.656433	0.740499	0.00249046	0.0492751	0.0744791	37	3	117158482	CGCTCACAGCAGTGGATTGAAGGTGGTGTACAGGTACTATAGCACCCACT	R							TRUE					117158482	117158605	NC_000003.11
cg17425351	0.729836	0.710814	0.744307	0.716208	0.688154	0.73096	0.772071	0.752093	0.833797	0.762788	0.818563	0.827551	0.00238425	0.0484623	0.0744308	37	11	110843045	CGAAGTGAAAATTGAATTGGGAAAAGTGCCATGGCTCACAGAGGATGGAT	R							TRUE					110843045	110843168	NC_000011.9
cg08678314	0.558978	0.554399	0.568077	0.564934	0.573386	0.607663	0.591548	0.67796	0.627216	0.653597	0.660326	0.663303	0.000990502	0.0348298	0.0744186	37	3	153679297	CGTTGGGCACAGTTTCATCACTTGGCAATCACTGATATCTTTACAGTGTG	R							TRUE					153679297	153679420	NC_000003.11
cg10585293	0.74478	0.704495	0.776614	0.738723	0.75061	0.753233	0.835371	0.841761	0.779936	0.771871	0.848487	0.836993	0.00171814	0.0426753	0.0743272	37	12	106884704	GTGCAGGTCATTTAACATCATCAAGACACTGTCTCCTGATAACTTTCACG	F	POLR3B;POLR3B	NM_001160708;NM_018082	Body;Body				TRUE					106884704	106884827	NC_000012.11
cg05302802	0.253537	0.321306	0.268979	0.284873	0.282293	0.241332	0.324835	0.391069	0.320093	0.345894	0.370229	0.346089	0.000876684	0.0333092	0.0743148	37	3	135615534	GGTATTTGGTTCCACTAGGATCACAACAGCATGGCAGTTCTGATGCATCG	F							TRUE					135615534	135615657	NC_000003.11
cg05353590	0.706949	0.701117	0.716436	0.67162	0.684951	0.715021	0.757095	0.801632	0.790832	0.774864	0.753701	0.76364	4.08e-05	0.0118726	0.0742783	37	14	45360220	CGGACAAGATGTAAGGAAGAACTTGAAAGAGCTTTGAGGAGACTGTTAGT	R				chr14:45356672-45356893	S_Shelf							45360220	45360343	NC_000014.8
ch.2.79376880R	0.0968228	0.0722585	0.0887463	0.0570786	0.0655509	0.0589031	0.137562	0.161062	0.172778	0.100307	0.149765	0.163275	0.000297797	0.0226714	0.0742315	36	2	79523372	CAGCTGGATATAAATGATGATTCCTTATCTGCTGTGGGAAATGTTCTTTA	F												79523372	79523495	NC_000002.11
cg17961535	0.116798	0.0597611	0.108135	0.0592723	0.0621799	0.0797918	0.132366	0.153967	0.20552	0.110612	0.143252	0.185479	0.00223193	0.047276	0.0742097	37	5	172761367	TCATAGTCTGAGACTTTGCTTATACACTTCAGTCAGTTTCGCCATTATCG	F							TRUE				TRUE	172761367	172761490	NC_000005.9
cg09177461	0.691507	0.65503	0.661906	0.703468	0.705875	0.669347	0.747365	0.746478	0.7159	0.740387	0.803644	0.778533	0.000985044	0.0347571	0.0741958	37	6	32280185	GAAGCACATTGTATTTCTCCTCCCCATTCTGAGTCAGTGTGCCTGAGACG	R	C6orf10	NM_006781	Body									32280185	32280308	NC_000006.11
cg07360830	0.644296	0.611653	0.613328	0.658263	0.634687	0.624085	0.68415	0.680071	0.682941	0.693533	0.772137	0.718622	0.00229498	0.0477895	0.0741904	37	1	228867909	CGTAAGTGAAAGGAAAACATGTTTTGAACTTGACGGTTCTGCAAAAAAGA	R				chr1:228870810-228872297	N_Shelf							228867909	228868032	NC_000001.10
cg24866764	0.498674	0.519142	0.543237	0.507035	0.493805	0.527301	0.594477	0.562655	0.578745	0.573847	0.596924	0.627653	0.000127277	0.0168933	0.0741847	37	1	220000086	CGATGGCAATATTCTAGAAGCATTCTGCTCTCTGCAGATGCACTACTTTG	R							TRUE					220000086	220000209	NC_000001.10
cg09563851	0.642798	0.636539	0.693656	0.705243	0.685043	0.695782	0.746703	0.787099	0.727755	0.750023	0.741938	0.750276	0.000668181	0.0300084	0.074122	37	17	38939796	CCTGTGCCCTACCTTTGTCATTTCTTATAGTTTTGTGCTTGGTATTTACG	R	KRT27	NM_181537	TSS1500	chr17:38935799-38936093	S_Shelf							38939796	38939919	NC_000017.10
cg13800769	0.350848	0.344552	0.366897	0.339461	0.365901	0.370619	0.405109	0.391434	0.425477	0.436829	0.432128	0.491948	0.0022704	0.0475727	0.074108	37	12	4916913	CGCCCTGTGGGCTTTTTTGATCCCCCAGGATAGAAATCAAAAGAGATCAC	R	KCNA6	NM_002235	TSS1500	chr12:4918273-4919657	N_Shore				12:4916780-4917092	Unclassified_Cell_type_specific		4916913	4917036	NC_000012.11
cg02235529	0.574215	0.623974	0.642221	0.597576	0.593785	0.620556	0.692005	0.660673	0.710108	0.678284	0.641878	0.713836	0.000711679	0.0308205	0.0740763	37	11	56311179	TTAAAGGCCACTTCTTTGTGAAGCATTTCTCATCCATTTCTCCTAATACG	R	OR8U8;OR5M11	NM_001013356;NM_001005245	Body;TSS1500									56311179	56311302	NC_000011.9
cg02135304	0.121716	0.0741061	0.107528	0.0543477	0.0519651	0.101193	0.168747	0.168724	0.182901	0.112751	0.124959	0.196933	0.00220522	0.04701	0.0740267	37	5	88081844	TGTCTAAAAATAGAAAACTGCTTAACTAAAAATAGCCTGGCTCTCAGTCG	F	MEF2C;MEF2C	NM_001131005;NM_002397	Body;Body				TRUE					88081844	88081967	NC_000005.9
cg02114909	0.141597	0.0930455	0.134946	0.11288	0.0877354	0.111898	0.19197	0.21514	0.197117	0.14531	0.172463	0.203993	0.000295352	0.0225997	0.0739816	37	17	1294652	CGTTGTCCAGCTTTTTATCACAGAGATAGCTTAGATCTACGTCTCTAGGA	R	YWHAE;YWHAE	NM_006761;NR_024058	Body;Body				TRUE					1294652	1294775	NC_000017.10
cg26676094	0.185436	0.117941	0.126362	0.141282	0.127615	0.136168	0.230219	0.179383	0.257486	0.193505	0.201522	0.215886	0.000668613	0.0300084	0.0738661	37	5	155811255	CGAAGTAGGAAGACAGAACCACATACTCAAAGATTTGGAAGTAAGAAAGA	R	SGCD;SGCD;SGCD	NM_001128209;NM_172244;NM_000337	Body;Body;Body				TRUE					155811255	155811378	NC_000005.9
cg12032648	0.48686	0.506477	0.489004	0.443852	0.463199	0.450649	0.554112	0.551969	0.584202	0.522673	0.491373	0.578517	0.00224655	0.047385	0.0738008	37	2	166676897	CGCAGAAGAGCTGATGTTAAGAGCAACAGGCTGTCCGGTGTTTTGACCTT	R							TRUE					166676897	166677020	NC_000002.11
cg12032049	0.686835	0.679572	0.697176	0.674761	0.67011	0.671307	0.784409	0.742493	0.760961	0.718591	0.756304	0.75968	0.00012806	0.0169039	0.0737793	37	17	56314779	GGGAGCAACTGTCAGAAATTTATCAACCCCAAAACAGACTTCTTGGTTCG	F	LPO;LPO;LPO	NR_027647;NM_006151;NM_001160102	TSS1500;TSS1500;TSS1500									56314779	56314902	NC_000017.10
cg26053249	0.749416	0.725818	0.760873	0.757958	0.78014	0.772202	0.82471	0.811594	0.883836	0.791649	0.817805	0.859386	0.00171485	0.0426342	0.0737622	37	4	82603905	GAGCTTGGCTGTTCTAAGCCTTGACTTCTATAGGGACCATCCCTTCAGCG	F							TRUE					82603905	82604028	NC_000004.11
cg00349071	0.773452	0.791976	0.759995	0.763872	0.745049	0.751567	0.870308	0.841118	0.832574	0.832419	0.820552	0.831405	1.96e-05	0.0093313	0.0737441	37	1	21788740	AGTCAATACTCATTCCCCAAATGAAGAATATATTCTGAATGTTGTCACCG	F	NBPF3	NM_032264	Body	chr1:21786445-21786713	S_Shelf							21788740	21788863	NC_000001.10
cg00463449	0.792983	0.758224	0.794973	0.790881	0.805556	0.799709	0.859602	0.824268	0.887171	0.850998	0.883449	0.879207	0.000176598	0.0187889	0.0737283	37	19	58038065	CGTGTGGGATAAGGGGATGCTGACCCCACTGTTAGTGATCACCTTGGTTG	F	ZNF549	NM_153263	TSS1500	chr19:58038572-58039208	N_Shore							58038065	58038188	NC_000019.9
cg15822656	0.773695	0.780062	0.794533	0.771397	0.785082	0.776795	0.813823	0.872443	0.853408	0.860239	0.855804	0.868174	0.000126386	0.016877	0.0737211	37	7	30321030	CGGGGACCACAGCCTCTCTACAGGGCTGTCCTGCAGCCAGCAGTAGCCCT	R				chr7:30323917-30325641	N_Shelf							30321030	30321153	NC_000007.13
cg15611417	0.727107	0.750708	0.794492	0.803176	0.766976	0.783067	0.813682	0.825752	0.844059	0.86198	0.837649	0.884705	0.000860701	0.0330928	0.0737169	37	13	20798653	GTATAACCAAGCCCACGTTGGCTTTGCCTCCCCAGCGGGTCCTGTTTGCG	R	GJB6;GJB6;GJB6;GJB6	NM_001110220;NM_001110219;NM_001110221;NM_006783	5'UTR;5'UTR;5'UTR;5'UTR									20798653	20798776	NC_000013.10
cg00147638	0.738352	0.768865	0.73821	0.810259	0.805777	0.800276	0.837929	0.820419	0.875015	0.824649	0.868843	0.877142	0.0018497	0.043916	0.0737095	37	1	25228039	CGCTGCTGGCAGAGATGGTTTGAGAACACATCCAAGCCAGTCCCCCCAGC	R	RUNX3;RUNX3	NM_004350;NM_001031680	3'UTR;3'UTR	chr1:25228496-25229132	N_Shore				1:25228033-25228423	Gene_Associated		25228039	25228162	NC_000001.10
cg17819264	0.834272	0.807443	0.760855	0.756714	0.783357	0.81345	0.842063	0.891691	0.839526	0.866203	0.872603	0.885377	0.0010215	0.0352034	0.073562	37	8	109299286	CGGCAACAACTGGATAAGCCTAAATTGGTAGTTGTTGTCCTATGATATGG	R							TRUE					109299286	109299409	NC_000008.10
cg00319661	0.80326	0.760944	0.824444	0.830816	0.840534	0.855691	0.895353	0.906183	0.898313	0.860086	0.893691	0.903162	0.00168787	0.0423724	0.0735168	37	5	2632178	CGGCGCTCCAAGAGAGCCCAGGCGTCCGGAGCACAACACCAGCCTCCATT	F								5:2685143-2685205				2632178	2632301	NC_000005.9
cg09362273	0.757621	0.780166	0.752343	0.799607	0.770451	0.7994	0.873535	0.835953	0.837883	0.853228	0.868874	0.830931	6.17e-05	0.0132063	0.0734693	37	1	108286027	CTTTAACCCCATTTACTTAAGGATCAACATACAGAGTCCCAAGAATTACG	F	VAV3	NM_006113	Body				TRUE					108286027	108286150	NC_000001.10
cg19003975	0.344281	0.32286	0.35261	0.331767	0.33771	0.296839	0.379014	0.372309	0.417485	0.440843	0.449114	0.36793	0.00255224	0.0497145	0.0734381	37	8	35392042	ATGTAGAACCATCAACCCAAAGTTTCTCAAGCAGAAGACCAGAGTAAACG	F	UNC5D	NM_080872	Body				TRUE					35392042	35392165	NC_000008.10
cg02368508	0.592026	0.583924	0.630521	0.583754	0.579105	0.639314	0.681606	0.665125	0.670795	0.660777	0.68561	0.684875	0.000510541	0.0273946	0.0733574	37	16	12060182	AAATAGATTTCAAAGATTCACCATCAAACCAACCTGTGTTTTTAAACTCG	F	TNFRSF17	NM_001192	Body									12060182	12060305	NC_000016.9
cg09921555	0.740947	0.727681	0.779551	0.718398	0.74777	0.715188	0.800863	0.786044	0.792175	0.801291	0.811513	0.877525	0.00177752	0.0432685	0.0733126	37	20	43590026	CGTATGATCAGCTTTCAGAATGGATGAAGATCTTTCACAGAGTGTGACTT	F	TOMM34	NM_006809	TSS1500	chr20:43588720-43589230	S_Shore							43590026	43590149	NC_000020.10
cg22021975	0.688622	0.689661	0.649497	0.655974	0.698391	0.696241	0.709608	0.775644	0.779972	0.753789	0.733737	0.765444	0.000465321	0.0266205	0.0733015	37	6	30953064	CGAGTTATATGTAGCTCAAATACATAAGAGCTCCCAGGAATAAGGGCTGT	R	MUC21	NM_001010909	Body									30953064	30953187	NC_000006.11
cg08437461	0.182702	0.208546	0.216084	0.209998	0.20308	0.225545	0.283524	0.272467	0.268227	0.294867	0.284333	0.282263	3.57e-06	0.00547341	0.0732877	37	X	102611373	TGCACACGTCGACTCCTGGTCACATGAGATCTACGTCACCAGTGAGCTCG	F	WBP5;WBP5;WBP5;WBP5	NM_001006613;NM_001006614;NM_016303;NM_001006612	TSS200;TSS200;TSS200;TSS200								TRUE	102611373	102611496	NC_000023.10
cg23720125	0.783775	0.822444	0.740767	0.774704	0.750273	0.762559	0.839834	0.860271	0.836326	0.862162	0.832187	0.84239	0.000847352	0.0329271	0.0731079	37	5	177097760	CGGACATAATAGATGCACAATAAATATTTGTTGGATGAAGGAACGATTGA	R	LOC202181	NR_026921	Body	chr5:177098634-177099525	N_Shore							177097760	177097883	NC_000005.9
cg09443388	0.109415	0.0761164	0.100555	0.0882945	0.0944532	0.0817253	0.203046	0.162201	0.183135	0.13279	0.160715	0.147217	0.000314943	0.0230651	0.0730906	37	8	56131518	CGAGACAAATATCTATCTGAACCTTGGAGGTGTTTCAAATGCCTGCTCTT	R	XKR4	NM_052898	Body				TRUE					56131518	56131641	NC_000008.10
cg21946631	0.660433	0.630317	0.664245	0.657575	0.652746	0.696189	0.737153	0.736745	0.755988	0.738009	0.75647	0.675188	0.000876038	0.0333092	0.0730081	37	7	90879360	CGTGGGGAGGGTTCCAGCTCTGCCAGTTCAAGTTTGCCCAATCCTGTTAG	F							TRUE					90879360	90879483	NC_000007.13
cg10156055	0.208791	0.160765	0.215336	0.159986	0.196529	0.202087	0.282247	0.228598	0.287329	0.263417	0.246521	0.273271	0.000302963	0.0227976	0.0729817	37	2	86440464	CTAGTTAATCCTAGTTCTGTTGACATTGGACCAGGCTCAGTAAATAAACG	R	MRPL35;MRPL35	NM_016622;NM_145644	3'UTR;3'UTR				TRUE					86440464	86440587	NC_000002.11
cg13957321	0.730398	0.70903	0.759038	0.66977	0.711541	0.714724	0.808431	0.769838	0.788475	0.772603	0.813748	0.778803	0.000721511	0.031	0.0728996	37	17	43675089	CGCAACAAGGTGAAAATAAGTCTAAGAAAAAAATAACTTACAGTTTTTCC	F				chr17:43678854-43679702	N_Shelf							43675089	43675212	NC_000017.10
cg17894779	0.576891	0.603374	0.593436	0.581621	0.590187	0.562214	0.611142	0.65889	0.680742	0.660651	0.63981	0.693836	0.000848865	0.032945	0.0728913	37	3	60066405	CGGGGACTTTATGAATTCAAACAGGCTCAGACAGACTGGCAATTTCGTGC	R	FHIT;FHIT	NM_001166243;NM_002012	Body;Body				TRUE					60066405	60066528	NC_000003.11
cg16314538	0.740283	0.689526	0.67808	0.665203	0.688753	0.695913	0.745897	0.765779	0.800731	0.770226	0.735369	0.77708	0.000430893	0.0258279	0.0728875	37	18	11685789	CGTTGTTTTTCAGCAGTTCAACTGTGTCGTTCTAGTGCCTTTTGGCCTTT	F				chr18:11689061-11690108	N_Shelf							11685789	11685912	NC_000018.9
cg18127957	0.480632	0.42799	0.490871	0.475314	0.495306	0.454322	0.49667	0.579282	0.530665	0.529176	0.584677	0.54127	0.00192844	0.044578	0.0728844	37	10	128072709	TGATGTGATCGGGGACCCAAGCACTTTCTTTTATTTCTATCTGCGATACG	F	ADAM12;ADAM12	NM_003474;NM_021641	Body;Body	chr10:128076155-128077482	N_Shelf							128072709	128072832	NC_000010.10
cg10894063	0.653212	0.6187	0.631926	0.588226	0.611069	0.634379	0.672207	0.677172	0.74419	0.686134	0.66596	0.72909	0.00153649	0.0408366	0.0728732	37	2	58722314	CGAGGCCACGCTGAGGAGCCAAAAAGGCACTGGCTAGTGGAGCTCCCCCT	R							TRUE					58722314	58722437	NC_000002.11
cg10521596	0.707409	0.737371	0.694882	0.714531	0.682772	0.704408	0.765655	0.751304	0.735151	0.821022	0.795022	0.81031	0.00198792	0.0450947	0.0728485	37	12	127599623	CGCATTCACACACTGGCAGAAAGAAAGAAGTAGAAAATAGAAGCCTACAA	R							TRUE					127599623	127599746	NC_000012.11
cg07925900	0.167546	0.0966579	0.11698	0.145429	0.122899	0.142244	0.186164	0.244702	0.229781	0.160577	0.187237	0.22031	0.00149923	0.0404656	0.0728358	37	17	74554786	CGCTGGTTACAATGACACCTAGTGGCCCCAAATCACACGGGCAAAGACGC	R	SNORD1C	NR_004397	TSS200	chr17:74553220-74553912	S_Shore				17:74554643-74555031	Promoter_Associated		74554786	74554909	NC_000017.10
cg03611632	0.823634	0.745401	0.738361	0.762543	0.763652	0.763195	0.849457	0.831318	0.835657	0.839734	0.814268	0.863105	0.000915113	0.0337734	0.0727924	37	5	148932063	CGACTGAGGTCTGACTTAAGATGATAGCATCAACCATGGAGTTTTCTTTC	R	CSNK1A1;CSNK1A1	NM_001892;NM_001025105	TSS1500;TSS1500	chr5:148930249-148931244	S_Shore							148932063	148932186	NC_000005.9
cg03687929	0.583738	0.581135	0.590773	0.571871	0.567449	0.584398	0.597907	0.639269	0.675116	0.672357	0.667499	0.663895	0.00131007	0.0385165	0.0727798	37	9	79007938	GACTCCTACAACTTTGCCTGTAAGTATCAATCCCATCCTTCCATTTTCCG	R	RFK	NM_018339	Body	chr9:79008637-79009762	N_Shore							79007938	79008061	NC_000009.11
cg12509357	0.709212	0.736733	0.729627	0.730176	0.735463	0.763842	0.817479	0.784433	0.82664	0.78411	0.816513	0.812495	3.52e-05	0.0113818	0.0727694	37	15	86805179	CGGGAGAGAAATTATATCAATCCTTATGAGACCTGGGGAGGAGCTGGTAT	R	AGBL1	NM_152336	Body									86805179	86805302	NC_000015.9
cg23054188	0.585342	0.556373	0.601487	0.577174	0.585459	0.524042	0.645874	0.656303	0.653989	0.665263	0.606748	0.638304	0.000529997	0.027762	0.0727672	37	5	115886970	CGGGCATATTTGGCTGTTATTGCCTACGTTATCCATTTTGACACCTCCCC	R	SEMA6A	NM_020796	5'UTR				TRUE					115886970	115887093	NC_000005.9
cg14178343	0.268777	0.312123	0.275089	0.321897	0.315017	0.268312	0.353945	0.374588	0.348997	0.346659	0.403441	0.369985	0.000343613	0.023747	0.0727335	37	7	159025011	AAGAGGCTATAGTCCATTATCTCAAAGATCTGCAGCACCAAACAGCCACG	F				chr7:159023681-159023985	S_Shore							159025011	159025134	NC_000007.13
cg06748315	0.793752	0.757457	0.774903	0.760671	0.751484	0.788094	0.863414	0.830267	0.845269	0.844521	0.832664	0.846513	1.52e-05	0.0087425	0.0727144	37	21	31864089	CGGATATGGCTGCTACCGCCCATCATACTATGGAGGATATGGATTCTCTG	R	KRTAP19-3	NM_181609	1stExon									31864089	31864212	NC_000021.8
cg12083597	0.714824	0.660599	0.732696	0.695563	0.678137	0.64388	0.768975	0.739677	0.725898	0.779198	0.793807	0.753957	0.0019852	0.0450689	0.0726359	37	10	26858394	CGTATACCTGAGTAGGATTATTTAGATCCTGAAAATGCAGCAAAATTTGT	F				chr10:26855906-26856198	S_Shelf							26858394	26858517	NC_000010.10
cg20193872	0.655748	0.63357	0.658414	0.634149	0.636544	0.71831	0.741777	0.746462	0.727447	0.684769	0.735749	0.736301	0.00150197	0.0405002	0.0726285	37	12	107488596	CGGTAGTGTGAAAAGTGATGTAACAGAAACATACTTGGAGAACCCAGGGA	R	CRY1	NM_004075	TSS1500	chr12:107486612-107487811	S_Shore							107488596	107488719	NC_000012.11
cg03227783	0.582738	0.62076	0.638698	0.615608	0.62239	0.645932	0.635934	0.698649	0.727041	0.714927	0.666227	0.719072	0.00253408	0.0496065	0.0726207	37	6	33091141	CGCCTACAACCATGGGTGGTACATTTAACACGTTGCCAGGACCCAGGAAC	R	HLA-DPB2	NR_001435	Body									33091141	33091264	NC_000006.11
cg00055771	0.634515	0.623725	0.670255	0.654801	0.63402	0.678672	0.718486	0.729418	0.743099	0.6831	0.713989	0.743129	0.000217756	0.020254	0.072539	37	5	144510462	CTCCCATTCAGCTGACATTCTTTCTCTTGATTCTTCTGCCTTCTCATTCG	F							TRUE					144510462	144510585	NC_000005.9
cg01820962	0.811829	0.75417	0.81634	0.756002	0.78587	0.829687	0.889469	0.838711	0.857898	0.859506	0.860928	0.882608	0.00138297	0.0393863	0.0725367	37	6	116511817	ACCCCATGCAGAAAGCCTCTACTTTTACACAACTCTGCTTTATTGGATCG	R	NT5DC1	NM_152729	Body				TRUE					116511817	116511940	NC_000006.11
cg13219008	0.788086	0.773448	0.742135	0.732349	0.728812	0.729675	0.826691	0.835833	0.846224	0.792838	0.846886	0.781211	0.000871925	0.0332855	0.0725296	37	19	9695776	CGCAATGGAACCAGCAGGTTCTAAAAAATAAAGAATGAAGAAATAAAGGC	R	ZNF121	NM_001008727	TSS1500	chr19:9694921-9695433	S_Shore							9695776	9695899	NC_000019.9
cg02480685	0.734627	0.742222	0.74078	0.679918	0.731064	0.692813	0.782145	0.761102	0.797032	0.796104	0.783872	0.836317	0.000688744	0.0303957	0.0725247	37	8	96163530	CGATATGTTCAAATGGGTGGACTCAGTAGTTGATTCAGGTGGAGAGAAAT	F	PLEKHF2	NM_024613	5'UTR				TRUE					96163530	96163653	NC_000008.10
cg23168192	0.156791	0.217197	0.165196	0.194554	0.134251	0.199457	0.232069	0.282062	0.233485	0.25493	0.269338	0.230521	0.00115194	0.0367331	0.0724932	37	14	23624788	CCAGGGTGGCATGGCAGGCCACCCTGGATTTCTTGGTGTCCAGTTTTTCG	F	SLC7A8;SLC7A8	NM_012244;NM_182728	Body;TSS1500				TRUE		14:23624750-23624898	Unclassified_Cell_type_specific	TRUE	23624788	23624911	NC_000014.8
cg17897391	0.530899	0.505107	0.52705	0.522712	0.496032	0.536463	0.592531	0.557763	0.616871	0.560742	0.631246	0.593214	0.000821107	0.032516	0.0723504	37	8	24297103	CGGAGGAAAAGAGGGTGTTTAATAAATACCTCAAGGAACTCAAAAATTTA	F	ADAM7	NM_003817	TSS1500									24297103	24297226	NC_000008.10
cg24768595	0.102364	0.117558	0.133916	0.147195	0.149584	0.111823	0.18842	0.171491	0.24677	0.172294	0.214492	0.202998	0.000684112	0.0302953	0.0723374	37	17	76677111	CGGGGCTCCTTATCCTACAGAACAGTTGAAGAGAGGAAGTTTAAGATCAC	F	CYTH1;CYTH1	NM_017456;NM_004762	Body;Body				TRUE				TRUE	76677111	76677234	NC_000017.10
cg01581024	0.147211	0.124516	0.136352	0.0730722	0.106457	0.151339	0.248007	0.205145	0.178967	0.163848	0.192138	0.184799	0.0016246	0.0417016	0.0723262	37	8	142009794	TCATCCGTGTGCTTGCATCGCACTGCTCATAAGTTTTCAAATATGGGACG	R	PTK2;PTK2	NM_005607;NM_153831	5'UTR;5'UTR	chr8:142010440-142011907	N_Shore	RDMR						142009794	142009917	NC_000008.10
cg04248979	0.56608	0.527638	0.518859	0.550502	0.503684	0.561854	0.595543	0.624865	0.622943	0.609365	0.599766	0.610015	0.000353935	0.023951	0.0723131	37	5	178358274	CCTTTCCATTGTTACCCCATGGCATAAATCTTCAGTAATACCCGGCTTCG	F	ZFP2	NM_030613	5'UTR									178358274	178358397	NC_000005.9
cg01837198	0.622623	0.692095	0.719016	0.698821	0.708075	0.703029	0.774512	0.776176	0.730372	0.780862	0.745615	0.769706	0.00216628	0.0466638	0.0722639	37	1	234490748	CGGAATGGAGGGCAGGTGCACAGAAAAATGGCTTAAAATTTGGACTTCCT	F				chr1:234492484-234492860	N_Shore							234490748	234490871	NC_000001.10
cg04319042	0.848199	0.825785	0.861031	0.843672	0.7856	0.873377	0.885082	0.873298	0.914319	0.909666	0.929919	0.958773	0.00232115	0.0480019	0.0722323	37	11	23752001	CGGGACTAAAGGATCAAGCTGAAGTGAATGTGTAGCCCTGTGACCTCAGC	F				chr11:23751953-23752361	Island			11:23708469-23708937				23752001	23752124	NC_000011.9
cg25887844	0.518378	0.48909	0.53358	0.531083	0.552465	0.495632	0.593086	0.613314	0.605937	0.579069	0.589373	0.572752	0.000207478	0.0198429	0.0722173	37	2	68961495	CGACCCACTCACATATCCTAAGGGTTCTTTGGCATTGTACACAGGGTGTG	R	ARHGAP25;ARHGAP25	NM_001166277;NM_001007231	TSS1500;TSS1500						2:68961479-68961667	Promoter_Associated_Cell_type_specific		68961495	68961618	NC_000002.11
cg25773630	0.716717	0.663141	0.701798	0.664557	0.685647	0.71862	0.724586	0.770821	0.750267	0.763843	0.798108	0.775896	0.000501537	0.0272433	0.0721736	37	10	25890685	CGCAAACATTTGCTAGGTTGTCCTTCTCAATGCATGTGCAGGCTGCATCC	F	GPR158	NM_020752	3'UTR									25890685	25890808	NC_000010.10
cg09242008	0.753609	0.689077	0.74535	0.714217	0.726903	0.756089	0.810027	0.79115	0.809913	0.775934	0.814046	0.81716	0.000362903	0.0241789	0.0721641	37	3	108839099	CGGTAGGTTCAAAACATCAGTTTTTTATGCTTATGAAATTTGTCTTGAGT	R				chr3:108836795-108837089	S_Shelf							108839099	108839222	NC_000003.11
cg26512635	0.740756	0.706484	0.725371	0.690024	0.718407	0.761883	0.812379	0.776832	0.832292	0.741141	0.824698	0.788434	0.0023477	0.0481705	0.0721422	37	7	78060103	CCCCCTAAGCAACCACTAGTCCTTTACGTCTTGAAATCTTTAGGCCTTCG	R	MAGI2	NM_012301	Body				TRUE					78060103	78060226	NC_000007.13
cg17680767	0.570429	0.597359	0.556427	0.590071	0.581621	0.571241	0.635004	0.617314	0.677902	0.67408	0.667006	0.628379	0.000383396	0.0247564	0.0720895	37	5	73623208	GAGTTATGGCCTGGTTTACCTGTACAGTGTCCCTCAGTAGAACTATAACG	R							TRUE				TRUE	73623208	73623331	NC_000005.9
cg27129724	0.651984	0.652609	0.660457	0.65321	0.627586	0.690294	0.739022	0.705953	0.72018	0.72686	0.694458	0.781993	0.00108449	0.0359233	0.0720544	37	6	53217374	ATTATCTTGCTGCCCAGAATTCCCACAGGCCACCTGGCTTGTCTTTGTCG	R				chr6:53212617-53214043	S_Shelf							53217374	53217497	NC_000006.11
cg12134602	0.570176	0.627725	0.595578	0.634336	0.588398	0.600543	0.667962	0.644544	0.695259	0.64935	0.686843	0.704894	0.000477013	0.0268864	0.072016	37	7	129856472	CGAAGAATTGTGTGAGATTTTACCTCTTGGGTTCCAAGTATGTTTTTGTT	R	C7orf45	NM_145268	3'UTR									129856472	129856595	NC_000007.13
cg16308286	0.820861	0.775337	0.802134	0.830299	0.79548	0.813122	0.887811	0.874083	0.88648	0.839683	0.880948	0.900128	0.000106232	0.0159588	0.0719834	37	8	53490251	CGCAATTACCTGCTAATCTGTTTAAGTGCAACGTGAGGTCCCAGAAGGAG	R							TRUE		8:53490146-53490814	Unclassified	TRUE	53490251	53490374	NC_000008.10
cg18545992	0.406068	0.364963	0.404292	0.358893	0.400295	0.420016	0.437525	0.469396	0.429168	0.473723	0.476835	0.499724	0.000643925	0.0296681	0.0719738	37	2	133013028	CGGTGCCCCCTGGATGCTCTTAGCTGAGTGTCCTGTGGCCCGAAGCACTT	R	NCRNA00164	NR_027020	Body	chr2:133013777-133015740	N_Shore			2:132729410-132729562	2:133011759-133013592	Unclassified		133013028	133013151	NC_000002.11
cg22216431	0.447076	0.481339	0.464097	0.447796	0.418082	0.482107	0.52971	0.545128	0.501191	0.525134	0.529048	0.541877	0.000228799	0.0204984	0.0719316	37	12	2934991	CGTGCCATCGGACTCCAGCCTGGGTGAAGGAGTGAGACCCTGTCTCCAAA	R	NRIP2	NM_031474	3'UTR				TRUE					2934991	2935114	NC_000012.11
rs1416770	0.786613	0.769311	0.792633	0.778832	0.79698	0.791778	0.870733	0.840495	0.875301	0.854235	0.86857	0.838336	9.79e-06	0.00753008	0.0719206																				rs1416770
cg26178251	0.702913	0.675209	0.724002	0.699593	0.731294	0.757508	0.750635	0.817665	0.764645	0.812877	0.804948	0.771238	0.00139887	0.0395543	0.0719147	37	2	12146691	GACAGACATTTACCGAGTGCTCACAAAAGGCCAGGCATTTCTGCAACACG	F							TRUE					12146691	12146814	NC_000002.11
ch.3.1904198F	0.111486	0.0781933	0.129457	0.0896721	0.0940405	0.114954	0.194299	0.171497	0.205105	0.155578	0.153458	0.169321	9.7e-05	0.0153872	0.071909	36	3	94136090	CAGGAGCTAAGTTGAGCTCTAATATAAACTAATCTCCTAAGTTAGAAAAA	F												94136090	94136213	NC_000003.11
cg04118610	0.350511	0.370535	0.325566	0.382609	0.377374	0.399089	0.452599	0.432095	0.441124	0.406991	0.412647	0.491457	0.00147262	0.0402289	0.0718713	37	4	62707027	CGTGAGCCTCCAGCTTATTGGAATAACCTGGTAGCGATCAACAATTTTCA	R	LPHN3	NM_015236	Body				TRUE					62707027	62707150	NC_000004.11
cg11295935	0.674057	0.640437	0.681623	0.681903	0.680819	0.628317	0.72265	0.755797	0.779806	0.709783	0.714879	0.734711	0.000662677	0.0299251	0.0717449	37	3	87018446	TATTCTCCCCAAACAGGGGTGAATTGATACCAGGTTGGCCTCTGGGCTCG	R	VGLL3	NM_016206	Body				TRUE					87018446	87018569	NC_000003.11
cg03732014	0.737967	0.69952	0.74381	0.713105	0.704516	0.761825	0.776471	0.767468	0.823956	0.780014	0.817022	0.826124	0.000701555	0.0306146	0.0717186	37	21	30676184	CGTGAGGAAGAAGAAATAGTGGTAGCCAGAATCTTGGTTGTTAATGACCA	F	BACH1;BACH1;BACH1	NM_206866;NR_027655;NM_001186	5'UTR;TSS1500;5'UTR									30676184	30676307	NC_000021.8
cg10645578	0.200279	0.202098	0.240055	0.218245	0.221966	0.251907	0.265921	0.29084	0.276638	0.31938	0.328882	0.28311	0.000314669	0.0230623	0.0717037	37	X	47863501	CATCTGGCCTGGAGCAGTGACGTCACCGGCAAGGCTACCTTCCCTCTGCG	F	ZNF182;ZNF182;SPACA5	NM_006962;NM_001007088;NM_205856	TSS200;TSS200;TSS1500	chrX:47863379-47863596	Island			X:47748137-47748828	X:47863207-47863743	Promoter_Associated		47863501	47863624	NC_000023.10
cg17744375	0.741582	0.760276	0.72562	0.736911	0.732098	0.716939	0.805458	0.795928	0.828426	0.841294	0.79286	0.779625	0.000168789	0.0184346	0.0716942	37	7	4243286	CGGAGAAGGAGAGTTGCACCGGGGCTTGTCAATGGCAGAGCCTTCCTGAA	F	SDK1;SDK1	NR_027816;NM_152744	Body;Body					7:4209805-4209945				4243286	4243409	NC_000007.13
cg09614932	0.24685	0.155392	0.193543	0.17814	0.199533	0.217043	0.303071	0.266807	0.265199	0.243386	0.27916	0.262871	0.00132662	0.0386775	0.0716655	37	3	74337905	CGTGGGAGCTTTCATTCCTCAGGCACCCAGGATCCATGAACTTAAAGCCT	F	CNTN3	NM_020872	Body									74337905	74338028	NC_000003.11
cg13153708	0.304428	0.312541	0.28584	0.313605	0.272955	0.301527	0.394361	0.385143	0.347321	0.330885	0.358096	0.405027	0.000815824	0.0324527	0.0716563	37	14	65078521	CGGCATAAAGCTCAGATAACCAACTGCAGTTCTTGGAAATAATTAAAATG	F							TRUE					65078521	65078644	NC_000014.8
cg08597393	0.822626	0.761479	0.778357	0.780189	0.768985	0.780875	0.835032	0.846102	0.832757	0.846642	0.869684	0.892216	0.000229118	0.0205136	0.0716538	37	16	16324986	ACATTGACCTCAGGGTCATAATCATGAGCGCATCTGATTTCAGTTTCTCG	F	NOMO3	NM_001004067	TSS1500	chr16:16326458-16326856	N_Shore							16324986	16325109	NC_000016.9
cg21963768	0.672285	0.654702	0.716871	0.671569	0.691483	0.688314	0.747331	0.692756	0.772959	0.751238	0.762461	0.798348	0.00257888	0.0498964	0.0716447	37	1	235818030	CGAAGGAAGAAAGGAAGCAAGCATCACAGGCCGGATGGACAGATACTATG	R				chr1:235811841-235814066	S_Shelf							235818030	235818153	NC_000001.10
cg20452230	0.122715	0.109734	0.120717	0.0996567	0.103062	0.145923	0.218617	0.180417	0.221767	0.139511	0.200629	0.170419	0.00133743	0.038839	0.0715922	37	5	137475379	TGGGCATAGAGGGCACAGCATCATCTGGTGAAACGAAGGTATCTGACACG	F	NME5	NM_003551	TSS1500									137475379	137475502	NC_000005.9
cg11344574	0.517282	0.590756	0.566496	0.558901	0.538111	0.546478	0.636307	0.63148	0.640219	0.621402	0.627193	0.590925	0.000303384	0.0228001	0.0715839	37	1	152196415	CGCTTCCCTTATAACATGGATATCATGGGGTTCTAATTATCCACAGGCAG	R	HRNR	NM_001009931	5'UTR									152196415	152196538	NC_000001.10
cg03162994	0.247531	0.282493	0.309443	0.284775	0.284553	0.312058	0.367399	0.340113	0.347024	0.362627	0.374869	0.358026	0.000194876	0.0193993	0.0715343	37	18	23713729	GAATGCCGTCAACTCACAGGCACTGCTTGGGTGACAAAGGCTGGCAAGCG	R	PSMA8;PSMA8;PSMA8	NM_144662;NM_001025097;NM_001025096	TSS200;TSS200;TSS200	chr18:23713728-23713953	Island			18:21967624-21968062	18:23713712-23714394	Unclassified_Cell_type_specific		23713729	23713852	NC_000018.9
cg21595968	0.170425	0.165282	0.212516	0.170935	0.193686	0.236785	0.250622	0.248825	0.227501	0.275253	0.284027	0.292561	0.000969409	0.0345129	0.0715268	37	X	150396241	TGGGTGGGTTTAACTCAGCTAGCAGCTGCGGCGGTCTTGGCGCGCTCTCG	R				chrX:150396220-150396447	Island			X:150146879-150147105				150396241	150396364	NC_000023.10
cg18020065	0.216763	0.247901	0.244149	0.277579	0.260917	0.29347	0.327336	0.325686	0.372476	0.353583	0.293285	0.297323	0.00171478	0.0426342	0.0714851	37	13	114829733	CGTGGGCAGAATGGCCTACGCCCCATGTCCTCCCAGCCCCACCCAGAACC	F	RASA3	NM_007368	Body			RDMR			13:114829673-114829808	Promoter_Associated_Cell_type_specific		114829733	114829856	NC_000013.10
cg01813071	0.0774456	0.0419064	0.0751419	0.0586537	0.0461025	0.0628221	0.142971	0.137934	0.150154	0.0711221	0.130013	0.158468	0.00140441	0.0396149	0.0714316	37	11	102401616	CGAGGAAGTATTACATCGTTATTGGCAGGAAGCACACAATGTATTTGTCT	F	MMP7	NM_002423	TSS200									102401616	102401739	NC_000011.9
cg14441948	0.703931	0.677435	0.727911	0.683081	0.707161	0.736013	0.81317	0.755266	0.732636	0.758887	0.795083	0.808999	0.00189412	0.0442577	0.0714182	37	4	99125084	ATTAAAAATCTTGAGCAGAACCACCTCAATCTGTCAGAAATTTTCTAACG	F							TRUE		4:99124858-99125470	Unclassified		99125084	99125207	NC_000004.11
cg21099332	0.709033	0.680094	0.694586	0.705599	0.716634	0.72346	0.77484	0.744424	0.756323	0.758875	0.803642	0.819471	0.000913647	0.0337486	0.0713613	37	5	39270715	ACTCTGCATAGCTAACTTGCACATTCACTATCCAAGCTGCACCATCTTCG	F												39270715	39270838	NC_000005.9
cg17991347	0.191091	0.14183	0.149497	0.177915	0.170337	0.180761	0.225195	0.241732	0.231511	0.215003	0.245205	0.280905	0.000179862	0.0188575	0.0713535	37	X	51546132	CGGCTGCAGAAGCTAAAGCTTCCGCCAAACAAAAGAGGACAGCACTTCCG	F	MAGED1	NM_001005332	TSS200					X:51562872-51562948	X:51545950-51546244	Promoter_Associated_Cell_type_specific		51546132	51546255	NC_000023.10
cg16259591	0.462357	0.412265	0.461796	0.444492	0.460394	0.44618	0.562724	0.514593	0.481804	0.489981	0.543975	0.522479	0.00120632	0.0373641	0.0713454	37	10	118305388	AAAATTAGAAACACATCCTTGGGCCTTTCTTTGCATGCCATTTTTCCACG	R	PNLIP	NM_000936	TSS200									118305388	118305511	NC_000010.10
cg24804145	0.689276	0.740361	0.676109	0.669302	0.734363	0.730971	0.795687	0.728858	0.781698	0.779913	0.774791	0.807431	0.00201899	0.045356	0.0713327	37	7	158144409	CGGCCCCACGGGAGGAGCCTTCTGAGTGACAGATATCATTTTCATTCAGG	F	PTPRN2;PTPRN2;PTPRN2	NM_002847;NM_130842;NM_130843	Body;Body;Body				TRUE					158144409	158144532	NC_000007.13
cg26266274	0.804619	0.78328	0.826497	0.819416	0.828871	0.830577	0.868959	0.866649	0.891938	0.897948	0.899107	0.896637	3.05e-05	0.0109853	0.0713298	37	9	132482399	CGGCTCAGTGCTGGCACAGAGTTAAGAACTTGAAACTGGAAAAGGACTTC	R	PRRX2	NM_016307	Body	chr9:132482398-132482638	Island			9:131522220-131522459	9:132482349-132483812	Unclassified_Cell_type_specific		132482399	132482522	NC_000009.11
cg09010107	0.797924	0.765831	0.778759	0.765828	0.791912	0.81088	0.875096	0.860288	0.855925	0.865605	0.817686	0.864467	7.7e-05	0.0142781	0.0713225	37	1	170638807	CGCAGACCCCTAACTCCTGGAAAACCCTCCTTGGCGGAAGCACTAGGGCC	F	PRRX1;PRRX1	NM_022716;NM_006902	Body;Body					1:168905431-168905562				170638807	170638930	NC_000001.10
cg18716831	0.692725	0.665377	0.689401	0.654238	0.66565	0.66897	0.764066	0.745218	0.729767	0.725265	0.738649	0.761142	1.28e-05	0.00827199	0.0712906	37	8	144335905	CGGGTCACGGGGACAGATCCCTCGAGAATGGCTTGGTGCCCTCCTCACAG	F	ZFP41	NM_173832	3'UTR	chr8:144337536-144338585	N_Shore			8:144406134-144407288				144335905	144336028	NC_000008.10
cg02095553	0.572264	0.538032	0.547408	0.532921	0.551409	0.584483	0.60325	0.620611	0.626185	0.641995	0.631593	0.630586	5.83e-05	0.01297	0.0712838	37	9	134428624	AGAACACTCACATTGTTGTGCAGGCATCACCACTATCCATCTCTGGGACG	R				chr9:134429866-134430491	N_Shore							134428624	134428747	NC_000009.11
cg11285496	0.82293	0.790537	0.831338	0.803216	0.771221	0.813315	0.892165	0.87674	0.891099	0.84189	0.91051	0.847503	0.000605978	0.0290004	0.0712251	37	5	81882123	TGGCTCTCATTCAAGACTCTGTCAGCTTTGTTACCACAGTATGTCTTTCG	F							TRUE					81882123	81882246	NC_000005.9
cg09109411	0.684477	0.650316	0.683863	0.672363	0.670163	0.700163	0.72025	0.73089	0.743696	0.783551	0.784923	0.725201	0.000828062	0.0326506	0.0711944	37	5	149319112	CGACCATTTTGCTACTGTTATTGTTGTCGTTGTTAAGGATCTATTCTAAG	R	PDE6A	NM_000440	Body									149319112	149319235	NC_000005.9
cg01053349	0.576642	0.581015	0.631228	0.616838	0.660188	0.626571	0.659416	0.679801	0.72939	0.667285	0.682452	0.701189	0.00179341	0.0433981	0.0711752	37	Y	3446859	CGGGAAGAACAATACCAGAGTAAAATCAAATAGGAAGAAAGTGATAGGCG	F	TGIF2LY	NM_139214	TSS1500									3446859	3446982	NC_000024.9
cg13160852	0.160978	0.198346	0.17313	0.180572	0.206174	0.204905	0.221265	0.239754	0.225487	0.29692	0.279578	0.287844	0.0019964	0.0451832	0.0711236	37	11	122047028	CGTTGCTAGAATGAATGTCAACTTTACAGTTGGGCTGTGCCTCTTGGTCA	F	LOC399959	NR_024430	Body				TRUE					122047028	122047151	NC_000011.9
cg02051553	0.555852	0.520955	0.542911	0.545218	0.51294	0.576001	0.616008	0.604131	0.630727	0.575507	0.601456	0.652757	0.000604508	0.0289796	0.0711179	37	1	10044519	TTCAAAGTGGAAGTTCTGTCCTTGAGGACACCCAAAATTATGCTATTACG	F	NMNAT1	NM_022787	3'UTR									10044519	10044642	NC_000001.10
cg27452255	0.768744	0.766486	0.761357	0.807193	0.789756	0.779344	0.85257	0.842834	0.857771	0.860915	0.855822	0.829479	1.77e-05	0.00908483	0.0710852	37	1	85686316	CAGGCTTATCCCTTTGTTTACTGAATCTTGAGTTCTAGCTGTTGTCTTCG	R							TRUE		1:85686226-85686358	Unclassified_Cell_type_specific		85686316	85686439	NC_000001.10
cg02024466	0.64126	0.604975	0.655193	0.653449	0.655983	0.672877	0.689984	0.704232	0.709998	0.723046	0.758553	0.724319	0.000350691	0.0238678	0.0710658	37	11	6277275	ATTCTGTTTCTACCTCCTAGATAGGTCTTAGATCAATCTTTTCCACTACG	R				chr11:6281076-6281307	N_Shelf							6277275	6277398	NC_000011.9
cg03560936	0.697166	0.678711	0.695516	0.662594	0.677959	0.65765	0.755217	0.746977	0.717803	0.781319	0.756194	0.738315	8.85e-05	0.0149511	0.0710383	37	19	36621529	CGCTCTGTAGGCTGGAGTGCATTGCTGTGATCTCAGCTCACTGCAACATC	R				chr19:36618727-36619133	S_Shelf							36621529	36621652	NC_000019.9
cg08166019	0.109525	0.0938646	0.0707813	0.0898053	0.0685691	0.0712169	0.174711	0.176179	0.157545	0.0956827	0.142703	0.183082	0.00175153	0.0430307	0.0710236	37	7	1264549	GAATGAATCCCCCTGCCCGTAAATAACAGAAGAGCTGCGTCCCGGTGCCG	R				chr7:1265111-1265379	N_Shore			7:1231044-1231088				1264549	1264672	NC_000007.13
cg14234213	0.828041	0.771188	0.816556	0.774311	0.829275	0.764325	0.87165	0.846855	0.888176	0.87327	0.861049	0.86883	0.00126791	0.0380841	0.0710222	37	3	98216372	ATGTTCAACCAATAGCCACAAAAGTAGTAGCCTCAGGAGACTCATTCTCG	R	OR5K2	NM_001004737	TSS200									98216372	98216495	NC_000003.11
cg07021181	0.661369	0.670929	0.693857	0.672208	0.679493	0.716099	0.714491	0.762389	0.786821	0.717247	0.774012	0.765066	0.00108556	0.0359467	0.0710116	37	11	122853573	TTCTCTCCCATCTCCCCATTTTTAAGCTCTAATTTGTTGAAATCTAGTCG	R	BSX	NM_001098169	TSS1500	chr11:122854930-122855582	N_Shore							122853573	122853696	NC_000011.9
cg22466653	0.567998	0.533956	0.559089	0.600785	0.591508	0.5964	0.623334	0.636875	0.679647	0.605793	0.659078	0.671029	0.00120343	0.0373511	0.0710035	37	17	56232357	CGGGGAGGAAGTTCCATATGTTTTCAAGGGTTCCAGAGACTTACTTCCCT	R	OR4D1	NM_012374	TSS200	chr17:56234321-56234827	N_Shore							56232357	56232480	NC_000017.10
cg11748880	0.10304	0.0839984	0.0760077	0.0475539	0.0523693	0.0732601	0.147786	0.146975	0.171407	0.0979699	0.138137	0.159785	0.000371499	0.0244098	0.0709718	37	15	49438392	CGCCCTCTGGAGGATAATTCCTTCCTCGTGTGAAGACCTGAGTCTGTCAG	F	COPS2;COPS2	NM_001143887;NM_004236	Body;Body				TRUE		15:49438164-49438551	Unclassified_Cell_type_specific		49438392	49438515	NC_000015.9
cg06440087	0.568223	0.525226	0.580864	0.554032	0.590386	0.586709	0.615597	0.643459	0.613904	0.626409	0.686568	0.645242	0.000799528	0.0322586	0.0709564	37	10	7745191	AGTAAGCAACTGCTTCTGACTTTGCTGTTTGAATAACCTCTGGGTGTTCG	R	ITIH2	NM_002216	TSS200									7745191	7745314	NC_000010.10
ch.12.1870160F	0.0894264	0.055626	0.0941671	0.0511843	0.0530871	0.0890897	0.117232	0.146522	0.182996	0.0989701	0.143081	0.169342	0.00137386	0.039288	0.0709271	36	12	95463242	CAGTACTCACTAAAGTAACATGCTGTGTGGGTTTGTAAATTAAGAGCAAC	F	NR2C1;NR2C1;NR2C1	NM_001032287;NM_001127362;NM_003297	5'UTR;5'UTR;5'UTR	chr12:95466650-95467464	N_Shelf							95463242	95463365	NC_000012.11
cg20957553	0.152382	0.139042	0.159277	0.0945843	0.0954785	0.151678	0.194159	0.173176	0.220243	0.216772	0.204158	0.209472	0.000911382	0.0337281	0.0709228	37	1	87791719	CGCATCAGTGGAAATAAAAGATTGACGTTGCTACCCACTCAACCAGGCAT	F				chr1:87793802-87795142	N_Shelf				1:87791512-87792029	Unclassified_Cell_type_specific		87791719	87791842	NC_000001.10
cg24001468	0.626695	0.665329	0.649544	0.703176	0.64581	0.638219	0.69321	0.720913	0.704336	0.731337	0.780839	0.723663	0.00166342	0.04216	0.0709208	37	2	62901049	CGCTGGAGTCTCTCTTTGGGGAGGGAGAGTCAGATGTTACCCACAAACTG	R	EHBP1;EHBP1	NM_001142615;NM_001142615	5'UTR;1stExon									62901049	62901172	NC_000002.11
cg04702045	0.0486721	0.041533	0.101785	0.058424	0.0747295	0.0927671	0.126	0.161456	0.116492	0.141488	0.150435	0.147252	0.000246034	0.0209902	0.070869	37	X	67653598	TTTTAGGCGCCGGAAGGGTTAAGCCAGGGCGGCAATGAAACGTAGCCTCG	R	OPHN1	NM_002547	TSS1500	chrX:67652946-67653907	Island			X:67569455-67570619			TRUE	67653598	67653721	NC_000023.10
cg10175753	0.707811	0.709315	0.668215	0.632326	0.647108	0.675967	0.73241	0.735376	0.78067	0.705039	0.768943	0.743421	0.00193782	0.0446509	0.0708527	37	19	50219606	TCATGTGTGCCTCACTGGCTGTTGGCAGGAGGTCTCAGTTCTTTACCACG	F				chr19:50222807-50223379	N_Shelf							50219606	50219729	NC_000019.9
cg10544627	0.647032	0.599052	0.621492	0.6465	0.598633	0.645827	0.733543	0.683417	0.716098	0.64872	0.690692	0.711144	0.00117849	0.0370246	0.0708462	37	14	97431263	AAAAAATGACAGTGCCAATGTCCCCTCCTGTACCCTGGAGTGTCATAACG	F								14:96501016-96501133				97431263	97431386	NC_000014.8
cg18499731	0.364992	0.414728	0.400257	0.396626	0.35143	0.36469	0.451472	0.412165	0.440226	0.444496	0.484274	0.485056	0.000981468	0.0346983	0.0708278	37	15	25522171	GCAGGCCTAACTGGTGAACTCCTCAATTATCTCACAATAGCACTATCACG	R	SNORD109B;SNORD109A	NR_001289;NR_001295	TSS1500;TSS1500									25522171	25522294	NC_000015.9
cg16797275	0.25888	0.237746	0.240327	0.20206	0.175705	0.255368	0.30616	0.315774	0.304919	0.295835	0.311351	0.260926	0.00178257	0.0433069	0.070813	37	12	50097773	CGGAACACAAGTGATCTCAGATCTGAGTCACTGCTGAGAGGTACAAACTT	F	FMNL3;FMNL3	NM_198900;NM_175736	Body;Body	chr12:50100442-50101587	N_Shelf				12:50097527-50098079	Unclassified_Cell_type_specific		50097773	50097896	NC_000012.11
cg14927321	0.764024	0.750422	0.708663	0.705531	0.731136	0.752998	0.796331	0.783617	0.80379	0.82977	0.816607	0.807363	0.000257679	0.0214404	0.070784	37	15	89491614	CGCAGTACCTTCTTGAGTATTGCAATGAGGGAGTTAAGCTGCCAAGCATG	R							TRUE					89491614	89491737	NC_000015.9
cg03965414	0.741883	0.760574	0.771136	0.748626	0.730296	0.819429	0.838077	0.838176	0.813164	0.8249	0.82004	0.862285	0.00143432	0.0399181	0.070783	37	1	200883619	CGCCCAGGCTGGAATGCTGTAGCAAGATTTCGGCTCACTGCAACCCCCGT	F	C1orf106;C1orf106	NM_001142569;NM_018265	3'UTR;3'UTR	chr1:200880593-200881270	S_Shelf							200883619	200883742	NC_000001.10
cg05522848	0.786401	0.734049	0.732341	0.744801	0.78715	0.800096	0.84876	0.848268	0.872071	0.818558	0.805721	0.815969	0.00148746	0.0403347	0.0707515	37	5	68710359	CATCTTGATATTTGGCATAATGTTCAAACACACTTTATACACACTGACCG	F	RAD17;MARVELD2;RAD17;RAD17;RAD17;RAD17;RAD17;MARVELD2;RAD17;RAD17	NM_133339;NM_001038603;NM_133344;NM_002873;NM_133342;NM_133340;NM_133341;NM_144724;NM_133338;NM_133343	3'UTR;TSS1500;3'UTR;3'UTR;3'UTR;3'UTR;3'UTR;TSS1500;3'UTR;3'UTR	chr5:68710807-68711520	N_Shore							68710359	68710482	NC_000005.9
cg01828328	0.702546	0.713687	0.706542	0.6938	0.718835	0.711287	0.767331	0.771816	0.803729	0.727595	0.798491	0.802184	0.00143616	0.03994	0.0707415	37	8	134310946	CCTCTAGGACCCAGGACATCTGTGTTTCAGGCCTGTCTTTGACACTATCG	R	NDRG1;NDRG1	NM_001135242;NM_006096	TSS1500;TSS1500	chr8:134308328-134310145	S_Shore							134310946	134311069	NC_000008.10
cg11986861	0.820526	0.79592	0.836861	0.778483	0.805414	0.870686	0.881062	0.883669	0.900516	0.882316	0.866497	0.917996	0.00179818	0.0434393	0.0706939	37	22	29284199	AGGAATTAGTTTCCTAAAATTACTCTCTGTGATACCTTTACTTAACATCG	F	ZNRF3	NM_032173	5'UTR	chr22:29279412-29280287	S_Shelf							29284199	29284322	NC_000022.10
cg03347722	0.248789	0.238064	0.220157	0.252166	0.19369	0.189489	0.33019	0.284266	0.30367	0.253972	0.310213	0.283862	0.00104384	0.0354275	0.0706362	37	19	13134771	CGCCCCCAACTCACAACTCTTTTGAGTCCAGAATCTCAGAATCGGGCGTT	F	NFIX	NM_002501	Body	chr19:13135317-13136169	N_Shore		TRUE		19:13133847-13134813	Unclassified_Cell_type_specific	TRUE	13134771	13134894	NC_000019.9
cg18309449	0.689241	0.622549	0.675071	0.656753	0.652753	0.651675	0.729132	0.693683	0.779734	0.69225	0.736936	0.739894	0.00192111	0.0445007	0.070598	37	3	102399370	ACCATCCGGCTCCTCTTTGAGTTCATTTTTGTGTGCCTCCTGTGCACACG	R							TRUE					102399370	102399493	NC_000003.11
cg13535489	0.744744	0.735457	0.761234	0.764474	0.800546	0.763725	0.789463	0.818351	0.824574	0.841272	0.849861	0.869883	0.00078527	0.0320265	0.0705373	37	19	54761827	TCTGCTCCAAATACCAAGAAATGCTCCTTATGTTTGAAGTTCCCGGCACG	R	LILRB5;LILRB5;LILRB5	NM_001081443;NM_006840;NM_001081442	TSS1500;TSS1500;TSS1500									54761827	54761950	NC_000019.9
cg06204755	0.350853	0.321427	0.358907	0.330463	0.395411	0.38106	0.459044	0.427876	0.465925	0.388759	0.422354	0.397252	0.00226653	0.0475367	0.0705146	37	17	70484432	CGCAGAGCAAGTCCACAGAACCCTGCTGTCACCACCTCGGAGCCAAACTT	F							TRUE					70484432	70484555	NC_000017.10
cg12668122	0.585971	0.531924	0.572478	0.589959	0.576436	0.564092	0.627133	0.648515	0.643108	0.623023	0.688909	0.613154	0.000596864	0.0288754	0.070497	37	3	133094221	CGTGTCTGAATATGGACAATTGTTGTGGGGTGGAATCTACATATTGATGG	R	TMEM108;TMEM108	NM_001136469;NM_023943	Body;Body				TRUE					133094221	133094344	NC_000003.11
cg10415021	0.284029	0.276883	0.300562	0.279573	0.282389	0.288847	0.352529	0.316714	0.365859	0.349544	0.385798	0.364558	0.000326921	0.0234115	0.0704532	37	11	110890228	CGGCTGGCTTTCTGCTGTGAGTGATCCACAGGCCAAATACAGACAGCATA	F							TRUE					110890228	110890351	NC_000011.9
cg07791065	0.751918	0.733851	0.691078	0.701371	0.695954	0.746778	0.770004	0.794597	0.836287	0.771064	0.75528	0.816059	0.0019491	0.0447298	0.0703903	37	6	113786051	ATCAAGAGATTCTCGGAGGCTCCTGGGAGCACTGCATGTCTGGATCAACG	R							TRUE					113786051	113786174	NC_000006.11
cg00966380	0.818729	0.828978	0.844807	0.8189	0.80612	0.800598	0.916629	0.912215	0.856121	0.897263	0.902461	0.855664	0.000599341	0.0289097	0.0703699	37	12	47633443	CGGCCGCTTTGTACAACTCCAGATTTAACCGTAAATGTTGCCTCCTGGCA	R				chr12:47629034-47629680	S_Shelf							47633443	47633566	NC_000012.11
cg15368544	0.639463	0.623499	0.613194	0.641924	0.658204	0.638698	0.710631	0.688215	0.708755	0.660816	0.705731	0.762952	0.00226462	0.0475214	0.0703531	37	17	39110451	AATGTATTCAAGGTTTGCTTGCCCTGAGACTAACCCAAGTCTGTGTCACG	R							TRUE					39110451	39110574	NC_000017.10
cg18740839	0.261449	0.189083	0.183803	0.224671	0.170467	0.206745	0.2997	0.27675	0.284106	0.228558	0.298074	0.271108	0.002419	0.0487269	0.0703463	37	19	35417443	CGTGTGAGAAAAATATATTTCTGTCCTCTGATACAGGAATTTTAAGTTTC	R	ZNF30;ZNF30;ZNF30;ZNF30	NM_001099437;NM_194325;NM_001099438;NR_024018	TSS1500;TSS1500;TSS1500;TSS1500	chr19:35417701-35418217	N_Shore				19:35417142-35418631	Unclassified		35417443	35417566	NC_000019.9
cg02310454	0.690786	0.634114	0.682214	0.67041	0.689868	0.70981	0.742744	0.768876	0.794405	0.733621	0.75545	0.704047	0.0017342	0.0428579	0.0703233	37	6	39683778	CGCTGGTTCACTTCTTTTATCAGATGGGTGATGACTGGGTGAATCAATTA	F	KIF6	NM_145027	Body									39683778	39683901	NC_000006.11
cg27169860	0.234561	0.247317	0.215952	0.201458	0.216115	0.197504	0.339022	0.274538	0.285066	0.241194	0.278106	0.316793	0.00247836	0.0491849	0.0703024	37	2	66218712	TTTAATGGCACAGATTCCTAAAGAGGCGGTGCGCAGCATGAATTTTTACG	F							TRUE					66218712	66218835	NC_000002.11
cg00363318	0.103123	0.142153	0.131485	0.13924	0.138361	0.159866	0.195553	0.176194	0.220898	0.233734	0.202004	0.20741	9.13e-05	0.0151052	0.0702608	37	X	74743636	CATCTGCCTGGAAAACCTGAATTTATTAATATAGCTCAGCTTAAATATCG	F	ZDHHC15;ZDHHC15;ZDHHC15	NM_001146257;NM_144969;NM_001146256	TSS1500;TSS1500;TSS1500	chrX:74742765-74743117	S_Shore							74743636	74743759	NC_000023.10
cg10375381	0.787918	0.747134	0.757144	0.716809	0.749754	0.781504	0.845718	0.840326	0.821077	0.827289	0.79936	0.827911	0.000399101	0.0251088	0.0702368	37	1	67597928	CGCCCAGCGAGTAAACCTCTTAAAACCTGGTGTAGTGGCTCTTGCCTGTA	R				chr1:67600390-67600715	N_Shelf							67597928	67598051	NC_000001.10
cg10135877	0.164948	0.128121	0.169829	0.144107	0.134557	0.171025	0.2598	0.226966	0.243379	0.18398	0.17968	0.23973	0.0019941	0.0451675	0.0701582	37	7	56246843	CGTGCTGTATGACTCCATTCATATTATGTTCATAACAAGGAAATCTATTG	F				chr7:56242406-56243298	S_Shelf							56246843	56246966	NC_000007.13
cg17509561	0.651761	0.638947	0.635019	0.674085	0.677381	0.678991	0.710396	0.702103	0.768506	0.741342	0.757985	0.696669	0.00124991	0.0378523	0.0701361	37	8	19419126	AAAGGCGGCCTTGGCCTGTCCTGCAGCAGGTGTGATGATTAAGATCCACG	R	CSGALNACT1;CSGALNACT1;CSGALNACT1	NM_001130518;NR_024040;NM_018371	5'UTR;Body;5'UTR				TRUE					19419126	19419249	NC_000008.10
cg00273737	0.667316	0.630818	0.659746	0.656453	0.682107	0.683698	0.710243	0.713819	0.74947	0.716311	0.727361	0.783693	0.000791823	0.0321319	0.0701265	37	9	90794482	AGCCCATACTGAACCACTGCTCCTGGAGAAATACAGGGTTAGCTTCCACG	R				chr9:90795354-90795580	N_Shore							90794482	90794605	NC_000009.11
cg07720174	0.790793	0.821947	0.733806	0.796346	0.787005	0.792523	0.854646	0.84779	0.851775	0.882708	0.855321	0.850583	0.00103397	0.0353415	0.070067	37	2	202508813	GTCTCCTTGTTAGCTGACTCACAATGAAAACTTTTCTCAAAAAATCAGCG	F	ALS2CR4;ALS2CR4	NM_001044385;NM_152388	TSS1500;TSS1500	chr2:202507139-202508270	S_Shore				2:202508646-202508838	Promoter_Associated		202508813	202508936	NC_000002.11
cg02483101	0.351201	0.366361	0.366006	0.39009	0.330108	0.3616	0.373249	0.467025	0.447021	0.451804	0.429502	0.416919	0.00208687	0.0459435	0.0700257	37	8	130365373	CGAGGGCATGTGCATCCATGTGTGTCAGGCTGGTAGCAGCTGCAATAATG	F												130365373	130365496	NC_000008.10
cg02708704	0.744466	0.728189	0.779198	0.743453	0.741237	0.815558	0.823279	0.864261	0.849175	0.800375	0.801162	0.833897	0.00229477	0.0477895	0.070008	37	19	37265455	AGCATGCTCCTGTCCAATCTTTCCCGCTCATTTGTAGTCTTCTCAGATCG	R				chr19:37266594-37267027	N_Shore				19:37265404-37265640	Unclassified_Cell_type_specific		37265455	37265578	NC_000019.9
cg00762069	0.726978	0.705818	0.72723	0.671098	0.701347	0.668482	0.772715	0.741138	0.77917	0.757964	0.773056	0.796841	0.000432062	0.0258564	0.0699884	37	3	129986285	GTGTGCCTTCATAATACGCCCTGAAATAACTTTCATCCAGCTCCAGTTCG	F	COL6A4P2	NR_027898	Body	chr3:129982745-129983090	S_Shelf							129986285	129986408	NC_000003.11
cg17206604	0.254579	0.270779	0.242496	0.246356	0.223271	0.251922	0.310358	0.294931	0.344708	0.318932	0.333892	0.306469	3.75e-05	0.011637	0.0699812	37	3	150088779	ATCTGACAGACTCTGAATTATAACCATCATATCTCTTCATCAACTCTACG	F							TRUE					150088779	150088902	NC_000003.11
cg18286201	0.767817	0.736264	0.793706	0.770674	0.764173	0.80512	0.872929	0.820047	0.807241	0.815072	0.882183	0.859563	0.00210408	0.0460489	0.0698802	37	13	70681278	CGCGTGTGCTCATGTGGCTACTAAGTCTAAAATGTTTCAGGTTGAAAATG	R	KLHL1;ATXN8OS	NM_020866;NR_002717	Body;TSS200	chr13:70681732-70682219	N_Shore		TRUE					70681278	70681401	NC_000013.10
cg14206140	0.668363	0.675449	0.694913	0.685048	0.664799	0.676383	0.750075	0.74141	0.742922	0.742219	0.741085	0.766432	4.74e-07	0.00328496	0.0698646	37	9	136303481	CGCTCTGCCAGCTGTGAAAGAGCCCTTCCGTGGGCTGCACGTGCTGTTGT	R	ADAMTS13;ADAMTS13;ADAMTS13;ADAMTS13	NR_024514;NM_139027;NM_139025;NM_139026	Body;Body;Body;Body						9:136302676-136303577	Unclassified_Cell_type_specific		136303481	136303604	NC_000009.11
cg14773826	0.693802	0.699667	0.725595	0.68198	0.714863	0.689014	0.785858	0.786192	0.794482	0.725106	0.78741	0.745003	0.000817657	0.0324853	0.069855	37	5	52855566	TTTTCTCTTTCTTTCTCCCTTTCCCTTATGTACTGGGTTTTCCTTTAACG	R	NDUFS4	NM_002495	TSS1500	chr5:52856665-52856870	N_Shore							52855566	52855689	NC_000005.9
cg04623270	0.22809	0.233541	0.256771	0.246384	0.287198	0.282826	0.289734	0.285654	0.336239	0.327656	0.367497	0.347093	0.00210157	0.0460294	0.0698436	37	16	58150017	CTCTCTACAGCACCACATATATCACATGCCCTGCAGACCCCAAGAAGACG	F	C16orf80	NM_013242	Body				TRUE					58150017	58150140	NC_000016.9
cg00717825	0.79283	0.776896	0.785848	0.75384	0.808694	0.818312	0.852262	0.868009	0.847059	0.856773	0.868879	0.862282	0.000331766	0.0235145	0.0698076	37	14	25318675	CGTGGAAGTCACGGTCTCCATTTAATAGATGAGGACTAAGTAGCAGGTCT	F	STXBP6	NM_014178	Body				TRUE					25318675	25318798	NC_000014.8
cg24384918	0.268619	0.297197	0.331392	0.3054	0.315762	0.293752	0.308147	0.371026	0.387987	0.403022	0.378219	0.382393	0.00208164	0.0458911	0.0697784	37	7	43153950	CGCAGATCTGGCCACCTGCTTTGAGACGCCTTGGACCACAACACTGCCGG	R	HECW1	NM_015052	5'UTR	chr7:43152020-43153340	S_Shore	CDMR						43153950	43154073	NC_000007.13
cg16240480	0.795377	0.75942	0.819492	0.784814	0.780324	0.792214	0.861947	0.857922	0.861186	0.81474	0.867614	0.886879	0.000281388	0.0222012	0.0697743	37	1	236557473	GGTTGGGCTGCTAACAAGCTCACTCAACTAGTGTTTCCTGACGGCCAACG	R	EDARADD;EDARADD	NM_145861;NM_080738	TSS1500;TSS1500	chr1:236558459-236559336	N_Shore							236557473	236557596	NC_000001.10
cg15236453	0.221703	0.202836	0.275183	0.185361	0.204169	0.204652	0.269596	0.294802	0.318964	0.286042	0.255445	0.287691	0.00157572	0.0412047	0.0697725	37	6	17043034	CCATTCTGTTATACACTTTCCATGGCATGGTTCATTTCCAGGGTGAAGCG	R							TRUE				TRUE	17043034	17043157	NC_000006.11
cg24703468	0.452555	0.440186	0.493259	0.462731	0.483194	0.471194	0.505206	0.512115	0.512637	0.567254	0.553004	0.571399	0.00121412	0.0374277	0.0697492	37	21	43135126	CGCCACACTTTGAGATGAATTAGGAGTCCTCTATTAGCTGGCAACCAAGA	R	C21orf129;NCRNA00112	NR_027272;NR_024028	Body;TSS1500				TRUE					43135126	43135249	NC_000021.8
cg11324504	0.495376	0.487138	0.478953	0.505179	0.547784	0.508328	0.579083	0.556284	0.584113	0.547097	0.605878	0.568474	0.000356226	0.024031	0.0696953	37	22	38474147	CGACAGAAGGTTCTATTCCTCCGCCCAGGCTCCGGCTGCCACCTGAGTTG	R	SLC16A8	NM_013356	3'UTR	chr22:38476836-38478839	N_Shelf				22:38474083-38474172	Unclassified_Cell_type_specific		38474147	38474270	NC_000022.10
cg24119613	0.598676	0.599561	0.577235	0.616932	0.631613	0.603224	0.689118	0.657861	0.674173	0.650897	0.726565	0.646607	0.00117819	0.0370221	0.069663	37	13	32330150	TTCAGCTTGAGTCATTTAGTCCTGATGACCCTGGAGATCCCGCAAGCACG	F	RXFP2;RXFP2	NM_130806;NM_001166058	Body;Body				TRUE					32330150	32330273	NC_000013.10
cg26192689	0.710908	0.707193	0.740228	0.722601	0.734711	0.72588	0.754197	0.783762	0.794929	0.798001	0.818352	0.810197	0.000183388	0.0189304	0.0696528	37	2	206730773	CGCCTGGGTGCACCTGATGATTTCCAAGTCTGTGCTGTCCTCTGGCTTCT	R						CDMR						206730773	206730896	NC_000002.11
cg06112871	0.633893	0.613731	0.637194	0.646498	0.694506	0.658815	0.710887	0.679312	0.745816	0.694812	0.722115	0.749521	0.00140991	0.0397	0.0696378	37	7	39383753	ATGCTGCATTTAACCTTGGCCTCCCACGTACCATCTTGCATGGCAGGACG	R	POU6F2;POU6F2	NM_007252;NM_001166018	Body;Body				TRUE					39383753	39383876	NC_000007.13
cg17148988	0.752824	0.775847	0.808565	0.830599	0.80684	0.809487	0.859916	0.856674	0.8731	0.854871	0.881739	0.875553	0.000959412	0.034385	0.0696151	37	8	56989372	CGAGGAAATTTCTTTATAGAGAAAAGCAAAATGTGGCCCAGCAGGTATGT	F				chr8:56986556-56987308	S_Shelf							56989372	56989495	NC_000008.10
cg19869035	0.745069	0.798195	0.777394	0.815859	0.777528	0.784129	0.852931	0.84411	0.852284	0.86729	0.89021	0.808899	0.000807426	0.0323368	0.0695917	37	7	2653955	CGCTGCTTCCAAAACCAAAGGAGGAATTTTGCAATCGTTTAGACGGGTTA	R	IQCE;IQCE	NM_152558;NM_001100390	3'UTR;3'UTR			RDMR	TRUE	7:2620481-2620683			TRUE	2653955	2654078	NC_000007.13
cg04932465	0.756976	0.70938	0.71676	0.681004	0.698932	0.759823	0.775593	0.798927	0.798996	0.767568	0.800314	0.799001	0.0017833	0.0433156	0.0695873	37	12	121718556	CGCTCCCAGGCTTATTAGGAAGGGGAAATTCCCACCTGATAAATTTTGGT	F	CAMKK2;CAMKK2;CAMKK2;CAMKK2;CAMKK2;CAMKK2;CAMKK2	NM_172215;NM_172216;NM_006549;NM_172214;NM_153499;NM_153500;NM_172226	5'UTR;5'UTR;5'UTR;5'UTR;5'UTR;5'UTR;5'UTR					12:120202823-120202940				121718556	121718679	NC_000012.11
cg20229493	0.111436	0.0631844	0.0955502	0.051515	0.0642186	0.0875722	0.166244	0.171561	0.168319	0.0910928	0.130127	0.163627	0.00185516	0.0439533	0.0695825	37	6	50685098	CTCCCACTCTCTGGCGCACGGTTACAATGTTTATTTTCTTAGAAGAAACG	F	TFAP2D	NM_172238	Body	chr6:50682334-50683214	S_Shore	DMR	TRUE					50685098	50685221	NC_000006.11
cg03003919	0.50212	0.519049	0.530335	0.524462	0.536467	0.52942	0.546433	0.613212	0.609133	0.591147	0.601282	0.598072	0.000334878	0.0235713	0.0695709	37	8	85087913	CGGGGGGAAAGCGTAGGCAGGACTTGTAAAAGACCACACAGCTGCAATTG	F							TRUE					85087913	85088036	NC_000008.10
cg17727597	0.207057	0.199568	0.228123	0.199619	0.209402	0.209224	0.251465	0.239093	0.272203	0.287613	0.309437	0.310583	0.00144771	0.0400282	0.0695668	37	5	118159086	CGTGCTACACAGGTAATTAGGCTTGATGGACAGAAATGGTGAAGTGTTTG	F							TRUE					118159086	118159209	NC_000005.9
cg21557108	0.720118	0.733639	0.728633	0.708167	0.726566	0.747072	0.801671	0.790568	0.773421	0.809936	0.811963	0.793992	5.3e-06	0.00637814	0.0695593	37	15	50410962	CGGGGTTTGTATACAGTGCACCTATTCAATATATTGTTTATGGTCAATTT	R	ATP8B4	NM_024837	5'UTR				TRUE					50410962	50411085	NC_000015.9
cg05492974	0.671049	0.712509	0.653962	0.701875	0.668011	0.722907	0.758656	0.775023	0.73846	0.751743	0.775729	0.748038	0.000740076	0.0312869	0.0695562	37	15	63464737	CCAGGCCTCTCCTCCAACACTGGGGATTACAATTCACACATGAGATTTCG	R							TRUE					63464737	63464860	NC_000015.9
cg06861560	0.680535	0.639827	0.662809	0.651408	0.613254	0.699728	0.713863	0.719973	0.750301	0.731481	0.715707	0.733494	0.00143573	0.0399357	0.069543	37	3	126419473	AAGTCTCAGCCAATCAGAAGACATACTACTCACAGGTGGCCAACTGTTCG	F				chr3:126422888-126423609	N_Shelf							126419473	126419596	NC_000003.11
cg23461158	0.484753	0.42179	0.489493	0.462798	0.490824	0.475841	0.494287	0.515273	0.535955	0.550453	0.582956	0.563803	0.00238123	0.0484442	0.069538	37	4	15187142	CGCTCCCTTTACAGTTGGCTAGAATGGAGATGAACCCCAGGGTGAACCTG	F							TRUE					15187142	15187265	NC_000004.11
cg10331462	0.869177	0.852196	0.875579	0.840563	0.833965	0.886812	0.931172	0.934007	0.949636	0.897734	0.942214	0.920371	0.000117537	0.0165437	0.0694733	37	1	23687823	CGGTTGGAAAGGAAAAATGAGACACAGGTTTGGGGACCAAGGACCCATCA	R	ZNF436;ZNF436	NM_001077195;NM_030634	3'UTR;3'UTR									23687823	23687946	NC_000001.10
cg05521474	0.623202	0.579274	0.630187	0.632956	0.650278	0.672545	0.714245	0.703136	0.646018	0.714287	0.698277	0.72909	0.00252149	0.0495076	0.0694353	37	5	135082196	GTCGCCTTTGCTGCCTTTGTGGTCACCGGAACTGCTGTCGTGCATTTCCG	R								5:135110073-135110161				135082196	135082319	NC_000005.9
cg16143325	0.688847	0.71362	0.710355	0.738926	0.737076	0.692384	0.780063	0.754769	0.806419	0.764035	0.790331	0.802142	0.000190252	0.0192301	0.0694252	37	3	141495473	AGCACATACACACTTGGCCTCATGCTACCAGGAATTATGTAATGAACTCG	F				chr3:141497158-141497492	N_Shore			3:142978083-142978164				141495473	141495596	NC_000003.11
cg01593787	0.806712	0.726625	0.736974	0.713177	0.749189	0.740739	0.788443	0.812749	0.82115	0.818142	0.837558	0.811643	0.00197485	0.0449506	0.0693781	37	13	111182949	CGCCCCACCTCTACAGACACAGGACCCTGGGGAAGTAGGTCCCACCCGCC	F	RAB20	NM_017817	Body				TRUE					111182949	111183072	NC_000013.10
cg00776427	0.573402	0.621511	0.597141	0.624252	0.585452	0.578372	0.680058	0.611699	0.661577	0.674876	0.695801	0.672378	0.00103274	0.03533	0.0693767	37	4	85258738	AACTTCCTCTACCTCATTAAAAAGGTTAACATGCAAATTCAGGAAATTCG	F							TRUE					85258738	85258861	NC_000004.11
cg19970883	0.636832	0.634017	0.635207	0.649393	0.669148	0.674242	0.69886	0.712824	0.743834	0.700344	0.74586	0.713098	0.000113374	0.0163394	0.06933	37	15	35082573	ATGCTTCTAAGATGCCTTCTCTCTCCATCTACCTTCCAGTCAGGATGACG	F	ACTC1	NM_005159	3'UTR									35082573	35082696	NC_000015.9
cg19179259	0.720229	0.646072	0.666643	0.698301	0.634416	0.683626	0.765462	0.746961	0.762517	0.759675	0.728081	0.70245	0.00219147	0.0469028	0.06931	37	10	97799757	CGAGGAAGAGAGAATTCCTGCTGCCCAACTTATTTGAGCTGGGACATAGG	R				chr10:97802871-97804262	N_Shelf							97799757	97799880	NC_000010.10
cg18393958	0.150625	0.198383	0.159951	0.197701	0.203806	0.176639	0.275006	0.198538	0.252926	0.234033	0.285779	0.256135	0.00163294	0.0417917	0.069219	37	11	82443149	CGCTGAAAAATAGAAGGGACAGGTGGCTACAGAAGCCAGCTCTTACCCCT	F	FAM181B;FAM181B	NM_175885;NM_175885	1stExon;3'UTR	chr11:82443435-82444976	N_Shore	RDMR						82443149	82443272	NC_000011.9
cg25568241	0.099084	0.0644308	0.0975275	0.0655746	0.0784561	0.10115	0.172189	0.161039	0.169616	0.117191	0.120376	0.181045	0.000719249	0.0309619	0.0692054	37	3	190104266	TTCCACATTGTATGCACTACCCACCCCTTAGTCACTTAATAGCTGCCTCG	F							TRUE				TRUE	190104266	190104389	NC_000003.11
ch.13.564317R	0.099238	0.0678426	0.085649	0.0563544	0.0579156	0.0773966	0.124132	0.152816	0.182419	0.104887	0.114809	0.180309	0.00244995	0.0489877	0.0691626	36	13	44582648	CAGGCTCTGACATTCTGCCACCAACACACAGGAAGCAAACAGGTTTTTTT	F												44582648	44582771	NC_000013.10
cg26020878	0.201049	0.214897	0.220273	0.180245	0.187691	0.171452	0.222898	0.271157	0.28825	0.235738	0.270414	0.302062	0.00130783	0.038512	0.069152	37	1	172352681	ACCATTTCCTTAAAATCTCTTTGTTTCTAGAATTGGAGGGTCACAGTACG	F	DNM3;DNM3	NM_015569;NM_001136127	Body;Body				TRUE					172352681	172352804	NC_000001.10
cg12105920	0.644151	0.663724	0.636811	0.636009	0.646358	0.676374	0.72741	0.697783	0.76274	0.732345	0.717315	0.68074	0.000893936	0.0335011	0.069151	37	10	47257805	CGATGGTAGGTTTATTTCTTGAACTTTCAGAAGTTCAAGCTTAAAGCATC	F				chr10:47254936-47256041	S_Shore							47257805	47257928	NC_000010.10
cg22596932	0.603234	0.543691	0.5639	0.558881	0.566142	0.559391	0.626558	0.636755	0.616439	0.643278	0.675905	0.611125	0.000279848	0.0221605	0.0691371	37	17	69199546	CGCTGGGTTCACGATGACAGAAAAGAATTTCTGTTCATGAAGGGTGACCT	F												69199546	69199669	NC_000017.10
cg07538890	0.392385	0.375865	0.417523	0.377037	0.373939	0.395474	0.44677	0.472876	0.487306	0.428725	0.452232	0.458513	9.44e-05	0.0152717	0.0690333	37	3	171913083	AGCAATTGATATCAAATGACTAAAATAATTTCACACAGTGTTCTCCCTCG	F	FNDC3B;FNDC3B	NM_001135095;NM_022763	Body;Body				TRUE					171913083	171913206	NC_000003.11
cg25631033	0.672922	0.66277	0.619263	0.669605	0.669336	0.68453	0.70824	0.702844	0.73505	0.7468	0.711574	0.788086	0.00203941	0.0455488	0.0690281	37	5	2094363	CGACGCCCCGTGCCAGGACGCTCTCCCATGTGAAAGCTGGCTGAAGTCCT	R								5:2147221-2147580				2094363	2094486	NC_000005.9
cg14429381	0.810748	0.739517	0.776002	0.764874	0.773558	0.816596	0.828317	0.83457	0.869876	0.83019	0.886021	0.846446	0.00123452	0.0376883	0.069021	37	9	103342099	CGAGGGATGTGGCCCATAACTCCCCGTGGCATTCTTTACACATTAGGCAA	F	MURC	NM_001018116	Body									103342099	103342222	NC_000009.11
cg19442920	0.740862	0.762868	0.776569	0.739186	0.769479	0.804581	0.833453	0.83594	0.815039	0.819368	0.849001	0.854831	0.000305894	0.0228762	0.0690144	37	19	6371790	GGTAATGAGACCCCACGTACTTATCACACCAATTCAACAATTAATTCACG	R	ALKBH7	NM_032306	TSS1500	chr19:6372722-6373218	N_Shore							6371790	6371913	NC_000019.9
cg21910634	0.661202	0.646001	0.691221	0.638377	0.6469	0.653255	0.716344	0.694188	0.715728	0.706786	0.752237	0.765285	0.000727555	0.0310662	0.0689353	37	6	98366864	CTATGATAAACTAACCCCATTATTTCACAAAAATTAAATTAGGACATTCG	F							TRUE					98366864	98366987	NC_000006.11
cg17365076	0.57094	0.569114	0.577591	0.53989	0.568163	0.552085	0.588912	0.612403	0.660651	0.645281	0.6612	0.622758	0.00106151	0.0356682	0.0689037	37	11	116274125	CGGGGTTTAGAAGCTAAATCTATTGGGCATATCCAAAGATAAAAGGGCCA	F							TRUE					116274125	116274248	NC_000011.9
cg04125205	0.76999	0.763746	0.771292	0.71621	0.802945	0.787328	0.870033	0.806915	0.803081	0.831945	0.855956	0.856992	0.00196364	0.0448502	0.068902	37	4	649540	CGCAGCCTGGCCCCTCTGACCCCTGCACACACACGTGCAGCCCAGACCAG	F	PDE6B;PDE6B;PDE6B	NM_000283;NM_001145291;NM_001145292	Body;Body;Body	chr4:650278-651114	N_Shore							649540	649663	NC_000004.11
cg07982899	0.830562	0.815205	0.836996	0.815928	0.841023	0.831977	0.899643	0.901595	0.900363	0.855637	0.875724	0.951992	0.00246079	0.0490598	0.0688772	37	4	81307586	CGGGTCAGGCAAGGGGGTCACCACCTTGCGCCCACCACTGCCGCCACGGC	F	C4orf22	NM_152770	Body	chr4:81307471-81307952	Island			4:81526339-81527131				81307586	81307709	NC_000004.11
cg08429705	0.421314	0.434354	0.445954	0.460814	0.436577	0.449679	0.47293	0.531931	0.516822	0.490264	0.533843	0.516119	0.000301913	0.0227798	0.0688698	37	19	2583601	CGCTCAGCAGGCCCATAAATAGGATTGTGCAGAGGTGCATATGCAAGCAC	F	GNG7	NM_052847	5'UTR	chr19:2578956-2579746	S_Shelf							2583601	2583724	NC_000019.9
cg00545229	0.790067	0.755816	0.762379	0.739083	0.744564	0.804383	0.834634	0.797225	0.845583	0.803911	0.857354	0.870651	0.00157232	0.0411808	0.0688444	37	4	15429531	CGAGTGAGGCTCAACTCGGGGACCAGTTAAAATTACAGTTTTGTTTGGGA	R	C1QTNF7;C1QTNF7;C1QTNF7	NM_031911;NM_001135170;NM_001135171	TSS200;Body;5'UTR				TRUE					15429531	15429654	NC_000004.11
cg16886329	0.723508	0.712016	0.685161	0.696917	0.746191	0.76207	0.769295	0.7837	0.811821	0.779929	0.782496	0.811659	0.00105141	0.0355514	0.0688395	37	20	6100495	TTTTCCATTCACCCACTTCTCCAAGACCACTTGGCTATGTATTTCCTTCG	R	FERMT1	NM_017671	5'UTR	chr20:6103436-6103970	N_Shelf							6100495	6100618	NC_000020.10
cg16328319	0.788557	0.778096	0.823411	0.785499	0.789767	0.796294	0.879953	0.837199	0.855015	0.821265	0.88069	0.900365	0.00125272	0.0378831	0.0688106	37	8	82373787	CGAGTGGCTCTTCTCAGCAAGTGTTCCATGATGGTTGAGCCCTTCTTGGG	R	FABP9	NM_001080526	TSS200									82373787	82373910	NC_000008.10
cg07075268	0.282926	0.212361	0.22075	0.236429	0.222766	0.264103	0.307562	0.257426	0.335009	0.303874	0.302022	0.346239	0.0023876	0.0484885	0.0687997	37	8	53857047	CGTTGCAATGTGTAATTTGGAAATATTAGACTAGAAAACAATGATGTCTT	F				chr8:53851701-53854426	S_Shelf							53857047	53857170	NC_000008.10
cg08977816	0.737361	0.765821	0.789659	0.774719	0.751429	0.784433	0.819407	0.844961	0.838176	0.819587	0.884014	0.809933	0.000657699	0.029847	0.068776	37	2	11863086	AAGGTGCTGTTGCATAATAAAAAGTCAACAAAGCATGTGCAAATCCCACG	R												11863086	11863209	NC_000002.11
cg07954489	0.566732	0.574963	0.539493	0.545678	0.584251	0.556157	0.600521	0.644267	0.640901	0.629108	0.635592	0.629414	2.97e-05	0.0109268	0.0687547	37	7	98283300	CGGTCAAAATCAGCCTTGGAGCTCTCACTCAGTGTGTGGGAACAAAAATC	F												98283300	98283423	NC_000007.13
cg02524236	0.65422	0.643649	0.636973	0.688358	0.671303	0.692428	0.769171	0.718448	0.699483	0.716534	0.749431	0.74617	0.000706919	0.0307132	0.0687178	37	10	128086694	AGCCATTCCTGCAGCCTGAGCCTTTTAGGCACTTTTCCAGCAGCAGAGCG	R							TRUE				TRUE	128086694	128086817	NC_000010.10
cg05468953	0.675042	0.624303	0.67308	0.645103	0.675645	0.666771	0.714503	0.731131	0.769158	0.686415	0.725216	0.745779	0.000890113	0.0334596	0.0687095	37	4	100565104	TTCCACCATCCACAAGGACTTTAATGTTTCATATAATTAACCCTTTAACG	R							TRUE					100565104	100565227	NC_000004.11
cg11826726	0.254968	0.269916	0.293176	0.272345	0.270049	0.311249	0.318541	0.315182	0.326086	0.351105	0.391528	0.381426	0.0022504	0.0474115	0.0686942	37	8	43131431	GTGGACACTGCGCTCAGAAGCGTCACTGGCTCCTGGGAGGCCAAGGACCG	R				chr8:43131177-43131487	Island			8:43250370-43250704				43131431	43131554	NC_000008.10
cg01181485	0.787789	0.759581	0.776983	0.740338	0.748828	0.768261	0.850197	0.83293	0.848275	0.800265	0.819945	0.842298	7.73e-05	0.0142905	0.0686885	37	4	153454027	AGCATCTCAAAGGCAGGGACCCCAAAAACTTTGTCATTTCTACCCAAACG	R	FBXW7	NM_033632	5'UTR	chr4:153456108-153457843	N_Shelf							153454027	153454150	NC_000004.11
cg18098498	0.546749	0.558542	0.529284	0.565852	0.573952	0.582105	0.669209	0.601172	0.613651	0.616509	0.640459	0.627483	0.000330821	0.0234791	0.0686662	37	4	173589088	CGGGGGAAAATGCTGAGTGGTTCATCACAGGCAAAACAGGGAGTTCCTAA	R	GALNTL6	NM_001034845	Body				TRUE					173589088	173589211	NC_000004.11
cg09185990	0.276224	0.296385	0.29755	0.27737	0.277561	0.303124	0.332632	0.315046	0.351573	0.386451	0.397672	0.356642	0.00195093	0.044742	0.0686337	37	12	22090231	CGTTGACTTGTCATTTGAGTTAGGTTTAATTCATCTTGAGCATTTGATTT	R	ABCC9;ABCC9;ABCC9	NM_020297;NM_020298;NM_005691	TSS1500;TSS1500;TSS1500	chr12:22093954-22095357	N_Shelf							22090231	22090354	NC_000012.11
cg01706566	0.78895	0.758803	0.716807	0.744734	0.759382	0.764696	0.837186	0.79755	0.840732	0.825584	0.828716	0.815338	0.000271253	0.0219633	0.068622	37	8	26239922	CGTGGGAAGCCGTTTATCCTGTACGTGGATGACATTAAACTATGTTCCTG	R	BNIP3L	NM_004331	TSS1500	chr8:26240290-26241017	N_Shore							26239922	26240045	NC_000008.10
cg09548718	0.58704	0.57397	0.570351	0.621525	0.633658	0.611238	0.658086	0.627866	0.677573	0.678843	0.714196	0.652639	0.00167987	0.0423022	0.06857	37	16	17398605	CCAAAGTTGCTGGACCAGTTAAACCACTACCAGTTACTTCTTTGCCCACG	R	XYLT1	NM_022166	Body				TRUE		16:17398604-17398735	Unclassified_Cell_type_specific		17398605	17398728	NC_000016.9
cg18066182	0.669368	0.635596	0.659247	0.639307	0.650618	0.687642	0.733566	0.703097	0.777282	0.724646	0.730857	0.683314	0.00183537	0.0437834	0.0684975	37	11	14748453	CGGAGGAAATGTAATCAAGGAAGGACTTAAGTATTCCCCCAGAGTTTTCT	F	PDE3B	NM_000922	Body				TRUE					14748453	14748576	NC_000011.9
cg23752752	0.515149	0.521049	0.517232	0.549924	0.531555	0.545407	0.597654	0.574338	0.590306	0.603196	0.604685	0.620986	1.51e-05	0.00866484	0.0684748	37	7	4778908	TTTGCCCGTCCTGAATGCCTTCGGGAACTCTGAAAAGCGCATTATCACCG	R	FOXK1	NM_001037165	Body				TRUE	7:4745365-4745435			TRUE	4778908	4779031	NC_000007.13
cg12555816	0.682787	0.617346	0.63459	0.59809	0.632234	0.654432	0.711885	0.731326	0.695886	0.675865	0.693122	0.722143	0.0011844	0.0371105	0.0684579	37	11	124253092	GATCTACATTGTCACCATGGTAGGCAACCTTGGCTTGATCACTCTTTTCG	F	OR8B2	NM_001005468	1stExon									124253092	124253215	NC_000011.9
cg12096363	0.5616	0.529766	0.560642	0.535876	0.553097	0.568781	0.601166	0.592121	0.64097	0.658038	0.635349	0.592846	0.000902389	0.0336362	0.0684547	37	12	45471054	CGGAGATGAACAATGCCCAGGGTAAGGCAAAATAATGCACAAAAAGCCAA	R							TRUE					45471054	45471177	NC_000012.11
ch.7.1427355R	0.100628	0.0683156	0.110269	0.0560247	0.057265	0.0832077	0.147878	0.141652	0.187212	0.0976126	0.139813	0.172046	0.00170048	0.0424856	0.0684172	36	7	66652571	CAGCATCAAAGGAAGAATCTCATTAACTTGCTGGACAAATGACAGGTAAG	F	TYW1	NM_018264	Body									66652571	66652694	NC_000007.13
cg10481617	0.816762	0.841588	0.791104	0.751297	0.776803	0.78108	0.87891	0.853375	0.836197	0.842753	0.879271	0.878543	0.00187312	0.0440981	0.0684023	37	6	12789309	GATGATATAACCACCATTTCTTTGTTCTTCTTTTGTATGTCAGTTTTGCG	R	PHACTR1	NM_030948	Body				TRUE					12789309	12789432	NC_000006.11
cg06549863	0.751588	0.756137	0.768409	0.74509	0.758992	0.783613	0.802265	0.797945	0.830736	0.850901	0.823476	0.868602	0.000802993	0.0322923	0.0683492	37	4	166323062	CGGGAGGCTGGGCAAAAGGCTGATAGAGTAATACTGGCATAATTTGATGA	F	CPE;MIR1979	NM_001873;NR_031743	Body;TSS1500									166323062	166323185	NC_000004.11
cg11344121	0.812817	0.735571	0.794086	0.792829	0.804181	0.794919	0.830473	0.858932	0.847315	0.868289	0.878208	0.861145	0.000710337	0.0307939	0.0683264	37	7	140776653	AATGGAAATGGTGTTCCCCATCGCCCAAAATACAGCAATCACTGTCAGCG	R				chr7:140772358-140774560	S_Shelf							140776653	140776776	NC_000007.13
cg15462332	0.820231	0.75841	0.798482	0.787249	0.817088	0.74904	0.86163	0.821918	0.866405	0.838964	0.848027	0.903476	0.00212914	0.0462909	0.0683199	37	Y	24052532	CGGGATGAAAGTTATTCTAGAGGATACAGGTACTGTAACTTTTTCTGGAT	R	RBMY1D;RBMY1E;RBMY1B	NM_001006120;NM_001006118;NM_001006121	Body;Body;Body									24052532	24052655	NC_000024.9
ch.5.92182126F	0.0801987	0.0736342	0.10463	0.0496549	0.0635801	0.0766347	0.14694	0.144677	0.203667	0.102879	0.129333	0.130751	0.00257382	0.0498572	0.0683191	36	5	92156370	CAAGCAGTACTACTAGGTGGAGCTGACACAATGTGTATTGAATGCCTATT	F												92156370	92156493	NC_000005.9
cg06696292	0.812697	0.774012	0.757757	0.823545	0.801903	0.801186	0.861837	0.871132	0.868233	0.845009	0.881937	0.852795	0.000391913	0.0249972	0.068307	37	8	23536779	CGTGGCATTGAACATTGCAATGTGGAGCCCAAACCACAGAAAATGGGGTG	F	NKX3-1	NM_006167	3'UTR	chr8:23539807-23540602	N_Shelf							23536779	23536902	NC_000008.10
cg14258595	0.837066	0.801684	0.812902	0.802649	0.819356	0.88211	0.877717	0.908024	0.92794	0.875233	0.872355	0.904273	0.00157597	0.0412047	0.0682957	37	12	44173883	CGAGGAAAGAAAGTGTTTCCCAAGAGGGAGTAGTCAAAAAGAGTCAAGGG	F	IRAK4;IRAK4;IRAK4;IRAK4;IRAK4	NM_001145256;NM_001145258;NM_001114182;NM_001145257;NM_016123	Body;Body;Body;Body;Body									44173883	44174006	NC_000012.11
cg22540040	0.526667	0.559611	0.554697	0.56122	0.545371	0.564534	0.608399	0.631699	0.647706	0.601706	0.617254	0.615081	2.08e-05	0.00953798	0.0682908	37	12	68978235	CGGAGACTATGAGATTTGTGGCTTTACAATGAATGGCCTGAGGTCACATG	R							TRUE					68978235	68978358	NC_000012.11
cg22800453	0.453358	0.435998	0.420613	0.440913	0.43392	0.43027	0.500192	0.459728	0.497673	0.517302	0.506032	0.543711	0.000972484	0.034554	0.0682608	37	12	55252109	CGTAGGCAAGGTAAGTAGTTGGATGAAATCACAGGAAGCATGAATAGTTG	R	MUCL1	NM_058173	3'UTR									55252109	55252232	NC_000012.11
cg01584389	0.818987	0.796977	0.83387	0.801461	0.805761	0.789744	0.860701	0.862118	0.894339	0.868812	0.872098	0.898285	2.59e-05	0.0102518	0.0682589	37	6	32366417	CGGACAGGGAATAAAATCCTCATATGGATAAAGGAGATGAGGAAACAGTC	R	BTNL2	NM_019602	Body									32366417	32366540	NC_000006.11
cg25494605	0.621679	0.672773	0.635732	0.663932	0.663389	0.656367	0.710524	0.677588	0.740299	0.715109	0.71043	0.769458	0.00166618	0.0421861	0.068256	37	5	173472097	CGGTAACCAGAGCTGGAATTTGAACCCTGATCGGTGGCCACCAAAATTTG	R	HMP19	NM_015980	TSS1500									173472097	173472220	NC_000005.9
cg05426006	0.735041	0.678075	0.731794	0.666156	0.671472	0.701093	0.7748	0.773184	0.745367	0.750014	0.744591	0.804877	0.00169498	0.0424314	0.0682002	37	13	45781603	CAAAACACCAACCTTTTTAATCGCATGTAGTTTTCACTGGCAGCTGGTCG	F	GTF2F2	NM_004128	Body				TRUE					45781603	45781726	NC_000013.10
cg24983539	0.372505	0.433888	0.39756	0.390883	0.402117	0.360346	0.48121	0.442189	0.444946	0.472549	0.474443	0.450744	0.000463994	0.0265909	0.0681304	37	11	99975877	CAGCAGAATAACCCTGGGCAAGTTCATGAAGCTTTTGCTTCAAGTAATCG	F	CNTN5;CNTN5	NM_014361;NM_175566	Body;Body				TRUE					99975877	99976000	NC_000011.9
cg18402201	0.8273	0.798174	0.847044	0.828257	0.848402	0.867348	0.900372	0.876317	0.931296	0.883181	0.913225	0.920807	0.000414579	0.025521	0.0681123	37	5	54601554	CAGGGCTAGTACTAAACCACTCTTCTTTCCCCAAACTAACTTTTTCTTCG	F	DHX29	NM_019030	Body	chr5:54603209-54603904	N_Shore	RDMR						54601554	54601677	NC_000005.9
cg06027691	0.240535	0.280375	0.238416	0.204809	0.227122	0.245653	0.325596	0.304536	0.307953	0.274294	0.334352	0.298724	0.000486041	0.0270036	0.0680907	37	3	37998565	GTGCTCAAGAGGGCTTTGAAGTTTCTTTTGAGAATATGATCTTCTCTTCG	R	CTDSPL;CTDSPL	NM_005808;NM_001008392	Body;Body				TRUE		3:37998539-37998849	Unclassified_Cell_type_specific		37998565	37998688	NC_000003.11
cg18079534	0.182939	0.167091	0.169067	0.162552	0.150321	0.190895	0.229519	0.219155	0.241571	0.235213	0.232725	0.27295	4.3e-05	0.0119307	0.0680443	37	5	158893397	CTCCCTGTCTTCTCCTTGCTAGAAGAACCTCAGTTTTGTTCAGAGGATCG	F	LOC285627	NR_027110	TSS200									158893397	158893520	NC_000005.9
cg07608333	0.706062	0.699788	0.698154	0.678062	0.658057	0.645077	0.776781	0.729238	0.764013	0.740265	0.747162	0.736004	0.000404526	0.0252431	0.0680439	37	19	7813422	CGGGGTTTCTGTATGCTGGAAATGTTCTATATTTTGATCATAGAGATGTG	F	CD209;CD209;CD209;CD209;CD209;CD209;CD209;CD209	NR_026692;NM_001144899;NM_001144894;NM_001144895;NM_001144896;NM_001144893;NM_001144897;NM_021155	TSS1500;TSS1500;TSS1500;TSS1500;TSS1500;TSS1500;TSS1500;TSS1500				TRUE					7813422	7813545	NC_000019.9
cg13327911	0.0920066	0.0543531	0.0684318	0.0553378	0.0764983	0.082049	0.133175	0.12279	0.163438	0.0976697	0.146612	0.173252	0.000831208	0.0326949	0.0680433	37	6	55965977	CGACTGAAGGCTCAGCAACAGACCATGATGTTTGTGTTAACCATGCATTT	F	COL21A1	NM_030820	Body				TRUE					55965977	55966100	NC_000006.11
cg13067350	0.132987	0.100281	0.160683	0.0906668	0.0982102	0.127138	0.174584	0.185645	0.22715	0.143113	0.190631	0.19705	0.00148008	0.0402686	0.0680347	37	1	221274025	CGTTTGCCATAAGCCACCATGACTCAGAGTTCACAGATGGGAAGAAACAG	F							TRUE					221274025	221274148	NC_000001.10
cg24936299	0.7589	0.813556	0.806653	0.821958	0.822921	0.848856	0.882452	0.867762	0.880369	0.873046	0.860707	0.916709	0.00128745	0.0382779	0.0680334	37	2	159672354	CGGCTGTGTTTTAAATCCAGGCTTAACATTTTCGAGGCTGCTGAATAATG	R	DAPL1	NM_001017920	3'UTR									159672354	159672477	NC_000002.11
cg14316231	0.743581	0.745066	0.7456	0.718819	0.696151	0.754294	0.799966	0.794215	0.815502	0.765561	0.79012	0.846078	0.000841317	0.0328289	0.0679884	37	8	41895100	TTAGCAGCTCTTCAGGTCAACTACAGTTCACAATTCCCTGGAGGAAAACG	R	MYST3;MYST3;MYST3	NM_001099413;NM_001099412;NM_006766	Body;Body;Body				TRUE					41895100	41895223	NC_000008.10
cg15084803	0.722645	0.738114	0.742785	0.769287	0.806134	0.75374	0.841409	0.812252	0.836779	0.842041	0.828649	0.77926	0.0015157	0.0406309	0.0679477	37	3	14160960	CGACTTTTAAAAGTTCCAGAAAGCAAAGGCCCTCTAGGACAGGCATACAA	R	CHCHD4;CHCHD4	NM_001098502;NM_144636	Body;Body						3:14160954-14161089	Gene_Associated_Cell_type_specific		14160960	14161083	NC_000003.11
cg24559147	0.198452	0.19656	0.193681	0.214482	0.238061	0.169718	0.222435	0.29194	0.301827	0.25911	0.270451	0.272817	0.00105288	0.0355748	0.0679376	37	1	36020018	CGCAGATGTCTGCCAATAATATCCTGATAAAATCCAGGAAGCAGGATTTG	F	KIAA0319L	NM_024874	Body	chr1:36022680-36023834	N_Shelf							36020018	36020141	NC_000001.10
cg22628064	0.748573	0.741133	0.735998	0.735617	0.748726	0.77524	0.818455	0.839211	0.767544	0.80662	0.798211	0.862553	0.00258223	0.0499219	0.0678845	37	1	201489517	CGTTTGTAGGTATCTCTGTTGGCTTCCCCTCTTGTGAGTCTTGCAGGTCG	F	RPS10P7	NR_026667	Body									201489517	201489640	NC_000001.10
cg14495916	0.713329	0.67077	0.709532	0.717114	0.738229	0.760638	0.768553	0.791795	0.777351	0.7718	0.799819	0.806345	0.00147488	0.0402381	0.0676753	37	3	171800301	CTGCTGAACGGCTGGAGAATGAACTAGATGTCCTCTCAGGATGACTCCCG	F	FNDC3B;FNDC3B	NM_022763;NM_001135095	5'UTR;5'UTR				TRUE					171800301	171800424	NC_000003.11
cg23888238	0.657734	0.67476	0.674089	0.710445	0.682318	0.725829	0.754912	0.764894	0.729462	0.733214	0.80425	0.744433	0.00129905	0.0384159	0.067665	37	4	109192755	TCTTCACAGCCTGCGCATTTGGTATTAACAATGTGACCACACCAGCCTCG	F							TRUE					109192755	109192878	NC_000004.11
cg24431693	0.143179	0.144496	0.156619	0.109844	0.130725	0.100015	0.162461	0.202429	0.227444	0.181289	0.212878	0.204254	0.000407303	0.0253138	0.0676459	37	6	101597928	CGGCCTATTGTAAAGGACACCACAGTGGAAGCCAGAAAACCTTTGTTCTA	R							TRUE					101597928	101598051	NC_000006.11
cg10093067	0.594538	0.622769	0.644706	0.665491	0.639742	0.624456	0.694101	0.689048	0.674144	0.696419	0.704529	0.739179	0.000478839	0.0269081	0.0676196	37	11	3733666	CGTGATTGCCAATGTTTGTACTCTTCAAAGTTCCAAGGGTCATAAAACAG	F	NUP98;NUP98;NUP98;NUP98	NM_016320;NM_139131;NM_005387;NM_139132	Body;3'UTR;3'UTR;Body									3733666	3733789	NC_000011.9
rs2521373	0.664545	0.676932	0.65805	0.710979	0.698292	0.651807	0.768161	0.741906	0.752878	0.755628	0.704766	0.742741	0.000419706	0.0256183	0.067579																				rs2521373
cg18792365	0.100577	0.0942004	0.0874886	0.0751058	0.0894809	0.0747505	0.141653	0.161773	0.146873	0.148167	0.148188	0.180179	5.45e-06	0.00639524	0.0675384	37	8	13132967	CGGCATAGGAACACAGACTTAGAGAGCAAACAAGAAGGCACCATAAACGC	F	DLC1	NM_182643	Body	chr8:13133842-13134312	N_Shore	RDMR	TRUE					13132967	13133090	NC_000008.10
cg02109073	0.833133	0.850713	0.856357	0.854368	0.813521	0.856665	0.91462	0.918077	0.937391	0.86168	0.922866	0.915226	0.00053895	0.027869	0.0675173	37	8	8176460	CGGGACCTGTGCCTGGAGAACCTGCTGCTGGTGCACTGCACCCTCCAGGC	R	PRAGMIN	NM_001080826	Body	chr8:8175699-8176775	Island			8:8213134-8214148				8176460	8176583	NC_000008.10
cg26289295	0.775017	0.797128	0.798509	0.769364	0.777877	0.829204	0.874412	0.832004	0.911564	0.855903	0.833975	0.844335	0.00162319	0.041696	0.0675157	37	8	120228093	CGCATTGTGAATGAATCCATACTTGTGTGGGCTGCTTTGTAAATACATCT	F	MAL2	NM_052886	Body				TRUE					120228093	120228216	NC_000008.10
cg07830156	0.101472	0.0448288	0.0835253	0.0634909	0.0553864	0.0795223	0.128071	0.156289	0.152997	0.0772692	0.165687	0.152989	0.00237364	0.0483766	0.0675128	37	1	101174567	AAACTTAACCTCTAGTCCTAGTTTTCTTATTACCTAGCTGTGTGGCTTCG	R							TRUE					101174567	101174690	NC_000001.10
cg01188578	0.258209	0.254046	0.277167	0.261479	0.256117	0.242222	0.328925	0.311419	0.339805	0.347738	0.308338	0.31754	1.39e-05	0.00843343	0.0674205	37	2	26464058	CGCTGACTGTAGTCTTATGAGGTTTTGTAGTTATTCTTGGGTTACATTAC	R	HADHA	NM_000182	Body	chr2:26467102-26467946	N_Shelf							26464058	26464181	NC_000002.11
cg13199429	0.151729	0.15148	0.136905	0.1657	0.153296	0.139212	0.202933	0.239028	0.216021	0.177874	0.203255	0.263598	0.00191828	0.0444787	0.0673978	37	14	63670711	CGCTTAAAGTTTCTCATTTAAGTAAAGAACTGCTCGTTTTTAGTTTGCAG	F	RHOJ	NM_020663	TSS1500								TRUE	63670711	63670834	NC_000014.8
cg21289365	0.72603	0.768904	0.73665	0.744471	0.743631	0.754561	0.799144	0.834584	0.83431	0.822986	0.792854	0.794646	7.87e-05	0.0143748	0.0673797	37	19	12207214	CGGTGGGGACCCACGCGGGTTCAACATGCATATCGAGAAGTGTTATTTCT	F	ZNF788	NR_027049	Body	chr19:12203028-12203503	S_Shelf							12207214	12207337	NC_000019.9
cg03584506	0.13798	0.135142	0.149701	0.173444	0.112071	0.125052	0.203713	0.205069	0.257039	0.202531	0.206929	0.162342	0.00153173	0.0408014	0.0673719	37	11	39689828	CTTCAGGAGCTTTAAACCATCATGTTAGGTGGGCCCTATCAAGCAAAACG	F						DMR						39689828	39689951	NC_000011.9
cg20745888	0.799764	0.757274	0.805213	0.805457	0.767498	0.773105	0.841181	0.862781	0.829457	0.822946	0.909237	0.846931	0.00190567	0.0443439	0.0673704	37	12	29549608	CCTTAGGCCCTCTGGATAATGTAGAACTGTCTACCAGCCCTAAATTTCCG	R							TRUE					29549608	29549731	NC_000012.11
cg10715333	0.697269	0.728833	0.72363	0.680819	0.713276	0.695644	0.753948	0.810748	0.771443	0.805317	0.753091	0.748728	0.000854264	0.0330149	0.0673009	37	6	31018523	CGGAAGTTAGAGCTAGGAAACGTATGTATGTAAACTAACTCATGCATAAA	R												31018523	31018646	NC_000006.11
cg05531409	0.239358	0.262497	0.25951	0.266635	0.257553	0.282469	0.298302	0.347844	0.29808	0.317449	0.366405	0.343743	0.00106795	0.0357141	0.0673002	37	3	131637172	AGTTCAGTTTGAGTCCCTTAATGCTGGAAGTCCCAGAATGTGATATCACG	R	CPNE4	NM_130808	5'UTR				TRUE					131637172	131637295	NC_000003.11
cg18913171	0.749557	0.676858	0.705569	0.710045	0.705714	0.692203	0.746238	0.764814	0.78358	0.740876	0.813951	0.794278	0.00140478	0.0396149	0.0672986	37	1	159925416	CGTGACTTCATGGAGCTCATAATGCTAACAATTGACATTGGACAAGTAAC	F	SLAMF9;SLAMF9;SLAMF9	NM_001146173;NM_001146172;NM_033438	TSS1500;TSS1500;TSS1500									159925416	159925539	NC_000001.10
cg15309879	0.471353	0.532906	0.523763	0.47838	0.470376	0.472024	0.542869	0.554349	0.515691	0.564171	0.587873	0.587222	0.00207228	0.0458104	0.0672287	37	8	933232	CGAGGACCTGTACCTTCCACCAACACGTGGATTCTAAGGGCATATTTAAA	R								8:923207-923424				933232	933355	NC_000008.10
ch.3.82825901F	0.0891311	0.0602719	0.0802331	0.0518998	0.0453771	0.0511245	0.110412	0.144135	0.164145	0.0985685	0.105402	0.158618	0.00112542	0.0364343	0.0672072	36	3	82743211	CAGCAAACATTCCTGGCAGATGCAGATAGGATATGGGGCTAATGAAGCTG	F												82743211	82743334	NC_000003.11
cg16702660	0.471247	0.436881	0.479276	0.448654	0.46298	0.51978	0.528176	0.565502	0.507551	0.52568	0.544613	0.550126	0.00120747	0.037369	0.0671385	37	14	22361282	CACAAGGTCAGAACAAAATCCCTCCTTTCTGTGTACTCTGTTCACTCACG	F												22361282	22361405	NC_000014.8
cg20960611	0.374161	0.371514	0.37531	0.34337	0.387694	0.373973	0.460694	0.403784	0.459192	0.435632	0.429409	0.440087	0.000129008	0.0169039	0.0671294	37	3	21445979	TTCCCAAAGCAGTCTACAGATTTAATTCAATTCCTATGAAAATACCAACG	R	VENTXP7	NR_002311	TSS1500									21445979	21446102	NC_000003.11
cg26482745	0.683656	0.682832	0.710323	0.691177	0.663893	0.674123	0.73591	0.732627	0.788738	0.747769	0.749743	0.753923	9.44e-05	0.0152717	0.0671175	37	20	137860	CGATCTTGGTCCGGCTGCGCAGAGAGTCAAAGCAGGAAAATCACAGATTC	F	DEFB127	NM_139074	TSS1500									137860	137983	NC_000020.10
cg25560924	0.530578	0.521804	0.496869	0.489356	0.528044	0.538083	0.606501	0.575498	0.604675	0.587422	0.585457	0.547813	0.000226596	0.0204136	0.0671053	37	4	72246676	CGGCATTCTGAAGTGTAATTTTCTGCAATGGTTCTGTTTTCTGAGACCCA	F	SLC4A4;SLC4A4;SLC4A4	NM_001134742;NM_001098484;NM_003759	Body;Body;Body				TRUE					72246676	72246799	NC_000004.11
cg26929280	0.62054	0.557564	0.586979	0.587181	0.615668	0.607704	0.649677	0.664059	0.644	0.652099	0.669149	0.699246	0.000366914	0.024283	0.067099	37	11	92402250	CGAAGGTGTCTTGGAAAACCAGGGATGCTTCACAGGACCCCCTGTAATCT	R	FAT3	NM_001008781	Body				TRUE					92402250	92402373	NC_000011.9
cg27121959	0.684976	0.681408	0.699894	0.715499	0.735181	0.729103	0.745916	0.772644	0.81924	0.759924	0.780347	0.770307	0.000644782	0.029683	0.0670528	37	11	100905070	AGTTGACCTCATTCCAAGGCAGAGCTCAGGTCACAGGCACAGGGGCTGCG	F	PGR	NM_000926	3'UTR									100905070	100905193	NC_000011.9
cg13831216	0.608502	0.582106	0.553946	0.585523	0.614615	0.587163	0.652488	0.628045	0.666635	0.663452	0.679635	0.643708	0.000190487	0.0192408	0.0670181	37	7	69778639	GAACCGGCGGGTCCGTGGCTGATGGATGCTACAAGTACTAACCAGCAACG	F	AUTS2;AUTS2	NM_015570;NM_001127231	Body;Body				TRUE					69778639	69778762	NC_000007.13
cg18219180	0.781167	0.813014	0.796338	0.748885	0.750358	0.820393	0.841196	0.886691	0.819301	0.864269	0.852203	0.848515	0.00185279	0.043944	0.0670034	37	2	204800350	CGCGCTTCCAAGATGCTAGATCCAGGCTGGACTTCCCTTAGCCTGCAGAA	R	ICOS	NM_012092	TSS1500									204800350	204800473	NC_000002.11
cg03490157	0.342397	0.38078	0.382422	0.387798	0.41073	0.422012	0.450861	0.414835	0.461608	0.448096	0.470381	0.482273	0.00116287	0.0368457	0.0669861	37	3	6906061	CGCAAAAAGGGCTACTGGAAGAGATTGTTGGTATATGAAACACATATTCC	R	GRM7;GRM7	NM_181874;NM_000844	Body;Body	chr3:6904133-6904641	S_Shore	RDMR						6906061	6906184	NC_000003.11
cg25286579	0.685751	0.64354	0.651862	0.605457	0.655444	0.604351	0.692001	0.722206	0.719032	0.702582	0.709734	0.702707	0.00236751	0.0483242	0.0669761	37	1	56069436	GAGTTGGCTGACAAATCAACACTTAAAGCCCTCAGCACCTTGGTGGTACG	R							TRUE					56069436	56069559	NC_000001.10
cg17914143	0.11826	0.118647	0.135139	0.126448	0.138904	0.0998588	0.163251	0.211455	0.18877	0.212235	0.185196	0.178145	6.41e-05	0.0134239	0.0669659	37	X	54466747	CGCAGACCTGGCAGCAAGACTAGAGCAAAAGAAAAATCTGTCAGAGCGAT	R	TSR2	NM_058163	TSS200					X:54483422-54483966	X:54466419-54467027	Promoter_Associated		54466747	54466870	NC_000023.10
cg23786205	0.622904	0.616543	0.625213	0.645572	0.657319	0.670228	0.73331	0.687444	0.670316	0.722711	0.737698	0.687929	0.00112486	0.0364307	0.066938	37	10	77057425	CGAGTTACAGAAGCTGTGAAGCTCAGCTGTGCAGCTGCTCTTGGGTCTCT	R				chr10:77054582-77054929	S_Shelf							77057425	77057548	NC_000010.10
cg11079711	0.187241	0.1779	0.208469	0.171991	0.183253	0.188121	0.282895	0.23536	0.262641	0.231409	0.258639	0.247523	6.5e-05	0.0134928	0.0669154	37	17	38929662	CGGGTCTCTATCACCTATAATGATACAAATTGATTGGTTAACTAATTATG	F	KRT26	NM_181539	TSS1500									38929662	38929785	NC_000017.10
cg12819537	0.412668	0.414036	0.424459	0.428826	0.44054	0.43752	0.479215	0.504967	0.507959	0.490228	0.461402	0.515747	0.000119222	0.0166133	0.0669115	37	14	22370643	CGGATGATGCTTGTGCAGCCATAGAGGAAAAGATTTCACATAAGGAGAGT	R												22370643	22370766	NC_000014.8
cg16631326	0.462397	0.426601	0.480549	0.462184	0.466047	0.493421	0.518148	0.503187	0.527374	0.524534	0.583263	0.535551	0.00104794	0.0354947	0.0668098	37	4	13977635	CGGAAAAACTGAGGCTCAGGGAATTGAATGGACTTGCCCAGATTGTTAAG	F												13977635	13977758	NC_000004.11
cg25342577	0.769144	0.756039	0.818473	0.807114	0.784488	0.802154	0.844908	0.880975	0.866998	0.807759	0.869311	0.868049	0.00104375	0.0354275	0.0667641	37	3	87135140	TGTGGAGCCGCTGGTGCATCTCCTTCTCCTAGGGTTCTAACACTGGGGCG	F				chr3:87138225-87138546	N_Shelf							87135140	87135263	NC_000003.11
cg26803305	0.748287	0.743653	0.738871	0.745962	0.752223	0.756092	0.825312	0.819006	0.837509	0.790883	0.778951	0.833975	0.000731726	0.0311538	0.0667577	37	18	43304452	ACCAAAGCCACAGGCTTCTTCCTGGAAGCTCAAAGGCATGCCTTTATTCG	R	SLC14A1;SLC14A1;SLC14A1	NM_015865;NM_001146036;NM_001128588	5'UTR;5'UTR;5'UTR				TRUE					43304452	43304575	NC_000018.9
cg20224311	0.116705	0.0675709	0.103236	0.0738866	0.0600859	0.0722519	0.150878	0.146872	0.149977	0.0977787	0.150399	0.197786	0.00227245	0.0475931	0.066659	37	12	69978764	CAGTTCACAAGACCTTATCCTGGGCAGTCAACGTCCAGTTAGAAATAACG	R	CCT2	NM_006431	TSS1500	chr12:69979065-69979724	N_Shore				12:69978694-69980149	Promoter_Associated		69978764	69978887	NC_000012.11
cg02492279	0.636646	0.610628	0.642351	0.671351	0.677276	0.682418	0.720166	0.721315	0.708402	0.723101	0.70314	0.744446	0.00108229	0.0359047	0.06665	37	10	70805603	CGTTGCACCACAGATTGGAAGTGGAAATTCAAATCAACTCAGGGCCCAGA	R							TRUE		10:70804877-70805759	Unclassified		70805603	70805726	NC_000010.10
cg14293614	0.170854	0.163216	0.177411	0.16751	0.193324	0.17683	0.231461	0.218757	0.24206	0.262576	0.237665	0.256513	1.85e-05	0.00915762	0.0666477	37	9	37593003	CGCAGCGCTCCAGGCTCAAGATAGATGTTATTGTTGTTGTTATTATTATT	R	TOMM5;TOMM5;TOMM5	NM_001134485;NM_001134484;NM_001001790	TSS1500;TSS1500;TSS1500	chr9:37592198-37592734	S_Shore							37593003	37593126	NC_000009.11
cg19305938	0.790982	0.764266	0.766302	0.766969	0.746645	0.795701	0.810783	0.796879	0.845048	0.83422	0.857503	0.886212	0.00233869	0.0480866	0.06663	37	8	28363767	CGGGAACAGATTAGTGGAAGAAGCACTAGAATAGGGATAGGAGACTTGTA	F	FZD3	NM_017412	Body				TRUE					28363767	28363890	NC_000008.10
cg26244531	0.789578	0.752775	0.74917	0.74919	0.776896	0.758341	0.831345	0.804856	0.870218	0.813092	0.834992	0.821221	0.000262784	0.0216347	0.0666288	37	11	1603012	CGGTCCCGAGATATAGACCCCCCACGGTCCCGACATATGGACCCCCATGG	R	HCCA2;LOC338651	NM_053005;NR_021489	Body;Body					11:1558914-1559757				1603012	1603135	NC_000011.9
ch.15.1458091R	0.121751	0.0736423	0.0824213	0.0722951	0.0653673	0.0829137	0.171704	0.136373	0.191034	0.105198	0.128897	0.164009	0.00213253	0.046321	0.0664708	36	15	86411837	CAGCCAACTGATTTTTGACAAAGAAATCAAGAACACTCACTGGGGAAAGG	F												86411837	86411960	NC_000015.9
cg26668744	0.740621	0.716052	0.71966	0.72204	0.762611	0.765424	0.826688	0.778529	0.821868	0.766263	0.788406	0.843348	0.00192173	0.0445076	0.0664491	37	7	159127977	AATGCTGCTTCGCCTCCGTGGTACCCCAAAAGGCTGTGCAGAGGAGAACG	F								7:158820696-158821035				159127977	159128100	NC_000007.13
cg20617818	0.577303	0.618085	0.601671	0.601697	0.636247	0.649682	0.668701	0.639268	0.724257	0.708581	0.672464	0.66984	0.00253187	0.049595	0.0664044	37	6	68935490	CGGCAAGTGGATGGTGGTAGCATAAACTGAAATAAGAAAGACTTGAAGTT	F							TRUE					68935490	68935613	NC_000006.11
cg17591985	0.869847	0.787848	0.803636	0.80704	0.798438	0.81485	0.9038	0.865015	0.900863	0.840152	0.8933	0.876868	0.00170185	0.0424875	0.0663899	37	5	89828771	CGTGTCTGCATGGATGAAGACTTGAAGATGGTTGTTTTCAAGTCATGTTT	R				chr5:89825116-89825804	S_Shelf							89828771	89828894	NC_000005.9
cg05936004	0.846012	0.827798	0.866192	0.80788	0.821061	0.829381	0.891529	0.895354	0.900768	0.880402	0.90171	0.926654	0.000114726	0.0164137	0.066349	37	3	130693828	AGAAATAACAGCTCACAATGGTTCAAGTTCTCTATTAGCTACTATATACG	F	ATP2C1;ATP2C1;ATP2C1;ATP2C1	NM_001001485;NM_001001486;NM_014382;NM_001001487	Body;Body;Body;Body				TRUE					130693828	130693951	NC_000003.11
cg26394624	0.687069	0.701035	0.745578	0.744599	0.757867	0.759375	0.776881	0.825486	0.780318	0.780425	0.812618	0.817683	0.0019836	0.0450437	0.0663145	37	5	102780588	ATCATTGACAAACAACAGGACTTGTGTTTCATTTTACCTGGAACACAACG	F							TRUE					102780588	102780711	NC_000005.9
cg21004982	0.726874	0.711112	0.745858	0.725774	0.704585	0.73147	0.811254	0.760433	0.764548	0.80524	0.820047	0.782027	0.000514901	0.027448	0.0663125	37	1	171106319	ACTCAAAAGACAGAATTGTGGTCTCTGAACCTTGTCTCTGGCTCCCTCCG	F	FMO6P	NR_002601	TSS1500				TRUE					171106319	171106442	NC_000001.10
cg05957730	0.773903	0.78828	0.727423	0.720642	0.712432	0.722679	0.811002	0.798124	0.783846	0.845842	0.817237	0.786953	0.00248751	0.049264	0.0662743	37	2	71361235	CGTGAGTATTTTGAACCATCCTTTACATTGTAAGCTGGAATTGCCCAATC	F	MPHOSPH10	NM_005791	Body	chr2:71357187-71357952	S_Shelf							71361235	71361358	NC_000002.11
cg10315333	0.75536	0.765886	0.824885	0.812725	0.824847	0.826727	0.855132	0.880994	0.847207	0.867587	0.868329	0.888753	0.00257547	0.0498729	0.0662622	37	4	74111455	TTAAACCCTTACTGATACATCATCCAAGACTATTATTTCAGATCCTCTCG	R	ANKRD17;ANKRD17	NM_198889;NM_032217	Body;Body				TRUE					74111455	74111578	NC_000004.11
ch.8.1439749R	0.0971961	0.0659436	0.0968768	0.0513124	0.0576149	0.0667452	0.142233	0.11929	0.180984	0.103049	0.140944	0.146702	0.000776449	0.0318918	0.0662519	36	8	67587037	CAGCACTGAGTTTGCCATGGGCTACTGTGTGACATGTGATGACTCAACTC	F	C8orf44	NM_019607	TSS1500									67587037	67587160	NC_000008.10
cg17002713	0.820295	0.75835	0.791105	0.750528	0.794766	0.809552	0.855385	0.850232	0.889082	0.81816	0.84903	0.859952	0.00121657	0.0374666	0.0662075	37	8	124826377	CGGTTAGTTTTCTACTTTGTCTTATAGAAGGTAGAAACCATGTGTATGTT	F	FAM91A1	NM_144963	3'UTR									124826377	124826500	NC_000008.10
cg23657718	0.587767	0.594046	0.645459	0.627035	0.662857	0.643103	0.652643	0.718631	0.692614	0.682029	0.689869	0.721544	0.00220001	0.0469631	0.0661772	37	4	1495933	TTGGTATCTAGAACTCCACACATCAAATTACACAGCAGCACGACGACGCG	F				chr4:1494542-1494753	S_Shore			4:1465075-1465339				1495933	1496056	NC_000004.11
cg02803828	0.644497	0.666875	0.665558	0.656107	0.640454	0.682926	0.732468	0.68563	0.736059	0.700207	0.728061	0.771034	0.00158461	0.0412853	0.0661736	37	2	125180279	CGTGGAGCTGCATATGCTCAGGAATCGTAGGTTGCTAACTTTGATTTTGT	R	CNTNAP5	NM_130773	Body			CDMR						125180279	125180402	NC_000002.11
cg01566692	0.808455	0.742516	0.760195	0.747796	0.746678	0.760252	0.821092	0.811785	0.859879	0.813381	0.827661	0.828888	0.00042424	0.0256938	0.0661323	37	16	18933346	CGGGGTTTTAGGACATTAATTGTGTAATTGGTCTTACTTGTTTAGTAGTA	R	SMG1	NM_015092	Body	chr16:18937030-18938126	N_Shelf							18933346	18933469	NC_000016.9
cg04776718	0.756474	0.764362	0.749292	0.703652	0.791094	0.740981	0.826128	0.779564	0.809963	0.825437	0.835169	0.826087	0.00131032	0.0385165	0.0660821	37	11	3601042	CGGAGAGATAAGGATGTCACCATGAGCAAGCCTCCCAGACAGCATCAAGG	F				chr11:3601851-3602616	N_Shore			11:3557548-3557759				3601042	3601165	NC_000011.9
cg13856812	0.321767	0.293459	0.271597	0.275477	0.273838	0.284138	0.370596	0.320048	0.383368	0.363703	0.354544	0.32449	0.000598966	0.0289097	0.066079	37	17	9551644	CGTTCAACAAATATTTATTGAATGTCCAGAGAGTAGACTAGGAATGCATG	F	USP43	NM_153210	Body	chr17:9548389-9549616	S_Shelf						TRUE	9551644	9551767	NC_000017.10
cg03726791	0.738489	0.708937	0.676921	0.692665	0.664505	0.741573	0.754752	0.758478	0.759978	0.80344	0.789792	0.7527	0.0023694	0.0483394	0.0660084	37	2	242529748	CGGGCAGCTCTGAGTGTCCTAGTGCCCCTCATCATCAGCCGGGCAGCTCT	R	THAP4;THAP4	NM_015963;NM_001164356	Body;Body					2:242178111-242179128			TRUE	242529748	242529871	NC_000002.11
ch.7.735851R	0.109505	0.069371	0.114487	0.0603378	0.0762599	0.0754828	0.16272	0.137187	0.179413	0.10822	0.129732	0.184167	0.00182342	0.0436785	0.0659994	36	7	30007811	CAGCACTGAAGTGGATAACAGCCTTATGCATCTGTCATAGTGTCTGGTCT	F	SCRN1;SCRN1;SCRN1;SCRN1	NM_014766;NM_001145513;NM_001145514;NM_001145515	Body;Body;Body;5'UTR									30007811	30007934	NC_000007.13
cg07040723	0.139365	0.0716279	0.0875566	0.0730213	0.086958	0.0887135	0.139667	0.19606	0.166373	0.110076	0.161089	0.169432	0.0019146	0.0444422	0.0659092	37	14	106941205	TTGAAATTAAGCTGCCTGTATATCATTCCCCACTGTCAAATTCCATTTCG	R	LOC100133469	NR_027457	Body	chr14:106938196-106938818	S_Shelf							106941205	106941328	NC_000014.8
cg21477262	0.738424	0.747839	0.746231	0.794517	0.757658	0.767257	0.823409	0.809485	0.833578	0.823536	0.848421	0.808056	0.00011298	0.016313	0.0657599	37	12	22777430	TCTACCATTCCCTGTAAGGCACTGAGACGCAAGATTTCAAGGCCCACTCG	R	ETNK1;ETNK1	NM_018638;NM_001039481	TSS1500;TSS1500	chr12:22777988-22778301	N_Shore			12:22668676-22668733				22777430	22777553	NC_000012.11
cg13544125	0.719433	0.729325	0.74728	0.721139	0.725785	0.728588	0.794738	0.789115	0.779279	0.766386	0.823233	0.813178	0.000213085	0.0200911	0.0657297	37	11	14661502	CAGAGTACACTGAGGATTATTACCTCTGTATCACAGCTCCTGTTACAACG	R	PSMA1	NM_148976	5'UTR	chr11:14665053-14666674	N_Shelf							14661502	14661625	NC_000011.9
cg18438823	0.600443	0.607808	0.61863	0.571534	0.618296	0.621272	0.634556	0.670158	0.698513	0.66587	0.699707	0.663536	0.000478018	0.0268966	0.065726	37	11	4676365	CGGTGTCAAGCATAAGCACTATTATGTTCTAGGCACTTTGCTGGGGGATT	R	OR51E1	NM_152430	3'UTR									4676365	4676488	NC_000011.9
cg12599673	0.454938	0.411944	0.417333	0.445353	0.430375	0.437814	0.451998	0.515775	0.533346	0.50764	0.495704	0.487539	0.00104892	0.0355127	0.0657075	37	15	71408847	CGGTGCTGGGTGCGGACTGCTTAAAAAACTTACTAGACCACAAATTCCAG	R	CT62	NM_001102658	TSS1500	chr15:71407656-71408498	S_Shore			15:69195830-69196000				71408847	71408970	NC_000015.9
cg04927540	0.717606	0.703563	0.684332	0.715821	0.710288	0.747554	0.764223	0.748723	0.767403	0.804544	0.794572	0.793809	0.000327525	0.0234115	0.0656851	37	X	16891473	GGCAAGAAACCTCACCACTTTGGCTCAGCTTCCTCATGTGGTGAGCACCG	F				chrX:16887742-16889250	S_Shelf							16891473	16891596	NC_000023.10
cg24109894	0.657022	0.700069	0.653767	0.647332	0.662437	0.631192	0.725786	0.729269	0.693424	0.700935	0.739037	0.757347	0.000662773	0.0299256	0.065663	37	1	36108212	CGCCCCCGTGCCCTGCCGGGTCTTTTAAAAATGGTATTGTCTCACCCGGC	R	PSMB2	NM_002794	TSS1500	chr1:36106969-36107261	S_Shore	DMR						36108212	36108335	NC_000001.10
cg11311332	0.34772	0.348956	0.369144	0.355852	0.383145	0.432568	0.416067	0.447947	0.448081	0.443103	0.461647	0.414428	0.00252588	0.0495511	0.0656482	37	7	131433049	CACTTGGAGACAGCTCTTCTTTCTTATTATTTGTGCTCAAATCTTATTCG	F							TRUE					131433049	131433172	NC_000007.13
cg06107487	0.76207	0.745887	0.733078	0.731348	0.745692	0.789871	0.847004	0.826119	0.821191	0.801662	0.826461	0.779219	0.000537825	0.0278683	0.0656187	37	2	134068922	CGAGGTATGGGAGAAGGGGTTCAGAACTTCCATGCTCTCTCCTGGCACAC	F	NCKAP5;NCKAP5	NM_207363;NM_207481	Body;Body									134068922	134069045	NC_000002.11
cg27104173	0.818666	0.802455	0.863284	0.856104	0.866864	0.842655	0.881712	0.889688	0.919831	0.903991	0.906477	0.941733	0.000847185	0.0329271	0.0655674	37	7	157744316	CGATGTTCCCGTGATCAGAATCACGGGCTAACGTCCCTCCGCTTCCGCAG	F	PTPRN2;PTPRN2;PTPRN2	NM_002847;NM_130842;NM_130843	Body;Body;Body					7:157437077-157437123				157744316	157744439	NC_000007.13
cg13041244	0.430969	0.486645	0.441397	0.46655	0.440055	0.425284	0.501345	0.520161	0.562962	0.505371	0.494424	0.49979	0.000951196	0.0342716	0.0655252	37	11	19284694	CGACAGTATTTGATTCCTTGGGTGTAATGCAGAGCTCAATATACTCAAAA	F							TRUE					19284694	19284817	NC_000011.9
cg01443166	0.792449	0.793029	0.826582	0.813842	0.806849	0.837009	0.866603	0.870639	0.884692	0.872304	0.903325	0.865304	4.89e-05	0.0122532	0.065518	37	10	27607960	GGTGCACACCTGTTTTCTTTTCCTTTGCAGCACTTATCTCCTAATATTCG	F				chr10:27608674-27608892	N_Shore							27607960	27608083	NC_000010.10
cg17108958	0.678645	0.643655	0.640199	0.67443	0.714475	0.67255	0.715661	0.734184	0.752627	0.714213	0.760026	0.740331	0.000905022	0.0336657	0.0655147	37	1	221129545	CGGACAATGATTGGTACAGGACTCCCAGAAGGGAGGAATGCCCACATCAC	R							TRUE					221129545	221129668	NC_000001.10
cg00281048	0.102731	0.0958008	0.121168	0.100265	0.110812	0.109661	0.191854	0.192259	0.158193	0.122212	0.165389	0.203438	0.00229518	0.0477895	0.0654847	37	4	80573233	AGCTCAGCCACCACCCAACAAATTAAAATGAGTCCTTAAAAAATAATACG	R							TRUE					80573233	80573356	NC_000004.11
cg07829289	0.695053	0.679029	0.666417	0.657975	0.687371	0.729616	0.715976	0.744247	0.75309	0.740318	0.758222	0.796232	0.00138016	0.0393648	0.0654374	37	5	158894390	ACCACCTCTCTCCTACCTTAGCCTGGTGAACTCGTATTCACCTTATTACG	R	LOC285627	NR_027110	TSS1500									158894390	158894513	NC_000005.9
cg05111988	0.689283	0.636254	0.697789	0.656216	0.700348	0.690012	0.715634	0.750144	0.744446	0.763445	0.739411	0.749414	0.000683626	0.0302933	0.0654318	37	15	52045999	TGTTTTCTTCTTGATTCACCAACCGTCATCATTCTGCCACATTTGCTACG	F	TMOD2;TMOD2	NM_014548;NM_001142885	5'UTR;5'UTR	chr15:52043422-52044447	S_Shore							52045999	52046122	NC_000015.9
cg13252226	0.235051	0.247918	0.266448	0.271106	0.240474	0.263592	0.304452	0.303106	0.29927	0.34667	0.336701	0.326899	0.00010701	0.0159931	0.0654181	37	6	30135162	TCATGGTCTGAGATCCCAAATGCCTTTGTGCAGCCACAGGAAGGTGAACG	F	TRIM15	NM_033229	Body									30135162	30135285	NC_000006.11
cg21368161	0.521669	0.536567	0.526799	0.58064	0.534524	0.563295	0.616537	0.629868	0.571424	0.604775	0.625217	0.607985	0.00044588	0.0262028	0.0653853	37	7	1596136	CGGCCCTCCTTGGCCTGCCGCAGACCTCTCCCACGTGTCCCCACCAGGTG	R	TMEM184A	NM_001097620	TSS200						7:1594906-1596387	Unclassified_Cell_type_specific		1596136	1596259	NC_000007.13
ch.5.3268483F	0.122152	0.0800895	0.117726	0.0747306	0.0899163	0.117628	0.15638	0.1877	0.183587	0.131798	0.131379	0.20363	0.00200954	0.0453171	0.0653718	36	5	171653553	CAGGGCAACACTCACCAACAGCAATGTCACAAAGGATCAAGGTTTCATAA	F	UBTD2	NM_152277	Body									171653553	171653676	NC_000005.9
cg16005240	0.853396	0.821428	0.828716	0.797695	0.838685	0.814475	0.900428	0.88214	0.890147	0.873679	0.882287	0.917923	9.37e-05	0.0152329	0.0653683	37	11	32847480	CGCACCGGAGCTGCCCCCAGGGACCTATGACAGGGACTTGTGTCATGGCT	R				chr11:32851160-32851951	N_Shelf							32847480	32847603	NC_000011.9
cg07805981	0.235794	0.247745	0.254382	0.259851	0.310955	0.253915	0.311754	0.304894	0.295413	0.361658	0.340833	0.340249	0.00137704	0.0393218	0.06536	37	12	56075321	CGCCCACATAAAAGTCATTGAAGAGCTTGTGGGGCTGTGGGACCTGCGCC	F	METTL7B	NM_152637	TSS200				TRUE		12:56075052-56075901	Unclassified	TRUE	56075321	56075444	NC_000012.11
cg17882587	0.745604	0.714686	0.70161	0.735969	0.723165	0.743275	0.797147	0.799571	0.812732	0.820256	0.785122	0.74156	0.00109574	0.0360747	0.0653466	37	2	18933408	AAATAACTGGAGTGAAGGCCAACTGCTGCTTAACAGCTTCCCCAGTTACG	R							TRUE					18933408	18933531	NC_000002.11
cg15012027	0.760908	0.737157	0.767915	0.730593	0.782539	0.810664	0.83447	0.836265	0.822347	0.806709	0.841619	0.840444	0.00171735	0.0426681	0.0653462	37	2	99351550	CGGCTGTCCCAGAACTGTGCGTTTGTAGCATTGTACTATGGTTTAATTAC	R				chr2:99346882-99348177	S_Shelf							99351550	99351673	NC_000002.11
cg00397059	0.666807	0.634386	0.709227	0.662252	0.650404	0.700735	0.714674	0.715862	0.759011	0.714046	0.745257	0.767006	0.00184202	0.0438474	0.065341	37	6	132031294	CGGATGATGATAACCTGGAATTAAAAGTGAACAGTCAATGGGAAAATGGT	R	CTAGE9;ENPP3	NM_001145659;NM_005021	1stExon;Body									132031294	132031417	NC_000006.11
cg13927605	0.282413	0.283313	0.244721	0.259412	0.249549	0.295731	0.295528	0.339413	0.327741	0.329623	0.337152	0.377718	0.000888927	0.033445	0.0653393	37	1	179199424	CGCACTGGCCTGGATTGTGTGCCTTCTATAGTCTCATTGGGGACGCAATT	F	ABL2;ABL2;ABL2;ABL2;ABL2	NM_007314;NM_001168236;NM_001168238;NM_001168237;NM_001136001	TSS1500;TSS1500;TSS1500;TSS1500;TSS1500	chr1:179198163-179199200	S_Shore							179199424	179199547	NC_000001.10
cg21126680	0.803859	0.812158	0.809747	0.798842	0.827266	0.850897	0.898588	0.881863	0.885076	0.848566	0.896815	0.883529	0.000120338	0.0166524	0.0652779	37	12	118589026	CGCGTGCACGTGGGTGCCTGTTAGGAGATGCTTTCCATTAAGAACTGCAT	R	TAOK3	NM_016281	Body					12:117073312-117073477				118589026	118589149	NC_000012.11
cg08066024	0.832872	0.826231	0.866091	0.81429	0.780405	0.858019	0.87959	0.88758	0.898313	0.886378	0.921737	0.895933	0.00220541	0.0470102	0.0652708	37	2	51057548	ATCCACATGCCGACATGACACAGGGATTTTATTGTGAATTGTCACACACG	R	NRXN1;NRXN1	NM_004801;NM_001135659	Body;Body			CDMR						51057548	51057671	NC_000002.11
cg15271813	0.729521	0.674769	0.687055	0.703009	0.681056	0.719716	0.806735	0.757078	0.760325	0.757698	0.728982	0.775849	0.000861409	0.0331062	0.0652569	37	3	149421667	CGCCAGCATCTGCTTCTGATGGGGACTCAGGAAGCTTCCAATCATGGCAG	R	WWTR1	NM_001168278	TSS1500									149421667	149421790	NC_000003.11
cg02124498	0.71153	0.675706	0.68534	0.676244	0.695412	0.707061	0.747445	0.801214	0.723473	0.74343	0.756103	0.770709	0.000828605	0.032665	0.0651804	37	3	108020451	CGGAAGAAAATAGGAATATAAGAGACAAGGACAATTGAAATAATTGGGGG	R	HHLA2	NM_007072	TSS1500									108020451	108020574	NC_000003.11
cg24892602	0.491755	0.489916	0.491317	0.450341	0.481506	0.520126	0.541535	0.550356	0.566835	0.535513	0.558413	0.563246	0.000281961	0.0222094	0.0651564	37	8	29830179	ATGATTCAGTTACCTCCACCTGGTCTCTCCTTTGACATGTGGGGATTACG	R							TRUE					29830179	29830302	NC_000008.10
cg03955314	0.743858	0.734066	0.743479	0.748453	0.778445	0.738855	0.851107	0.813819	0.815716	0.798792	0.812438	0.786058	0.000214413	0.0201576	0.065129	37	12	31118985	GGGTGTCTGATCTTTTGGCTTCCCTGGGCCACACATAAAACACAGTAACG	F	TSPAN11	NM_001080509	Body						12:31118223-31119418	Unclassified_Cell_type_specific		31118985	31119108	NC_000012.11
cg17112382	0.762204	0.765903	0.771197	0.778013	0.785945	0.788458	0.82187	0.809647	0.874209	0.849379	0.846396	0.840979	0.000344425	0.0237647	0.0651266	37	10	21676930	CGAACTGGTGCAGGGTAAGAGCAGCCTGGGACATTCTGAAAAGGTCAGTG	F								10:21716838-21717072				21676930	21677053	NC_000010.10
cg00551146	0.223572	0.212059	0.233174	0.240857	0.291706	0.23714	0.275928	0.272495	0.305084	0.322638	0.313586	0.339452	0.00187198	0.0440892	0.0651126	37	10	14014579	AGTTAATTTCTACCTGTAGCTTACCCAACATGCATTAAAATAGCAAGACG	F	FRMD4A	NM_018027	Body				TRUE					14014579	14014702	NC_000010.10
cg03642472	0.497313	0.475501	0.515557	0.488421	0.49301	0.509617	0.562654	0.526923	0.557203	0.580167	0.590325	0.552791	0.000239867	0.0208471	0.0651075	37	6	145670687	CGGACACCAGGCTGGGTTTGGAAGACCAATCCAGGCAGGGTGATGCCAGA	R							TRUE					145670687	145670810	NC_000006.11
cg06294475	0.727342	0.691167	0.685299	0.700827	0.708928	0.756961	0.759035	0.738014	0.802754	0.773748	0.815885	0.771731	0.00219269	0.0469096	0.0651071	37	11	2698623	CGATGCCTAGATAAGCATTTCAGAGGACAGCAGGGGAGATGATAATTGAT	F	KCNQ1;KCNQ1OT1;KCNQ1	NM_000218;NR_002728;NM_181798	Body;Body;Body			RDMR						2698623	2698746	NC_000011.9
cg09884225	0.104866	0.0581218	0.0938308	0.0691541	0.0971781	0.0977168	0.14841	0.118245	0.207522	0.135237	0.142582	0.159138	0.00195238	0.0447625	0.0650443	37	8	24768802	CGAGATGACTCTGCAGAGAGACATTTACAAGGAAACACATGTCTAACTTC	R				chr8:24770908-24772547	N_Shelf		TRUE					24768802	24768925	NC_000008.10
cg19214594	0.240074	0.212734	0.248598	0.268063	0.265905	0.241849	0.304886	0.324367	0.305031	0.284606	0.312445	0.335955	0.000158045	0.0180194	0.0650111	37	22	50629038	CGGCAGCCTTGCGCTGCTCTAATGGTCCGGACTTCCGTGTGTGAGTTTCC	F	TRABD	NM_025204	5'UTR	chr22:50628949-50629249	Island		TRUE	22:48971077-48971376	22:50628360-50630309	Promoter_Associated	TRUE	50629038	50629161	NC_000022.10
cg01033001	0.320429	0.353872	0.306893	0.282758	0.302336	0.300552	0.379427	0.368669	0.350931	0.420592	0.399599	0.337647	0.00249411	0.0492969	0.065004	37	14	94637734	GGATCTCTGTTTTCCTTATCTGAACTGCTTTCATGCATGTTGTCTCAACG	F				chr14:94640366-94641648	N_Shelf							94637734	94637857	NC_000014.8
cg15032098	0.248722	0.224278	0.246845	0.214646	0.260287	0.257843	0.334842	0.286175	0.323342	0.293198	0.289445	0.315486	0.000177744	0.0188096	0.0649778	37	4	41258560	CGAATGAATGTAAATGTGTGCCCCCCGCCCCAAATCTCTCAGCAGTTTGC	R	UCHL1	NM_004181	TSS1500	chr4:41258759-41259867	N_Shore	CDMR						41258560	41258683	NC_000004.11
cg21516044	0.182878	0.168263	0.142941	0.154753	0.133603	0.150149	0.236312	0.234357	0.217432	0.163988	0.240384	0.229898	0.00136086	0.0391087	0.0649641	37	4	166304596	CTTTATTAACTTATGTCTAAGTAATGGATTCTGTGTTCCCAGACCACTCG	R	CPE	NM_001873	Body	chr4:166299975-166300668	S_Shelf							166304596	166304719	NC_000004.11
rs2468330	0.319959	0.300824	0.3215	0.297895	0.316709	0.319823	0.386002	0.357496	0.381439	0.358768	0.408354	0.373645	9.38e-05	0.0152423	0.0648322																				rs2468330
cg15946224	0.497676	0.491212	0.52895	0.497916	0.535934	0.553228	0.563207	0.561292	0.574018	0.590771	0.604663	0.599477	0.000658991	0.0298889	0.0647521	37	14	56555040	TTACACTGTTTACAGGGTTTGTAGTGGCACCAGCCACATTACCATATTCG	F							TRUE					56555040	56555163	NC_000014.8
cg10874644	0.801992	0.784952	0.858429	0.789105	0.804458	0.846727	0.890916	0.903298	0.881409	0.851468	0.881875	0.865087	0.00212015	0.0462206	0.0647315	37	5	83898708	CGCAAAAGAAGCTGTGGTTTAGGTGGCAAAGCATATTAATTGTTTTGTAC	F							TRUE					83898708	83898831	NC_000005.9
cg02737554	0.464239	0.49391	0.508261	0.478117	0.48689	0.526324	0.547993	0.539492	0.581752	0.548401	0.572202	0.556042	0.000242449	0.0208848	0.0646903	37	3	36690229	CGGGCATAGATTTACTGTGAATGAGTCACACACAAATGAATGAGTTTGAA	R							TRUE					36690229	36690352	NC_000003.11
cg16526477	0.58348	0.625737	0.609333	0.605255	0.634525	0.632365	0.648474	0.715631	0.711102	0.640543	0.674645	0.688422	0.00235156	0.0482094	0.0646867	37	11	50254503	CTATGAGGAATAATGAGTTGATTAATGTCGACTTTCCCAATCCACATTCG	R	LOC441601	NR_003034	Body	chr11:50257255-50257772	N_Shelf							50254503	50254626	NC_000011.9
cg11230031	0.742703	0.738735	0.784284	0.774044	0.817937	0.796573	0.832117	0.845602	0.841965	0.823733	0.824279	0.874608	0.0021539	0.0465603	0.0646714	37	6	165115084	CGGCAGGAACCCAGACAACCAGGGTGCCTGCATCACTCTGTGTGGTTTTC	F							TRUE					165115084	165115207	NC_000006.11
cg01173941	0.680623	0.664635	0.686075	0.691442	0.670484	0.687709	0.758118	0.717236	0.730448	0.75582	0.727476	0.77988	0.000507085	0.0273447	0.0646683	37	7	144262949	CGAGCAAAAAGGGAGGCATTAAAAATATGCAAACAGAGAATAGGGGATTA	F	TPK1;TPK1	NM_022445;NM_001042482	Body;Body				TRUE					144262949	144263072	NC_000007.13
cg05990805	0.84174	0.770588	0.808118	0.77264	0.779297	0.801621	0.835262	0.873505	0.871274	0.866592	0.839911	0.875303	0.00103647	0.035348	0.0646405	37	3	126370678	CGTCTACTTGGGATTGATATTAGTAATAGGAGTGGGGATTCAGTTTGTTT	R				chr3:126373571-126374142	N_Shelf							126370678	126370801	NC_000003.11
cg21967368	0.0913972	0.0590948	0.0720265	0.0479611	0.0495795	0.0615451	0.144497	0.119678	0.174244	0.0798109	0.117973	0.133118	0.00242538	0.0487898	0.0646197	37	2	211422328	CGTCTTCATAAAGTTGCAGGAAGGAGCAGAGGTTCCTACAGGAATTTCAT	R	CPS1;CPS1	NM_001122633;NM_001875	Body;Body				TRUE					211422328	211422451	NC_000002.11
cg16408865	0.614835	0.591516	0.617501	0.59912	0.601747	0.648012	0.668618	0.681454	0.624967	0.708917	0.708035	0.668356	0.0023492	0.0481901	0.0646028	37	12	69753119	CGGAAGTAATTTTCCCTCAGAGTTTTGAAGACAGTGCCGTATGGCTTCCT	F	YEATS4	NM_006530	TSS1500	chr12:69753445-69754088	N_Shore				12:69752854-69754366	Promoter_Associated		69753119	69753242	NC_000012.11
cg18453200	0.600879	0.634805	0.615721	0.645227	0.629718	0.682001	0.725778	0.671202	0.727218	0.676171	0.714451	0.680877	0.00199256	0.0451592	0.0645576	37	2	75941939	CGGCTGAGTTCAGAGCCATCTGCTAATGTGGACTCATTGTTTACTTTCCC	F				chr2:75937657-75938139	S_Shelf							75941939	75942062	NC_000002.11
cg21147829	0.759199	0.719252	0.773324	0.734273	0.720492	0.775056	0.804046	0.794933	0.809918	0.791541	0.817888	0.850451	0.000856943	0.0330566	0.06453	37	12	66521713	CGGTGGAGAGGATTCAGAACACAAGTGGAGAAACTGGCCTTGGAGAGAAC	F	LLPH	NM_032338	Body	chr12:66524464-66524792	N_Shelf							66521713	66521836	NC_000012.11
cg19016967	0.787445	0.748933	0.771199	0.796662	0.822051	0.794928	0.846255	0.817199	0.863191	0.845553	0.883978	0.852119	0.000800999	0.0322708	0.0645126	37	17	61921811	CAGTGACTTTAACAATTCCAGTGGCCAGTCCCCAGACTGACAGGTTATCG	F	SMARCD2;SMARCD2	NM_001098426;NM_003077	TSS1500;TSS1500	chr17:61919659-61920656	S_Shore	RDMR						61921811	61921934	NC_000017.10
cg07274922	0.675115	0.697293	0.699829	0.642528	0.669297	0.707251	0.716704	0.742285	0.718631	0.754153	0.799204	0.746749	0.00241952	0.0487353	0.0644022	37	X	55102690	CGTTGGTTCAGGAATATTATATTCTGGTGTTACCTGTATGGATATGGATA	F	PAGE2B	NM_001015038	Body									55102690	55102813	NC_000023.10
cg08890976	0.775658	0.772165	0.70894	0.729692	0.775425	0.768121	0.819226	0.805242	0.813643	0.804391	0.83826	0.835328	0.00143695	0.0399432	0.0643481	37	12	100538115	CGTAAGGAGGCAGTGTTAGGCTAAACTTGACTTAACACTGAGTAATTTTT	R	UHRF1BP1L;UHRF1BP1L	NM_001006947;NM_015054	TSS1500;TSS1500	chr12:100535916-100536620	S_Shore							100538115	100538238	NC_000012.11
cg12027135	0.739433	0.684896	0.699142	0.713561	0.727284	0.733498	0.818919	0.734951	0.761313	0.776796	0.800504	0.791407	0.00195837	0.0448007	0.064346	37	4	119276652	CGCTGTGATGTGACAGGTAGAAGAGGGAGAAATGCATTTCAGAGATTGAA	R				chr4:119273305-119274458	S_Shelf							119276652	119276775	NC_000004.11
cg12768145	0.363956	0.309742	0.373718	0.35797	0.350588	0.353327	0.372718	0.402271	0.443129	0.418481	0.440496	0.418203	0.00103948	0.0353862	0.0643329	37	10	12839595	TCAACTGGAAATCATAACAAACAATCGATGCCTGCTGTAATCAAACTACG	F	CAMK1D;CAMK1D	NM_020397;NM_153498	Body;Body				TRUE					12839595	12839718	NC_000010.10
cg13568956	0.705728	0.656765	0.678088	0.659164	0.657032	0.692592	0.742882	0.696546	0.738753	0.739023	0.745513	0.772504	0.000662192	0.0299167	0.0643086	37	8	137938192	CCAGCTCCTCAAAGAATGATCTCTAACTTTTTTTCCACAGAGAGCACTCG	R							TRUE					137938192	137938315	NC_000008.10
cg02545984	0.374631	0.345363	0.375821	0.398503	0.340207	0.366843	0.451269	0.402017	0.425434	0.443146	0.41173	0.453409	0.00041259	0.0254534	0.0642727	37	4	174537658	AATGTTTCCTCATTTTCAACAGTAGGATCTACCTGGGCCCTTTTCTTTCG	R	MORF4	NM_006792	1stExon									174537658	174537781	NC_000004.11
cg25391820	0.542921	0.570907	0.5683	0.521826	0.58063	0.542678	0.595734	0.567936	0.641862	0.63406	0.632082	0.64103	0.00221506	0.0470937	0.0642403	37	5	138608519	CGGCTGTCACAGCGTGTTCATAAAGGAAGGTTATGAGAGCTATAAAACCA	R	MATR3;SNHG4	NM_199189;NR_003141	TSS1500;TSS1500	chr5:138609320-138609851	N_Shore		TRUE		5:138608176-138608679	Unclassified_Cell_type_specific		138608519	138608642	NC_000005.9
cg08977887	0.452665	0.452348	0.435411	0.459358	0.427398	0.453614	0.490424	0.491128	0.494039	0.506631	0.519047	0.564939	0.00161392	0.0416158	0.0642358	37	8	98963918	CGGTTTGGAAATTGAAAAGCACTCTACAGGAGTAGGACATTATTTTTGTT	F	MATN2;MATN2	NM_030583;NM_002380	Body;Body				TRUE		8:98963918-98964058	Unclassified_Cell_type_specific		98963918	98964041	NC_000008.10
cg05782975	0.246571	0.256764	0.248694	0.259657	0.274758	0.269339	0.321802	0.320752	0.35087	0.351205	0.29484	0.30171	0.000517072	0.0274767	0.0642327	37	X	102631408	GATCCTGCTGCACTGGCCGCCCAAGTTGGGGGGCGAGCTCGGTGGTGACG	R	NGFRAP1;NGFRAP1;NGFRAP1;NGFRAP1;NGFRAP1	NM_014380;NM_206917;NM_206917;NM_206915;NM_206915	TSS1500;1stExon;5'UTR;1stExon;5'UTR	chrX:102631321-102632073	Island	DMR		X:102518033-102518923	X:102630976-102632427	Unclassified_Cell_type_specific	TRUE	102631408	102631531	NC_000023.10
cg05699739	0.579437	0.585871	0.537969	0.590767	0.56775	0.575655	0.635406	0.59857	0.613697	0.646414	0.638438	0.68997	0.00248935	0.049265	0.0641745	37	13	47373579	CACTAGCTAGATGCCAGTGGTACCCCTAACAAGCTTAGATACCCAAAACG	R				chr13:47370763-47371484	S_Shelf							47373579	47373702	NC_000013.10
cg14800532	0.528284	0.525998	0.582792	0.551355	0.538475	0.576738	0.590446	0.617884	0.592386	0.642635	0.653692	0.591538	0.00182251	0.0436736	0.0641566	37	4	139238668	AAAAGGAATACCACCAGGCAAATTGTTTTCAAATCTATCTAATTTCTTCG	R							TRUE					139238668	139238791	NC_000004.11
cg12728097	0.758595	0.69743	0.741478	0.764281	0.754646	0.727936	0.815265	0.760393	0.799283	0.809549	0.819218	0.825591	0.00101571	0.0351483	0.0641556	37	1	28154501	TCTTTACTCCTTGGCCATGTTCTGTTTCTAGCACAGTAGATATTCACACG	F				chr1:28157221-28157788	N_Shelf							28154501	28154624	NC_000001.10
cg03460239	0.623122	0.659114	0.665628	0.68867	0.683093	0.661305	0.71125	0.680435	0.738035	0.72134	0.761433	0.753225	0.00220466	0.0470026	0.0641311	37	11	124311153	CGGGGCTTGCTCCAGAGGGAGCCGCAGCAAAGCCCCCTCTGCTGAAGTTC	R	OR8B8	NM_012378	TSS200									124311153	124311276	NC_000011.9
cg24960118	0.777994	0.722498	0.775376	0.748397	0.76824	0.753896	0.817788	0.787959	0.815335	0.824007	0.830419	0.855676	0.000419562	0.0256183	0.0641308	37	6	51815507	TTGTATTTTCTCAGCCTGTTTCAGATGATGCCAAACATCACCAGCCTACG	F	PKHD1;PKHD1	NM_138694;NM_170724	Body;Body									51815507	51815630	NC_000006.11
cg01021743	0.750635	0.773113	0.747019	0.767464	0.759338	0.77304	0.804874	0.817642	0.844374	0.798885	0.843348	0.846128	0.000242225	0.0208816	0.0641067	37	2	222541659	TTGGTTAGTCACTTGTGTTTCATCTCTCCAACAGTCCCCTTCCAGGCTCG	F							TRUE					222541659	222541782	NC_000002.11
cg13462557	0.332991	0.332756	0.302955	0.291603	0.283726	0.305948	0.344286	0.357638	0.356335	0.37863	0.415009	0.382686	0.000813983	0.0324389	0.0641009	37	1	62499140	CGGGAATGCTCAAGGATAAACAGGGGTTCAGAATTCCCTTCTGCTGACAT	R	INADL	NM_176877	Body				TRUE					62499140	62499263	NC_000001.10
cg16239218	0.496781	0.498855	0.523471	0.545365	0.521652	0.537588	0.563826	0.555759	0.611547	0.579851	0.595209	0.602074	0.000359779	0.0241198	0.0640924	37	10	117715809	CGAGAACAACTTGAAAAACGAAGATTGCCCATTAGAAAAGGGAGACTATG	R							TRUE					117715809	117715932	NC_000010.10
cg22537343	0.778071	0.79079	0.763672	0.755199	0.791076	0.775721	0.789398	0.836097	0.836856	0.858532	0.862031	0.85614	0.00106589	0.0357006	0.0640876	37	19	54199481	CGCTCTCTTCTTGATTGTGTATGGGCTCACTTAAGGTCAGGAGTTGGAGA	R	MIR525	NR_030192	TSS1500									54199481	54199604	NC_000019.9
cg02125365	0.626784	0.601323	0.642435	0.624512	0.619662	0.661092	0.712968	0.712806	0.679393	0.690732	0.674709	0.689698	0.000159572	0.0180985	0.0640831	37	5	78813058	CCTTTAGAGTGCTGACCCTTTGTTAGTTTCTACTTTTCACAACCACATCG	R				chr5:78809347-78810468	S_Shelf				5:78812903-78813118	Unclassified_Cell_type_specific		78813058	78813181	NC_000005.9
cg27664783	0.237913	0.229468	0.23341	0.201668	0.283478	0.22091	0.257088	0.292374	0.30226	0.302116	0.299784	0.337554	0.00186629	0.0440419	0.0640544	37	7	128693986	GGGTATCACTGCTGCTTTGATTATTCCATATAAAACTGTGTGTGCATCCG	F	LOC286016;TNPO3	NR_002187;NM_012470	TSS1500;Body	chr7:128694513-128695357	N_Shore							128693986	128694109	NC_000007.13
cg01287788	0.564905	0.618205	0.55583	0.569842	0.564653	0.61822	0.642292	0.601317	0.674481	0.661957	0.65075	0.645124	0.00205864	0.045697	0.0640444	37	2	86362935	AAGTGTGTGCCAAACTGCCTGCGCTAACAACCAAATGCAAATGTCATACG	F	SNORD94;PTCD3	NR_004378;NM_017952	TSS200;Body									86362935	86363058	NC_000002.11
cg08801446	0.645745	0.648608	0.655919	0.639809	0.65087	0.659484	0.701531	0.726322	0.713876	0.729928	0.683128	0.729894	0.000170218	0.018472	0.0640404	37	2	36626126	TCCATGTTGGCCTCACTTCTGAAATCTATCATCATCACTATTCTAAATCG	F	CRIM1	NM_016441	Body				TRUE					36626126	36626249	NC_000002.11
cg10482057	0.683712	0.617488	0.639176	0.702574	0.661447	0.652306	0.725533	0.728032	0.729553	0.685236	0.733669	0.738803	0.0021954	0.0469371	0.0640203	37	6	24583614	CGTTTAATTGGTCAGGATGGAAAGTCATAAATTTCTGATGATGCAAAGCA	R	KIAA0319;KIAA0319;KIAA0319;KIAA0319;KIAA0319	NM_001168375;NM_001168374;NM_014809;NM_001168377;NM_001168376	Body;Body;Body;Body;Body									24583614	24583737	NC_000006.11
cg01397070	0.612848	0.583222	0.642443	0.591267	0.593207	0.61531	0.675424	0.634916	0.66075	0.662172	0.703837	0.685036	0.000646176	0.0297016	0.063973	37	3	161213521	CGTCATGTTCCAGTTCTCAAGGGGGAATGGAGAGCTGTTGTGAGACCTGA	F	OTOL1	NM_001080440	TSS1500									161213521	161213644	NC_000003.11
cg16484450	0.770778	0.728636	0.766813	0.704125	0.758157	0.770873	0.805492	0.809295	0.814584	0.796651	0.84863	0.808438	0.0011483	0.036702	0.063951	37	15	100350984	CGGATCTACAATATTGTTGAGTGAAAAAGCAGATTACAAGAAAAATCTGA	R				chr15:100346724-100347454	S_Shelf							100350984	100351107	NC_000015.9
cg14462124	0.276905	0.280069	0.310066	0.299229	0.315255	0.28534	0.32439	0.377049	0.319341	0.393076	0.37297	0.363517	0.00193227	0.044624	0.0639134	37	2	197031748	CGGCAGGAAATGTAGCTGGTGTATACTTGGCCTCAGAGGCCTTTATGTGT	R	STK17B	NM_004226	5'UTR	chr2:197035589-197036383	N_Shelf		TRUE					197031748	197031871	NC_000002.11
cg22382137	0.760953	0.790516	0.802947	0.760154	0.783446	0.818812	0.856395	0.827596	0.829821	0.854214	0.891519	0.840675	0.000799363	0.0322566	0.0638987	37	1	115267908	CTTTTTCTGCACTGACTTTGTTGCCTTTGCCTTTGGACAAGCTATACTCG	R	CSDE1;CSDE1;CSDE1	NM_001007553;NM_001130523;NM_007158	Body;Body;Body				TRUE					115267908	115268031	NC_000001.10
cg21466736	0.722984	0.70831	0.713154	0.724253	0.711805	0.756148	0.758038	0.766593	0.80686	0.826745	0.77663	0.785081	0.000780564	0.0319635	0.0638821	37	12	48725269	TACACCTGACCAAGCTTTTCCTCAGGAGAGTCTTATATCTCCTACAAGCG	R				chr12:48723323-48723876	S_Shore							48725269	48725392	NC_000012.11
cg26245936	0.776376	0.747189	0.752356	0.761292	0.750822	0.774492	0.8382	0.821062	0.861216	0.789751	0.787893	0.847618	0.00238495	0.0484623	0.0638687	37	13	91624536	CGGCAGAGTCTACTACAGTGCTAATAGGCTAACTCTGGCTTCCATGGGGA	F							TRUE					91624536	91624659	NC_000013.10
cg02241136	0.682473	0.69389	0.706649	0.668161	0.699695	0.725674	0.751896	0.730594	0.767414	0.757656	0.76602	0.785794	0.000182994	0.0189272	0.0638054	37	11	573673	AAACAGTTTGTGCCTTCAGTCTCTTGCTTCGGCACCTAGGTAATCTTTCG	F				chr11:575464-577093	N_Shore							573673	573796	NC_000011.9
cg24203800	0.165174	0.163247	0.166829	0.178688	0.182582	0.190181	0.214848	0.201941	0.24536	0.235543	0.27543	0.256368	0.00125616	0.0379236	0.063798	37	17	8702868	CCCCGCCTGGCCTCTGGCTGCCAATGTGGCCCAGGAGCCTGAGCTAAACG	R	MFSD6L	NM_152599	TSS1500	chr17:8702342-8702824	S_Shore						TRUE	8702868	8702991	NC_000017.10
cg15465051	0.741497	0.785986	0.767926	0.745054	0.764326	0.781597	0.776203	0.841545	0.856238	0.825088	0.825763	0.84427	0.00133509	0.0388035	0.0637868	37	3	110627980	AATTCACCTGAGGCACTTGTTAAACCCAACTTTCCCAGGCTCCTCGTTCG	F							TRUE					110627980	110628103	NC_000003.11
cg23782909	0.44673	0.412159	0.419235	0.437249	0.429952	0.433699	0.472934	0.50394	0.512954	0.518364	0.491426	0.462069	0.000323326	0.0233075	0.0637771	37	12	101945864	TGCTTCAAGGTAGGATTTTACACCTCTATCTGCTGTATACTTAACCATCG	R							TRUE					101945864	101945987	NC_000012.11
cg05560728	0.225731	0.198715	0.229385	0.236699	0.232136	0.213745	0.29447	0.289359	0.262385	0.261897	0.289702	0.321161	0.000279849	0.0221605	0.0637604	37	17	6924953	AGAGATGGGCATGGATCACACCCTCATATTTTGTTTCGGGAGACATTGCG	F	BCL6B	NM_181844	TSS1500	chr17:6925400-6927527	N_Shore		TRUE		17:6924940-6926095	Unclassified		6924953	6925076	NC_000017.10
cg25243475	0.864962	0.81458	0.844979	0.826638	0.829194	0.859263	0.886585	0.914969	0.923393	0.890513	0.880752	0.925762	0.000244195	0.0209652	0.0637265	37	11	102933046	ATGCACCCGTTGGATTTTTTTCCCCCTCATCACATTAGCTTGTATACACG	R	DCUN1D5	NM_032299	3'UTR									102933046	102933169	NC_000011.9
cg19860752	0.791705	0.806864	0.826665	0.79975	0.808082	0.859711	0.849386	0.854393	0.897028	0.885138	0.880323	0.908577	0.000984709	0.0347571	0.0636776	37	18	37332566	TAACAATTGAACTCTGTTATCCACATGCACTGCATTCCTCACCACCCTCG	R	LOC647946	NR_024391	TSS1500									37332566	37332689	NC_000018.9
cg02066570	0.692638	0.695895	0.629617	0.67282	0.690885	0.710915	0.699796	0.756492	0.75496	0.735424	0.772966	0.754629	0.00227344	0.0475997	0.0635824	37	9	116661680	CGGACCTGTACTGGTCTGCAGCCTGGAGGCTGGGGACCCCTGATCTAAGT	R	ZNF618	NM_133374	Body	chr9:116662877-116663478	N_Shore							116661680	116661803	NC_000009.11
cg26023960	0.758111	0.722058	0.757051	0.744699	0.752858	0.722477	0.759082	0.78716	0.848458	0.818788	0.824392	0.800704	0.00258544	0.0499554	0.0635548	37	14	105242373	CGGACTCCAACCCCCAGCAGGACTCCGCCCCCCAGCAGGACTCCGCCCCC	F	AKT1;AKT1;AKT1	NM_001014431;NM_005163;NM_001014432	Body;Body;Body	chr14:105240169-105240429	S_Shore						TRUE	105242373	105242496	NC_000014.8
cg26276301	0.694518	0.662516	0.68022	0.655303	0.672556	0.689248	0.756356	0.722874	0.727119	0.705318	0.755993	0.76743	0.000522344	0.0276053	0.0634547	37	5	74303397	GTTTACATATCACCCATGCCTCTCTGCAACCGCAGAGTTAAGTAGTTTCG	F							TRUE					74303397	74303520	NC_000005.9
cg09262442	0.0864802	0.0968565	0.109211	0.10117	0.111868	0.130968	0.170727	0.15449	0.173661	0.150588	0.156613	0.211065	0.000299109	0.022705	0.0634314	37	10	5728078	CGGTATGTCCTGTACTGTACATCAATAAATAACTAAGCCAGGCCAGAAAA	F	C10orf18	NM_017782	5'UTR	chr10:5726455-5727697	S_Shore				10:5727363-5728113	Promoter_Associated		5728078	5728201	NC_000010.10
cg05471881	0.724218	0.679352	0.737444	0.704902	0.685102	0.742537	0.797077	0.772181	0.792466	0.75847	0.795823	0.738036	0.00153406	0.0408277	0.0634166	37	13	65249710	CGAGAATGCTAAGTCATGATTGTTTTCTAAGCTGAGGGTCCCTATCCTTT	F							TRUE					65249710	65249833	NC_000013.10
cg07917031	0.843765	0.796268	0.873775	0.811407	0.838948	0.852545	0.893123	0.900428	0.911146	0.885401	0.88864	0.918287	0.00151465	0.0406202	0.063386	37	1	232571335	CGTCGTGTGTGCCATTTACAGGAGAATCCAGAACATGGGGTTTGTTTTTG	F	SIPA1L2	NM_020808	Body				TRUE					232571335	232571458	NC_000001.10
cg04502407	0.736972	0.745603	0.727479	0.76547	0.699141	0.780717	0.80213	0.802566	0.82517	0.806127	0.78892	0.810723	0.00183111	0.0437635	0.0633754	37	1	33805507	CGTGATACTCAAAGGAAATGCTCATTGGAGCGTTTCAGATTTTTGGATTT	R	PHC2;PHC2	NM_004427;NM_198040	5'UTR;Body				TRUE					33805507	33805630	NC_000001.10
cg00391320	0.748238	0.69967	0.7242	0.744893	0.749452	0.763449	0.820187	0.792433	0.803658	0.810418	0.76219	0.821247	0.000634954	0.0295113	0.0633719	37	12	112127825	TTGTGAGTTCCACATCTGCAGATTCAGCCAACTACAATAGAAAATATTCG	F	ACAD10;ACAD10	NM_025247;NM_001136538	5'UTR;5'UTR	chr12:112123246-112124059	S_Shelf							112127825	112127948	NC_000012.11
cg26432128	0.783971	0.786474	0.766977	0.762899	0.736477	0.786309	0.844958	0.843919	0.846054	0.81964	0.819834	0.828918	0.000116909	0.0165361	0.0633695	37	8	43105801	CGGGGATGGCTTTTCTAGAGATCATGCCTGAGCTGAGACTTAAAGAATGA	R				chr8:43101489-43102542	S_Shelf							43105801	43105924	NC_000008.10
cg08962305	0.656836	0.675995	0.634268	0.604432	0.640623	0.659538	0.705436	0.703427	0.675345	0.694073	0.732067	0.741547	0.0012349	0.0376883	0.0633674	37	3	46622647	GACCAAGCATCCCTACCTTCCAGATGGCCTTGTGATGGATGAGCACCTCG	R	LRRC2;TDGF1	NM_024750;NM_003212	TSS1500;Body	chr3:46618307-46618669	S_Shelf							46622647	46622770	NC_000003.11
cg04074157	0.784319	0.789483	0.793662	0.777773	0.823867	0.791675	0.859486	0.83915	0.864115	0.848383	0.844747	0.884838	5.14e-05	0.0123973	0.0633234	37	7	101986487	CGTGCTGCTGAAGGGAGCATGGATTTTATCTATGATACTTAGTTAACATA	R	SPDYE6	NM_001146210	3'UTR	chr7:101988784-101989041	N_Shelf							101986487	101986610	NC_000007.13
cg19795338	0.535594	0.607332	0.585774	0.587274	0.601773	0.611787	0.630149	0.69014	0.629447	0.655619	0.669396	0.634613	0.00199987	0.0452215	0.0633051	37	3	193273475	CGAGGGTAGCAAATATGACTTAACTTTTTTAGGTAGTCCCTGTGCTCAGG	R	ATP13A4	NM_032279	TSS1500									193273475	193273598	NC_000003.11
cg03171882	0.76843	0.769124	0.769666	0.783314	0.766065	0.781777	0.800844	0.834314	0.824451	0.827069	0.859239	0.872235	0.00127664	0.0381739	0.0632962	37	11	92511989	CGGGCTGCCATGGTGTTTCAAAGCACTATTGTTCTGGGTTAAGAAAGACT	F	FAT3	NM_001008781	Body				TRUE					92511989	92512112	NC_000011.9
cg07743548	0.645552	0.569605	0.617915	0.601546	0.630276	0.640088	0.691651	0.691543	0.658211	0.666407	0.675573	0.701335	0.0014586	0.040119	0.0632895	37	6	169043060	GCTACGTTGGATTGGCCAAAACTCGGTGACTGGCACAAGTGTAGGCTACG	R	SMOC2;SMOC2	NM_022138;NM_001166412	Body;Body					6:168784941-168784997				169043060	169043183	NC_000006.11
cg24393100	0.765889	0.724203	0.729136	0.7568	0.760939	0.742027	0.802296	0.796792	0.788967	0.795998	0.835383	0.839272	0.000285456	0.0223076	0.0632858	37	Y	9745653	CGCACACACCAAGGCCTGTGCTGCCCGACCCAAGCCACAGGAACCCTGCC	F				chrY:9745559-9745993	Island			Y:10355560-10355993				9745653	9745776	NC_000024.9
cg03938043	0.635666	0.611276	0.634985	0.663849	0.640529	0.64358	0.711026	0.680264	0.690357	0.713562	0.726616	0.687765	9.53e-05	0.0153254	0.0632846	37	1	212207851	CGGGAAACATTTCGGCAGCTGGTATACAATTAAATCTTGATTAATCGTAG	R	INTS7;DTL	NM_015434;NM_016448	Body;TSS1500	chr1:212208837-212209364	N_Shore							212207851	212207974	NC_000001.10
cg10092516	0.280854	0.33732	0.302367	0.288033	0.295359	0.350738	0.364385	0.355974	0.342662	0.398614	0.401725	0.370974	0.00193185	0.0446164	0.0632772	37	1	240303037	GGAGCGCTGAGAGCGCTGCCCAGATTTCAGCAGGCTGAGGTTTGGAGACG	R	FMN2	NM_020066	Body				TRUE					240303037	240303160	NC_000001.10
cg05137386	0.764115	0.766963	0.745387	0.811892	0.813897	0.795	0.847055	0.853834	0.846537	0.828913	0.834583	0.86587	0.00152669	0.040732	0.0632563	37	14	105102977	CGACCACCGTTCCTGCTCCTCTGGCGGGTGTCTTAAATGTGCTCTTGTAT	R				chr14:105103493-105103769	N_Shore			14:104174015-104174158				105102977	105103100	NC_000014.8
cg18360755	0.765633	0.737533	0.727614	0.739229	0.755019	0.736869	0.796012	0.777724	0.822035	0.813912	0.811757	0.819965	4.24e-05	0.0119242	0.0632513	37	2	65251475	CTGAAAGAGAGCAGTTGTCCATGCCTCTACTATGGCACCACCACACCTCG	R							TRUE					65251475	65251598	NC_000002.11
cg25935047	0.779217	0.792842	0.79961	0.794557	0.760772	0.813657	0.86795	0.841348	0.821686	0.859468	0.862126	0.866919	0.000130118	0.0169299	0.0631401	37	19	451092	GCCATCCACACACTGAAATATGATGTGGCTATGGTATGGCCATCCACACG	F	SHC2	NM_012435	Body	chr19:450801-451376	Island			19:401411-402385				451092	451215	NC_000019.9
cg19178561	0.585974	0.565659	0.564292	0.569855	0.582094	0.566263	0.626316	0.68666	0.640693	0.623405	0.620588	0.61522	0.00133921	0.0388583	0.0631244	37	15	23260713	CGGTCAGTAAAGATCATGGCATTTCCAAGCCCATGGTCTGGTTTTTAAAA	R	GOLGA9P	NR_024074	Body									23260713	23260836	NC_000015.9
cg19390658	0.193159	0.151496	0.183572	0.140655	0.177512	0.187181	0.264249	0.229866	0.260904	0.210109	0.204013	0.243064	0.000933165	0.0340377	0.0631052	37	7	30636176	CGGTAGTTAAGACAGGATCTAGTTAACTAAAGTAAACTTTGATCGCGGCA	F	GARS	NM_002047	Body	chr7:30634124-30635058	S_Shore				7:30636081-30636376	Promoter_Associated		30636176	30636299	NC_000007.13
cg21146273	0.692062	0.742814	0.736618	0.704714	0.690352	0.703453	0.773378	0.771608	0.786068	0.776103	0.797423	0.743873	0.000378575	0.0246054	0.0630733	37	5	152869193	AGCTGTGTTCAGGATAGTAGTGTTAAATGCAAAGCAGCAGCCACTAGCCG	F	GRIA1;GRIA1	NM_000827;NM_001114183	TSS1500;TSS1500									152869193	152869316	NC_000005.9
cg08364334	0.78421	0.780304	0.727597	0.750172	0.753113	0.786121	0.831589	0.830216	0.777589	0.835223	0.825393	0.859931	0.00159679	0.0414346	0.0630706	37	4	154601692	CGGGAAGGGTTTTAGTTAAAGAAAACTCCTAGTTTTTAGTTCGACCATTG	F				chr4:154605086-154606052	N_Shelf							154601692	154601815	NC_000004.11
cg19127208	0.620969	0.613723	0.614478	0.621841	0.62212	0.646048	0.680648	0.661503	0.702611	0.680151	0.704094	0.68813	2.42e-05	0.00999494	0.0629931	37	12	133473370	CGAGCAACCTTTCATGATGGGGTAACTGCGTAGAGGGGGAGGTTAGACTT	R								12:131983120-131983457				133473370	133473493	NC_000012.11
cg03242834	0.570881	0.568349	0.533445	0.562634	0.559082	0.576152	0.626731	0.596482	0.659518	0.600482	0.629242	0.635888	0.000438228	0.0260339	0.0629667	37	19	13317326	CGGTTTTCAAACAAGGTAGGAAAAAAGGAAAAAAGAAGCAAAGGAATCGG	F	CACNA1A;CACNA1A	NM_001127222;NM_001127221	3'UTR;3'UTR	chr19:13318046-13318812	N_Shore							13317326	13317449	NC_000019.9
cg08784110	0.51439	0.572331	0.531832	0.587763	0.547038	0.545691	0.573152	0.639373	0.615974	0.615667	0.622874	0.60978	0.0013132	0.0385286	0.0629624	37	6	160328002	AATTACCTGAAGAGTTCCAACCTGAGGCCTCCTCATGGATGGGTCAAACG	R	MAS1	NM_002377	1stExon									160328002	160328125	NC_000006.11
cg07482470	0.856915	0.81262	0.838273	0.796485	0.823463	0.842368	0.910691	0.884239	0.906306	0.87535	0.889433	0.881672	0.000275102	0.0220689	0.0629278	37	7	69124459	CGCCGCTATACCTACTAATTGGATATCCATCAGGGGATGGATACTTACAA	F	AUTS2;AUTS2;AUTS2	NM_015570;NM_001127232;NM_001127231	Body;Body;Body				TRUE					69124459	69124582	NC_000007.13
cg16332435	0.107361	0.0665861	0.0799679	0.0514632	0.0536645	0.0846029	0.153998	0.126575	0.162117	0.0999527	0.130956	0.147471	0.000559481	0.0282401	0.0629042	37	5	124894955	TAGCCAATCTTCGTTTCATTTTTCCTAGGATATACAAGATTCGTTTCTCG	F							TRUE					124894955	124895078	NC_000005.9
cg07369559	0.76717	0.737165	0.781582	0.784078	0.746613	0.745673	0.813689	0.779556	0.846524	0.823609	0.865545	0.81049	0.00223302	0.0472875	0.0628554	37	16	71559445	CGGTGTTAAATAAGGGTAACAATATCTATTTTACAGTATTGTTGTGAATG	R	CHST4;CHST4	NM_005769;NM_001166395	TSS1500;TSS1500				TRUE					71559445	71559568	NC_000016.9
cg11292332	0.815241	0.786023	0.751197	0.758986	0.750818	0.784281	0.841269	0.832604	0.859521	0.82794	0.835332	0.826931	0.000873854	0.033288	0.0628418	37	7	45801988	TCCCTTATTTATTGGCTCAAAAGACAAATATCATCTTAAATATTTCATCG	R		NR_024271	Body									45801988	45802111	NC_000007.13
cg10354926	0.120241	0.0766893	0.0847576	0.0912995	0.0776038	0.088722	0.166734	0.153826	0.178548	0.11145	0.120197	0.185269	0.0024664	0.0491057	0.062785	37	13	104905791	GCAGCTCCTCGTTGCCCACGAATCTCTTGTTTATTCCCTTAGTTTAATCG	R							TRUE					104905791	104905914	NC_000013.10
cg02129814	0.356897	0.383508	0.405726	0.39777	0.412519	0.404795	0.425331	0.426437	0.442622	0.470542	0.496628	0.47635	0.0019838	0.0450437	0.0627825	37	6	84799458	TAAAATTTGTATTGGGCCACATTCAAAGCTGTCCTGGGACACATGCCACG	F	MRAP2	NM_138409	3'UTR									84799458	84799581	NC_000006.11
cg18116815	0.780378	0.774862	0.777299	0.745362	0.804783	0.776127	0.878163	0.809492	0.823825	0.842281	0.837699	0.844037	0.00048861	0.0270483	0.0627808	37	6	46288667	ACTATTTAACCTGTTTCAATCATTCATTCATTTAGGTACCCATTGAGACG	F	RCAN2	NM_005822	Body									46288667	46288790	NC_000006.11
cg18942985	0.836358	0.826551	0.841262	0.850468	0.867775	0.866037	0.903779	0.904129	0.907742	0.936028	0.907794	0.905589	3.32e-05	0.0112608	0.0627682	37	2	128523110	CGTGTGTGTAATTTAGTGAGTAGGTGCGTATACTCATAATGTACTTACTG	R	WDR33;WDR33;WDR33	NM_018383;NM_001006622;NM_001006623	Body;Body;Body				TRUE					128523110	128523233	NC_000002.11
cg14081270	0.58768	0.577731	0.609104	0.61146	0.605228	0.642334	0.695222	0.659492	0.662696	0.657467	0.674734	0.660496	0.000321447	0.0232618	0.0627619	37	11	118286105	CGAACCATATAGTACAGGCAAGGTGGTGTATATATATAGGTGGAGATATG	R							TRUE					118286105	118286228	NC_000011.9
cg14102740	0.0997361	0.0722817	0.0925798	0.0759768	0.071311	0.0764067	0.150657	0.152879	0.164971	0.101257	0.141958	0.153001	0.000352327	0.0239055	0.0627384	37	5	72750474	TGCTCTGGAAGGCTAGCCGACCAAAGCTTTCTAGCAAAGGTGCTCACACG	F				chr5:72746989-72747587	S_Shelf		TRUE		5:72750197-72750619	Unclassified_Cell_type_specific		72750474	72750597	NC_000005.9
cg12733607	0.117591	0.0991119	0.123969	0.106058	0.115685	0.0923608	0.179261	0.183939	0.203682	0.126553	0.154544	0.183109	0.00136132	0.0391163	0.0627186	37	10	21813501	ACCCTCAATTCTACTGGCAGAATTAGGATGGACTTAGAGGGTCCTAAACG	R	C10orf140	NM_207371	5'UTR	chr10:21814786-21815716	N_Shore			10:21853507-21853559				21813501	21813624	NC_000010.10
cg02604304	0.814171	0.809838	0.805324	0.831819	0.802304	0.826571	0.862861	0.863466	0.891505	0.864569	0.883539	0.900326	3.03e-05	0.0109853	0.0627066	37	7	64451414	CGTGTGGTAGTCCGTCTGTCCACAAGAGCCTCTATGGCTGTTTGGATATT	F	ZNF117	NM_015852	TSS200									64451414	64451537	NC_000007.13
cg07369094	0.819773	0.786369	0.81644	0.808555	0.746982	0.8262	0.874261	0.864958	0.853026	0.849337	0.842981	0.895791	0.00212965	0.0462957	0.0626727	37	5	107471174	CGTGGTTTCATTCCCAAGGATATTAGTTAAGGTGGTTTCTCATCAGGATC	R	FBXL17	NM_001163315	Body				TRUE					107471174	107471297	NC_000005.9
cg13636096	0.764215	0.789558	0.771016	0.816698	0.799007	0.805836	0.861143	0.858057	0.841673	0.827039	0.868287	0.865816	0.000180239	0.0188651	0.0626144	37	10	2815015	CGGCACGGGGCCGAGGTGTCCATTGCAGAGCCACAGATCTTGGCACATGA	R				chr10:2815003-2815469	Island			10:2805010-2805324				2815015	2815138	NC_000010.10
cg03860530	0.60691	0.619974	0.612093	0.573674	0.591486	0.600294	0.624113	0.682187	0.68353	0.64357	0.65718	0.689487	0.000941742	0.0341387	0.0626058	37	2	43034082	CGCATTCAGAGGCTTCCAAAGTGATTCCATTTTAATGGGTAGCGGGGGAT	R				chr2:43036978-43037638	N_Shelf							43034082	43034205	NC_000002.11
ch.14.297819F	0.153853	0.138416	0.155484	0.12524	0.161996	0.13633	0.179703	0.208314	0.24957	0.177398	0.221187	0.210404	0.00121557	0.0374484	0.0625429	36	14	35165404	CAGCCATTTGACCTGGCCATGACATCCAAACCTGGAACCAGTGGACTTGT	F												35165404	35165527	NC_000014.8
cg02394698	0.763706	0.788481	0.823968	0.808122	0.808093	0.800176	0.850906	0.866815	0.864589	0.844804	0.875825	0.864702	0.000219829	0.0202664	0.0625157	37	4	86594376	TGTTCAAGTGCACTTCCCTTTAGTGGCCTGGATTCAGAGATTCTCTATCG	R	ARHGAP24	NM_001025616	Body				TRUE					86594376	86594499	NC_000004.11
cg00353571	0.856542	0.863505	0.857492	0.859965	0.877141	0.85389	0.927426	0.92727	0.947106	0.914209	0.910822	0.916636	7.02e-06	0.00686049	0.062489	37	19	49238653	CGCTGCGCCGCAAAGACAAGTTTTCTGAGCGCTCCTTGCCTCCAGACCCA	F	RASIP1	NM_017805	Body	chr19:49238427-49238813	Island			19:53930255-53930605			TRUE	49238653	49238776	NC_000019.9
cg16586023	0.77349	0.810675	0.830797	0.792882	0.776015	0.785154	0.847317	0.862913	0.880588	0.840382	0.882847	0.829862	0.000595481	0.0288632	0.0624828	37	19	3002438	CGTGGAGATCCTGCACGTCCGCAAGCCGGAGAAATACCAGCTGCACCTCC	R	TLE2;TLE2;TLE2	NM_003260;NM_001144762;NM_001144761	Body;Body;Body	chr19:3006273-3006721	N_Shelf							3002438	3002561	NC_000019.9
cg17828255	0.768448	0.756969	0.75174	0.777286	0.767647	0.796001	0.813863	0.816774	0.855694	0.799142	0.830526	0.876703	0.00184486	0.0438782	0.0624352	37	X	40435744	TTTGCCTCATAGTGAATTCCCACAGGAGATAGCATCTCTACTATCTCTCG	R				chrX:40439739-40440705	N_Shelf							40435744	40435867	NC_000023.10
cg03448548	0.120613	0.120898	0.117721	0.084961	0.121514	0.123828	0.148563	0.197015	0.218806	0.156632	0.148572	0.194531	0.00228842	0.0477197	0.0624305	37	16	33604228	AATTCCTTAGCTTCTTTCACTCTGCACAATAACTTGAGAATTTAGCCACG	F												33604228	33604351	NC_000016.9
cg13775295	0.752649	0.712682	0.752503	0.734041	0.690957	0.698055	0.799515	0.803876	0.806778	0.788208	0.742258	0.774809	0.00184452	0.0438744	0.0624263	37	9	137673894	ACCCGTGCCCTCTGCTGAAGGATCTGAGGGCTTTTGCCCTGCGGTTTCCG	R	COL5A1	NM_000093	Body					9:136812582-136814207	9:137672883-137674532	Unclassified_Cell_type_specific		137673894	137674017	NC_000009.11
cg10595785	0.797568	0.759581	0.751967	0.76575	0.775314	0.765083	0.840721	0.852281	0.840421	0.81538	0.83008	0.810922	4.85e-05	0.0122357	0.0624237	37	6	64237585	TATGTGAAAGAGCCCTTTTCGAATTCCAGAAACATCACTGTCTCATTACG	F							TRUE				TRUE	64237585	64237708	NC_000006.11
cg05667107	0.6591	0.634895	0.694736	0.629595	0.65715	0.692411	0.749099	0.720144	0.72467	0.711093	0.694265	0.743121	0.00149639	0.0404436	0.0624175	37	6	18280398	CGGTCCTTTGTGAGTGAGTAAGGGTGGTAGATCCAGTTTTGGCAACCTCA	F				chr6:18277417-18278062	S_Shelf	RDMR						18280398	18280521	NC_000006.11
cg12416053	0.852314	0.832292	0.835849	0.818227	0.87011	0.834482	0.850728	0.912017	0.916738	0.934705	0.903007	0.90048	0.00161385	0.0416158	0.0624002	37	3	77522398	CGTGCCGACCAGGTACAGAACTCATCCGCATAATAAAAGGTTGGGATGGG	R	ROBO2;ROBO2	NM_001128929;NM_002942	Body;Body					3:77604920-77605089				77522398	77522521	NC_000003.11
cg16177445	0.776605	0.791241	0.75984	0.768116	0.755273	0.727504	0.823375	0.810973	0.847632	0.843138	0.823693	0.8041	0.000299203	0.022705	0.0623887	37	3	65469946	CATTCCTCTTTTGCAGATGACAAACATAAAGGCCCAAAGTGGCAGAAACG	R	MAGI1;MAGI1;MAGI1	NM_015520;NM_001033057;NM_004742	Body;Body;Body				TRUE					65469946	65470069	NC_000003.11
cg27006169	0.145439	0.0859935	0.113086	0.093293	0.12588	0.131333	0.194233	0.157384	0.13577	0.20232	0.20387	0.175757	0.00171482	0.0426342	0.0623849	37	4	85612912	CGTATGTACAGATAAAGGTATTCTTGCGGTGGAACAGAATAAGGTTCTTA	R	WDFY3	NM_014991	Body				TRUE				TRUE	85612912	85613035	NC_000004.11
cg12977942	0.13495	0.199318	0.203535	0.157404	0.180353	0.185544	0.22075	0.254443	0.229678	0.250585	0.262814	0.2169	0.00107	0.0357288	0.0623444	37	5	92839308	GTCCCAGAACTAATAAGAGAGGTCACTGTGCCTAAACAGTTTGTACAACG	R	FLJ42709;FLJ42709	NR_021491;NR_015369	Body;Body				TRUE					92839308	92839431	NC_000005.9
cg21150675	0.634357	0.678748	0.634414	0.681843	0.691047	0.652649	0.685402	0.719833	0.723198	0.745184	0.762721	0.71032	0.00202259	0.0453885	0.0622664	37	3	54704963	CGGCATGTGAGATGAAAGCCAAGTTAATATGGAAATTATTATTAATAATC	F	CACNA2D3	NM_018398	Body				TRUE					54704963	54705086	NC_000003.11
cg17526441	0.789668	0.768693	0.745277	0.790235	0.773401	0.761318	0.82939	0.825813	0.823038	0.833391	0.841724	0.848626	6.06e-05	0.0131068	0.0622316	37	5	4856273	GCAAATTACTCTTTCCTACTCACCCACTTTAAGGTTGCATTGCTGCTCCG	F							TRUE					4856273	4856396	NC_000005.9
cg04945626	0.751371	0.775003	0.760705	0.760967	0.750036	0.771578	0.771382	0.82607	0.830216	0.858741	0.83987	0.816287	0.00252268	0.0495249	0.062151	37	4	3682627	CGGAGGAGACTGGAATCCAGCTAGGCTATAGTTCACAATGATGCATGCGT	R				chr4:3685222-3685539	N_Shelf			4:3652323-3652461				3682627	3682750	NC_000004.11
cg09236600	0.440095	0.378729	0.420682	0.36399	0.39251	0.42136	0.474808	0.45606	0.431149	0.462833	0.469757	0.495649	0.00217455	0.0467445	0.0621483	37	6	109504697	CGGTATGCTAAATGTAGGCAGTCAAAATTAAGAAAACACATTCAAATGCG	F							TRUE					109504697	109504820	NC_000006.11
cg17412974	0.619722	0.557524	0.544607	0.53717	0.563504	0.560001	0.641998	0.623038	0.623948	0.623591	0.592085	0.650152	0.00208667	0.0459435	0.0620472	37	12	80496965	TGCTGACCTTCGTAGTGTCCTCGTACAACCTGAACTTCATCGTCCTTTCG	R								12:79021088-79021218				80496965	80497088	NC_000012.11
cg16720005	0.518473	0.482957	0.500825	0.509382	0.511252	0.51775	0.557128	0.535506	0.554095	0.58258	0.616481	0.566507	0.00167345	0.0422367	0.0619431	37	15	27214606	CGCCTGAGTGTGCTGCAAGAATGCTGCAAGTAGAAACAATTCTTTTGTGT	R				chr15:27215951-27216856	N_Shore							27214606	27214729	NC_000015.9
cg22921692	0.685853	0.661197	0.674704	0.649416	0.685725	0.714269	0.782635	0.741503	0.722432	0.713719	0.744971	0.737459	0.000961475	0.0344138	0.0619259	37	19	9930722	AAATGTGTGTGTGCAATGGCTGCACACAGCAGCTTCCTTGGTAGTGTACG	R	FBXL12	NM_017703	TSS1500	chr19:9929166-9930494	S_Shore							9930722	9930845	NC_000019.9
cg12221689	0.193918	0.209171	0.236133	0.184245	0.189373	0.187277	0.286471	0.275548	0.274603	0.25785	0.256829	0.220252	0.000620603	0.0292629	0.0619058	37	2	98827983	CGTGAGTGTGGTATCCTTAGCAATCTAACAATGTACATGTGGGCATATCT	R	VWA3B	NM_144992	Body									98827983	98828106	NC_000002.11
cg10157972	0.727029	0.716919	0.706474	0.694211	0.6973	0.723216	0.774939	0.773392	0.796687	0.753329	0.780706	0.757	3.22e-05	0.0111425	0.0618174	37	7	143270135	CGGCTGAGCTTTTCTTCCACTCTAGAAAGCTTCTCTTCTTCCTCTATTCG	F	LOC441294	NM_001008747	1stExon									143270135	143270258	NC_000007.13
cg00785877	0.359616	0.378561	0.349232	0.332842	0.356643	0.350212	0.386521	0.403852	0.391527	0.44746	0.449219	0.419401	0.00135736	0.0390731	0.0618125	37	X	110513957	CGGTTTCAAGGAGAAATAAGACTTTCAGCGAGGATTCTGATAGATTTCTT	F	CAPN6	NM_014289	TSS200									110513957	110514080	NC_000023.10
cg09721961	0.137709	0.129684	0.125771	0.109608	0.125601	0.103683	0.193128	0.20426	0.197534	0.130727	0.197278	0.179978	0.00144219	0.0399824	0.0618082	37	4	58235517	GCAGTGGTCCTGGCCATGCCAGAATGACCTACCCTATGATTAGAGGGTCG	R							TRUE					58235517	58235640	NC_000004.11
cg21196724	0.58723	0.543722	0.577964	0.548427	0.589321	0.574773	0.645697	0.626066	0.644631	0.620256	0.623627	0.631994	0.000158328	0.0180427	0.0618056	37	5	178950855	GATGGGGAGTGTCAGGAGGCACTCTATAAATGAGAAAACGCTGCCCACCG	R												178950855	178950978	NC_000005.9
cg06734812	0.702762	0.683217	0.68356	0.684283	0.669118	0.687167	0.759196	0.731047	0.789318	0.721319	0.720144	0.759493	0.00164831	0.0419947	0.0617351	37	19	3223915	CGACAGCACAGGAGAAATGGTAAAAGTATCTTCCAGTTCTATAGGGTGCT	R	BRUNOL5	NM_021938	TSS1500	chr19:3224743-3225007	N_Shore							3223915	3224038	NC_000019.9
cg02312541	0.832123	0.807059	0.782592	0.811263	0.802761	0.816337	0.85413	0.903489	0.845627	0.878646	0.876592	0.863937	0.000224364	0.0203561	0.0617143	37	5	78912297	CAACACGGTAAAACCCCATCTCTACAACAAATACAAAATTAGGCTGCACG	F	PAPD4;PAPD4;PAPD4	NM_001114393;NM_001114394;NM_173797	5'UTR;5'UTR;5'UTR	chr5:78908219-78908691	S_Shelf							78912297	78912420	NC_000005.9
cg14226212	0.668339	0.611413	0.625746	0.644979	0.644607	0.655644	0.700857	0.684972	0.713964	0.696327	0.711616	0.713235	0.000213983	0.0201445	0.061707	37	9	113530240	CGGCCTGGAATGAACTGAAAGTAGTGAGCCCAGTCTGCCGGCCAGCTGCT	F	MUSK;MUSK;MUSK	NM_001166281;NM_001166280;NM_005592	Body;Body;Body				TRUE					113530240	113530363	NC_000009.11
cg16035199	0.804458	0.834954	0.789122	0.78274	0.769104	0.791337	0.85148	0.840575	0.820109	0.872721	0.899721	0.856962	0.00180387	0.0435103	0.0616421	37	19	464360	CGGAGGTGACGCCAGGCCCTGGGGCCTACAGCCCAGAGAAGGTGCCCCCT	R	ODF3L2	NM_182577	Body	chr19:463853-464103	S_Shore							464360	464483	NC_000019.9
cg13681142	0.721824	0.687335	0.734051	0.726712	0.722798	0.720672	0.776784	0.756358	0.828764	0.790648	0.771487	0.759088	0.00119856	0.0373003	0.0616228	37	20	42836747	ATTTGAAGCAAAAGGTTCACTTCACCTCTTTATTTCTAAGCCTTTACCCG	R	C20orf111	NM_016470	5'UTR	chr20:42839134-42839883	N_Shelf							42836747	42836870	NC_000020.10
cg06340382	0.74213	0.739244	0.723513	0.722013	0.728196	0.753896	0.814456	0.829593	0.770509	0.76196	0.803331	0.798581	0.00107299	0.035772	0.0615729	37	3	152464125	CGGGGTGATTTAGGGTCATTTGAAGAGTCCTGAGATTCCACCTGGCCCTA	R							TRUE					152464125	152464248	NC_000003.11
cg10586546	0.200637	0.195074	0.225891	0.220505	0.174537	0.232715	0.255668	0.277747	0.299286	0.266777	0.237723	0.281159	0.000625212	0.0293359	0.0615002	37	6	31634657	CGGAGCCCACAGAACCAGGAAATCCAGGACACCTCCTCTGAGCTGCTCAT	R	BAT4;CSNK2B	NM_033177;NM_001320	TSS1500;Body	chr6:31632815-31634093	S_Shore	RDMR						31634657	31634780	NC_000006.11
cg24841257	0.158153	0.0992343	0.145279	0.115934	0.111864	0.122941	0.198448	0.182205	0.215331	0.148705	0.166758	0.210803	0.00140457	0.0396149	0.0614743	37	1	99126704	GAAAATAGTTTGTAAAGCTCAGCTTTCCTGGCTCGACAGTGAAATGACCG	R	SNX7;SNX7	NM_015976;NM_152238	TSS1500;TSS1500	chr1:99126872-99127711	N_Shore				1:99126334-99126803	Unclassified_Cell_type_specific	TRUE	99126704	99126827	NC_000001.10
cg18741439	0.74006	0.790721	0.760025	0.763192	0.801614	0.733795	0.806872	0.809684	0.82286	0.837185	0.871092	0.81052	0.00209828	0.046008	0.0614676	37	8	19310134	CGCCTACCAGTCAGAGGAAAAAGGAAAGTTTTGGCTCTGTTTCTATCGCT	R	CSGALNACT1;CSGALNACT1;CSGALNACT1	NM_018371;NM_001130518;NR_024040	Body;Body;Body				TRUE					19310134	19310257	NC_000008.10
cg01893797	0.234117	0.31007	0.262606	0.262115	0.297062	0.299753	0.318687	0.327839	0.330116	0.362513	0.343519	0.351786	0.00212386	0.0462414	0.061456	37	X	2984739	CGGGAACCATCTGGGTGAGCCTAGCAGGGACCAGCCCTCCCATGGGAGAG	F	ARSF	NM_004042	TSS200									2984739	2984862	NC_000023.10
cg16308148	0.765338	0.743828	0.749272	0.729717	0.735671	0.752442	0.82656	0.80177	0.808901	0.825102	0.797176	0.785462	3.33e-05	0.0112608	0.0614505	37	7	34696454	TGTACACCCGTTTCCCTTCAATCTTGTCAGCACTTGGGGATAGCCACACG	R	NPSR1;NPSR1	NM_207173;NM_207172	TSS1500;TSS1500									34696454	34696577	NC_000007.13
cg27202075	0.745449	0.786264	0.808172	0.78991	0.784601	0.752888	0.867947	0.838746	0.850957	0.800466	0.861797	0.815993	0.00182335	0.0436785	0.0614371	37	3	73559509	CGGGTAGAGATCTAGAAATGGAGCCACCAGTTTCCAGGCAAGACCAGACG	R	PDZRN3	NM_015009	Body				TRUE					73559509	73559632	NC_000003.11
cg27490043	0.785767	0.755278	0.749812	0.722248	0.756332	0.764748	0.818845	0.787737	0.84697	0.80409	0.853547	0.791569	0.001812	0.0435769	0.061429	37	7	71086708	GCATCAAATAGGGTTCCATTTCTACCCTAGAATGTTATAATTTTATCACG	F	WBSCR17	NM_022479	Body				TRUE					71086708	71086831	NC_000007.13
cg08371064	0.795685	0.814062	0.80205	0.783856	0.830387	0.799092	0.852756	0.883009	0.895069	0.86906	0.858053	0.835568	0.00029987	0.0227266	0.0613972	37	17	80980910	CGGCCCACCTGCACCAGCGTGAACTCACATTAGCTTAGCACTGTCCCCGG	F	B3GNTL1	NM_001009905	Body	chr17:80983038-80983563	N_Shelf			17:78573511-78574529				80980910	80981033	NC_000017.10
cg11808936	0.331215	0.362249	0.351656	0.373842	0.401741	0.366665	0.40678	0.450541	0.412533	0.464263	0.421633	0.399802	0.00156619	0.0411179	0.0613639	37	4	7894203	CGGGGAGGTGGGAATCATTGGACCTGCATGCTGCCAGCTGTGAGATGCCA	F	AFAP1;AFAP1	NM_198595;NM_001134647	5'UTR;5'UTR				TRUE		4:7894203-7895895	Unclassified_Cell_type_specific	TRUE	7894203	7894326	NC_000004.11
cg04279139	0.0952744	0.0663174	0.0903972	0.0641722	0.0599376	0.0737898	0.15324	0.150877	0.16909	0.0871909	0.121482	0.136158	0.00208886	0.0459513	0.0613582	37	12	27925367	AATGACTCATTCACCTTCTTGACACAAAAATCATCAGCATTCTTTGAACG	R	LOC100133893	NM_001146221	TSS1500				TRUE					27925367	27925490	NC_000012.11
cg10756457	0.594534	0.608004	0.658201	0.606696	0.588952	0.642897	0.714148	0.656639	0.672719	0.653466	0.694799	0.67559	0.00208748	0.0459446	0.061346	37	2	51252301	CGTAGAAGGAAAACAAAAGATTGGATTCTTTTGAGTATCACAGAATTGGG	R	NRXN1;NRXN1	NM_004801;NM_001135659	Body;Body	chr2:51254522-51255498	N_Shelf		TRUE					51252301	51252424	NC_000002.11
cg20238197	0.688957	0.669809	0.727943	0.707144	0.704157	0.717063	0.736847	0.736391	0.798719	0.741206	0.777703	0.792273	0.00222955	0.0472511	0.0613444	37	7	110511335	TTGATCCTGTGTTTTTAAGTGCTGTCTTCATGCATCAGTGCTCAGATTCG	F	IMMP2L	NM_032549	Body				TRUE					110511335	110511458	NC_000007.13
cg15888522	0.772888	0.813562	0.772045	0.80446	0.799699	0.779871	0.881257	0.837187	0.83345	0.833359	0.862635	0.862659	0.00023161	0.0206124	0.061337	37	3	46068932	CGCATGTAAAGAGGTGTAGATTCAGGTGAGTTCCTTTACAAACATTTTAA	R	XCR1;XCR1;XCR1;XCR1	NM_005283;NM_001024644;NM_005283;NM_001024644	5'UTR;1stExon;1stExon;5'UTR									46068932	46069055	NC_000003.11
cg17391518	0.737812	0.733416	0.717344	0.732093	0.748652	0.767637	0.782084	0.82277	0.763999	0.798739	0.806417	0.830952	0.000829353	0.0326764	0.0613347	37	19	59028285	GGCACCACTGTAGTCAGCGAGGCCAGTGGGTGCAGGGGGCTCCTCGCACG	R	ZBTB45	NM_032792	Body	chr19:59028055-59028288	Island			19:63719826-63720735	19:59028080-59029129	Unclassified_Cell_type_specific	TRUE	59028285	59028408	NC_000019.9
cg10794502	0.759322	0.772275	0.760968	0.743897	0.748514	0.759312	0.795513	0.785774	0.860812	0.840931	0.81628	0.81277	0.00207843	0.04586	0.0612988	37	14	57773374	CGGGGCTTGATGAGAGTAGAGCCAAAATGTGAACACAGGGCAGCCTGTCT	F							TRUE					57773374	57773497	NC_000014.8
cg05708512	0.739254	0.753098	0.73241	0.705049	0.701468	0.754422	0.79953	0.765309	0.814814	0.796022	0.821596	0.756202	0.00164262	0.0419115	0.0612952	37	5	31731391	CGCTGGGTACCATGGTTGCCTGGTAAATATGGGAGCCCTATCATTCTGGG	R							TRUE					31731391	31731514	NC_000005.9
cg09773473	0.786109	0.767013	0.787169	0.78398	0.802819	0.794034	0.842182	0.863482	0.834048	0.846043	0.848391	0.854627	2.8e-06	0.00509438	0.0612749	37	7	36700939	TCCTGCAGACTGGCTTTCCAGATACTCAGTCCACCTGGCAGGAAATTACG	F	AOAH	NM_001637	Body									36700939	36701062	NC_000007.13
cg07974833	0.797983	0.776761	0.806256	0.777962	0.811792	0.79509	0.852066	0.871746	0.884597	0.827988	0.847646	0.849352	0.000168372	0.0184209	0.0612586	37	4	73430160	TCCTACCAAGGCAATACTCTGAGTCAGAAATGACAGTGCTCCCTGATACG	R	ADAMTS3	NM_014243	Body	chr4:73433783-73434289	N_Shelf							73430160	73430283	NC_000004.11
cg23051091	0.724125	0.71868	0.707006	0.730317	0.707774	0.687565	0.812273	0.735379	0.756086	0.768905	0.763987	0.80587	0.00243105	0.0488178	0.0611722	37	8	122001888	GCTTGCACAGTAGATACATGTCTTATGATTCAATCCACAGCTAGACTACG	F							TRUE					122001888	122002011	NC_000008.10
cg04730254	0.843713	0.786141	0.761348	0.780675	0.784629	0.81213	0.891176	0.82684	0.845897	0.849603	0.861238	0.860862	0.00231814	0.0479716	0.0611633	37	16	89215465	CGGAACTTAGATTTAAAAGGTAAGCAGAGCATAAAATTTGGAAAATTTGC	R	ACSF3;ACSF3;ACSF3	NM_174917;NR_023316;NM_001127214	Body;Body;Body	chr16:89219333-89219651	N_Shelf							89215465	89215588	NC_000016.9
cg21057473	0.681175	0.678508	0.699072	0.684675	0.690761	0.691768	0.734251	0.757186	0.747468	0.744607	0.745833	0.763539	7.59e-07	0.00349917	0.0611542	37	11	5346163	AGGCATGCAGCCTCAGATTCTGCCCCTTCCAACATTCTGAATCAAATTCG	R	OR51B2	NM_033180	TSS1500									5346163	5346286	NC_000011.9
cg13229867	0.67527	0.657208	0.672356	0.667577	0.651683	0.698085	0.721341	0.699939	0.714	0.750768	0.74633	0.756551	0.000472286	0.0267601	0.061125	37	3	151058783	CGAGTTATGGTTATTTTCTATGCAAATGATAAATCCAAGTTGAGATCAAG	F	MED12L;P2RY12;P2RY12	NM_053002;NM_176876;NM_022788	Body;TSS200;5'UTR									151058783	151058906	NC_000003.11
cg09135239	0.135719	0.196478	0.16034	0.182384	0.126124	0.186328	0.245161	0.225638	0.228565	0.241657	0.206658	0.206192	0.00198986	0.0451214	0.0610831	37	16	412393	CCCAGGATGTCCACGGGTGACGGTTGAGAAGCCTCGTCTCCAGACATACG	F				chr16:409984-411491	S_Shore			16:352133-352563	16:411843-412804	Unclassified		412393	412516	NC_000016.9
cg14875394	0.874607	0.84585	0.832711	0.843196	0.83927	0.859928	0.896363	0.912337	0.928267	0.909981	0.890291	0.924556	3.88e-05	0.0116837	0.0610386	37	3	191581259	CGGCCAGCGAAAGATCTAGACCCAGCAGTTAGACGGCCAGCGAAAGACCT	F				chr3:191580928-191581300	Island			3:193063623-193063961				191581259	191581382	NC_000003.11
cg24656207	0.667574	0.637753	0.660467	0.669608	0.7095	0.689481	0.737392	0.71753	0.758276	0.717507	0.698718	0.770829	0.00235675	0.0482325	0.0609782	37	11	36030086	TCTTTCTCACCCCATAGGACTGGAACACCCAAAGAATTGCCTGTGTATCG	F	LDLRAD3	NM_174902	Body				TRUE					36030086	36030209	NC_000011.9
cg21487363	0.711886	0.702936	0.713674	0.738952	0.698194	0.693825	0.79767	0.762819	0.783923	0.741847	0.742283	0.796746	0.000984303	0.0347571	0.0609704	37	3	71537887	CGGGAGCCCGAGTGATACAATCTGATAGGCAGCTGCCAGCACTCATAACT	F	FOXP1;FOXP1	NM_032682;NM_001012505	5'UTR;5'UTR				TRUE					71537887	71538010	NC_000003.11
cg01743846	0.520583	0.492149	0.503274	0.535322	0.523347	0.497835	0.56197	0.614335	0.576084	0.530791	0.571897	0.58289	0.00146991	0.0402136	0.0609097	37	9	127176827	AGCACTATAGAGTTCAAAGGTGAGACAGACCTGTCTGACCCCAAATCTCG	R	PSMB7	NM_002799	Body	chr9:127177366-127177818	N_Shore							127176827	127176950	NC_000009.11
cg06729555	0.719075	0.697123	0.6919	0.707147	0.720743	0.714427	0.7698	0.768642	0.749359	0.750005	0.768202	0.809222	0.000364883	0.0242179	0.0608024	37	3	125458042	CAAAATCACCGGGTGGTGGATGCACACCCAGTGCTATATTGGGAGTAACG	R								3:126940558-126940763				125458042	125458165	NC_000003.11
cg03617867	0.711902	0.732447	0.743124	0.757503	0.769001	0.757401	0.798329	0.791526	0.787543	0.805256	0.845203	0.808114	0.000478157	0.0268966	0.060765	37	6	155053338	CGGTGGAGAAATCTGTGACAGAATTTGAGATTTTGAAAGTAAATATAAAA	F	RBM16	NM_014892	TSS1500	chr6:155054186-155055403	N_Shore							155053338	155053461	NC_000006.11
cg17002156	0.66802	0.635323	0.644798	0.678401	0.625583	0.662536	0.708059	0.709645	0.70198	0.728042	0.722727	0.708796	0.000277092	0.0220986	0.0607648	37	1	183995878	CGGGAAAAATCTAAGAAAATTAAATACAAGAAACAAAGAAACCAAGATTA	F	GLT25D2	NM_015101	Body				TRUE					183995878	183996001	NC_000001.10
cg03877767	0.721319	0.709664	0.722902	0.756767	0.736183	0.729347	0.817231	0.793832	0.815682	0.772555	0.769151	0.772145	0.000404941	0.0252607	0.0607356	37	2	11680057	GAAGAGGATGCGTGGGGCGCGTAATGCCCTGCTGTGCAGAGCCTGGCTCG	F	GREB1;GREB1	NM_014668;NM_148903	5'UTR;TSS200									11680057	11680180	NC_000002.11
cg03671266	0.689554	0.722159	0.706633	0.701257	0.729098	0.708813	0.748785	0.773917	0.780617	0.749947	0.788755	0.779782	5.95e-05	0.0130322	0.0607147	37	16	989969	CGAGGTGAGGGCGTCCTGGACTATGTGATCACAGACGTCCTCATCAGAGA	F	LMF1	NM_022773	Body					16:929970-930314				989969	990092	NC_000016.9
cg02405517	0.288826	0.320915	0.301266	0.308417	0.322502	0.301894	0.355084	0.344298	0.369222	0.396014	0.371174	0.372155	7.01e-05	0.0137913	0.0606878	37	19	7984832	CGGCAAGGCTAAATCACTTGCCCAAAGTCCCCAGGCCTGTCTGACCCCAG	F	SNAPC2;SNAPC2	NR_030717;NM_003083	TSS1500;TSS1500	chr19:7985065-7985390	N_Shore				19:7984526-7986332	Promoter_Associated		7984832	7984955	NC_000019.9
[truncated: 23,869 more rows]
