# Supplementary material for: Angiogenic Transformation in Human Brain Micro Endothelial Cells: Whole Genome DNA Methylation and Transcriptomic Analysis
Source: Front Physiol. 2019 Dec 11;10:1502. doi: 10.3389/fphys.2019.01502 (PMC6917667; doi:10.3389/fphys.2019.01502)
Supplement: TABLE S5 — Enlists genes with change in CpG methylation in promoter region with correlated change in mRNA levels. [file Table_5.XLSX]

## Sheet: File_ctrl_vs_TF_p05__25184
Supplemental Table S6: Enlists genes with change in CpG methylation in promoter region wih correlated change in mRNA levels.
Gene Symbol	Gene Name	Primary Accession	Illumina id	Genome_Build	CHR	MAPINFO	Strand	UCSC_RefGene_Group	Methylation Fold Change TF / Control	Methylation P-Value	Gene Expression Fold Change TF / Control	Gene Expression P Value
MYBL1	v-myb avian myeloblastosis viral oncogene homolog-like 1	NM_001080416	cg00021237	37	8	67525849	F	TSS1500	-15.2743	0.000683947	2.022	1.14e-05
CAMSAP1	calmodulin regulated spectrin-associated protein 1	NM_015447	cg00022024	37	9	138800324	F	TSS1500	-12.2147	1.22e-06	2.23	0.00812
HOXC9	homeobox C9	NM_006897	cg02568274	37	12	54393565	F	TSS1500	-25.4097	0.000569521	4.039	1.11e-05
KIF22	kinesin family member 22	NM_007317	cg03462115	37	16	29801729	F	TSS1500	-63.597	0.000124969	2.362	0.000141
ANKRD10	ankyrin repeat domain 10	NM_001286721	cg03859684	37	13	111568271	F	TSS1500	-110.976	0.00143672	3.082	3.28e-07
CHSY3	chondroitin sulfate synthase 3	NM_175856	cg04729562	37	5	129239837	R	TSS1500	-103.105	0.000697932	5.578	0.00105
NIP7	NIP7, nucleolar pre-rRNA processing protein	NM_016101	cg05614267	37	16	69373129	R	TSS1500	-40.3227	0.00113858	2.082	1.87e-05
BAMBI	BMP and activin membrane-bound inhibitor	NM_012342	cg05750029	37	10	28965858	R	TSS1500	-36.2887	0.00099935	4.561	1.82e-06
BIRC2	baculoviral IAP repeat containing 2	NM_001166	cg06276114	37	11	102217591	R	TSS1500	-50.5354	5.14e-05	2.485	0.00916
TWIST2	twist family bHLH transcription factor 2	NM_057179	cg06738242	37	2	239755703	F	TSS1500	-13.3135	0.000330649	4.352	0.000136
CBFB	core-binding factor, beta subunit	NM_001755	cg06766367	37	16	67062687	R	TSS1500	-22.8362	0.00179603	3.178	0.000224
PTGES3	prostaglandin E synthase 3 (cytosolic)	NM_006601	cg07281688	37	12	57082442	F	TSS1500	-37.091	0.00145717	3.289	0.00344
NPPC	natriuretic peptide C	NM_024409	cg07797231	37	2	232791732	F	TSS1500	-14.5151	7.51e-05	13.89	7.23e-09
CLK1	CDC-like kinase 1	NM_001162407	cg08400563	37	2	201729555	F	TSS1500	-45.8596	0.00189347	2.631	0.0163
NUPL1	nucleoporin like 1	ENST00000463407	cg08532057	37	13	25875436	F	TSS1500	-21.4231	0.00156345	4.28	3.9e-07
SLC6A6	solute carrier family 6 (neurotransmitter transporter), member 6	NM_003043	cg08926287	37	3	14443694	F	TSS1500	-21.1187	0.0002493	2.122	7.14e-05
TMEM97	transmembrane protein 97	NM_014573	cg10342447	37	17	26645325	F	TSS1500	-17.7554	0.000627284	2.997	3.69e-10
WTIP	Wilms tumor 1 interacting protein	NM_001080436	cg10771931	37	19	34972145	R	TSS1500	-14.733	8.28e-05	2.381	2.65e-05
KCNK1	potassium channel, subfamily K, member 1	NM_002245	cg11382055	37	1	233749410	R	TSS1500	-44.1337	0.000828993	7.105	6.8e-07
NUF2	NUF2, NDC80 kinetochore complex component	NM_145697	cg11823214	37	1	163291487	R	TSS1500	-46.2009	0.00177191	4.364	5.56e-08
TNFRSF11B	tumor necrosis factor receptor superfamily, member 11b	NM_002546	cg12545993	37	8	119964636	F	TSS1500	-22.306	0.000480007	2.056	0.00589
TTC28	tetratricopeptide repeat domain 28	NM_001145418	cg12565055	37	22	29076175	R	TSS1500	-27.7665	0.00211271	2.392	0.00446
HLX	H2.0-like homeobox	NM_021958	cg13170032	37	1	221052143	R	TSS1500	-10.0126	0.000254465	3.898	1.81e-08
KIAA1324	KIAA1324	NM_020775	cg13932362	37	1	109656277	R	TSS1500	-282.787	0.00208365	2.202	9.12e-07
FLT1	fms-related tyrosine kinase 1	NM_001160031	cg14283783	37	13	29069941	R	TSS1500	-17.2932	0.000918536	12.16	1.09e-08
POLA1	polymerase (DNA directed), alpha 1, catalytic subunit	NM_016937	cg14520892	37	X	24711633	R	TSS1500	-11.1142	0.00102796	2.12	1.93e-06
MAP2K3	mitogen-activated protein kinase kinase 3	NM_145109	cg14636712	37	17	21187553	R	TSS1500	-63.6602	0.0025001	2.89	4.85e-09
SUSD4	sushi domain containing 4	ENST00000366877	cg15100599	37	1	223538174	R	TSS1500	-18.3185	0.0016707	2.074	0.018
DLEU1	deleted in lymphocytic leukemia 1 (non-protein coding)	NR_002605	cg17004212	37	13	50656130	R	TSS1500	-14.9576	0.000944999	2.519	1.04e-06
ZMYM5	zinc finger, MYM-type 5	NM_001039650	cg19404184	37	13	20438655	F	TSS1500	-22.4188	1.68e-05	2.215	3.51e-06
ERRFI1	ERBB receptor feedback inhibitor 1	NM_018948	cg19560758	37	1	8086721	F	TSS1500	-16.2666	0.000140133	4.034	0.000123
CYCS	cytochrome c, somatic	NM_018947	cg19892210	37	7	25165235	F	TSS1500	-122.148	0.00117752	3.194	0.000813
PPP1R3C	protein phosphatase 1, regulatory subunit 3C	NM_005398	cg19902394	37	10	93393086	R	TSS1500	-13.4622	0.000150804	9.524	8.27e-06
RYBP	RING1 and YY1 binding protein	NM_012234	cg22685502	37	3	72496851	F	TSS1500	-20.0233	0.000224842	2.65	0.0148
PAICS	phosphoribosylaminoimidazole carboxylase, phosphoribosylaminoimidazole succinocarboxamide synthetase	NM_001079525	cg22805500	37	4	57301680	F	TSS1500	-14.797	0.000400483	2.06	6.03e-07
MYBL2	v-myb avian myeloblastosis viral oncogene homolog-like 2	NM_002466	cg23843505	37	20	42295420	R	TSS1500	-22.0942	0.00204114	4.039	1.89e-09
ATOH8	atonal homolog 8 (Drosophila)	NM_032827	cg24399924	37	2	85980533	R	TSS1500	-11.6702	0.000535424	47.43	9.9e-10
GFI1	growth factor independent 1 transcription repressor	NM_005263	cg24683414	37	1	92952581	F	TSS1500	-16.2114	0.00122066	6.863	3.81e-06
SPATA2	spermatogenesis associated 2	NM_006038	cg25188239	37	20	48532311	R	TSS1500	-19.0619	2.17e-05	2.158	0.0442
TAPT1	transmembrane anterior posterior transformation 1	NM_153365	cg25940730	37	4	16228647	F	TSS1500	-16.718	0.00109781	2.177	0.000636
ACP5	acid phosphatase 5, tartrate resistant	NM_001611	cg27002699	37	19	11689538	R	TSS1500	-23.5222	5.62e-05	6.249	5.77e-06
GNA13	guanine nucleotide binding protein (G protein), alpha 13	NM_006572	cg27490352	37	17	63053354	R	TSS1500	-89.4871	0.00188705	3.148	7.38e-06
CMTM8	CKLF-like MARVEL transmembrane domain containing 8	NM_178868	cg01617750	37	3	32279261	R	TSS1500	-14.9125	9.01e-06	3.631	0.000952
BNIP3L	BCL2/adenovirus E1B 19kDa interacting protein 3-like	AF370457	cg01706566	37	8	26239922	R	TSS1500	14.5726	0.000271253	0.358	7.86e-08
MAFK	v-maf avian musculoaponeurotic fibrosarcoma oncogene homolog K	NM_002360	cg01784819	37	7	1569242	F	TSS1500	-15.4398	4.98e-06	2.051	1.47e-05
CHMP1B	charged multivesicular body protein 1B	NM_020412	cg02755938	37	18	11850146	F	TSS1500	-16.226	0.000778694	2.415	1.99e-06
PRRC1	proline-rich coiled-coil 1	NM_130809	cg02762363	37	5	126852998	R	TSS1500	-20.2241	0.00106688	2.064	0.0446
FAM64A	family with sequence similarity 64, member A	NM_001195228	cg03736603	37	17	6346862	F	TSS1500	-25.1341	0.00038392	3.617	0.00446
LGR6	leucine-rich repeat containing G protein-coupled receptor 6	NM_001017403	cg04343883	37	1	202162338	F	TSS1500	-22.187	0.000780464	2.153	0.000413
DDX3Y	DEAD (Asp-Glu-Ala-Asp) box helicase 3, Y-linked	NM_001122665	cg05128824	37	Y	15015176	F	TSS1500	-8.83353	6.96e-06	2.792	3.21e-06
ZNF655	zinc finger protein 655	NM_024061	cg05165378	37	7	99155739	F	TSS1500	-14.7701	0.00181853	2.128	1.67e-06
CLCN6	chloride channel, voltage-sensitive 6	NM_001286	cg05228408	37	1	11865352	R	TSS1500	-22.2304	0.000490917	2.156	0.000198
KIFC1	kinesin family member C1	NM_002263	cg05982236	37	6	33358419	F	TSS1500	-56.2218	0.00173898	4.092	2.61e-05
KCTD5	potassium channel tetramerization domain containing 5	NM_018992	cg06057750	37	16	2731600	F	TSS1500	-7.05109	4.03e-05	2.054	4.59e-05
CRIP1	cysteine-rich protein 1 (intestinal)	NM_001311	cg06618474	37	14	105952171	R	TSS1500	-14.6065	0.000959846	2.431	3.15e-05
ST8SIA2	ST8 alpha-N-acetyl-neuraminide alpha-2,8-sialyltransferase 2	NM_006011	cg06675273	37	15	92936465	R	TSS1500	26.9999	0.00136071	0.433	4.21e-05
RELB	v-rel avian reticuloendotheliosis viral oncogene homolog B	NM_006509	cg06716283	37	19	45504390	F	TSS1500	-15.4557	0.00257246	2.229	0.00171
SPATS2L	spermatogenesis associated, serine-rich 2-like	NM_001282735	cg06905367	37	2	201170384	F	TSS1500	-17.6869	0.000721232	2.363	6.73e-07
DHDH	dihydrodiol dehydrogenase (dimeric)	NM_014475	cg07134608	37	19	49436579	F	TSS1500	-23.0791	0.000975327	2.011	0.00525
C15orf39	chromosome 15 open reading frame 39	NM_015492	cg07158808	37	15	75493819	R	TSS1500	-85.1948	0.000766668	3.231	0.000309
ARL13B	ADP-ribosylation factor-like 13B	NM_182896	cg07204803	37	3	93698231	F	TSS1500	-10.7359	0.00108447	2.649	0.0147
SGK3	serum/glucocorticoid regulated kinase family, member 3	NM_013257	cg07554251	37	8	67686871	F	TSS1500	-22.2327	7.57e-05	2.378	0.000275
TTK	TTK protein kinase	NM_003318	cg08044663	37	6	80713582	F	TSS1500	-18.798	0.000996989	4.694	9.04e-06
ZNF586	zinc finger protein 586	NM_017652	cg08140458	37	19	58280728	F	TSS1500	-13.4113	0.0010666	2.404	0.00198
CA13	carbonic anhydrase XIII	NM_198584	cg08508368	37	8	86157364	F	TSS1500	-18.056	0.00216091	3.487	2.54e-05
CNP	2',3'-cyclic nucleotide 3' phosphodiesterase	ENST00000592861	cg08539620	37	17	40118030	F	TSS1500	-13.024	0.000285113	2.663	0.00103
CENPA	centromere protein A	NM_001809	cg10315993	37	2	27008359	F	TSS1500	-21.3143	0.000139044	4.795	4.28e-05
ACADM	acyl-CoA dehydrogenase, C-4 to C-12 straight chain	NM_000016	cg10523679	37	1	76189770	R	TSS1500	-16.4224	0.00185605	2.844	0.0322
ZFY	zinc finger protein, Y-linked	NM_003411	cg10557773	37	Y	2801877	R	TSS1500	-6.07633	0.00243281	2.816	0.000746
PRDM2	PR domain containing 2, with ZNF domain	NM_015866	cg11344626	37	1	14026360	F	TSS1500	-9.69208	0.00125494	2.046	1.04e-05
MIS12	MIS12 kinetochore complex component	NM_024039	cg11488514	37	17	5389158	F	TSS1500	-43.3069	0.00237944	2.494	4.84e-06
ENTPD7	ectonucleoside triphosphate diphosphohydrolase 7	NM_020354	cg11736228	37	10	101418244	F	TSS1500	-24.9195	0.00116362	4.261	1.56e-07
PPAPDC1A	phosphatidic acid phosphatase type 2 domain containing 1A	NM_001030059	cg12011977	37	10	122215735	F	TSS1500	-12.5526	0.00220772	2.237	2.59e-06
KIF2C	kinesin family member 2C	NM_006845	cg12276329	37	1	45205272	R	TSS1500	-134.119	0.000171339	4.307	7.51e-09
CACHD1	cache domain containing 1	NM_020925	cg12730853	37	1	64935328	F	TSS1500	-15.9136	0.000850813	3.023	0.000387
ARAF	v-raf murine sarcoma 3611 viral oncogene homolog	NM_001256197	cg13372830	37	X	47420231	F	TSS1500	-19.6692	0.00161416	3.071	0.00121
TMEM57	transmembrane protein 57	NM_018202	cg13795696	37	1	25755935	F	TSS1500	-22.6151	0.000246587	2.068	4.76e-07
MYLIP	myosin regulatory light chain interacting protein	NM_013262	cg14298379	37	6	16128926	F	TSS1500	-45.173	0.0013517	2.142	8.46e-08
CEBPG	CCAAT/enhancer binding protein (C/EBP), gamma	NM_001806	cg15046693	37	19	33863876	R	TSS1500	-15.9825	0.000561059	2.747	1.99e-05
SKP2	S-phase kinase-associated protein 2, E3 ubiquitin protein ligase	NM_032637	cg16113047	37	5	36151301	F	TSS1500	-57.7404	0.000670566	2.283	6.5e-05
HERPUD1	homocysteine-inducible, endoplasmic reticulum stress-inducible, ubiquitin-like domain member 1	NM_014685	cg17808849	37	16	56965376	F	TSS1500	-28.9159	0.00132202	3.485	1.95e-05
PRPF38B	pre-mRNA processing factor 38B	NM_018061	cg18384976	37	1	109234647	R	TSS1500	-70.1927	0.00113302	2.154	0.0255
MAP3K8	mitogen-activated protein kinase kinase kinase 8	ENST00000375322	cg18806716	37	10	30721971	F	TSS1500	-12.3489	0.000339933	29.42	2.52e-06
C2CD4A	C2 calcium-dependent domain containing 4A	NM_207322	cg19294311	37	15	62358920	F	TSS1500	-15.9098	2.72e-06	5.396	7.39e-05
RBBP8	retinoblastoma binding protein 8	NM_002894	cg19304407	37	18	20512860	R	TSS1500	-26.7277	0.000192179	2.668	0.000634
ZNF207	zinc finger protein 207	NM_001032293	cg19777771	37	17	30676863	R	TSS1500	-11.3706	0.00106824	2.225	6.1e-05
DYRK2	dual-specificity tyrosine-(Y)-phosphorylation regulated kinase 2	NM_006482	cg20408290	37	12	68042072	F	TSS1500	-38.7756	0.00101009	2.371	1.4e-05
DR1	down-regulator of transcription 1, TBP-binding (negative cofactor 2)	NM_001938	cg20694648	37	1	93810985	R	TSS1500	-96.5624	0.00180715	2.073	1.09e-05
TSKU	tsukushi, small leucine rich proteoglycan	NM_015516	cg20886049	37	11	76493545	R	TSS1500	-15.2958	0.00165392	2.172	0.000686
SEH1L	SEH1-like (S. cerevisiae)	NM_001013437	cg22185043	37	18	12947723	R	TSS1500	-16.328	6.85e-05	2.2	7.96e-05
MAP3K1	mitogen-activated protein kinase kinase kinase 1, E3 ubiquitin protein ligase	NM_005921	cg23094728	37	5	56110263	R	TSS1500	-14.4924	0.00142949	2.235	0.000613
CACYBP	calcyclin binding protein	NM_014412	cg24338780	37	1	174968123	F	TSS1500	-24.9017	0.000742859	2.319	0.000205
PTP4A1	protein tyrosine phosphatase type IVA, member 1	NM_003463	cg24631428	37	6	64281604	F	TSS1500	-8.87178	0.000804748	2.299	0.000427
IFRD1	interferon-related developmental regulator 1	NM_001007245	cg25387411	37	7	112090077	F	TSS1500	-52.4351	0.0016114	2.207	0.000426
FAM83D	family with sequence similarity 83, member D	NM_030919	cg26220336	37	20	37554591	F	TSS1500	-19.3878	1.67e-05	3.145	4.38e-08
SPAG1	sperm associated antigen 1	NM_003114	cg27170159	37	8	101170019	F	TSS1500	-9.10316	0.00210191	5.968	0.0014
SNORA27	small nucleolar RNA, H/ACA box 27	NR_002575	cg09363424	37	13	27829014	R	TSS1500	-7.65597	0.00190286	2.655	0.000228
UBE2S	ubiquitin-conjugating enzyme E2S	NM_014501	cg00035623	37	19	55919836	F	TSS1500	-15.2693	4.17e-05	2.546	1.47e-07
NUFIP1	nuclear fragile X mental retardation protein interacting protein 1	NM_012345	cg00313876	37	13	45564444	R	TSS1500	-23.2382	0.000210758	2.315	0.00033
HBEGF	heparin-binding EGF-like growth factor	NM_001945	cg00521255	37	5	139726689	R	TSS1500	-18.9234	0.0010619	5.11	1.67e-10
SUCLA2	succinate-CoA ligase, ADP-forming, beta subunit	NM_003850	cg01732984	37	13	48575859	F	TSS1500	-17.823	0.000245219	2.267	0.00135
SFPQ	splicing factor proline/glutamine-rich	NM_005066	cg01938422	37	1	35659480	R	TSS1500	-7.9885	3.79e-05	2.104	3.63e-08
NOL10	nucleolar protein 10	NM_024894	cg02196655	37	2	10830764	R	TSS1500	-16.1682	3.61e-05	2.078	8.62e-05
PGGT1B	protein geranylgeranyltransferase type I, beta subunit	NM_005023	cg04529658	37	5	114598980	F	TSS1500	-15.2688	0.0017502	2.612	0.00538
RSL1D1	ribosomal L1 domain containing 1	NM_015659	cg05852052	37	16	11946115	R	TSS1500	-6.80661	0.000455466	2.247	4.07e-06
DPY19L1	dpy-19-like 1 (C. elegans)	NM_015283	cg06033194	37	7	35079111	R	TSS1500	-9.33951	4.46e-05	2.057	0.00259
SERBP1	SERPINE1 mRNA binding protein 1	NM_001018067	cg06764498	37	1	67897436	F	TSS1500	-11.2547	0.00242882	2.414	0.000489
GEM	GTP binding protein overexpressed in skeletal muscle	NM_005261	cg07306755	37	8	95274853	R	TSS1500	-14.8431	1.37e-05	8.761	5.84e-10
ARGLU1	arginine and glutamate rich 1	NM_018011	cg08453322	37	13	107220725	R	TSS1500	-112.185	0.000134931	2.346	0.0218
ZNF468	zinc finger protein 468	NM_001277120	cg08531263	37	19	53361164	F	TSS1500	-15.6742	8.33e-05	3.093	0.000185
NRCAM	neuronal cell adhesion molecule	NM_001037132	cg09561125	37	7	108097477	F	TSS1500	-11.1774	9.84e-06	2.166	8.01e-05
PRKD1	protein kinase D1	NM_002742	cg10077239	37	14	30397686	R	TSS1500	-15.5088	0.00200067	3.158	1.02e-06
TIMM8A	translocase of inner mitochondrial membrane 8 homolog A (yeast)	NM_004085	cg10321928	37	X	100604176	F	TSS1500	-18.6599	0.000168187	2.304	0.00014
LRP4	low density lipoprotein receptor-related protein 4	NM_002334	cg12627354	37	11	46940434	F	TSS1500	-23.8523	0.00055495	2.469	3.9e-06
KLF9	Kruppel-like factor 9	NM_001206	cg13696409	37	9	73030641	F	TSS1500	-29.2972	0.00245874	2.384	9.12e-06
MNS1	meiosis-specific nuclear structural 1	NM_018365	cg13816802	37	15	56757552	R	TSS1500	-26.2296	0.00177558	2.86	2.75e-06
HIGD1A	HIG1 hypoxia inducible domain family, member 1A	NM_001099668	cg14508777	37	3	42847116	F	TSS1500	-17.752	0.00155636	2.007	0.0338
EIF2B3	eukaryotic translation initiation factor 2B, subunit 3 gamma, 58kDa	NM_020365	cg14611683	37	1	45452580	R	TSS1500	-17.3872	0.00126987	2.056	0.00266
CD58	CD58 molecule	NM_001779	cg17215278	37	1	117114263	R	TSS1500	-15.908	0.000616816	3.045	1.26e-05
LIN9	lin-9 homolog (C. elegans)	NM_173083	cg17985912	37	1	226497578	R	TSS1500	-22.2916	0.00167484	2.878	2.51e-06
ELK4	ELK4, ETS-domain protein (SRF accessory protein 1)	NM_001973	cg19028997	37	1	205603040	R	TSS1500	-12.9013	0.00108412	2.642	2.73e-05
RRAD	Ras-related associated with diabetes	NM_004165	cg19428417	37	16	66959729	F	TSS1500	-10.5703	0.000143655	11.05	7.7e-06
LIF	leukemia inhibitory factor	NM_002309	cg19539004	37	22	30643376	F	TSS1500	-22.2159	0.000954935	15.66	1.42e-07
PAIP1	poly(A) binding protein interacting protein 1	NM_006451	cg19565757	37	5	43557653	R	TSS1500	-27.7863	0.00044558	2.295	0.000149
ANKH	ANKH inorganic pyrophosphate transport regulator	NM_054027	cg21215929	37	5	14873039	R	TSS1500	-14.2693	0.0016924	4.233	6.9e-09
GLRX2	glutaredoxin 2	NM_016066	cg21815704	37	1	193075249	F	TSS1500	-10.6877	0.00181696	2.196	6.84e-07
HSP90AA1	heat shock protein 90kDa alpha (cytosolic), class A member 1	NM_001017963	cg23904247	37	14	102554826	R	TSS1500	-16.7513	4.99e-05	2.143	0.0412
PLXNA4	plexin A4	NM_181775	cg24725079	37	7	132262675	F	TSS1500	-17.9169	0.000453932	3.598	0.000325
IGFBP3	insulin-like growth factor binding protein 3	NM_001013398	cg24772240	37	7	45961537	R	TSS1500	-15.7627	0.000381617	6.254	8.02e-06
BMP8B	bone morphogenetic protein 8b	NM_001720	cg25190824	37	1	40255903	R	TSS1500	11.0014	0.000536415	0.463	0.0193
CNN3	calponin 3, acidic	NM_001839	cg26227186	37	1	95393138	F	TSS1500	-48.2763	0.00103031	2.157	0.0146
IL11	interleukin 11	NM_000641	cg26279025	37	19	55882154	R	TSS1500	-14.4925	0.000123385	58.16	6.4e-09
GINS2	GINS complex subunit 2 (Psf2 homolog)	NM_016095	cg26571870	37	16	85723150	R	TSS1500	-14.3889	0.00114569	3.171	1.29e-08
ACVR1	activin A receptor, type I	NM_001105	cg02089380	37	2	158732891	F	TSS1500	-81.5348	1.74e-05	3.033	0.000363
IL13RA2	interleukin 13 receptor, alpha 2	NM_000640	cg03244736	37	X	114252923	R	TSS1500	-14.6698	0.000451927	3.417	0.00293
UQCRB	ubiquinol-cytochrome c reductase binding protein	NM_001254752	cg04462334	37	8	97249283	F	TSS1500	-15.9343	0.0014915	2.156	0.000415
RNF217	ring finger protein 217	NM_152553	cg05033185	37	6	125303034	F	TSS1500	-7.98933	0.00127689	2.791	3.66e-06
TMEM133	transmembrane protein 133	NM_032021	cg08144237	37	11	100862189	R	TSS1500	-16.3559	0.00213689	2.371	0.000519
ATP13A3	ATPase type 13A3	NM_024524	cg10173291	37	3	194190120	F	TSS1500	-8.39447	0.00167547	3.133	3.63e-08
FCN3	ficolin (collagen/fibrinogen domain containing) 3	NM_003665	cg13082816	37	1	27702055	R	TSS1500	-15.3531	0.00018946	3.983	0.000332
CLEC2D	C-type lectin domain family 2, member D	NM_001004419	cg13553498	37	12	9821986	R	TSS1500	-9.56069	0.0021926	2.139	2.37e-06
IL1RL1	interleukin 1 receptor-like 1	NM_016232	cg16386158	37	2	102927397	R	TSS1500	-62.2204	0.00144708	6.853	3.46e-09
IL6	interleukin 6	NM_000600	cg17067544	37	7	22765321	F	TSS1500	-10.9442	0.000345045	3.91	4.36e-09
KIAA1644	KIAA1644	NM_001099294	cg18649854	37	22	44709891	R	TSS1500	-15.1042	0.00143834	2.522	8.19e-05
TES	testis derived transcript (3 LIM domains)	NM_152829	cg21083093	37	7	115861820	F	TSS1500	-14.2813	3.44e-05	3.169	0.000189
RND1	Rho family GTPase 1	NM_014470	cg22514963	37	12	49259997	F	TSS1500	-18.477	7.86e-05	27.35	2.75e-05
ATP6V0D2	ATPase, H+ transporting, lysosomal 38kDa, V0 subunit d2	NM_152565	cg27040884	37	8	87110546	R	TSS1500	-68.2743	0.00217309	8.177	0.000179
IL1A	interleukin 1, alpha	NM_000575	cg27368523	37	2	113544348	F	TSS1500	-18.4682	0.000599961	3.817	0.0027
TRIB1	tribbles pseudokinase 1	NM_025195	cg00184235	37	8	126442434	F	TSS200	-34.9413	0.00044133	2.313	2.24e-06
KIAA1429	KIAA1429	NM_183009	cg00669777	37	8	95565739	F	TSS200	-156.04	0.00191673	3.073	0.0145
ARL6IP1	ADP-ribosylation factor-like 6 interacting protein 1	NM_015161	cg02426912	37	16	18812920	F	TSS200	-20.2422	0.00110424	3.263	0.000371
NDC80	NDC80 kinetochore complex component	NM_006101	cg02807146	37	18	2571313	R	TSS200	-136.811	0.000295537	4.144	7.54e-09
PDE8A	phosphodiesterase 8A	NM_001243137	cg03461725	37	15	85525160	R	TSS200	-36.8827	0.00174289	2.035	0.000473
PPP4R2	protein phosphatase 4, regulatory subunit 2	NM_174907	cg03770877	37	3	73046015	R	TSS200	-22.2892	0.000890633	2.188	0.0311
CDCA8	cell division cycle associated 8	NM_018101	cg05262634	37	1	38157968	R	TSS200	-34.9877	0.000903096	3.897	8.59e-10
H2AFX	H2A histone family, member X	NM_002105	cg07697569	37	11	118966186	F	TSS200	-536.976	0.00215556	2.443	0.000165
PDRG1	p53 and DNA-damage regulated 1	NM_030815	cg08668662	37	20	30539908	R	TSS200	-51.4904	0.00230998	2.123	3.95e-07
DUSP10	dual specificity phosphatase 10	NM_007207	cg08708209	37	1	221915487	R	TSS200	-31.9863	0.000575395	3.661	0.000276
SMNDC1	survival motor neuron domain containing 1	NM_005871	cg08770590	37	10	112064742	F	TSS200	-29.487	0.00193342	2.186	0.000872
LIPG	lipase, endothelial	NM_006033	cg11038073	37	18	47088421	R	TSS200	-28.558	1.57e-05	9.208	5.83e-07
RLIM	ring finger protein, LIM domain interacting	NM_016120	cg11661234	37	X	73834596	F	TSS200	-15.7904	0.00139596	2.362	1.08e-05
TOP3B	topoisomerase (DNA) III beta	NM_003935	cg13665940	37	22	22337322	F	TSS200	130.267	0.00157337	0.498	0.00197
CDKN3	cyclin-dependent kinase inhibitor 3	NM_005192	cg14144732	37	14	54863539	F	TSS200	-282.525	0.000713221	3.544	0.0057
RFC2	replication factor C (activator 1) 2, 40kDa	NM_181471	cg14330119	37	7	73668867	R	TSS200	-43.7327	0.000685911	2.03	0.000588
ERCC6L	excision repair cross-complementation group 6-like	NM_017669	cg16118600	37	X	71458866	R	TSS200	-14.3475	0.000221454	3.894	5.6e-06
CENPE	centromere protein E, 312kDa	NM_001813	cg16532752	37	4	104119610	R	TSS200	-26.7889	2.51e-05	3.451	1.86e-08
WASH5P	WAS protein family homolog 5 pseudogene	ENST00000606872	cg20826792	37	1	29425	F	TSS200	-12.1794	0.000492838	2.38	0.000916
OXCT1	3-oxoacid CoA transferase 1	NM_000436	cg21515384	37	5	41870856	R	TSS200	-14.53	0.0015651	2.888	0.00101
PPP1R15A	protein phosphatase 1, regulatory subunit 15A	NM_014330	cg22143490	37	19	49375485	R	TSS200	-175.48	0.00027765	2.865	3.42e-07
FZD1	frizzled class receptor 1	NM_003505	cg23191380	37	7	90893747	R	TSS200	-80.1333	0.000202967	5.965	5e-06
MAP2K1	mitogen-activated protein kinase kinase 1	NM_002755	cg24449302	37	15	66679100	F	TSS200	-22.733	0.000294909	2.256	0.00214
TRIM59	tripartite motif containing 59	NM_173084	cg26433838	37	3	160167749	R	TSS200	-29.1078	0.000789333	2.594	2.74e-06
HUS1	HUS1 checkpoint homolog (S. pombe)	NM_004507	cg27019250	37	7	48019388	F	TSS200	-34.4698	0.000481957	2.092	0.00212
PCDH10	protocadherin 10	NM_020815	cg27600205	37	4	134070416	R	TSS200	-327.417	0.00222371	2.194	0.00909
FAIM	Fas apoptotic inhibitory molecule	NM_001033030	cg02712878	37	3	138327370	R	TSS200	-14.7685	7.6e-05	2.203	0.000156
PHGDH	phosphoglycerate dehydrogenase	NM_006623	cg07090813	37	1	120254330	F	TSS200	-26.7665	0.000302743	3.323	1.26e-08
ATL1	atlastin GTPase 1	NM_181598	cg07159958	37	14	51026681	F	TSS200	-9.12517	0.000388675	2.567	0.00368
ARMCX4	armadillo repeat containing, X-linked 4	NR_028407	cg13484245	37	X	100673096	R	TSS200	25.5121	0.00120247	0.311	6.46e-07
TYRO3	TYRO3 protein tyrosine kinase	NM_006293	cg24491553	37	15	41851210	R	TSS200	-7.67071	6.8e-05	2.003	0.00033
FOXS1	forkhead box S1	NM_004118	cg07809909	37	20	30433512	F	TSS200	-24.3044	0.00225694	5.86	2.02e-05
TRIM36	tripartite motif containing 36	NM_018700	cg09312149	37	5	114516420	R	TSS200	-20.3309	0.0015884	2.15	3.03e-05
CHORDC1	cysteine and histidine-rich domain (CHORD) containing 1	NM_012124	cg09488196	37	11	89956718	F	TSS200	-24.3108	0.000256528	2.525	2.59e-05
ERN2	endoplasmic reticulum to nucleus signaling 2	NM_033266	cg16786481	37	16	23724835	R	TSS200	-13.7789	0.000115274	2.639	0.00199
DNAJA4	DnaJ (Hsp40) homolog, subfamily A, member 4	NM_018602	cg21642988	37	15	78558406	R	TSS200	-28.3559	0.00102397	2.246	1.76e-05
DNA2	DNA replication helicase/nuclease 2	NM_001080449	cg24118715	37	10	70232072	R	TSS200	-24.7182	0.000866887	3.392	0.00526
SNORD7	small nucleolar RNA, C/D box 7	NR_003037	cg02963846	37	17	33900674	F	TSS200	21.2574	0.00065185	0.479	0.000104
BTK	Bruton agammaglobulinemia tyrosine kinase	NM_000061	cg03791917	37	X	100641287	R	TSS200	-21.5302	0.000121121	3.33	0.000375
SLC25A34	solute carrier family 25, member 34	NM_207348	cg06761377	37	1	16062757	F	TSS200	-15.09	0.000553937	2.782	0.00032
C11orf94	chromosome 11 open reading frame 94	NM_001080446	cg12019650	37	11	45928841	F	TSS200	-15.6482	0.000620031	2.054	0.00929
STARD13	StAR-related lipid transfer (START) domain containing 13	NM_001243466	cg16795307	37	13	33780362	R	TSS200	-31.2294	0.00245055	2.039	0.0186
LXN	latexin	NM_020169	cg22210627	37	3	158390671	F	TSS200	29.8119	0.000177679	0.452	3.98e-07
CFH	complement factor H	NM_000186	cg23557926	37	1	196620963	F	TSS200	28.5091	0.000519756	0.393	0.00029
LAPTM5	lysosomal protein transmembrane 5	NM_006762	cg24459792	37	1	31230846	F	TSS200	-15.6841	0.000461621	2.768	3.99e-07
SSH1	slingshot protein phosphatase 1	NM_001161331	cg27553890	37	12	109221424	R	TSS200	-16.3921	5.66e-06	4.703	1.16e-07
