# Supplementary material for: Angiogenic Transformation in Human Brain Micro Endothelial Cells: Whole Genome DNA Methylation and Transcriptomic Analysis
Source: Front Physiol. 2019 Dec 11;10:1502. doi: 10.3389/fphys.2019.01502 (PMC6917667; doi:10.3389/fphys.2019.01502)
Supplement: TABLE S6 — Enlists genes with correlated changes in mRNA expression and CpG methylation. [file Table_6.XLSX]

## Sheet: File_ctrl_vs_TF_p05__25184
Supplemental Table S6: Enlists genes with correlated changes in mRNA expression and CpG methylation.
Gene Symbol	Gene Name	Primary Accession	Illumina id	Genome_Build	CHR	MAPINFO	Strand	UCSC_RefGene_Group	Relation_to_UCSC_CpG_Island	Enhancer	Mean Difference TF - Control	Methylation Fold Change TF / Control	Methylation P-Value	Gene Expression Fold Change TF / Control	Gene Expression P Value	SourceSeq
ID2	inhibitor of DNA binding 2, dominant negative helix-loop-helix protein	NM_002166	cg14984257	37	2	8822600	F	1stExon	Island		-0.0961783	-10.3974	0.000522145	56.99	4.99e-08	TCTTACCTGCAAGGACAGGATGCTGATATCCGTGTTGAGGGTGGTCAGCG
FOSB	FBJ murine osteosarcoma viral oncogene homolog B	NM_006732	cg00314427	37	19	45976120	R	Body	Island	TRUE	-0.0494138	-20.2373	0.000460069	98.19	1.73e-06	CCCCAACCTGACGGCTTCTCTCTTTACACACAGTGAAGTTCAAGTCCTCG
NR4A3	nuclear receptor subfamily 4, group A, member 3	NM_173200	cg12190044	37	9	102590743	R	Body	Island	TRUE	-0.0636463	-15.7118	0.000421092	31.87	1.24e-08	CGGTGGGGACTGCTTGAAGTACATGGAGGTGCTGGGCAGCACCTCGTCCT
HEY1	hes-related family bHLH transcription factor with YRPW motif 1	NM_001040708	cg26047313	37	8	80677891	F	Body	Island		-0.0335973	-29.7643	0.00157037	49.61	4.72e-08	CGGGTCAGAGGCATCTAGTCCTTCAATGATGCTCAGATAACGCGCAACTT
SMAD7	SMAD family member 7	NM_005904	cg20800216	37	18	46471349	F	Body	N_Shelf	TRUE	-0.127468	-7.84511	6.17e-07	31.72	2.72e-08	TATCGTGGGACTCCCAGCTCCTTTACCTTGTACTCATTCTCAATAGTTCG
PTGS2	prostaglandin-endoperoxide synthase 2 (prostaglandin G/H synthase and cyclooxygenase)	NM_000963	cg22365834	37	1	186646027	R	Body	N_Shelf		-0.197997	-5.05058	0.000569238	50.64	6.02e-08	CGGTGAAACTCTGGCTAGACAGCGTAAACTGCGCCTTTTCAAGGATGGAA
FZD7	frizzled class receptor 7	NM_003507	cg10634136	37	2	202901470	F	1stExon	S_Shore		-0.0472246	-21.1754	0.00210653	21.74	4.93e-05	CAGGGCTGTACCTTTCCCGGGGCCTCACAGGGGTCTGGACAGGCCACTCG
SMAD6	SMAD family member 6	NM_005585	cg25915536	37	15	67074303	R	3'UTR	S_Shore		-0.127395	-7.8496	0.0016938	9.409	1.15e-07	CGAGTGACTGGTATTAGCTTTTTGTCTGGGCATTAATATCTCAAAAACCA
NAP1L5	nucleosome assembly protein 1-like 5	NM_153757	cg01578057	37	4	89618667	R	1stExon	1stExon		-0.107088	-9.33811	0.000489835	2.467	6.04e-08	GCTTCTATCTTATCGCATCGCTTCTGCAGCTTTTTGAGGGCCAGGACTCG
HYAL4	hyaluronoglucosaminidase 4	NM_012269	cg05341115	37	7	123485591	R	1stExon	1stExon		-0.0292747	-34.1592	0.00256161	2.034	0.00037	TGAGCCACCGTGCCTTGCTATTTATGCCATCTATTTCACTGAAGATTCCG
RAD54L	RAD54-like (S. cerevisiae)	NM_003579	cg17079378	37	1	46713440	R	1stExon	1stExon		-0.00203722	-490.865	0.00197128	2.867	7.38e-05	TTCGATTGACCCGGTCTTGGCGGGTCGGTGAGTCTTGGCGGCTGTTAACG
TXNIP	thioredoxin interacting protein	NM_006472	cg20064151	37	1	145438865	R	1stExon	1stExon		0.0849763	11.768	0.00148418	0.0535	4.49e-09	GAAGATCAAGTCTTTTGAGGTGGTCTTTAACGACCCTGAAAAGGTGTACG
TNIP3	TNFAIP3 interacting protein 3	NM_024873	cg20950277	37	4	122085241	F	1stExon	1stExon		-0.0639003	-15.6494	0.00226813	4.226	0.0018	CGGCAATCATTCTAGATGTGCCCTGTACAAAATGTGCCATGGAAGCTGTT
AOC3	amine oxidase, copper containing 3	NM_003734	cg25512683	37	17	41003399	R	1stExon	1stExon		-0.0686959	-14.5569	0.000663877	2.677	0.00193	CGGCCAGAATGAGGAGCACGAGGATTGTCTTCTGGTTCATTTTCCCACGA
S100P	S100 calcium binding protein P	NM_005980	cg26233331	37	4	6695614	R	1stExon	1stExon		-0.054185	-18.4553	0.000235807	5.346	7.45e-06	TGAGGCTGCCTTATAAAGCACCAAGAGGCTGCCAGTGGGACATTTTCTCG
MAK16	MAK16 homolog (S. cerevisiae)	NM_032509	cg00692760	37	8	33357598	R	3'UTR	3'UTR		-0.0377379	-26.4986	0.00205927	2.708	1.85e-05	CTTAAATTTTACAAACTTTTGATCATAATGCTTTTGCCCATACTGTCTCG
PHLPP2	PH domain and leucine rich repeat protein phosphatase 2	NM_015020	cg01219130	37	16	71680526	R	3'UTR	3'UTR		-0.0582632	-17.1635	0.00192116	2.207	6.12e-07	CGGGTTGTAGAATAGTGATGTCTAAAAATTAAAGTTATTTTGGGAATACA
RAP2C	RAP2C, member of RAS oncogene family	NM_021183	cg01409685	37	X	131347226	R	3'UTR	3'UTR		-0.0274917	-36.3746	0.00211872	2.422	0.0149	CGCAGCAAATGCCAGACTAGCCTGACAGTATCAGGAATGAAATTGATCTT
E2F2	E2F transcription factor 2	NM_004091	cg03058012	37	1	23836028	R	3'UTR	3'UTR		-0.0471406	-21.2131	0.000406328	2.911	0.000745	AACTCAACCTGAAATAAATACAAAGGCATTATGTGCTTCTTGGTACGTCG
RPP30	ribonuclease P/MRP 30kDa subunit	NM_001104546	cg03087855	37	10	92661845	F	3'UTR	3'UTR		-0.0306475	-32.6291	0.00206984	3.411	2.03e-07	CGCCCGGCCCGAGAAAATACAGTTTTAAAAAGAGAAAGCTTTATAACCTC
ZNF337	zinc finger protein 337	NM_015655	cg03227940	37	20	25655097	R	3'UTR	3'UTR		0.0240026	41.6622	0.00149556	0.493	0.000621	CAAGCCTTTTCATAAGGGCACCTGATCCCATTCGCAAAGCTCTATCTTCG
CENPL	centromere protein L	NM_033319	cg04555837	37	1	173768981	R	3'UTR	3'UTR		-0.088083	-11.3529	0.000979737	3.219	5.98e-05	TCCATTAGATACATCTCATTTGAATCCTAAGAGTTTAAACATAATAAACG
COQ10B	coenzyme Q10 homolog B (S. cerevisiae)	NM_025147	cg05059169	37	2	198339611	R	3'UTR	3'UTR		-0.0491362	-20.3516	0.00158168	2.743	0.00714	CGGAGAAAGTGGCAAACTACTGGAAAAGTAGCTTAAAGCTCTGGACCACT
USP37	ubiquitin specific peptidase 37	NM_020935	cg05414074	37	2	219316097	R	3'UTR	3'UTR	TRUE	-0.063508	-15.746	0.000599024	2.918	4.37e-05	TACTTGGAGATCCAGCTGTTGCCCCCTGTTTAAAACAAAAGACCACCTCG
GZF1	GDNF-inducible zinc finger protein 1	NM_022482	cg08131626	37	20	23353004	F	3'UTR	3'UTR		-0.0188444	-53.0662	0.00222407	2.403	0.0154	CGGGTCCATAAGCCTTTATTTCATACAGTCCTAGGATTAAGCTGTTTAAC
GSPT1	G1 to S phase transition 1	NM_002094	cg08843971	37	16	11963173	F	3'UTR	3'UTR		-0.124719	-8.01802	0.00194401	2.452	0.0336	AGATGCCATCTAGTACATCCTTGATCTTGTTTCTTTCGTGAGAGATCTCG
GCH1	GTP cyclohydrolase 1	NM_001024071	cg09822488	37	14	55310700	F	3'UTR	3'UTR		-0.127488	-7.84388	0.000794517	2.495	4.84e-05	CGATCGGCAACCAACGCACACACACTGAATGAAGCTCAGCTCCTAATGAG
FERMT2	fermitin family member 2	NM_001135000	cg09915883	37	14	53324934	F	3'UTR	3'UTR		-0.0678054	-14.7481	0.00209514	2.045	0.00988	CGTGCTTGTTTAGTGCACATATTAACTGGTCTGGTAAGGCAAAGAAGTTT
SETD7	SET domain containing (lysine methyltransferase) 7	BC066361	cg10541534	37	4	140429995	R	3'UTR	3'UTR		-0.0594208	-16.8291	0.00094752	2.777	6.48e-05	CGGAAGGGTTTGTTTCCCGTTTGAACCTAAACGCAAGTGGAAAAGAATAC
CCNB1	cyclin B1	NM_031966	cg13647309	37	5	68473620	F	3'UTR	3'UTR		-0.0658097	-15.1953	0.0020669	3.587	2.65e-10	AAGGAGTTTTTAAAAATATCCCCACCATACCTTTTAAGACAACTTTTCCG
TRMT6	tRNA methyltransferase 6 homolog (S. cerevisiae)	NM_015939	cg14346362	37	20	5918840	R	3'UTR	3'UTR		-0.0802328	-12.4637	0.000959781	2.752	8.46e-09	TTTCTTCCATGAATTGCCCTCCTTTCGGTACCCGCCATGTTTTAGTTACG
PML	promyelocytic leukemia	NM_033247	cg16051421	37	15	74328425	F	3'UTR	3'UTR		0.0483189	20.6958	0.000148386	0.304	0.00149	AGAAGACCCAGGTCTCCCTGCCCAGAGGTCCATGCATAGCCATTCATTCG
ZBTB41	zinc finger and BTB domain containing 41	NM_194314	cg16109012	37	1	197124878	R	3'UTR	3'UTR		-0.0684306	-14.6133	0.000380977	2.393	0.000611	TTAAGGTTGATAGAAAATTATTAGTGTACCTATTTCATGACCTGCCATCG
RIT1	Ras-like without CAAX 1	NM_006912	cg16589843	37	1	155869926	R	3'UTR	3'UTR		-0.0800358	-12.4944	0.000545234	2.018	0.000505	TGGTATACATATTCTCCTGGGTATAAACAAATTTACATTAATTAATAGCG
CPEB2	cytoplasmic polyadenylation element binding protein 2	NM_182485	cg19929852	37	4	15068643	F	3'UTR	3'UTR		-0.0536239	-18.6484	0.00190039	2.498	0.00758	CGGGACTGAAAACGTTAGAGACACACTGCATTGCAGATAAAATGCAGGCA
ETF1	eukaryotic translation termination factor 1	NM_001256302	cg21141827	37	5	137843400	F	3'UTR	3'UTR		-0.0649923	-15.3864	0.000522276	2.059	0.000792	TGTTGAAAGGGTGAGCTAATAGGAGGCACTTTCAACTTCACTCCCTCACG
TMPO	thymopoietin	NM_003276	cg22261158	37	12	98941654	R	3'UTR	3'UTR		-0.0889852	-11.2378	0.0013802	4.139	0.008	CGTGCCAAAGAGATACCATTCAGTTGGATTTTCTAGGGTCAACATGAAGA
SIRT1	sirtuin 1	NM_012238	cg23988827	37	10	69676715	F	3'UTR	3'UTR		-0.135685	-7.37001	0.00134991	3.427	5.92e-06	CGGAATGTTAAATTAATGTAAAGGGAACAGCTAATCTAGACCAAAGAATG
TMEM64	transmembrane protein 64	NM_001008495	cg24030920	37	8	91637884	R	3'UTR	3'UTR		-0.0306421	-32.6348	0.000841727	2.982	0.00407	CGTGATTGTCAAGAGCCTAGTGTGCTATCTAAGGTCTAGCAGTCACTTCA
BCCIP	BRCA2 and CDKN1A interacting protein	NM_078468	cg24383528	37	10	127541906	F	3'UTR	3'UTR		-0.0515621	-19.3941	0.00143894	2.28	0.00237	CGTTTGAGATCTCAAATGTTAGGATTTTCTGAAGTCTCAGTGTCTTTCAG
PPP1CC	protein phosphatase 1, catalytic subunit, gamma isozyme	NM_002710	cg24630164	37	12	111158279	F	3'UTR	3'UTR		-0.0668631	-14.9559	0.00235028	2.57	0.0377	CGGGGAAAAGTGTGCTTTAATTAAATATACATCATACCAGTGATGCTGGC
RIF1	replication timing regulatory factor 1	NM_018151	cg26639076	37	2	152331806	F	3'UTR	3'UTR		-0.151007	-6.62221	0.000378982	2.436	4.84e-05	GTTTTGCTTTCACATCTCAGTAAGATAATTAAATTTCCTGAAAAACCACG
IL21R	interleukin 21 receptor	NM_181078	cg27027151	37	16	27461638	R	3'UTR	3'UTR	TRUE	-0.0699138	-14.3033	0.000450722	15.96	1.44e-08	TAAAAATTCCCTTTATGCACCCAAGAGATATTTATTAAACACCAATTACG
TAF4B	TAF4b RNA polymerase II, TATA box binding protein (TBP)-associated factor, 105kDa	NM_005640	cg27514550	37	18	23971201	F	3'UTR	3'UTR		-0.177933	-5.62009	0.000166449	2.718	2.05e-07	TGTGATTCTAACTACAGTGATTATTTTTCACCGGCTGTATTCCACACACG
HAPLN1	hyaluronan and proteoglycan link protein 1	NM_001884	cg01045835	37	5	82969530	R	5'UTR	5'UTR		0.0455567	21.9507	0.000262671	0.433	5.05e-05	ACCCAATCTGTTCAGAAAGTTACTGTAGCTGCCTTTAAGAGCCGAAGACG
FBXO34	F-box protein 34	NM_152231	cg07489121	37	14	55747523	F	5'UTR	5'UTR		-0.0702829	-14.2282	8.38e-05	2.296	4.06e-05	CTCCATGGATGCTCAAGTTCCTGATATATGGCTGGGCGTGGTGGTTCACG
TNRC6C	trinucleotide repeat containing 6C	NM_001142640	cg09029192	37	17	76015204	F	5'UTR	5'UTR	TRUE	-0.0473091	-21.1376	0.00105542	2.093	0.00259	AGCCATTTTAGTTGGCTTGAGTCTCATCATGCTCAGTCACTTCAATATCG
GPR56	G protein-coupled receptor 56	NM_201525	cg09421111	37	16	57673122	R	5'UTR	5'UTR		-0.0635905	-15.7256	0.00192007	2.238	5e-06	TTGGAAGCTCTGGCTCTTTGTGGTCCCTTCAAGACAGGCAGGTGTCCCCG
CHST3	carbohydrate (chondroitin 6) sulfotransferase 3	NM_004273	cg09686390	37	10	73735333	R	5'UTR	5'UTR	TRUE	-0.0366883	-27.2566	0.000266693	14.99	1.97e-05	CATTTAGGAGAACATCCAGCTTCACTGGCTGTGCAAATCCCACCCATGCG
ITPR1	inositol 1,4,5-trisphosphate receptor, type 1	NM_002222	cg12320198	37	3	4557437	R	5'UTR	5'UTR	TRUE	-0.151804	-6.58744	0.000122449	2.547	1.35e-05	CGCAGCTAGTTAGAGGCAGTCTTAGAAAAAGCTCTTAAGTCTCAGGAAAT
RNF38	ring finger protein 38	NM_194328	cg14608230	37	9	36382242	F	5'UTR	5'UTR	TRUE	-0.206475	-4.8432	0.000251469	2.03	1.49e-05	CGTTGTACAGACATTACAGTATAGAACACTGCTACAGATTTAGGGATCAA
ZNF697	zinc finger protein 697	NM_001080470	cg14783517	37	1	120180010	F	5'UTR	5'UTR	TRUE	-0.0431365	-23.1822	0.0010047	2.698	3.13e-06	TACATTCTCTACAGCAAAATGTACTTGGAGTGGTGCTGTCCCTGCCACCG
LRRC8C	leucine rich repeat containing 8 family, member C	NM_032270	cg15027190	37	1	90124886	F	5'UTR	5'UTR	TRUE	-0.0611019	-16.3661	0.000205371	2.565	1.75e-07	CGGAATGTTAGGTTTAGTGACTTAGATTAACCAGTTCTAAAAACAGATTA
VASN	vasorin	NM_138440	cg16628641	37	16	4426265	F	5'UTR	5'UTR		-0.0497914	-20.0838	0.00215518	4.932	4.83e-05	AGGCGGGACTGTGCCGGCGGCCAGGACGGCTGGCTCCAGTTTCGCTGACG
CREM	cAMP responsive element modulator	NM_001881	cg16715662	37	10	35456063	F	5'UTR	5'UTR		-0.0425941	-23.4774	0.00102741	2.271	0.00922	ATAAAGATGTAAAATATTCCACTTTAATTTTTTTTCCCCCCACTGAGACG
HIVEP2	human immunodeficiency virus type I enhancer binding protein 2	NM_006734	cg18458689	37	6	143214086	F	5'UTR	5'UTR	TRUE	-0.0352821	-28.343	0.00177118	2.816	1.26e-05	TTGGAAGGGGCTTGCACCCATCCGTCATGTAACTTTTGCTCTATGTTACG
PRICKLE2	prickle homolog 2 (Drosophila)	NM_198859	cg22801134	37	3	64210439	F	5'UTR	5'UTR	TRUE	-0.124397	-8.03878	0.00153717	10.28	2.27e-07	CGCAGGGCCACCAAAAATGCTACCTGGCCAAGAAAACGAAGACCCAATAT
MEF2D	myocyte enhancer factor 2D	NM_005920	cg24642236	37	1	156460304	R	5'UTR	5'UTR	TRUE	-0.0519108	-19.2638	4.53e-05	2.209	0.000435	CGGTGAGTTAAAATTAGCTCAGTGCCCAGGCTAAAAATAGCCCCTGCCCA
GPBAR1	G protein-coupled bile acid receptor 1	NM_001077191	cg25124402	37	2	219125749	R	5'UTR	5'UTR	TRUE	-0.0535294	-18.6813	0.00170999	2.505	0.000778	GGGCTGAGTCCTGCCAGCCTCATTTCTCTATCCCTCTGAGAACCCAGACG
ANLN	anillin, actin binding protein	NM_018685	cg00267323	37	7	36445177	R	Body	Body	TRUE	-0.0623543	-16.0374	0.00233997	4.927	0.000506	GAACCTTGGCTTCCCTATATACATGCCCTAGGGAAGGCCTAGAATCTTCG
MFSD2A	major facilitator superfamily domain containing 2A	NM_001136493	cg01058711	37	1	40428336	R	Body	Body		-0.0578842	-17.2759	0.00107641	3.872	1.59e-05	CGGCCATGACCCCGGCCCCGGATGCCACTGCCGAAACCTCCGCGGAAGGC
BRI3	brain protein I3	NM_001159491	cg01877450	37	7	97915802	F	Body	Body	TRUE	-0.0600678	-16.6479	0.000485046	3.069	1.66e-07	TGAGTTGGTGAGGTGGGTTTCAACCTTCTCAACCGCTCTGGTCCTGACCG
PROX1	prospero homeobox 1	NM_002763	cg01902845	37	1	214170993	R	Body	Body		0.0420292	23.793	0.00206027	0.346	0.00027	TGAACACTGCCATGTCGCAAGTTGTGGACACTGTGGTCAAAGTCTTTTCG
ZSWIM6	zinc finger, SWIM-type containing 6	NM_020928	cg02097667	37	5	60751658	F	Body	Body	TRUE	-0.0490284	-20.3963	0.0025529	2.307	0.0255	AACTTATCAACACTTCCCTAGCTTCCTTAACAGTGTTAACAGTGGGGGCG
CHM	choroideremia (Rab escort protein 1)	NM_001145414	cg02168925	37	X	85226163	F	Body	Body		-0.0867612	-11.5259	0.00203282	3.016	1.59e-05	AGAATTCAAATGGATTAGTGCAAACCCATTACCACTGCTTGGAAAATACG
HMGA2	high mobility group AT-hook 2	NM_003484	cg02534850	37	12	66228466	F	Body	Body	TRUE	-0.130279	-7.67583	0.00117115	2.114	0.000109	CGAGGCACTAGTGCTAAGCACTGTTTTCAAGCTCAAGAGATGTATTTGCT
ACSL5	acyl-CoA synthetase long-chain family member 5	NM_203380	cg02574374	37	10	114163611	R	Body	Body		-0.0855471	-11.6895	0.00169472	2.061	0.00146	CGTGGGTATTTAGATTGTTTTCAAGCTTGACACTTTAAATTACGCTAAAT
SLC7A2	solute carrier family 7 (cationic amino acid transporter, y+ system), member 2	NM_001008539	cg02786378	37	8	17396844	F	Body	Body		-0.0775705	-12.8915	0.000947601	4.174	2.74e-06	ATGATTTTCATGAGCCTAATGATACATGTGAGATCTTTCTTAGCCCCACG
BTBD11	BTB (POZ) domain containing 11	NM_001018072	cg03198269	37	12	108028454	F	Body	Body	TRUE	-0.0548933	-18.2172	0.000482285	2.572	3.66e-07	GTTCTGCAACCCAAAACTACAGCTGCCCTTCAGTGCTGGGGACACACGCG
TBXAS1	thromboxane A synthase 1 (platelet)	NM_030984	cg03604364	37	7	139705703	F	Body	Body		-0.0446119	-22.4155	0.00165505	3.369	3.48e-05	CGGGTGATGCTGCTGCTGCTGACCCTTGCCCATCCCGGAGCTCACTTTGA
FAT1	FAT atypical cadherin 1	NM_005245	cg03844826	37	4	187609604	R	Body	Body	TRUE	-0.0666626	-15.0009	0.000578025	3.847	0.00111	TGTTCATAAGGTAATCGCGGACCCCATGTGGTCCTTTCACAGGGGCTTCG
GLI2	GLI family zinc finger 2	NM_005270	cg04223863	37	2	121678052	R	Body	Body	TRUE	-0.0639901	-15.6274	8.2e-05	11.82	2.35e-06	GAATCCACAGGATCATTTCTAATGGGGCATTAACTTGAGCCAGGTTTCCG
COL17A1	collagen, type XVII, alpha 1	NM_000494	cg04545398	37	10	105819003	F	Body	Body	TRUE	-0.0577192	-17.3253	0.000802931	2.624	0.000403	CGTCAAGAAATGTGGTTATCAGACAAAGAACGCAGATATTTGGGAAGAAA
LBH	limb bud and heart development	NM_030915	cg05247661	37	2	30472410	F	Body	Body	TRUE	-0.109083	-9.16733	7.47e-05	3.006	4.09e-09	GCGTGGGTTAGGACCGGGGGAATGAAAACCATGCCCTTGTCACTACCCCG
TNS1	tensin 1	NM_022648	cg05386769	37	2	218681558	R	Body	Body	TRUE	-0.0998485	-10.0152	0.00147016	2.081	3.54e-07	ATTCTAGGTGTCCTGGCTTGGCAGGCTCAGGGCAGGACCTGAGAGTGACG
ASCC3	activating signal cointegrator 1 complex subunit 3	NM_022091	cg05757007	37	6	101053555	R	Body	Body		-0.232362	-4.30363	0.00060838	2.803	3.72e-07	ACTAGAATTACAGCTTTGCCTTGGTCATCGAACTGCGGCCTCCCAGCACG
C3orf52	chromosome 3 open reading frame 52	NM_024616	cg05966699	37	3	111830759	R	Body	Body		-0.0822698	-12.1551	0.000514779	7.163	1.06e-08	CGGCTGGGAGATGTGCCAGATCCTGCAGATCAAATGAATAATGGAGAGTC
SRGN	serglycin	NM_002727	cg06041695	37	10	70863705	F	Body	Body		-0.0504572	-19.8188	0.00150219	2.009	0.00494	CGGCTCTGGATCAGGATCTGGGAGTGGCTTCCTAACGGAAATGGAACAGG
NCAPG2	non-SMC condensin II complex, subunit G2	NM_001281932	cg06614336	37	7	158441237	F	Body	Body		-0.202608	-4.93564	0.000179173	3.453	3.48e-06	CGGCAAATGGACGACAACCACGCCAAATGGACGACAACCACGCCAAATGG
ARHGEF7	Rho guanine nucleotide exchange factor (GEF) 7	NM_003899	cg06787317	37	13	111885879	R	Body	Body	TRUE	-0.139187	-7.18458	0.00103822	2.621	8.93e-08	CGGGACAAGAGCAAGGGACATTTCCATATACATGATATTAAAACAAAAAC
GP6	glycoprotein VI (platelet)	NM_001083899	cg07280985	37	19	55549414	R	Body	Body		-0.0746543	-13.3951	0.000528907	2.74	2.52e-06	CTGACCCAGCCATGAATACACTGGAATAACTCATGCAAAATGCCAGCTCG
NEDD9	neural precursor cell expressed, developmentally down-regulated 9	NM_182966	cg08134091	37	6	11213750	F	Body	Body	TRUE	-0.042271	-23.6569	0.000384973	8.575	9.57e-08	CCGGGTGAAGCTTCTGATTGGTCCCATGCAGGAGACTGCCTCCAGTCACG
ATP2A2	ATPase, Ca++ transporting, cardiac muscle, slow twitch 2	NM_001681	cg08329428	37	12	110769420	R	Body	Body	TRUE	-0.0608474	-16.4346	0.000825423	2.05	0.0162	CGCCTATAATCCCAGCACTGAGAGGCCAAGGTGAGTAGATCATGAGGACA
DDX46	DEAD (Asp-Glu-Ala-Asp) box polypeptide 46	NM_014829	cg08633242	37	5	134099637	F	Body	Body		-0.0228049	-43.8502	1.25e-05	2.226	1.99e-07	CGGTCTAGAAGTCGCTCACCCTCAGACAAAAGAAGTAAACGTGGAGATGA
SGK1	serum/glucocorticoid regulated kinase 1	NM_005627	cg08698685	37	6	134513473	F	Body	Body	TRUE	-0.0587319	-17.0265	0.00225294	2.788	1.16e-06	CGTGAGCTGCATTGTTCACTGACATCTACTTTAACGACTCCAGCCCAGCC
CHST11	carbohydrate (chondroitin 4) sulfotransferase 11	NM_018413	cg09237846	37	12	105114399	F	Body	Body		-0.0629203	-15.8931	0.000185182	3.347	2.74e-06	CGGTCGGCAGCCAAGACAAAAAACCCACAGACGTTTGGCCTTTGAGGCAG
ZC3H13	zinc finger CCCH-type containing 13	ENST00000378921	cg09789239	37	13	46614084	F	Body	Body	TRUE	-0.108267	-9.23642	0.00244924	2.059	0.0292	TATTGATTCAGAATAACAGATGCCTCAGCGGTCTGCCAGTAAATGTACCG
ECT2	epithelial cell transforming 2	NM_018098	cg10028625	37	3	172494364	F	Body	Body	TRUE	-0.0950467	-10.5211	0.000596788	2.282	0.0111	CGGTACACACAGAGAATAACTTTACAGAGGCAGTCATCTAATAAATGCTG
ABTB2	ankyrin repeat and BTB (POZ) domain containing 2	NM_145804	cg10885779	37	11	34331908	R	Body	Body	TRUE	-0.0527953	-18.9411	0.000704513	3.388	0.00132	CGGGACTCACATTTCTGGCACTCACAGCAGGGTAGATGCTGGAGCTTTAA
ARID5B	AT rich interactive domain 5B (MRF1-like)	NM_032199	cg11283402	37	10	63820445	F	Body	Body	TRUE	-0.0829706	-12.0525	0.00187194	2.057	1.39e-05	CGTAGAAGTCAACCCAATAGGCTAGACTTTCAAGTCTAGCTTTTAATGTT
SLC8A1	solute carrier family 8 (sodium/calcium exchanger), member 1	NM_021097	cg11720686	37	2	40440949	F	Body	Body	TRUE	-0.102667	-9.74023	0.00100707	2.339	0.000103	CGCTGGGGATATTACACTGGGGATAATTCATCAAGCTTGCTTTGGGTGTT
CNKSR3	CNKSR family member 3	NM_173515	cg11868921	37	6	154812487	F	Body	Body	TRUE	-0.0436776	-22.895	0.000876723	2.549	2.96e-05	CGGTAGGTACTCAATAAACAGCTGGTGAATTCTATTTCAAGTTGATTGGT
STK24	serine/threonine kinase 24	NM_001032296	cg11944797	37	13	99135711	R	Body	Body	TRUE	-0.0537494	-18.6049	0.00153575	3.402	0.000476	AGAAACCTTTTTTAAGGCTCTTTGGTCCCTTTGGGAGAGCACTGAGTCCG
ACOT11	acyl-CoA thioesterase 11	NM_147161	cg12179353	37	1	55089104	F	Body	Body		-0.066026	-15.1455	0.000258933	2.177	1.27e-06	CGGCCCAGAGTCCCTGAGGCTCCCTGCAGCTGGAATCCTGTGGGAGGCAG
MIPEP	mitochondrial intermediate peptidase	NM_005932	cg12255352	37	13	24375209	R	Body	Body	TRUE	-0.067989	-14.7083	0.00124342	2.472	0.00106	TTATGTACCTAAATTTGTATCAACTCCATAAGCATTATAAAGACTCTTCG
FAM107B	family with sequence similarity 107, member B	NM_001282695	cg12354318	37	10	14582415	R	Body	Body	TRUE	-0.0278351	-35.9259	0.00182604	2.012	0.00631	AAATATTCACAGCAACAGCATGTTTCTATCCGCATGACAGTCCACACCCG
PCDH7	protocadherin 7	NM_002589	cg12840245	37	4	30855141	F	Body	Body	TRUE	-0.0538632	-18.5656	0.000746981	3.823	7.38e-07	CGTAGCAACCCTATTAGATCCTAGGAGGATTCATTCAAGTTTTATATATT
TSPAN8	tetraspanin 8	NM_004616	cg13355032	37	12	71524030	R	Body	Body		-0.0883375	-11.3202	0.00107948	3.017	1.38e-06	CGGCAGCAGTGACTTCAAGCCTGTTATCCCAGCATTTTCAGAGGCTGAGG
CENPP	centromere protein P	NM_001012267	cg13407278	37	9	95298746	R	Body	Body		-0.097523	-10.254	0.000818276	2.62	3.11e-06	CGAGGTGGGTGGGCAGATGAGTTAAATATTATTAATCCAATTTAAAATAG
BLM	Bloom syndrome, RecQ helicase-like	NM_000057	cg13410000	37	15	91357521	F	Body	Body	TRUE	-0.0352899	-28.3367	0.00056968	2.806	8.22e-05	CGGGTAATGCTGCCCACAGCCATCACTGTAAACATGCCGGCCCCATGGTT
PCDH9	protocadherin 9	BC150296	cg13700000	37	13	67570127	F	Body	Body	TRUE	-0.0756626	-13.2166	0.00236916	3.854	5.02e-05	CGGCTGATGGGCTAAACTCTCCAGAAGATACAAATATGTGAACAACACTG
MELK	maternal embryonic leucine zipper kinase	NM_014791	cg13720890	37	9	36622754	F	Body	Body		-0.0497931	-20.0831	0.00222164	4.007	1.51e-05	CGGAGTTTACTACAGCATTATGATTATGTATTGGTGAGATGGCCTGCCTC
PBX3	pre-B-cell leukemia homeobox 3	NM_006195	cg14185104	37	9	128649813	F	Body	Body	TRUE	-0.0877797	-11.3922	0.00189081	2.153	0.000733	AAACTGGCAAACATGCTGACCTTGTGTGCAAAGGCAGAATTGTGCATACG
LRCH1	leucine-rich repeats and calponin homology (CH) domain containing 1	NM_001164213	cg14269510	37	13	47204488	R	Body	Body	TRUE	-0.129966	-7.69432	0.00215324	3.608	0.000194	AAGTTATAAAAATGGGCATTCTCTTTGTGATCTTAGCTTCCAAAATTACG
MGMT	O-6-methylguanine-DNA methyltransferase	NM_002412	cg14418963	37	10	131450762	F	Body	Body		-0.0453733	-22.0394	0.000602611	3.772	8.86e-07	AACTTTGTGATCAGCTCTGAAGTCTGCTCTCAGGCCTTTGAAAGCCTTCG
KDM4C	lysine (K)-specific demethylase 4C	BC053678	cg14438634	37	9	6836634	R	Body	Body		-0.0781409	-12.7974	0.00101354	2.173	0.0187	CGTGCATGCATGAGAAAACTATTTTTTACAAGGCAAGAAATCAAACACAA
ZNF654	zinc finger protein 654	NM_018293	cg14530983	37	3	88190749	F	Body	Body		-0.102099	-9.79442	0.00226073	2.869	1.99e-07	GCACCTGTAAAACAGAACACATCTGTTAATGCAAGTTTTATTGACATTCG
CCRL2	chemokine (C-C motif) receptor-like 2	NM_003965	cg14749678	37	3	46449636	F	Body	Body		-0.0417194	-23.9697	0.000353102	2.393	0.000117	GGGCTGAGAGTGCCTGGGCGTCATACTTGTCACATTGCTCTGCCTCATCG
FLVCR1	feline leukemia virus subgroup C cellular receptor 1	NM_014053	cg14912380	37	1	213068483	F	Body	Body		-0.0817959	-12.2256	0.0020823	2.558	2.42e-08	AATGTATAGCATCTGGCATATCCTATTATAACAGATCAACAGTTGACTCG
CLCF1	cardiotrophin-like cytokine factor 1	NM_013246	cg15453278	37	11	67134607	F	Body	Body		-0.0670297	-14.9188	0.000503442	2.793	7.72e-08	GGGGCCGGGGAAGTCTCCTCTGTTTACACCGTGTTGTGGTGTCTCTTGCG
AMPH	amphiphysin	NM_001635	cg16480803	37	7	38470088	R	Body	Body		-0.0714023	-14.0052	0.00194473	2.629	9.54e-05	AGCTGTGAGCAACTATGTTCAGAAAGCTGTTGTTTTGCATTTTGATATCG
IGFBP2	insulin-like growth factor binding protein 2, 36kDa	NM_000597	cg17033080	37	2	217508851	R	Body	Body	TRUE	-0.0547077	-18.279	0.000504507	2.313	4.32e-05	CGGGAGGGCTGGCTTTTTGAGCAAAGTCTCCCTCTGAGTCTTGACTGACA
CSF2	colony stimulating factor 2 (granulocyte-macrophage)	NM_000758	cg17566874	37	5	131411272	R	Body	Body		-0.0436421	-22.9137	0.00145195	9.355	1.05e-08	CCTTGACTCTGGCTGCCACTGGCAGAGCTATGCACTCCTTGGGGAACACG
UNC5B	unc-5 homolog B (C. elegans)	NM_170744	cg17668756	37	10	73020218	R	Body	Body	TRUE	-0.0487819	-20.4994	7.61e-05	16.2	2.96e-11	CGGAGGGCATTTTCATAAGGGCACTTTAATTAGGAAACAAGGCAGCTAGC
OPA1	optic atrophy 1 (autosomal dominant)	NM_130837	cg17791489	37	3	193339109	F	Body	Body	TRUE	-0.0542106	-18.4466	0.0014551	2.051	0.00332	CGGGGAGCTGAGGGGAACACAGATAGTTTGACTTCAGTCAGACAGAATAA
SIK1	salt-inducible kinase 1	NM_173354	cg17897313	37	21	44845971	F	Body	Body		-0.0617897	-16.1839	1.54e-05	4.188	9.07e-05	CCAGGGTCAGGGCCAGCAGAAGCCCCTCCGGGTGGGTTTTTACGACATCG
NR3C1	nuclear receptor subfamily 3, group C, member 1 (glucocorticoid receptor)	NM_001018077	cg18484679	37	5	142740314	R	Body	Body	TRUE	-0.0357085	-28.0045	0.00175406	3.249	2.66e-10	TAACACTTAATAAAGCATTAAGGACACTGTTCCACCTAATGATGTTTCCG
TFF1	trefoil factor 1	NM_003225	cg18729973	37	21	43785785	R	Body	Body		-0.0657789	-15.2024	0.000580522	3.427	0.000151	TAACGGCAAATAAGTTATTCAGCTCCCCACAGCTGGCAAAGTGCAAGTCG
SYNM	synemin, intermediate filament protein	NM_145728	cg18838433	37	15	99670476	R	Body	Body		-0.0663415	-15.0735	0.00101793	7.573	5.03e-08	CGGTTTCTGTCATGGAATCGCCTTGCAGAGAACCAGTGGCATCACTGGTG
DIAPH3	diaphanous-related formin 3	NM_030932	cg20592691	37	13	60447453	R	Body	Body	TRUE	-0.0658669	-15.1821	0.000189869	2.608	9.47e-06	AAATCCCTCTCAAAATACCCTGAATGCAAATGGAACAATGGATTTGTTCG
ALG13	ALG13, UDP-N-acetylglucosaminyltransferase subunit	NM_018466	cg21090723	37	X	110970253	R	Body	Body		-0.0277426	-36.0456	0.00135346	2.427	1.3e-06	CGGAGATGGATGCTGAGGATGAAAATGTTCATTAGACATAACATTGCCAG
RCL1	RNA terminal phosphate cyclase-like 1	NM_005772	cg21186778	37	9	4855519	F	Body	Body	TRUE	-0.0340393	-29.3778	0.00184283	2.158	3.96e-05	TCCTGTATCTACATGCACTTGAACAAAGTCTTGTCCAGTGCTGATCCACG
TLE3	transducin-like enhancer of split 3	NM_005078	cg21245875	37	15	70354825	R	Body	Body		-0.0971482	-10.2936	5.4e-06	2.296	5.01e-05	GGGAGAACAGCGAGCTCTTTCTTCTCATGCAGTCAGGCTGAAAACCCTCG
ATP11A	ATPase, class VI, type 11A	NM_015205	cg21786786	37	13	113365464	F	Body	Body		-0.111926	-8.93447	0.00133377	2.145	0.000505	AATGGCTCTGGCTCAGGAAGCATGATGAAAAGTCGGAAGAGCCGCACGCG
YAP1	Yes-associated protein 1	NM_006106	cg22104427	37	11	102033860	R	Body	Body	TRUE	-0.088941	-11.2434	0.00226237	2.722	3.01e-09	AACCCAAAAGAATATTTCTTATTCCCAGGGCAAGCATGGATTATTAAACG
BCAS3	breast carcinoma amplified sequence 3	NM_017679	cg22435132	37	17	59312558	F	Body	Body	TRUE	0.102058	9.79835	0.000465284	0.394	0.000173	TTTCAAAGAGACCAAATGAGTTGACACATTTAAAGTGCTTAGGACAGGCG
CDC73	cell division cycle 73	NM_024529	cg22817650	37	1	193191405	F	Body	Body	TRUE	-0.13523	-7.39481	0.000571032	2.135	0.00864	CGCTATGTAGAGGGTTCTCCTTACATCCGCCAAATACTATTCAGCACATG
PER2	period circadian clock 2	NM_022817	cg22879834	37	2	239169591	F	Body	Body		-0.0621366	-16.0936	0.00241348	7.356	9.25e-09	CGGGCTGGGGAGACAGCAGACAGCGCTACAGACACAGCCAGGGCTGCTGA
SIK3	SIK family kinase 3	NM_025164	cg23684410	37	11	116897558	R	Body	Body	TRUE	-0.0655957	-15.2449	0.000102718	2.085	0.0047	CGGGTGAAACAATGATGACTCATTTTAGATTGATGAAAGGGACAGCTTAG
TTLL5	tubulin tyrosine ligase-like family, member 5	NM_015072	cg23920251	37	14	76219282	R	Body	Body	TRUE	-0.0500101	-19.996	0.0016708	2.495	0.00169	AGGTCCTACCTCGAGCATAAGACCTCAATGAACTATATGCTGGCAACACG
MPRIP	myosin phosphatase Rho interacting protein	ENST00000395807	cg24204477	37	17	16968059	R	Body	Body	TRUE	-0.0309875	-32.2711	0.001603	2.428	2.77e-05	TCCAGGTTGTTGCTTGGATCAGTAGTTTGCTCCTTTTTATTGCTGACTCG
FNIP2	folliculin interacting protein 2	NM_020840	cg24473518	37	4	159816397	F	Body	Body	TRUE	-0.0911921	-10.9659	0.0012855	2.079	0.000867	CCAATAGCTCAGATTATTCTGGCCCAGTACATTTCCAGAGGAGACTGACG
ANGPT1	angiopoietin 1	NM_001146	cg24810735	37	8	108441547	R	Body	Body	TRUE	-0.0531057	-18.8304	0.0022959	2.252	0.000205	CTCATAAGATGAGACCGGTTACTGCAGGCGAGTGAAACCCGGACTTCCCG
SLC7A11	solute carrier family 7 (anionic amino acid transporter light chain, xc- system), member 11	NM_014331	cg24869834	37	4	139146513	F	Body	Body	TRUE	-0.0767791	-13.0244	0.00214694	2.884	1.58e-06	CGAAGAAATATTTCAAAGGAGTAATTATGAGAATGATCAAAAAGGCCAAA
TBC1D4	TBC1 domain family, member 4	NM_014832	cg25275750	37	13	75918697	F	Body	Body	TRUE	-0.100747	-9.92585	0.00165162	3.134	0.000593	CGGTCTATCTCGGTGATACTCAGCATCACTTTTCAGATTCACATTCTGAG
RFTN2	raftlin family member 2	NM_144629	cg25517103	37	2	198506530	R	Body	Body	TRUE	0.0885438	11.2938	0.00201251	0.46	0.00271	CGGGTATGAACAAGAGCCATAGATGAATTGCCAAATATTATTTTTGAGCG
ZNF704	zinc finger protein 704	NM_001033723	cg25520872	37	8	81599569	R	Body	Body		-0.0275069	-36.3545	2.57e-05	4.567	0.000261	CGGCTGACAGCTTCAAGCCCTTCCGCAGCCCCGCGCAGCCAGACGACGGC
HR	hair growth associated	NM_005144	cg26344606	37	8	21976510	F	Body	Body		-0.0559099	-17.8859	0.000154153	12.62	5.41e-05	CGTGCCACACAGTGCTGACCTGGCTGCCCGGAGACCAGAGCCCCTCCCCG
NID2	nidogen 2 (osteonidogen)	NM_007361	cg26419287	37	14	52482697	R	Body	Body	TRUE	-0.0588506	-16.9922	0.000161292	2.245	0.000117	AAATGGTTCTTCCACAGCCCAGTTTCCAGAATTGCTTTAGCCACCCTGCG
ABCE1	ATP-binding cassette, sub-family E (OABP), member 1	NM_002940	cg26690672	37	4	146031291	F	Body	Body		-0.0805681	-12.4119	0.00100536	2.324	0.00109	AGGTCATCTTCTAGAATCTTTGTAAAGTAATTTTGTAATTCAGATCCACG
RAB11FIP1	RAB11 family interacting protein 1 (class I)	NM_001002814	cg26974427	37	8	37727552	R	Body	Body	TRUE	-0.143287	-6.979	0.00119973	2.241	6.09e-06	AAAAGAAAATACCTGACCTGAATGGGCCAGACTGGGTGTGGTGGTTCACG
STXBP5	syntaxin binding protein 5 (tomosyn)	NM_001127715	cg27067922	37	6	147643548	R	Body	Body	TRUE	-0.0877085	-11.4014	0.000324689	2.244	0.000178	CGAATTGAACTACAGTTCACTTCTGGCTGGTCAAGGTTTGCAAGGCAATG
DOCK5	dedicator of cytokinesis 5	NM_024940	cg27185978	37	8	25095288	R	Body	Body	TRUE	-0.040101	-24.937	0.00141528	2.033	0.00396	CGGCAGGCACCACCACAATCTCTTGTTTTGACTGAGGAAATTAAACAAGA
MYB	v-myb avian myeloblastosis viral oncogene homolog	NM_005375	cg27434890	37	6	135517041	F	Body	Body		-0.0620564	-16.1144	0.00226581	8.099	7.8e-06	CGCCTCGCCAGCAAGGTGCATGATCGTCCACCAGGGCACCATTCTGGATA
CPS1	carbamoyl-phosphate synthase 1, mitochondrial	NM_001875	ch.2.4215183F	36	2	211401919	F	Body	Body		0.0856611	11.6739	0.000392964	0.28	0.000553	CAGCACATTGCTAAGGGTTAATTTTCAAACCAATGAGTGGTGAGAAGGGC
CLDN23	claudin 23	NM_194284	cg00074818	37	8	8560427	R	1stExon	Island		-0.0305417	-32.7421	0.000513011	25.6	9.56e-06	CGCCCAGCAGCAGGAGGCAGCTGCCCAGGTAGCCCAGGACCAGGCTGTAG
SRF	serum response factor (c-fos serum response element-binding transcription factor)	NM_003131	cg00984602	37	6	43139692	R	1stExon	Island		-0.00422507	-236.682	0.00090968	2.174	0.00182	GAGTCGGGCGAGGAGGAGGAGCTGGGCGCCGAGCGGCGCGGCCTGAAGCG
AMIGO3	adhesion molecule with Ig-like domain 3	NM_198722	cg01204305	37	3	49756497	R	1stExon	Island		-0.0913803	-10.9433	4.99e-05	4.41	7.85e-08	CTCGTCCAAGTGCACCAAGCGGTTATTGAACAGAAGCAGCTTCTCCAGCG
C3orf58	chromosome 3 open reading frame 58	NM_173552	cg01390591	37	3	143690991	R	1stExon	Island		-0.00265399	-376.791	0.00195287	2.161	0.0167	CGGGCTGCGACTTCTCCCAGTCACTAGTCTCCACAACTCTCGAGCTCCCT
PPP2CA	protein phosphatase 2, catalytic subunit, alpha isozyme	NM_002715	cg01460557	37	5	133561498	F	1stExon	Island		-0.0417821	-23.9337	0.00109217	2.362	4.09e-07	CGAGAAGGTGTTCACCAAGGAGCTGGACCAGTGGATCGAGCAGCTGAACG
EID3	EP300 interacting inhibitor of differentiation 3	NM_001008394	cg01848457	37	12	104697983	F	1stExon	Island	TRUE	-0.0630745	-15.8543	0.0014011	5.893	0.000964	AACTGCTTTGCCTTTTCTTTACCCAAATCAGAAGCCATAACAAGAAACCG
NCAPD3	non-SMC condensin II complex, subunit D3	NM_015261	cg02461956	37	11	134093940	R	1stExon	Island		-0.0467384	-21.3957	0.000185336	2.632	0.0107	TTCCTGTGGACCAATCACAACGTACAGAATTTCCCACTGGCCAACCACCG
IRS2	insulin receptor substrate 2	NM_003749	cg03337886	37	13	110436740	F	1stExon	Island		-0.062064	-16.1124	5.33e-05	4.868	2.96e-06	CGGCCACAGTGGCTCAGGGGCCTGTCCATGGTCATGTACCCGTAGAACTC
VEGFA	vascular endothelial growth factor A	NM_001025366	cg03775871	37	6	43738440	F	1stExon	Island		-0.00366475	-272.87	0.000989666	4.32	7.3e-07	CGCGCTGACGGACAGACAGACAGACACCGCCCCCAGCCCCAGCTACCACC
TDG	thymine-DNA glycosylase	NM_003211	cg03923277	37	12	104359732	R	1stExon	Island		-0.0355868	-28.1003	0.000598316	2.763	0.00419	GTCTGGGTACTGCCAGCCATCGGGCCCAGGTCTCTGGGGTTGTCTTACCG
RAPGEF6	Rap guanine nucleotide exchange factor (GEF) 6	NM_016340	cg05052335	37	5	130970657	R	1stExon	Island		-0.0131395	-76.1064	0.000333802	2.889	0.000788	CTGTCTACTGGACTGTGAGACGCACATAAAGGTCAACCAGCCTCACCTCG
HIST1H2BH	histone cluster 1, H2bh	NM_003524	cg05457344	37	6	26252100	R	1stExon	Island		-0.0306078	-32.6714	0.00206671	2.646	6.48e-08	AGCCATGGGGATCATGAATTCCTTTGTCAACGATATCTTCGAGCGCATCG
HMGB3	high mobility group box 3	NM_005342	cg05905814	37	X	150151809	F	1stExon	Island		-0.079508	-12.5774	0.00245834	2.614	3.6e-05	GAGACGTACCTGTATTGTTCGCTAGTCTGGGCAGCGCAGGGCACGACGCG
CXCL3	chemokine (C-X-C motif) ligand 3	NM_002090	cg07318073	37	4	74904359	R	1stExon	Island		-0.0371475	-26.9197	0.00039269	4.005	5.48e-07	CGCACAGCTTCCCGACGCGTCTGCTGAGCCCCATGGCCCACGCCACGCTC
DKK1	dickkopf WNT signaling pathway inhibitor 1	NM_012242	cg07684796	37	10	54074209	R	1stExon	Island		0.0123336	81.0793	0.00205324	0.477	5.11e-06	CGCCCAGAGCCATCATCTCAGAAGGACTCAAGAGGGAGAAAGAAAGAGAA
OSBPL8	oxysterol binding protein-like 8	NM_020841	cg07818830	37	12	76953439	F	1stExon	Island		-0.0226754	-44.1007	0.00070597	2.529	0.0349	CGGCTTGCTACCGGCAGCGGCTACTGCGGCGTCCAAAGCTAACACTACAG
SNIP1	Smad nuclear interacting protein 1	NM_024700	cg08113093	37	1	38019707	F	1stExon	Island		-0.00733116	-136.404	4.57e-05	2.004	0.00647	GGGGGTGGTGGTGAAGCAGGAGCGTCTCAGCCCAGAAGTCGCACCTCCCG
C4orf46	chromosome 4 open reading frame 46	NM_001008393	cg08290995	37	4	159593107	F	1stExon	Island		-0.00764658	-130.777	0.000859348	2.748	2.79e-07	TGCCTAAGGTGAATTGACTCATATGATTGGCTGTCCCGAAAAATGAAACG
RRP12	ribosomal RNA processing 12 homolog (S. cerevisiae)	NM_015179	cg10014190	37	10	99160939	R	1stExon	Island		-0.00850689	-117.552	0.00245656	3.32	9.07e-08	CGCTGGAAGAAAGGCCACAGCAGCGACAGCAACCCCGCCATCTGCCGCCA
TPX2	TPX2, microtubule-associated	NM_012112	cg10480038	37	20	30327108	R	1stExon	Island		-0.00684356	-146.123	0.00157623	3.196	3.49e-07	CGCCGCGGGACTCATTCAGTATCGTTGAAATTTTGAACCCAGGCAGCCTA
UBE2C	ubiquitin-conjugating enzyme E2C	NM_181801	cg10985576	37	20	44441519	R	1stExon	Island		-0.021248	-47.0633	0.000726532	3.542	1.19e-05	ATGCCCTAGGCATTGGTACCCAGAGCAAAGATTTCTAGGACCACCCCCCG
PDZD8	PDZ domain containing 8	NM_173791	cg11061177	37	10	119134785	F	1stExon	Island		-0.0721674	-13.8567	0.000151012	2.387	0.000568	CCCGATGTCCTCAAAATGGAGGCAGCGGGGGCGGCGGCGTGAAGAAAGCG
ADAMTS5	ADAM metallopeptidase with thrombospondin type 1 motif, 5	NM_007038	cg12078031	37	21	28337869	R	1stExon	Island	TRUE	-0.038087	-26.2557	0.00121641	6.068	0.000688	ATGGAGGCCAGGGTCAGCAGGTAATGCTGCAGGCCCCGGCCATACAACCG
NDN	necdin, melanoma antigen (MAGE) family member	NM_002487	cg12532169	37	15	23932370	R	1stExon	Island		-0.064057	-15.6111	0.000204133	3.235	2.74e-08	CTGCAAAGTTAGGGTCGCTCAGATCCTTACTTTGTTCTGACATGTCTGCG
NEK2	NIMA-related kinase 2	NM_002497	cg12820481	37	1	211848760	F	1stExon	Island		-0.0593241	-16.8566	0.000334961	5.865	0.000901	CGGCCGTAGGAGCCTGTGCCAATGGTGTACAACACTTCATAGTCCTCAGC
CKS2	CDC28 protein kinase regulatory subunit 2	NM_001827	cg13651859	37	9	91926249	R	1stExon	Island		-0.0544478	-18.3662	0.00102341	2.32	0.000299	CGTCGAAGTACTTGTCCGAGTAGTAGATCTGCTTGTGGGCCATCCTGCTG
EYA3	eyes absent homolog 3 (Drosophila)	NM_001990	cg13690588	37	1	28415118	R	1stExon	Island		-0.0203477	-49.1456	0.000243903	2.033	1.71e-06	CGCCGCGGTTTCCTCCGCTCGATTGGTTCTACTGTGGGTCTGGACTGATC
ILF3	interleukin enhancer binding factor 3, 90kDa	NM_004516	cg16714605	37	19	10765132	R	1stExon	Island		-0.0529843	-18.8735	5.87e-05	2.264	7.89e-07	CGCCGCCGCCGCCCTCCTGCCACAGCCCGCCGGGGTCTGCCCCCAAAAGC
SNTB1	syntrophin, beta 1 (dystrophin-associated protein A1, 59kDa, basic component 1)	NM_021021	cg16875032	37	8	121823916	F	1stExon	Island		-0.0794333	-12.5892	0.000124896	2.09	1.88e-05	CGCCGCAGCGCCCTCCTCGCTGCTCAGAACCAGGGCGTCCTCGCTCAAGT
DDHD1	DDHD domain containing 1	NM_030637	cg18169128	37	14	53619322	R	1stExon	Island		-0.0232044	-43.0953	0.00022913	2.122	0.00647	GGGCTTCCAGGTCTTCTTGTCCTCCTTGTAGAACCAGCGTACCTCCTCCG
ARL8B	ADP-ribosylation factor-like 8B	NM_018184	cg18604876	37	3	5164258	R	1stExon	Island		-0.0415368	-24.075	0.00258287	2.23	0.00173	GATGGAGCTGACGCTCGTGGGGCTGCAGTACTCGGGCAAGACCACCTTCG
HIST1H2BI	histone cluster 1, H2bi	NM_003525	cg21610164	37	6	26273401	R	1stExon	Island		-0.0258004	-38.7591	2.81e-05	2.005	0.0003	CCCCGACACCGGCATCTCGTCCAAGGCTATGGGGATTATGAACTCCTTCG
TRIM13	tripartite motif containing 13	NM_213590	cg22825979	37	13	50571203	R	1stExon	Island		-0.0186923	-53.498	0.000458765	2.058	1.34e-06	GGGGCGGAGCTAGCCGGAGCCGCGAGTCCATTTTGGGGCTGTGCTTGGCG
CKAP2	cytoskeleton associated protein 2	NM_018204	cg23776532	37	13	53029591	R	1stExon	Island		-0.00827505	-120.845	0.00192619	3.053	2.57e-06	CGGCGCGGCTGCCGTCTCCGCCCATTGGTTCCTGCGTGAATTGAATAAGC
HIST1H3G	histone cluster 1, H3g	NM_003534	cg23944005	37	6	26271395	R	1stExon	Island		-0.0632527	-15.8096	0.000621576	2.389	0.000365	GCGGAACTCTGAAAGCGCAGATCTGTCTTGAAGTCCTGAGCGATTTCTCG
MAPK13	mitogen-activated protein kinase 13	NM_002754	cg24155668	37	6	36098398	F	1stExon	Island		-0.048198	-20.7477	0.00150516	2.377	1.68e-08	GCGTCGGGGACACGTAGGTCTTGGGCAGCTCCCAGGCTGTCTTGTTGACG
SCML1	sex comb on midleg-like 1 (Drosophila)	NM_001037540	cg26367537	37	X	17755775	F	1stExon	Island		-0.0548863	-18.2195	5.78e-05	2.281	0.0221	AGGAAAAAGTACGACTGGACAGACCTATTTTAGTGACAGAGCCTGTCACG
SLC1A4	solute carrier family 1 (glutamate/neutral amino acid transporter), member 4	NM_003038	cg26748578	37	2	65217211	F	1stExon	Island		-0.0763874	-13.0912	0.000390104	4.406	4.61e-06	AGGAGGCCCCGAGTCCTCCAGCCCCAGGTCGCTGGACTGAAGGGTCTGCG
DOT1L	DOT1-like histone H3K79 methyltransferase	NM_032482	cg00455546	37	19	2229807	R	3'UTR	Island		-0.0331949	-30.1251	0.00188149	2.149	3.67e-05	CTCTTCCCGCTGTGCCCTTCTGCAGGTAACTAGGATTTCTACCTCAACCG
SOCS1	suppressor of cytokine signaling 1	NM_003745	cg10784813	37	16	11348678	R	3'UTR	Island		-0.0465618	-21.4768	0.000724709	4.358	2.5e-06	CGCAGCATTAACTGGGATGCCGTGTTATTTTGTTATTACTTGCCTGGAAC
RASL10A	RAS-like, family 10, member A	NM_006477	cg15383276	37	22	29709282	R	3'UTR	Island		-0.0540737	-18.4933	0.000118097	9.351	2.2e-07	CGGACAGTGCCATCCATGGGCCCCACCTTGTGACTGGGACAATCAGGGAC
COX6B2	cytochrome c oxidase subunit VIb polypeptide 2 (testis)	NM_144613	cg17874421	37	19	55864234	R	3'UTR	Island		-0.102538	-9.75248	0.0011622	2.02	0.000648	AATGATTCCGAGGGAGCTCTGAGCGTCCTCTGGGTGCTGGCAGTCTGGCG
LMNB2	lamin B2	NM_032737	cg26149485	37	19	2428350	R	3'UTR	Island		-0.0640124	-15.622	4.17e-05	2.037	0.0124	GCCAGCCCCAGCTGCAGCCCAGCTCCGTTTTTGCAGGTTGTGCTGTGACG
SKA1	spindle and kinetochore associated complex subunit 1	NM_001039535	cg01313966	37	18	47901443	F	5'UTR	Island		-0.0269657	-37.0841	0.000117377	6.847	2.09e-07	AAGCCCAGGATGGTGAGACGGGACTCTGTAAGCAAAATTCAAACCGCCCG
BCOR	BCL6 corepressor	NM_017745	cg01522249	37	X	39951640	F	5'UTR	Island		-0.198968	-5.02593	0.00200647	2.827	0.00934	CGTGCGCGTCTGGGGTCACCGAGGCGCCTGCTAATCCACCCAACACAGGC
PODXL	podocalyxin-like	NM_001018111	cg02051077	37	7	131241343	R	5'UTR	Island		-0.0822656	-12.1557	0.000161579	2.161	2.29e-07	CGCCGCCGCCGCTCCTCTGCCACTGGCTCTGCGCCCCAGCCCGGCTCTGC
LPPR1	lipid phosphate phosphatase-related protein type 1	NM_207299	cg02391906	37	9	103792059	R	5'UTR	Island		-0.0447202	-22.3613	0.000145579	2.481	7.86e-07	GGATAAATGATGAGTTACTGACAGGCTTGCCATAATCACCTCCTAGAACG
HPSE	heparanase	NM_006665	cg04599631	37	4	84256200	F	5'UTR	Island	TRUE	-0.0047507	-210.495	7.09e-05	2.901	0.000117	CTTGGATCCCGGCCATCTCCGCACCCTTCAAGTGGGTGTGGGTGATTTCG
SIAH1	siah E3 ubiquitin protein ligase 1	NM_003031	cg05311589	37	16	48399731	R	5'UTR	Island		-0.0134102	-74.5701	0.00235494	2.495	0.0106	TTCTCCAGATTCACTGGGTAGGGTCCTGCCCAGCTCCAGTGGAGGCCACG
ATF3	activating transcription factor 3	NM_001040619	cg05880577	37	1	212783085	F	5'UTR	Island		-0.0437716	-22.8459	0.000269409	6.606	3.82e-07	ACCACAAAGCCATTCTCTCAAATATCTGCACAAGTGGCTCCACACCCTCG
RAI2	retinoic acid induced 2	NM_021785	cg06102971	37	X	17878442	R	5'UTR	Island		-0.0684491	-14.6094	0.000887327	5.019	4.1e-11	CGGGGTTGGGGTTGTGCTCTGTGTGTTTGCTTGTTTGCCATTTAAAGCCC
SLC2A14	solute carrier family 2 (facilitated glucose transporter), member 14	NM_001286233	cg06645921	37	12	8025394	F	5'UTR	Island		-0.0744409	-13.4335	0.00111603	3.161	2.1e-06	GCGAAGCCGCGGGGCCCAACCGCAGTCGCGGGGTCTGGGAGGTGGGTGCG
TDRD3	tudor domain containing 3	NM_030794	cg07668623	37	13	60971344	F	5'UTR	Island		-0.0194922	-51.3026	0.000221396	2.274	0.0339	CGCCGGCCGCACTGAGCATGCCCAGTTGCAGAGCCGACCAGAGGAGTTTT
FGF13	fibroblast growth factor 13	NM_004114	cg07768177	37	X	138286760	R	5'UTR	Island		-0.0688451	-14.5254	0.00025159	4.862	0.00104	CGGGGGAAAGCAGCCTGCCAGTGCGCGGGCAGCCCACCCAGGCAACTCCC
FAM110A	family with sequence similarity 110, member A	NM_001042353	cg08042538	37	20	821854	R	5'UTR	Island		-0.061643	-16.2224	0.00118439	3.288	0.000113	GGCCCCTGCCTGGCTTTCCTTACCCTTTTCGGGTAGTACCTGGACCAGCG
KANK1	KN motif and ankyrin repeat domains 1	NM_001256877	cg08677535	37	9	505721	F	5'UTR	Island		-0.034162	-29.2723	7.66e-05	2.167	0.0027	CGGAGGGTCAGCCCATCTTATTAAATAGTGGATTCTATTAGACCCTGATA
BCL2L11	BCL2-like 11 (apoptosis facilitator)	NM_207002	cg13092766	37	2	111879378	F	5'UTR	Island		-0.100031	-9.9969	0.00123716	2.575	6.5e-05	CGGCCTGTGCCATCCGCACGATTCCCTGGCAGCGAGAAATCTAGGTCCTC
CDK1	cyclin-dependent kinase 1	NM_001786	cg13554667	37	10	62538283	R	5'UTR	Island		-0.0191967	-52.0923	7.91e-05	5.988	4.95e-05	CGCGTCGCTCTCCGCTCAATTTCCAAGAGCCAGCTTTGAAGCCAAGTGCG
PMEPA1	prostate transmembrane protein, androgen induced 1	NM_020182	cg13838969	37	20	56283964	F	5'UTR	Island		-0.0128759	-77.6645	0.00160591	2.562	3.49e-05	GCTCTGTCTGGGTCTTCGGCGTCTCTCGGGGTGTCTGGGGGTCTGAGTCG
ASF1B	anti-silencing function 1B histone chaperone	NM_018154	cg14203758	37	19	14247374	R	5'UTR	Island		-0.0117047	-85.4358	0.000774431	3.32	4.79e-06	CGGGAGTGGACCTGGTCAGCCCTACCCCACTGACCCCACCGGACCCAGGC
SGMS2	sphingomyelin synthase 2	NM_152621	cg16217610	37	4	108746323	F	5'UTR	Island		-0.0351595	-28.4418	0.00172227	3.941	9.97e-08	CGGCAGCGGGCTCCATCCCCTGGCAAATCCCCTTCCCGGGAGCAAGTGCC
AADAT	aminoadipate aminotransferase	NM_016228	cg18729308	37	4	171011257	F	5'UTR	Island		-0.0139912	-71.4735	0.00237439	2.485	0.000515	CGCGAGGCGCTTGCAGCCCCAGGCCAATGACTCTTGACCTCGCCGCTGGG
MOAP1	modulator of apoptosis 1	NM_022151	cg19600328	37	14	93651164	R	5'UTR	Island		-0.0110509	-90.4904	0.00232688	2.66	0.0113	TGAGGAGCGCTGAGTCGCCAGACCCAGAGAGCCACCCACCTGGAGGGACG
CDCA4	cell division cycle associated 4	NM_017955	cg20916237	37	14	105487215	F	5'UTR	Island		-0.0339626	-29.4442	0.00104405	2.487	0.000307	CGCCCCGGACCCAGCGCCAGGAGCCACAGACTCCGCGCACCGCCCCCAGG
UPP1	uridine phosphorylase 1	NM_001287428	cg22622937	37	7	48129444	F	5'UTR	Island		-0.0359621	-27.8071	2.69e-05	2.651	1.38e-08	CGGGAACCCCTAGAACTATGCTGGGAGCCCCAGATAAGAGGAAGGAGATG
CXXC5	CXXC finger protein 5	NM_016463	cg22741735	37	5	139056804	R	5'UTR	Island	TRUE	-0.0859248	-11.6381	0.00139228	2.291	3.77e-08	CGGCGGCGGGCGCATCCATCATCGGCCCTGCCAGGAACACATCCAGCCCC
GRB10	growth factor receptor-bound protein 10	NM_001001555	cg23742152	37	7	50849805	F	5'UTR	Island		-0.169655	-5.89431	0.000243839	3.717	9.81e-06	CGCTCGAATCGTCGTCACGGGTTTCCGTGGGTACAGTTATTACTCGTTAC
ZDHHC23	zinc finger, DHHC-type containing 23	NM_173570	cg24617466	37	3	113667389	F	5'UTR	Island		-0.0355635	-28.1187	0.000421265	5.03	6.5e-08	TCTTGGAGGTCTGAGCTGCCTTCACCGCCCCTTCCCAGCCTGGGCAGGCG
RRM1	ribonucleotide reductase M1	NM_001033	cg25025968	37	11	4116056	F	5'UTR	Island		-0.0420365	-23.7889	0.00081188	2.185	0.000878	GACAGCACTTTCTTCAGAGCAGAGGCGCAACAATCCAAATCCCCTTCCCG
MEST	mesoderm specific transcript	NM_002402	cg25519926	37	7	130132360	F	5'UTR	Island		-0.109298	-9.1493	0.000945792	3.001	4.07e-07	TCTAGAAATCCTAACCCAAGGAGGTCCCGCGTTCTGAACATTCCATTGCG
TOP2A	topoisomerase (DNA) II alpha 170kDa	NM_001067	cg26164164	37	17	38574080	F	5'UTR	Island		-0.0047671	-209.771	0.000704737	4.985	0.00144	AGAAGCGGCTTGGTCGGGGGTGGTCTCGTGGGGTCCTGCCTGTTTAGTCG
DDN	dendrin	NM_015086	cg00757327	37	12	49390906	F	Body	Island		-0.0331208	-30.1925	0.000620868	2.355	7.03e-06	CGGCTCTGCCCTGGGCTCCCGAAGCTGCTGGGCCTAAGGCTTGGTGCTCT
BAIAP2	BAI1-associated protein 2	NM_017450	cg01976960	37	17	79051921	R	Body	Island		-0.101031	-9.89795	0.000345857	2.362	1.66e-06	GATCTGGGCACTCTGGGTGCCGGTGCGGGTGTCGTCTTGGGTGGGAGCCG
TFDP1	transcription factor Dp-1	NM_007111	cg02101742	37	13	114292869	R	Body	Island		-0.159859	-6.25551	0.000400609	3.035	2.47e-05	CGTGCGCTGTGATTGCAGACGCGTTCTGAAAAATACGTGTACCATAATCA
ING1	inhibitor of growth family, member 1	NM_198219	cg02656441	37	13	111367915	R	Body	Island		-0.0128053	-78.0927	0.00191206	3.682	1.69e-08	CAATAACTGGTATGGGTCTGTGTTTCCGCTGTCTTCTTTTTTCTTTTTCG
NCAPG	non-SMC condensin I complex, subunit G	NM_022346	cg03604819	37	4	17813007	R	Body	Island		-0.0276317	-36.1903	0.000270512	3.666	3.4e-05	CGGAGGCTTTCTGGCCTGGGCCCAGGCGACCTCGGGTAAGTCCCTGACTT
PHF19	PHD finger protein 19	NM_001009936	cg03808351	37	9	123631620	F	Body	Island	TRUE	-0.10543	-9.48497	0.000193097	2.267	5.94e-05	CGAGGGCCCCAGTCAACCACCAGGTCCGGGTGGACCACGCGAGTCAGCAC
NAA20	N(alpha)-acetyltransferase 20, NatB catalytic subunit	NM_016100	cg04090022	37	20	19998558	F	Body	Island		-0.0296688	-33.7054	0.00160888	2.025	0.0101	CGGAAGCTGGTCAGCAGCTGTTGGGATGTGTACATCGTGAAGCCCACCTG
ZFPM1	zinc finger protein, FOG family member 1	NM_153813	cg05012676	37	16	88564366	R	Body	Island		-0.0938225	-10.6584	0.00165851	2.412	0.000169	CGCCTATCGGCCCATCTCCCTGCTGTCCATCAGGCCGGGCCCCCGCCTCA
ZCCHC14	zinc finger, CCHC domain containing 14	NM_015144	cg05783134	37	16	87511403	F	Body	Island		-0.138515	-7.21943	0.000397734	2.78	0.000231	GACTCGGGAGCGATGCGTGGAGGCGTGTGAGTGTTCCCCAGGTGTGTGCG
ZNF251	zinc finger protein 251	NM_138367	cg06513375	37	8	145955988	F	Body	Island		0.0554931	18.0203	0.000749742	0.379	0.00648	CGGGGCAGGGCCCTGCCAAGGGACCCCCAACAAACACGACTGAAACTCAG
DLX2	distal-less homeobox 2	NM_004405	cg08351004	37	2	172965650	F	Body	Island		-0.103719	-9.64144	4.35e-05	148.7	5.78e-09	CTAATGCTCAGGTCTTTTTCCTCAAAGGTCAAAATCTGGTTCCAGAACCG
CCDC59	coiled-coil domain containing 59	NM_014167	cg08987606	37	12	82752080	R	Body	Island		-0.0474447	-21.0772	0.000187291	2.191	3.97e-07	CGGGTACAGGAATAAGAATGTGAGACAGAAGACATGGCGGCCTAACCACC
FAM46A	family with sequence similarity 46, member A	NM_017633	cg11075693	37	6	82461261	F	Body	Island		-0.0626726	-15.9559	0.00222671	3.244	9.61e-07	CGGCCCAGACTGGGTCAGGACCCAAGTGCATCTCGGGTGGTGTTACCTTG
FOS	FBJ murine osteosarcoma viral oncogene homolog	NM_005252	cg12061886	37	14	75746793	R	Body	Island		-0.0500864	-19.9655	3.38e-05	18.44	1.57e-05	CGGCCTCCTGTCATGGTCTTCACAACGCCAGCCCTGGAGTAAGCCCCAGC
TRIP13	thyroid hormone receptor interactor 13	NM_004237	cg12705693	37	5	912860	F	Body	Island		-0.0689378	-14.5058	9.58e-05	3.215	3.12e-08	AGAAACACAAGCATGGGGCAGGTCCCTGCTAGCCTGACTCACACACACCG
EGR4	early growth response 4	NM_001965	cg13481359	37	2	73520043	R	Body	Island		-0.0312532	-31.9967	0.00229375	6.16	0.00255	CGGGCCCCTGCTGAATCAGAATGTGCAAAAGGCACTTTGTGTATATCCGT
SAT1	spermidine/spermine N1-acetyltransferase 1	ENST00000379253	cg13571540	37	X	23801624	R	Body	Island		-0.0295825	-33.8038	0.000350496	11.41	6.99e-05	CGGCCGAGACCTCAAGACGTGAATCACCCCACTCTGGGAAACGGAGCCAC
H3F3B	H3 histone, family 3B (H3.3B)	NM_005324	cg14235568	37	17	73774897	F	Body	Island		-0.0638056	-15.6726	0.000674665	3.908	7.95e-09	CGCACCGATGGCTGCGCTCTGAAACCTCAGGTCGGTTTTGAAATCCTGCG
SOX17	SRY (sex determining region Y)-box 17	NM_022454	cg15377283	37	8	55371369	R	Body	Island	TRUE	-0.0768263	-13.0164	2.45e-05	3.458	1.14e-05	TGTCCATCCCTCGACCCCTTCCCTAGTTAGGTGTCCTTTTCTGTTTTTCG
HS6ST2	heparan sulfate 6-O-sulfotransferase 2	NM_001077188	cg17355765	37	X	132091269	F	Body	Island		-0.0592263	-16.8844	3.38e-05	2.851	8.29e-07	GCTAGCTTTGGTGATGCTCTTCCTATTTGCCGTGATCGTCCTCCAATACG
BIRC5	baculoviral IAP repeat containing 5	NM_001012271	cg17515702	37	17	76210520	F	Body	Island		-0.0231407	-43.2139	0.00138067	3.581	6.08e-05	CGGCCTCCTGGGGTCCCCCACGCCCGCCTTGCCCTGTCCCTAGCGAGGCC
PLEK2	pleckstrin 2	NM_016445	cg17641252	37	14	67878535	F	Body	Island		-0.0907699	-11.0169	0.000184753	2.222	3.64e-07	CGCTGAGCCACCGCTTACCCCGCGTCCCCTCGGACATGCAGCTCTGCCCA
UBTF	upstream binding transcription factor, RNA polymerase I	NM_001076683	cg18941614	37	17	42287715	F	Body	Island	TRUE	-0.0245678	-40.7037	0.000118854	4.026	2.63e-10	CGCTCTGTTGCCAGATCTCCTCAGCTCTTTTGGGGGACTCGGGCAGCTTG
ITPKA	inositol-trisphosphate 3-kinase A	NM_002220	cg20272979	37	15	41787780	R	Body	Island		-0.0759217	-13.1715	0.00170639	3.846	1.69e-05	GAAAAGCCTCACAGAGCAGGAACACCCCCCGCCGCCAGGTGCTGGGTGCG
KDM3A	lysine (K)-specific demethylase 3A	NM_018433	cg20951334	37	2	86669446	F	Body	Island		-0.0115382	-86.6686	0.000512785	3.525	1.79e-05	CGGAGACCAGAAAGTTGGCATATGATCTGAAGGTGCAGGAAGCTAGATCT
ARHGAP20	Rho GTPase activating protein 20	NM_020809	cg21406100	37	11	110582247	F	Body	Island		-0.030937	-32.3238	0.000218184	3.167	0.00142	GGCAGATATGGGGAGTACTGCCCCCCACACCAGGGTCCTGGATGATTCCG
ERO1LB	ERO1-like beta (S. cerevisiae)	NM_019891	cg21767703	37	1	236444768	R	Body	Island		-0.0431796	-23.1591	0.000892013	2.334	8.88e-05	CGGGTAATGGCAGTCAAAAGAGGAAGATGGTGACGGTCCCCCTGAGCTGT
SLC7A1	solute carrier family 7 (cationic amino acid transporter, y+ system), member 1	NM_003045	cg25493901	37	13	30088729	R	Body	Island		-0.0601948	-16.6127	0.000940145	4.58	3.88e-07	CGGCCCGCAGGCTTCATCATCTACTTTGGCTATGGCCTGTGGCACAGCGA
MYBL1	v-myb avian myeloblastosis viral oncogene homolog-like 1	NM_001080416	cg00021237	37	8	67525849	F	TSS1500	Island		-0.0654696	-15.2743	0.000683947	2.022	1.14e-05	CGGGCGGTGGAGAAGTCCAGTTGCCCCAAAATTCTTAGGGTGAGCGAACC
CAMSAP1	calmodulin regulated spectrin-associated protein 1	NM_015447	cg00022024	37	9	138800324	F	TSS1500	Island		-0.0818689	-12.2147	1.22e-06	2.23	0.00812	TGACGGACTGCCTGGGTCCTCTGGGCACCTGGCATTTCATACATGTTCCG
HOXC9	homeobox C9	NM_006897	cg02568274	37	12	54393565	F	TSS1500	Island		-0.0393551	-25.4097	0.000569521	4.039	1.11e-05	CGGGGACTGGCATTTTCACCCCATTAAAAAATCCTCATGGTTGGGGGGAG
KIF22	kinesin family member 22	NM_007317	cg03462115	37	16	29801729	F	TSS1500	Island		-0.015724	-63.597	0.000124969	2.362	0.000141	TCCCTTTCCCTTTACTTTCTGCAGTTTCTTGCCTCCGTGGGTGGTTGGCG
ANKRD10	ankyrin repeat domain 10	NM_001286721	cg03859684	37	13	111568271	F	TSS1500	Island		-0.00901094	-110.976	0.00143672	3.082	3.28e-07	CTGTCCTGCTCTGTAAGGAACTAGGGCTTGCTGATTCCCAGATTTTAACG
CHSY3	chondroitin sulfate synthase 3	NM_175856	cg04729562	37	5	129239837	R	TSS1500	Island		-0.00969888	-103.105	0.000697932	5.578	0.00105	CGCCCCTCCGCTGGCCTCCCGACACTCGTGTCTGGGGGCTCTACTGGCCT
NIP7	NIP7, nucleolar pre-rRNA processing protein	NM_016101	cg05614267	37	16	69373129	R	TSS1500	Island		-0.0247999	-40.3227	0.00113858	2.082	1.87e-05	GCAGCTCTGCTGGAAGCTGGGCAAACGGTCGAGCAGGCGGCCGAGCGACG
BAMBI	BMP and activin membrane-bound inhibitor	NM_012342	cg05750029	37	10	28965858	R	TSS1500	Island		-0.0275568	-36.2887	0.00099935	4.561	1.82e-06	TCCTAACGGATCAACAGTCAGTCTGTCTGGGCTTTATTGATCCCATGGCG
BIRC2	baculoviral IAP repeat containing 2	NM_001166	cg06276114	37	11	102217591	R	TSS1500	Island		-0.0197881	-50.5354	5.14e-05	2.485	0.00916	CGCCGGTGGTTTTGCGCGTCCTACCCTGTGTCACCTCAGGGTTATGATCT
TWIST2	twist family bHLH transcription factor 2	NM_057179	cg06738242	37	2	239755703	F	TSS1500	Island		-0.0751117	-13.3135	0.000330649	4.352	0.000136	CGCTCACCGAGGCCGGGCCCCACACTCCAGCCACCCTGAGCCTCCTGCTC
CBFB	core-binding factor, beta subunit	NM_001755	cg06766367	37	16	67062687	R	TSS1500	Island		-0.0437901	-22.8362	0.00179603	3.178	0.000224	CCAAGGACTTAGGTTTCCTCGCGTTCAAGTGACAATCTGGGGTTACTCCG
PTGES3	prostaglandin E synthase 3 (cytosolic)	NM_006601	cg07281688	37	12	57082442	F	TSS1500	Island		-0.0269607	-37.091	0.00145717	3.289	0.00344	CGCGTTGGTTACTCTTGAGGGAGTAAATCAGCTCACTGAGTCATCATTCC
NPPC	natriuretic peptide C	NM_024409	cg07797231	37	2	232791732	F	TSS1500	Island		-0.0688939	-14.5151	7.51e-05	13.89	7.23e-09	AACACTCAGGCTGGCGACACCCCTGCACTCTCCAGTGTGGAAGACTTGCG
CLK1	CDC-like kinase 1	NM_001162407	cg08400563	37	2	201729555	F	TSS1500	Island		-0.0218057	-45.8596	0.00189347	2.631	0.0163	AAAAACTATCAGTGAGTGGGGACAACACGCCGACGGCTTCCTTTCATCCG
NUPL1	nucleoporin like 1	ENST00000463407	cg08532057	37	13	25875436	F	TSS1500	Island		-0.0466785	-21.4231	0.00156345	4.28	3.9e-07	TCAATTGCTACTTCTATCTAGCCTCCTGCCAAAATTGATGCTCAGAATCG
SLC6A6	solute carrier family 6 (neurotransmitter transporter), member 6	NM_003043	cg08926287	37	3	14443694	F	TSS1500	Island		-0.0473514	-21.1187	0.0002493	2.122	7.14e-05	CCTAGGATGAGGCCCAGGGCTCCTGGAGCAGCCAGGTGCAAACCAGACCG
TMEM97	transmembrane protein 97	NM_014573	cg10342447	37	17	26645325	F	TSS1500	Island		-0.0563209	-17.7554	0.000627284	2.997	3.69e-10	GGTCAAGGATTCGTTTACACGTTCAGCAAATACTGATGTTCATCTCCACG
WTIP	Wilms tumor 1 interacting protein	NM_001080436	cg10771931	37	19	34972145	R	TSS1500	Island		-0.0678747	-14.733	8.28e-05	2.381	2.65e-05	CGGCCTCTGAAGCCCCCATCTGACTGCTGGGGAAGGCGCCCAGAACTAGG
KCNK1	potassium channel, subfamily K, member 1	NM_002245	cg11382055	37	1	233749410	R	TSS1500	Island		-0.0226584	-44.1337	0.000828993	7.105	6.8e-07	AGGGGGCTTGGACGGCCAGCGCATTGACCAGAAGCGGCCCACACTACACG
NUF2	NUF2, NDC80 kinetochore complex component	NM_145697	cg11823214	37	1	163291487	R	TSS1500	Island		-0.0216446	-46.2009	0.00177191	4.364	5.56e-08	CGGGGTCCGAGTTGAAGAGCAAAACCAAGTGAAGGAAACTTCACTAAGTT
TNFRSF11B	tumor necrosis factor receptor superfamily, member 11b	NM_002546	cg12545993	37	8	119964636	F	TSS1500	Island		-0.044831	-22.306	0.000480007	2.056	0.00589	CGGCTGCCTGACCCCTTCACTTCGGGTTCTGAAACCTCAAATTACAGGGC
TTC28	tetratricopeptide repeat domain 28	NM_001145418	cg12565055	37	22	29076175	R	TSS1500	Island		-0.0360146	-27.7665	0.00211271	2.392	0.00446	CGCCCCCTTAGTAGCGTCCTTAACTCGACACTTCTTGCGGGGAAGTTCCT
HLX	H2.0-like homeobox	NM_021958	cg13170032	37	1	221052143	R	TSS1500	Island		-0.0998744	-10.0126	0.000254465	3.898	1.81e-08	CGGCCGCAAATTGGTTTTATTCTGAGCTGTCACACAGTGACAAATTGAAC
KIAA1324	KIAA1324	NM_020775	cg13932362	37	1	109656277	R	TSS1500	Island	TRUE	-0.00353623	-282.787	0.00208365	2.202	9.12e-07	CGTCGTCGCCTGGAAGAGGCCCCAGTACGTGTTCCCTCCTACGAAGGCCA
FLT1	fms-related tyrosine kinase 1	NM_001160031	cg14283783	37	13	29069941	R	TSS1500	Island		-0.0578261	-17.2932	0.000918536	12.16	1.09e-08	CGCTCCCCTGGGACCTGAGCTGGTTCGCAGTCTTCCCAAAGGTGCCAAGC
POLA1	polymerase (DNA directed), alpha 1, catalytic subunit	NM_016937	cg14520892	37	X	24711633	R	TSS1500	Island		-0.0899747	-11.1142	0.00102796	2.12	1.93e-06	CGCGCCCTGAATTTTGCCTGATAGTTTGCTTCTCAGCAGTCTGGATACAG
MAP2K3	mitogen-activated protein kinase kinase 3	NM_145109	cg14636712	37	17	21187553	R	TSS1500	Island		-0.0157084	-63.6602	0.0025001	2.89	4.85e-09	CGCTGCTGGGCTGCCTCCTGGCTCTCTGAACCTGCAGCTGCCTCACCCTA
SUSD4	sushi domain containing 4	ENST00000366877	cg15100599	37	1	223538174	R	TSS1500	Island		-0.0545895	-18.3185	0.0016707	2.074	0.018	GACCCGGTTAACTTGAGCACCGCCAATTGCCCGAGTCTCTTAATTTCCCG
DLEU1	deleted in lymphocytic leukemia 1 (non-protein coding)	NR_002605	cg17004212	37	13	50656130	R	TSS1500	Island		-0.0668557	-14.9576	0.000944999	2.519	1.04e-06	CGGCGCCATTTTCGAGTGATGCCTGATCTCATCAATCTAGCGGGAGAGAC
ZMYM5	zinc finger, MYM-type 5	NM_001039650	cg19404184	37	13	20438655	F	TSS1500	Island		-0.0446055	-22.4188	1.68e-05	2.215	3.51e-06	CCCAGCTCCAAGGGAGCCTGCAGCTCCCTCCATCTTGGTTGATGGAGGCG
ERRFI1	ERBB receptor feedback inhibitor 1	NM_018948	cg19560758	37	1	8086721	F	TSS1500	Island		-0.0614755	-16.2666	0.000140133	4.034	0.000123	CGCGGGATTTCCCATAAATTCAGGCTCCGGGCAAGATTGTGTGTTTTTTC
CYCS	cytochrome c, somatic	NM_018947	cg19892210	37	7	25165235	F	TSS1500	Island		-0.00818679	-122.148	0.00117752	3.194	0.000813	AAGCTCATTACATCACCACGCCCAAGAACTGATACTTTAGCAGGGCAACG
PPP1R3C	protein phosphatase 1, regulatory subunit 3C	NM_005398	cg19902394	37	10	93393086	R	TSS1500	Island	TRUE	-0.0742822	-13.4622	0.000150804	9.524	8.27e-06	CGTGCCTGCCCGGCCCCTAGCCCAGGGTTCCCGTTACGCGGCTGGTTCCA
RYBP	RING1 and YY1 binding protein	NM_012234	cg22685502	37	3	72496851	F	TSS1500	Island		-0.0499419	-20.0233	0.000224842	2.65	0.0148	CGGGAGGGAACAGTAGAGAAAGGGCGTGGCATAACTAAATGCCCCCAGGC
PAICS	phosphoribosylaminoimidazole carboxylase, phosphoribosylaminoimidazole succinocarboxamide synthetase	NM_001079525	cg22805500	37	4	57301680	F	TSS1500	Island		-0.0675813	-14.797	0.000400483	2.06	6.03e-07	CGGCCAAGGTGTAAGCACCAACCAGCTGCCAGCTCGGCCCGTCGAGCTCA
MYBL2	v-myb avian myeloblastosis viral oncogene homolog-like 2	NM_002466	cg23843505	37	20	42295420	R	TSS1500	Island		-0.0452607	-22.0942	0.00204114	4.039	1.89e-09	CGCCAGGGCGGAATCCCCCACGCTAGTCCAAGCCACTACTGGGTCCCTAG
ATOH8	atonal homolog 8 (Drosophila)	NM_032827	cg24399924	37	2	85980533	R	TSS1500	Island		-0.085688	-11.6702	0.000535424	47.43	9.9e-10	AGTGGACTGGGTTGCCGTGCCGGGCGGGTGTGGGTCGCCGGGCAACTCCG
GFI1	growth factor independent 1 transcription repressor	NM_005263	cg24683414	37	1	92952581	F	TSS1500	Island		-0.061685	-16.2114	0.00122066	6.863	3.81e-06	CGGGACCTCGCACGCGGGCTCTGCCACCGCCTGAGGTCATACCCAGGCAC
SPATA2	spermatogenesis associated 2	NM_006038	cg25188239	37	20	48532311	R	TSS1500	Island		-0.0524608	-19.0619	2.17e-05	2.158	0.0442	CGGCTTGCGTCACGTCCGGCCTGTTTACTTCCGGGTCCCAGTCTCAGACG
TAPT1	transmembrane anterior posterior transformation 1	NM_153365	cg25940730	37	4	16228647	F	TSS1500	Island		-0.0598159	-16.718	0.00109781	2.177	0.000636	GAGATGGAACCAAAATAGCGGGCAGGCAGGGCCGGCGCTCGTGGGGGTCG
ACP5	acid phosphatase 5, tartrate resistant	NM_001611	cg27002699	37	19	11689538	R	TSS1500	Island	TRUE	-0.0425131	-23.5222	5.62e-05	6.249	5.77e-06	CGGGGAGATCTGTGAGCCAGTGGCCTCAGCGTTGAATGAGAGCTCTCTCC
GNA13	guanine nucleotide binding protein (G protein), alpha 13	NM_006572	cg27490352	37	17	63053354	R	TSS1500	Island		-0.0111748	-89.4871	0.00188705	3.148	7.38e-06	CGCCGGCTGTTCTGTTCGAATAACTTTCGAGTCCGTGGCCTCGAAATGGG
TRIB1	tribbles pseudokinase 1	NM_025195	cg00184235	37	8	126442434	F	TSS200	Island		-0.0286194	-34.9413	0.00044133	2.313	2.24e-06	CGGGGCCGGAGTCGTCGCAGCCACCTCATTGCACAACCCGGCTTCCCAAC
KIAA1429	KIAA1429	NM_183009	cg00669777	37	8	95565739	F	TSS200	Island		-0.0064086	-156.04	0.00191673	3.073	0.0145	CTAGTGCTCTGGTCACCGGAAGTCCCTCTGTTTCTCCCTCTCCTGAGTCG
ARL6IP1	ADP-ribosylation factor-like 6 interacting protein 1	NM_015161	cg02426912	37	16	18812920	F	TSS200	Island		-0.0494018	-20.2422	0.00110424	3.263	0.000371	CGGCCCCCGCGACGCTCGCTCCTCATTGGACAGACCGAGCTTACGCCTCA
NDC80	NDC80 kinetochore complex component	NM_006101	cg02807146	37	18	2571313	R	TSS200	Island		-0.00730937	-136.811	0.000295537	4.144	7.54e-09	TCCTTTTCTAAGAGTCCATGGGCGCCGCCATGTTGCTGTACGGAAAAACG
PDE8A	phosphodiesterase 8A	NM_001243137	cg03461725	37	15	85525160	R	TSS200	Island		-0.027113	-36.8827	0.00174289	2.035	0.000473	CGCCCCTCCGAACATGCCCTTCCTGAGGCAGGAGCCGACGGCCGCCTCTC
PPP4R2	protein phosphatase 4, regulatory subunit 2	NM_174907	cg03770877	37	3	73046015	R	TSS200	Island		-0.0448647	-22.2892	0.000890633	2.188	0.0311	CCATGTTGGAGGGTTGGTGGTAGCGGCTTGGGGAGGTGCTCGCTCTGTCG
CDCA8	cell division cycle associated 8	NM_018101	cg05262634	37	1	38157968	R	TSS200	Island		-0.0285815	-34.9877	0.000903096	3.897	8.59e-10	CGGCTCCGCCCTGGCCGGCTGCGAACTATACAAACTACTACTCCCGGCAG
H2AFX	H2A histone family, member X	NM_002105	cg07697569	37	11	118966186	F	TSS200	Island		-0.00186228	-536.976	0.00215556	2.443	0.000165	GGAGGGCGCAGAGGTGTGTCCTGGGGGCTTATAAAGGCGGCCTCGCGGCG
PDRG1	p53 and DNA-damage regulated 1	NM_030815	cg08668662	37	20	30539908	R	TSS200	Island		-0.0194211	-51.4904	0.00230998	2.123	3.95e-07	CGCCTGCGCAGTTAAAAGAACGGTGGTGCGCAGGCTCTAACACTAGTGCG
DUSP10	dual specificity phosphatase 10	NM_007207	cg08708209	37	1	221915487	R	TSS200	Island		-0.0312634	-31.9863	0.000575395	3.661	0.000276	CGGCGGCGAGTCCGCCCCCTCAGAACCTTACATTTACAGTGTAGCAAAAG
SMNDC1	survival motor neuron domain containing 1	NM_005871	cg08770590	37	10	112064742	F	TSS200	Island		-0.0339132	-29.487	0.00193342	2.186	0.000872	CGCGAGGTCGCTCGACTCACGTGACTCCGCGCGCCCTCTAGCCAGTCCCT
LIPG	lipase, endothelial	NM_006033	cg11038073	37	18	47088421	R	TSS200	Island	TRUE	-0.0350165	-28.558	1.57e-05	9.208	5.83e-07	CGCTCCTATAGAGGTAGTTTTTAAAAGTATGGGAGTCATCTGACCCATCG
RLIM	ring finger protein, LIM domain interacting	NM_016120	cg11661234	37	X	73834596	F	TSS200	Island		-0.0633297	-15.7904	0.00139596	2.362	1.08e-05	TGGGGCCTGTCACATGGTGGGCGTCATAACAGCTTTCCTTTTCCAAACCG
TOP3B	topoisomerase (DNA) III beta	NM_003935	cg13665940	37	22	22337322	F	TSS200	Island		0.00767655	130.267	0.00157337	0.498	0.00197	CGCCGCGGACCGCAGGGATCCCCAAGCCCTGCACCCAGATTCTTCCCCGC
CDKN3	cyclin-dependent kinase inhibitor 3	NM_005192	cg14144732	37	14	54863539	F	TSS200	Island		-0.00353951	-282.525	0.000713221	3.544	0.0057	CTAATCGCTGACTGGTTCCTAGAAGACCTTTGAAAGACGCGCGGGAGGCG
RFC2	replication factor C (activator 1) 2, 40kDa	NM_181471	cg14330119	37	7	73668867	R	TSS200	Island		-0.0228662	-43.7327	0.000685911	2.03	0.000588	GCCTCTCTGTGCCTGCGAAGAGGGTTCCGGTGGTGCCCTGGCGGCCATCG
ERCC6L	excision repair cross-complementation group 6-like	NM_017669	cg16118600	37	X	71458866	R	TSS200	Island		-0.0696985	-14.3475	0.000221454	3.894	5.6e-06	GCTTGGAGCTTGGAGCTTAGAGTTTGGAGCTTGAATTTCGCTCACTCCCG
CENPE	centromere protein E, 312kDa	NM_001813	cg16532752	37	4	104119610	R	TSS200	Island		-0.0373289	-26.7889	2.51e-05	3.451	1.86e-08	CGTCACGAGGCCACGGCTCAATCAGATGCGGCGTTTGGGAAATTTTAAAT
WASH5P	WAS protein family homolog 5 pseudogene	ENST00000606872	cg20826792	37	1	29425	F	TSS200	Island		-0.0821059	-12.1794	0.000492838	2.38	0.000916	CGCCGCCGCTCGCCCTCCACTGCGCCCTCCCCGAGCGCGGCTCCAGGACC
OXCT1	3-oxoacid CoA transferase 1	NM_000436	cg21515384	37	5	41870856	R	TSS200	Island		-0.068823	-14.53	0.0015651	2.888	0.00101	CCTCCCCCTAGGTTGTGGATGAGTCTTGGCCTAGGGTTCAGGGCCCTCCG
PPP1R15A	protein phosphatase 1, regulatory subunit 15A	NM_014330	cg22143490	37	19	49375485	R	TSS200	Island		-0.00569867	-175.48	0.00027765	2.865	3.42e-07	CGAACTGTCAATCAAATGCGTGGCCCTGCTTCAACAGCGAGCCAGTTCTC
FZD1	frizzled class receptor 1	NM_003505	cg23191380	37	7	90893747	R	TSS200	Island		-0.0124792	-80.1333	0.000202967	5.965	5e-06	AAGGCTCCTCCCTCCTGGTGAAAGACAGACTACGGGGCGCCTGGAAACCG
MAP2K1	mitogen-activated protein kinase kinase 1	NM_002755	cg24449302	37	15	66679100	F	TSS200	Island		-0.0439889	-22.733	0.000294909	2.256	0.00214	CAACCAATGGGGGCAAGCCTCGGCGGCAGATGACGCGGAAATACGTCACG
TRIM59	tripartite motif containing 59	NM_173084	cg26433838	37	3	160167749	R	TSS200	Island		-0.034355	-29.1078	0.000789333	2.594	2.74e-06	GCCAATGGGAACTATTGCTGGGCTCGTTCGAAAGTAAACGGTGGACGGCG
HUS1	HUS1 checkpoint homolog (S. pombe)	NM_004507	cg27019250	37	7	48019388	F	TSS200	Island		-0.0290109	-34.4698	0.000481957	2.092	0.00212	CTGGGGCTTGAAGCCTCCGCCTCACTAAAAGTAGATCCCACCATTACCCG
PCDH10	protocadherin 10	NM_020815	cg27600205	37	4	134070416	R	TSS200	Island		-0.00305421	-327.417	0.00222371	2.194	0.00909	CGCAGCGCCCTCATTCTGCCAACCAATCGCCCAGGAGCACCACCCACCGA
SNAI2	snail family zinc finger 2	NM_003068	cg04226714	37	8	49833948	F	1stExon	N_Shelf	TRUE	-0.0307881	-32.4801	0.000425924	3.532	2.92e-06	CGGGCCGGCGCCTCTGAAGTCACCCGGCTCCTTTACGAACTGAGCCCGTT
HIST1H2BD	histone cluster 1, H2bd	NM_021063	cg04492287	37	6	26169666	F	3'UTR	N_Shelf		-0.167414	-5.97322	0.00128289	2.142	0.00168	CGTGGGCTCATACAGGAACTACCAAATTAATTGCATCAAGGCAAACATAT
LIMD2	LIM domain containing 2	NM_030576	cg09121543	37	17	61774794	F	3'UTR	N_Shelf		-0.0888575	-11.254	0.00176222	2.347	0.000465	CGCGGCAGCTTGCACCCCAGGCACTGAAGTGCAGCGAGGACAGGCGCCAT
CHAF1A	chromatin assembly factor 1, subunit A (p150)	NM_005483	cg19682666	37	19	4443084	R	3'UTR	N_Shelf		-0.0472467	-21.1655	0.000363747	2.594	0.000607	CGGTTCAAGTATCTGCTCTGTGGGGAGGACACCCTAAGCATTCTACATAC
PIK3CG	phosphatidylinositol-4,5-bisphosphate 3-kinase, catalytic subunit gamma	NM_002649	cg00510718	37	7	106505961	R	5'UTR	N_Shelf		0.0892557	11.2038	0.00129476	0.111	0.000304	TCGGAATAGTGGCACTTCCTTCTCGGCTAGATTATCTGAAACTGTTGTCG
KBTBD2	kelch repeat and BTB (POZ) domain containing 2	NM_015483	cg00566949	37	7	32927892	F	5'UTR	N_Shelf		-0.124788	-8.01359	3.2e-05	2.149	0.00768	CGACCAATCTTGAGGAGGCTGATGTCAGTGTAAAAAACTAAATGAGAGTC
NCOA5	nuclear receptor coactivator 5	NM_020967	cg15402992	37	20	44714513	F	5'UTR	N_Shelf		-0.0374528	-26.7003	0.00141781	2.103	1.47e-09	CGGTGAGGGAGTATTTAAATGTAAGACATTCAAAATATTGCCCATTTTAG
SPRY4	sprouty homolog 4 (Drosophila)	NM_030964	cg18684951	37	5	141700490	R	5'UTR	N_Shelf	TRUE	-0.0823456	-12.1439	0.000344497	5.258	2.96e-12	CGGGGCAGGTGGCCACTTGCAGAAGAGTGGTTTCCCTTGTCAGTAGTCTT
IKZF5	IKAROS family zinc finger 5 (Pegasus)	NM_001271840	cg20043202	37	10	124765622	R	5'UTR	N_Shelf		-0.0984985	-10.1524	0.00247553	3.259	0.000245	CGCTACTGGCATGACAATACTTTAGGTATACCCTAGCCAGTTTCTATATA
SBDS	Shwachman-Bodian-Diamond syndrome	NM_016038	cg02605800	37	7	66456737	F	Body	N_Shelf		-0.117285	-8.52624	0.000990853	2.699	1.02e-05	CGGGGGGGGTGGGCAAAGAACCTGAACAGAGATTTCTCAAAAGAAGACAG
SLC7A5	solute carrier family 7 (amino acid transporter light chain, L system), member 5	NM_003486	cg03879320	37	16	87890567	R	Body	N_Shelf		-0.0538198	-18.5805	0.000479782	5.93	4.1e-09	CTGCACAGAACAAGGTCCCAGGGAGGCTGGTGCTGCCGGCCTGGGGAGCG
MAGOHB	mago-nashi homolog B (Drosophila)	NM_018048	cg08500128	37	12	10763670	R	Body	N_Shelf		-0.071673	-13.9523	0.00247965	3.256	0.000305	TGCCTCACCCAGAGCATTTAATCTAATCTGTAAAACAATCCCAAAAATCG
EFNB2	ephrin-B2	NM_004093	cg11196529	37	13	107182539	R	Body	N_Shelf		-0.0979629	-10.2079	0.000128999	23.94	2.01e-09	TTTGGCTTTATAGAGACAATGAAGCCACAGGAGTTTTTCCAAGCTGTTCG
VGLL4	vestigial-like family member 4	NM_014667	cg14224441	37	3	11743273	R	Body	N_Shelf		-0.142088	-7.03789	0.00128012	2.244	2.82e-05	GGACTAAACTGGAAAGAGCTCATCTTCGAGAACTTATAATGTATAAAACG
DEPDC1B	DEP domain containing 1B	NM_018369	cg15825856	37	5	59992788	R	Body	N_Shelf		-0.0245016	-40.8137	0.000691991	3.541	7.59e-06	CGAGGTTGTGGCAAGTGCAAGTAGATCTAGGAGTGGTTGTCACTGAACTC
KLHL21	kelch-like family member 21	NM_014851	cg18116088	37	1	6657059	F	Body	N_Shelf		-0.0750129	-13.331	0.000314259	2.381	2.76e-05	CGGGACAAATAGCCCAGGGGGACCAGCCCCAAGCAGGGCCCCTGCATGCT
VPS53	vacuolar protein sorting 53 homolog (S. cerevisiae)	NM_001128159	cg21512564	37	17	613778	F	Body	N_Shelf		-0.0348043	-28.7321	0.000119816	2.072	0.003	CGGTTGGGAACAGGGTATTGATATACTCAACAGCATTGAAATCTGCTCGA
F11R	F11 receptor	NM_016946	cg22170599	37	1	160987731	F	Body	N_Shelf		0.034125	29.304	0.0016728	0.298	4.68e-05	TTTGCTCCCCTGCCCTTCCTTGAGTGTGGTATCATCACTGAAGAGTTCCG
RNF6	ring finger protein (C3H2C3 type) 6	NM_005977	cg23151860	37	13	26793689	R	Body	N_Shelf		-0.0657741	-15.2036	0.00202233	2.748	1.14e-06	TCATTGAGTTCATTAATAAACTGATAATAGGCCTCTTCTCTGTGGAGACG
SLC45A4	solute carrier family 45, member 4	NM_001286646	cg24855956	37	8	142224459	F	Body	N_Shelf		-0.0381815	-26.1907	0.00153267	6.241	1.78e-08	CGGAGCTCATTAGACACAGATGATGTGGCTGTGTAAGTAGATGGCCCAAA
STIL	SCL/TAL1 interrupting locus	NM_001048166	cg25015912	37	1	47775801	F	Body	N_Shelf		-0.122578	-8.15807	0.00021577	5.162	0.000664	CGGTCACCCACCTAACAAGTGGTAGAGCTAGGATATGAACCCAGAATTTC
ARRDC3	arrestin domain containing 3	NM_020801	cg25103197	37	5	90672527	F	Body	N_Shelf		-0.162665	-6.1476	0.000156633	2.361	0.00275	CGGCTTTCACCCAATAGCGCACACTGCCATGTCGGCCTTCGAATGAGGTA
TUBGCP3	tubulin, gamma complex associated protein 3	NM_006322	cg26272907	37	13	113199311	F	Body	N_Shelf		-0.0941925	-10.6166	0.000880825	2.499	0.00339	CGCCACTTCCCGCCACACACAGTCTGCGGCCCCGACGGCCCACTCCCACA
BAIAP2L1	BAI1-associated protein 2-like 1	NM_018842	cg26980996	37	7	98026481	F	Body	N_Shelf		0.111218	8.99135	0.000183884	0.289	9.28e-05	CTTTCAGTGTCACCTCAAGGAAGTATGCTCAGACTCTCAGATTGCAGACG
PRR22	proline rich 22	NM_001134316	cg00783549	37	19	5784679	R	1stExon	N_Shore		-0.0162739	-61.4481	0.00150495	3.168	4.63e-05	TGGGGAGCTGCAGGGGCACAGAACGGTTTGGGGTGCTGCATGGGGCAGCG
HIST1H2AC	histone cluster 1, H2ac	ENST00000314088	cg16218610	37	6	26124417	F	1stExon	N_Shore		-0.0107114	-93.3585	0.000477655	2.454	0.000147	CGTGAGCTTAGGCCGCTGGTTTTGGTGATTTTTGTCTGATTGCAATGTCT
ARC	activity-regulated cytoskeleton-associated protein	NM_015193	cg24450303	37	8	143694010	R	1stExon	N_Shore		-0.0881161	-11.3487	5.64e-05	5.012	0.000194	CGGCGCCGCCGCCCTCTCCCGGCATCCGCAGAGCCAGCTGACGCCCTCCC
HIST1H2BK	histone cluster 1, H2bk	NM_080593	cg16991515	37	6	27107019	R	3'UTR	N_Shore		-0.0333963	-29.9434	0.00205169	2.127	0.000303	CGGACCAGACTGAAAACCGGAAGAGCTTTGGCGGGAAGTCCCTCTGCATT
PLVAP	plasmalemma vesicle associated protein	NM_031310	cg26817371	37	19	17462455	R	3'UTR	N_Shore		-0.0791328	-12.637	0.00207166	12.62	4.5e-07	ACACTCACGCTCAAGGAGCGGAGGTGAATGGCTTCCTGTTCTCACCTCCG
NACC2	NACC family member 2, BEN and BTB (POZ) domain containing	NM_144653	cg00236077	37	9	138964801	F	5'UTR	N_Shore		-0.0634572	-15.7587	4.72e-05	2.836	0.000223	CGGGGCTAGGCAGAGAGTTCTTCCATAAAAGAAAAAAACTGATAAACTGG
AURKA	aurora kinase A	NM_198433	cg03139435	37	20	54966401	F	5'UTR	N_Shore		-0.0612623	-16.3233	0.00209103	3.026	7.47e-08	TTTTAGACCTGGGGTTAGGCCTCAGAGTCTCCATTTCTAAGAACCATCCG
TMSB15A	thymosin beta 15a	NM_021992	cg03669491	37	X	101770334	R	5'UTR	N_Shore		-0.0586684	-17.045	0.000207011	2.747	2.13e-05	CACATCATTAGCCCATTTTGATATGCAGTAAATGCCGTTGGATCAGAACG
BCL6	B-cell CLL/lymphoma 6	NM_001130845	cg06164260	37	3	187454439	R	5'UTR	N_Shore		-0.0820831	-12.1828	0.000170354	2.144	1.6e-07	CGGTGAAAAGCCCAAGGCCCAGCTGACAGTGGACACAGGGGAATTTGTTT
KIAA0040	KIAA0040	NM_001162893	cg06187103	37	1	175161561	F	5'UTR	N_Shore		-0.0522114	-19.1529	0.00196853	9.205	2.21e-08	TGGTGTGTTTCCCTCCTTCGCGAGGACTCTCAGGAGTCTTCCTCTCTGCG
SPG20	spastic paraplegia 20 (Troyer syndrome)	NM_015087	cg09072216	37	13	36919344	R	5'UTR	N_Shore		-0.0656785	-15.2257	0.000296877	2.071	6.4e-05	CGGGATGCTACGGAGGGAGGTGTATACAGGTGTTAGACAAAGCCCCCTCC
NFIL3	nuclear factor, interleukin 3 regulated	NM_005384	cg13555464	37	9	94183343	F	5'UTR	N_Shore		-0.0683783	-14.6245	0.00161163	2.941	0.000227	CTGCAGACACCTTTGTTCCAAGAGTCTTCATTGTATTTCGGAACCAAGCG
ZFAND2A	zinc finger, AN1-type domain 2A	NM_182491	cg13913666	37	7	1198122	F	5'UTR	N_Shore		-0.0638748	-15.6556	0.000669694	3.612	3.66e-07	CGGGTTTCTATTTAAACTCACACTGAGGGGGCGAGAGCTAATTCACACAG
HAS2	hyaluronan synthase 2	NM_005328	cg14904923	37	8	122651570	R	5'UTR	N_Shore		-0.046447	-21.5299	0.00109415	9.045	1.3e-07	CGCTGCTCCAACCCACGTGTCTGGGCTGGGATTGCCTTTGACGTCACACA
LRRC32	leucine rich repeat containing 32	NM_005512	cg20899321	37	11	76380605	F	5'UTR	N_Shore		-0.0477426	-20.9457	0.000144049	2.656	2.44e-07	CGGATGAGAAAACAGTTTCCGGAAAGTGAAGTGACTTACCCCCAGAGTTA
ARHGAP21	Rho GTPase activating protein 21	NM_020824	cg23405364	37	10	25011077	R	5'UTR	N_Shore		-0.0782811	-12.7745	0.00105479	2.87	0.00121	CGCCTTTGTTTTTAAGTCTCCAGAAATGGAAGAAGAAGGCGAAGTCAGTT
CYP1B1	cytochrome P450, family 1, subfamily B, polypeptide 1	NM_000104	cg00565882	37	2	38300707	R	Body	N_Shore		-0.0864152	-11.572	0.00174444	17.25	6.45e-05	CGGATTCAACAGGTCCCTGGTGTCGGGTTGCCAGATTTGGCAAAAGAAAA
F3	coagulation factor III (thromboplastin, tissue factor)	NM_001993	cg01185754	37	1	95006729	F	Body	N_Shore		-0.0859559	-11.6339	0.00254319	25.51	3.91e-05	CGCAGGCACAAGTCCTATCATATTGAAGGTCGCAACTCACTGGGAAGCCC
BUB1	BUB1 mitotic checkpoint serine/threonine kinase	NM_004336	cg01476138	37	2	111433964	F	Body	N_Shore		-0.0844208	-11.8454	0.000565377	4.485	1.13e-09	CGCATCTTGCTTGTAGGTGGGCATGTGCTCAATTCCTGCCAAGGGAATTA
HCG18	HLA complex group 18 (non-protein coding)	NR_024052	cg01842890	37	6	30292264	R	Body	N_Shore		-0.159544	-6.26786	0.000461732	3.803	1.27e-07	CTATCGCTTGAAAAATACCGGATATTTCATTATTATCCTGTCCGGAGTCG
ZNF618	zinc finger protein 618	NM_133374	cg02066570	37	9	116661680	R	Body	N_Shore		0.0635824	15.7276	0.00227344	0.217	0.000588	CGGACCTGTACTGGTCTGCAGCCTGGAGGCTGGGGACCCCTGATCTAAGT
TMEM170A	transmembrane protein 170A	NM_145254	cg02091341	37	16	75497728	F	Body	N_Shore		-0.0311822	-32.0696	0.000135558	2.174	9.2e-05	CGGGGAGGAAGAGTTCAAAGGAAGCTGTGCCAAAGATCTCGAAGGCTTAG
LEPRE1	leucine proline-enriched proteoglycan (leprecan) 1	NM_022356	cg04118124	37	1	43231249	R	Body	N_Shore		0.0579979	17.242	0.000538469	0.37	0.0156	CGCTGGACTTGAAATCAAAATAATTGCGTTATGTCTTTGGTTATGTCGCT
DFNB31	deafness, autosomal recessive 31	ENST00000374057	cg04759982	37	9	117265427	F	Body	N_Shore	TRUE	-0.0578148	-17.2966	0.000722626	8.731	2.74e-05	CGTGGGCCTCTGCTGCCTAGGAGTTTCCCAGCAGCCAGCAGGCCCTCAGC
MSX1	msh homeobox 1	NM_002448	cg06375949	37	4	4863356	R	Body	N_Shore		-0.0675859	-14.796	0.00186991	3.476	2.61e-06	TCACTTTCTGCCGGGAAAGCTGCTGCATAGGCAAAGTGTCCTTTCCAACG
COL24A1	collagen, type XXIV, alpha 1	NM_152890	cg07598580	37	1	86620525	F	Body	N_Shore		-0.100979	-9.90305	4.56e-06	2.057	0.0273	CGCCTCTCCTGGAGTCTCCAGGCTGGCAGGGCTAGAGCCTCTCTGCATCC
FBXO33	F-box protein 33	NM_203301	cg08055667	37	14	39900384	R	Body	N_Shore		-0.00575779	-173.678	0.000422423	3.138	0.000693	TCCTTCCCTCACCATGAACTATTTCTAACAGATTCAGAGTCAGAAAATCG
CRLF1	cytokine receptor-like factor 1	NM_004750	cg10004114	37	19	18715471	R	Body	N_Shore	TRUE	-0.08362	-11.9589	2.53e-05	2.137	3.51e-06	TCCAGGCCTCCACAAACAATGGGCTAAGGCGCTGGGGACAGAGATGCACG
APOLD1	apolipoprotein L domain containing 1	NM_030817	cg10048215	37	12	12938383	F	Body	N_Shore		-0.0785062	-12.7378	8.03e-05	2.514	3.18e-06	ACATCCCGTATTTAGGAAACGAACATTGTGTGTTCGCTTTCCCCTGAACG
STX1A	syntaxin 1A (brain)	NM_004603	cg10286163	37	7	73118245	F	Body	N_Shore	TRUE	-0.0803626	-12.4436	7.06e-05	2.531	0.000396	GGGGGGCGGGGCCTGAGGCTGCCGCTGAGCTCGGGGCTGGGGGGAGCCCG
ADORA3	adenosine A3 receptor	NM_020683	cg10376161	37	1	112057879	R	Body	N_Shore		-0.0916051	-10.9164	3.22e-05	2.316	0.000239	CGCCCGCCACTGTGATGCTCAGAAAATCATTTCCAGGTTAGTCTGGGTCA
TSPYL2	TSPY-like 2	NM_022117	cg11555315	37	X	53115787	F	Body	N_Shore		0.0763863	13.0914	0.000968546	0.434	0.00487	CGAGGTGGGGGAGTGGCAAAACACAGTGCATTTCAGCACAGTCTGTACCC
LMO2	LIM domain only 2 (rhombotin-like 1)	NM_005574	cg12695685	37	11	33890131	F	Body	N_Shore		-0.0794896	-12.5803	0.000425435	4.615	2.1e-08	CGGCCAATGCTCATTAGAGCTCTGGTTCCCTGACCCCAAACCCTTTTAAG
HLA-B	major histocompatibility complex, class I, B	ENST00000466304	cg13031097	37	6	31322577	F	Body	N_Shore		0.0425253	23.5154	0.000639696	0.196	4e-07	CGAGGAAAGCAAGTGTGGGTCCTGGACCAACTGCCCTCCTAAGGTCTGTC
PRC1	protein regulator of cytokinesis 1	NM_003981	cg14398957	37	15	91536180	F	Body	N_Shore		-0.055185	-18.1209	0.00116262	2.886	6.04e-08	CGGGGATCGATAACCATAATTAATTCTGGCCAGAGTTTCGTTTGAGCCTC
CDKN2D	cyclin-dependent kinase inhibitor 2D (p19, inhibits CDK4)	NM_001800	cg17491564	37	19	10677931	F	Body	N_Shore	TRUE	-0.066521	-15.0328	0.000274721	2.125	0.000526	ATTCCTGGACACCCTGAAGGTCCTAGTGGAGCACGGGGCTGATGTCAACG
C14orf80	chromosome 14 open reading frame 80	NM_001134875	cg18591945	37	14	105962171	F	Body	N_Shore		-0.0431404	-23.1801	0.00235527	3.316	4.85e-05	CGGCACTGGCCAGGTGGACTGGGGCCATGGCTGGCTTCCTTCCAAGGTTT
OIP5	Opa interacting protein 5	NM_007280	cg19468534	37	15	41623761	F	Body	N_Shore		-0.0835721	-11.9657	0.00117011	3.121	2.93e-06	CTACAATCCTTTTAGATATTAGAACTTTTTGATACAGGGTCTTGCTCTCG
KIAA1875	KIAA1875	NR_024207	cg26272248	37	8	145163034	R	Body	N_Shore		-0.0872297	-11.464	0.000163436	2.187	0.00241	AGGTCCTGCCCTTTTTGACCAGCAGCCAACAGTGGCAAAGCCTGACCCCG
KLF13	Kruppel-like factor 13	NM_015995	cg26814396	37	15	31621629	R	Body	N_Shore		-0.140837	-7.10041	0.00162094	2.028	8.85e-06	ATGATGCCCGTGCTGGGCAGGATACTTAATGTTTGGGAAATTTTTCTACG
TNFAIP8L3	tumor necrosis factor, alpha-induced protein 8-like 3	NM_207381	cg27017085	37	15	51385812	R	Body	N_Shore		-0.0643443	-15.5414	0.00116015	2.61	1.46e-05	CGGGCTGGGACCCTCCTGTACAGACCGCGGCCCTGGCTAAGCCCCCACTC
CMTM8	CKLF-like MARVEL transmembrane domain containing 8	NM_178868	cg01617750	37	3	32279261	R	TSS1500	N_Shore		-0.0670577	-14.9125	9.01e-06	3.631	0.000952	GAGGTCCAAAAACTAGAGCCACTCGCTCTGGGTCATACAGCCGATAAACG
BNIP3L	BCL2/adenovirus E1B 19kDa interacting protein 3-like	AF370457	cg01706566	37	8	26239922	R	TSS1500	N_Shore		0.068622	14.5726	0.000271253	0.358	7.86e-08	CGTGGGAAGCCGTTTATCCTGTACGTGGATGACATTAAACTATGTTCCTG
MAFK	v-maf avian musculoaponeurotic fibrosarcoma oncogene homolog K	NM_002360	cg01784819	37	7	1569242	F	TSS1500	N_Shore		-0.0647676	-15.4398	4.98e-06	2.051	1.47e-05	GTGGCTGGGGATTTAGGCAGCAGCCCAGTGGCCTCTTGCTGTGGAGCGCG
CHMP1B	charged multivesicular body protein 1B	NM_020412	cg02755938	37	18	11850146	F	TSS1500	N_Shore		-0.0616296	-16.226	0.000778694	2.415	1.99e-06	CAGTCAAAGCAAACCGCAGCATGGAATTTGAGCATTATTTGCGTCATTCG
PRRC1	proline-rich coiled-coil 1	NM_130809	cg02762363	37	5	126852998	R	TSS1500	N_Shore		-0.0494459	-20.2241	0.00106688	2.064	0.0446	CGGCCCAAGGGATAAGATCAGTTAGCCAAGGTCATCTGGTTGGCGGTCAT
FAM64A	family with sequence similarity 64, member A	NM_001195228	cg03736603	37	17	6346862	F	TSS1500	N_Shore		-0.0397866	-25.1341	0.00038392	3.617	0.00446	CGGAGAGGGCTGAAGACAGAGTCTCAAGAAGCCATCATCTCAGGCTCTTG
LGR6	leucine-rich repeat containing G protein-coupled receptor 6	NM_001017403	cg04343883	37	1	202162338	F	TSS1500	N_Shore		-0.0450714	-22.187	0.000780464	2.153	0.000413	GGATGACCCGACGGTGGGCAACCAGGAGCAGTCTCCTCACTGAGAGGCCG
DDX3Y	DEAD (Asp-Glu-Ala-Asp) box helicase 3, Y-linked	NM_001122665	cg05128824	37	Y	15015176	F	TSS1500	N_Shore		-0.113205	-8.83353	6.96e-06	2.792	3.21e-06	CGCTGAGAGTTCAGAGGGAAGAAGTGTTTGTAAAACCACGTATATGGCTA
ZNF655	zinc finger protein 655	NM_024061	cg05165378	37	7	99155739	F	TSS1500	N_Shore		-0.0677045	-14.7701	0.00181853	2.128	1.67e-06	GACCCACTAAGTTGTGGGATCGAAATCTCAGTAGGTCCTTGGGGAAAGCG
CLCN6	chloride channel, voltage-sensitive 6	NM_001286	cg05228408	37	1	11865352	R	TSS1500	N_Shore		-0.0449834	-22.2304	0.000490917	2.156	0.000198	GGGGTATCCCCAGAGTTTGGCACACGGTGATAGCCAACATTCACTGAGCG
KIFC1	kinesin family member C1	NM_002263	cg05982236	37	6	33358419	F	TSS1500	N_Shore		-0.0177867	-56.2218	0.00173898	4.092	2.61e-05	TATGTTCGGGGATTTGGTGTGCAGTTGGAAATTGGCAGGTCTGACACCCG
KCTD5	potassium channel tetramerization domain containing 5	NM_018992	cg06057750	37	16	2731600	F	TSS1500	N_Shore		-0.141822	-7.05109	4.03e-05	2.054	4.59e-05	CGCGCCCGGCCTAAATTCTAATATATGAATTATTTGTATTGAATTCATGT
CRIP1	cysteine-rich protein 1 (intestinal)	NM_001311	cg06618474	37	14	105952171	R	TSS1500	N_Shore		-0.0684625	-14.6065	0.000959846	2.431	3.15e-05	CGGCACCTCGAGGCCTGCACTTAGAGGAAGAGAAGCCGCCTGCCCTGCCC
ST8SIA2	ST8 alpha-N-acetyl-neuraminide alpha-2,8-sialyltransferase 2	NM_006011	cg06675273	37	15	92936465	R	TSS1500	N_Shore		0.0370372	26.9999	0.00136071	0.433	4.21e-05	GGTTCTAGCCGAGGGTTCCAGCCAGGACTGCGTGATCTGGGGGCAGCTCG
RELB	v-rel avian reticuloendotheliosis viral oncogene homolog B	NM_006509	cg06716283	37	19	45504390	F	TSS1500	N_Shore		-0.064701	-15.4557	0.00257246	2.229	0.00171	CGGCAGGTTCAAGTCCCACTGGGAGACCAAAGCGGGGAGCGGCTCAGTTT
SPATS2L	spermatogenesis associated, serine-rich 2-like	NM_001282735	cg06905367	37	2	201170384	F	TSS1500	N_Shore		-0.0565391	-17.6869	0.000721232	2.363	6.73e-07	GCTTCTCGAGCTCCAGACTCTAATGGGCCTCCGAGGGCACTGCAGAATCG
DHDH	dihydrodiol dehydrogenase (dimeric)	NM_014475	cg07134608	37	19	49436579	F	TSS1500	N_Shore	TRUE	-0.0433293	-23.0791	0.000975327	2.011	0.00525	TGGACTTTGTGGCAAAACTTTGCCCTGACTTTTTTGCTCTCAAAGCCACG
C15orf39	chromosome 15 open reading frame 39	NM_015492	cg07158808	37	15	75493819	R	TSS1500	N_Shore		-0.0117378	-85.1948	0.000766668	3.231	0.000309	GAGCCCTTCTCCAGCCCCCTAATACACTAGTGCTGGACAGGGGAATGCCG
ARL13B	ADP-ribosylation factor-like 13B	NM_182896	cg07204803	37	3	93698231	F	TSS1500	N_Shore		-0.0931453	-10.7359	0.00108447	2.649	0.0147	CGCCCGGCCCCAAATGGTTATCTTTGAGAGCTCCTGTGAGATCTCATTTT
SGK3	serum/glucocorticoid regulated kinase family, member 3	NM_013257	cg07554251	37	8	67686871	F	TSS1500	N_Shore		-0.0449788	-22.2327	7.57e-05	2.378	0.000275	CGCCTGAGCTGTTTGAAGGGAACGAGATTGATTAACAATTTAAGCTCGGG
TTK	TTK protein kinase	NM_003318	cg08044663	37	6	80713582	F	TSS1500	N_Shore		-0.0531972	-18.798	0.000996989	4.694	9.04e-06	CGAGGAGTAACCGTTGCCCTGGACCACAAAGCCACTTAGCGGCAGAGCCT
ZNF586	zinc finger protein 586	NM_017652	cg08140458	37	19	58280728	F	TSS1500	N_Shore		-0.0745638	-13.4113	0.0010666	2.404	0.00198	CGCGGGCAATCAGTTGCACACAGTACCCCCAGAAATGTGCGTATGGCCTC
CA13	carbonic anhydrase XIII	NM_198584	cg08508368	37	8	86157364	F	TSS1500	N_Shore		-0.0553831	-18.056	0.00216091	3.487	2.54e-05	CGGGAGCTGGTCCTCTCTAACAGCGACCCCGCCCGCTTTAGCTGAGCGAC
CNP	2',3'-cyclic nucleotide 3' phosphodiesterase	ENST00000592861	cg08539620	37	17	40118030	F	TSS1500	N_Shore		-0.0767814	-13.024	0.000285113	2.663	0.00103	CGCCTCTGACACCTCTGGGTGGCATAATCAGGTAAATCAGGCTCTCCAAG
CENPA	centromere protein A	NM_001809	cg10315993	37	2	27008359	F	TSS1500	N_Shore		-0.0469168	-21.3143	0.000139044	4.795	4.28e-05	CGCCGTCCCCGCGACCCCAAGCGTCAGCAAAGTTTATGCAGTTGAACTGG
ACADM	acyl-CoA dehydrogenase, C-4 to C-12 straight chain	NM_000016	cg10523679	37	1	76189770	R	TSS1500	N_Shore		-0.0608926	-16.4224	0.00185605	2.844	0.0322	CGCTGATGTGGTGTCCTTGGATATGCGGGTGCAATCCGAGGCTGTCCAAA
ZFY	zinc finger protein, Y-linked	NM_003411	cg10557773	37	Y	2801877	R	TSS1500	N_Shore		-0.164573	-6.07633	0.00243281	2.816	0.000746	CGTGTTCCACCACACCCAGCACTTTTCAATTTTTTTGTACAGATGGATCG
PRDM2	PR domain containing 2, with ZNF domain	NM_015866	cg11344626	37	1	14026360	F	TSS1500	N_Shore		-0.103177	-9.69208	0.00125494	2.046	1.04e-05	GGGCATGTCTATCGTTGGAGGTCATTAAATATCTGACAAGTACATAAACG
MIS12	MIS12 kinetochore complex component	NM_024039	cg11488514	37	17	5389158	F	TSS1500	N_Shore		-0.023091	-43.3069	0.00237944	2.494	4.84e-06	CGGCGCTCATCTCTTAGAAACTGACCTGACCCCCCATGAAGCAGCACTCC
ENTPD7	ectonucleoside triphosphate diphosphohydrolase 7	NM_020354	cg11736228	37	10	101418244	F	TSS1500	N_Shore		-0.0401292	-24.9195	0.00116362	4.261	1.56e-07	CGTGCTAAGTGAAACAATAGGCATGTATAAAAAAGGTGTAGTAGGTCAAG
PPAPDC1A	phosphatidic acid phosphatase type 2 domain containing 1A	NM_001030059	cg12011977	37	10	122215735	F	TSS1500	N_Shore		-0.0796645	-12.5526	0.00220772	2.237	2.59e-06	GACCTCCAGCTGGAGCCCAGCAGGAGCTTGGATTTGCTTTTCCCAAACCG
KIF2C	kinesin family member 2C	NM_006845	cg12276329	37	1	45205272	R	TSS1500	N_Shore		-0.00745606	-134.119	0.000171339	4.307	7.51e-09	CGGGGTTCCCGAAAACTGGGAAACTTCAGTATGTATTTGACAATGAGGGC
CACHD1	cache domain containing 1	NM_020925	cg12730853	37	1	64935328	F	TSS1500	N_Shore		-0.0628392	-15.9136	0.000850813	3.023	0.000387	CGCGGAGATTAAAGGATAATGTGCACACCCCCGAGCCCAGTGCCGGGCAC
ARAF	v-raf murine sarcoma 3611 viral oncogene homolog	NM_001256197	cg13372830	37	X	47420231	F	TSS1500	N_Shore		-0.0508409	-19.6692	0.00161416	3.071	0.00121	CGGGAAAATCATAAAAGGGTGCTTAGGGCACTGGCCCAAAAAGGGTACTT
TMEM57	transmembrane protein 57	NM_018202	cg13795696	37	1	25755935	F	TSS1500	N_Shore		-0.0442183	-22.6151	0.000246587	2.068	4.76e-07	CGCCCAGCCCTTCCTGGGAAGTTTTAAAAATGCACTGGAAGACTAACTGC
MYLIP	myosin regulatory light chain interacting protein	NM_013262	cg14298379	37	6	16128926	F	TSS1500	N_Shore		-0.0221371	-45.173	0.0013517	2.142	8.46e-08	AGCTGCCACTGTTCTTCAAATATCTTGGATCACTCTGAGCACGCATTTCG
CEBPG	CCAAT/enhancer binding protein (C/EBP), gamma	NM_001806	cg15046693	37	19	33863876	R	TSS1500	N_Shore		-0.0625686	-15.9825	0.000561059	2.747	1.99e-05	GCGAGTTTTAAGTCACACTGGATCGCTGCTTATTTTCAGAGATCACCTCG
SKP2	S-phase kinase-associated protein 2, E3 ubiquitin protein ligase	NM_032637	cg16113047	37	5	36151301	F	TSS1500	N_Shore		-0.0173189	-57.7404	0.000670566	2.283	6.5e-05	CCCGTGCACGCAGGGGGCCTCCAGCAAAGCCATTTGGTTGCTTGCTGTCG
HERPUD1	homocysteine-inducible, endoplasmic reticulum stress-inducible, ubiquitin-like domain member 1	NM_014685	cg17808849	37	16	56965376	F	TSS1500	N_Shore		-0.0345831	-28.9159	0.00132202	3.485	1.95e-05	CGTTCAAGTCTGAGGCCCAGGGAAATTGGCAACAGCTGCCTGGATGCCTC
PRPF38B	pre-mRNA processing factor 38B	NM_018061	cg18384976	37	1	109234647	R	TSS1500	N_Shore		-0.0142465	-70.1927	0.00113302	2.154	0.0255	CTCTCGGATACTCTGCAGAAGTCAGAGTGACGATATTAGCAAGCACACCG
MAP3K8	mitogen-activated protein kinase kinase kinase 8	ENST00000375322	cg18806716	37	10	30721971	F	TSS1500	N_Shore		-0.080979	-12.3489	0.000339933	29.42	2.52e-06	ATTTCCCACGTATCAAGCACCCACTAGGAACCAGGCATTCGGCTAGAGCG
C2CD4A	C2 calcium-dependent domain containing 4A	NM_207322	cg19294311	37	15	62358920	F	TSS1500	N_Shore		-0.0628545	-15.9098	2.72e-06	5.396	7.39e-05	AAGTTTCTGTTTCCTCACATGCAAAATGGTATTAAGTCTCTACTATACCG
RBBP8	retinoblastoma binding protein 8	NM_002894	cg19304407	37	18	20512860	R	TSS1500	N_Shore		-0.0374143	-26.7277	0.000192179	2.668	0.000634	CCCGTTTAACCTCAGCAAAATACAGATCGTTTTGATCTATGGCGTTACCG
ZNF207	zinc finger protein 207	NM_001032293	cg19777771	37	17	30676863	R	TSS1500	N_Shore		-0.0879462	-11.3706	0.00106824	2.225	6.1e-05	CGCCCAATTTTAATTTTGTTTCAATTGAACAGTAAATGTTGATTATGTGC
DYRK2	dual-specificity tyrosine-(Y)-phosphorylation regulated kinase 2	NM_006482	cg20408290	37	12	68042072	F	TSS1500	N_Shore		-0.0257894	-38.7756	0.00101009	2.371	1.4e-05	CGGGGAAGCAGTACTGTCTGTGAGCAGCCATTCAGTTCGAAGAGCTGAAA
DR1	down-regulator of transcription 1, TBP-binding (negative cofactor 2)	NM_001938	cg20694648	37	1	93810985	R	TSS1500	N_Shore		-0.010356	-96.5624	0.00180715	2.073	1.09e-05	CAGACATCTTGAAAAGCTTTTTCTCCAGACGACGCAGAAACAGGCACACG
TSKU	tsukushi, small leucine rich proteoglycan	NM_015516	cg20886049	37	11	76493545	R	TSS1500	N_Shore		-0.0653775	-15.2958	0.00165392	2.172	0.000686	CGCATTTCCTAGGAGGGGAGAGTCAGGTGTGTGGGTGGCTCCCAGTCTAC
SEH1L	SEH1-like (S. cerevisiae)	NM_001013437	cg22185043	37	18	12947723	R	TSS1500	N_Shore		-0.0612445	-16.328	6.85e-05	2.2	7.96e-05	CGTCCCGCCCCCGGCCCGTCATGCCCTACGATCCTGGTGCGGGTTCCTCC
MAP3K1	mitogen-activated protein kinase kinase kinase 1, E3 ubiquitin protein ligase	NM_005921	cg23094728	37	5	56110263	R	TSS1500	N_Shore		-0.0690018	-14.4924	0.00142949	2.235	0.000613	CGCTGCGTTGTGAGTCCTCCTAGTCCCTGGACTCTACGTGAGAAGGTGCT
CACYBP	calcyclin binding protein	NM_014412	cg24338780	37	1	174968123	F	TSS1500	N_Shore		-0.0401579	-24.9017	0.000742859	2.319	0.000205	GGAAACAACCCCTGAGAGGTCACATAGCGCGCACTCAGCTTTACAGATCG
PTP4A1	protein tyrosine phosphatase type IVA, member 1	NM_003463	cg24631428	37	6	64281604	F	TSS1500	N_Shore		-0.112717	-8.87178	0.000804748	2.299	0.000427	CGAAATGCCACAATTGAGCCAACTGCAGTTGCACGCGTACGTAGTATAGA
IFRD1	interferon-related developmental regulator 1	NM_001007245	cg25387411	37	7	112090077	F	TSS1500	N_Shore		-0.0190712	-52.4351	0.0016114	2.207	0.000426	GTCGGCTTCCAGCTGGCAGCTATGCAATCACCTTTGCTTCTCTTTCTCCG
FAM83D	family with sequence similarity 83, member D	NM_030919	cg26220336	37	20	37554591	F	TSS1500	N_Shore		-0.0515788	-19.3878	1.67e-05	3.145	4.38e-08	GCCTTTATCACCTGCCTTTAACCATGTATTCATTCATTCAAAGAATACCG
SPAG1	sperm associated antigen 1	NM_003114	cg27170159	37	8	101170019	F	TSS1500	N_Shore		-0.109852	-9.10316	0.00210191	5.968	0.0014	GTTTGTTGTAGAGTTAAAACGCTGGCATCAGCCGGGCGCGGGAGCTCACG
FAIM	Fas apoptotic inhibitory molecule	NM_001033030	cg02712878	37	3	138327370	R	TSS200	N_Shore	TRUE	-0.0677119	-14.7685	7.6e-05	2.203	0.000156	CGGGCAAAAACAGCCCTGTGCCTGCTCTGCAGCTATGGGGAAGGAATATC
PHGDH	phosphoglycerate dehydrogenase	NM_006623	cg07090813	37	1	120254330	F	TSS200	N_Shore		-0.0373602	-26.7665	0.000302743	3.323	1.26e-08	GCCAAAGCTCTTACCTACACCTGGTGAGCATATAAAAAGCACAATTTACG
ATL1	atlastin GTPase 1	NM_181598	cg07159958	37	14	51026681	F	TSS200	N_Shore		-0.109587	-9.12517	0.000388675	2.567	0.00368	CCCCAGACCGTGAAGACAGTGATAGACCACGTACCGCAACATTTTCAACG
ARMCX4	armadillo repeat containing, X-linked 4	NR_028407	cg13484245	37	X	100673096	R	TSS200	N_Shore		0.0391971	25.5121	0.00120247	0.311	6.46e-07	TGGGCTGAGGGTGGCGGTGACTAGCGCTGGGACCAGCTCCTTCTCTCTCG
TYRO3	TYRO3 protein tyrosine kinase	NM_006293	cg24491553	37	15	41851210	R	TSS200	N_Shore		-0.130366	-7.67071	6.8e-05	2.003	0.00033	CGCCGTCGCCGCCGCTGATTCATGTTCTTCTCGGAGCCGCCGCCTCCTCC
PAQR8	progestin and adipoQ receptor family member VIII	NM_133367	cg23136573	37	6	52230573	F	5'UTR	S_Shelf		0.102142	9.79029	0.0011323	0.342	9.68e-05	CGAGGAAATACAGACTCCAAATAAGTGGAGTCAGTGCTCCCAGTTACTTT
SLC26A2	solute carrier family 26 (anion exchanger), member 2	NM_000112	cg26303603	37	5	149344707	R	5'UTR	S_Shelf		-0.117126	-8.53781	0.00254842	3.419	8.94e-06	CTGAAGATTTAAAAACAGCTTCAAAATAAGCAATCAAGCGACAGTATACG
TCF19	transcription factor 19	NM_007109	cg02288747	37	6	31129751	F	Body	S_Shelf		-0.060989	-16.3964	0.000424288	3.19	0.00029	AGTGAGGACTCCACTTACCCAGTGGGAGTCAGTGGGGCTTTGTCTACACG
GAN	gigaxonin	NM_022041	cg03147852	37	16	81353400	R	Body	S_Shelf		-0.121301	-8.24396	0.00147677	2.113	0.000404	CGCTCATGATGACCTAGGCTGGATTTGAGGCCCTATGTCTCATTCTATCC
TTC27	tetratricopeptide repeat domain 27	NM_017735	cg05776245	37	2	32855761	F	Body	S_Shelf		-0.0567485	-17.6216	0.000792398	2.078	0.000106	CGGAAAGGTAGAATTTTATTTGAAATTTTCATAGAGGAACAGAGCAAATA
TTF2	transcription termination factor, RNA polymerase II	NM_003594	cg07573786	37	1	117606095	F	Body	S_Shelf		-0.0879243	-11.3734	0.00111893	2.056	0.000705	AGAAGTCAGACACAGAAGAGTACATGCAGTAGGATTTCATTTATATAACG
SS18L1	synovial sarcoma translocation gene on chromosome 18-like 1	NM_198935	cg08596055	37	20	60722646	F	Body	S_Shelf		-0.0626354	-15.9654	0.000232755	2.003	0.00724	CTGGGGATCCAGACACCCAGCAGACAGGCAGACACCACTGCTATTATCCG
MMRN2	multimerin 2	XM_006717970	cg09099242	37	10	88705536	F	Body	S_Shelf	TRUE	-0.0685512	-14.5876	0.000888432	2.688	6.62e-05	GAAGGCTCTCTTCTCAGGATAATGGATTCCAGAATCCCAGCACTGCTCCG
CAPS2	calcyphosine 2	NM_032606	cg11254602	37	12	75703120	R	Body	S_Shelf		0.0530255	18.8589	0.00155444	0.378	0.00755	CGCAGATAGCGAAGCAAAGCAGCAGAAGTGTATTAAGTGAAATATTACAC
ADK	adenosine kinase	NM_001123	cg12505085	37	10	75913585	R	Body	S_Shelf		-0.0521049	-19.1921	0.00101219	2.398	3.6e-07	CGCTAAAGAAATGAACTTGGATGAGATTTCCAAAGGAGAGAAAAGAAAAC
TSC22D1	TSC22 domain family, member 1	NM_183422	cg12694124	37	13	45013657	F	Body	S_Shelf		-0.106674	-9.37436	0.00086852	3.007	1.18e-06	CGATCCATATGTCTGGTGCCTCATCAGAGCTCACTGAGACTTGCTGACAG
CEP72	centrosomal protein 72kDa	NM_018140	cg14559234	37	5	650104	R	Body	S_Shelf		-0.144273	-6.9313	0.00193297	2.37	5.51e-06	CGCCTCACAGTCACACCTCACAGTCCACGCCTCACAGTCACGCCTCACAG
TNFRSF11A	tumor necrosis factor receptor superfamily, member 11a, NFKB activator	NM_003839	cg15315773	37	18	59997484	F	Body	S_Shelf	TRUE	-0.038211	-26.1705	0.000855615	2.287	0.000117	CGTGGGCACACAGGATAAGGAGTGCCTTCACCTGAAAGTGTCAGAGAGGA
RAP2A	RAP2A, member of RAS oncogene family	NM_021033	cg19283298	37	13	98090226	R	Body	S_Shelf		-0.0553449	-18.0685	0.000307589	2.874	0.0137	CGGAGGTATGTACACTTACAGACACTTAAGGGAGTATGGGTCAGTTTCAC
ZNF788	zinc finger family member 788	NR_027049	cg21289365	37	19	12207214	F	Body	S_Shelf		0.0673797	14.8413	7.87e-05	0.475	0.000417	CGGTGGGGACCCACGCGGGTTCAACATGCATATCGAGAAGTGTTATTTCT
CYB5R4	cytochrome b5 reductase 4	NM_016230	cg23194644	37	6	84573385	R	Body	S_Shelf		-0.0564134	-17.7263	0.00204418	2.305	0.00878	TTCAATACCATTCCTGTTATATGGTCAGCCCTGTGTAGCCCTGGGTTCCG
GPATCH4	G patch domain containing 4	NM_182679	cg24584367	37	1	156565633	R	Body	S_Shelf		-0.0720818	-13.8731	4.48e-05	2.124	4.99e-06	TCCTGGGCCTCTAGGCGAGCAAGCTTGGCCTTCATTGTGATCCCAAGACG
AHRR	aryl-hydrocarbon receptor repressor	NM_020731	cg24980413	37	5	346987	R	Body	S_Shelf		-0.0682924	-14.6429	0.000284205	2.489	8.83e-08	GGAAGCTCACGTAGCTTGCTGTGCCGTGAGTAGTAAGCCCTTTGTCTCCG
CBLL1	Cbl proto-oncogene-like 1, E3 ubiquitin protein ligase	NM_024814	cg27396403	37	7	107387175	R	Body	S_Shelf		-0.0700234	-14.2809	0.00024628	2.227	9.95e-09	CGGTATGATCATAAAATGGGTCATTTTTGCATAATGTTCAAGGGTTTCAT
SNORA27	small nucleolar RNA, H/ACA box 27	NR_002575	cg09363424	37	13	27829014	R	TSS1500	S_Shelf		-0.130617	-7.65597	0.00190286	2.655	0.000228	CGGGTAATGAGGAAAATTTAAATTCTGCTAAGAATAGCACTTTAAAAAAT
ZNF470	zinc finger protein 470	NM_001001668	cg26982279	37	19	57079381	R	1stExon	S_Shore		-0.0402852	-24.823	0.000106288	2.603	1.27e-05	CGCTCCTCGCCGTCCTGTGGACATGGAGCCCTGTCCTGGGCTCTGCCCCT
OSGIN1	oxidative stress induced growth inhibitor 1	NM_182981	cg05451527	37	16	83999617	F	3'UTR	S_Shore		-0.0726692	-13.761	0.00128273	3.008	1.06e-05	CGGCCAGACCCGCTGGCTCCCAGGCCCTGAGAGGACAGAGATGACCACAT
SOX2	SRY (sex determining region Y)-box 2	NM_003106	cg13325919	37	3	181432053	F	3'UTR	S_Shore		-0.0636629	-15.7077	0.000439724	4.368	0.000501	GCAGACTGATTCAAATAATACAGAGCCGAATCTTTTAAAATACAACTACG
INHBB	inhibin, beta B	NM_002193	cg25501422	37	2	121108133	F	3'UTR	S_Shore		-0.063862	-15.6588	0.000691627	5.341	0.000582	ACACACACACATAAGTCATGTCAGAGGCCCAAGCCACAAACAGTCAAACG
ARNTL	aryl hydrocarbon receptor nuclear translocator-like	NM_001030273	cg13286116	37	11	13302098	F	5'UTR	S_Shore		-0.0369897	-27.0346	0.0014428	2.469	8.33e-06	ACCTACTTTAGTTATCATGATGCTTCCTAAAATCACTGCATGTAATCACG
RIPK3	receptor-interacting serine-threonine kinase 3	NM_006871	cg20822579	37	14	24809073	R	5'UTR	S_Shore		-0.0571317	-17.5034	0.000424451	2.224	0.000795	CGGCTCGCAATTTCCAGAGGCCCCCTGGCACCTTCCAGCCTGATGTCGTG
SNRPN	small nuclear ribonucleoprotein polypeptide N	AF319524	cg21061553	37	15	25124213	F	5'UTR	S_Shore		-0.168578	-5.93197	0.00130826	2.376	0.0172	AATCACTTAAAAAGTACTAGCTGAAAGTAGTATTGTCCTTTTGCATTCCG
CYP27B1	cytochrome P450, family 27, subfamily B, polypeptide 1	NM_000785	cg24722099	37	12	58160843	R	5'UTR	S_Shore		-0.0382156	-26.1673	0.000208601	2.992	1.26e-06	TCTGGAGGCGTACTTGAGGGTCTGGGTCATGGTCTGGTTCAGGGTGCTCG
TCF7	transcription factor 7 (T-cell specific, HMG-box)	NM_003202	cg25947408	37	5	133451383	R	5'UTR	S_Shore		-0.0561668	-17.8041	0.000618446	2.619	0.000156	CCGCCGCCTTCAGGAGACAGAATTGGCCAAGGTTTCTTGGTTGGAGGGCG
CDT1	chromatin licensing and DNA replication factor 1	NM_030928	cg00506625	37	16	88872689	R	Body	S_Shore		-0.0286473	-34.9073	0.00250699	4.717	4.28e-05	CGGCTGCACCCTGAGCACACCAGCCCTCAGCTCAGGGTGAACCCAGCCCA
HOXC4	homeobox C4	NM_014620	cg03146625	37	12	54448729	F	Body	S_Shore		-0.114563	-8.72882	0.000497978	3.849	0.000453	CGCTACCTGACCCGAAGGAGAAGGATCGAGATCGCCCACTCGCTGTGCCT
ESPL1	extra spindle pole bodies homolog 1 (S. cerevisiae)	NM_012291	cg03815350	37	12	53663042	F	Body	S_Shore	TRUE	-0.0717267	-13.9418	0.000573989	2.906	1.24e-06	TGAGCAAGGCGGAGTGTGGCCTCTGGGCTTCCTTGTGCAGCAGCATTCCG
MALAT1	metastasis associated lung adenocarcinoma transcript 1 (non-protein coding)	NR_002819	cg04378603	37	11	65266494	R	Body	S_Shore		0.0374415	26.7083	0.00147102	0.0782	6.52e-05	GAAGGTGATCGAATTCCGGTGATGCGAGTTGTTCTCCGTCTATAAATACG
ERCC4	excision repair cross-complementation group 4	NM_005236	cg05509251	37	16	14014712	F	Body	S_Shore		0.0241212	41.4573	0.000420837	0.474	0.0017	GGGACCCCTCCCATCCCTCTTAGTGTTGTCAGGGAATTGCATCCTTCTCG
RPL27A	ribosomal protein L27a	NM_000990	cg05888947	37	11	8705581	F	Body	S_Shore		-0.0461585	-21.6645	0.0018612	4.202	4.55e-06	ACTATTTGTCGAAGTTGATCCGGTGGTGATGCAGACCACCAGCATTACCG
PLK4	polo-like kinase 4	NM_014264	cg10233639	37	4	128803642	R	Body	S_Shore		-0.0456585	-21.9017	0.000821214	5.222	4.46e-05	TGAAACCTCCTCTCTACCAAAAATACAAAAATTAGCTGCTGCTGGGCACG
SACS	sacsin molecular chaperone	NM_014363	cg16236672	37	13	23949979	R	Body	S_Shore		-0.0621507	-16.0899	1e-06	3.277	2.96e-07	CGCTCTGTATACCCTTATTGGGTTTGCCTTCTGGCAGAGGCGCCTCTGCA
NECAP1	NECAP endocytosis associated 1	NM_015509	cg17722033	37	12	8235314	R	Body	S_Shore		-0.0398291	-25.1073	0.00135375	2.068	0.0145	ATCATGCACTTTCAGTCGTGCTTGCTCCATTGCCAGTCCCCTTTCATTCG
TACC2	transforming, acidic coiled-coil containing protein 2	NM_206862	cg20509513	37	10	123924085	R	Body	S_Shore		-0.101759	-9.82714	3.89e-05	3.036	5.07e-07	AGGGCCGAACCGTCCTGTCATTGGTGGAGGCAGTGCTTGACTGTGCATCG
HIST2H2BF	histone cluster 2, H2bf	BC110793	cg20961007	37	1	149765026	F	Body	S_Shore		-0.0263776	-37.911	6.65e-05	2.057	0.000166	CGGATGAAAAGATTACAGGACTGACAATGAGGCCCTGGAGGGATCTGATG
SLC3A2	solute carrier family 3 (amino acid transporter heavy chain), member 2	NM_001012662	cg21692936	37	11	62623994	R	Body	S_Shore		-0.0317768	-31.4695	4.74e-05	2.522	1.66e-05	CGCACCAGAAGGCAGGACATAGGGAACCAGTTAGGAAAAAATCAGATCCT
KLF5	Kruppel-like factor 5 (intestinal)	NM_001730	cg21973667	37	13	73634424	R	Body	S_Shore	TRUE	-0.0687013	-14.5558	7.95e-05	4.885	0.000518	AGCTGGCAGTTGGCTTTTACACTTGCCCAGCAGCCGAATTAGAGCAACCG
AOX1	aldehyde oxidase 1	NM_001159	cg22953017	37	2	201451303	R	Body	S_Shore	TRUE	-0.0535826	-18.6628	2.52e-05	2.55	4.78e-06	GTCCCCAGTACACTGAGAGCAGCCTACAGAAATGGCTGAGCCTCAGCTCG
CIT	citron rho-interacting serine/threonine kinase	NM_007174	cg24973993	37	12	120242513	R	Body	S_Shore		-0.0849246	-11.7752	0.000356443	2.268	0.000391	CGCCACTTGGATGTTGTTGTCATCGGGGAACTTTGGAAACAGCCAGATTT
UBE2S	ubiquitin-conjugating enzyme E2S	NM_014501	cg00035623	37	19	55919836	F	TSS1500	S_Shore		-0.0654908	-15.2693	4.17e-05	2.546	1.47e-07	CTTAGCAATACAGGACGTGGGTCCAAGAGCATTTCCAGCACAAAATGGCG
NUFIP1	nuclear fragile X mental retardation protein interacting protein 1	NM_012345	cg00313876	37	13	45564444	R	TSS1500	S_Shore		-0.0430326	-23.2382	0.000210758	2.315	0.00033	ACACAGCCCAATACTCAATCCAGTCTGAGTTGCTGCGCAATTCCTTAACG
HBEGF	heparin-binding EGF-like growth factor	NM_001945	cg00521255	37	5	139726689	R	TSS1500	S_Shore		-0.0528445	-18.9234	0.0010619	5.11	1.67e-10	CGGGTTTATGAGAACGGCTGGCATTCACGTGTCTAATTTTTAAATGATAG
SUCLA2	succinate-CoA ligase, ADP-forming, beta subunit	NM_003850	cg01732984	37	13	48575859	F	TSS1500	S_Shore		-0.0561074	-17.823	0.000245219	2.267	0.00135	GCATCAGAAGCGCATGACACCGACCATCTTCTCTTTGAGCATCACAAGCG
SFPQ	splicing factor proline/glutamine-rich	NM_005066	cg01938422	37	1	35659480	R	TSS1500	S_Shore		-0.12518	-7.9885	3.79e-05	2.104	3.63e-08	TAAGGTACTTTTAAAAAATTACAATGTTAGGCTGGGCACTGTGGCTCACG
NOL10	nucleolar protein 10	NM_024894	cg02196655	37	2	10830764	R	TSS1500	S_Shore		-0.0618499	-16.1682	3.61e-05	2.078	8.62e-05	CGTAACATCGCAGAAACACTGGAGGAGAGAAGAGAATACACTTCCACTCG
PGGT1B	protein geranylgeranyltransferase type I, beta subunit	NM_005023	cg04529658	37	5	114598980	F	TSS1500	S_Shore		-0.0654929	-15.2688	0.0017502	2.612	0.00538	AATAAACATTTATCTCCACTGGTTTGTTTTTCTGTTTCCCTAACCGTTCG
RSL1D1	ribosomal L1 domain containing 1	NM_015659	cg05852052	37	16	11946115	R	TSS1500	S_Shore		-0.146916	-6.80661	0.000455466	2.247	4.07e-06	CGCGCACCACCACGCCGGCTAATGTTTATAATTTTTGGAGAGACGGAGTC
DPY19L1	dpy-19-like 1 (C. elegans)	NM_015283	cg06033194	37	7	35079111	R	TSS1500	S_Shore		-0.107072	-9.33951	4.46e-05	2.057	0.00259	CGGTACCAGCTTAAGGGAGGCAGTTCCTGAATTCAGGGCCTATCACATAA
SERBP1	SERPINE1 mRNA binding protein 1	NM_001018067	cg06764498	37	1	67897436	F	TSS1500	S_Shore		-0.0888514	-11.2547	0.00242882	2.414	0.000489	CTGCTCGGAAATTGATGATTACATTCCGCCATGTTACATATCCTGACACG
GEM	GTP binding protein overexpressed in skeletal muscle	NM_005261	cg07306755	37	8	95274853	R	TSS1500	S_Shore		-0.0673714	-14.8431	1.37e-05	8.761	5.84e-10	ACTAAGTGACACTTAATCGTCCTTCCCAGCAAAGCACTTGCGAGCTGTCG
ARGLU1	arginine and glutamate rich 1	NM_018011	cg08453322	37	13	107220725	R	TSS1500	S_Shore		-0.00891382	-112.185	0.000134931	2.346	0.0218	CGTGCTTAATTCATTCAACAGGCGTTGGCATCTTACCAGGGAGGAAAAAA
ZNF468	zinc finger protein 468	NM_001277120	cg08531263	37	19	53361164	F	TSS1500	S_Shore		-0.0637992	-15.6742	8.33e-05	3.093	0.000185	AAGATTTCTATACTGTCCTGTGGGCCATCAGCATGAAATCCTACGTTCCG
NRCAM	neuronal cell adhesion molecule	NM_001037132	cg09561125	37	7	108097477	F	TSS1500	S_Shore		-0.0894661	-11.1774	9.84e-06	2.166	8.01e-05	ATTCCTTGGGACCAGAAGACCCAGTTTCTACCGCGGATAGATAGCATCCG
PRKD1	protein kinase D1	NM_002742	cg10077239	37	14	30397686	R	TSS1500	S_Shore		-0.0644796	-15.5088	0.00200067	3.158	1.02e-06	CACAGAAAGGGGTTTAAACTTGTCTCTACCCTTTTTGTCGCTCTGACGCG
TIMM8A	translocase of inner mitochondrial membrane 8 homolog A (yeast)	NM_004085	cg10321928	37	X	100604176	F	TSS1500	S_Shore		-0.0535908	-18.6599	0.000168187	2.304	0.00014	GAATGAATCTGAAAGTTGGGCACAAACTGCCATAGCCTCATTTCCCTACG
LRP4	low density lipoprotein receptor-related protein 4	NM_002334	cg12627354	37	11	46940434	F	TSS1500	S_Shore		-0.0419247	-23.8523	0.00055495	2.469	3.9e-06	CGAGCACCTGAGCTGACCCAAGTCGCCTGGACGTGACCCTGCCCCCGCCT
KLF9	Kruppel-like factor 9	NM_001206	cg13696409	37	9	73030641	F	TSS1500	S_Shore		-0.0341329	-29.2972	0.00245874	2.384	9.12e-06	TAGTACAGTGGTGTAATCAGGGCTCACTGCAGCCTTGACCTAGGCTGACG
MNS1	meiosis-specific nuclear structural 1	NM_018365	cg13816802	37	15	56757552	R	TSS1500	S_Shore		-0.0381249	-26.2296	0.00177558	2.86	2.75e-06	TCCCTCCAGCGGCCGAACTGTGGTTTCAGTGGGTTTGGGAGCCAAGTTCG
HIGD1A	HIG1 hypoxia inducible domain family, member 1A	NM_001099668	cg14508777	37	3	42847116	F	TSS1500	S_Shore		-0.0563316	-17.752	0.00155636	2.007	0.0338	CGGGGACAGGGCTCCTAATGTGTTTGTCAAGTAAATAATGAGTAATAATC
EIF2B3	eukaryotic translation initiation factor 2B, subunit 3 gamma, 58kDa	NM_020365	cg14611683	37	1	45452580	R	TSS1500	S_Shore		-0.0575135	-17.3872	0.00126987	2.056	0.00266	AGCCTCTTTCCTCAGGGAGTAAGTCTAAGACCTGGCTTCGAGTACATTCG
CD58	CD58 molecule	NM_001779	cg17215278	37	1	117114263	R	TSS1500	S_Shore	TRUE	-0.0628616	-15.908	0.000616816	3.045	1.26e-05	CGGGGGAGGCCTGCCTCAGGTAACCCTACGCCTAACAGTTGTCTAAAATG
LIN9	lin-9 homolog (C. elegans)	NM_173083	cg17985912	37	1	226497578	R	TSS1500	S_Shore		-0.0448599	-22.2916	0.00167484	2.878	2.51e-06	TTTAGGCCGACAGCTAAAGAACTGTTCTGCTCAGCTGTTTCATCCATTCG
ELK4	ELK4, ETS-domain protein (SRF accessory protein 1)	NM_001973	cg19028997	37	1	205603040	R	TSS1500	S_Shore		-0.0775116	-12.9013	0.00108412	2.642	2.73e-05	TTCCTCACACAACAGATGGTTCTGTTTGTGCAAACTCCATGGTAGTTACG
RRAD	Ras-related associated with diabetes	NM_004165	cg19428417	37	16	66959729	F	TSS1500	S_Shore		-0.0946048	-10.5703	0.000143655	11.05	7.7e-06	CGGGGTAAACCCAATCAGCCAAAAGCAGCAACTGCCCTCTGGAGAAGAAT
LIF	leukemia inhibitory factor	NM_002309	cg19539004	37	22	30643376	F	TSS1500	S_Shore		-0.0450129	-22.2159	0.000954935	15.66	1.42e-07	AGTGCACTGGTGGTGTCTGGAGGCCTGACCCTCTGGGGCCCTGGGCAACG
PAIP1	poly(A) binding protein interacting protein 1	NM_006451	cg19565757	37	5	43557653	R	TSS1500	S_Shore		-0.035989	-27.7863	0.00044558	2.295	0.000149	ACTGCTGAGGAGTGGTCCCTGGGAGACTGTCACCTGCTCCGTTAGCATCG
ANKH	ANKH inorganic pyrophosphate transport regulator	NM_054027	cg21215929	37	5	14873039	R	TSS1500	S_Shore		-0.0700807	-14.2693	0.0016924	4.233	6.9e-09	CGGGCCCTCTGTGACTTCACAGATCGCACGCCCGTGAAGCCAGCCCTGCC
GLRX2	glutaredoxin 2	NM_016066	cg21815704	37	1	193075249	F	TSS1500	S_Shore		-0.0935651	-10.6877	0.00181696	2.196	6.84e-07	TTCAGTGTCCTCAGTAAATAAAGGCTTACCCCCAACCTTAAATAGTGACG
HSP90AA1	heat shock protein 90kDa alpha (cytosolic), class A member 1	NM_001017963	cg23904247	37	14	102554826	R	TSS1500	S_Shore		-0.0596967	-16.7513	4.99e-05	2.143	0.0412	CGCTCTTAAGGGGGTCCCAGGCCGCAGTCTGAAAACCCCTGCTCCTGAGC
PLXNA4	plexin A4	NM_181775	cg24725079	37	7	132262675	F	TSS1500	S_Shore		-0.0558131	-17.9169	0.000453932	3.598	0.000325	AGGTTACCAAGCCAGCTCTGGGGCACTGGCCACTCATGTTCTCTCGTGCG
IGFBP3	insulin-like growth factor binding protein 3	NM_001013398	cg24772240	37	7	45961537	R	TSS1500	S_Shore		-0.063441	-15.7627	0.000381617	6.254	8.02e-06	CGGTGTAGCAACACGTGAGAGTCTTCTTGCGTTGAGAAGTAAGCCTGGAA
BMP8B	bone morphogenetic protein 8b	NM_001720	cg25190824	37	1	40255903	R	TSS1500	S_Shore		0.0908976	11.0014	0.000536415	0.463	0.0193	CGGTAAAAGACAGACTAGGCATGTGCTTAAGGAGCCAGCAAATGACCATT
CNN3	calponin 3, acidic	NM_001839	cg26227186	37	1	95393138	F	TSS1500	S_Shore		-0.0207141	-48.2763	0.00103031	2.157	0.0146	AAGCAGGTGTCGGTGGAGGCCCCAGTTCCTCCGGCCCAGAGGCTCCAACG
IL11	interleukin 11	NM_000641	cg26279025	37	19	55882154	R	TSS1500	S_Shore		-0.069001	-14.4925	0.000123385	58.16	6.4e-09	AGCAGACACTCAGGCTCAAGCGCTGGGGCCCGACTGTGGGTGGGGGTCCG
GINS2	GINS complex subunit 2 (Psf2 homolog)	NM_016095	cg26571870	37	16	85723150	R	TSS1500	S_Shore		-0.069498	-14.3889	0.00114569	3.171	1.29e-08	ATCGTGCCAGGCCAAGAGTACAAGCATTTATTGGCCCAAACTCAGCACCG
FOXS1	forkhead box S1	NM_004118	cg07809909	37	20	30433512	F	TSS200	S_Shore		-0.0411448	-24.3044	0.00225694	5.86	2.02e-05	CGCCCCACTCCCACAAGGCCCAAAAGAGGCGGGCAGGAGAGGCCAGTAGT
TRIM36	tripartite motif containing 36	NM_018700	cg09312149	37	5	114516420	R	TSS200	S_Shore		-0.0491861	-20.3309	0.0015884	2.15	3.03e-05	CGGGGCTTGGTCTTTATTACCTATTGGATTTCAGGAAGGCTGACTTGAGA
CHORDC1	cysteine and histidine-rich domain (CHORD) containing 1	NM_012124	cg09488196	37	11	89956718	F	TSS200	S_Shore		-0.041134	-24.3108	0.000256528	2.525	2.59e-05	AGTTATTAAAATTGCTCCTGAGATGAGGGCACTCGAGACACAAACACACG
ERN2	endoplasmic reticulum to nucleus signaling 2	NM_033266	cg16786481	37	16	23724835	R	TSS200	S_Shore		-0.0725747	-13.7789	0.000115274	2.639	0.00199	CGGCTCTCAGCCTCCGCTTGTACCTGCTGTGCAGTGAGGACTCCAGGAAC
DNAJA4	DnaJ (Hsp40) homolog, subfamily A, member 4	NM_018602	cg21642988	37	15	78558406	R	TSS200	S_Shore	TRUE	-0.035266	-28.3559	0.00102397	2.246	1.76e-05	CGCAAGTGAGTAACAGACAAATGGTCTTACAGGAAAGCATTTTAAACTTG
DNA2	DNA replication helicase/nuclease 2	NM_001080449	cg24118715	37	10	70232072	R	TSS200	S_Shore		-0.040456	-24.7182	0.000866887	3.392	0.00526	ACACGCTTAGTTTGAACACAACCACATTTGTAGTTGCCCAAAACCAGGCG
ACVR1	activin A receptor, type I	NM_001105	cg02089380	37	2	158732891	F	TSS1500	TSS1500		-0.0122647	-81.5348	1.74e-05	3.033	0.000363	CGGAGCGCTCGGCCAATGAGTGTCTGGAGCTGTGATTAACCAGGCAGCAA
IL13RA2	interleukin 13 receptor, alpha 2	NM_000640	cg03244736	37	X	114252923	R	TSS1500	TSS1500		-0.0681671	-14.6698	0.000451927	3.417	0.00293	CATTATTGTTCCACTTTTTCCTGTGTTTCCTTTATTAGTAAATGGCATCG
UQCRB	ubiquinol-cytochrome c reductase binding protein	NM_001254752	cg04462334	37	8	97249283	F	TSS1500	TSS1500		-0.0627577	-15.9343	0.0014915	2.156	0.000415	TCTTAGATTTAATCTTTAAAAACCTTTTCTGCTGGGCATGATGGCTCACG
RNF217	ring finger protein 217	NM_152553	cg05033185	37	6	125303034	F	TSS1500	TSS1500		-0.125167	-7.98933	0.00127689	2.791	3.66e-06	TTCTGCCTCAGCCCCAGGAGCAGCTGGGACTACAGGTGCCCATAACCACG
TMEM133	transmembrane protein 133	NM_032021	cg08144237	37	11	100862189	R	TSS1500	TSS1500		-0.0611402	-16.3559	0.00213689	2.371	0.000519	AACAATGTGAAGATACATTAGAATTGCCACATCCATATCTTCAAAACACG
ATP13A3	ATPase type 13A3	NM_024524	cg10173291	37	3	194190120	F	TSS1500	TSS1500	TRUE	-0.119126	-8.39447	0.00167547	3.133	3.63e-08	TTCCCAGGCCGGAGTGCAGTGGTGTGATCTCTGCTCATTGCAACCCTCCG
FCN3	ficolin (collagen/fibrinogen domain containing) 3	NM_003665	cg13082816	37	1	27702055	R	TSS1500	TSS1500		-0.0651335	-15.3531	0.00018946	3.983	0.000332	CGCTGGAATGCAGTAGATGCCCAGGAAATGGTAGCAGTTGTCACTATTCA
CLEC2D	C-type lectin domain family 2, member D	NM_001004419	cg13553498	37	12	9821986	R	TSS1500	TSS1500		-0.104595	-9.56069	0.0021926	2.139	2.37e-06	CCTTCCTTTCAATAAATTCTTATTTTCTATCATAATATTGCTTTGTACCG
IL1RL1	interleukin 1 receptor-like 1	NM_016232	cg16386158	37	2	102927397	R	TSS1500	TSS1500		-0.0160719	-62.2204	0.00144708	6.853	3.46e-09	CGCAATCCTCAGAAGCTGACAGGAGCTTCAGAGAGGAGAATTACCTTACC
IL6	interleukin 6	NM_000600	cg17067544	37	7	22765321	F	TSS1500	TSS1500		-0.091373	-10.9442	0.000345045	3.91	4.36e-09	GTCATCCATTCTTCACCGATTGTCTAAACAGAGACGGTGGTCCTCTGCCG
KIAA1644	KIAA1644	NM_001099294	cg18649854	37	22	44709891	R	TSS1500	TSS1500		-0.0662068	-15.1042	0.00143834	2.522	8.19e-05	TGGGAAACCAGGGGGCTATGGGCGCCCAGAGTGCCTGATGCAGCCTGACG
TES	testis derived transcript (3 LIM domains)	NM_152829	cg21083093	37	7	115861820	F	TSS1500	TSS1500		-0.0700216	-14.2813	3.44e-05	3.169	0.000189	TTTCCTTCACTTTAATGGAACAACAAGCACAAAAATCAAAATCAGATTCG
RND1	Rho family GTPase 1	NM_014470	cg22514963	37	12	49259997	F	TSS1500	TSS1500		-0.0541213	-18.477	7.86e-05	27.35	2.75e-05	CGGGTGGGTTACAAAAGCAGGACCTGCTTAGACTATAGACAGGTGTGTGT
ATP6V0D2	ATPase, H+ transporting, lysosomal 38kDa, V0 subunit d2	NM_152565	cg27040884	37	8	87110546	R	TSS1500	TSS1500		-0.0146468	-68.2743	0.00217309	8.177	0.000179	ACAATCTTAGCTTACTGCAACTTCCGCCTCCCACGTTCAATCGATTGTCG
IL1A	interleukin 1, alpha	NM_000575	cg27368523	37	2	113544348	F	TSS1500	TSS1500		-0.0541471	-18.4682	0.000599961	3.817	0.0027	TTTAGATGACAGTGACTCATTAAGGGTTTCCTGAGGCCTCCTCAGAGTCG
SNORD7	small nucleolar RNA, C/D box 7	NR_003037	cg02963846	37	17	33900674	F	TSS200	TSS200		0.0470424	21.2574	0.00065185	0.479	0.000104	GAAGCAATGGCAATACCAGGTCAGGCTCTACTTCACTCATCATCGCATCG
BTK	Bruton agammaglobulinemia tyrosine kinase	NM_000061	cg03791917	37	X	100641287	R	TSS200	TSS200		-0.0464463	-21.5302	0.000121121	3.33	0.000375	CGGCAGCAGGGAACCAGATAGCATGCTGCTGAGAAGAAAAAAAGACATTG
SLC25A34	solute carrier family 25, member 34	NM_207348	cg06761377	37	1	16062757	F	TSS200	TSS200		-0.066269	-15.09	0.000553937	2.782	0.00032	CGCTGGAACAGCTGAGCAGAGCAGGTGGACTGCTGAGATAGACCAGGGAC
C11orf94	chromosome 11 open reading frame 94	NM_001080446	cg12019650	37	11	45928841	F	TSS200	TSS200		-0.0639053	-15.6482	0.000620031	2.054	0.00929	CGGAACCCGTTGCCGGCTCCCAGGGCCACCTCACAAAGGGCCTTCATTCC
STARD13	StAR-related lipid transfer (START) domain containing 13	NM_001243466	cg16795307	37	13	33780362	R	TSS200	TSS200		-0.0320211	-31.2294	0.00245055	2.039	0.0186	CGGTGGGGGTGCCTAGGAGAAGGAGCACCCCCCTTGGTTTGTGATAGACT
LXN	latexin	NM_020169	cg22210627	37	3	158390671	F	TSS200	TSS200		0.0335437	29.8119	0.000177679	0.452	3.98e-07	CGCTGATATAGGACATCTCTGAAGACTCTAGTTTCCTGTCCATGGGAAAA
CFH	complement factor H	NM_000186	cg23557926	37	1	196620963	F	TSS200	TSS200		0.0350765	28.5091	0.000519756	0.393	0.00029	CGGAGAATTTCCCTAGCTTAATAAGAAAAAGTCCAAGAGCCGGTCACAGC
LAPTM5	lysosomal protein transmembrane 5	NM_006762	cg24459792	37	1	31230846	F	TSS200	TSS200		-0.063759	-15.6841	0.000461621	2.768	3.99e-07	CGGTCATCATGCCCTTCTCTGCACCAGGGCCAGGGTTCCACCGTTTCACA
SSH1	slingshot protein phosphatase 1	NM_001161331	cg27553890	37	12	109221424	R	TSS200	TSS200	TRUE	-0.0610051	-16.3921	5.66e-06	4.703	1.16e-07	CGGCCTACAGAAAAGCCCGTAGGAGTGCAGTGATTAGAGGAACCTCAGCT
